# Supplementary material for: LIN37-DREAM prevents DNA end resection and homologous recombination at DNA double-strand breaks in quiescent cells
Source: PubMed Central journal article supplement (PMC8416021; doi:10.7554/elife.68466), 2021-09-03

Figure 2A

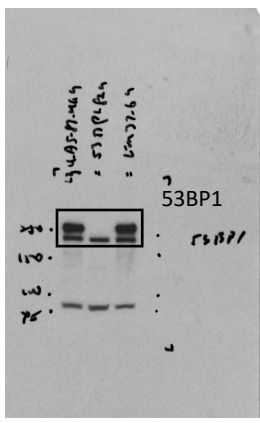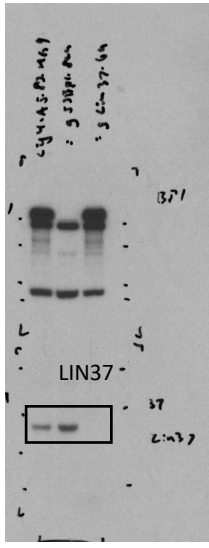

Figure 2C

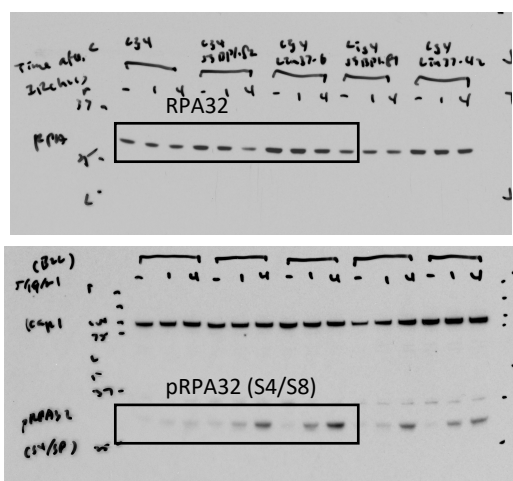

Figure 2F

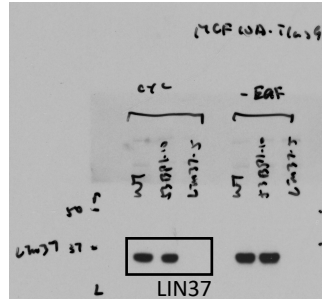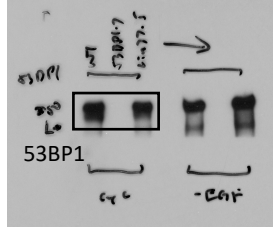

Figure 4A

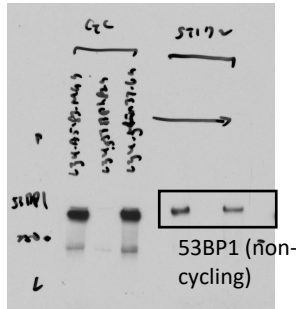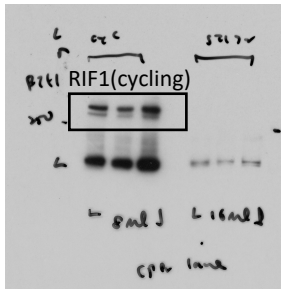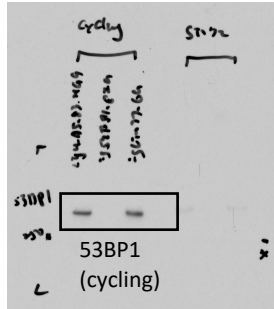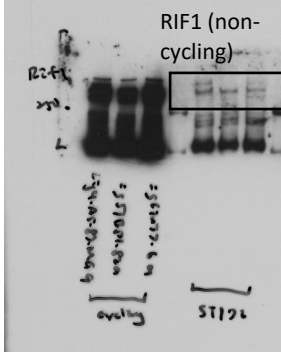

Figure 3A

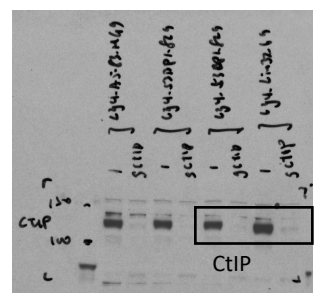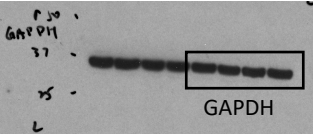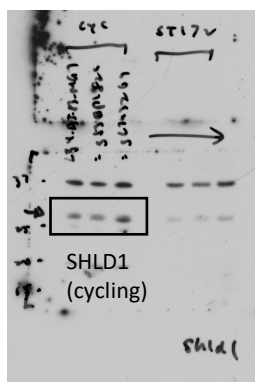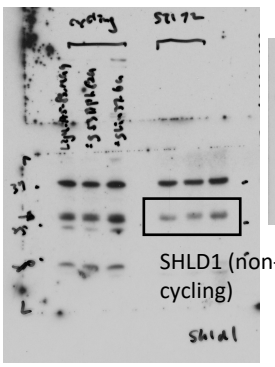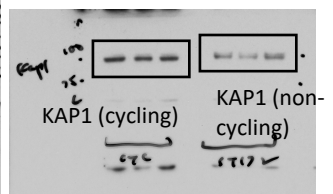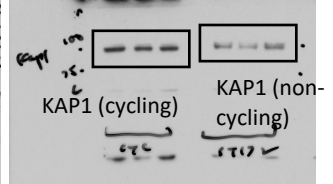

Figure 4D

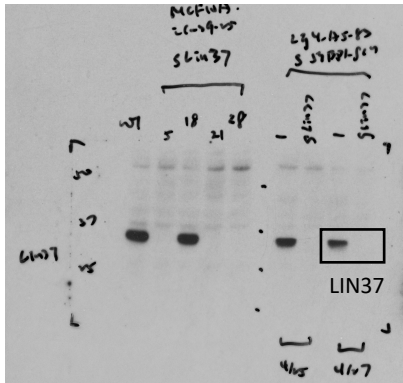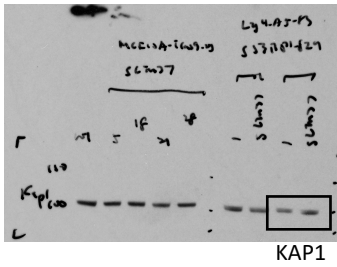

Figure 4E

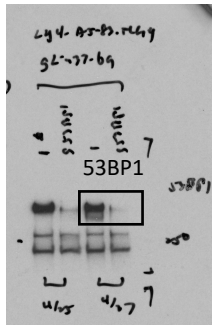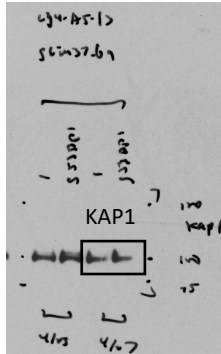

Figure 5A

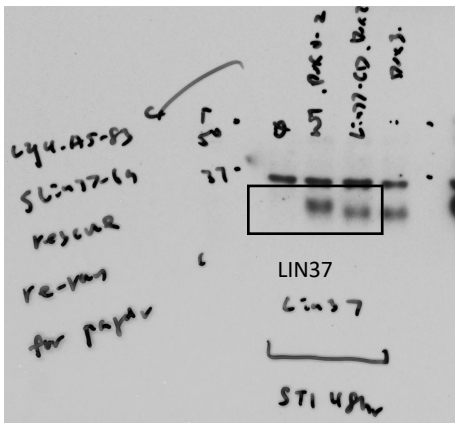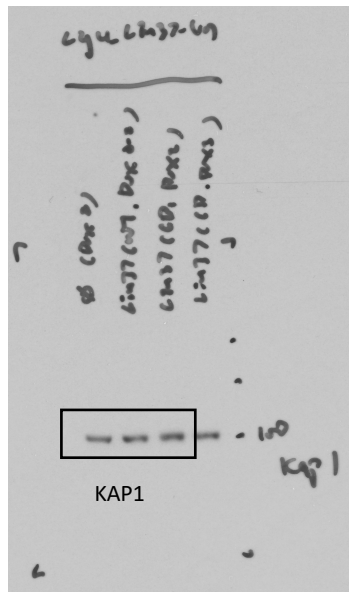

Figure 5C

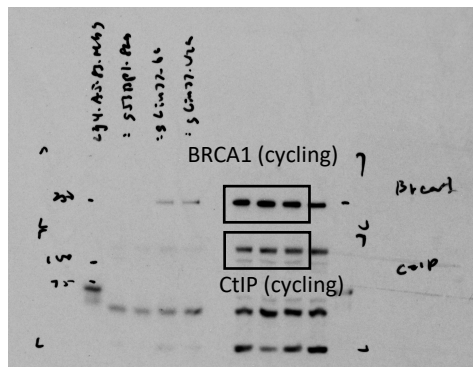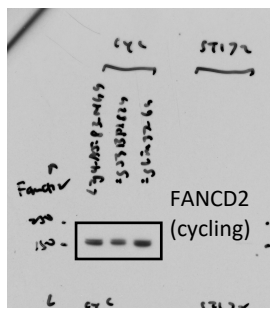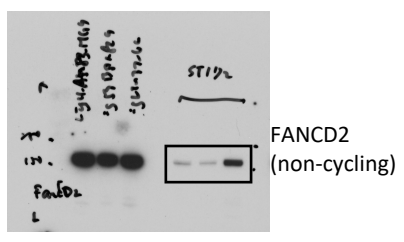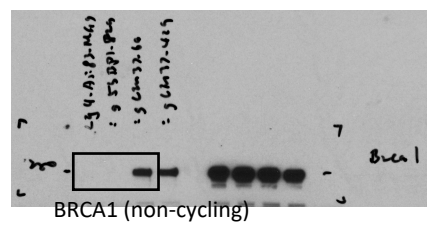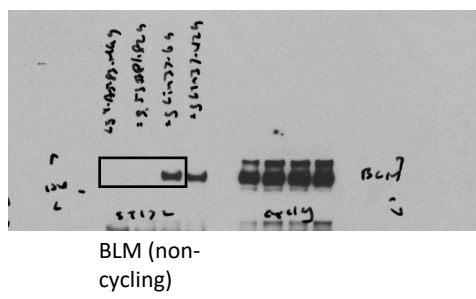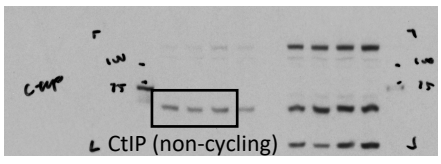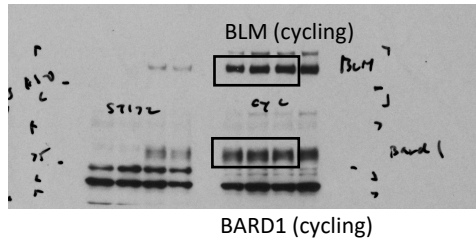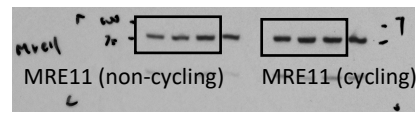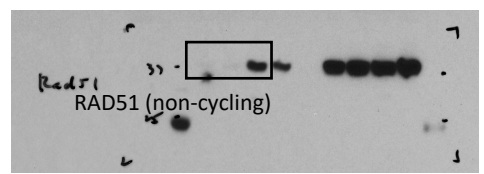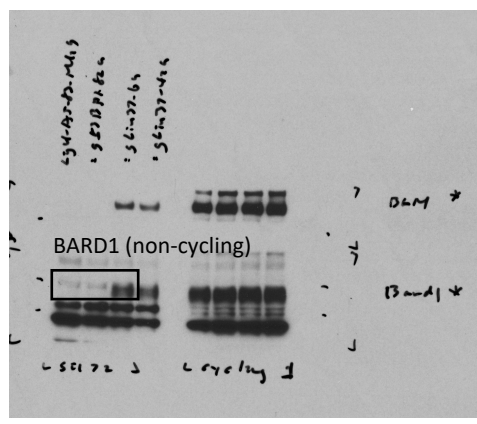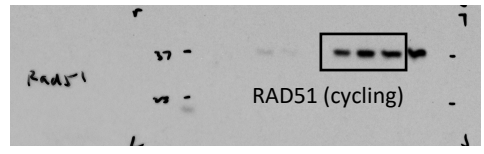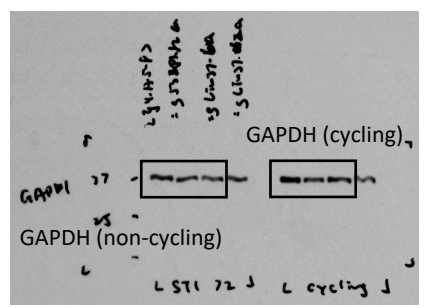

Figure 5D

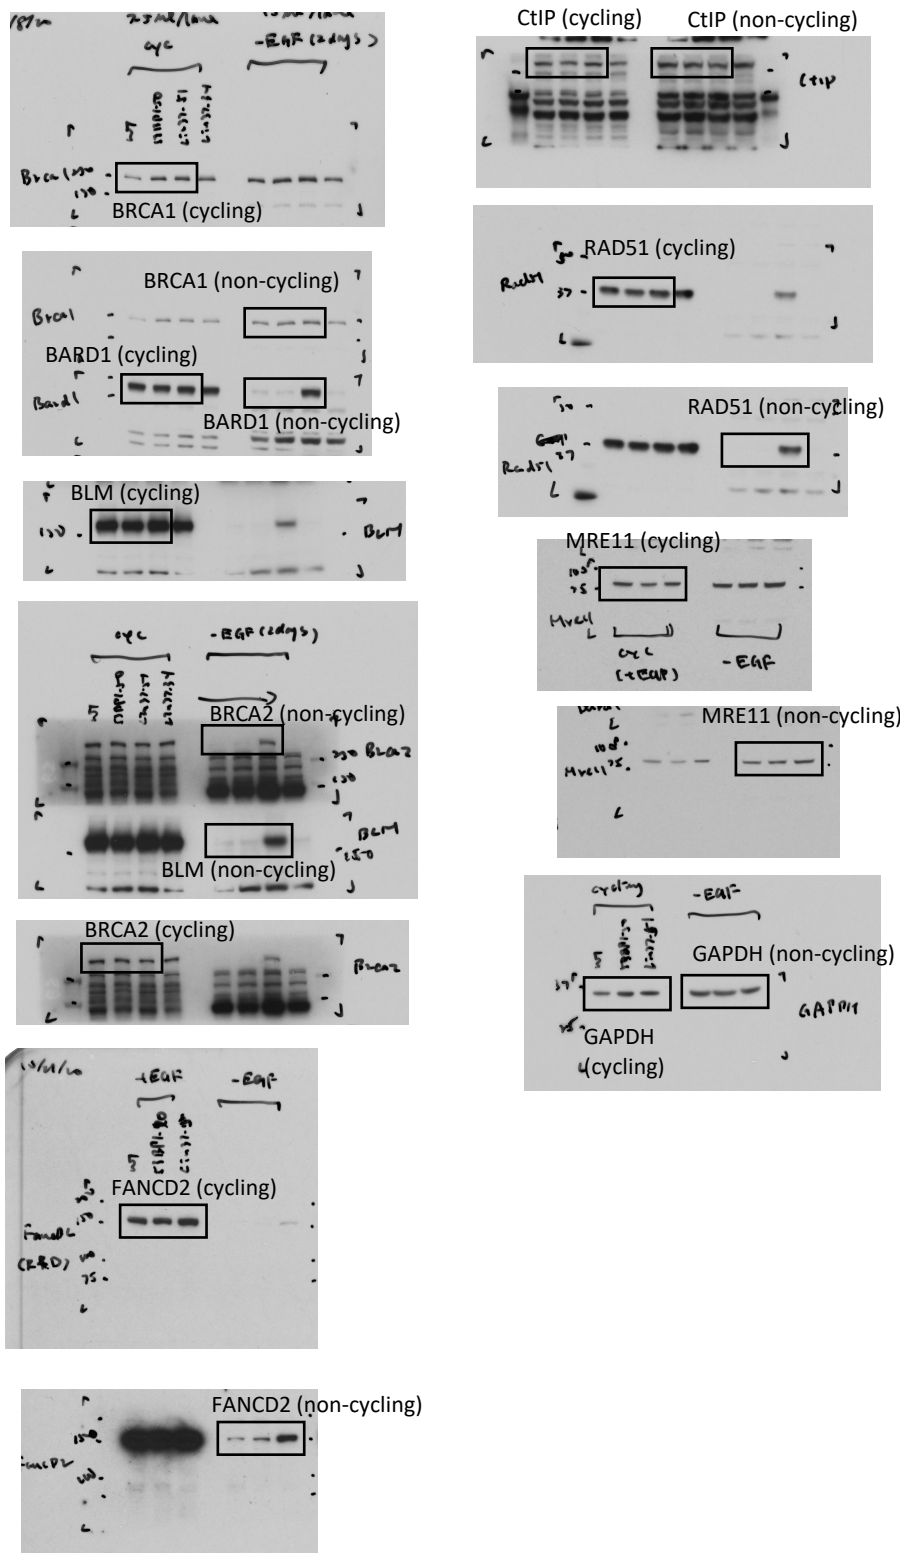



Figure 5E

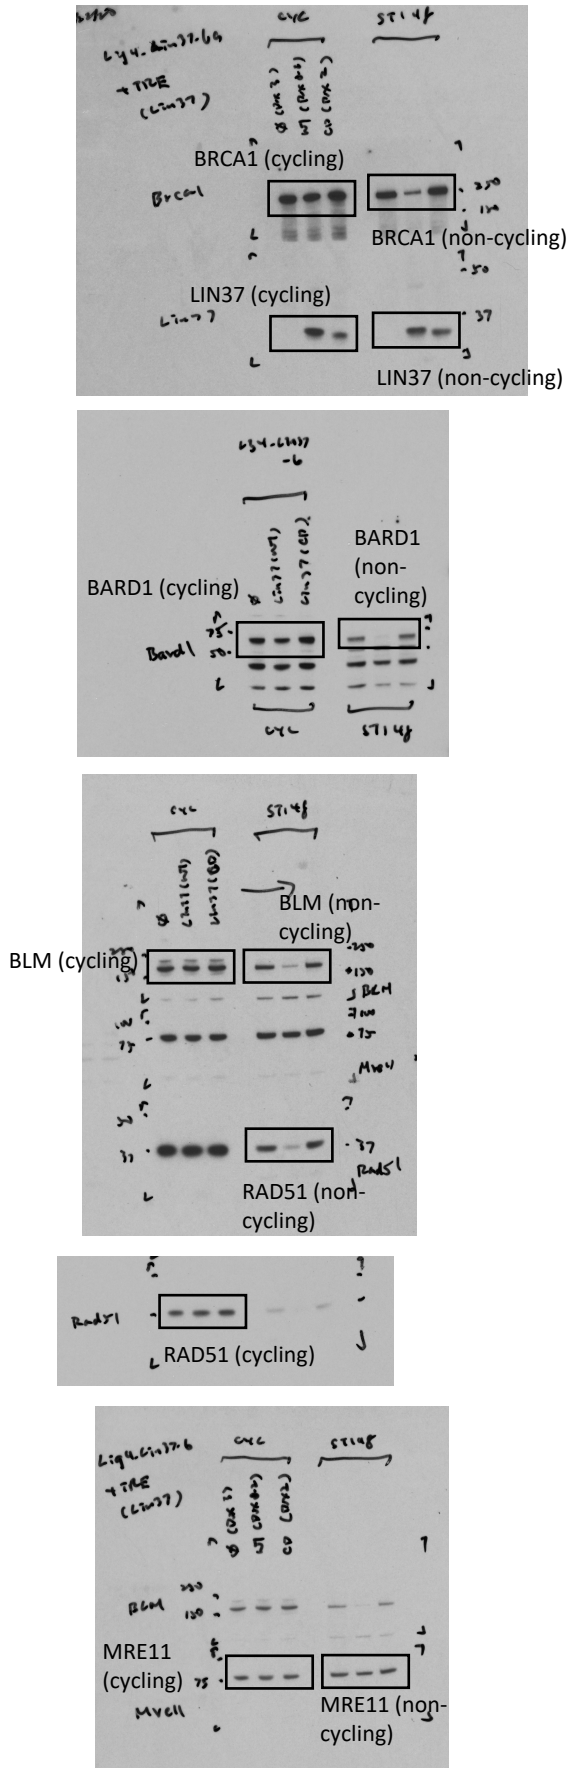

Figure 6A

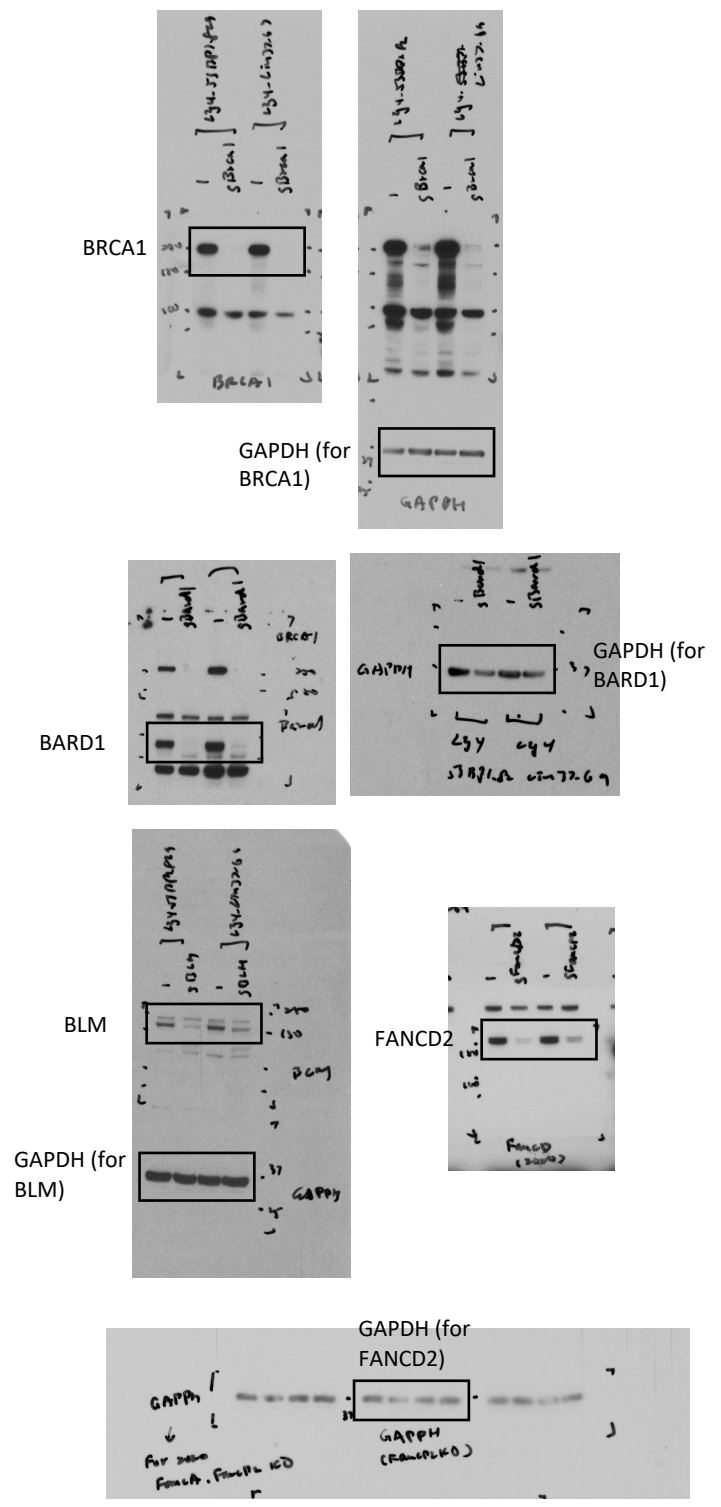

Figure 7A

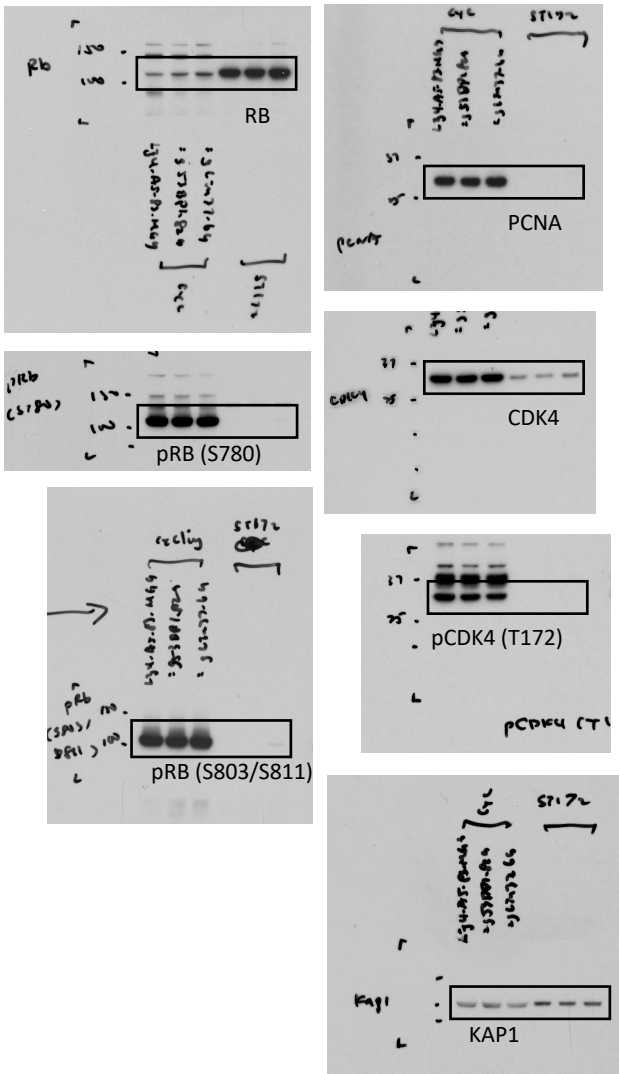

Figure 7B

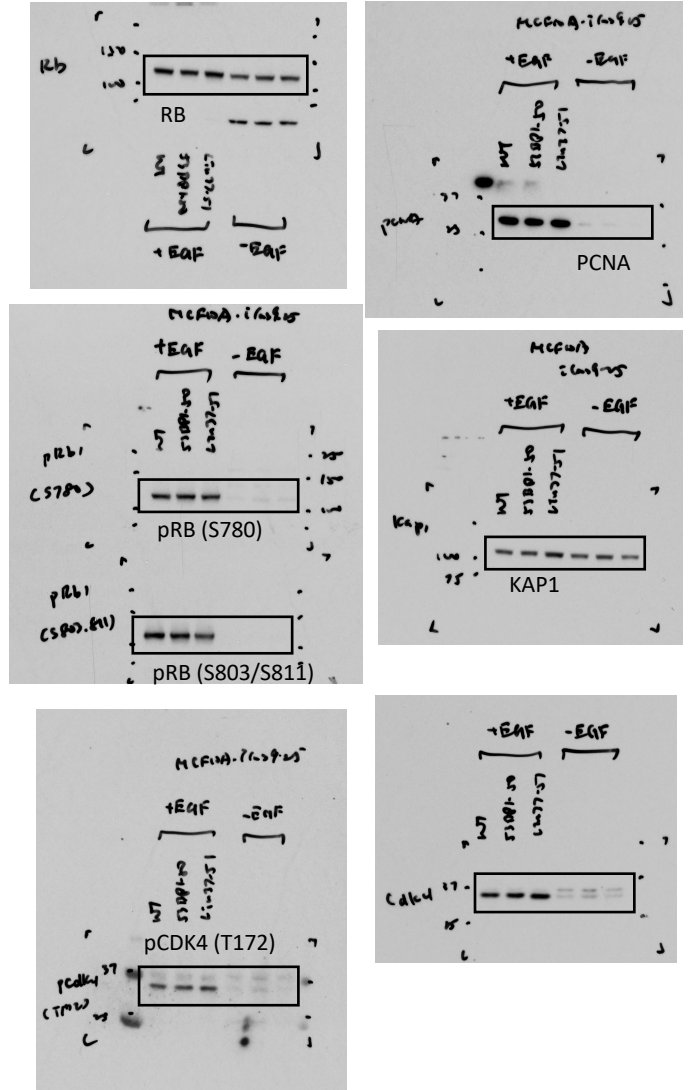

Figure 7C

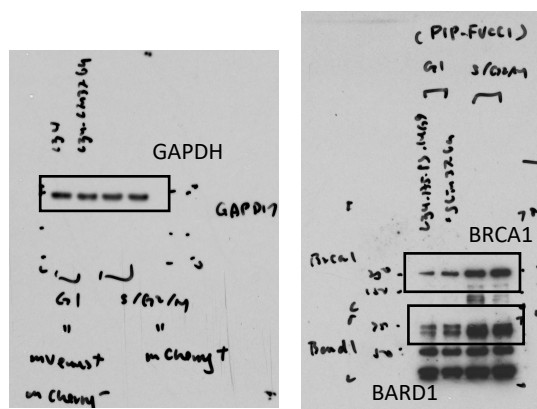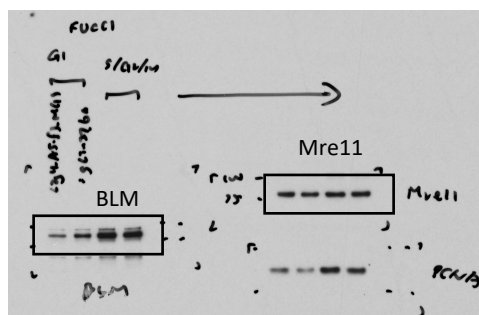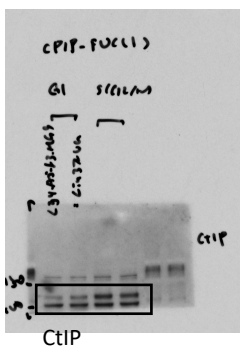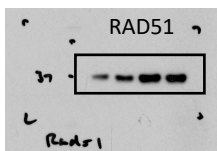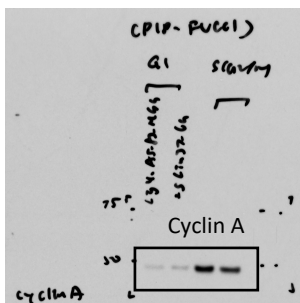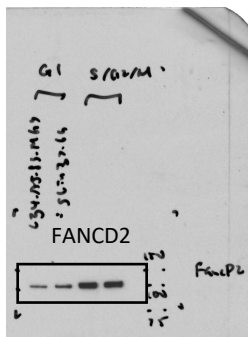

Figure 7D

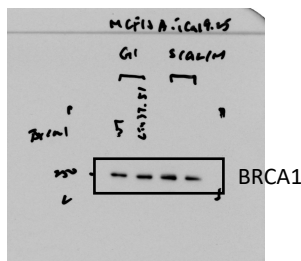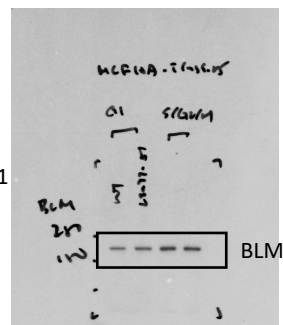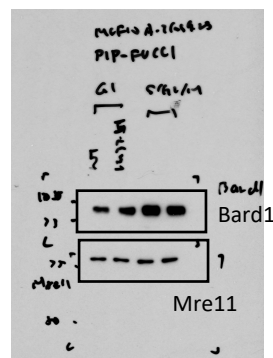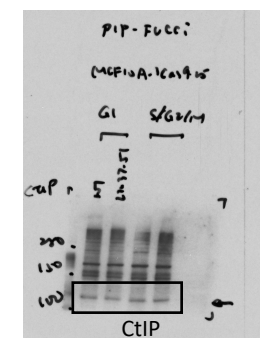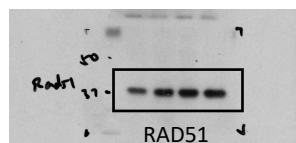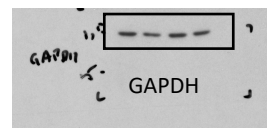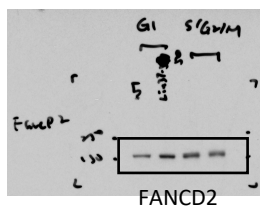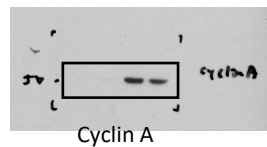

Figure 2 supplement 1A

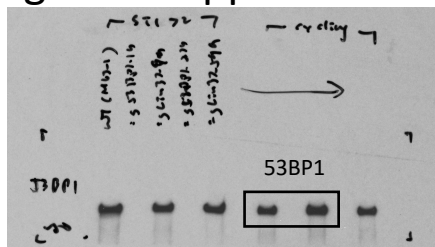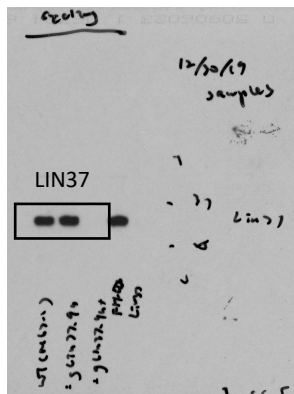

Figure 4 supplement 1A

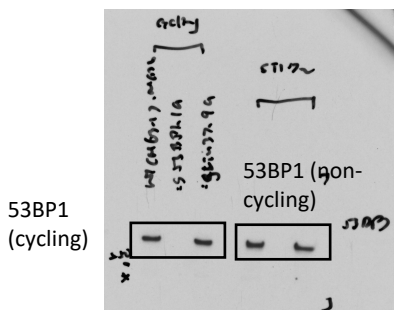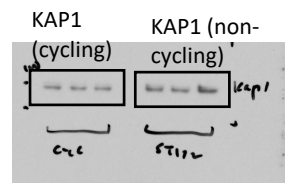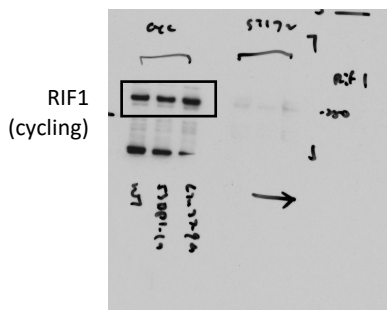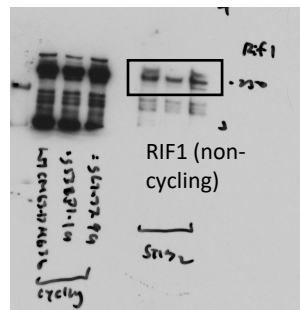

Figure 3 supplement 1B

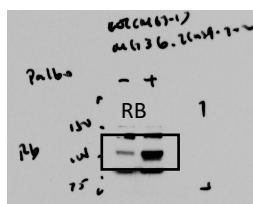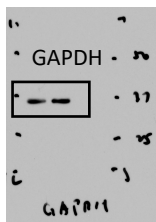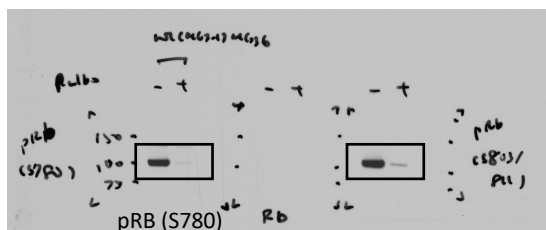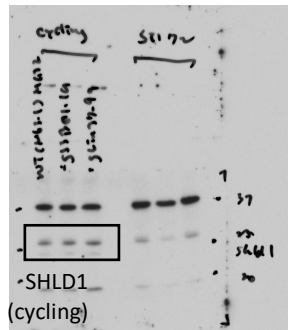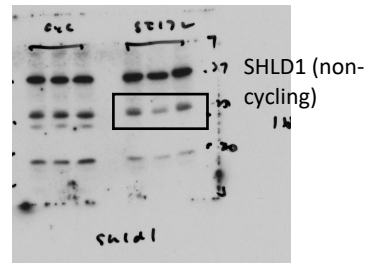

# Figure 5-figure supplement 1B

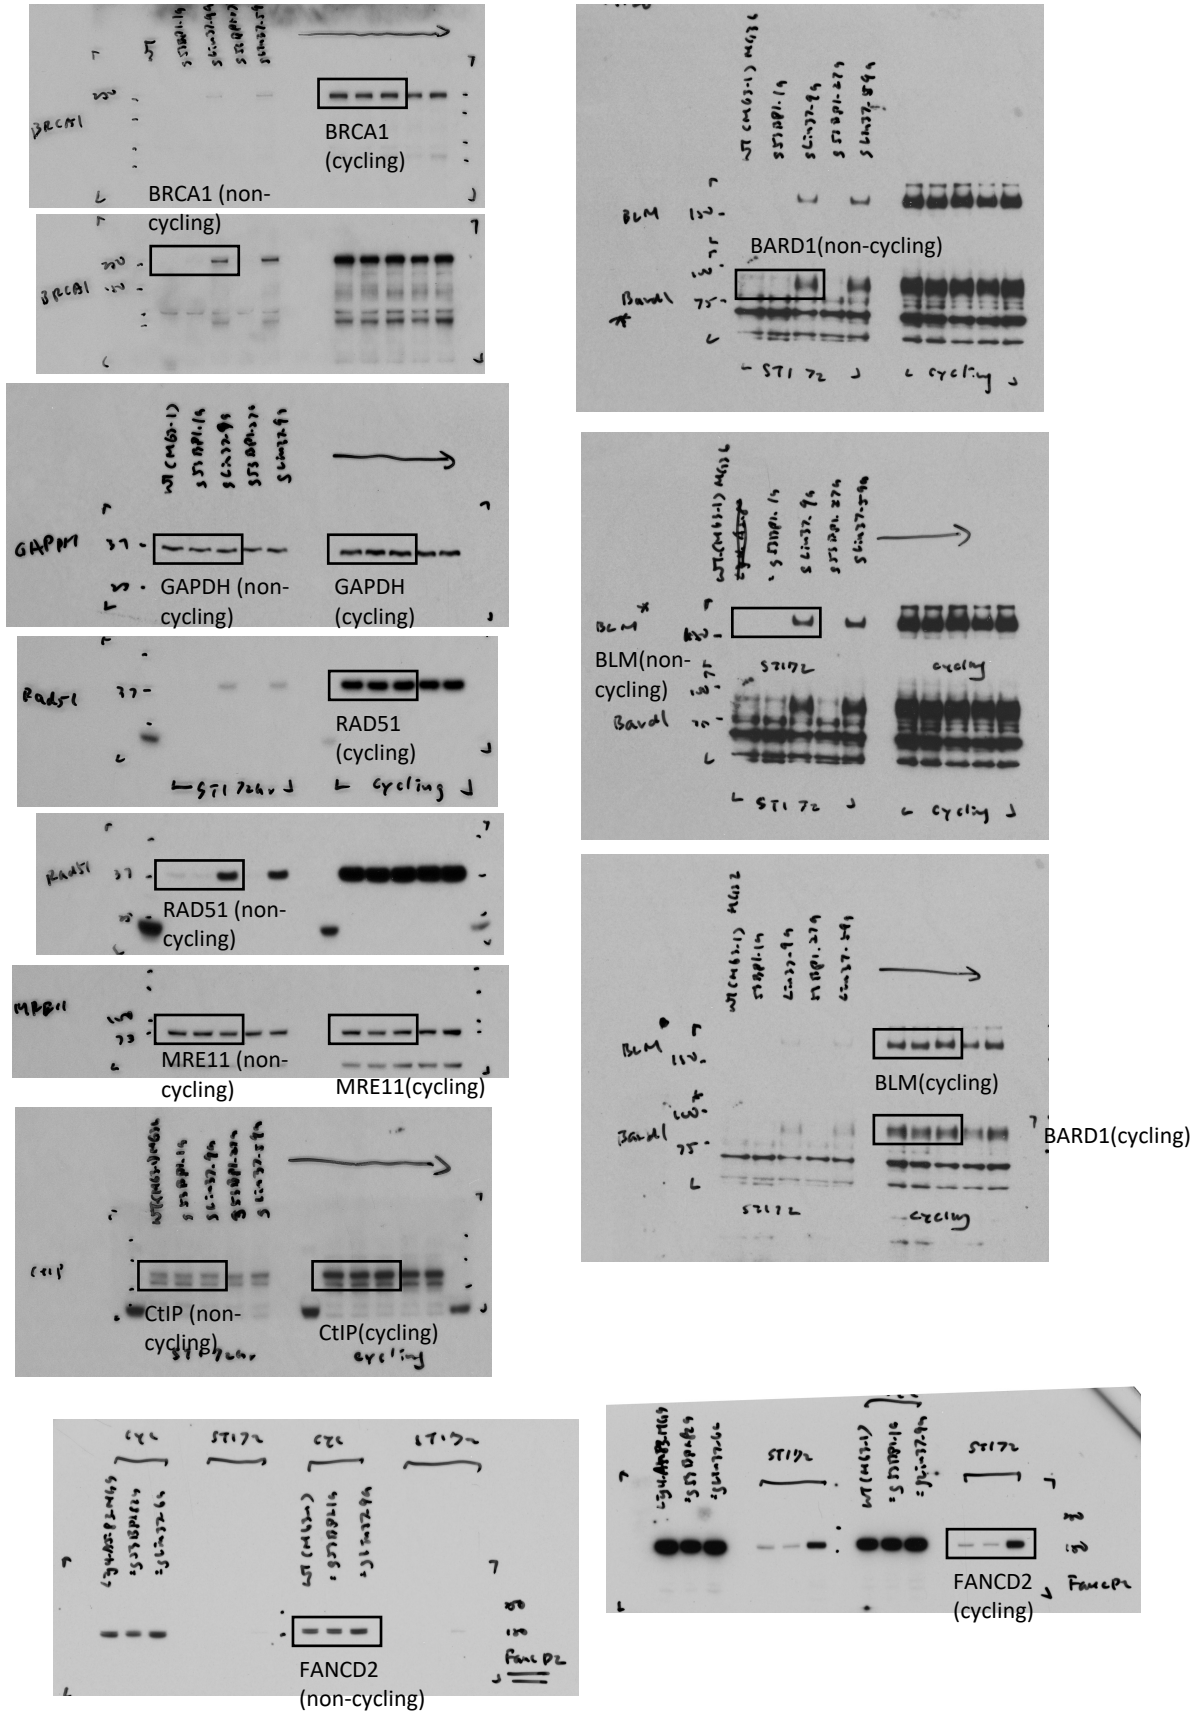

Supplement: elife-68466-data1.pdf [file elife-68466-data1.pdf]
