# Supplementary material for: LIN37-DREAM prevents DNA end resection and homologous recombination at DNA double-strand breaks in quiescent cells
Source: eLife. 2021 Sep 3;10:e68466. doi: 10.7554/eLife.68466 (PMC8416021; doi:10.7554/eLife.68466)
Supplement: Figure 5—source data 1. — GO, gene ontology; RNA-Seq, RNA sequencing. [file elife-68466-fig5-data1.xlsx]

## Sheet: DEgenes_value only
22027	annotated genes								Comparison 1-cycling										minimum	FPKM	log2(FC)		Comparison 2-G1										minimum	FPKM	log2(FC)
									Lig4:Lin37 (L37C)											2	1		Lig4:Lin37(37G1)											2	1
									Lig4(L4LC)							sig		Range				DE genes	Lig4(L4LG1)							sig		Range				DE genes
							Human ortholog			L4LC	L37C					309		10				105		L4LG1	L37G1					608		10				352
Index	test_id	gene_id	gene	locus	Gene description	Gene type	Human gene stable ID	Human gene name	status	value_1	value_2	log2(fold_change)	test_stat	p_value	q_value	significant	avg FPKM	log2(FC)	abs(log2FC)	Num_over_min_FPKM	Num_over_min_log2(FC)	DIFF_EXP	status	value_1	value_2	log2(fold_change)	test_stat	p_value	q_value	significant	avg FPKM	log2(FC)	abs(log2FC)	Num_over_min_FPKM	Num_over_min_log2(FC)	DIFF_EXP
17705	ENSMUSG00000063457	ENSMUSG00000063457	Rps15	10:80292452-80294114	ribosomal protein S15 [Source:MGI Symbol;Acc:MGI:98117]	protein_coding	ENSG00000115268	RPS15	OK	4125.8	3490.52	-0.241232	-1.30779	0.12245	0.57666	no	3808.16	-0.241232	0.241232	2	0	0	OK	1367.97	2035.27	0.573182	3.14123	0.00045	0.0129202	yes	1701.62	0.573182	0.573182	2	0	0
13347	ENSMUSG00000045128	ENSMUSG00000045128	Rpl18a	8:70894721-70897412	ribosomal protein L18A [Source:MGI Symbol;Acc:MGI:1924058]	protein_coding	ENSG00000105640	RPL18A	OK	3666.4	3186.97	-0.202179	-0.988939	0.24645	0.754229	no	3426.68	-0.202179	0.202179	2	0	0	OK	1024.06	1772.89	0.7918	3.91107	5e-05	0.0019768	yes	1398.47	0.7918	0.7918	2	0	0
19160	ENSMUSG00000067288	ENSMUSG00000067288	Rps28	17:33810518-33824562	ribosomal protein S28 [Source:MGI Symbol;Acc:MGI:1859516]	protein_coding	ENSG00000233927	RPS28	OK	1737.17	1561.88	-0.153461	-0.832043	0.3335	0.841777	no	1649.53	-0.153461	0.153461	2	0	0	OK	851.267	1373.6	0.690277	3.67241	5e-05	0.0019768	yes	1112.43	0.690277	0.690277	2	0	0
584	ENSMUSG00000003429	ENSMUSG00000003429	Rps11	7:45121916-45124439	ribosomal protein S11 [Source:MGI Symbol;Acc:MGI:1351329]	protein_coding	ENSG00000142534	RPS11	OK	2703.98	2480.17	-0.124646	-0.657828	0.43165	0.912194	no	2592.07	-0.124646	0.124646	2	0	0	OK	847.165	1348.79	0.670952	3.57234	5e-05	0.0019768	yes	1097.98	0.670952	0.670952	2	0	0
16463	ENSMUSG00000057841	ENSMUSG00000057841	Rpl32	6:115774537-115808747	ribosomal protein L32 [Source:MGI Symbol;Acc:MGI:98038]	protein_coding	none	NA	OK	3644.24	3029.58	-0.266499	-1.44678	0.08565	0.485453	no	3336.91	-0.266499	0.266499	2	0	0	OK	896.505	1346.28	0.586592	3.19505	0.00025	0.00795068	yes	1121.39	0.586592	0.586592	2	0	0
1799	ENSMUSG00000017404	ENSMUSG00000017404	Rpl19	11:98001507-98030492	ribosomal protein L19 [Source:MGI Symbol;Acc:MGI:98020]	protein_coding	none	NA	OK	1841	1708.7	-0.107591	-0.582594	0.48505	0.935798	no	1774.85	-0.107591	0.107591	2	0	0	OK	867.321	1262.57	0.541728	2.77146	0.0012	0.0273763	yes	1064.95	0.541728	0.541728	2	0	0
11060	ENSMUSG00000038274	ENSMUSG00000038274	Fau	19:6057843-6059524	Finkel-Biskis-Reilly murine sarcoma virus (FBR-MuSV) ubiquitously expressed (fox derived) [Source:MGI Symbol;Acc:MGI:102547]	protein_coding	ENSG00000149806	FAU	OK	1845.08	1419.71	-0.378095	-2.06794	0.0151	0.169839	no	1632.39	-0.378095	0.378095	2	0	0	OK	736.936	1187.19	0.687935	3.69422	5e-05	0.0019768	yes	962.063	0.687935	0.687935	2	0	0
9848	ENSMUSG00000034892	ENSMUSG00000034892	Rps29	12:69157721-69159186	ribosomal protein S29 [Source:MGI Symbol;Acc:MGI:107681]	protein_coding	none	NA	OK	2675.89	2317.62	-0.207372	-1.14003	0.17975	0.663134	no	2496.76	-0.207372	0.207372	2	0	0	OK	829.414	1185.56	0.515408	2.78262	0.0011	0.0259231	yes	1007.49	0.515408	0.515408	2	0	0
12384	ENSMUSG00000041841	ENSMUSG00000041841	Rpl37	15:5116644-5119140	ribosomal protein L37 [Source:MGI Symbol;Acc:MGI:1914531]	protein_coding	ENSG00000145592	RPL37	OK	2540.91	2316.98	-0.133097	-0.700011	0.41275	0.900424	no	2428.94	-0.133097	0.133097	2	0	0	OK	645.83	1082.11	0.744623	3.85696	5e-05	0.0019768	yes	863.97	0.744623	0.744623	2	0	0
17148	ENSMUSG00000060938	ENSMUSG00000060938	Rpl26	11:68901582-68906989	ribosomal protein L26 [Source:MGI Symbol;Acc:MGI:106022]	protein_coding	ENSG00000263809	AC135178.2	OK	1846.49	1588.39	-0.217218	-1.19318	0.1636	0.637826	no	1717.44	-0.217218	0.217218	2	0	0	OK	646.669	975.788	0.593541	3.23136	0.0001	0.00364222	yes	811.228	0.593541	0.593541	2	0	0
30933	ENSMUSG00000090137	ENSMUSG00000090137	Uba52	8:70508262-70535328	ubiquitin A-52 residue ribosomal protein fusion product 1 [Source:MGI Symbol;Acc:MGI:98887]	protein_coding	none	NA	OK	1868.77	1601.46	-0.222702	-0.903809	0.2925	0.803656	no	1735.12	-0.222702	0.222702	2	0	0	OK	522.304	936.125	0.841813	2.7574	0.00095	0.0233132	yes	729.215	0.841813	0.841813	2	0	0
1410	ENSMUSG00000012848	ENSMUSG00000012848	Rps5	7:12922289-12926686	ribosomal protein S5 [Source:MGI Symbol;Acc:MGI:1097682]	protein_coding	ENSG00000083845	RPS5	OK	2993.02	2532.86	-0.240836	-1.28138	0.133	0.595546	no	2762.94	-0.240836	0.240836	2	0	0	OK	657.353	921.71	0.487644	2.69154	0.0017	0.035841	yes	789.532	0.487644	0.487644	2	0	0
9325	ENSMUSG00000033379	ENSMUSG00000033379	Atp6v0b	4:117883620-117887333	ATPase, H+ transporting, lysosomal V0 subunit B [Source:MGI Symbol;Acc:MGI:1890510]	protein_coding	ENSG00000117410	ATP6V0B	OK	165.368	176.922	0.0974308	0.458283	0.58505	0.969374	no	171.145	0.0974308	0.0974308	2	0	0	OK	616.55	913.413	0.567049	2.73674	0.00145	0.0317447	yes	764.981	0.567049	0.567049	2	0	0
16467	ENSMUSG00000057863	ENSMUSG00000057863	Rpl36	17:56613415-56614243	ribosomal protein L36 [Source:MGI Symbol;Acc:MGI:1860603]	protein_coding	none	NA	OK	2293.85	1874.29	-0.291431	-1.60434	0.0619	0.408979	no	2084.07	-0.291431	0.291431	2	0	0	OK	534.902	826.074	0.626997	3.29821	5e-05	0.0019768	yes	680.488	0.626997	0.626997	2	0	0
13674	ENSMUSG00000046330	ENSMUSG00000046330	Rpl37a	1:72711289-72713813	ribosomal protein L37a [Source:MGI Symbol;Acc:MGI:98068]	protein_coding	ENSG00000197756	RPL37A	OK	1074.19	976.909	-0.136949	-0.751226	0.383	0.880525	no	1025.55	-0.136949	0.136949	2	0	0	OK	547.332	773.41	0.498817	2.69763	0.0015	0.0325488	yes	660.371	0.498817	0.498817	2	0	0
10881	ENSMUSG00000037894	ENSMUSG00000037894	H2afz	3:137864486-137866922	H2A histone family, member Z [Source:MGI Symbol;Acc:MGI:1888388]	protein_coding	ENSG00000164032	H2AFZ	OK	1195.79	1397.33	0.224713	1.04762	0.2215	0.723974	no	1296.56	0.224713	0.224713	2	0	0	OK	275.166	741.052	1.42927	6.15623	5e-05	0.0019768	yes	508.109	1.42927	1.42927	2	1	1
10762	ENSMUSG00000037563	ENSMUSG00000037563	Rps16	7:28350651-28353155	ribosomal protein S16 [Source:MGI Symbol;Acc:MGI:98118]	protein_coding	ENSG00000105193	RPS16	OK	1827.66	1496.13	-0.288755	-1.55542	0.06725	0.427505	no	1661.89	-0.288755	0.288755	2	0	0	OK	494.481	738.673	0.579022	3.09626	5e-05	0.0019768	yes	616.577	0.579022	0.579022	2	0	0
9747	ENSMUSG00000034634	ENSMUSG00000034634	Ly6d	15:74762055-74763620	lymphocyte antigen 6 complex, locus D [Source:MGI Symbol;Acc:MGI:96881]	protein_coding	ENSG00000167656	LY6D	OK	1.73156	4.61495	1.41424	2.87067	0.0031	0.056564	no	3.17326	1.41424	1.41424	1	1	0	OK	362.942	708.376	0.964775	5.24836	5e-05	0.0019768	yes	535.659	0.964775	0.964775	2	0	0
16354	ENSMUSG00000057322	ENSMUSG00000057322	Rpl38	11:114668523-114672331	ribosomal protein L38 [Source:MGI Symbol;Acc:MGI:1914921]	protein_coding	ENSG00000172809	RPL38	OK	1623.51	1369.59	-0.245375	-1.326	0.11975	0.57124	no	1496.55	-0.245375	0.245375	2	0	0	OK	435.789	645.178	0.566068	2.84575	0.00075	0.0193743	yes	540.484	0.566068	0.566068	2	0	0
2960	ENSMUSG00000021190	ENSMUSG00000021190	Lgmn	12:102394083-102439813	legumain [Source:MGI Symbol;Acc:MGI:1330838]	protein_coding	ENSG00000100600	LGMN	OK	41.5969	37.3835	-0.154075	-0.772657	0.3661	0.868736	no	39.4902	-0.154075	0.154075	2	0	0	OK	281.763	459.185	0.704591	3.84805	5e-05	0.0019768	yes	370.474	0.704591	0.704591	2	0	0
13505	ENSMUSG00000045679	ENSMUSG00000045679	Pqlc3	12:16988647-17000408	PQ loop repeat containing [Source:MGI Symbol;Acc:MGI:2444067]	protein_coding	ENSG00000162976	PQLC3	OK	26.9439	25.2792	-0.0920041	-0.389187	0.62035	0.974147	no	26.1116	-0.0920041	0.0920041	2	0	0	OK	551.811	382.447	-0.528915	-2.68065	0.0011	0.0259231	yes	467.129	-0.528915	0.528915	2	0	0
10851	ENSMUSG00000037805	ENSMUSG00000037805	Rpl10a	17:28326952-28331033	ribosomal protein L10A [Source:MGI Symbol;Acc:MGI:1343877]	protein_coding	ENSG00000198755	RPL10A	OK	1218.03	1085.95	-0.165593	-0.854129	0.31545	0.82539	no	1151.99	-0.165593	0.165593	2	0	0	OK	246.415	356.184	0.531532	2.58607	0.0023	0.0452288	yes	301.3	0.531532	0.531532	2	0	0
114	ENSMUSG00000000682	ENSMUSG00000000682	Cd52	4:134060814-134095082	CD52 antigen [Source:MGI Symbol;Acc:MGI:1346088]	protein_coding	ENSG00000169442	CD52	OK	265.467	348.588	0.39299	1.99704	0.02195	0.218872	no	307.028	0.39299	0.39299	2	0	0	OK	125.16	283.565	1.17991	5.6954	5e-05	0.0019768	yes	204.363	1.17991	1.17991	2	1	1
19020	ENSMUSG00000066551	ENSMUSG00000066551	Hmgb1	5:149046701-149215434	high mobility group box 1 [Source:MGI Symbol;Acc:MGI:96113]	protein_coding	none	NA	OK	617.932	772.613	0.322299	1.35229	0.11465	0.560661	no	695.273	0.322299	0.322299	2	0	0	OK	117.883	279.42	1.24507	4.21207	5e-05	0.0019768	yes	198.651	1.24507	1.24507	2	1	1
8715	ENSMUSG00000032011	ENSMUSG00000032011	Thy1	9:44043383-44048579	thymus cell antigen 1, theta [Source:MGI Symbol;Acc:MGI:98747]	protein_coding	ENSG00000154096	THY1	OK	941.621	2427.41	1.3662	6.14572	5e-05	0.0019768	yes	1684.52	1.3662	1.3662	2	1	1	OK	127.057	259.253	1.02889	4.27655	5e-05	0.0019768	yes	193.155	1.02889	1.02889	2	1	1
17214	ENSMUSG00000061311	ENSMUSG00000061311	Rag1	2:101560780-101649532	recombination activating gene 1 [Source:MGI Symbol;Acc:MGI:97848]	protein_coding	ENSG00000166349	RAG1	OK	0.955378	1.65722	0.794619	2.14344	0.01265	0.150599	no	1.3063	0.794619	0.794619	0	0	0	OK	399.515	257.004	-0.636459	-3.25817	0.0001	0.00364222	yes	328.26	-0.636459	0.636459	2	0	0
5203	ENSMUSG00000025809	ENSMUSG00000025809	Itgb1	8:128685653-128733200	integrin beta 1 (fibronectin receptor beta) [Source:MGI Symbol;Acc:MGI:96610]	protein_coding	ENSG00000150093	ITGB1	OK	94.3652	90.2586	-0.064191	-0.244239	0.76905	0.99264	no	92.3119	-0.064191	0.064191	2	0	0	OK	423.694	256.293	-0.725229	-2.9334	0.0005	0.0140204	yes	339.994	-0.725229	0.725229	2	0	0
2596	ENSMUSG00000020577	ENSMUSG00000020577	Tspan13	12:36014556-36042500	tetraspanin 13 [Source:MGI Symbol;Acc:MGI:1913359]	protein_coding	ENSG00000106537	TSPAN13	OK	104.861	83.1917	-0.333961	-1.78433	0.0339	0.290179	no	94.0264	-0.333961	0.333961	2	0	0	OK	383.879	252.261	-0.605735	-3.2854	5e-05	0.0019768	yes	318.07	-0.605735	0.605735	2	0	0
1155	ENSMUSG00000008193	ENSMUSG00000008193	Spib	7:44525992-44532071	Spi-B transcription factor (Spi-1/PU.1 related) [Source:MGI Symbol;Acc:MGI:892986]	protein_coding	NA	NA	OK	8.63152	26.5349	1.6202	6.79863	5e-05	0.0019768	yes	17.5832	1.6202	1.6202	2	1	1	OK	119.812	247.526	1.04681	5.27558	5e-05	0.0019768	yes	183.669	1.04681	1.04681	2	1	1
8953	ENSMUSG00000032412	ENSMUSG00000032412	Atp1b3	9:96332654-96364442	ATPase, Na+/K+ transporting, beta 3 polypeptide [Source:MGI Symbol;Acc:MGI:107788]	protein_coding	ENSG00000069849	ATP1B3	OK	250.929	283.315	0.175125	0.933456	0.26205	0.770901	no	267.122	0.175125	0.175125	2	0	0	OK	335.161	242.11	-0.469195	-2.48989	0.0025	0.0482205	yes	288.635	-0.469195	0.469195	2	0	0
6483	ENSMUSG00000028081	ENSMUSG00000028081	Rps3a1	3:86137939-86142702	ribosomal protein S3A1 [Source:MGI Symbol;Acc:MGI:1202063]	protein_coding	none	NA	OK	321.535	247.698	-0.376396	-2.04181	0.0174	0.186523	no	284.617	-0.376396	0.376396	2	0	0	OK	150.454	216.704	0.526403	2.79846	0.0012	0.0273763	yes	183.579	0.526403	0.526403	2	0	0
17952	ENSMUSG00000064373	ENSMUSG00000064373	Selenop	15:3268546-3303526	selenoprotein P [Source:MGI Symbol;Acc:MGI:894288]	protein_coding	ENSG00000250722	SELENOP	OK	46.664	37.3559	-0.320972	-1.59817	0.0576	0.390868	no	42.01	-0.320972	0.320972	2	0	0	OK	330.185	210.799	-0.647411	-3.47037	5e-05	0.0019768	yes	270.492	-0.647411	0.647411	2	0	0
9650	ENSMUSG00000034349	ENSMUSG00000034349	Smc4	3:69004737-69034623	structural maintenance of chromosomes 4 [Source:MGI Symbol;Acc:MGI:1917349]	protein_coding	ENSG00000113810	SMC4	OK	222.448	204.374	-0.12226	-0.387912	0.62335	0.974214	no	213.411	-0.12226	0.12226	2	0	0	OK	92.503	208.786	1.17446	3.72013	5e-05	0.0019768	yes	150.644	1.17446	1.17446	2	1	1
6822	ENSMUSG00000028657	ENSMUSG00000028657	Ppt1	4:122836241-122886056	palmitoyl-protein thioesterase 1 [Source:MGI Symbol;Acc:MGI:1298204]	protein_coding	ENSG00000131238	PPT1	OK	61.2037	86.8583	0.505045	1.25827	0.1341	0.596964	no	74.031	0.505045	0.505045	2	0	0	OK	356.054	204.722	-0.79843	-3.08293	0.00035	0.0105257	yes	280.388	-0.79843	0.79843	2	0	0
4669	ENSMUSG00000024776	ENSMUSG00000024776	Stambpl1	19:34192228-34240333	STAM binding protein like 1 [Source:MGI Symbol;Acc:MGI:1923880]	protein_coding	ENSG00000138134	STAMBPL1	OK	85.6579	79.4889	-0.107833	-0.459291	0.58265	0.968674	no	82.5734	-0.107833	0.107833	2	0	0	OK	336.801	203.575	-0.726335	-3.33255	5e-05	0.0019768	yes	270.188	-0.726335	0.726335	2	0	0
8134	ENSMUSG00000031015	ENSMUSG00000031015	Swap70	7:110221710-110283506	SWA-70 protein [Source:MGI Symbol;Acc:MGI:1298390]	protein_coding	ENSG00000133789	SWAP70	OK	36.1804	31.419	-0.203571	-1.02518	0.22125	0.723454	no	33.7997	-0.203571	0.203571	2	0	0	OK	136.713	198.383	0.537134	2.68863	0.00155	0.0333643	yes	167.548	0.537134	0.537134	2	0	0
11526	ENSMUSG00000039395	ENSMUSG00000039395	Mreg	1:72159441-72212307	melanoregulin [Source:MGI Symbol;Acc:MGI:2151839]	protein_coding	ENSG00000118242	MREG	OK	6.06999	6.80409	0.164708	0.60643	0.4788	0.9338	no	6.43704	0.164708	0.164708	2	0	0	OK	114.651	194.093	0.759497	4.15845	5e-05	0.0019768	yes	154.372	0.759497	0.759497	2	0	0
1492	ENSMUSG00000014453	ENSMUSG00000014453	Blk	14:63372835-63417037	B lymphoid kinase [Source:MGI Symbol;Acc:MGI:88169]	protein_coding	ENSG00000136573	BLK	OK	71.2224	75.4317	0.0828414	0.359904	0.65915	0.979768	no	73.327	0.0828414	0.0828414	2	0	0	OK	112.35	191.276	0.767665	3.26115	0.00015	0.00513825	yes	151.813	0.767665	0.767665	2	0	0
426	ENSMUSG00000002395	ENSMUSG00000002395	Use1	8:71366847-71369732	unconventional SNARE in the ER 1 homolog (S. cerevisiae) [Source:MGI Symbol;Acc:MGI:1914273]	protein_coding	ENSG00000053501	USE1	OK	99.8163	84.6708	-0.23741	-1.13554	0.1844	0.671365	no	92.2435	-0.23741	0.23741	2	0	0	OK	132.5	187.634	0.501925	2.56174	0.00245	0.047516	yes	160.067	0.501925	0.501925	2	0	0
686	ENSMUSG00000004266	ENSMUSG00000004266	Ptpn6	6:124720706-124738714	protein tyrosine phosphatase, non-receptor type 6 [Source:MGI Symbol;Acc:MGI:96055]	protein_coding	ENSG00000111679	PTPN6	OK	321.137	301.906	-0.0890874	-0.230776	0.7247	0.990003	no	311.522	-0.0890874	0.0890874	2	0	0	OK	97.6989	185.035	0.921386	3.02332	0.00015	0.00513825	yes	141.367	0.921386	0.921386	2	0	0
4600	ENSMUSG00000024646	ENSMUSG00000024646	Cyb5a	18:84838703-84879871	cytochrome b5 type A (microsomal) [Source:MGI Symbol;Acc:MGI:1926952]	protein_coding	ENSG00000166347	CYB5A	OK	585.178	504.14	-0.21505	-1.17057	0.16865	0.645384	no	544.659	-0.21505	0.21505	2	0	0	OK	285.414	174.168	-0.712579	-3.70245	0.0001	0.00364222	yes	229.791	-0.712579	0.712579	2	0	0
3428	ENSMUSG00000022014	ENSMUSG00000022014	Epsti1	14:77904238-78002657	epithelial stromal interaction 1 (breast) [Source:MGI Symbol;Acc:MGI:1915168]	protein_coding	ENSG00000133106	EPSTI1	OK	44.3572	35.0233	-0.340856	-1.6783	0.0487	0.356363	no	39.6902	-0.340856	0.340856	2	0	0	OK	284.915	171.571	-0.731726	-3.98665	5e-05	0.0019768	yes	228.243	-0.731726	0.731726	2	0	0
5740	ENSMUSG00000026770	ENSMUSG00000026770	Il2ra	2:11642806-11693193	interleukin 2 receptor, alpha chain [Source:MGI Symbol;Acc:MGI:96549]	protein_coding	ENSG00000134460	IL2RA	OK	9.67856	10.1347	0.0664372	0.238817	0.7554	0.99264	no	9.90663	0.0664372	0.0664372	2	0	0	OK	249.453	170.841	-0.546112	-2.4761	0.00065	0.017298	yes	210.147	-0.546112	0.546112	2	0	0
6461	ENSMUSG00000028044	ENSMUSG00000028044	Cks1b	3:89415471-89418383	CDC28 protein kinase 1b [Source:MGI Symbol;Acc:MGI:1889208]	protein_coding	ENSG00000173207	CKS1B	OK	257.974	312.4	0.276169	1.47429	0.0853	0.484345	no	285.187	0.276169	0.276169	2	0	0	OK	18.0202	167.56	3.21699	13.1863	5e-05	0.0019768	yes	92.7901	3.21699	3.21699	2	1	1
19423	ENSMUSG00000068739	ENSMUSG00000068739	Sars	3:108424864-108445209	seryl-aminoacyl-tRNA synthetase [Source:MGI Symbol;Acc:MGI:102809]	protein_coding	ENSG00000031698	SARS	OK	178.243	126.458	-0.495188	-2.60285	0.002	0.0405447	yes	152.351	-0.495188	0.495188	2	0	0	OK	98.8544	163.222	0.723459	3.75138	5e-05	0.0019768	yes	131.038	0.723459	0.723459	2	0	0
986	ENSMUSG00000006360	ENSMUSG00000006360	Crip1	12:113146315-113153879	cysteine-rich protein 1 (intestinal) [Source:MGI Symbol;Acc:MGI:88501]	protein_coding	NA	NA	OK	1722.23	1742.53	0.0169054	0.0924689	0.9147	0.992873	no	1732.38	0.0169054	0.0169054	2	0	0	OK	100.011	157.884	0.658716	2.86643	0.00115	0.026888	yes	128.947	0.658716	0.658716	2	0	0
2549	ENSMUSG00000020484	ENSMUSG00000020484	Xbp1	11:5520658-5525893	X-box binding protein 1 [Source:MGI Symbol;Acc:MGI:98970]	protein_coding	ENSG00000100219	XBP1	OK	262.66	219.952	-0.256007	-1.31019	0.1198	0.571382	no	241.306	-0.256007	0.256007	2	0	0	OK	311.966	156.536	-0.994898	-4.99216	5e-05	0.0019768	yes	234.251	-0.994898	0.994898	2	0	0
4875	ENSMUSG00000025137	ENSMUSG00000025137	Pcyt2	11:120610086-120617936	phosphate cytidylyltransferase 2, ethanolamine [Source:MGI Symbol;Acc:MGI:1915921]	protein_coding	ENSG00000185813	PCYT2	OK	150.293	116.925	-0.362194	-1.61884	0.05855	0.394845	no	133.609	-0.362194	0.362194	2	0	0	OK	95.2652	156.281	0.714123	3.1276	0.0003	0.00925391	yes	125.773	0.714123	0.714123	2	0	0
10270	ENSMUSG00000036181	ENSMUSG00000036181	Hist1h1c	13:23738807-23740367	histone cluster 1, H1c [Source:MGI Symbol;Acc:MGI:1931526]	protein_coding	ENSG00000187837	HIST1H1C	OK	14.6268	5.63687	-1.37564	-4.85858	5e-05	0.0019768	yes	10.1318	-1.37564	1.37564	2	1	1	OK	412.462	150.04	-1.45891	-7.96208	5e-05	0.0019768	yes	281.251	-1.45891	1.45891	2	1	1
10858	ENSMUSG00000037822	ENSMUSG00000037822	Smim14	5:65413220-65537184	small integral membrane protein 14 [Source:MGI Symbol;Acc:MGI:1915802]	protein_coding	ENSG00000163683	SMIM14	OK	93.5824	71.5262	-0.387765	-1.21539	0.1416	0.602064	no	82.5543	-0.387765	0.387765	2	0	0	OK	82.0884	136.42	0.7328	2.73778	0.00145	0.0317447	yes	109.254	0.7328	0.7328	2	0	0
10664	ENSMUSG00000037313	ENSMUSG00000037313	Tacc3	5:33634951-33678995	transforming, acidic coiled-coil containing protein 3 [Source:MGI Symbol;Acc:MGI:1341163]	protein_coding	ENSG00000013810	TACC3	OK	161.831	164.435	0.0230296	0.0748234	0.92995	0.993228	no	163.133	0.0230296	0.0230296	2	0	0	OK	15.7881	134.486	3.09055	5.75925	5e-05	0.0019768	yes	75.137	3.09055	3.09055	2	1	1
15784	ENSMUSG00000054693	ENSMUSG00000054693	Adam10	9:70678996-70780229	a disintegrin and metallopeptidase domain 10 [Source:MGI Symbol;Acc:MGI:109548]	protein_coding	ENSG00000137845	ADAM10	OK	31.6737	38.5421	0.283149	1.44125	0.0787	0.464445	no	35.1079	0.283149	0.283149	2	0	0	OK	189.109	131.937	-0.519371	-2.75682	0.00085	0.0213895	yes	160.523	-0.519371	0.519371	2	0	0
9778	ENSMUSG00000034708	ENSMUSG00000034708	Grn	11:102430314-102447682	granulin [Source:MGI Symbol;Acc:MGI:95832]	protein_coding	ENSG00000030582	GRN	OK	31.045	29.828	-0.0576936	-0.218307	0.79715	0.992781	no	30.4365	-0.0576936	0.0576936	2	0	0	OK	53.2548	125.784	1.23996	5.19967	5e-05	0.0019768	yes	89.5194	1.23996	1.23996	2	1	1
7566	ENSMUSG00000029910	ENSMUSG00000029910	Mad2l1	6:66535389-66547220	MAD2 mitotic arrest deficient-like 1 [Source:MGI Symbol;Acc:MGI:1860374]	protein_coding	ENSG00000164109	MAD2L1	OK	102.868	106.39	0.0485716	0.0757498	0.91795	0.993025	no	104.629	0.0485716	0.0485716	2	0	0	OK	21.2724	125.576	2.56151	5.89226	5e-05	0.0019768	yes	73.4242	2.56151	2.56151	2	1	1
7956	ENSMUSG00000030677	ENSMUSG00000030677	Kif22	7:127027728-127042471	kinesin family member 22 [Source:MGI Symbol;Acc:MGI:109233]	protein_coding	ENSG00000079616	KIF22	OK	157.465	166.993	0.0847597	0.219748	0.7936	0.992781	no	162.229	0.0847597	0.0847597	2	0	0	OK	8.46352	122.411	3.85433	6.64627	5e-05	0.0019768	yes	65.4373	3.85433	3.85433	2	1	1
4607	ENSMUSG00000024660	ENSMUSG00000024660	Incenp	19:9872295-9899551	inner centromere protein [Source:MGI Symbol;Acc:MGI:1313288]	protein_coding	ENSG00000149503	INCENP	OK	188.808	234.736	0.314119	1.07342	0.1958	0.688951	no	211.772	0.314119	0.314119	2	0	0	OK	18.9773	119.552	2.65528	7.85995	5e-05	0.0019768	yes	69.2647	2.65528	2.65528	2	1	1
9036	ENSMUSG00000032555	ENSMUSG00000032555	Topbp1	9:103305214-103350428	topoisomerase (DNA) II binding protein 1 [Source:MGI Symbol;Acc:MGI:1920018]	protein_coding	ENSG00000163781	TOPBP1	OK	146.568	143.121	-0.0343414	-0.0945533	0.90845	0.992805	no	144.845	-0.0343414	0.0343414	2	0	0	OK	45.9332	118.748	1.37029	3.6285	5e-05	0.0019768	yes	82.3406	1.37029	1.37029	2	1	1
11771	ENSMUSG00000040084	ENSMUSG00000040084	Bub1b	2:118598210-118641591	BUB1B, mitotic checkpoint serine/threonine kinase [Source:MGI Symbol;Acc:MGI:1333889]	protein_coding	ENSG00000156970	BUB1B	OK	79.5402	112.055	0.494454	1.85657	0.0257	0.242628	no	95.7976	0.494454	0.494454	2	0	0	OK	8.65094	118.58	3.77686	7.77346	5e-05	0.0019768	yes	63.6155	3.77686	3.77686	2	1	1
49	ENSMUSG00000000278	ENSMUSG00000000278	Scpep1	11:88905927-88955465	serine carboxypeptidase 1 [Source:MGI Symbol;Acc:MGI:1921867]	protein_coding	ENSG00000121064	SCPEP1	OK	40.285	39.3996	-0.0320613	-0.161867	0.84865	0.992781	no	39.8423	-0.0320613	0.0320613	2	0	0	OK	76.0769	117.009	0.621086	3.3443	0.0001	0.00364222	yes	96.5429	0.621086	0.621086	2	0	0
12391	ENSMUSG00000041859	ENSMUSG00000041859	Mcm3	1:20802967-20820312	minichromosome maintenance complex component 3 [Source:MGI Symbol;Acc:MGI:101845]	protein_coding	ENSG00000112118	MCM3	OK	167.011	224.561	0.427162	1.54235	0.07105	0.440204	no	195.786	0.427162	0.427162	2	0	0	OK	33.8677	112.858	1.73653	5.96101	5e-05	0.0019768	yes	73.3629	1.73653	1.73653	2	1	1
10426	ENSMUSG00000036678	ENSMUSG00000036678	Aaas	15:102338251-102350771	achalasia, adrenocortical insufficiency, alacrimia [Source:MGI Symbol;Acc:MGI:2443767]	protein_coding	ENSG00000094914	AAAS	OK	96.5103	97.3571	0.0126035	0.037413	0.9635	0.995047	no	96.9337	0.0126035	0.0126035	2	0	0	OK	44.4668	104.815	1.23705	3.45426	5e-05	0.0019768	yes	74.6409	1.23705	1.23705	2	1	1
5025	ENSMUSG00000025403	ENSMUSG00000025403	Shmt2	10:127514966-127522444	serine hydroxymethyltransferase 2 (mitochondrial) [Source:MGI Symbol;Acc:MGI:1277989]	protein_coding	ENSG00000182199	SHMT2	OK	322.652	350.223	0.118295	0.432177	0.60105	0.972945	no	336.438	0.118295	0.118295	2	0	0	OK	54.8012	104.001	0.924314	3.20934	5e-05	0.0019768	yes	79.4011	0.924314	0.924314	2	0	0
10477	ENSMUSG00000036845	ENSMUSG00000036845	Lin37	7:30539133-30559838	lin-37 homolog (C. elegans) [Source:MGI Symbol;Acc:MGI:1922910]	protein_coding	ENSG00000267796	LIN37	OK	39.0634	41.3126	0.0807632	0.180213	0.83145	0.992781	no	40.188	0.0807632	0.0807632	2	0	0	OK	43.6478	101.793	1.22166	2.85556	0.0016	0.0341927	yes	72.7204	1.22166	1.22166	2	1	1
19131	ENSMUSG00000067149	ENSMUSG00000067149	Jchain	5:88519808-88527891	immunoglobulin joining chain [Source:MGI Symbol;Acc:MGI:96493]	protein_coding	ENSG00000132465	JCHAIN	OK	87.2276	175.213	1.00625	5.12758	5e-05	0.0019768	yes	131.22	1.00625	1.00625	2	1	1	OK	185.636	101.15	-0.875978	-4.57019	5e-05	0.0019768	yes	143.393	-0.875978	0.875978	2	0	0
9587	ENSMUSG00000034192	ENSMUSG00000034192	Lsm3	6:91515927-91532379	LSM3 homolog, U6 small nuclear RNA and mRNA degradation associated [Source:MGI Symbol;Acc:MGI:1914928]	protein_coding	ENSG00000170860	LSM3	OK	175.732	200.173	0.187874	0.961031	0.2538	0.762442	no	187.952	0.187874	0.187874	2	0	0	OK	38.3311	99.722	1.3794	5.77935	5e-05	0.0019768	yes	69.0266	1.3794	1.3794	2	1	1
16145	ENSMUSG00000056367	ENSMUSG00000056367	Actr3b	5:25759996-25850688	ARP3 actin-related protein 3B [Source:MGI Symbol;Acc:MGI:2661120]	protein_coding	NA	NA	OK	155.419	182.999	0.235672	0.865988	0.2975	0.807851	no	169.209	0.235672	0.235672	2	0	0	OK	52.6792	98.288	0.899783	3.32163	0.00015	0.00513825	yes	75.4836	0.899783	0.899783	2	0	0
10900	ENSMUSG00000037944	ENSMUSG00000037944	Ccr7	11:99144195-99155077	chemokine (C-C motif) receptor 7 [Source:MGI Symbol;Acc:MGI:103011]	protein_coding	ENSG00000126353	CCR7	OK	11.9714	10.905	-0.134605	-0.548745	0.52285	0.950348	no	11.4382	-0.134605	0.134605	2	0	0	OK	41.2264	96.2562	1.22331	6.3776	5e-05	0.0019768	yes	68.7413	1.22331	1.22331	2	1	1
841	ENSMUSG00000005410	ENSMUSG00000005410	Mcm5	8:75109568-75128439	minichromosome maintenance complex component 5 [Source:MGI Symbol;Acc:MGI:103197]	protein_coding	ENSG00000100297	MCM5	OK	106.881	155.691	0.542685	2.37393	0.00465	0.0759316	no	131.286	0.542685	0.542685	2	0	0	OK	6.72546	95.0673	3.82125	12.6071	5e-05	0.0019768	yes	50.8964	3.82125	3.82125	2	1	1
4270	ENSMUSG00000024056	ENSMUSG00000024056	Ndc80	17:71496099-71526857	NDC80 kinetochore complex component [Source:MGI Symbol;Acc:MGI:1914302]	protein_coding	ENSG00000080986	NDC80	OK	50.6317	46.2714	-0.129918	-0.634335	0.45625	0.926098	no	48.4515	-0.129918	0.129918	2	0	0	OK	17.0127	93.7792	2.46266	11.4089	5e-05	0.0019768	yes	55.3959	2.46266	2.46266	2	1	1
15946	ENSMUSG00000055447	ENSMUSG00000055447	Cd47	16:49800532-49915010	CD47 antigen (Rh-related antigen, integrin-associated signal transducer) [Source:MGI Symbol;Acc:MGI:96617]	protein_coding	ENSG00000196776	CD47	OK	127.4	148.726	0.223283	0.917599	0.27995	0.790999	no	138.063	0.223283	0.223283	2	0	0	OK	160.801	92.3634	-0.799887	-3.24983	0.00025	0.00795068	yes	126.582	-0.799887	0.799887	2	0	0
6644	ENSMUSG00000028381	ENSMUSG00000028381	Ugcg	4:59189256-59222833	UDP-glucose ceramide glucosyltransferase [Source:MGI Symbol;Acc:MGI:1332243]	protein_coding	ENSG00000148154	UGCG	OK	18.4105	19.2369	0.0633465	0.309726	0.71045	0.987697	no	18.8237	0.0633465	0.0633465	2	0	0	OK	157.69	92.3607	-0.771736	-4.03155	5e-05	0.0019768	yes	125.025	-0.771736	0.771736	2	0	0
10519	ENSMUSG00000036931	ENSMUSG00000036931	Nfkbid	7:30421731-30428746	nuclear factor of kappa light polypeptide gene enhancer in B cells inhibitor, delta [Source:MGI Symbol;Acc:MGI:3041243]	protein_coding	ENSG00000167604	AD000864.1	OK	8.78861	8.88271	0.0153644	0.0529075	0.9493	0.994219	no	8.83566	0.0153644	0.0153644	2	0	0	OK	51.182	90.6373	0.824469	3.39263	5e-05	0.0019768	yes	70.9096	0.824469	0.824469	2	0	0
406	ENSMUSG00000002297	ENSMUSG00000002297	Dbf4	5:8396972-8422716	DBF4 zinc finger [Source:MGI Symbol;Acc:MGI:1351328]	protein_coding	ENSG00000006634	DBF4	OK	75.4815	81.8932	0.117622	0.570271	0.4861	0.936383	no	78.6873	0.117622	0.117622	2	0	0	OK	49.1326	89.9423	0.872321	4.25167	5e-05	0.0019768	yes	69.5375	0.872321	0.872321	2	0	0
2502	ENSMUSG00000020415	ENSMUSG00000020415	Pttg1	11:43420249-43426251	pituitary tumor-transforming gene 1 [Source:MGI Symbol;Acc:MGI:1353578]	protein_coding	NA	NA	OK	149.785	133.686	-0.164038	-0.805055	0.3439	0.851382	no	141.736	-0.164038	0.164038	2	0	0	OK	33.3235	89.2331	1.42104	5.84654	5e-05	0.0019768	yes	61.2783	1.42104	1.42104	2	1	1
5045	ENSMUSG00000025433	ENSMUSG00000025433	Crisp3	17:40221776-40242288	cysteine-rich secretory protein 3 [Source:MGI Symbol;Acc:MGI:102552]	protein_coding	NA	NA	OK	21.5228	21.2543	-0.0181148	-0.0769401	0.9301	0.993228	no	21.3886	-0.0181148	0.0181148	2	0	0	OK	59.5243	89.1841	0.583306	2.9662	0.0004	0.0117599	yes	74.3542	0.583306	0.583306	2	0	0
19634	ENSMUSG00000069910	ENSMUSG00000069910	Spdl1	11:34809189-34833641	spindle apparatus coiled-coil protein 1 [Source:MGI Symbol;Acc:MGI:1917635]	protein_coding	ENSG00000040275	SPDL1	OK	22.4765	28.1614	0.325304	1.31044	0.11955	0.571053	no	25.319	0.325304	0.325304	2	0	0	OK	16.8969	88.8416	2.39448	9.62982	5e-05	0.0019768	yes	52.8693	2.39448	2.39448	2	1	1
9721	ENSMUSG00000034563	ENSMUSG00000034563	Ccpg1	9:72958784-73042779	cell cycle progression 1 [Source:MGI Symbol;Acc:MGI:1196419]	protein_coding	ENSG00000260916	CCPG1	OK	6.98412	7.37549	0.07866	0.188389	0.80045	0.992781	no	7.1798	0.07866	0.07866	2	0	0	OK	134.446	87.4828	-0.619954	-2.83751	0.00045	0.0129202	yes	110.964	-0.619954	0.619954	2	0	0
11049	ENSMUSG00000038252	ENSMUSG00000038252	Ncapd2	6:125168006-125191701	non-SMC condensin I complex, subunit D2 [Source:MGI Symbol;Acc:MGI:1915548]	protein_coding	ENSG00000010292	NCAPD2	OK	252.214	257.767	0.0314168	0.096559	0.9086	0.992805	no	254.99	0.0314168	0.0314168	2	0	0	OK	11.8909	85.6402	2.84843	7.03061	5e-05	0.0019768	yes	48.7655	2.84843	2.84843	2	1	1
754	ENSMUSG00000004791	ENSMUSG00000004791	Pgf	12:85166634-85177790	placental growth factor [Source:MGI Symbol;Acc:MGI:105095]	protein_coding	ENSG00000119630	PGF	OK	7.49687	6.13378	-0.289512	-0.927354	0.27595	0.787165	no	6.81532	-0.289512	0.289512	2	0	0	OK	125.849	84.809	-0.569407	-2.94567	0.0006	0.016251	yes	105.329	-0.569407	0.569407	2	0	0
11222	ENSMUSG00000038644	ENSMUSG00000038644	Pold1	7:44532745-44548849	polymerase (DNA directed), delta 1, catalytic subunit [Source:MGI Symbol;Acc:MGI:97741]	protein_coding	ENSG00000062822	POLD1	OK	119.703	108.394	-0.143178	-0.477061	0.57525	0.966762	no	114.049	-0.143178	0.143178	2	0	0	OK	36.0347	81.8594	1.18376	3.8223	5e-05	0.0019768	yes	58.947	1.18376	1.18376	2	1	1
11239	ENSMUSG00000038685	ENSMUSG00000038685	Rtel1	2:181319738-181356616	regulator of telomere elongation helicase 1 [Source:MGI Symbol;Acc:MGI:2139369]	protein_coding	ENSG00000258366	RTEL1	OK	60.3682	73.8405	0.290623	0.870562	0.3077	0.817664	no	67.1044	0.290623	0.290623	2	0	0	OK	30.1563	80.9542	1.42465	4.12602	5e-05	0.0019768	yes	55.5553	1.42465	1.42465	2	1	1
31622	ENSMUSG00000091625	ENSMUSG00000091625	Lsm5	6:56701062-56704710	LSM5 homolog, U6 small nuclear RNA and mRNA degradation associated [Source:MGI Symbol;Acc:MGI:1913623]	protein_coding	ENSG00000106355	LSM5	OK	156.803	163.205	0.0577331	0.224744	0.79335	0.992781	no	160.004	0.0577331	0.0577331	2	0	0	OK	43.8633	80.4034	0.874242	2.68645	0.00185	0.0383021	yes	62.1334	0.874242	0.874242	2	0	0
6754	ENSMUSG00000028557	ENSMUSG00000028557	Rnf11	4:109451097-109484728	ring finger protein 11 [Source:MGI Symbol;Acc:MGI:1352759]	protein_coding	ENSG00000123091	RNF11	OK	17.2386	15.2311	-0.17862	-0.775706	0.3671	0.869518	no	16.2349	-0.17862	0.17862	2	0	0	OK	113.539	79.5995	-0.512361	-2.60744	0.00255	0.0488675	yes	96.5693	-0.512361	0.512361	2	0	0
11482	ENSMUSG00000039264	ENSMUSG00000039264	Gimap3	6:48764463-48770851	GTPase, IMAP family member 3 [Source:MGI Symbol;Acc:MGI:1932723]	protein_coding	ENSG00000196329	GIMAP5	OK	33.8107	34.5521	0.0312958	0.157626	0.8476	0.992781	no	34.1814	0.0312958	0.0312958	2	0	0	OK	52.3484	79.4921	0.602665	3.16621	0.0002	0.00660246	yes	65.9202	0.602665	0.602665	2	0	0
8843	ENSMUSG00000032254	ENSMUSG00000032254	Kif23	9:61915904-61946774	kinesin family member 23 [Source:MGI Symbol;Acc:MGI:1919069]	protein_coding	ENSG00000137807	KIF23	OK	150.953	134.451	-0.167013	-0.538181	0.5365	0.954832	no	142.702	-0.167013	0.167013	2	0	0	OK	10.2847	78.6542	2.93502	6.53897	5e-05	0.0019768	yes	44.4695	2.93502	2.93502	2	1	1
7145	ENSMUSG00000029177	ENSMUSG00000029177	Cenpa	5:30666776-30674830	centromere protein A [Source:MGI Symbol;Acc:MGI:88375]	protein_coding	ENSG00000115163	CENPA	OK	302.475	245.563	-0.300722	-1.44414	0.0832	0.478294	no	274.019	-0.300722	0.300722	2	0	0	OK	20.4332	78.2708	1.93756	8.02132	5e-05	0.0019768	yes	49.352	1.93756	1.93756	2	1	1
8924	ENSMUSG00000032373	ENSMUSG00000032373	Car12	9:66713685-66766845	carbonic anhydrase 12 [Source:MGI Symbol;Acc:MGI:1923709]	protein_coding	ENSG00000074410	CA12	OK	22.8982	17.8234	-0.361465	-1.72963	0.03965	0.319476	no	20.3608	-0.361465	0.361465	2	0	0	OK	46.0522	76.7766	0.737398	3.69952	0.0001	0.00364222	yes	61.4144	0.737398	0.737398	2	0	0
15789	ENSMUSG00000054717	ENSMUSG00000054717	Hmgb2	8:57511906-57515999	high mobility group box 2 [Source:MGI Symbol;Acc:MGI:96157]	protein_coding	ENSG00000164104	HMGB2	OK	438.931	513.412	0.226122	0.681221	0.42825	0.910293	no	476.172	0.226122	0.226122	2	0	0	OK	26.1939	75.2149	1.52178	3.95875	5e-05	0.0019768	yes	50.7044	1.52178	1.52178	2	1	1
2820	ENSMUSG00000020914	ENSMUSG00000020914	Top2a	11:98992942-99024189	topoisomerase (DNA) II alpha [Source:MGI Symbol;Acc:MGI:98790]	protein_coding	ENSG00000131747	TOP2A	OK	455.764	425.35	-0.0996349	-0.339854	0.68675	0.984463	no	440.557	-0.0996349	0.0996349	2	0	0	OK	4.41698	73.6529	4.05961	10.5799	5e-05	0.0019768	yes	39.0349	4.05961	4.05961	2	1	1
3999	ENSMUSG00000022978	ENSMUSG00000022978	Mis18a	16:90719311-90727404	MIS18 kinetochore protein A [Source:MGI Symbol;Acc:MGI:1913828]	protein_coding	ENSG00000159055	MIS18A	OK	37.3793	48.0912	0.363533	1.64821	0.05165	0.365941	no	42.7353	0.363533	0.363533	2	0	0	OK	15.2412	72.7419	2.25481	9.11327	5e-05	0.0019768	yes	43.9916	2.25481	2.25481	2	1	1
12589	ENSMUSG00000042460	ENSMUSG00000042460	C1galt1	6:7844841-7875687	core 1 synthase, glycoprotein-N-acetylgalactosamine 3-beta-galactosyltransferase, 1 [Source:MGI Symbol;Acc:MGI:2151071]	protein_coding	ENSG00000106392	C1GALT1	OK	21.4041	23.1638	0.113983	0.603512	0.47995	0.93459	no	22.2839	0.113983	0.113983	2	0	0	OK	102.387	71.3536	-0.520976	-2.86742	0.0005	0.0140204	yes	86.8703	-0.520976	0.520976	2	0	0
2708	ENSMUSG00000020739	ENSMUSG00000020739	Nup85	11:115564433-115583985	nucleoporin 85 [Source:MGI Symbol;Acc:MGI:3046173]	protein_coding	ENSG00000125450	NUP85	OK	122.756	150.7	0.295891	1.21768	0.1525	0.616491	no	136.728	0.295891	0.295891	2	0	0	OK	38.2293	69.4894	0.862115	3.02707	0.00055	0.0151958	yes	53.8594	0.862115	0.862115	2	0	0
9798	ENSMUSG00000034765	ENSMUSG00000034765	Dusp5	19:53528608-53542431	dual specificity phosphatase 5 [Source:MGI Symbol;Acc:MGI:2685183]	protein_coding	ENSG00000138166	DUSP5	OK	107.098	73.4826	-0.543455	-2.92082	0.00045	0.0129202	yes	90.2903	-0.543455	0.543455	2	0	0	OK	107.912	69.4874	-0.635033	-3.42459	0.0001	0.00364222	yes	88.6997	-0.635033	0.635033	2	0	0
2805	ENSMUSG00000020897	ENSMUSG00000020897	Aurkb	11:69045646-69051664	aurora kinase B [Source:MGI Symbol;Acc:MGI:107168]	protein_coding	ENSG00000178999	AURKB	OK	154.381	161.408	0.0642165	0.22342	0.79415	0.992781	no	157.894	0.0642165	0.0642165	2	0	0	OK	3.57401	69.4581	4.28052	9.44464	5e-05	0.0019768	yes	36.5161	4.28052	4.28052	2	1	1
5139	ENSMUSG00000025630	ENSMUSG00000025630	Hprt	X:52988136-53021659	hypoxanthine guanine phosphoribosyl transferase [Source:MGI Symbol;Acc:MGI:96217]	protein_coding	ENSG00000165704	HPRT1	OK	232.176	209.535	-0.14803	-0.806865	0.3463	0.852495	no	220.856	-0.14803	0.14803	2	0	0	OK	107.012	69.2532	-0.627817	-3.23862	0.0002	0.00660246	yes	88.1326	-0.627817	0.627817	2	0	0
1085	ENSMUSG00000007050	ENSMUSG00000007050	Lsm2	17:34981861-34985891	LSM2 homolog, U6 small nuclear RNA and mRNA degradation associated [Source:MGI Symbol;Acc:MGI:90676]	protein_coding	ENSG00000204392	LSM2	OK	131.662	158.766	0.27006	1.11792	0.19685	0.690707	no	145.214	0.27006	0.27006	2	0	0	OK	28.3823	68.7791	1.27698	4.31706	5e-05	0.0019768	yes	48.5807	1.27698	1.27698	2	1	1
8916	ENSMUSG00000032359	ENSMUSG00000032359	Ctsh	9:90054151-90076089	cathepsin H [Source:MGI Symbol;Acc:MGI:107285]	protein_coding	ENSG00000103811	CTSH	OK	45.699	61.1373	0.419892	1.6114	0.05555	0.382337	no	53.4181	0.419892	0.419892	2	0	0	OK	40.6718	67.7116	0.735374	2.72358	0.00145	0.0317447	yes	54.1917	0.735374	0.735374	2	0	0
4684	ENSMUSG00000024795	ENSMUSG00000024795	Kif20b	19:34922360-34975745	kinesin family member 20B [Source:MGI Symbol;Acc:MGI:2444576]	protein_coding	ENSG00000138182	KIF20B	OK	63.3189	52.3274	-0.275069	-0.769684	0.3685	0.870386	no	57.8231	-0.275069	0.275069	2	0	0	OK	12.9776	67.6453	2.38197	5.70465	5e-05	0.0019768	yes	40.3115	2.38197	2.38197	2	1	1
1582	ENSMUSG00000015312	ENSMUSG00000015312	Gadd45b	10:80930072-80932204	growth arrest and DNA-damage-inducible 45 beta [Source:MGI Symbol;Acc:MGI:107776]	protein_coding	ENSG00000099860	GADD45B	OK	19.0913	18.6413	-0.0344113	-0.128202	0.8784	0.992781	no	18.8663	-0.0344113	0.0344113	2	0	0	OK	37.7983	65.6869	0.797284	3.616	5e-05	0.0019768	yes	51.7426	0.797284	0.797284	2	0	0
3700	ENSMUSG00000022468	ENSMUSG00000022468	Endou	15:97711014-97731339	endonuclease, polyU-specific [Source:MGI Symbol;Acc:MGI:97746]	protein_coding	ENSG00000111405	ENDOU	OK	51.4855	45.3892	-0.181818	-0.943172	0.2733	0.784046	no	48.4374	-0.181818	0.181818	2	0	0	OK	43.013	63.1123	0.55315	2.82773	0.00055	0.0151958	yes	53.0626	0.55315	0.55315	2	0	0
2224	ENSMUSG00000019942	ENSMUSG00000019942	Cdk1	10:69335145-69352938	cyclin-dependent kinase 1 [Source:MGI Symbol;Acc:MGI:88351]	protein_coding	ENSG00000170312	CDK1	OK	264.434	227.092	-0.219633	-0.790749	0.3451	0.852081	no	245.763	-0.219633	0.219633	2	0	0	OK	6.28482	62.9285	3.32377	7.36495	5e-05	0.0019768	yes	34.6067	3.32377	3.32377	2	1	1
8944	ENSMUSG00000032400	ENSMUSG00000032400	Zwilch	9:64117146-64173104	zwilch kinetochore protein [Source:MGI Symbol;Acc:MGI:1915264]	protein_coding	ENSG00000174442	ZWILCH	OK	50.9558	53.9712	0.0829449	0.237804	0.77825	0.99264	no	52.4635	0.0829449	0.0829449	2	0	0	OK	4.32935	62.6983	3.8562	8.25243	5e-05	0.0019768	yes	33.5138	3.8562	3.8562	2	1	1
9388	ENSMUSG00000033589	ENSMUSG00000033589	Reep4	14:70545250-70548933	receptor accessory protein 4 [Source:MGI Symbol;Acc:MGI:1919799]	protein_coding	ENSG00000168476	REEP4	OK	71.9104	54.7548	-0.393214	-1.25596	0.13405	0.596909	no	63.3326	-0.393214	0.393214	2	0	0	OK	31.2854	61.9546	0.98572	3.0896	0.0001	0.00364222	yes	46.62	0.98572	0.98572	2	0	0
4291	ENSMUSG00000024085	ENSMUSG00000024085	Man2a1	17:64600735-64755110	mannosidase 2, alpha 1 [Source:MGI Symbol;Acc:MGI:104669]	protein_coding	ENSG00000112893	MAN2A1	OK	9.31029	13.7781	0.565483	2.5124	0.0022	0.0437041	yes	11.5442	0.565483	0.565483	2	0	0	OK	99.8323	61.2933	-0.703778	-3.26111	5e-05	0.0019768	yes	80.5628	-0.703778	0.703778	2	0	0
11340	ENSMUSG00000038943	ENSMUSG00000038943	Prc1	7:80293228-80324454	protein regulator of cytokinesis 1 [Source:MGI Symbol;Acc:MGI:1858961]	protein_coding	ENSG00000198901	PRC1	OK	70.9221	79.3904	0.16273	0.471818	0.45045	0.923287	no	75.1562	0.16273	0.16273	2	0	0	OK	7.6469	61.1144	2.99856	5.43622	5e-05	0.0019768	yes	34.3807	2.99856	2.99856	2	1	1
592	ENSMUSG00000003464	ENSMUSG00000003464	Pex19	1:172126754-172136493	peroxisomal biogenesis factor 19 [Source:MGI Symbol;Acc:MGI:1334458]	protein_coding	ENSG00000162735	PEX19	OK	32.061	30.3391	-0.0796387	-0.244293	0.75875	0.99264	no	31.2	-0.0796387	0.0796387	2	0	0	OK	28.3144	60.14	1.08679	3.37518	5e-05	0.0019768	yes	44.2272	1.08679	1.08679	2	1	1
269	ENSMUSG00000001517	ENSMUSG00000001517	Foxm1	6:128362966-128424931	forkhead box M1 [Source:MGI Symbol;Acc:MGI:1347487]	protein_coding	ENSG00000111206	FOXM1	OK	60.9202	73.6077	0.272937	0.816847	0.2877	0.798996	no	67.2639	0.272937	0.272937	2	0	0	OK	11.9056	59.9441	2.33197	4.82089	5e-05	0.0019768	yes	35.9248	2.33197	2.33197	2	1	1
2925	ENSMUSG00000021115	ENSMUSG00000021115	Vrk1	12:106010227-106077426	vaccinia related kinase 1 [Source:MGI Symbol;Acc:MGI:1261847]	protein_coding	ENSG00000100749	VRK1	OK	83.807	95.2963	0.185349	0.945546	0.2642	0.773621	no	89.5516	0.185349	0.185349	2	0	0	OK	38.6423	59.9326	0.63316	3.05072	0.0005	0.0140204	yes	49.2874	0.63316	0.63316	2	0	0
2233	ENSMUSG00000019961	ENSMUSG00000019961	Tmpo	10:91147570-91181315	thymopoietin [Source:MGI Symbol;Acc:MGI:106920]	protein_coding	ENSG00000120802	TMPO	OK	232.695	254.779	0.130801	0.468367	0.57935	0.967552	no	243.737	0.130801	0.130801	2	0	0	OK	25.9756	59.0988	1.18597	3.85321	5e-05	0.0019768	yes	42.5372	1.18597	1.18597	2	1	1
7490	ENSMUSG00000029730	ENSMUSG00000029730	Mcm7	5:138161070-138187451	minichromosome maintenance complex component 7 [Source:MGI Symbol;Acc:MGI:1298398]	protein_coding	ENSG00000166508	MCM7	OK	94.2494	140.334	0.574306	1.99529	0.014	0.161063	no	117.292	0.574306	0.574306	2	0	0	OK	22.4782	58.4283	1.37814	3.08189	0.00105	0.0250588	yes	40.4532	1.37814	1.37814	2	1	1
4142	ENSMUSG00000023505	ENSMUSG00000023505	Cdca3	6:124829546-124833701	cell division cycle associated 3 [Source:MGI Symbol;Acc:MGI:1315198]	protein_coding	ENSG00000111665	CDCA3	OK	138.88	168.531	0.279177	1.21789	0.1595	0.629938	no	153.706	0.279177	0.279177	2	0	0	OK	0.524817	58.0021	6.78815	11.8059	5e-05	0.0019768	yes	29.2635	6.78815	6.78815	1	1	1
12049	ENSMUSG00000040767	ENSMUSG00000040767	Snrnp25	11:32205414-32208984	small nuclear ribonucleoprotein 25 (U11/U12) [Source:MGI Symbol;Acc:MGI:1925622]	protein_coding	ENSG00000161981	SNRNP25	OK	41.7137	50.5745	0.277887	1.20589	0.15805	0.626889	no	46.1441	0.277887	0.277887	2	0	0	OK	10.9264	57.8276	2.40394	8.18923	5e-05	0.0019768	yes	34.377	2.40394	2.40394	2	1	1
368	ENSMUSG00000002055	ENSMUSG00000002055	Spag5	11:78301528-78322457	sperm associated antigen 5 [Source:MGI Symbol;Acc:MGI:1927470]	protein_coding	NA	NA	OK	85.0929	87.4304	0.0390957	0.0946441	0.9104	0.992805	no	86.2617	0.0390957	0.0390957	2	0	0	OK	0.974127	57.6069	5.88599	9.46951	5e-05	0.0019768	yes	29.2905	5.88599	5.88599	1	1	1
1835	ENSMUSG00000017716	ENSMUSG00000017716	Birc5	11:117849250-117855743	baculoviral IAP repeat-containing 5 [Source:MGI Symbol;Acc:MGI:1203517]	protein_coding	ENSG00000089685	BIRC5	OK	164.267	176.151	0.100763	0.512308	0.5474	0.958005	no	170.209	0.100763	0.100763	2	0	0	OK	0.988233	57.1836	5.85461	13.1179	5e-05	0.0019768	yes	29.0859	5.85461	5.85461	1	1	1
21217	ENSMUSG00000075370	ENSMUSG00000075370	Igll1	16:16860670-16863985	immunoglobulin lambda-like polypeptide 1 [Source:MGI Symbol;Acc:MGI:96529]	protein_coding	none	NA	OK	470.08	831.451	0.822726	4.25257	5e-05	0.0019768	yes	650.765	0.822726	0.822726	2	0	0	OK	29.1709	57.1725	0.97079	4.03173	5e-05	0.0019768	yes	43.1717	0.97079	0.97079	2	0	0
7792	ENSMUSG00000030347	ENSMUSG00000030347	D6Wsu163e	6:126939961-126975967	DNA segment, Chr 6, Wayne State University 163, expressed [Source:MGI Symbol;Acc:MGI:107893]	protein_coding	ENSG00000047621	C12orf4	OK	18.2357	26.6294	0.546253	1.53605	0.07425	0.450773	no	22.4325	0.546253	0.546253	2	0	0	OK	32.5785	57.0854	0.809204	2.64083	0.00175	0.0366759	yes	44.8319	0.809204	0.809204	2	0	0
2116	ENSMUSG00000019715	ENSMUSG00000019715	Gle1	2:29935425-29960371	GLE1 RNA export mediator (yeast) [Source:MGI Symbol;Acc:MGI:1921662]	protein_coding	ENSG00000119392	GLE1	OK	27.7621	37.7116	0.441891	1.03051	0.2063	0.704158	no	32.7368	0.441891	0.441891	2	0	0	OK	27.487	56.9995	1.0522	2.58886	0.0026	0.0494895	yes	42.2432	1.0522	1.0522	2	1	1
504	ENSMUSG00000002944	ENSMUSG00000002944	Cd36	5:17781689-17888801	CD36 molecule [Source:MGI Symbol;Acc:MGI:107899]	protein_coding	ENSG00000135218	CD36	OK	9.46851	23.7667	1.32773	5.99575	5e-05	0.0019768	yes	16.6176	1.32773	1.32773	2	1	1	OK	121.122	56.9803	-1.08793	-5.87664	5e-05	0.0019768	yes	89.0512	-1.08793	1.08793	2	1	1
12765	ENSMUSG00000043019	ENSMUSG00000043019	Edem3	1:151755370-151822051	ER degradation enhancer, mannosidase alpha-like 3 [Source:MGI Symbol;Acc:MGI:1914217]	protein_coding	ENSG00000116406	EDEM3	OK	6.89271	6.95322	0.0126093	0.059542	0.9413	0.993842	no	6.92296	0.0126093	0.0126093	2	0	0	OK	87.6089	56.945	-0.621509	-3.37662	0.0001	0.00364222	yes	72.2769	-0.621509	0.621509	2	0	0
10333	ENSMUSG00000036390	ENSMUSG00000036390	Gadd45a	6:67035095-67080654	growth arrest and DNA-damage-inducible 45 alpha [Source:MGI Symbol;Acc:MGI:107799]	protein_coding	ENSG00000116717	GADD45A	OK	28.6092	20.7898	-0.460603	-1.65428	0.0514	0.365087	no	24.6995	-0.460603	0.460603	2	0	0	OK	91.8061	56.2093	-0.707782	-3.34391	0.00015	0.00513825	yes	74.0077	-0.707782	0.707782	2	0	0
6959	ENSMUSG00000028884	ENSMUSG00000028884	Rpa2	4:132768331-132778752	replication protein A2 [Source:MGI Symbol;Acc:MGI:1339939]	protein_coding	ENSG00000117748	RPA2	OK	54.9269	85.0717	0.631168	2.9074	0.0005	0.0140204	yes	69.9993	0.631168	0.631168	2	0	0	OK	13.6015	55.8478	2.03774	8.37922	5e-05	0.0019768	yes	34.7246	2.03774	2.03774	2	1	1
6230	ENSMUSG00000027635	ENSMUSG00000027635	Dsn1	2:156995264-157007154	DSN1 homolog, MIS12 kinetochore complex component [Source:MGI Symbol;Acc:MGI:1914184]	protein_coding	ENSG00000149636	DSN1	OK	19.5577	21.9787	0.16837	0.659381	0.4322	0.912194	no	20.7682	0.16837	0.16837	2	0	0	OK	14.1474	55.7354	1.97806	7.80635	5e-05	0.0019768	yes	34.9414	1.97806	1.97806	2	1	1
9059	ENSMUSG00000032586	ENSMUSG00000032586	Traip	9:107950135-107972270	TRAF-interacting protein [Source:MGI Symbol;Acc:MGI:1096377]	protein_coding	ENSG00000183763	TRAIP	OK	37.0015	46.2285	0.321198	0.809778	0.3318	0.840344	no	41.615	0.321198	0.321198	2	0	0	OK	2.22426	55.4878	4.64077	7.17311	5e-05	0.0019768	yes	28.856	4.64077	4.64077	2	1	1
8610	ENSMUSG00000031848	ENSMUSG00000031848	Lsm4	8:70673247-70678752	LSM4 homolog, U6 small nuclear RNA and mRNA degradation associated [Source:MGI Symbol;Acc:MGI:1354692]	protein_coding	ENSG00000130520	LSM4	OK	171.445	187.634	0.130178	0.565942	0.50085	0.942338	no	179.539	0.130178	0.130178	2	0	0	OK	28.7923	55.4798	0.946279	2.92117	0.0006	0.016251	yes	42.136	0.946279	0.946279	2	0	0
996	ENSMUSG00000006398	ENSMUSG00000006398	Cdc20	4:118428092-118437352	cell division cycle 20 [Source:MGI Symbol;Acc:MGI:1859866]	protein_coding	ENSG00000117399	CDC20	OK	149.938	144.706	-0.0512453	-0.191893	0.81615	0.992781	no	147.322	-0.0512453	0.0512453	2	0	0	OK	7.32898	55.0751	2.90972	5.39152	5e-05	0.0019768	yes	31.202	2.90972	2.90972	2	1	1
4874	ENSMUSG00000025135	ENSMUSG00000025135	Anapc11	11:120598420-120608198	anaphase promoting complex subunit 11 [Source:MGI Symbol;Acc:MGI:1913406]	protein_coding	none	NA	OK	55.0794	64.0936	0.218667	0.971705	0.2532	0.761991	no	59.5865	0.218667	0.218667	2	0	0	OK	19.345	54.8585	1.50376	5.19562	5e-05	0.0019768	yes	37.1017	1.50376	1.50376	2	1	1
9952	ENSMUSG00000035202	ENSMUSG00000035202	Lars2	9:123366926-123462666	leucyl-tRNA synthetase, mitochondrial [Source:MGI Symbol;Acc:MGI:2142973]	protein_coding	ENSG00000011376	LARS2	OK	43.1024	46.665	0.114572	0.563638	0.473	0.93248	no	44.8837	0.114572	0.114572	2	0	0	OK	29.6456	54.6887	0.883426	4.38357	5e-05	0.0019768	yes	42.1671	0.883426	0.883426	2	0	0
10561	ENSMUSG00000037020	ENSMUSG00000037020	Wdr62	7:30240137-30290237	WD repeat domain 62 [Source:MGI Symbol;Acc:MGI:1923696]	protein_coding	ENSG00000075702	WDR62	OK	10.299	12.5727	0.287796	0.628838	0.42675	0.909229	no	11.4358	0.287796	0.287796	2	0	0	OK	1.84763	54.5895	4.88488	8.07109	5e-05	0.0019768	yes	28.2186	4.88488	4.88488	1	1	1
10758	ENSMUSG00000037544	ENSMUSG00000037544	Dlgap5	14:47387778-47418407	DLG associated protein 5 [Source:MGI Symbol;Acc:MGI:2183453]	protein_coding	ENSG00000126787	DLGAP5	OK	60.213	44.0783	-0.450005	-1.58813	0.05185	0.366576	no	52.1457	-0.450005	0.450005	2	0	0	OK	4.14626	54.0348	3.704	8.93581	5e-05	0.0019768	yes	29.0905	3.704	3.704	2	1	1
4802	ENSMUSG00000024989	ENSMUSG00000024989	Cep55	19:38055010-38074423	centrosomal protein 55 [Source:MGI Symbol;Acc:MGI:1921357]	protein_coding	ENSG00000138180	CEP55	OK	49.5076	40.4703	-0.290784	-1.49415	0.07885	0.46499	no	44.989	-0.290784	0.290784	2	0	0	OK	2.49807	53.8026	4.42879	15.2199	5e-05	0.0019768	yes	28.1503	4.42879	4.42879	2	1	1
12020	ENSMUSG00000040710	ENSMUSG00000040710	St8sia4	1:95587681-95667571	ST8 alpha-N-acetyl-neuraminide alpha-2,8-sialyltransferase 4 [Source:MGI Symbol;Acc:MGI:106018]	protein_coding	ENSG00000113532	ST8SIA4	OK	9.96869	10.7206	0.104911	0.507189	0.5555	0.960558	no	10.3446	0.104911	0.104911	2	0	0	OK	86.6691	53.6326	-0.692408	-3.77574	5e-05	0.0019768	yes	70.1508	-0.692408	0.692408	2	0	0
4688	ENSMUSG00000024800	ENSMUSG00000024800	Rpp30	19:36083715-36104777	ribonuclease P/MRP 30 subunit [Source:MGI Symbol;Acc:MGI:1859683]	protein_coding	ENSG00000148688	RPP30	OK	51.4341	64.3274	0.322708	1.086	0.1996	0.694097	no	57.8807	0.322708	0.322708	2	0	0	OK	26.1736	53.1781	1.02272	3.06723	0.0005	0.0140204	yes	39.6758	1.02272	1.02272	2	1	1
15482	ENSMUSG00000053310	ENSMUSG00000053310	Nrgn	9:37544491-37552904	neurogranin [Source:MGI Symbol;Acc:MGI:1927184]	protein_coding	ENSG00000154146	NRGN	OK	0.317682	2.74078	3.10893	3.20544	0.00065	0.017298	yes	1.52923	3.10893	3.10893	1	1	1	OK	4.27553	52.2662	3.61171	8.7164	5e-05	0.0019768	yes	28.2709	3.61171	3.61171	2	1	1
7900	ENSMUSG00000030579	ENSMUSG00000030579	Tyrobp	7:30413759-30417585	TYRO protein tyrosine kinase binding protein [Source:MGI Symbol;Acc:MGI:1277211]	protein_coding	ENSG00000011600	TYROBP	OK	7.34809	15.3477	1.06258	2.74594	0.00285	0.0530489	no	11.3479	1.06258	1.06258	2	1	0	OK	30.4203	52.2496	0.780384	2.91011	0.00065	0.017298	yes	41.3349	0.780384	0.780384	2	0	0
13277	ENSMUSG00000044906	ENSMUSG00000044906	4930503L19Rik	18:70452211-70501066	RIKEN cDNA 4930503L19 gene [Source:MGI Symbol;Acc:MGI:1922045]	protein_coding	ENSG00000166845	C18orf54	OK	40.4168	43.7454	0.114175	0.535023	0.53165	0.953058	no	42.0811	0.114175	0.114175	2	0	0	OK	26.0308	51.5221	0.984975	4.47373	5e-05	0.0019768	yes	38.7764	0.984975	0.984975	2	0	0
6610	ENSMUSG00000028312	ENSMUSG00000028312	Smc2	4:52439242-52488260	structural maintenance of chromosomes 2 [Source:MGI Symbol;Acc:MGI:106067]	protein_coding	ENSG00000136824	SMC2	OK	60.4234	68.8326	0.187985	1.03345	0.2201	0.721782	no	64.628	0.187985	0.187985	2	0	0	OK	6.46939	51.0633	2.98058	13.4574	5e-05	0.0019768	yes	28.7663	2.98058	2.98058	2	1	1
4649	ENSMUSG00000024742	ENSMUSG00000024742	Fen1	19:10198367-10207824	flap structure specific endonuclease 1 [Source:MGI Symbol;Acc:MGI:102779]	protein_coding	ENSG00000168496	FEN1	OK	69.1138	94.3768	0.449459	2.0053	0.01965	0.203303	no	81.7453	0.449459	0.449459	2	0	0	OK	24.9102	50.9137	1.03132	4.41487	5e-05	0.0019768	yes	37.9119	1.03132	1.03132	2	1	1
7493	ENSMUSG00000029752	ENSMUSG00000029752	Asns	6:7675168-7693254	asparagine synthetase [Source:MGI Symbol;Acc:MGI:1350929]	protein_coding	ENSG00000070669	ASNS	OK	167.711	99.1141	-0.758811	-2.65345	0.0014	0.0309503	yes	133.413	-0.758811	0.758811	2	0	0	OK	24.3879	49.0775	1.00889	2.97151	0.00025	0.00795068	yes	36.7327	1.00889	1.00889	2	1	1
1667	ENSMUSG00000015880	ENSMUSG00000015880	Ncapg	5:45669918-45857615	non-SMC condensin I complex, subunit G [Source:MGI Symbol;Acc:MGI:1930197]	protein_coding	ENSG00000109805	NCAPG	OK	74.6215	75.062	0.00849043	0.021989	0.97965	0.996066	no	74.8417	0.00849043	0.00849043	2	0	0	OK	3.55839	48.9949	3.78333	4.3489	5e-05	0.0019768	yes	26.2766	3.78333	3.78333	2	1	1
11466	ENSMUSG00000039231	ENSMUSG00000039231	Suv39h1	X:8042942-8074760	suppressor of variegation 3-9 1 [Source:MGI Symbol;Acc:MGI:1099440]	protein_coding	ENSG00000101945	SUV39H1	OK	48.4742	57.54	0.247349	1.28912	0.13475	0.597628	no	53.0071	0.247349	0.247349	2	0	0	OK	8.67831	48.6303	2.48637	11.4996	5e-05	0.0019768	yes	28.6543	2.48637	2.48637	2	1	1
12178	ENSMUSG00000041219	ENSMUSG00000041219	Arhgap11a	2:113831491-113848661	Rho GTPase activating protein 11A [Source:MGI Symbol;Acc:MGI:2444300]	protein_coding	NA	NA	OK	46.8287	58.4309	0.319339	1.73582	0.0434	0.335371	no	52.6298	0.319339	0.319339	2	0	0	OK	7.4395	47.9294	2.68763	13.1033	5e-05	0.0019768	yes	27.6845	2.68763	2.68763	2	1	1
15196	ENSMUSG00000051998	ENSMUSG00000051998	Lax1	1:133679090-133690108	lymphocyte transmembrane adaptor 1 [Source:MGI Symbol;Acc:MGI:2443362]	protein_coding	ENSG00000122188	LAX1	OK	21.9183	16.859	-0.378616	-1.76525	0.0385	0.31425	no	19.3886	-0.378616	0.378616	2	0	0	OK	72.0761	46.9994	-0.616878	-3.23416	0.0002	0.00660246	yes	59.5378	-0.616878	0.616878	2	0	0
9221	ENSMUSG00000033031	ENSMUSG00000033031	Cip2a	16:48994184-49019709	cell proliferation regulating inhibitor of protein phosphatase 2A [Source:MGI Symbol;Acc:MGI:2146335]	protein_coding	ENSG00000163507	CIP2A	OK	47.7013	45.4389	-0.0701009	-0.283902	0.71295	0.988138	no	46.5701	-0.0701009	0.0701009	2	0	0	OK	6.72854	46.7409	2.79632	9.70964	5e-05	0.0019768	yes	26.7347	2.79632	2.79632	2	1	1
14659	ENSMUSG00000049932	ENSMUSG00000049932	H2afx	9:44334693-44336077	H2A histone family, member X [Source:MGI Symbol;Acc:MGI:102688]	protein_coding	ENSG00000188486	H2AFX	OK	270.449	198.817	-0.443917	-2.42627	0.0045	0.0740826	no	234.633	-0.443917	0.443917	2	0	0	OK	15.255	46.3521	1.60336	6.99919	5e-05	0.0019768	yes	30.8036	1.60336	1.60336	2	1	1
848	ENSMUSG00000005470	ENSMUSG00000005470	Asf1b	8:83955506-83970197	anti-silencing function 1B histone chaperone [Source:MGI Symbol;Acc:MGI:1914179]	protein_coding	ENSG00000105011	ASF1B	OK	60.4122	84.9922	0.492491	2.5536	0.0029	0.0537491	no	72.7022	0.492491	0.492491	2	0	0	OK	6.549	46.1561	2.81718	10.7727	5e-05	0.0019768	yes	26.3526	2.81718	2.81718	2	1	1
3722	ENSMUSG00000022503	ENSMUSG00000022503	Nubp1	16:10411947-10447362	nucleotide binding protein 1 [Source:MGI Symbol;Acc:MGI:1347073]	protein_coding	ENSG00000103274	NUBP1	OK	49.8509	59.8355	0.263382	0.997994	0.23435	0.739337	no	54.8432	0.263382	0.263382	2	0	0	OK	24.5601	45.9223	0.902881	3.73067	5e-05	0.0019768	yes	35.2412	0.902881	0.902881	2	0	0
14332	ENSMUSG00000048668	ENSMUSG00000048668	Rhno1	6:128356003-128362911	RAD9-HUS1-RAD1 interacting nuclear orphan 1 [Source:MGI Symbol;Acc:MGI:1915315]	protein_coding	ENSG00000171792	RHNO1	OK	70.9421	67.5272	-0.0711723	-0.312397	0.7005	0.98622	no	69.2346	-0.0711723	0.0711723	2	0	0	OK	25.1573	45.7928	0.864146	3.50515	5e-05	0.0019768	yes	35.475	0.864146	0.864146	2	0	0
818	ENSMUSG00000005233	ENSMUSG00000005233	Spc25	2:69193894-69206194	SPC25, NDC80 kinetochore complex component, homolog (S. cerevisiae) [Source:MGI Symbol;Acc:MGI:1913692]	protein_coding	ENSG00000152253	SPC25	OK	49.8995	51.2222	0.0377454	0.166446	0.83865	0.992781	no	50.5609	0.0377454	0.0377454	2	0	0	OK	4.63519	45.6847	3.30101	9.69113	5e-05	0.0019768	yes	25.1599	3.30101	3.30101	2	1	1
6473	ENSMUSG00000028066	ENSMUSG00000028066	Pmf1	3:88394142-88410331	polyamine-modulated factor 1 [Source:MGI Symbol;Acc:MGI:1914287]	protein_coding	ENSG00000160783	PMF1	OK	79.8221	80.3857	0.0101493	0.0482417	0.9543	0.994937	no	80.1039	0.0101493	0.0101493	2	0	0	OK	17.7083	45.6505	1.36621	4.84765	5e-05	0.0019768	yes	31.6794	1.36621	1.36621	2	1	1
2452	ENSMUSG00000020328	ENSMUSG00000020328	Nudcd2	11:40733666-40740046	NudC domain containing 2 [Source:MGI Symbol;Acc:MGI:1277103]	protein_coding	ENSG00000170584	NUDCD2	OK	109.413	113.236	0.0495573	0.203919	0.81145	0.992781	no	111.325	0.0495573	0.0495573	2	0	0	OK	22.2162	45.2656	1.02681	3.45315	5e-05	0.0019768	yes	33.7409	1.02681	1.02681	2	1	1
10727	ENSMUSG00000037461	ENSMUSG00000037461	Ints7	1:191575635-191623688	integrator complex subunit 7 [Source:MGI Symbol;Acc:MGI:1924315]	protein_coding	ENSG00000143493	INTS7	OK	31.3169	41.3594	0.401271	1.99886	0.01715	0.184792	no	36.3381	0.401271	0.401271	2	0	0	OK	24.3094	45.1897	0.894482	4.5634	5e-05	0.0019768	yes	34.7495	0.894482	0.894482	2	0	0
1380	ENSMUSG00000011884	ENSMUSG00000011884	Gltp	5:114669397-114690984	glycolipid transfer protein [Source:MGI Symbol;Acc:MGI:1929253]	protein_coding	ENSG00000139433	GLTP	OK	36.4678	43.0151	0.238218	1.1826	0.16345	0.637506	no	39.7415	0.238218	0.238218	2	0	0	OK	27.713	44.9485	0.697713	3.40586	5e-05	0.0019768	yes	36.3308	0.697713	0.697713	2	0	0
6952	ENSMUSG00000028873	ENSMUSG00000028873	Cdca8	4:124918464-124944656	cell division cycle associated 8 [Source:MGI Symbol;Acc:MGI:1196274]	protein_coding	ENSG00000134690	CDCA8	OK	131.031	143.212	0.128245	0.617326	0.46525	0.929944	no	137.121	0.128245	0.128245	2	0	0	OK	3.24823	44.1656	3.7652	6.64087	5e-05	0.0019768	yes	23.7069	3.7652	3.7652	2	1	1
3653	ENSMUSG00000022391	ENSMUSG00000022391	Rangap1	15:81704247-81796260	RAN GTPase activating protein 1 [Source:MGI Symbol;Acc:MGI:103071]	protein_coding	ENSG00000100401	RANGAP1	OK	70.306	76.9226	0.129759	0.430529	0.5552	0.960558	no	73.6143	0.129759	0.129759	2	0	0	OK	16.624	43.4911	1.38745	3.69686	5e-05	0.0019768	yes	30.0575	1.38745	1.38745	2	1	1
14101	ENSMUSG00000047832	ENSMUSG00000047832	Cdca4	12:112820228-112829423	cell division cycle associated 4 [Source:MGI Symbol;Acc:MGI:1919213]	protein_coding	ENSG00000170779	CDCA4	OK	53.922	58.3607	0.114124	0.589766	0.49185	0.938995	no	56.1414	0.114124	0.114124	2	0	0	OK	24.8851	42.8195	0.782987	3.857	5e-05	0.0019768	yes	33.8523	0.782987	0.782987	2	0	0
10588	ENSMUSG00000037103	ENSMUSG00000037103	Dcaf15	8:84097071-84104768	DDB1 and CUL4 associated factor 15 [Source:MGI Symbol;Acc:MGI:2684420]	protein_coding	ENSG00000132017	DCAF15	OK	30.8454	30.8482	0.000128981	0.000634509	0.99935	0.999793	no	30.8468	0.000128981	0.000128981	2	0	0	OK	29.2265	42.0394	0.524464	2.62771	0.00235	0.0459717	yes	35.633	0.524464	0.524464	2	0	0
10866	ENSMUSG00000037847	ENSMUSG00000037847	Nmrk1	19:18631949-18652428	nicotinamide riboside kinase 1 [Source:MGI Symbol;Acc:MGI:2147434]	protein_coding	ENSG00000106733	NMRK1	OK	32.1279	27.5965	-0.219341	-0.945826	0.26555	0.77488	no	29.8622	-0.219341	0.219341	2	0	0	OK	60.9063	41.5728	-0.550952	-2.5382	0.0019	0.0390934	yes	51.2396	-0.550952	0.550952	2	0	0
5859	ENSMUSG00000026955	ENSMUSG00000026955	Sapcd2	2:25372320-25378213	suppressor APC domain containing 2 [Source:MGI Symbol;Acc:MGI:1919330]	protein_coding	ENSG00000186193	SAPCD2	OK	107.24	78.8851	-0.443023	-1.75268	0.03865	0.314834	no	93.0625	-0.443023	0.443023	2	0	0	OK	0.724083	41.2851	5.83332	9.51521	5e-05	0.0019768	yes	21.0046	5.83332	5.83332	1	1	1
3376	ENSMUSG00000021932	ENSMUSG00000021932	Rnaseh2b	14:62276230-62372992	ribonuclease H2, subunit B [Source:MGI Symbol;Acc:MGI:1914403]	protein_coding	ENSG00000136104	RNASEH2B	OK	30.9942	40.942	0.401583	1.48405	0.07925	0.466228	no	35.9681	0.401583	0.401583	2	0	0	OK	21.418	40.8477	0.931429	3.49511	5e-05	0.0019768	yes	31.1329	0.931429	0.931429	2	0	0
522	ENSMUSG00000003038	ENSMUSG00000003038	Hmgn2	4:133964737-133968650	high mobility group nucleosomal binding domain 2 [Source:MGI Symbol;Acc:MGI:96136]	protein_coding	NA	NA	OK	347.45	441.575	0.345856	1.70314	0.04765	0.351782	no	394.512	0.345856	0.345856	2	0	0	OK	13.5433	40.5833	1.5833	4.42814	5e-05	0.0019768	yes	27.0633	1.5833	1.5833	2	1	1
16654	ENSMUSG00000058729	ENSMUSG00000058729	Lin9	1:180641149-180690694	lin-9 homolog (C. elegans) [Source:MGI Symbol;Acc:MGI:1919818]	protein_coding	ENSG00000183814	LIN9	OK	13.0504	17.7567	0.444271	1.67186	0.04385	0.336641	no	15.4035	0.444271	0.444271	2	0	0	OK	10.0477	40.2418	2.00184	7.31287	5e-05	0.0019768	yes	25.1447	2.00184	2.00184	2	1	1
10961	ENSMUSG00000038065	ENSMUSG00000038065	Mturn	6:54680929-54703851	maturin, neural progenitor differentiation regulator homolog (Xenopus) [Source:MGI Symbol;Acc:MGI:1915485]	protein_coding	ENSG00000180354	MTURN	OK	0.478117	0.607525	0.345581	0.401583	0.53545	0.954622	no	0.542821	0.345581	0.345581	0	0	0	OK	25.168	39.9728	0.667427	3.33631	5e-05	0.0019768	yes	32.5704	0.667427	0.667427	2	0	0
6966	ENSMUSG00000028896	ENSMUSG00000028896	Rcc1	4:132331918-132353686	regulator of chromosome condensation 1 [Source:MGI Symbol;Acc:MGI:1913989]	protein_coding	ENSG00000180198	RCC1	OK	64.0369	87.871	0.456485	1.77393	0.0287	0.26053	no	75.9539	0.456485	0.456485	2	0	0	OK	7.31554	39.6322	2.43764	6.73648	5e-05	0.0019768	yes	23.4739	2.43764	2.43764	2	1	1
2314	ENSMUSG00000020101	ENSMUSG00000020101	Vsir	10:60302747-60696490	V-set immunoregulatory receptor [Source:MGI Symbol;Acc:MGI:1921298]	protein_coding	ENSG00000107738	VSIR	OK	8.93903	10.3144	0.20647	0.689296	0.39935	0.892793	no	9.62672	0.20647	0.20647	2	0	0	OK	63.8274	39.4116	-0.695556	-3.14904	0.00045	0.0129202	yes	51.6195	-0.695556	0.695556	2	0	0
16555	ENSMUSG00000058290	ENSMUSG00000058290	Espl1	15:102296265-102324357	extra spindle pole bodies 1, separase [Source:MGI Symbol;Acc:MGI:2146156]	protein_coding	ENSG00000135476	ESPL1	OK	104.794	111.468	0.0890688	0.155781	0.85465	0.992781	no	108.131	0.0890688	0.0890688	2	0	0	OK	2.10674	39.2602	4.21998	4.03985	0.00035	0.0105257	yes	20.6835	4.21998	4.21998	2	1	1
20799	ENSMUSG00000074405	ENSMUSG00000074405	Zfp865	7:5007058-5062049	zinc finger protein 865 [Source:MGI Symbol;Acc:MGI:2442656]	protein_coding	ENSG00000261221	ZNF865	OK	12.0883	13.9779	0.209535	0.672078	0.41815	0.904917	no	13.0331	0.209535	0.209535	2	0	0	OK	20.9839	39.0008	0.894219	3.54949	5e-05	0.0019768	yes	29.9923	0.894219	0.894219	2	0	0
3824	ENSMUSG00000022673	ENSMUSG00000022673	Mcm4	16:15623896-15637400	minichromosome maintenance complex component 4 [Source:MGI Symbol;Acc:MGI:103199]	protein_coding	ENSG00000104738	MCM4	OK	53.5	76.4599	0.515166	2.46495	0.001	0.0241412	yes	64.98	0.515166	0.515166	2	0	0	OK	13.1577	38.2518	1.53962	6.94997	5e-05	0.0019768	yes	25.7048	1.53962	1.53962	2	1	1
9853	ENSMUSG00000034906	ENSMUSG00000034906	Ncaph	2:127103808-127133954	non-SMC condensin I complex, subunit H [Source:MGI Symbol;Acc:MGI:2444777]	protein_coding	ENSG00000121152	NCAPH	OK	54.4265	61.3386	0.172487	0.707117	0.30695	0.816997	no	57.8825	0.172487	0.172487	2	0	0	OK	3.18303	37.9379	3.57517	12.5665	5e-05	0.0019768	yes	20.5605	3.57517	3.57517	2	1	1
8119	ENSMUSG00000030978	ENSMUSG00000030978	Rrm1	7:102441694-102469771	ribonucleotide reductase M1 [Source:MGI Symbol;Acc:MGI:98180]	protein_coding	ENSG00000167325	RRM1	OK	163.213	202.558	0.311577	1.12434	0.1783	0.660755	no	182.885	0.311577	0.311577	2	0	0	OK	17.8333	37.8906	1.08727	3.37812	0.00015	0.00513825	yes	27.862	1.08727	1.08727	2	1	1
10834	ENSMUSG00000037754	ENSMUSG00000037754	Ppp1r16b	2:158665397-158766334	protein phosphatase 1, regulatory subunit 16B [Source:MGI Symbol;Acc:MGI:2151841]	protein_coding	ENSG00000101445	PPP1R16B	OK	14.1786	14.5363	0.0359487	0.1839	0.8298	0.992781	no	14.3575	0.0359487	0.0359487	2	0	0	OK	60.145	37.3695	-0.686583	-3.74639	5e-05	0.0019768	yes	48.7572	-0.686583	0.686583	2	0	0
6653	ENSMUSG00000028394	ENSMUSG00000028394	Pole3	4:62522648-62525068	polymerase (DNA directed), epsilon 3 (p17 subunit) [Source:MGI Symbol;Acc:MGI:1933378]	protein_coding	ENSG00000148229	POLE3	OK	38.5414	49.5544	0.362602	1.58041	0.04475	0.338841	no	44.0479	0.362602	0.362602	2	0	0	OK	22.664	37.2824	0.718093	3.26621	0.0001	0.00364222	yes	29.9732	0.718093	0.718093	2	0	0
4020	ENSMUSG00000023015	ENSMUSG00000023015	Racgap1	15:99620495-99651656	Rac GTPase-activating protein 1 [Source:MGI Symbol;Acc:MGI:1349423]	protein_coding	ENSG00000161800	RACGAP1	OK	102.755	104.265	0.021042	0.0827296	0.9163	0.993025	no	103.51	0.021042	0.021042	2	0	0	OK	13.1141	36.9856	1.49584	4.75624	5e-05	0.0019768	yes	25.0498	1.49584	1.49584	2	1	1
243	ENSMUSG00000001403	ENSMUSG00000001403	Ube2c	2:164769897-164779967	ubiquitin-conjugating enzyme E2C [Source:MGI Symbol;Acc:MGI:1915862]	protein_coding	ENSG00000175063	UBE2C	OK	316.922	281.61	-0.17043	-0.926808	0.2756	0.786723	no	299.266	-0.17043	0.17043	2	0	0	OK	3.05186	36.919	3.5966	10.303	5e-05	0.0019768	yes	19.9854	3.5966	3.5966	2	1	1
4681	ENSMUSG00000024791	ENSMUSG00000024791	Cdca5	19:6084982-6091777	cell division cycle associated 5 [Source:MGI Symbol;Acc:MGI:1915099]	protein_coding	ENSG00000146670	CDCA5	OK	40.0715	53.8899	0.427438	2.145	0.0134	0.156328	no	46.9807	0.427438	0.427438	2	0	0	OK	1.17044	36.8476	4.97645	13.7355	5e-05	0.0019768	yes	19.009	4.97645	4.97645	1	1	1
94	ENSMUSG00000000552	ENSMUSG00000000552	Zfp385a	15:103313894-103340093	zinc finger protein 385A [Source:MGI Symbol;Acc:MGI:1352495]	protein_coding	ENSG00000161642	ZNF385A	OK	18.8492	28.0888	0.575495	2.7766	0.0011	0.0259231	yes	23.469	0.575495	0.575495	2	0	0	OK	23.9887	36.3852	0.601001	2.97431	0.00065	0.017298	yes	30.1869	0.601001	0.601001	2	0	0
6732	ENSMUSG00000028525	ENSMUSG00000028525	Pde4b	4:102087542-102607259	phosphodiesterase 4B, cAMP specific [Source:MGI Symbol;Acc:MGI:99557]	protein_coding	ENSG00000184588	PDE4B	OK	15.9151	10.7211	-0.569942	-2.61027	0.002	0.0405447	yes	13.3181	-0.569942	0.569942	2	0	0	OK	53.6431	36.1322	-0.570107	-2.85779	0.0012	0.0273763	yes	44.8876	-0.570107	0.570107	2	0	0
1822	ENSMUSG00000017652	ENSMUSG00000017652	Cd40	2:165055626-165072948	CD40 antigen [Source:MGI Symbol;Acc:MGI:88336]	protein_coding	ENSG00000101017	CD40	OK	3.37773	1.05855	-1.67397	-2.53766	0.00145	0.0317447	yes	2.21814	-1.67397	1.67397	1	1	1	OK	19.3868	35.9732	0.891845	3.1416	0.0002	0.00660246	yes	27.68	0.891845	0.891845	2	0	0
13234	ENSMUSG00000044734	ENSMUSG00000044734	Serpinb1a	13:32842091-32851185	serine (or cysteine) peptidase inhibitor, clade B, member 1a [Source:MGI Symbol;Acc:MGI:1913472]	protein_coding	NA	NA	OK	57.9243	61.4428	0.0850764	0.250547	0.76735	0.99264	no	59.6835	0.0850764	0.0850764	2	0	0	OK	16.8018	35.9406	1.097	3.2941	0.0002	0.00660246	yes	26.3712	1.097	1.097	2	1	1
1049	ENSMUSG00000006715	ENSMUSG00000006715	Gmnn	13:24751844-24761923	geminin [Source:MGI Symbol;Acc:MGI:1927344]	protein_coding	ENSG00000112312	GMNN	OK	57.5096	69.0226	0.263266	1.23902	0.1389	0.599714	no	63.2661	0.263266	0.263266	2	0	0	OK	7.32775	35.865	2.29114	6.42799	5e-05	0.0019768	yes	21.5964	2.29114	2.29114	2	1	1
13522	ENSMUSG00000045751	ENSMUSG00000045751	Mms22l	4:24496450-24602950	MMS22-like, DNA repair protein [Source:MGI Symbol;Acc:MGI:2684980]	protein_coding	ENSG00000146263	MMS22L	OK	29.0189	34.1084	0.233132	0.852069	0.28565	0.797281	no	31.5637	0.233132	0.233132	2	0	0	OK	9.07506	35.8296	1.98117	6.78403	5e-05	0.0019768	yes	22.4523	1.98117	1.98117	2	1	1
17263	ENSMUSG00000061533	ENSMUSG00000061533	Cep128	12:90998491-91384409	centrosomal protein 128 [Source:MGI Symbol;Acc:MGI:1922466]	protein_coding	ENSG00000100629	CEP128	OK	15.4349	21.994	0.510916	0.962223	0.22945	0.7336	no	18.7144	0.510916	0.510916	2	0	0	OK	10.6145	35.5361	1.74325	3.30478	0.0006	0.016251	yes	23.0753	1.74325	1.74325	2	1	1
1313	ENSMUSG00000010362	ENSMUSG00000010362	Rdm1	11:101627194-101636100	RAD52 motif 1 [Source:MGI Symbol;Acc:MGI:1913849]	protein_coding	ENSG00000278023	RDM1	OK	70.0192	48.6497	-0.52532	-1.89826	0.02795	0.255946	no	59.3345	-0.52532	0.52532	2	0	0	OK	3.04908	35.3453	3.53507	7.26973	5e-05	0.0019768	yes	19.1972	3.53507	3.53507	2	1	1
9135	ENSMUSG00000032783	ENSMUSG00000032783	Troap	15:99068137-99083409	trophinin associated protein [Source:MGI Symbol;Acc:MGI:1925983]	protein_coding	ENSG00000135451	TROAP	OK	52.4948	31.3179	-0.745189	-2.49729	0.00365	0.0636162	no	41.9064	-0.745189	0.745189	2	0	0	OK	1.38793	35.314	4.66923	9.42562	5e-05	0.0019768	yes	18.351	4.66923	4.66923	1	1	1
8413	ENSMUSG00000031532	ENSMUSG00000031532	Saraf	8:34154574-34170821	store-operated calcium entry-associated regulatory factor [Source:MGI Symbol;Acc:MGI:1915137]	protein_coding	ENSG00000133872	SARAF	OK	24.7284	15.7907	-0.647094	-2.89547	0.00055	0.0151958	yes	20.2596	-0.647094	0.647094	2	0	0	OK	53.5854	34.9317	-0.617301	-3.10159	0.00015	0.00513825	yes	44.2585	-0.617301	0.617301	2	0	0
10449	ENSMUSG00000036768	ENSMUSG00000036768	Kif15	9:122951045-123018733	kinesin family member 15 [Source:MGI Symbol;Acc:MGI:1098258]	protein_coding	ENSG00000163808	KIF15	OK	83.2072	85.9194	0.0462755	0.134725	0.87	0.992781	no	84.5633	0.0462755	0.0462755	2	0	0	OK	2.22115	34.8513	3.97183	7.1784	5e-05	0.0019768	yes	18.5362	3.97183	3.97183	2	1	1
4587	ENSMUSG00000024610	ENSMUSG00000024610	Cd74	18:60803847-60812652	CD74 antigen (invariant polypeptide of major histocompatibility complex, class II antigen-associated) [Source:MGI Symbol;Acc:MGI:96534]	protein_coding	ENSG00000019582	CD74	OK	103.986	235.758	1.18091	6.10945	5e-05	0.0019768	yes	169.872	1.18091	1.18091	2	1	1	OK	18.497	34.8455	0.91368	3.85317	5e-05	0.0019768	yes	26.6713	0.91368	0.91368	2	0	0
6137	ENSMUSG00000027469	ENSMUSG00000027469	Tpx2	2:152847963-152895321	TPX2, microtubule-associated [Source:MGI Symbol;Acc:MGI:1919369]	protein_coding	ENSG00000088325	TPX2	OK	92.738	99.6806	0.104151	0.326886	0.59265	0.971235	no	96.2093	0.104151	0.104151	2	0	0	OK	4.39724	34.591	2.97573	4.67238	5e-05	0.0019768	yes	19.4941	2.97573	2.97573	2	1	1
12160	ENSMUSG00000041143	ENSMUSG00000041143	Tmco4	4:138972887-139059171	transmembrane and coiled-coil domains 4 [Source:MGI Symbol;Acc:MGI:1924306]	protein_coding	ENSG00000162542	TMCO4	OK	12.2559	19.2128	0.648599	2.49148	0.00445	0.0736463	no	15.7344	0.648599	0.648599	2	0	0	OK	16.3271	34.4034	1.07528	4.05533	5e-05	0.0019768	yes	25.3652	1.07528	1.07528	2	1	1
9190	ENSMUSG00000032939	ENSMUSG00000032939	Nup93	8:94214563-94317227	nucleoporin 93 [Source:MGI Symbol;Acc:MGI:1919055]	protein_coding	ENSG00000102900	NUP93	OK	36.8844	57.2427	0.634081	2.97968	0.00105	0.0250588	yes	47.0635	0.634081	0.634081	2	0	0	OK	19.4974	33.8073	0.794053	3.3437	0.0002	0.00660246	yes	26.6523	0.794053	0.794053	2	0	0
4034	ENSMUSG00000023034	ENSMUSG00000023034	Nr4a1	15:101254268-101274795	nuclear receptor subfamily 4, group A, member 1 [Source:MGI Symbol;Acc:MGI:1352454]	protein_coding	ENSG00000123358	NR4A1	OK	11.5703	12.4943	0.110847	0.328498	0.6345	0.976524	no	12.0323	0.110847	0.110847	2	0	0	OK	15.334	33.7805	1.13946	3.86653	5e-05	0.0019768	yes	24.5573	1.13946	1.13946	2	1	1
5807	ENSMUSG00000026866	ENSMUSG00000026866	Kynu	2:43555328-43682715	kynureninase [Source:MGI Symbol;Acc:MGI:1918039]	protein_coding	ENSG00000115919	KYNU	NOTEST	0.0563058	0.147891	1.39318	0	1	1	no	0.102098	1.39318	1.39318	0	1	0	OK	12.6505	33.5783	1.40833	5.65825	5e-05	0.0019768	yes	23.1144	1.40833	1.40833	2	1	1
1147	ENSMUSG00000008035	ENSMUSG00000008035	Mid1ip1	X:10707175-10719690	Mid1 interacting protein 1 (gastrulation specific G12-like (zebrafish)) [Source:MGI Symbol;Acc:MGI:1915291]	protein_coding	ENSG00000165175	MID1IP1	OK	40.7802	46.4765	0.188629	0.60982	0.4549	0.925784	no	43.6283	0.188629	0.188629	2	0	0	OK	18.2881	33.2909	0.864219	3.13012	0.0006	0.016251	yes	25.7895	0.864219	0.864219	2	0	0
11356	ENSMUSG00000038990	ENSMUSG00000038990	Cables2	2:180258539-180273496	CDK5 and Abl enzyme substrate 2 [Source:MGI Symbol;Acc:MGI:2182335]	protein_coding	ENSG00000149679	CABLES2	OK	13.3052	16.2663	0.289891	1.25264	0.12825	0.587926	no	14.7858	0.289891	0.289891	2	0	0	OK	23.1279	33.2452	0.523508	2.47737	0.0025	0.0482205	yes	28.1865	0.523508	0.523508	2	0	0
9372	ENSMUSG00000033538	ENSMUSG00000033538	Casp4	9:5308827-5336783	caspase 4, apoptosis-related cysteine peptidase [Source:MGI Symbol;Acc:MGI:107700]	protein_coding	none	NA	OK	3.24789	3.51979	0.115987	0.137996	0.81325	0.992781	no	3.38384	0.115987	0.115987	2	0	0	OK	15.4076	33.1526	1.10548	3.50836	5e-05	0.0019768	yes	24.2801	1.10548	1.10548	2	1	1
4633	ENSMUSG00000024712	ENSMUSG00000024712	Rfk	19:17394042-17401349	riboflavin kinase [Source:MGI Symbol;Acc:MGI:1914688]	protein_coding	ENSG00000135002	RFK	OK	31.6678	28.1358	-0.17061	-0.613524	0.46445	0.929944	no	29.9018	-0.17061	0.17061	2	0	0	OK	56.1062	33.147	-0.759283	-2.78345	0.0011	0.0259231	yes	44.6266	-0.759283	0.759283	2	0	0
7219	ENSMUSG00000029304	ENSMUSG00000029304	Spp1	5:104435117-104441050	secreted phosphoprotein 1 [Source:MGI Symbol;Acc:MGI:98389]	protein_coding	ENSG00000118785	SPP1	OK	27.6038	30.6887	0.152842	0.695539	0.4087	0.897934	no	29.1463	0.152842	0.152842	2	0	0	OK	3.19452	33.1393	3.37487	9.80338	5e-05	0.0019768	yes	18.1669	3.37487	3.37487	2	1	1
1911	ENSMUSG00000018362	ENSMUSG00000018362	Kpna2	11:106988628-106999541	karyopherin (importin) alpha 2 [Source:MGI Symbol;Acc:MGI:103561]	protein_coding	NA	NA	OK	99.8935	94.7909	-0.0756419	-0.349114	0.6727	0.982027	no	97.3422	-0.0756419	0.0756419	2	0	0	OK	13.9382	32.2893	1.21201	4.76734	5e-05	0.0019768	yes	23.1137	1.21201	1.21201	2	1	1
2370	ENSMUSG00000020186	ENSMUSG00000020186	Csrp2	10:110919788-110939622	cysteine and glycine-rich protein 2 [Source:MGI Symbol;Acc:MGI:1202907]	protein_coding	ENSG00000175183	CSRP2	OK	92.8848	68.3956	-0.441538	-1.90532	0.02235	0.221024	no	80.6402	-0.441538	0.441538	2	0	0	OK	15.6764	32.2545	1.04091	3.41893	0.0001	0.00364222	yes	23.9655	1.04091	1.04091	2	1	1
6082	ENSMUSG00000027379	ENSMUSG00000027379	Bub1	2:127801121-127831865	BUB1, mitotic checkpoint serine/threonine kinase [Source:MGI Symbol;Acc:MGI:1100510]	protein_coding	ENSG00000169679	BUB1	OK	52.4386	56.1909	0.0997093	0.448349	0.5512	0.959339	no	54.3148	0.0997093	0.0997093	2	0	0	OK	2.28936	32.0876	3.809	9.95544	5e-05	0.0019768	yes	17.1885	3.809	3.809	2	1	1
878	ENSMUSG00000005667	ENSMUSG00000005667	Mthfd2	6:83305690-83325908	methylenetetrahydrofolate dehydrogenase (NAD+ dependent), methenyltetrahydrofolate cyclohydrolase [Source:MGI Symbol;Acc:MGI:1338850]	protein_coding	ENSG00000065911	MTHFD2	OK	112	82.8119	-0.435588	-2.04415	0.0076	0.107706	no	97.4059	-0.435588	0.435588	2	0	0	OK	14.8062	31.9601	1.11007	3.69693	5e-05	0.0019768	yes	23.3832	1.11007	1.11007	2	1	1
7876	ENSMUSG00000030528	ENSMUSG00000030528	Blm	7:80454732-80535119	Bloom syndrome, RecQ like helicase [Source:MGI Symbol;Acc:MGI:1328362]	protein_coding	ENSG00000197299	BLM	OK	46.9536	42.5611	-0.141702	-0.333682	0.69405	0.985395	no	44.7574	-0.141702	0.141702	2	0	0	OK	4.35497	31.8431	2.87025	4.33747	5e-05	0.0019768	yes	18.099	2.87025	2.87025	2	1	1
630	ENSMUSG00000003779	ENSMUSG00000003779	Kif20a	18:34624612-34651735	kinesin family member 20A [Source:MGI Symbol;Acc:MGI:1201682]	protein_coding	ENSG00000112984	KIF20A	OK	58.2579	59.3604	0.0270463	0.107747	0.8931	0.992805	no	58.8092	0.0270463	0.0270463	2	0	0	OK	3.77351	31.8375	3.07675	6.03492	5e-05	0.0019768	yes	17.8055	3.07675	3.07675	2	1	1
3607	ENSMUSG00000022322	ENSMUSG00000022322	Shcbp1	8:4735975-4779567	Shc SH2-domain binding protein 1 [Source:MGI Symbol;Acc:MGI:1338802]	protein_coding	ENSG00000171241	SHCBP1	OK	37.731	48.5629	0.364103	1.83663	0.02905	0.262567	no	43.147	0.364103	0.364103	2	0	0	OK	1.01193	31.6062	4.96502	10.092	5e-05	0.0019768	yes	16.3091	4.96502	4.96502	1	1	1
20115	ENSMUSG00000071711	ENSMUSG00000071711	Mpst	15:78406415-78414013	mercaptopyruvate sulfurtransferase [Source:MGI Symbol;Acc:MGI:2179733]	protein_coding	ENSG00000128309	MPST	OK	33.9241	30.4156	-0.157498	-0.709754	0.40615	0.89645	no	32.1699	-0.157498	0.157498	2	0	0	OK	18.162	31.4829	0.79364	3.37708	0.0001	0.00364222	yes	24.8224	0.79364	0.79364	2	0	0
3443	ENSMUSG00000022034	ENSMUSG00000022034	Esco2	14:65819037-65833994	establishment of sister chromatid cohesion N-acetyltransferase 2 [Source:MGI Symbol;Acc:MGI:1919238]	protein_coding	ENSG00000171320	ESCO2	OK	40.7844	46.1237	0.177488	0.738707	0.3687	0.870567	no	43.454	0.177488	0.177488	2	0	0	OK	1.12798	31.3648	4.79733	9.03043	5e-05	0.0019768	yes	16.2464	4.79733	4.79733	1	1	1
15138	ENSMUSG00000051726	ENSMUSG00000051726	Kcnf1	12:17172099-17176888	potassium voltage-gated channel, subfamily F, member 1 [Source:MGI Symbol;Acc:MGI:2687399]	protein_coding	ENSG00000162975	KCNF1	NOTEST	0.135989	0.138155	0.0228005	0	1	1	no	0.137072	0.0228005	0.0228005	0	0	0	OK	48.4351	31.1845	-0.635227	-3.33258	0.0001	0.00364222	yes	39.8098	-0.635227	0.635227	2	0	0
6126	ENSMUSG00000027452	ENSMUSG00000027452	Acss1	2:150618104-150668935	acyl-CoA synthetase short-chain family member 1 [Source:MGI Symbol;Acc:MGI:1915988]	protein_coding	ENSG00000154930	ACSS1	OK	23.4216	24.1184	0.0422929	0.211945	0.79935	0.992781	no	23.77	0.0422929	0.0422929	2	0	0	OK	44.2861	30.9675	-0.516101	-2.67227	0.00145	0.0317447	yes	37.6268	-0.516101	0.516101	2	0	0
7373	ENSMUSG00000029554	ENSMUSG00000029554	Mad1l1	5:140008688-140321552	MAD1 mitotic arrest deficient 1-like 1 [Source:MGI Symbol;Acc:MGI:1341857]	protein_coding	ENSG00000002822	MAD1L1	OK	35.4632	38.2089	0.107585	0.241155	0.7671	0.99264	no	36.8361	0.107585	0.107585	2	0	0	OK	13.0784	30.9192	1.24132	2.69976	0.0016	0.0341927	yes	21.9988	1.24132	1.24132	2	1	1
7734	ENSMUSG00000030254	ENSMUSG00000030254	Rad18	6:112619849-112696686	RAD18 E3 ubiquitin protein ligase [Source:MGI Symbol;Acc:MGI:1890476]	protein_coding	ENSG00000070950	RAD18	OK	16.8437	17.9559	0.0922445	0.420745	0.61485	0.973534	no	17.3998	0.0922445	0.0922445	2	0	0	OK	11.552	30.7699	1.41338	6.33244	5e-05	0.0019768	yes	21.1609	1.41338	1.41338	2	1	1
6040	ENSMUSG00000027323	ENSMUSG00000027323	Rad51	2:119112792-119157034	RAD51 recombinase [Source:MGI Symbol;Acc:MGI:97890]	protein_coding	ENSG00000051180	RAD51	OK	32.0323	35.5835	0.151681	0.415042	0.61185	0.973311	no	33.8079	0.151681	0.151681	2	0	0	OK	1.82901	30.6292	4.06577	4.12485	0.0005	0.0140204	yes	16.2291	4.06577	4.06577	1	1	1
1116	ENSMUSG00000007659	ENSMUSG00000007659	Bcl2l1	2:152780667-152831728	BCL2-like 1 [Source:MGI Symbol;Acc:MGI:88139]	protein_coding	ENSG00000171552	BCL2L1	OK	24.6583	33.2639	0.431885	1.93601	0.02135	0.215055	no	28.9611	0.431885	0.431885	2	0	0	OK	57.6287	30.3721	-0.924042	-3.74628	5e-05	0.0019768	yes	44.0004	-0.924042	0.924042	2	0	0
2037	ENSMUSG00000018983	ENSMUSG00000018983	E2f2	4:136172393-136196057	E2F transcription factor 2 [Source:MGI Symbol;Acc:MGI:1096341]	protein_coding	ENSG00000007968	E2F2	OK	21.7403	35.6422	0.713212	2.67763	0.0039	0.0669395	no	28.6913	0.713212	0.713212	2	0	0	OK	11.6747	30.3353	1.37762	5.76067	5e-05	0.0019768	yes	21.005	1.37762	1.37762	2	1	1
16934	ENSMUSG00000059939	ENSMUSG00000059939	9430015G10Rik	4:156109981-156127265	RIKEN cDNA 9430015G10 gene [Source:MGI Symbol;Acc:MGI:2444364]	protein_coding	ENSG00000131591	C1orf159	OK	28.8313	25.0589	-0.202312	-0.731861	0.36365	0.866668	no	26.9451	-0.202312	0.202312	2	0	0	OK	11.0394	30.3285	1.45801	5.22513	5e-05	0.0019768	yes	20.6839	1.45801	1.45801	2	1	1
17611	ENSMUSG00000063049	ENSMUSG00000063049	Ing2	8:47667177-47685239	inhibitor of growth family, member 2 [Source:MGI Symbol;Acc:MGI:1916510]	protein_coding	ENSG00000168556	ING2	OK	42.0306	39.1653	-0.101866	-0.330509	0.7026	0.986511	no	40.5979	-0.101866	0.101866	2	0	0	OK	15.5333	30.1083	0.954802	2.85918	0.00075	0.0193743	yes	22.8208	0.954802	0.954802	2	0	0
12243	ENSMUSG00000041431	ENSMUSG00000041431	Ccnb1	13:100778649-100786570	cyclin B1 [Source:MGI Symbol;Acc:MGI:88302]	protein_coding	ENSG00000134057	CCNB1	OK	116.406	99.9299	-0.220174	-1.00977	0.22775	0.73144	no	108.168	-0.220174	0.220174	2	0	0	OK	2.99856	29.9464	3.32004	10.1473	5e-05	0.0019768	yes	16.4725	3.32004	3.32004	2	1	1
17860	ENSMUSG00000064128	ENSMUSG00000064128	Cenpj	14:56526760-56575425	centromere protein J [Source:MGI Symbol;Acc:MGI:2684927]	protein_coding	ENSG00000151849	CENPJ	OK	11.2578	11.1714	-0.0111209	-0.0221845	0.98045	0.996086	no	11.2146	-0.0111209	0.0111209	2	0	0	OK	14.1924	29.4068	1.05103	2.69387	0.0016	0.0341927	yes	21.7996	1.05103	1.05103	2	1	1
7791	ENSMUSG00000030346	ENSMUSG00000030346	Rad51ap1	6:126923049-126939587	RAD51 associated protein 1 [Source:MGI Symbol;Acc:MGI:1098224]	protein_coding	ENSG00000111247	RAD51AP1	OK	47.255	63.8289	0.433743	1.51004	0.0767	0.457137	no	55.5419	0.433743	0.433743	2	0	0	OK	0.830768	29.2723	5.13895	7.34994	5e-05	0.0019768	yes	15.0515	5.13895	5.13895	1	1	1
4273	ENSMUSG00000024064	ENSMUSG00000024064	Galnt14	17:73493227-73710453	polypeptide N-acetylgalactosaminyltransferase 14 [Source:MGI Symbol;Acc:MGI:1918935]	protein_coding	ENSG00000158089	GALNT14	OK	22.5687	21.8368	-0.0475631	-0.211214	0.80345	0.992781	no	22.2028	-0.0475631	0.0475631	2	0	0	OK	18.3853	28.9004	0.652536	2.88869	0.0009	0.022329	yes	23.6429	0.652536	0.652536	2	0	0
17012	ENSMUSG00000060288	ENSMUSG00000060288	Ppih	4:119300009-119320546	peptidyl prolyl isomerase H [Source:MGI Symbol;Acc:MGI:106499]	protein_coding	NA	NA	OK	43.0119	58.1648	0.435411	1.89307	0.0258	0.243165	no	50.5883	0.435411	0.435411	2	0	0	OK	11.979	28.8091	1.26601	4.36541	5e-05	0.0019768	yes	20.3941	1.26601	1.26601	2	1	1
8946	ENSMUSG00000032402	ENSMUSG00000032402	Smad3	9:63646766-63757994	SMAD family member 3 [Source:MGI Symbol;Acc:MGI:1201674]	protein_coding	ENSG00000166949	SMAD3	OK	5.89406	6.62694	0.169081	0.694208	0.3873	0.883499	no	6.2605	0.169081	0.169081	2	0	0	OK	43.6023	28.3962	-0.618708	-3.12597	0.0001	0.00364222	yes	35.9993	-0.618708	0.618708	2	0	0
2806	ENSMUSG00000020898	ENSMUSG00000020898	Ctc1	11:69015910-69036473	CTS telomere maintenance complex component 1 [Source:MGI Symbol;Acc:MGI:1916214]	protein_coding	ENSG00000178971	CTC1	OK	41.6028	35.9746	-0.209702	-0.611448	0.47235	0.932274	no	38.7887	-0.209702	0.209702	2	0	0	OK	6.31352	28.2688	2.16269	4.44184	5e-05	0.0019768	yes	17.2912	2.16269	2.16269	2	1	1
1538	ENSMUSG00000014905	ENSMUSG00000014905	Dnajb9	12:44205558-44210373	DnaJ heat shock protein family (Hsp40) member B9 [Source:MGI Symbol;Acc:MGI:1351618]	protein_coding	ENSG00000128590	DNAJB9	OK	9.47871	11.5566	0.28595	1.14622	0.1584	0.627615	no	10.5177	0.28595	0.28595	2	0	0	OK	42.5933	28.2042	-0.594717	-2.69213	0.0007	0.0183858	yes	35.3987	-0.594717	0.594717	2	0	0
6692	ENSMUSG00000028453	ENSMUSG00000028453	Fancg	4:43002342-43010506	Fanconi anemia, complementation group G [Source:MGI Symbol;Acc:MGI:1926471]	protein_coding	ENSG00000221829	FANCG	OK	11.2968	14.561	0.366199	0.989075	0.219	0.72044	no	12.9289	0.366199	0.366199	2	0	0	OK	11.1826	27.5687	1.30178	3.58738	5e-05	0.0019768	yes	19.3757	1.30178	1.30178	2	1	1
5931	ENSMUSG00000027115	ENSMUSG00000027115	Kif18a	2:109092296-109341747	kinesin family member 18A [Source:MGI Symbol;Acc:MGI:2446977]	protein_coding	ENSG00000121621	KIF18A	OK	14.1717	16.832	0.248186	1.10923	0.19785	0.691592	no	15.5019	0.248186	0.248186	2	0	0	OK	4.45393	27.5568	2.62926	9.65342	5e-05	0.0019768	yes	16.0054	2.62926	2.62926	2	1	1
10122	ENSMUSG00000035704	ENSMUSG00000035704	Alg8	7:97371605-97392185	asparagine-linked glycosylation 8 (alpha-1,3-glucosyltransferase) [Source:MGI Symbol;Acc:MGI:2141959]	protein_coding	ENSG00000159063	ALG8	OK	54.5679	60.6196	0.151732	0.554552	0.5134	0.946971	no	57.5938	0.151732	0.151732	2	0	0	OK	6.63984	27.4424	2.04718	5.78941	5e-05	0.0019768	yes	17.0411	2.04718	2.04718	2	1	1
3434	ENSMUSG00000022021	ENSMUSG00000022021	Diaph3	14:86655366-87141235	diaphanous related formin 3 [Source:MGI Symbol;Acc:MGI:1927222]	protein_coding	ENSG00000139734	DIAPH3	OK	14.9369	19.7663	0.404161	1.1325	0.17565	0.65641	no	17.3516	0.404161	0.404161	2	0	0	OK	2.92893	27.3068	3.22081	6.9574	5e-05	0.0019768	yes	15.1179	3.22081	3.22081	2	1	1
3726	ENSMUSG00000022508	ENSMUSG00000022508	Bcl6	16:23965051-23988852	B cell leukemia/lymphoma 6 [Source:MGI Symbol;Acc:MGI:107187]	protein_coding	ENSG00000113916	BCL6	OK	0.704044	0.503704	-0.48309	-1.04241	0.2307	0.735014	no	0.603874	-0.48309	0.48309	0	0	0	OK	18.63	27.0449	0.537726	2.70486	0.00095	0.0233132	yes	22.8374	0.537726	0.537726	2	0	0
13881	ENSMUSG00000047044	ENSMUSG00000047044	D030056L22Rik	19:18713192-18718428	RIKEN cDNA D030056L22 gene [Source:MGI Symbol;Acc:MGI:3583960]	protein_coding	ENSG00000135045	C9orf40	OK	17.6437	18.1821	0.0433623	0.187888	0.8287	0.992781	no	17.9129	0.0433623	0.0433623	2	0	0	OK	13.0207	26.8398	1.04357	4.55556	5e-05	0.0019768	yes	19.9303	1.04357	1.04357	2	1	1
3647	ENSMUSG00000022385	ENSMUSG00000022385	Gtse1	15:85859744-85876573	G two S phase expressed protein 1 [Source:MGI Symbol;Acc:MGI:1352755]	protein_coding	ENSG00000075218	GTSE1	OK	36.3621	37.3123	0.0372145	0.191934	0.82025	0.992781	no	36.8372	0.0372145	0.0372145	2	0	0	OK	1.57528	26.4905	4.07179	13.3567	5e-05	0.0019768	yes	14.0329	4.07179	4.07179	1	1	1
6155	ENSMUSG00000027496	ENSMUSG00000027496	Aurka	2:172356189-172370535	aurora kinase A [Source:MGI Symbol;Acc:MGI:894678]	protein_coding	ENSG00000087586	AURKA	OK	71.541	65.7725	-0.121285	-0.580873	0.48845	0.936943	no	68.6567	-0.121285	0.121285	2	0	0	OK	6.4503	26.3896	2.03253	7.58932	5e-05	0.0019768	yes	16.42	2.03253	2.03253	2	1	1
4628	ENSMUSG00000024691	ENSMUSG00000024691	Fam111a	19:12517914-12596566	family with sequence similarity 111, member A [Source:MGI Symbol;Acc:MGI:1915508]	protein_coding	ENSG00000166801	FAM111A	OK	52.2272	68.6866	0.395228	2.13599	0.0116	0.14138	no	60.4569	0.395228	0.395228	2	0	0	OK	16.2869	26.2662	0.689496	3.34072	0.00015	0.00513825	yes	21.2766	0.689496	0.689496	2	0	0
8	ENSMUSG00000000058	ENSMUSG00000000058	Cav2	6:17197750-17385604	caveolin 2 [Source:MGI Symbol;Acc:MGI:107571]	protein_coding	ENSG00000105971	CAV2	OK	7.05831	7.00658	-0.010612	-0.0415912	0.96155	0.995028	no	7.03244	-0.010612	0.010612	2	0	0	OK	50.8417	25.9115	-0.972419	-4.89511	5e-05	0.0019768	yes	38.3766	-0.972419	0.972419	2	0	0
2691	ENSMUSG00000020713	ENSMUSG00000020713	Gh	11:106300270-106301865	growth hormone [Source:MGI Symbol;Acc:MGI:95707]	protein_coding	NA	NA	OK	1.18426	0.722657	-0.712599	-1.17008	0.18295	0.668849	no	0.953458	-0.712599	0.712599	0	0	0	OK	9.28634	25.7763	1.47286	4.89924	5e-05	0.0019768	yes	17.5313	1.47286	1.47286	2	1	1
6153	ENSMUSG00000027490	ENSMUSG00000027490	E2f1	2:154559406-154569892	E2F transcription factor 1 [Source:MGI Symbol;Acc:MGI:101941]	protein_coding	ENSG00000101412	E2F1	OK	14.7588	18.7285	0.343662	1.62178	0.0598	0.399976	no	16.7437	0.343662	0.343662	2	0	0	OK	4.23574	25.7065	2.60144	10.5213	5e-05	0.0019768	yes	14.9711	2.60144	2.60144	2	1	1
8424	ENSMUSG00000031546	ENSMUSG00000031546	Gins4	8:23226615-23237659	GINS complex subunit 4 (Sld5 homolog) [Source:MGI Symbol;Acc:MGI:1923847]	protein_coding	ENSG00000147536	GINS4	OK	26.272	32.9133	0.325143	1.47836	0.08915	0.495338	no	29.5926	0.325143	0.325143	2	0	0	OK	15.7212	25.705	0.709335	2.96678	0.00105	0.0250588	yes	20.7131	0.709335	0.709335	2	0	0
9995	ENSMUSG00000035310	ENSMUSG00000035310	Lin54	5:100441917-100500639	lin-54 homolog (C. elegans) [Source:MGI Symbol;Acc:MGI:2140902]	protein_coding	ENSG00000189308	LIN54	OK	8.4061	10.0487	0.257499	1.0329	0.2118	0.711736	no	9.2274	0.257499	0.257499	2	0	0	OK	6.76323	25.5497	1.91752	7.97836	5e-05	0.0019768	yes	16.1565	1.91752	1.91752	2	1	1
17433	ENSMUSG00000062248	ENSMUSG00000062248	Cks2	13:51645231-51650660	CDC28 protein kinase regulatory subunit 2 [Source:MGI Symbol;Acc:MGI:1913447]	protein_coding	ENSG00000123975	CKS2	OK	41.8331	50.3618	0.267684	1.11918	0.18785	0.67639	no	46.0975	0.267684	0.267684	2	0	0	OK	5.57974	25.4506	2.18943	6.10888	5e-05	0.0019768	yes	15.5152	2.18943	2.18943	2	1	1
3	ENSMUSG00000000028	ENSMUSG00000000028	Cdc45	16:18780446-18835261	cell division cycle 45 [Source:MGI Symbol;Acc:MGI:1338073]	protein_coding	ENSG00000093009	CDC45	OK	30.8556	38.6461	0.324791	1.23832	0.14345	0.603697	no	34.7508	0.324791	0.324791	2	0	0	OK	2.01726	25.4221	3.65562	4.28668	0.0008	0.0204598	yes	13.7197	3.65562	3.65562	2	1	1
10730	ENSMUSG00000037466	ENSMUSG00000037466	Tedc1	12:113156420-113166048	tubulin epsilon and delta complex 1 [Source:MGI Symbol;Acc:MGI:2144738]	protein_coding	ENSG00000185347	TEDC1	OK	33.4628	37.2907	0.15626	0.471156	0.5591	0.962087	no	35.3768	0.15626	0.15626	2	0	0	OK	2.25243	25.3839	3.49435	7.34718	5e-05	0.0019768	yes	13.8182	3.49435	3.49435	2	1	1
7982	ENSMUSG00000030722	ENSMUSG00000030722	Nfatc2ip	7:126382853-126397745	nuclear factor of activated T cells, cytoplasmic, calcineurin dependent 2 interacting protein [Source:MGI Symbol;Acc:MGI:1329015]	protein_coding	ENSG00000176953	NFATC2IP	OK	12.0309	14.3242	0.251716	0.826799	0.27985	0.790999	no	13.1776	0.251716	0.251716	2	0	0	OK	9.72233	25.2889	1.37913	4.08066	0.0001	0.00364222	yes	17.5056	1.37913	1.37913	2	1	1
9725	ENSMUSG00000034574	ENSMUSG00000034574	Daam1	12:71831077-71992333	dishevelled associated activator of morphogenesis 1 [Source:MGI Symbol;Acc:MGI:1914596]	protein_coding	ENSG00000100592	DAAM1	OK	2.57362	2.61394	0.0224273	0.0839682	0.92165	0.993025	no	2.59378	0.0224273	0.0224273	2	0	0	OK	17.9112	25.2285	0.494196	2.6315	0.0022	0.0437041	yes	21.5699	0.494196	0.494196	2	0	0
6405	ENSMUSG00000027959	ENSMUSG00000027959	Sass6	3:116562972-116631004	SAS-6 centriolar assembly protein [Source:MGI Symbol;Acc:MGI:1920026]	protein_coding	ENSG00000156876	SASS6	OK	10.3833	15.4118	0.569772	1.4091	0.062	0.409304	no	12.8975	0.569772	0.569772	2	0	0	OK	7.70512	25.218	1.71057	3.79945	0.0001	0.00364222	yes	16.4616	1.71057	1.71057	2	1	1
17612	ENSMUSG00000063052	ENSMUSG00000063052	Lrrc40	3:158036661-158076112	leucine rich repeat containing 40 [Source:MGI Symbol;Acc:MGI:1914394]	protein_coding	ENSG00000066557	LRRC40	OK	25.9457	28.966	0.158866	0.600311	0.4437	0.919203	no	27.4558	0.158866	0.158866	2	0	0	OK	12.643	24.9619	0.981384	3.48851	5e-05	0.0019768	yes	18.8025	0.981384	0.981384	2	0	0
490	ENSMUSG00000002835	ENSMUSG00000002835	Chaf1a	17:56040438-56075028	chromatin assembly factor 1, subunit A (p150) [Source:MGI Symbol;Acc:MGI:1351331]	protein_coding	ENSG00000167670	CHAF1A	OK	36.8676	52.5386	0.511026	1.39867	0.09675	0.516116	no	44.7031	0.511026	0.511026	2	0	0	OK	1.39249	24.6459	4.14561	3.76175	5e-05	0.0019768	yes	13.0192	4.14561	4.14561	1	1	1
9283	ENSMUSG00000033222	ENSMUSG00000033222	Ttf2	3:100938859-100969663	transcription termination factor, RNA polymerase II [Source:MGI Symbol;Acc:MGI:1921294]	protein_coding	ENSG00000116830	TTF2	OK	22.1514	23.8375	0.105833	0.41355	0.6133	0.973534	no	22.9945	0.105833	0.105833	2	0	0	OK	6.8412	24.6017	1.84643	6.83727	5e-05	0.0019768	yes	15.7215	1.84643	1.84643	2	1	1
8402	ENSMUSG00000031513	ENSMUSG00000031513	Leprotl1	8:34135571-34147033	leptin receptor overlapping transcript-like 1 [Source:MGI Symbol;Acc:MGI:1915442]	protein_coding	ENSG00000104660	LEPROTL1	OK	26.9938	17.9082	-0.592006	-2.91895	0.0006	0.016251	yes	22.451	-0.592006	0.592006	2	0	0	OK	38.1684	24.3878	-0.646221	-3.29462	0.0001	0.00364222	yes	31.2781	-0.646221	0.646221	2	0	0
11233	ENSMUSG00000038670	ENSMUSG00000038670	Mybpc2	7:44501688-44524656	myosin binding protein C, fast-type [Source:MGI Symbol;Acc:MGI:1336170]	protein_coding	ENSG00000086967	MYBPC2	OK	0.723928	1.41645	0.968365	1.33887	0.0671	0.427178	no	1.07019	0.968365	0.968365	0	0	0	OK	7.05822	24.2388	1.77994	5.93224	5e-05	0.0019768	yes	15.6485	1.77994	1.77994	2	1	1
20833	ENSMUSG00000074476	ENSMUSG00000074476	Spc24	9:21755441-21760303	SPC24, NDC80 kinetochore complex component, homolog (S. cerevisiae) [Source:MGI Symbol;Acc:MGI:1914879]	protein_coding	ENSG00000161888	SPC24	OK	64.6433	73.0326	0.176039	0.530653	0.52775	0.951262	no	68.838	0.176039	0.176039	2	0	0	OK	0.956855	24.0544	4.65186	5.57992	0.0017	0.035841	yes	12.5056	4.65186	4.65186	1	1	1
7392	ENSMUSG00000029591	ENSMUSG00000029591	Ung	5:114130385-114139323	uracil DNA glycosylase [Source:MGI Symbol;Acc:MGI:109352]	protein_coding	ENSG00000076248	UNG	OK	14.4932	22.8698	0.658066	2.49082	0.00465	0.0759316	no	18.6815	0.658066	0.658066	2	0	0	OK	7.06102	23.9844	1.76415	5.75416	5e-05	0.0019768	yes	15.5227	1.76415	1.76415	2	1	1
3397	ENSMUSG00000021965	ENSMUSG00000021965	Ska3	14:57798179-57826185	spindle and kinetochore associated complex subunit 3 [Source:MGI Symbol;Acc:MGI:3041235]	protein_coding	ENSG00000165480	SKA3	OK	21.5721	27.6186	0.356472	0.856974	0.29015	0.801375	no	24.5953	0.356472	0.356472	2	0	0	OK	0.971525	23.7051	4.6088	3.79125	0.0002	0.00660246	yes	12.3383	4.6088	4.6088	1	1	1
9913	ENSMUSG00000035095	ENSMUSG00000035095	Fam167a	14:63436393-63465498	family with sequence similarity 167, member A [Source:MGI Symbol;Acc:MGI:3606565]	protein_coding	ENSG00000154319	FAM167A	NOTEST	0.183862	0.219688	0.256831	0	1	1	no	0.201775	0.256831	0.256831	0	0	0	OK	10.0956	23.4643	1.21674	5.81715	5e-05	0.0019768	yes	16.7799	1.21674	1.21674	2	1	1
22399	ENSMUSG00000078439	ENSMUSG00000078439	Smim24	10:81393050-81395392	small integral membrane protein 24 [Source:MGI Symbol;Acc:MGI:1919523]	protein_coding	ENSG00000095932	SMIM24	OK	7.43088	9.53838	0.36021	1.06619	0.20815	0.706753	no	8.48463	0.36021	0.36021	2	0	0	OK	12.2349	23.3503	0.932435	3.28393	0.0003	0.00925391	yes	17.7926	0.932435	0.932435	2	0	0
6267	ENSMUSG00000027699	ENSMUSG00000027699	Ect2	3:27097221-27153878	ect2 oncogene [Source:MGI Symbol;Acc:MGI:95281]	protein_coding	ENSG00000114346	ECT2	OK	33.0104	33.7726	0.0329327	0.112092	0.89015	0.992805	no	33.3915	0.0329327	0.0329327	2	0	0	OK	3.27597	23.1928	2.82369	7.56252	5e-05	0.0019768	yes	13.2344	2.82369	2.82369	2	1	1
2646	ENSMUSG00000020652	ENSMUSG00000020652	Cenpo	12:4133102-4239950	centromere protein O [Source:MGI Symbol;Acc:MGI:1923800]	protein_coding	ENSG00000138092	CENPO	OK	16.1242	16.1972	0.00651955	0.0178389	0.9854	0.997088	no	16.1607	0.00651955	0.00651955	2	0	0	OK	11.1932	23.1166	1.04631	2.96121	0.00085	0.0213895	yes	17.1549	1.04631	1.04631	2	1	1
11651	ENSMUSG00000039748	ENSMUSG00000039748	Exo1	1:175880580-175913489	exonuclease 1 [Source:MGI Symbol;Acc:MGI:1349427]	protein_coding	ENSG00000174371	EXO1	OK	57.3133	72.795	0.34497	1.07606	0.2099	0.709195	no	65.0541	0.34497	0.34497	2	0	0	OK	1.66272	23.0813	3.79511	5.98746	5e-05	0.0019768	yes	12.372	3.79511	3.79511	1	1	1
5894	ENSMUSG00000027009	ENSMUSG00000027009	Itga4	2:79255425-79461107	integrin alpha 4 [Source:MGI Symbol;Acc:MGI:96603]	protein_coding	ENSG00000115232	ITGA4	OK	17.1852	20.4689	0.252272	1.26732	0.11215	0.555317	no	18.827	0.252272	0.252272	2	0	0	OK	56.8824	22.574	-1.33332	-6.2098	5e-05	0.0019768	yes	39.7282	-1.33332	1.33332	2	1	1
2450	ENSMUSG00000020326	ENSMUSG00000020326	Ccng1	11:40748551-40755311	cyclin G1 [Source:MGI Symbol;Acc:MGI:102890]	protein_coding	ENSG00000113328	CCNG1	OK	17.7693	18.4793	0.0565197	0.245409	0.7686	0.99264	no	18.1243	0.0565197	0.0565197	2	0	0	OK	36.2184	22.3736	-0.694928	-3.01898	0.00085	0.0213895	yes	29.296	-0.694928	0.694928	2	0	0
1289	ENSMUSG00000010048	ENSMUSG00000010048	Ifrd2	9:107587641-107593385	interferon-related developmental regulator 2 [Source:MGI Symbol;Acc:MGI:1316708]	protein_coding	ENSG00000214706	IFRD2	OK	80.4183	98.0529	0.286035	1.09078	0.2034	0.699509	no	89.2356	0.286035	0.286035	2	0	0	OK	9.60114	22.3262	1.21746	3.19554	0.00055	0.0151958	yes	15.9637	1.21746	1.21746	2	1	1
13384	ENSMUSG00000045273	ENSMUSG00000045273	Cenph	13:100759673-100775899	centromere protein H [Source:MGI Symbol;Acc:MGI:1349448]	protein_coding	ENSG00000153044	CENPH	OK	36.3601	39.6972	0.126684	0.592857	0.4837	0.935433	no	38.0286	0.126684	0.126684	2	0	0	OK	2.22044	21.9955	3.30829	9.13423	5e-05	0.0019768	yes	12.108	3.30829	3.30829	2	1	1
8824	ENSMUSG00000032218	ENSMUSG00000032218	Ccnb2	9:70407691-70421547	cyclin B2 [Source:MGI Symbol;Acc:MGI:88311]	protein_coding	ENSG00000157456	CCNB2	OK	164.234	149.388	-0.136684	-0.740553	0.37805	0.876755	no	156.811	-0.136684	0.136684	2	0	0	OK	2.20248	21.9046	3.31403	9.9469	5e-05	0.0019768	yes	12.0535	3.31403	3.31403	2	1	1
5197	ENSMUSG00000025792	ENSMUSG00000025792	Slc25a10	11:120489405-120499187	solute carrier family 25 (mitochondrial carrier, dicarboxylate transporter), member 10 [Source:MGI Symbol;Acc:MGI:1353497]	protein_coding	ENSG00000262660	AC139530.3	OK	19.8649	23.4096	0.236881	0.986247	0.234	0.738811	no	21.6373	0.236881	0.236881	2	0	0	OK	9.3227	21.8844	1.23108	4.16356	5e-05	0.0019768	yes	15.6035	1.23108	1.23108	2	1	1
37079	ENSMUSG00000098650	ENSMUSG00000098650	Gm28048	11:22758598-22982382	predicted gene, 28048 [Source:MGI Symbol;Acc:MGI:5547784]	protein_coding	NA	NA	OK	5.07223	4.03963	-0.328397	-0.439658	0.5722	0.9663	no	4.55593	-0.328397	0.328397	2	0	0	OK	50.2918	21.853	-1.20249	-3.82003	0.0002	0.00660246	yes	36.0724	-1.20249	1.20249	2	1	1
2941	ENSMUSG00000021143	ENSMUSG00000021143	Pacs2	12:113014507-113074401	phosphofurin acidic cluster sorting protein 2 [Source:MGI Symbol;Acc:MGI:1924399]	protein_coding	ENSG00000179364	PACS2	OK	16.4552	14.6075	-0.171833	-0.608788	0.4237	0.908278	no	15.5313	-0.171833	0.171833	2	0	0	OK	13.1907	21.6839	0.717102	2.5345	0.0012	0.0273763	yes	17.4373	0.717102	0.717102	2	0	0
4180	ENSMUSG00000023908	ENSMUSG00000023908	Pkmyt1	17:23726335-23740867	protein kinase, membrane associated tyrosine/threonine 1 [Source:MGI Symbol;Acc:MGI:2137630]	protein_coding	ENSG00000127564	PKMYT1	OK	26.6492	28.4201	0.0928162	0.423842	0.6148	0.973534	no	27.5346	0.0928162	0.0928162	2	0	0	OK	3.00144	21.6341	2.84958	9.28509	5e-05	0.0019768	yes	12.3178	2.84958	2.84958	2	1	1
2483	ENSMUSG00000020387	ENSMUSG00000020387	Jade2	11:51813454-51857653	jade family PHD finger 2 [Source:MGI Symbol;Acc:MGI:1924151]	protein_coding	ENSG00000043143	JADE2	OK	3.05469	2.70177	-0.177121	-0.690545	0.41835	0.905037	no	2.87823	-0.177121	0.177121	2	0	0	OK	36.7241	21.4614	-0.774984	-4.15302	5e-05	0.0019768	yes	29.0928	-0.774984	0.774984	2	0	0
3470	ENSMUSG00000022092	ENSMUSG00000022092	Ppp3cc	14:70180467-70289471	protein phosphatase 3, catalytic subunit, gamma isoform [Source:MGI Symbol;Acc:MGI:107162]	protein_coding	ENSG00000120910	PPP3CC	OK	111.281	79.9877	-0.47636	-2.52548	0.0032	0.0579761	no	95.6344	-0.47636	0.47636	2	0	0	OK	38.6864	21.3947	-0.854576	-4.06872	5e-05	0.0019768	yes	30.0405	-0.854576	0.854576	2	0	0
7354	ENSMUSG00000029521	ENSMUSG00000029521	Chek2	5:110839978-110874145	checkpoint kinase 2 [Source:MGI Symbol;Acc:MGI:1355321]	protein_coding	ENSG00000183765	CHEK2	OK	19.9512	18.6181	-0.0997706	-0.235153	0.7557	0.99264	no	19.2846	-0.0997706	0.0997706	2	0	0	OK	1.41062	21.3886	3.92244	7.67718	5e-05	0.0019768	yes	11.3996	3.92244	3.92244	1	1	1
4576	ENSMUSG00000024590	ENSMUSG00000024590	Lmnb1	18:56707812-56753424	lamin B1 [Source:MGI Symbol;Acc:MGI:96795]	protein_coding	ENSG00000113368	LMNB1	OK	134.358	164.562	0.292554	1.50804	0.0677	0.429205	no	149.46	0.292554	0.292554	2	0	0	OK	12.0825	21.0551	0.801258	3.61354	5e-05	0.0019768	yes	16.5688	0.801258	0.801258	2	0	0
2894	ENSMUSG00000021065	ENSMUSG00000021065	Fut8	12:77236064-77476338	fucosyltransferase 8 [Source:MGI Symbol;Acc:MGI:1858901]	protein_coding	ENSG00000033170	FUT8	OK	60.1007	50.0371	-0.264382	-1.37498	0.1065	0.541894	no	55.0689	-0.264382	0.264382	2	0	0	OK	35.4847	20.866	-0.76604	-3.696	5e-05	0.0019768	yes	28.1753	-0.76604	0.76604	2	0	0
5693	ENSMUSG00000026683	ENSMUSG00000026683	Nuf2	1:169497933-169531464	NUF2, NDC80 kinetochore complex component [Source:MGI Symbol;Acc:MGI:1914227]	protein_coding	ENSG00000143228	NUF2	OK	50.6511	58.8751	0.217065	1.10637	0.18485	0.671963	no	54.7631	0.217065	0.217065	2	0	0	OK	0.784008	20.8007	4.72962	10.3477	5e-05	0.0019768	yes	10.7924	4.72962	4.72962	1	1	1
16150	ENSMUSG00000056394	ENSMUSG00000056394	Lig1	7:13258966-13311433	ligase I, DNA, ATP-dependent [Source:MGI Symbol;Acc:MGI:101789]	protein_coding	ENSG00000105486	LIG1	OK	65.2392	77.7071	0.252307	1.01948	0.225	0.72812	no	71.4732	0.252307	0.252307	2	0	0	OK	4.81385	20.7797	2.10991	5.51101	5e-05	0.0019768	yes	12.7968	2.10991	2.10991	2	1	1
6863	ENSMUSG00000028718	ENSMUSG00000028718	Stil	4:115000158-115043196	Scl/Tal1 interrupting locus [Source:MGI Symbol;Acc:MGI:107477]	protein_coding	ENSG00000123473	STIL	OK	12.0279	13.0081	0.11302	0.413725	0.54985	0.959225	no	12.518	0.11302	0.11302	2	0	0	OK	1.46501	20.7611	3.82491	7.264	5e-05	0.0019768	yes	11.1131	3.82491	3.82491	1	1	1
13400	ENSMUSG00000045322	ENSMUSG00000045322	Tlr9	9:106222597-106226883	toll-like receptor 9 [Source:MGI Symbol;Acc:MGI:1932389]	protein_coding	ENSG00000239732	TLR9	OK	3.39221	6.89965	1.0243	3.89279	0.0002	0.00660246	yes	5.14593	1.0243	1.0243	2	1	1	OK	9.25218	20.7583	1.16582	5.48364	5e-05	0.0019768	yes	15.0052	1.16582	1.16582	2	1	1
4596	ENSMUSG00000024640	ENSMUSG00000024640	Psat1	19:15904677-15947337	phosphoserine aminotransferase 1 [Source:MGI Symbol;Acc:MGI:2183441]	protein_coding	ENSG00000135069	PSAT1	OK	185.437	166.134	-0.158576	-0.702191	0.3876	0.883861	no	175.786	-0.158576	0.158576	2	0	0	OK	7.9377	20.6384	1.37854	3.99634	5e-05	0.0019768	yes	14.2881	1.37854	1.37854	2	1	1
13403	ENSMUSG00000045328	ENSMUSG00000045328	Cenpe	3:135212536-135273611	centromere protein E [Source:MGI Symbol;Acc:MGI:1098230]	protein_coding	ENSG00000138778	CENPE	OK	42.1319	39.0102	-0.111061	-0.232142	0.7644	0.99264	no	40.571	-0.111061	0.111061	2	0	0	OK	1.06034	20.5686	4.27784	7.402	5e-05	0.0019768	yes	10.8145	4.27784	4.27784	1	1	1
5376	ENSMUSG00000026134	ENSMUSG00000026134	Prim2	1:33453809-33669795	DNA primase, p58 subunit [Source:MGI Symbol;Acc:MGI:97758]	protein_coding	ENSG00000146143	PRIM2	OK	22.8958	28.1135	0.296175	1.40407	0.09965	0.524054	no	25.5046	0.296175	0.296175	2	0	0	OK	9.9021	20.1627	1.02588	4.32699	5e-05	0.0019768	yes	15.0324	1.02588	1.02588	2	1	1
5543	ENSMUSG00000026429	ENSMUSG00000026429	Ube2t	1:134962564-134974162	ubiquitin-conjugating enzyme E2T [Source:MGI Symbol;Acc:MGI:1914446]	protein_coding	ENSG00000077152	UBE2T	OK	35.7139	25.4737	-0.487478	-1.46211	0.08745	0.490092	no	30.5938	-0.487478	0.487478	2	0	0	OK	1.71012	19.9573	3.54475	7.74892	5e-05	0.0019768	yes	10.8337	3.54475	3.54475	1	1	1
2547	ENSMUSG00000020482	ENSMUSG00000020482	Ccdc117	11:5528886-5542187	coiled-coil domain containing 117 [Source:MGI Symbol;Acc:MGI:2144383]	protein_coding	ENSG00000159873	CCDC117	OK	15.5112	13.4837	-0.202092	-0.967672	0.26255	0.771567	no	14.4975	-0.202092	0.202092	2	0	0	OK	29.1885	19.905	-0.552266	-2.80104	0.00125	0.0282769	yes	24.5468	-0.552266	0.552266	2	0	0
1015	ENSMUSG00000006494	ENSMUSG00000006494	Pdk1	2:71873223-71903858	pyruvate dehydrogenase kinase, isoenzyme 1 [Source:MGI Symbol;Acc:MGI:1926119]	protein_coding	ENSG00000152256	PDK1	OK	130.186	98.3727	-0.404242	-1.03002	0.1813	0.665967	no	114.279	-0.404242	0.404242	2	0	0	OK	37.2324	19.8275	-0.909055	-2.4083	0.0023	0.0452288	yes	28.5299	-0.909055	0.909055	2	0	0
5547	ENSMUSG00000026434	ENSMUSG00000026434	Nucks1	1:131910533-131936321	nuclear casein kinase and cyclin-dependent kinase substrate 1 [Source:MGI Symbol;Acc:MGI:1934811]	protein_coding	ENSG00000069275	NUCKS1	OK	59.7723	69.6913	0.221501	1.10453	0.1818	0.666718	no	64.7318	0.221501	0.221501	2	0	0	OK	11.333	19.7926	0.804425	3.54353	5e-05	0.0019768	yes	15.5628	0.804425	0.804425	2	0	0
5707	ENSMUSG00000026708	ENSMUSG00000026708	Cenpl	1:161070712-161086724	centromere protein L [Source:MGI Symbol;Acc:MGI:1917704]	protein_coding	ENSG00000120334	CENPL	OK	22.5088	27.1691	0.271478	1.04643	0.2161	0.71713	no	24.839	0.271478	0.271478	2	0	0	OK	6.45046	19.6933	1.61023	4.98868	5e-05	0.0019768	yes	13.0719	1.61023	1.61023	2	1	1
8130	ENSMUSG00000031004	ENSMUSG00000031004	Mki67	7:135689783-135716361	antigen identified by monoclonal antibody Ki 67 [Source:MGI Symbol;Acc:MGI:106035]	protein_coding	ENSG00000148773	MKI67	OK	96.0695	85.4644	-0.168756	-0.908233	0.27455	0.785554	no	90.767	-0.168756	0.168756	2	0	0	OK	2.97211	19.6359	2.72394	12.8259	5e-05	0.0019768	yes	11.304	2.72394	2.72394	2	1	1
13221	ENSMUSG00000044702	ENSMUSG00000044702	Palb2	7:122107261-122132985	partner and localizer of BRCA2 [Source:MGI Symbol;Acc:MGI:3040695]	protein_coding	ENSG00000083093	PALB2	OK	12.7672	12.6947	-0.00821396	-0.025826	0.975	0.995648	no	12.7309	-0.00821396	0.00821396	2	0	0	OK	4.70831	19.6303	2.0598	5.34841	5e-05	0.0019768	yes	12.1693	2.0598	2.0598	2	1	1
20726	ENSMUSG00000074211	ENSMUSG00000074211	Sdhaf1	7:30321405-30323895	succinate dehydrogenase complex assembly factor 1 [Source:MGI Symbol;Acc:MGI:1915582]	protein_coding	ENSG00000205138	SDHAF1	OK	7.27881	6.83624	-0.0905008	-0.345969	0.686	0.984302	no	7.05753	-0.0905008	0.0905008	2	0	0	OK	12.9601	19.5298	0.5916	2.68039	0.00125	0.0282769	yes	16.245	0.5916	0.5916	2	0	0
5177	ENSMUSG00000025758	ENSMUSG00000025758	Plk4	3:40800018-40816883	polo like kinase 4 [Source:MGI Symbol;Acc:MGI:101783]	protein_coding	ENSG00000142731	PLK4	OK	19.5904	25.1539	0.360632	0.793709	0.3469	0.853007	no	22.3721	0.360632	0.360632	2	0	0	OK	1.383	19.4948	3.81722	5.21249	5e-05	0.0019768	yes	10.4389	3.81722	3.81722	1	1	1
8271	ENSMUSG00000031295	ENSMUSG00000031295	Phka2	X:160502165-160598878	phosphorylase kinase alpha 2 [Source:MGI Symbol;Acc:MGI:97577]	protein_coding	ENSG00000044446	PHKA2	OK	32.933	28.9477	-0.186086	-0.84638	0.28625	0.797719	no	30.9404	-0.186086	0.186086	2	0	0	OK	12.0493	19.3303	0.681918	2.54699	0.00155	0.0333643	yes	15.6898	0.681918	0.681918	2	0	0
15940	ENSMUSG00000055421	ENSMUSG00000055421	Pcdh9	14:93013409-93890679	protocadherin 9 [Source:MGI Symbol;Acc:MGI:1306801]	protein_coding	ENSG00000184226	PCDH9	OK	13.4128	10.985	-0.288077	-0.712263	0.3892	0.884741	no	12.1989	-0.288077	0.288077	2	0	0	OK	48.0788	19.3293	-1.31461	-4.04671	5e-05	0.0019768	yes	33.7041	-1.31461	1.31461	2	1	1
14395	ENSMUSG00000048922	ENSMUSG00000048922	Cdca2	14:67676330-67715841	cell division cycle associated 2 [Source:MGI Symbol;Acc:MGI:1919787]	protein_coding	ENSG00000184661	CDCA2	OK	45.375	42.2913	-0.101535	-0.376362	0.64305	0.977693	no	43.8332	-0.101535	0.101535	2	0	0	OK	2.66131	19.3057	2.85882	6.40377	5e-05	0.0019768	yes	10.9835	2.85882	2.85882	2	1	1
21186	ENSMUSG00000075266	ENSMUSG00000075266	Cenpw	10:30194568-30200560	centromere protein W [Source:MGI Symbol;Acc:MGI:1913561]	protein_coding	ENSG00000203760	CENPW	OK	25.2681	25.8954	0.0353828	0.158691	0.8448	0.992781	no	25.5817	0.0353828	0.0353828	2	0	0	OK	1.33021	19.2491	3.85506	10.224	5e-05	0.0019768	yes	10.2897	3.85506	3.85506	1	1	1
12870	ENSMUSG00000043445	ENSMUSG00000043445	Pgp	17:24470391-24473110	phosphoglycolate phosphatase [Source:MGI Symbol;Acc:MGI:1914328]	protein_coding	ENSG00000184207	PGP	OK	32.5059	31.679	-0.0371729	-0.189769	0.82435	0.992781	no	32.0924	-0.0371729	0.0371729	2	0	0	OK	13.0159	19.1645	0.558165	2.60102	0.0026	0.0494895	yes	16.0902	0.558165	0.558165	2	0	0
5170	ENSMUSG00000025742	ENSMUSG00000025742	Prps2	X:167346321-167382749	phosphoribosyl pyrophosphate synthetase 2 [Source:MGI Symbol;Acc:MGI:97776]	protein_coding	ENSG00000101911	PRPS2	OK	22.1726	23.5982	0.0898953	0.34654	0.6668	0.980559	no	22.8854	0.0898953	0.0898953	2	0	0	OK	38.8596	19.1553	-1.02053	-3.60396	0.00015	0.00513825	yes	29.0074	-1.02053	1.02053	2	1	1
15199	ENSMUSG00000052013	ENSMUSG00000052013	Btla	16:45224314-45257670	B and T lymphocyte associated [Source:MGI Symbol;Acc:MGI:2658978]	protein_coding	ENSG00000186265	BTLA	OK	12.9221	15.5517	0.267226	1.21334	0.15275	0.617059	no	14.2369	0.267226	0.267226	2	0	0	OK	11.265	19.0873	0.760765	3.37443	5e-05	0.0019768	yes	15.1761	0.760765	0.760765	2	0	0
6553	ENSMUSG00000028207	ENSMUSG00000028207	Asph	4:9267322-9669350	aspartate-beta-hydroxylase [Source:MGI Symbol;Acc:MGI:1914186]	protein_coding	ENSG00000198363	ASPH	OK	12.6825	8.65133	-0.551848	-2.07215	0.0106	0.133374	no	10.6669	-0.551848	0.551848	2	0	0	OK	30.7437	19.0689	-0.689068	-2.94353	0.0004	0.0117599	yes	24.9063	-0.689068	0.689068	2	0	0
22898	ENSMUSG00000079553	ENSMUSG00000079553	Kifc1	17:33875658-33890661	kinesin family member C1 [Source:MGI Symbol;Acc:MGI:109596]	protein_coding	NA	NA	OK	63.3167	43.3826	-0.545468	-1.56722	0.0601	0.401174	no	53.3496	-0.545468	0.545468	2	0	0	OK	2.62668	19.0382	2.85758	4.56563	5e-05	0.0019768	yes	10.8324	2.85758	2.85758	2	1	1
14011	ENSMUSG00000047534	ENSMUSG00000047534	Mis18bp1	12:65132733-65172604	MIS18 binding protein 1 [Source:MGI Symbol;Acc:MGI:2145099]	protein_coding	ENSG00000129534	MIS18BP1	OK	19.0834	22.9247	0.264587	1.01087	0.16795	0.64412	no	21.004	0.264587	0.264587	2	0	0	OK	1.68034	18.938	3.49446	6.74319	5e-05	0.0019768	yes	10.3092	3.49446	3.49446	1	1	1
11952	ENSMUSG00000040549	ENSMUSG00000040549	Ckap5	2:91526761-91620664	cytoskeleton associated protein 5 [Source:MGI Symbol;Acc:MGI:1923036]	protein_coding	ENSG00000175216	CKAP5	OK	32.1304	37.8106	0.234854	1.01084	0.2099	0.709195	no	34.9705	0.234854	0.234854	2	0	0	OK	11.0048	18.9287	0.782436	3.24576	0.0001	0.00364222	yes	14.9667	0.782436	0.782436	2	0	0
4436	ENSMUSG00000024334	ENSMUSG00000024334	H2-Oa	17:34083842-34095309	histocompatibility 2, O region alpha locus [Source:MGI Symbol;Acc:MGI:95924]	protein_coding	ENSG00000204252	HLA-DOA	OK	15.9091	13.694	-0.21631	-0.79198	0.35495	0.85884	no	14.8016	-0.21631	0.21631	2	0	0	OK	10.6462	18.9035	0.828317	2.93824	0.0012	0.0273763	yes	14.7749	0.828317	0.828317	2	0	0
14706	ENSMUSG00000050107	ENSMUSG00000050107	Haspin	11:73090582-73147446	histone H3 associated protein kinase [Source:MGI Symbol;Acc:MGI:1194498]	protein_coding	ENSG00000177602	HASPIN	OK	14.7141	17.4511	0.246124	1.15326	0.17685	0.658105	no	16.0826	0.246124	0.246124	2	0	0	OK	3.82358	18.7903	2.29699	8.97804	5e-05	0.0019768	yes	11.3069	2.29699	2.29699	2	1	1
15237	ENSMUSG00000052214	ENSMUSG00000052214	Opa3	7:19228333-19256543	optic atrophy 3 [Source:MGI Symbol;Acc:MGI:2686271]	protein_coding	ENSG00000125741	OPA3	OK	19.8121	18.5354	-0.0961059	-0.471485	0.5786	0.967552	no	19.1737	-0.0961059	0.0961059	2	0	0	OK	9.88458	18.7814	0.926057	4.14939	5e-05	0.0019768	yes	14.333	0.926057	0.926057	2	0	0
6834	ENSMUSG00000028678	ENSMUSG00000028678	Kif2c	4:117159638-117182639	kinesin family member 2C [Source:MGI Symbol;Acc:MGI:1921054]	protein_coding	ENSG00000142945	KIF2C	OK	33.7226	23.6319	-0.512978	-2.24417	0.00315	0.0572725	no	28.6773	-0.512978	0.512978	2	0	0	OK	3.846	18.7439	2.28499	7.46279	5e-05	0.0019768	yes	11.295	2.28499	2.28499	2	1	1
9392	ENSMUSG00000033596	ENSMUSG00000033596	Rfwd3	8:111270943-111300222	ring finger and WD repeat domain 3 [Source:MGI Symbol;Acc:MGI:2384584]	protein_coding	ENSG00000168411	RFWD3	OK	21.214	27.8083	0.3905	2.03776	0.0166	0.181429	no	24.5112	0.3905	0.3905	2	0	0	OK	7.63312	18.5626	1.28206	6.12353	5e-05	0.0019768	yes	13.0979	1.28206	1.28206	2	1	1
14919	ENSMUSG00000050921	ENSMUSG00000050921	P2ry10	X:107088491-107104974	purinergic receptor P2Y, G-protein coupled 10 [Source:MGI Symbol;Acc:MGI:1926076]	protein_coding	ENSG00000078589	P2RY10	OK	22.3595	22.203	-0.0101336	-0.049755	0.9555	0.994937	no	22.2812	-0.0101336	0.0101336	2	0	0	OK	31.1373	18.4746	-0.753096	-3.72144	5e-05	0.0019768	yes	24.8059	-0.753096	0.753096	2	0	0
7828	ENSMUSG00000030423	ENSMUSG00000030423	Pop4	7:38261995-38333530	processing of precursor 4, ribonuclease P/MRP family, (S. cerevisiae) [Source:MGI Symbol;Acc:MGI:1913411]	protein_coding	ENSG00000105171	POP4	OK	21.3449	24.4482	0.195839	0.781085	0.35435	0.858466	no	22.8965	0.195839	0.195839	2	0	0	OK	10.8085	18.4488	0.771364	2.644	0.0021	0.0421329	yes	14.6287	0.771364	0.771364	2	0	0
5565	ENSMUSG00000026469	ENSMUSG00000026469	Xpr1	1:155275700-155417415	xenotropic and polytropic retrovirus receptor 1 [Source:MGI Symbol;Acc:MGI:97932]	protein_coding	ENSG00000143324	XPR1	OK	19.3212	17.2026	-0.16756	-0.841026	0.3205	0.830591	no	18.2619	-0.16756	0.16756	2	0	0	OK	26.6619	18.3749	-0.53704	-2.71821	0.00145	0.0317447	yes	22.5184	-0.53704	0.53704	2	0	0
6277	ENSMUSG00000027715	ENSMUSG00000027715	Ccna2	3:36552605-36572150	cyclin A2 [Source:MGI Symbol;Acc:MGI:108069]	protein_coding	ENSG00000145386	CCNA2	OK	172.764	116.38	-0.569955	-2.45074	0.00415	0.0702896	no	144.572	-0.569955	0.569955	2	0	0	OK	1.25771	18.365	3.86809	5.25045	5e-05	0.0019768	yes	9.81135	3.86809	3.86809	1	1	1
5685	ENSMUSG00000026669	ENSMUSG00000026669	Mcm10	2:4989713-5012791	minichromosome maintenance 10 replication initiation factor [Source:MGI Symbol;Acc:MGI:1917274]	protein_coding	ENSG00000065328	MCM10	OK	38.1644	55.2037	0.532538	2.15039	0.01195	0.144522	no	46.684	0.532538	0.532538	2	0	0	OK	2.74948	18.3284	2.73685	6.04528	5e-05	0.0019768	yes	10.5389	2.73685	2.73685	2	1	1
579	ENSMUSG00000003411	ENSMUSG00000003411	Rab3b	4:108879062-108972077	RAB3B, member RAS oncogene family [Source:MGI Symbol;Acc:MGI:1917158]	protein_coding	ENSG00000169213	RAB3B	OK	0.550879	0.447129	-0.301042	-0.340981	0.6527	0.978501	no	0.499004	-0.301042	0.301042	0	0	0	OK	8.1622	18.1993	1.15685	3.66493	0.0001	0.00364222	yes	13.1807	1.15685	1.15685	2	1	1
2746	ENSMUSG00000020808	ENSMUSG00000020808	Pimreg	11:72042031-72047370	PICALM interacting mitotic regulator [Source:MGI Symbol;Acc:MGI:1924434]	protein_coding	ENSG00000129195	PIMREG	OK	57.6635	48.6013	-0.246664	-1.03609	0.21985	0.721469	no	53.1324	-0.246664	0.246664	2	0	0	OK	1.1129	17.7714	3.99716	7.31344	5e-05	0.0019768	yes	9.44215	3.99716	3.99716	1	1	1
14234	ENSMUSG00000048327	ENSMUSG00000048327	Ckap2l	2:129246375-129297212	cytoskeleton associated protein 2-like [Source:MGI Symbol;Acc:MGI:1917716]	protein_coding	ENSG00000169607	CKAP2L	OK	34.0527	29.8218	-0.191402	-0.988605	0.24745	0.755405	no	31.9372	-0.191402	0.191402	2	0	0	OK	2.78579	17.7612	2.67257	10.1629	5e-05	0.0019768	yes	10.2735	2.67257	2.67257	2	1	1
5953	ENSMUSG00000027177	ENSMUSG00000027177	Hipk3	2:104426480-104494446	homeodomain interacting protein kinase 3 [Source:MGI Symbol;Acc:MGI:1314882]	protein_coding	ENSG00000110422	HIPK3	OK	10.546	12.818	0.281468	1.36216	0.09455	0.509632	no	11.682	0.281468	0.281468	2	0	0	OK	25.4136	17.6781	-0.523634	-2.73073	0.00115	0.026888	yes	21.5459	-0.523634	0.523634	2	0	0
1126	ENSMUSG00000007817	ENSMUSG00000007817	Zmiz1	14:25257522-25666743	zinc finger, MIZ-type containing 1 [Source:MGI Symbol;Acc:MGI:3040693]	protein_coding	ENSG00000108175	ZMIZ1	OK	31.4552	39.0766	0.313008	1.074	0.0599	0.400407	no	35.2659	0.313008	0.313008	2	0	0	OK	29.0352	17.6213	-0.720488	-3.1322	5e-05	0.0019768	yes	23.3283	-0.720488	0.720488	2	0	0
2454	ENSMUSG00000020330	ENSMUSG00000020330	Hmmr	11:40701394-40733422	hyaluronan mediated motility receptor (RHAMM) [Source:MGI Symbol;Acc:MGI:104667]	protein_coding	ENSG00000072571	HMMR	OK	43.2809	53.0721	0.294225	1.35882	0.08585	0.48605	no	48.1765	0.294225	0.294225	2	0	0	OK	1.98135	17.6165	3.15237	10.3349	5e-05	0.0019768	yes	9.79892	3.15237	3.15237	1	1	1
1004	ENSMUSG00000006445	ENSMUSG00000006445	Epha2	4:141301239-141329384	Eph receptor A2 [Source:MGI Symbol;Acc:MGI:95278]	protein_coding	ENSG00000142627	EPHA2	OK	13.4309	15.824	0.23655	1.05321	0.18615	0.674083	no	14.6274	0.23655	0.23655	2	0	0	OK	26.5609	17.5938	-0.594239	-2.73066	0.00045	0.0129202	yes	22.0774	-0.594239	0.594239	2	0	0
4199	ENSMUSG00000023940	ENSMUSG00000023940	Sgo1	17:53674785-53689333	shugoshin 1 [Source:MGI Symbol;Acc:MGI:1919665]	protein_coding	ENSG00000129810	SGO1	OK	26.0101	27.3669	0.073362	0.296582	0.6715	0.982027	no	26.6885	0.073362	0.073362	2	0	0	OK	0.814992	17.542	4.42788	7.99325	5e-05	0.0019768	yes	9.1785	4.42788	4.42788	1	1	1
9179	ENSMUSG00000032902	ENSMUSG00000032902	Slc16a1	3:104638667-104658462	solute carrier family 16 (monocarboxylic acid transporters), member 1 [Source:MGI Symbol;Acc:MGI:106013]	protein_coding	ENSG00000155380	SLC16A1	OK	48.1069	57.2547	0.25115	1.36264	0.11115	0.552937	no	52.6808	0.25115	0.25115	2	0	0	OK	25.5523	17.2215	-0.569239	-2.9117	0.00055	0.0151958	yes	21.3869	-0.569239	0.569239	2	0	0
4611	ENSMUSG00000024665	ENSMUSG00000024665	Fads2	19:10062764-10101746	fatty acid desaturase 2 [Source:MGI Symbol;Acc:MGI:1930079]	protein_coding	ENSG00000134824	FADS2	OK	54.6717	59.0824	0.111933	0.594129	0.48035	0.934722	no	56.877	0.111933	0.111933	2	0	0	OK	9.1162	17.1545	0.912081	3.40431	5e-05	0.0019768	yes	13.1353	0.912081	0.912081	2	0	0
10453	ENSMUSG00000036777	ENSMUSG00000036777	Anln	9:22332011-22389188	anillin, actin binding protein [Source:MGI Symbol;Acc:MGI:1920174]	protein_coding	ENSG00000011426	ANLN	OK	32.9763	28.626	-0.204103	-0.647213	0.41715	0.903862	no	30.8011	-0.204103	0.204103	2	0	0	OK	1.27204	17.0881	3.74777	6.77272	5e-05	0.0019768	yes	9.18007	3.74777	3.74777	1	1	1
6924	ENSMUSG00000028832	ENSMUSG00000028832	Stmn1	4:134468319-134473843	stathmin 1 [Source:MGI Symbol;Acc:MGI:96739]	protein_coding	ENSG00000117632	STMN1	OK	64.1057	62.7571	-0.0306741	-0.146798	0.86515	0.992781	no	63.4314	-0.0306741	0.0306741	2	0	0	OK	3.89348	16.8437	2.11308	5.84492	5e-05	0.0019768	yes	10.3686	2.11308	2.11308	2	1	1
148	ENSMUSG00000000861	ENSMUSG00000000861	Bcl11a	11:24078055-24174123	B cell CLL/lymphoma 11A (zinc finger protein) [Source:MGI Symbol;Acc:MGI:106190]	protein_coding	ENSG00000119866	BCL11A	OK	14.5609	17.5477	0.269187	1.05031	0.21505	0.715622	no	16.0543	0.269187	0.269187	2	0	0	OK	29.1089	16.8368	-0.789843	-3.29256	0.0001	0.00364222	yes	22.9729	-0.789843	0.789843	2	0	0
10424	ENSMUSG00000036672	ENSMUSG00000036672	Cenpt	8:105827730-105853278	centromere protein T [Source:MGI Symbol;Acc:MGI:2443939]	protein_coding	ENSG00000102901	CENPT	OK	22.2328	24.5912	0.145453	0.545812	0.5084	0.945196	no	23.412	0.145453	0.145453	2	0	0	OK	9.10134	16.8251	0.886462	2.53562	0.0026	0.0494895	yes	12.9632	0.886462	0.886462	2	0	0
3268	ENSMUSG00000021733	ENSMUSG00000021733	Slc4a7	14:14702278-14799940	solute carrier family 4, sodium bicarbonate cotransporter, member 7 [Source:MGI Symbol;Acc:MGI:2443878]	protein_coding	ENSG00000033867	SLC4A7	OK	21.8217	19.0429	-0.196513	-0.807497	0.2596	0.768301	no	20.4323	-0.196513	0.196513	2	0	0	OK	29.8485	16.6004	-0.846436	-3.67491	5e-05	0.0019768	yes	23.2245	-0.846436	0.846436	2	0	0
2602	ENSMUSG00000020590	ENSMUSG00000020590	Snx13	12:35047185-35147479	sorting nexin 13 [Source:MGI Symbol;Acc:MGI:2661416]	protein_coding	ENSG00000071189	SNX13	OK	6.50552	6.32418	-0.0407864	-0.151638	0.8493	0.992781	no	6.41485	-0.0407864	0.0407864	2	0	0	OK	25.5478	16.5837	-0.623435	-2.68692	0.0015	0.0325488	yes	21.0658	-0.623435	0.623435	2	0	0
8027	ENSMUSG00000030788	ENSMUSG00000030788	Rnf141	7:110766676-110844457	ring finger protein 141 [Source:MGI Symbol;Acc:MGI:1914400]	protein_coding	ENSG00000110315	RNF141	OK	15.5044	14.2433	-0.122397	-0.298714	0.6161	0.973536	no	14.8739	-0.122397	0.122397	2	0	0	OK	6.51337	16.5786	1.34784	3.97236	5e-05	0.0019768	yes	11.546	1.34784	1.34784	2	1	1
15908	ENSMUSG00000055240	ENSMUSG00000055240	Zfp101	17:33360506-33394641	zinc finger protein 101 [Source:MGI Symbol;Acc:MGI:107547]	protein_coding	none	NA	OK	7.84746	10.4454	0.412575	1.37595	0.0642	0.417851	no	9.14643	0.412575	0.412575	2	0	0	OK	4.46153	16.4674	1.88401	6.62691	5e-05	0.0019768	yes	10.4645	1.88401	1.88401	2	1	1
5802	ENSMUSG00000026856	ENSMUSG00000026856	Dolpp1	2:30392253-30415813	dolichyl pyrophosphate phosphatase 1 [Source:MGI Symbol;Acc:MGI:1914093]	protein_coding	ENSG00000167130	DOLPP1	OK	12.6957	15.5768	0.295065	0.867591	0.29	0.801235	no	14.1363	0.295065	0.295065	2	0	0	OK	5.88153	16.2598	1.46704	2.84929	0.00075	0.0193743	yes	11.0707	1.46704	1.46704	2	1	1
12339	ENSMUSG00000041718	ENSMUSG00000041718	Alg13	X:144317803-144374450	asparagine-linked glycosylation 13 [Source:MGI Symbol;Acc:MGI:1914824]	protein_coding	none	NA	OK	13.3969	12.6435	-0.0835077	-0.182351	0.82705	0.992781	no	13.0202	-0.0835077	0.0835077	2	0	0	OK	7.04344	16.2204	1.20346	3.44694	0.0002	0.00660246	yes	11.6319	1.20346	1.20346	2	1	1
10043	ENSMUSG00000035455	ENSMUSG00000035455	Fignl1	11:11787430-11808962	fidgetin-like 1 [Source:MGI Symbol;Acc:MGI:1890648]	protein_coding	ENSG00000132436	FIGNL1	OK	34.5974	41.1018	0.248536	1.27468	0.13135	0.592983	no	37.8496	0.248536	0.248536	2	0	0	OK	3.60908	16.0709	2.15474	7.8829	5e-05	0.0019768	yes	9.83999	2.15474	2.15474	2	1	1
4121	ENSMUSG00000023345	ENSMUSG00000023345	Poc1a	9:106281060-106350521	POC1 centriolar protein A [Source:MGI Symbol;Acc:MGI:1917485]	protein_coding	ENSG00000164087	POC1A	OK	19.4141	21.6146	0.154901	0.617323	0.46755	0.930088	no	20.5144	0.154901	0.154901	2	0	0	OK	2.15098	15.9964	2.89468	7.05998	5e-05	0.0019768	yes	9.07369	2.89468	2.89468	2	1	1
4994	ENSMUSG00000025351	ENSMUSG00000025351	Cd63	10:128900988-128912822	CD63 antigen [Source:MGI Symbol;Acc:MGI:99529]	protein_coding	ENSG00000135404	CD63	OK	0.406578	0.14781	-1.45979	-0.697745	0.12515	0.582031	no	0.277194	-1.45979	1.45979	0	1	0	OK	29.5624	15.9503	-0.890177	-2.7802	0.00185	0.0383021	yes	22.7564	-0.890177	0.890177	2	0	0
7351	ENSMUSG00000029516	ENSMUSG00000029516	Cit	5:115845277-116008947	citron [Source:MGI Symbol;Acc:MGI:105313]	protein_coding	ENSG00000122966	CIT	OK	10.7987	12.3293	0.191233	0.287551	0.54475	0.957096	no	11.564	0.191233	0.191233	2	0	0	OK	0.180039	15.8364	6.45879	3.29574	5e-05	0.0019768	yes	8.00822	6.45879	6.45879	1	1	1
9633	ENSMUSG00000034311	ENSMUSG00000034311	Kif4	X:100622882-100727214	kinesin family member 4 [Source:MGI Symbol;Acc:MGI:108389]	protein_coding	ENSG00000090889	KIF4A	OK	30.7538	31.1202	0.0170888	0.0464393	0.9575	0.994937	no	30.937	0.0170888	0.0170888	2	0	0	OK	0.783921	15.6748	4.3216	6.64152	5e-05	0.0019768	yes	8.22936	4.3216	4.3216	1	1	1
10952	ENSMUSG00000038047	ENSMUSG00000038047	Haus6	4:86578854-86612055	HAUS augmin-like complex, subunit 6 [Source:MGI Symbol;Acc:MGI:1923389]	protein_coding	ENSG00000147874	HAUS6	OK	12.856	14.0086	0.12387	0.588597	0.47965	0.934294	no	13.4323	0.12387	0.12387	2	0	0	OK	7.77213	15.6171	1.00674	4.52428	5e-05	0.0019768	yes	11.6946	1.00674	1.00674	2	1	1
8071	ENSMUSG00000030867	ENSMUSG00000030867	Plk1	7:122159438-122169873	polo like kinase 1 [Source:MGI Symbol;Acc:MGI:97621]	protein_coding	ENSG00000166851	PLK1	OK	82.207	87.5111	0.0902061	0.46936	0.57555	0.966899	no	84.859	0.0902061	0.0902061	2	0	0	OK	3.56168	15.5708	2.12821	6.51556	5e-05	0.0019768	yes	9.56624	2.12821	2.12821	2	1	1
11728	ENSMUSG00000039967	ENSMUSG00000039967	Zfp292	4:34803112-34882960	zinc finger protein 292 [Source:MGI Symbol;Acc:MGI:1353423]	protein_coding	ENSG00000188994	ZNF292	OK	9.31015	9.30934	-0.00012534	-0.000642082	0.9993	0.999778	no	9.30974	-0.00012534	0.00012534	2	0	0	OK	22.669	15.5131	-0.547234	-2.94324	0.00075	0.0193743	yes	19.091	-0.547234	0.547234	2	0	0
177	ENSMUSG00000001027	ENSMUSG00000001027	Scn4a	11:106349454-106353288	sodium channel, voltage-gated, type IV, alpha [Source:MGI Symbol;Acc:MGI:98250]	protein_coding	ENSG00000007314	SCN4A	OK	0.780124	1.00792	0.369599	1.07551	0.21375	0.714416	no	0.894022	0.369599	0.369599	0	0	0	OK	10.6804	15.419	0.529747	2.70489	0.00175	0.0366759	yes	13.0497	0.529747	0.529747	2	0	0
10821	ENSMUSG00000037725	ENSMUSG00000037725	Ckap2	8:22168159-22185819	cytoskeleton associated protein 2 [Source:MGI Symbol;Acc:MGI:1931797]	protein_coding	ENSG00000136108	CKAP2	OK	61.4388	40.2463	-0.610293	-2.54308	0.0035	0.0617265	no	50.8426	-0.610293	0.610293	2	0	0	OK	2.77893	15.3987	2.47021	6.975	5e-05	0.0019768	yes	9.08882	2.47021	2.47021	2	1	1
9004	ENSMUSG00000032501	ENSMUSG00000032501	Trib1	15:59648349-59657099	tribbles pseudokinase 1 [Source:MGI Symbol;Acc:MGI:2443397]	protein_coding	ENSG00000173334	TRIB1	OK	11.701	8.57273	-0.448802	-2.08894	0.0136	0.157813	no	10.1369	-0.448802	0.448802	2	0	0	OK	26.2163	15.2317	-0.783391	-3.94489	5e-05	0.0019768	yes	20.724	-0.783391	0.783391	2	0	0
2176	ENSMUSG00000019849	ENSMUSG00000019849	Prep	10:45067202-45167198	prolyl endopeptidase [Source:MGI Symbol;Acc:MGI:1270863]	protein_coding	ENSG00000085377	PREP	OK	13.6353	16.9488	0.31383	1.68347	0.0476	0.351643	no	15.292	0.31383	0.31383	2	0	0	OK	23.4047	15.1147	-0.630849	-3.38967	5e-05	0.0019768	yes	19.2597	-0.630849	0.630849	2	0	0
11105	ENSMUSG00000038379	ENSMUSG00000038379	Ttk	9:83834688-83872389	Ttk protein kinase [Source:MGI Symbol;Acc:MGI:1194921]	protein_coding	ENSG00000112742	TTK	OK	23.2825	23.3329	0.00312343	0.0154056	0.98585	0.997144	no	23.3077	0.00312343	0.00312343	2	0	0	OK	1.12526	15.0916	3.74542	8.14887	5e-05	0.0019768	yes	8.10843	3.74542	3.74542	1	1	1
6839	ENSMUSG00000028687	ENSMUSG00000028687	Mutyh	4:116807722-116819440	mutY DNA glycosylase [Source:MGI Symbol;Acc:MGI:1917853]	protein_coding	ENSG00000132781	MUTYH	OK	15.0221	16.8148	0.162641	0.397481	0.62345	0.97429	no	15.9184	0.162641	0.162641	2	0	0	OK	5.67148	15.0251	1.40557	3.11111	0.0003	0.00925391	yes	10.3483	1.40557	1.40557	2	1	1
6324	ENSMUSG00000027822	ENSMUSG00000027822	Slc33a1	3:63933506-63968659	solute carrier family 33 (acetyl-CoA transporter), member 1 [Source:MGI Symbol;Acc:MGI:1332247]	protein_coding	NA	NA	OK	10.5182	10.584	0.00898966	0.0391756	0.96365	0.99505	no	10.5511	0.00898966	0.00898966	2	0	0	OK	26.9458	14.8439	-0.860186	-4.1261	5e-05	0.0019768	yes	20.8948	-0.860186	0.860186	2	0	0
2249	ENSMUSG00000019992	ENSMUSG00000019992	Mtfr2	10:20347769-20361304	mitochondrial fission regulator 2 [Source:MGI Symbol;Acc:MGI:1919054]	protein_coding	ENSG00000146410	MTFR2	OK	13.4979	15.0402	0.156086	0.671637	0.42885	0.910711	no	14.2691	0.156086	0.156086	2	0	0	OK	1.18961	14.8363	3.64057	9.75398	5e-05	0.0019768	yes	8.01295	3.64057	3.64057	1	1	1
3502	ENSMUSG00000022136	ENSMUSG00000022136	Dnajc3	14:118937975-118981697	DnaJ heat shock protein family (Hsp40) member C3 [Source:MGI Symbol;Acc:MGI:107373]	protein_coding	ENSG00000102580	DNAJC3	OK	20.3648	23.4884	0.205869	1.07513	0.20755	0.70599	no	21.9266	0.205869	0.205869	2	0	0	OK	21.7845	14.7063	-0.566867	-2.91203	0.00095	0.0233132	yes	18.2454	-0.566867	0.566867	2	0	0
5913	ENSMUSG00000027075	ENSMUSG00000027075	Slc43a1	2:84838849-84863594	solute carrier family 43, member 1 [Source:MGI Symbol;Acc:MGI:1931352]	protein_coding	ENSG00000149150	SLC43A1	OK	14.0501	16.8906	0.265643	1.03566	0.218	0.719234	no	15.4703	0.265643	0.265643	2	0	0	OK	25.1382	14.6912	-0.774929	-2.88356	0.00205	0.0413208	yes	19.9147	-0.774929	0.774929	2	0	0
20328	ENSMUSG00000072980	ENSMUSG00000072980	Oip5	2:119609511-119651244	Opa interacting protein 5 [Source:MGI Symbol;Acc:MGI:1917895]	protein_coding	ENSG00000104147	OIP5	OK	24.4618	20.8458	-0.230772	-0.42431	0.6141	0.973534	no	22.6538	-0.230772	0.230772	2	0	0	OK	0.576667	14.6847	4.67043	6.0834	0.0004	0.0117599	yes	7.63068	4.67043	4.67043	1	1	1
7612	ENSMUSG00000030051	ENSMUSG00000030051	Aplf	6:87628423-87672193	aprataxin and PNKP like factor [Source:MGI Symbol;Acc:MGI:1919353]	protein_coding	ENSG00000169621	APLF	OK	9.79417	7.69438	-0.348118	-1.27189	0.136	0.598366	no	8.74428	-0.348118	0.348118	2	0	0	OK	3.4787	14.6574	2.07501	6.96095	5e-05	0.0019768	yes	9.06805	2.07501	2.07501	2	1	1
626	ENSMUSG00000003746	ENSMUSG00000003746	Man1a	10:53904784-54081081	mannosidase 1, alpha [Source:MGI Symbol;Acc:MGI:104677]	protein_coding	ENSG00000111885	MAN1A1	OK	10.1697	11.0889	0.124832	0.583752	0.479	0.933866	no	10.6293	0.124832	0.124832	2	0	0	OK	23.7859	14.5147	-0.71259	-3.58914	5e-05	0.0019768	yes	19.1503	-0.71259	0.71259	2	0	0
8546	ENSMUSG00000031756	ENSMUSG00000031756	Cenpn	8:116921729-116941507	centromere protein N [Source:MGI Symbol;Acc:MGI:1919405]	protein_coding	ENSG00000166451	CENPN	OK	27.5684	32.3333	0.230007	1.01139	0.21205	0.712067	no	29.9509	0.230007	0.230007	2	0	0	OK	1.99632	14.3309	2.84371	7.80234	5e-05	0.0019768	yes	8.16361	2.84371	2.84371	1	1	1
8781	ENSMUSG00000032113	ENSMUSG00000032113	Chek1	9:36708481-36727065	checkpoint kinase 1 [Source:MGI Symbol;Acc:MGI:1202065]	protein_coding	ENSG00000149554	CHEK1	OK	32.3635	40.37	0.318915	0.776043	0.33975	0.847018	no	36.3667	0.318915	0.318915	2	0	0	OK	3.6284	14.2284	1.97137	3.11959	0.0001	0.00364222	yes	8.9284	1.97137	1.97137	2	1	1
2919	ENSMUSG00000021108	ENSMUSG00000021108	Prkch	12:73584795-73778185	protein kinase C, eta [Source:MGI Symbol;Acc:MGI:97600]	protein_coding	NA	NA	OK	46.9814	41.6396	-0.174135	-0.926825	0.272	0.782385	no	44.3105	-0.174135	0.174135	2	0	0	OK	23.7679	13.9889	-0.764729	-3.75302	5e-05	0.0019768	yes	18.8784	-0.764729	0.764729	2	0	0
20370	ENSMUSG00000073139	ENSMUSG00000073139	Tmem185a	X:70459752-70477180	transmembrane protein 185A [Source:MGI Symbol;Acc:MGI:2448555]	protein_coding	ENSG00000269556	TMEM185A	OK	17.4046	11.6178	-0.583123	-1.82544	0.0315	0.276947	no	14.5112	-0.583123	0.583123	2	0	0	OK	29.9996	13.9244	-1.10733	-3.68423	5e-05	0.0019768	yes	21.962	-1.10733	1.10733	2	1	1
6964	ENSMUSG00000028893	ENSMUSG00000028893	Sesn2	4:132492031-132510501	sestrin 2 [Source:MGI Symbol;Acc:MGI:2651874]	protein_coding	ENSG00000130766	SESN2	OK	14.2246	9.49219	-0.583579	-2.6906	0.0023	0.0452288	yes	11.8584	-0.583579	0.583579	2	0	0	OK	9.17943	13.8482	0.593226	2.72015	0.0015	0.0325488	yes	11.5138	0.593226	0.593226	2	0	0
14368	ENSMUSG00000048807	ENSMUSG00000048807	Slc35e4	11:3907020-3914664	solute carrier family 35, member E4 [Source:MGI Symbol;Acc:MGI:2144150]	protein_coding	ENSG00000100036	SLC35E4	OK	5.99201	6.83598	0.190106	0.751665	0.3798	0.878107	no	6.41399	0.190106	0.190106	2	0	0	OK	8.84164	13.8363	0.646073	2.88549	0.0011	0.0259231	yes	11.339	0.646073	0.646073	2	0	0
5324	ENSMUSG00000026039	ENSMUSG00000026039	Sgo2a	1:57955100-58025899	shugoshin 2A [Source:MGI Symbol;Acc:MGI:1098767]	protein_coding	NA	NA	OK	11.6048	10.9712	-0.081002	-0.334708	0.7011	0.9864	no	11.288	-0.081002	0.081002	2	0	0	OK	0.729537	13.6706	4.22795	8.55306	5e-05	0.0019768	yes	7.20007	4.22795	4.22795	1	1	1
11938	ENSMUSG00000040520	ENSMUSG00000040520	Manea	4:26324505-26346891	mannosidase, endo-alpha [Source:MGI Symbol;Acc:MGI:2444484]	protein_coding	ENSG00000172469	MANEA	OK	8.72485	8.20554	-0.0885316	-0.339103	0.64125	0.977381	no	8.46519	-0.0885316	0.0885316	2	0	0	OK	23.8534	13.6334	-0.807049	-3.91268	5e-05	0.0019768	yes	18.7434	-0.807049	0.807049	2	0	0
12435	ENSMUSG00000042029	ENSMUSG00000042029	Ncapg2	12:116405401-116463731	non-SMC condensin II complex, subunit G2 [Source:MGI Symbol;Acc:MGI:1923294]	protein_coding	ENSG00000146918	NCAPG2	OK	28.4591	33.4021	0.231048	1.01547	0.1654	0.640682	no	30.9306	0.231048	0.231048	2	0	0	OK	1.78082	13.5883	2.93175	8.24356	5e-05	0.0019768	yes	7.68456	2.93175	2.93175	1	1	1
22569	ENSMUSG00000078851	ENSMUSG00000078851	Hist3h2a	11:58954684-58978050	histone cluster 3, H2a [Source:MGI Symbol;Acc:MGI:2448458]	protein_coding	ENSG00000181218	HIST3H2A	OK	7.55439	3.14163	-1.2658	-3.67012	0.0003	0.00925391	yes	5.34801	-1.2658	1.2658	2	1	1	OK	23.591	13.4779	-0.807643	-3.24979	0.00035	0.0105257	yes	18.5344	-0.807643	0.807643	2	0	0
5656	ENSMUSG00000026622	ENSMUSG00000026622	Nek2	1:191820369-191833050	NIMA (never in mitosis gene a)-related expressed kinase 2 [Source:MGI Symbol;Acc:MGI:109359]	protein_coding	ENSG00000117650	NEK2	OK	27.875	28.9796	0.0560667	0.144792	0.8657	0.992781	no	28.4273	0.0560667	0.0560667	2	0	0	OK	1.06224	13.29	3.64516	5.92335	5e-05	0.0019768	yes	7.17612	3.64516	3.64516	1	1	1
10232	ENSMUSG00000036067	ENSMUSG00000036067	Slc2a6	2:27021362-27027998	solute carrier family 2 (facilitated glucose transporter), member 6 [Source:MGI Symbol;Acc:MGI:2443286]	protein_coding	ENSG00000160326	SLC2A6	OK	4.567	4.32882	-0.0772706	-0.224231	0.78475	0.992781	no	4.44791	-0.0772706	0.0772706	2	0	0	OK	7.97385	13.1571	0.72249	2.85419	0.001	0.0241412	yes	10.5655	0.72249	0.72249	2	0	0
3633	ENSMUSG00000022364	ENSMUSG00000022364	Tbc1d31	15:57912198-57970067	TBC1 domain family, member 31 [Source:MGI Symbol;Acc:MGI:2684931]	protein_coding	ENSG00000156787	TBC1D31	OK	27.7565	18.9453	-0.550991	-2.04	0.0164	0.180046	no	23.3509	-0.550991	0.550991	2	0	0	OK	4.10567	13.0652	1.67004	4.8786	5e-05	0.0019768	yes	8.58544	1.67004	1.67004	2	1	1
8101	ENSMUSG00000030929	ENSMUSG00000030929	Eri2	7:119760922-119848943	exoribonuclease 2 [Source:MGI Symbol;Acc:MGI:1918401]	protein_coding	ENSG00000196678	ERI2	OK	14.2912	11.7676	-0.280313	-0.998436	0.22055	0.722422	no	13.0294	-0.280313	0.280313	2	0	0	OK	6.51741	12.7551	0.968703	3.0753	0.00075	0.0193743	yes	9.63626	0.968703	0.968703	2	0	0
1086	ENSMUSG00000007080	ENSMUSG00000007080	Pole	5:110286305-110337474	polymerase (DNA directed), epsilon [Source:MGI Symbol;Acc:MGI:1196391]	protein_coding	ENSG00000177084	POLE	OK	32.2072	37.198	0.207844	0.819056	0.33555	0.843818	no	34.7026	0.207844	0.207844	2	0	0	OK	2.79803	12.7409	2.18699	5.27496	5e-05	0.0019768	yes	7.76947	2.18699	2.18699	2	1	1
9892	ENSMUSG00000035024	ENSMUSG00000035024	Ncapd3	9:27030174-27095315	non-SMC condensin II complex, subunit D3 [Source:MGI Symbol;Acc:MGI:2142989]	protein_coding	ENSG00000151503	NCAPD3	OK	37.8314	31.1422	-0.280714	-1.28992	0.13305	0.595546	no	34.4868	-0.280714	0.280714	2	0	0	OK	6.20494	12.7388	1.03774	3.97835	5e-05	0.0019768	yes	9.47187	1.03774	1.03774	2	1	1
10733	ENSMUSG00000037474	ENSMUSG00000037474	Dtl	1:191537355-191575544	denticleless E3 ubiquitin protein ligase [Source:MGI Symbol;Acc:MGI:1924093]	protein_coding	ENSG00000143476	DTL	OK	22.4626	33.8011	0.58955	3.08252	0.00055	0.0151958	yes	28.1319	0.58955	0.58955	2	0	0	OK	0.80681	12.6932	3.97569	12.2147	5e-05	0.0019768	yes	6.75	3.97569	3.97569	1	1	1
8796	ENSMUSG00000032135	ENSMUSG00000032135	Mcam	9:44122185-44142727	melanoma cell adhesion molecule [Source:MGI Symbol;Acc:MGI:1933966]	protein_coding	ENSG00000076706	AP002956.1	NOTEST	0.260252	0.266883	0.0362985	0	1	1	no	0.263567	0.0362985	0.0362985	0	0	0	OK	4.99744	12.6555	1.34051	4.84432	5e-05	0.0019768	yes	8.82647	1.34051	1.34051	2	1	1
6030	ENSMUSG00000027306	ENSMUSG00000027306	Nusap1	2:119609511-119651244	nucleolar and spindle associated protein 1 [Source:MGI Symbol;Acc:MGI:2675669]	protein_coding	ENSG00000137804	NUSAP1	OK	67.2195	64.1226	-0.0680453	-0.338558	0.6877	0.984463	no	65.6711	-0.0680453	0.0680453	2	0	0	OK	2.20948	12.645	2.51679	6.38541	5e-05	0.0019768	yes	7.42724	2.51679	2.51679	2	1	1
4887	ENSMUSG00000025154	ENSMUSG00000025154	Arhgap19	19:41766587-41802047	Rho GTPase activating protein 19 [Source:MGI Symbol;Acc:MGI:1918335]	protein_coding	ENSG00000213390	ARHGAP19	OK	24.2932	30.3791	0.322525	1.70549	0.0422	0.329802	no	27.3361	0.322525	0.322525	2	0	0	OK	0.976314	12.341	3.65997	12.2551	5e-05	0.0019768	yes	6.65866	3.65997	3.65997	1	1	1
17489	ENSMUSG00000062510	ENSMUSG00000062510	Nsl1	1:191063011-191086474	NSL1, MIS12 kinetochore complex component [Source:MGI Symbol;Acc:MGI:2685830]	protein_coding	ENSG00000117697	NSL1	OK	11.1944	15.0209	0.424194	1.24185	0.1379	0.599714	no	13.1076	0.424194	0.424194	2	0	0	OK	0.569536	12.3379	4.43717	7.10749	5e-05	0.0019768	yes	6.45372	4.43717	4.43717	1	1	1
17426	ENSMUSG00000062210	ENSMUSG00000062210	Tnfaip8	18:49979426-50107173	tumor necrosis factor, alpha-induced protein 8 [Source:MGI Symbol;Acc:MGI:2147191]	protein_coding	ENSG00000145779	TNFAIP8	OK	40.8981	44.7456	0.12971	0.470998	0.5773	0.967506	no	42.8218	0.12971	0.12971	2	0	0	OK	23.5372	12.3006	-0.93621	-2.82466	0.00125	0.0282769	yes	17.9189	-0.93621	0.93621	2	0	0
10142	ENSMUSG00000035778	ENSMUSG00000035778	Ggta1	2:35400178-35463231	glycoprotein galactosyltransferase alpha 1, 3 [Source:MGI Symbol;Acc:MGI:95704]	protein_coding	none	NA	OK	25.1757	29.1274	0.210347	0.963256	0.24075	0.748478	no	27.1516	0.210347	0.210347	2	0	0	OK	19.915	12.1643	-0.711206	-2.60362	0.00045	0.0129202	yes	16.0397	-0.711206	0.711206	2	0	0
12590	ENSMUSG00000042462	ENSMUSG00000042462	Dctpp1	7:127256958-127260709	dCTP pyrophosphatase 1 [Source:MGI Symbol;Acc:MGI:1913672]	protein_coding	ENSG00000179958	DCTPP1	OK	109.943	137.839	0.326235	1.60779	0.0641	0.417308	no	123.891	0.326235	0.326235	2	0	0	OK	5.20601	12.1327	1.22065	3.11644	0.0016	0.0341927	yes	8.66935	1.22065	1.22065	2	1	1
2065	ENSMUSG00000019214	ENSMUSG00000019214	Chtf18	17:25717170-25727419	CTF18, chromosome transmission fidelity factor 18 [Source:MGI Symbol;Acc:MGI:2384887]	protein_coding	ENSG00000127586	CHTF18	OK	24.2205	26.1132	0.108555	0.257544	0.7583	0.99264	no	25.1669	0.108555	0.108555	2	0	0	OK	1.85237	12.1061	2.70829	3.76269	0.00045	0.0129202	yes	6.97924	2.70829	2.70829	1	1	1
3462	ENSMUSG00000022070	ENSMUSG00000022070	Bora	14:99046221-99074540	bora, aurora kinase A activator [Source:MGI Symbol;Acc:MGI:1924994]	protein_coding	ENSG00000136122	BORA	OK	43.4521	31.4107	-0.46817	-2.19776	0.00935	0.12348	no	37.4314	-0.46817	0.46817	2	0	0	OK	5.49992	12.0416	1.13054	4.08751	5e-05	0.0019768	yes	8.77076	1.13054	1.13054	2	1	1
7062	ENSMUSG00000029050	ENSMUSG00000029050	Ski	4:155154074-155222592	ski sarcoma viral oncogene homolog (avian) [Source:MGI Symbol;Acc:MGI:98310]	protein_coding	ENSG00000157933	SKI	OK	9.32532	11.0128	0.239958	1.14605	0.1825	0.668113	no	10.1691	0.239958	0.239958	2	0	0	OK	17.5466	11.9841	-0.550072	-2.72237	0.0013	0.0291624	yes	14.7654	-0.550072	0.550072	2	0	0
1572	ENSMUSG00000015217	ENSMUSG00000015217	Hmgb3	X:71555917-71560676	high mobility group box 3 [Source:MGI Symbol;Acc:MGI:1098219]	protein_coding	ENSG00000029993	HMGB3	OK	29.0443	34.3708	0.24293	1.0013	0.23735	0.74348	no	31.7076	0.24293	0.24293	2	0	0	OK	4.69441	11.949	1.34788	3.84801	5e-05	0.0019768	yes	8.3217	1.34788	1.34788	2	1	1
7039	ENSMUSG00000029009	ENSMUSG00000029009	Mthfr	4:148039076-148059551	methylenetetrahydrofolate reductase [Source:MGI Symbol;Acc:MGI:106639]	protein_coding	ENSG00000177000	MTHFR	OK	7.8421	4.97254	-0.657256	-1.89034	0.02515	0.239156	no	6.40732	-0.657256	0.657256	2	0	0	OK	6.70856	11.8138	0.816403	2.66714	0.0025	0.0482205	yes	9.26118	0.816403	0.816403	2	0	0
2078	ENSMUSG00000019312	ENSMUSG00000019312	Grb7	11:98446393-98455373	growth factor receptor bound protein 7 [Source:MGI Symbol;Acc:MGI:102683]	protein_coding	ENSG00000141738	GRB7	OK	12.9868	13.0184	0.00350525	0.0126862	0.9883	0.997456	no	13.0026	0.00350525	0.00350525	2	0	0	OK	6.56757	11.768	0.841439	2.93481	0.00065	0.017298	yes	9.16779	0.841439	0.841439	2	0	0
2555	ENSMUSG00000020493	ENSMUSG00000020493	Prr11	11:87089152-87108708	proline rich 11 [Source:MGI Symbol;Acc:MGI:2444496]	protein_coding	ENSG00000068489	PRR11	OK	28.1933	24.3815	-0.209566	-1.08447	0.20195	0.697711	no	26.2874	-0.209566	0.209566	2	0	0	OK	1.83506	11.7507	2.67884	9.69734	5e-05	0.0019768	yes	6.79288	2.67884	2.67884	1	1	1
14788	ENSMUSG00000050410	ENSMUSG00000050410	Tcf19	17:35512733-35516824	transcription factor 19 [Source:MGI Symbol;Acc:MGI:103180]	protein_coding	ENSG00000137310	TCF19	OK	29.31	41.6442	0.506725	2.42955	0.0047	0.0764604	no	35.4771	0.506725	0.506725	2	0	0	OK	4.89514	11.7355	1.26145	4.1973	5e-05	0.0019768	yes	8.31532	1.26145	1.26145	2	1	1
7934	ENSMUSG00000030641	ENSMUSG00000030641	Ddias	7:92857524-92874247	DNA damage-induced apoptosis suppressor [Source:MGI Symbol;Acc:MGI:1921291]	protein_coding	ENSG00000165490	DDIAS	OK	5.7602	6.67647	0.212968	0.495281	0.4914	0.93874	no	6.21833	0.212968	0.212968	2	0	0	OK	1.41915	11.5909	3.02989	8.48302	5e-05	0.0019768	yes	6.50502	3.02989	3.02989	1	1	1
8985	ENSMUSG00000032477	ENSMUSG00000032477	Cdc25a	9:109875578-109893895	cell division cycle 25A [Source:MGI Symbol;Acc:MGI:103198]	protein_coding	ENSG00000164045	CDC25A	OK	22.067	29.9378	0.440081	1.73234	0.01835	0.193943	no	26.0024	0.440081	0.440081	2	0	0	OK	5.6216	11.5809	1.0427	2.93984	0.00105	0.0250588	yes	8.60125	1.0427	1.0427	2	1	1
7652	ENSMUSG00000030110	ENSMUSG00000030110	Ret	6:118151744-118197718	ret proto-oncogene [Source:MGI Symbol;Acc:MGI:97902]	protein_coding	ENSG00000165731	RET	NOTEST	0.282111	0.160765	-0.811308	0	1	1	no	0.221438	-0.811308	0.811308	0	0	0	OK	21.9543	11.5281	-0.929354	-4.56046	5e-05	0.0019768	yes	16.7412	-0.929354	0.929354	2	0	0
1772	ENSMUSG00000017146	ENSMUSG00000017146	Brca1	11:101488763-101551955	breast cancer 1, early onset [Source:MGI Symbol;Acc:MGI:104537]	protein_coding	ENSG00000012048	BRCA1	OK	9.13553	12.1176	0.407541	1.27962	0.05755	0.390764	no	10.6266	0.407541	0.407541	2	0	0	OK	1.22173	11.4782	3.2319	5.27123	5e-05	0.0019768	yes	6.34996	3.2319	3.2319	1	1	1
16006	ENSMUSG00000055760	ENSMUSG00000055760	Gemin6	17:80224440-80228497	gem nuclear organelle associated protein 6 [Source:MGI Symbol;Acc:MGI:1914492]	protein_coding	ENSG00000152147	GEMIN6	OK	24.7651	26.6331	0.104915	0.442022	0.6011	0.97297	no	25.6991	0.104915	0.104915	2	0	0	OK	5.6586	11.4769	1.02022	3.08151	0.00055	0.0151958	yes	8.56775	1.02022	1.02022	2	1	1
10997	ENSMUSG00000038151	ENSMUSG00000038151	Prdm1	10:44437176-44528501	PR domain containing 1, with ZNF domain [Source:MGI Symbol;Acc:MGI:99655]	protein_coding	ENSG00000057657	PRDM1	OK	0.635515	0.930497	0.550076	1.28334	0.1152	0.561548	no	0.783006	0.550076	0.550076	0	0	0	OK	32.1803	11.3158	-1.50784	-7.52541	5e-05	0.0019768	yes	21.748	-1.50784	1.50784	2	1	1
18979	ENSMUSG00000066324	ENSMUSG00000066324	Impad1	4:4762483-4793355	inositol monophosphatase domain containing 1 [Source:MGI Symbol;Acc:MGI:1915720]	protein_coding	ENSG00000104331	IMPAD1	OK	11.2071	13.2753	0.244331	1.24396	0.14815	0.608719	no	12.2412	0.244331	0.244331	2	0	0	OK	16.7569	11.1757	-0.584398	-2.99785	0.0006	0.016251	yes	13.9663	-0.584398	0.584398	2	0	0
10286	ENSMUSG00000036223	ENSMUSG00000036223	Ska1	18:74195298-74207818	spindle and kinetochore associated complex subunit 1 [Source:MGI Symbol;Acc:MGI:1913718]	protein_coding	ENSG00000154839	SKA1	OK	16.4904	18.4274	0.160231	0.639055	0.44655	0.920881	no	17.4589	0.160231	0.160231	2	0	0	OK	0.504865	11.0736	4.45508	9.08657	5e-05	0.0019768	yes	5.78923	4.45508	4.45508	1	1	1
15093	ENSMUSG00000051517	ENSMUSG00000051517	Arhgef39	4:43496141-43499695	Rho guanine nucleotide exchange factor (GEF) 39 [Source:MGI Symbol;Acc:MGI:3036286]	protein_coding	ENSG00000137135	ARHGEF39	OK	46.1472	37.5939	-0.295743	-1.22947	0.14665	0.607095	no	41.8705	-0.295743	0.295743	2	0	0	OK	2.52525	11.0292	2.12683	4.64033	5e-05	0.0019768	yes	6.77722	2.12683	2.12683	2	1	1
15009	ENSMUSG00000051235	ENSMUSG00000051235	Gen1	12:11238919-11265801	GEN1, Holliday junction 5' flap endonuclease [Source:MGI Symbol;Acc:MGI:2443149]	protein_coding	ENSG00000178295	GEN1	OK	10.699	13.4643	0.331659	1.0188	0.11565	0.562672	no	12.0816	0.331659	0.331659	2	0	0	OK	1.31371	10.9275	3.05624	6.77589	5e-05	0.0019768	yes	6.12061	3.05624	3.05624	1	1	1
9801	ENSMUSG00000034773	ENSMUSG00000034773	BC030867	11:102248881-102265187	cDNA sequence BC030867 [Source:MGI Symbol;Acc:MGI:2387601]	protein_coding	ENSG00000125319	C17orf53	OK	11.7165	10.9108	-0.102792	-0.368441	0.66325	0.980158	no	11.3136	-0.102792	0.102792	2	0	0	OK	0.28374	10.8416	5.25587	5.94098	5e-05	0.0019768	yes	5.56267	5.25587	5.25587	1	1	1
4819	ENSMUSG00000025014	ENSMUSG00000025014	Dntt	19:41029274-41059525	deoxynucleotidyltransferase, terminal [Source:MGI Symbol;Acc:MGI:98659]	protein_coding	ENSG00000107447	DNTT	OK	0.88335	0.358378	-1.3015	-2.2689	0.00955	0.124981	no	0.620864	-1.3015	1.3015	0	1	0	OK	35.3481	10.7125	-1.72234	-7.35748	5e-05	0.0019768	yes	23.0303	-1.72234	1.72234	2	1	1
31836	ENSMUSG00000092118	ENSMUSG00000092118	Fancf	7:51860576-51994975	Fanconi anemia, complementation group F [Source:MGI Symbol;Acc:MGI:3689889]	protein_coding	ENSG00000183161	FANCF	OK	5.89612	5.54574	-0.088385	-0.204626	0.81355	0.992781	no	5.72093	-0.088385	0.088385	2	0	0	OK	4.73511	10.6264	1.16618	3.51672	5e-05	0.0019768	yes	7.68075	1.16618	1.16618	2	1	1
1865	ENSMUSG00000017861	ENSMUSG00000017861	Mybl2	2:163054686-163084688	myeloblastosis oncogene-like 2 [Source:MGI Symbol;Acc:MGI:101785]	protein_coding	ENSG00000101057	MYBL2	OK	50.3078	73.0873	0.538839	1.72602	0.03825	0.312979	no	61.6975	0.538839	0.538839	2	0	0	OK	3.32844	10.5826	1.66877	3.2464	0.00035	0.0105257	yes	6.95552	1.66877	1.66877	2	1	1
14841	ENSMUSG00000050628	ENSMUSG00000050628	Ubald2	11:116434093-116439077	UBA-like domain containing 2 [Source:MGI Symbol;Acc:MGI:1914635]	protein_coding	ENSG00000185262	UBALD2	OK	30.429	22.902	-0.409971	-1.85543	0.0287	0.26053	no	26.6655	-0.409971	0.409971	2	0	0	OK	6.02914	10.5487	0.80704	2.72844	0.0015	0.0325488	yes	8.28892	0.80704	0.80704	2	0	0
6325	ENSMUSG00000027823	ENSMUSG00000027823	Gmps	3:63976105-64022579	guanine monophosphate synthetase [Source:MGI Symbol;Acc:MGI:2448526]	protein_coding	ENSG00000163655	GMPS	OK	17.3122	19.2844	0.155642	0.830735	0.324	0.833156	no	18.2983	0.155642	0.155642	2	0	0	OK	15.0922	10.5342	-0.518714	-2.68941	0.0014	0.0309503	yes	12.8132	-0.518714	0.518714	2	0	0
12207	ENSMUSG00000041313	ENSMUSG00000041313	Slc7a1	5:148327409-148399904	solute carrier family 7 (cationic amino acid transporter, y+ system), member 1 [Source:MGI Symbol;Acc:MGI:88117]	protein_coding	ENSG00000139514	SLC7A1	OK	22.7551	22.0239	-0.0471171	-0.234173	0.7624	0.99264	no	22.3895	-0.0471171	0.0471171	2	0	0	OK	5.14254	10.5227	1.03295	4.76663	5e-05	0.0019768	yes	7.83262	1.03295	1.03295	2	1	1
10038	ENSMUSG00000035441	ENSMUSG00000035441	Myo1d	11:80482125-80780025	myosin ID [Source:MGI Symbol;Acc:MGI:107728]	protein_coding	ENSG00000176658	MYO1D	OK	0.544815	0.253166	-1.10568	-2.19876	0.0135	0.157105	no	0.398991	-1.10568	1.10568	0	1	0	OK	15.3796	10.4734	-0.554295	-2.68456	0.00205	0.0413208	yes	12.9265	-0.554295	0.554295	2	0	0
5569	ENSMUSG00000026475	ENSMUSG00000026475	Rgs16	1:153740348-153749324	regulator of G-protein signaling 16 [Source:MGI Symbol;Acc:MGI:108407]	protein_coding	ENSG00000143333	RGS16	OK	5.98664	2.21842	-1.43221	-4.43871	5e-05	0.0019768	yes	4.10253	-1.43221	1.43221	2	1	1	OK	24.642	10.4102	-1.24312	-5.55186	5e-05	0.0019768	yes	17.5261	-1.24312	1.24312	2	1	1
19373	ENSMUSG00000068394	ENSMUSG00000068394	Cep152	2:125563087-125625113	centrosomal protein 152 [Source:MGI Symbol;Acc:MGI:2139083]	protein_coding	ENSG00000103995	CEP152	OK	6.74472	8.24443	0.28966	1.36424	0.1156	0.562574	no	7.49457	0.28966	0.28966	2	0	0	OK	3.80864	10.3648	1.44435	6.4776	5e-05	0.0019768	yes	7.08672	1.44435	1.44435	2	1	1
6046	ENSMUSG00000027331	ENSMUSG00000027331	Knstrn	2:118814002-118853957	kinetochore-localized astrin/SPAG5 binding [Source:MGI Symbol;Acc:MGI:1289298]	protein_coding	ENSG00000128944	KNSTRN	OK	81.9854	37.3107	-1.13578	-3.91531	5e-05	0.0019768	yes	59.648	-1.13578	1.13578	2	1	1	OK	1.88712	10.3616	2.45699	4.90696	5e-05	0.0019768	yes	6.12436	2.45699	2.45699	1	1	1
16740	ENSMUSG00000059142	ENSMUSG00000059142	Zfp945	17:22846696-22867134	zinc finger protein 945 [Source:MGI Symbol;Acc:MGI:2445132]	protein_coding	NA	NA	OK	4.5514	3.60242	-0.337344	-1.28812	0.13255	0.595162	no	4.07691	-0.337344	0.337344	2	0	0	OK	16.4853	10.3437	-0.672427	-3.18404	5e-05	0.0019768	yes	13.4145	-0.672427	0.672427	2	0	0
6042	ENSMUSG00000027326	ENSMUSG00000027326	Knl1	2:119047118-119105501	kinetochore scaffold 1 [Source:MGI Symbol;Acc:MGI:1923714]	protein_coding	ENSG00000137812	KNL1	OK	11.1431	13.2453	0.249328	1.04476	0.1432	0.603696	no	12.1942	0.249328	0.249328	2	0	0	OK	0.696101	10.3394	3.89272	7.17023	5e-05	0.0019768	yes	5.51775	3.89272	3.89272	1	1	1
22385	ENSMUSG00000078348	ENSMUSG00000078348	Sf3b5	10:13005342-13009183	splicing factor 3b, subunit 5 [Source:MGI Symbol;Acc:MGI:1913375]	protein_coding	ENSG00000169976	SF3B5	OK	18.5577	18.353	-0.0160001	-0.0802503	0.9264	0.993025	no	18.4554	-0.0160001	0.0160001	2	0	0	OK	6.26485	10.2463	0.709754	3.12257	0.00015	0.00513825	yes	8.25558	0.709754	0.709754	2	0	0
6791	ENSMUSG00000028614	ENSMUSG00000028614	Ndc1	4:107367783-107416346	NDC1 transmembrane nucleoporin [Source:MGI Symbol;Acc:MGI:1920037]	protein_coding	ENSG00000058804	NDC1	OK	19.1256	25.4442	0.411829	2.09638	0.01335	0.15597	no	22.2849	0.411829	0.411829	2	0	0	OK	2.48576	10.241	2.04259	7.28269	5e-05	0.0019768	yes	6.36338	2.04259	2.04259	2	1	1
8501	ENSMUSG00000031669	ENSMUSG00000031669	Gins3	8:95633452-95645060	GINS complex subunit 3 (Psf3 homolog) [Source:MGI Symbol;Acc:MGI:1926083]	protein_coding	ENSG00000181938	GINS3	OK	7.86095	9.08576	0.208904	0.837288	0.32355	0.832795	no	8.47335	0.208904	0.208904	2	0	0	OK	2.84076	10.1167	1.83239	6.23714	5e-05	0.0019768	yes	6.47873	1.83239	1.83239	2	1	1
10162	ENSMUSG00000035842	ENSMUSG00000035842	Ddx11	17:66123519-66152174	DEAD/H (Asp-Glu-Ala-Asp/His) box helicase 11 [Source:MGI Symbol;Acc:MGI:2443590]	protein_coding	ENSG00000013573	DDX11	OK	16.1165	18.5769	0.204972	0.632072	0.43015	0.911417	no	17.3467	0.204972	0.204972	2	0	0	OK	3.99545	10.0424	1.32968	3.45463	5e-05	0.0019768	yes	7.01893	1.32968	1.32968	2	1	1
12138	ENSMUSG00000041064	ENSMUSG00000041064	Pif1	9:65587159-65595967	PIF1 5'-to-3' DNA helicase [Source:MGI Symbol;Acc:MGI:2143057]	protein_coding	ENSG00000140451	PIF1	OK	23.8495	24.607	0.0451111	0.14155	0.83075	0.992781	no	24.2282	0.0451111	0.0451111	2	0	0	OK	0.551242	9.94358	4.17301	4.55303	5e-05	0.0019768	yes	5.24741	4.17301	4.17301	1	1	1
1875	ENSMUSG00000018001	ENSMUSG00000018001	Cyth3	5:143622446-143710250	cytohesin 3 [Source:MGI Symbol;Acc:MGI:1335107]	protein_coding	ENSG00000008256	CYTH3	OK	3.98332	3.59924	-0.14628	-0.407302	0.5652	0.964168	no	3.79128	-0.14628	0.14628	2	0	0	OK	14.5563	9.64439	-0.593879	-2.35061	0.00165	0.0349961	yes	12.1003	-0.593879	0.593879	2	0	0
14079	ENSMUSG00000047757	ENSMUSG00000047757	Fancb	X:164980591-164997272	Fanconi anemia, complementation group B [Source:MGI Symbol;Acc:MGI:2448558]	protein_coding	ENSG00000181544	FANCB	OK	6.61179	8.174	0.306001	1.25245	0.139	0.599719	no	7.39289	0.306001	0.306001	2	0	0	OK	2.9319	9.60481	1.71192	6.18694	5e-05	0.0019768	yes	6.26836	1.71192	1.71192	2	1	1
11962	ENSMUSG00000040569	ENSMUSG00000040569	Slc26a7	4:14502429-14621805	solute carrier family 26, member 7 [Source:MGI Symbol;Acc:MGI:2384791]	protein_coding	ENSG00000147606	SLC26A7	NOTEST	0.0392757	0.0717302	0.868943	0	1	1	no	0.0555029	0.868943	0.868943	0	0	0	OK	14.738	9.60098	-0.618289	-2.6545	0.00085	0.0213895	yes	12.1695	-0.618289	0.618289	2	0	0
10115	ENSMUSG00000035683	ENSMUSG00000035683	Melk	4:44300875-44364675	maternal embryonic leucine zipper kinase [Source:MGI Symbol;Acc:MGI:106924]	protein_coding	ENSG00000165304	MELK	OK	13.1311	12.5259	-0.0680813	-0.309463	0.71105	0.987902	no	12.8285	-0.0680813	0.0680813	2	0	0	OK	0.700264	9.43715	3.75238	6.9049	5e-05	0.0019768	yes	5.06871	3.75238	3.75238	1	1	1
19426	ENSMUSG00000068744	ENSMUSG00000068744	Psrc1	3:108383838-108388231	proline/serine-rich coiled-coil 1 [Source:MGI Symbol;Acc:MGI:1913099]	protein_coding	ENSG00000134222	PSRC1	OK	25.2458	30.8114	0.287422	1.07873	0.2014	0.697262	no	28.0286	0.287422	0.287422	2	0	0	OK	0.64112	9.28037	3.85552	5.57584	5e-05	0.0019768	yes	4.96075	3.85552	3.85552	1	1	1
11809	ENSMUSG00000040183	ENSMUSG00000040183	Ankrd6	4:32804034-32950841	ankyrin repeat domain 6 [Source:MGI Symbol;Acc:MGI:2154278]	protein_coding	ENSG00000135299	ANKRD6	OK	1.62532	0.730901	-1.15298	-2.47761	0.0011	0.0259231	yes	1.17811	-1.15298	1.15298	0	1	0	OK	20.6163	9.26069	-1.1546	-5.20919	5e-05	0.0019768	yes	14.9385	-1.1546	1.1546	2	1	1
9438	ENSMUSG00000033762	ENSMUSG00000033762	Recql4	15:76701464-76710548	RecQ protein-like 4 [Source:MGI Symbol;Acc:MGI:1931028]	protein_coding	ENSG00000160957	RECQL4	OK	11.4496	13.5519	0.2432	1.02983	0.20155	0.69761	no	12.5008	0.2432	0.2432	2	0	0	OK	0.904652	9.22243	3.34971	8.10413	5e-05	0.0019768	yes	5.06354	3.34971	3.34971	1	1	1
13631	ENSMUSG00000046179	ENSMUSG00000046179	E2f8	7:48866428-49610090	E2F transcription factor 8 [Source:MGI Symbol;Acc:MGI:1922038]	protein_coding	ENSG00000129173	E2F8	OK	57.7352	84.4747	0.549069	2.21016	0.00555	0.0870261	no	71.105	0.549069	0.549069	2	0	0	OK	2.17948	9.20965	2.07916	5.39337	5e-05	0.0019768	yes	5.69456	2.07916	2.07916	2	1	1
6234	ENSMUSG00000027641	ENSMUSG00000027641	Rbl1	2:157145892-157204534	RB transcriptional corepressor like 1 [Source:MGI Symbol;Acc:MGI:103300]	protein_coding	ENSG00000080839	RBL1	OK	18.7893	23.8591	0.344631	1.54447	0.0533	0.372624	no	21.3242	0.344631	0.344631	2	0	0	OK	4.24862	9.20642	1.11565	4.06795	5e-05	0.0019768	yes	6.72752	1.11565	1.11565	2	1	1
6474	ENSMUSG00000028068	ENSMUSG00000028068	Iqgap3	3:88081970-88121048	IQ motif containing GTPase activating protein 3 [Source:MGI Symbol;Acc:MGI:3028642]	protein_coding	ENSG00000183856	IQGAP3	OK	7.46605	9.11668	0.288164	1.21522	0.13755	0.599714	no	8.29137	0.288164	0.288164	2	0	0	OK	0.108552	9.17084	6.40059	4.87106	5e-05	0.0019768	yes	4.6397	6.40059	6.40059	1	1	1
3168	ENSMUSG00000021569	ENSMUSG00000021569	Trip13	13:73911346-73937784	thyroid hormone receptor interactor 13 [Source:MGI Symbol;Acc:MGI:1916966]	protein_coding	ENSG00000071539	TRIP13	OK	19.9474	27.8074	0.479266	1.43734	0.0828	0.477113	no	23.8774	0.479266	0.479266	2	0	0	OK	0.94517	9.15453	3.27584	6.37107	5e-05	0.0019768	yes	5.04985	3.27584	3.27584	1	1	1
1400	ENSMUSG00000012443	ENSMUSG00000012443	Kif11	19:37376402-37421859	kinesin family member 11 [Source:MGI Symbol;Acc:MGI:1098231]	protein_coding	ENSG00000138160	KIF11	OK	11.7795	17.2591	0.551083	2.75087	0.00145	0.0317447	yes	14.5193	0.551083	0.551083	2	0	0	OK	0.590168	9.12804	3.95111	11.6724	5e-05	0.0019768	yes	4.8591	3.95111	3.95111	1	1	1
16573	ENSMUSG00000058385	ENSMUSG00000058385	Hist1h2bg	13:23571395-23572013	histone cluster 1, H2bg [Source:MGI Symbol;Acc:MGI:2448386]	protein_coding	none	NA	OK	1.22329	0.59706	-1.03482	-1.42607	0.1075	0.544282	no	0.910175	-1.03482	1.03482	0	1	0	OK	23.7404	9.12138	-1.38002	-4.01581	0.0001	0.00364222	yes	16.4309	-1.38002	1.38002	2	1	1
9925	ENSMUSG00000035139	ENSMUSG00000035139	Secisbp2	13:51651696-51684044	SECIS binding protein 2 [Source:MGI Symbol;Acc:MGI:1922670]	protein_coding	ENSG00000187742	SECISBP2	OK	8.92912	7.99983	-0.158549	-0.450687	0.5957	0.971707	no	8.46448	-0.158549	0.158549	2	0	0	OK	16.932	9.07399	-0.899944	-2.90479	0.0006	0.016251	yes	13.003	-0.899944	0.899944	2	0	0
11740	ENSMUSG00000039994	ENSMUSG00000039994	Timeless	10:128225837-128252941	timeless circadian clock 1 [Source:MGI Symbol;Acc:MGI:1321393]	protein_coding	ENSG00000111602	TIMELESS	OK	30.5791	40.2926	0.39797	1.15255	0.1323	0.594902	no	35.4359	0.39797	0.39797	2	0	0	OK	0.977188	9.07144	3.21462	4.88816	5e-05	0.0019768	yes	5.02431	3.21462	3.21462	1	1	1
6564	ENSMUSG00000028228	ENSMUSG00000028228	Cpne3	4:19519253-19570108	copine III [Source:MGI Symbol;Acc:MGI:1917818]	protein_coding	ENSG00000085719	CPNE3	OK	7.95685	7.7503	-0.0379438	-0.176625	0.829	0.992781	no	7.85358	-0.0379438	0.0379438	2	0	0	OK	13.0444	8.96837	-0.540516	-2.61554	0.00165	0.0349961	yes	11.0064	-0.540516	0.540516	2	0	0
15002	ENSMUSG00000051220	ENSMUSG00000051220	Ercc6l	X:102141715-102157091	excision repair cross-complementing rodent repair deficiency complementation group 6 like [Source:MGI Symbol;Acc:MGI:2654144]	protein_coding	ENSG00000186871	ERCC6L	OK	7.76637	11.7199	0.593643	2.85806	0.0008	0.0204598	yes	9.74314	0.593643	0.593643	2	0	0	OK	2.35854	8.66898	1.87797	7.61105	5e-05	0.0019768	yes	5.51376	1.87797	1.87797	2	1	1
2643	ENSMUSG00000020649	ENSMUSG00000020649	Rrm2	12:24708240-24714146	ribonucleotide reductase M2 [Source:MGI Symbol;Acc:MGI:98181]	protein_coding	ENSG00000171848	RRM2	OK	130.767	172.657	0.400909	2.08631	0.01305	0.153771	no	151.712	0.400909	0.400909	2	0	0	OK	1.26912	8.59503	2.75967	7.23251	5e-05	0.0019768	yes	4.93207	2.75967	2.75967	1	1	1
12598	ENSMUSG00000042489	ENSMUSG00000042489	Clspn	4:126556934-126593903	claspin [Source:MGI Symbol;Acc:MGI:2445153]	protein_coding	ENSG00000092853	CLSPN	OK	24.2932	40.0552	0.721437	2.13631	0.00885	0.118655	no	32.1742	0.721437	0.721437	2	0	0	OK	0.373593	8.59499	4.52396	5.63033	5e-05	0.0019768	yes	4.48429	4.52396	4.52396	1	1	1
5940	ENSMUSG00000027160	ENSMUSG00000027160	Ccdc34	2:110017816-110173360	coiled-coil domain containing 34 [Source:MGI Symbol;Acc:MGI:1915451]	protein_coding	ENSG00000109881	CCDC34	OK	35.2027	28.2038	-0.319795	-1.38786	0.1038	0.535105	no	31.7033	-0.319795	0.319795	2	0	0	OK	3.00134	8.55825	1.51171	3.79003	0.0001	0.00364222	yes	5.7798	1.51171	1.51171	2	1	1
6127	ENSMUSG00000027454	ENSMUSG00000027454	Gins1	2:150905399-150931280	GINS complex subunit 1 (Psf1 homolog) [Source:MGI Symbol;Acc:MGI:1916520]	protein_coding	ENSG00000101003	GINS1	OK	35.5372	36.893	0.0540182	0.216809	0.8044	0.992781	no	36.2151	0.0540182	0.0540182	2	0	0	OK	1.00179	8.54075	3.09179	4.61699	5e-05	0.0019768	yes	4.77127	3.09179	3.09179	1	1	1
13961	ENSMUSG00000047356	ENSMUSG00000047356	Lcn10	2:25682725-25686081	lipocalin 10 [Source:MGI Symbol;Acc:MGI:1925000]	protein_coding	ENSG00000187922	LCN10	NOTEST	0	0	0	0	1	1	no	0	0	0	0	0	0	OK	2.43005	8.33252	1.77777	4.53313	5e-05	0.0019768	yes	5.38129	1.77777	1.77777	2	1	1
4981	ENSMUSG00000025323	ENSMUSG00000025323	Sp4	12:118234932-118301440	trans-acting transcription factor 4 [Source:MGI Symbol;Acc:MGI:107595]	protein_coding	ENSG00000105866	SP4	OK	4.0211	4.15492	0.0472299	0.135392	0.8341	0.992781	no	4.08801	0.0472299	0.0472299	2	0	0	OK	13.12	8.32426	-0.656372	-2.23989	0.0009	0.022329	yes	10.7221	-0.656372	0.656372	2	0	0
16179	ENSMUSG00000056531	ENSMUSG00000056531	Ccdc18	5:108132874-108233628	coiled-coil domain containing 18 [Source:MGI Symbol;Acc:MGI:1922974]	protein_coding	ENSG00000122483	CCDC18	OK	6.98949	8.6238	0.303138	0.773636	0.28595	0.797466	no	7.80664	0.303138	0.303138	2	0	0	OK	0.36244	8.30706	4.51852	6.11949	5e-05	0.0019768	yes	4.33475	4.51852	4.51852	1	1	1
8254	ENSMUSG00000031262	ENSMUSG00000031262	Cenpi	X:134308083-134362639	centromere protein I [Source:MGI Symbol;Acc:MGI:2147897]	protein_coding	ENSG00000102384	CENPI	OK	11.8985	16.1172	0.437822	1.71557	0.0437	0.336641	no	14.0079	0.437822	0.437822	2	0	0	OK	0.714504	8.20671	3.52179	4.01005	0.0001	0.00364222	yes	4.46061	3.52179	3.52179	1	1	1
10307	ENSMUSG00000036295	ENSMUSG00000036295	Lrrn3	12:41024089-42016756	leucine rich repeat protein 3, neuronal [Source:MGI Symbol;Acc:MGI:106036]	protein_coding	ENSG00000173114	LRRN3	OK	11.1979	14.9561	0.417514	1.86333	0.02855	0.259838	no	13.077	0.417514	0.417514	2	0	0	OK	12.5564	8.20101	-0.614553	-2.71402	0.0017	0.035841	yes	10.3787	-0.614553	0.614553	2	0	0
15438	ENSMUSG00000053128	ENSMUSG00000053128	Rnf26	9:44066326-44121960	ring finger protein 26 [Source:MGI Symbol;Acc:MGI:2388131]	protein_coding	NA	NA	OK	22.3478	18.4656	-0.275293	-1.27252	0.1291	0.588769	no	20.4067	-0.275293	0.275293	2	0	0	OK	4.0652	8.02846	0.981795	3.52973	5e-05	0.0019768	yes	6.04683	0.981795	0.981795	2	0	0
12263	ENSMUSG00000041498	ENSMUSG00000041498	Kif14	1:136466342-136531511	kinesin family member 14 [Source:MGI Symbol;Acc:MGI:1098226]	protein_coding	ENSG00000118193	KIF14	OK	6.97189	9.24974	0.407863	0.821391	0.18905	0.678142	no	8.11081	0.407863	0.407863	2	0	0	OK	0.141077	8.02186	5.82938	1.9745	5e-05	0.0019768	yes	4.08147	5.82938	5.82938	1	1	1
2950	ENSMUSG00000021177	ENSMUSG00000021177	Tdp1	12:99884516-99955219	tyrosyl-DNA phosphodiesterase 1 [Source:MGI Symbol;Acc:MGI:1920036]	protein_coding	ENSG00000042088	TDP1	OK	46.9487	39.2691	-0.257691	-0.905511	0.27145	0.781839	no	43.1089	-0.257691	0.257691	2	0	0	OK	2.66407	7.9615	1.57941	3.10618	0.00035	0.0105257	yes	5.31278	1.57941	1.57941	2	1	1
13294	ENSMUSG00000044968	ENSMUSG00000044968	Napepld	5:21662900-21701396	N-acyl phosphatidylethanolamine phospholipase D [Source:MGI Symbol;Acc:MGI:2140885]	protein_coding	ENSG00000161048	NAPEPLD	OK	5.61626	7.08915	0.336003	1.40518	0.09645	0.515344	no	6.35271	0.336003	0.336003	2	0	0	OK	4.22732	7.96108	0.913222	3.67016	5e-05	0.0019768	yes	6.0942	0.913222	0.913222	2	0	0
9640	ENSMUSG00000034329	ENSMUSG00000034329	Brip1	11:86058137-86201193	BRCA1 interacting protein C-terminal helicase 1 [Source:MGI Symbol;Acc:MGI:2442836]	protein_coding	ENSG00000136492	BRIP1	OK	8.21429	11.1288	0.438086	0.807918	0.33885	0.846195	no	9.67155	0.438086	0.438086	2	0	0	OK	1.68633	7.95132	2.23731	3.01532	0.0008	0.0204598	yes	4.81883	2.23731	2.23731	1	1	1
4209	ENSMUSG00000023959	ENSMUSG00000023959	Clic5	17:44188583-44280172	chloride intracellular channel 5 [Source:MGI Symbol;Acc:MGI:1917912]	protein_coding	ENSG00000112782	CLIC5	OK	1.23195	0.578813	-1.08978	-2.91401	0.00165	0.0349961	yes	0.905382	-1.08978	1.08978	0	1	0	OK	16.0203	7.91331	-1.01755	-4.98709	5e-05	0.0019768	yes	11.9668	-1.01755	1.01755	2	1	1
22439	ENSMUSG00000078521	ENSMUSG00000078521	Aunip	4:134510998-134523927	aurora kinase A and ninein interacting protein [Source:MGI Symbol;Acc:MGI:1917135]	protein_coding	ENSG00000127423	AUNIP	OK	17.9728	21.7068	0.272331	1.12389	0.1913	0.682136	no	19.8398	0.272331	0.272331	2	0	0	OK	0.248079	7.91277	4.99531	8.28166	0.0003	0.00925391	yes	4.08042	4.99531	4.99531	1	1	1
13741	ENSMUSG00000046591	ENSMUSG00000046591	Ticrr	7:79660195-79715720	TOPBP1-interacting checkpoint and replication regulator [Source:MGI Symbol;Acc:MGI:1924261]	protein_coding	ENSG00000140534	TICRR	OK	11.1472	13.5967	0.286576	0.85883	0.18205	0.667115	no	12.372	0.286576	0.286576	2	0	0	OK	0.351384	7.80306	4.47292	5.84683	5e-05	0.0019768	yes	4.07722	4.47292	4.47292	1	1	1
8292	ENSMUSG00000031337	ENSMUSG00000031337	Mtm1	X:71210766-71315691	X-linked myotubular myopathy gene 1 [Source:MGI Symbol;Acc:MGI:1099452]	protein_coding	ENSG00000171100	MTM1	OK	4.08491	4.25769	0.0597646	0.217289	0.79545	0.992781	no	4.1713	0.0597646	0.0597646	2	0	0	OK	12.0459	7.77795	-0.631081	-2.76606	0.00185	0.0383021	yes	9.91193	-0.631081	0.631081	2	0	0
11363	ENSMUSG00000039005	ENSMUSG00000039005	Tlr4	4:66827583-66930284	toll-like receptor 4 [Source:MGI Symbol;Acc:MGI:96824]	protein_coding	ENSG00000136869	TLR4	OK	9.79372	9.05502	-0.113139	-0.398895	0.57515	0.966762	no	9.42437	-0.113139	0.113139	2	0	0	OK	13.5648	7.74595	-0.808352	-3.18964	5e-05	0.0019768	yes	10.6554	-0.808352	0.808352	2	0	0
13070	ENSMUSG00000044201	ENSMUSG00000044201	Cdc25c	18:34732992-34751533	cell division cycle 25C [Source:MGI Symbol;Acc:MGI:88350]	protein_coding	ENSG00000158402	CDC25C	OK	29.4979	24.2266	-0.284019	-1.19917	0.1505	0.61262	no	26.8623	-0.284019	0.284019	2	0	0	OK	0.305232	7.6859	4.65424	5.56903	5e-05	0.0019768	yes	3.99557	4.65424	4.65424	1	1	1
12043	ENSMUSG00000040749	ENSMUSG00000040749	Siah1b	X:164070704-164076493	siah E3 ubiquitin protein ligase 1B [Source:MGI Symbol;Acc:MGI:108063]	protein_coding	NA	NA	OK	7.42736	10.5611	0.507836	1.74514	0.04055	0.324136	no	8.99423	0.507836	0.507836	2	0	0	OK	2.18103	7.63938	1.80844	4.59105	5e-05	0.0019768	yes	4.9102	1.80844	1.80844	2	1	1
22542	ENSMUSG00000078773	ENSMUSG00000078773	Rad54b	4:11558921-11615805	RAD54 homolog B (S. cerevisiae) [Source:MGI Symbol;Acc:MGI:3605986]	protein_coding	NA	NA	OK	16.129	16.2521	0.0109752	0.0331598	0.96925	0.99505	no	16.1906	0.0109752	0.0109752	2	0	0	OK	1.06419	7.6321	2.84233	4.96331	5e-05	0.0019768	yes	4.34815	2.84233	2.84233	1	1	1
9592	ENSMUSG00000034206	ENSMUSG00000034206	Polq	16:37011785-37095417	polymerase (DNA directed), theta [Source:MGI Symbol;Acc:MGI:2155399]	protein_coding	ENSG00000051341	POLQ	OK	10.0275	11.4573	0.192303	0.738778	0.38425	0.881495	no	10.7424	0.192303	0.192303	2	0	0	OK	0.437987	7.61364	4.11963	7.85246	5e-05	0.0019768	yes	4.02581	4.11963	4.11963	1	1	1
3241	ENSMUSG00000021697	ENSMUSG00000021697	Depdc1b	13:108316331-108407782	DEP domain containing 1B [Source:MGI Symbol;Acc:MGI:2145425]	protein_coding	ENSG00000035499	DEPDC1B	OK	12.9095	13.6207	0.0773631	0.34349	0.67955	0.983057	no	13.2651	0.0773631	0.0773631	2	0	0	OK	0.147985	7.5463	5.67225	4.25646	5e-05	0.0019768	yes	3.84714	5.67225	5.67225	1	1	1
9739	ENSMUSG00000034612	ENSMUSG00000034612	Chst11	10:82985497-83195900	carbohydrate sulfotransferase 11 [Source:MGI Symbol;Acc:MGI:1927166]	protein_coding	ENSG00000171310	CHST11	OK	5.87873	3.75023	-0.648525	-2.71492	0.0015	0.0325488	yes	4.81448	-0.648525	0.648525	2	0	0	OK	11.2818	7.36945	-0.614365	-2.92749	0.00065	0.017298	yes	9.32563	-0.614365	0.614365	2	0	0
11420	ENSMUSG00000039145	ENSMUSG00000039145	Camk1d	2:5293456-5714515	calcium/calmodulin-dependent protein kinase ID [Source:MGI Symbol;Acc:MGI:2442190]	protein_coding	ENSG00000183049	CAMK1D	OK	3.78164	4.11792	0.122902	0.312177	0.5818	0.968288	no	3.94978	0.122902	0.122902	2	0	0	OK	10.5868	7.30825	-0.53467	-2.53699	0.0026	0.0494895	yes	8.94753	-0.53467	0.53467	2	0	0
8447	ENSMUSG00000031583	ENSMUSG00000031583	Wrn	8:33234383-33385527	Werner syndrome RecQ like helicase [Source:MGI Symbol;Acc:MGI:109635]	protein_coding	ENSG00000165392	WRN	OK	7.2343	7.51037	0.0540301	0.254584	0.76955	0.99264	no	7.37233	0.0540301	0.0540301	2	0	0	OK	10.3777	7.03238	-0.561409	-2.68306	0.0022	0.0437041	yes	8.70504	-0.561409	0.561409	2	0	0
3792	ENSMUSG00000022610	ENSMUSG00000022610	Mapk12	15:89130583-89140703	mitogen-activated protein kinase 12 [Source:MGI Symbol;Acc:MGI:1353438]	protein_coding	ENSG00000188130	MAPK12	OK	4.91211	3.35845	-0.548549	-0.575765	0.28065	0.791804	no	4.13528	-0.548549	0.548549	2	0	0	OK	3.28261	7.01498	1.09559	2.78234	0.00145	0.0317447	yes	5.14879	1.09559	1.09559	2	1	1
3836	ENSMUSG00000022686	ENSMUSG00000022686	B3gnt5	16:19760207-19772753	UDP-GlcNAc:betaGal beta-1,3-N-acetylglucosaminyltransferase 5 [Source:MGI Symbol;Acc:MGI:2137302]	protein_coding	ENSG00000176597	B3GNT5	OK	17.6683	14.2889	-0.306268	-1.47645	0.0811	0.471507	no	15.9786	-0.306268	0.306268	2	0	0	OK	2.97604	6.8796	1.20893	4.17381	5e-05	0.0019768	yes	4.92782	1.20893	1.20893	2	1	1
4583	ENSMUSG00000024601	ENSMUSG00000024601	Isoc1	18:58659465-58680368	isochorismatase domain containing 1 [Source:MGI Symbol;Acc:MGI:1913557]	protein_coding	ENSG00000066583	ISOC1	OK	21.824	23.4447	0.103347	0.521018	0.53335	0.953953	no	22.6344	0.103347	0.103347	2	0	0	OK	11.3262	6.85449	-0.724545	-3.16059	0.0001	0.00364222	yes	9.09034	-0.724545	0.724545	2	0	0
3630	ENSMUSG00000022360	ENSMUSG00000022360	Atad2	15:58094043-58135082	ATPase family, AAA domain containing 2 [Source:MGI Symbol;Acc:MGI:1917722]	protein_coding	none	NA	OK	5.9842	9.80203	0.711921	3.06498	5e-05	0.0019768	yes	7.89311	0.711921	0.711921	2	0	0	OK	3.27152	6.80062	1.05571	4.0308	5e-05	0.0019768	yes	5.03607	1.05571	1.05571	2	1	1
7742	ENSMUSG00000030268	ENSMUSG00000030268	Bcat1	6:144993834-145076184	branched chain aminotransferase 1, cytosolic [Source:MGI Symbol;Acc:MGI:104861]	protein_coding	ENSG00000060982	BCAT1	OK	65.8893	76.4996	0.215408	0.887786	0.23155	0.736226	no	71.1945	0.215408	0.215408	2	0	0	OK	2.85128	6.75086	1.24346	2.93214	0.00025	0.00795068	yes	4.80107	1.24346	1.24346	2	1	1
2173	ENSMUSG00000019845	ENSMUSG00000019845	Tube1	10:39133975-39163794	epsilon-tubulin 1 [Source:MGI Symbol;Acc:MGI:1919174]	protein_coding	ENSG00000074935	TUBE1	OK	13.7291	10.3085	-0.413404	-1.31757	0.12035	0.572022	no	12.0188	-0.413404	0.413404	2	0	0	OK	1.72344	6.70396	1.95972	5.46922	5e-05	0.0019768	yes	4.2137	1.95972	1.95972	1	1	1
9499	ENSMUSG00000033952	ENSMUSG00000033952	Aspm	1:139454771-139494091	abnormal spindle microtubule assembly [Source:MGI Symbol;Acc:MGI:1334448]	protein_coding	ENSG00000066279	ASPM	OK	26.3833	17.5392	-0.589046	-0.752794	0.35215	0.857508	no	21.9612	-0.589046	0.589046	2	0	0	OK	0.509339	6.63974	3.70443	4.13801	5e-05	0.0019768	yes	3.57454	3.70443	3.70443	1	1	1
6062	ENSMUSG00000027353	ENSMUSG00000027353	Mcm8	2:132816140-132844197	minichromosome maintenance 8 homologous recombination repair factor [Source:MGI Symbol;Acc:MGI:1913884]	protein_coding	NA	NA	OK	7.90596	8.92148	0.174342	0.737501	0.38015	0.878232	no	8.41372	0.174342	0.174342	2	0	0	OK	0.893159	6.63208	2.89247	7.72549	5e-05	0.0019768	yes	3.76262	2.89247	2.89247	1	1	1
12647	ENSMUSG00000042622	ENSMUSG00000042622	Maff	15:79346620-79359076	v-maf musculoaponeurotic fibrosarcoma oncogene family, protein F (avian) [Source:MGI Symbol;Acc:MGI:96910]	protein_coding	ENSG00000185022	MAFF	OK	5.82581	1.67752	-1.79613	-4.62905	5e-05	0.0019768	yes	3.75167	-1.79613	1.79613	1	1	1	OK	3.29409	6.41129	0.960736	2.97089	0.00095	0.0233132	yes	4.85269	0.960736	0.960736	2	0	0
3668	ENSMUSG00000022422	ENSMUSG00000022422	Dscc1	15:55076098-55097699	DNA replication and sister chromatid cohesion 1 [Source:MGI Symbol;Acc:MGI:1919357]	protein_coding	ENSG00000136982	DSCC1	OK	9.97586	11.6375	0.222264	0.795469	0.3482	0.854008	no	10.8067	0.222264	0.222264	2	0	0	OK	0.616063	6.30997	3.35648	7.38706	5e-05	0.0019768	yes	3.46302	3.35648	3.35648	1	1	1
9860	ENSMUSG00000034918	ENSMUSG00000034918	Cdhr2	13:54701460-54736662	cadherin-related family member 2 [Source:MGI Symbol;Acc:MGI:2687323]	protein_coding	ENSG00000074276	CDHR2	OK	8.98523	13.897	0.629141	2.98264	0.00075	0.0193743	yes	11.4411	0.629141	0.629141	2	0	0	OK	3.63881	6.20096	0.769022	3.03018	0.00085	0.0213895	yes	4.91988	0.769022	0.769022	2	0	0
11832	ENSMUSG00000040253	ENSMUSG00000040253	Gbp7	3:142530341-142550149	guanylate binding protein 7 [Source:MGI Symbol;Acc:MGI:2444421]	protein_coding	NA	NA	OK	37.6383	38.6708	0.0390416	0.204009	0.8097	0.992781	no	38.1546	0.0390416	0.0390416	2	0	0	OK	12.3301	6.04487	-1.02841	-4.64569	5e-05	0.0019768	yes	9.18749	-1.02841	1.02841	2	1	1
800	ENSMUSG00000005087	ENSMUSG00000005087	Cd44	2:102811140-102901665	CD44 antigen [Source:MGI Symbol;Acc:MGI:88338]	protein_coding	ENSG00000026508	CD44	OK	6.26607	4.69881	-0.415263	-1.53963	0.0664	0.424686	no	5.48244	-0.415263	0.415263	2	0	0	OK	9.27323	5.86295	-0.661444	-2.83847	0.00125	0.0282769	yes	7.56809	-0.661444	0.661444	2	0	0
14040	ENSMUSG00000047642	ENSMUSG00000047642	D930020B18Rik	10:121641587-121693915	RIKEN cDNA D930020B18 gene [Source:MGI Symbol;Acc:MGI:2442001]	protein_coding	ENSG00000185306	C12orf56	NOTEST	0	0.0138452	inf	0	1	1	no	0.0069226	10	10	0	1	0	OK	3.06843	5.76821	0.910625	3.27233	5e-05	0.0019768	yes	4.41832	0.910625	0.910625	2	0	0
16832	ENSMUSG00000059495	ENSMUSG00000059495	Arhgef12	9:42963841-43107239	Rho guanine nucleotide exchange factor (GEF) 12 [Source:MGI Symbol;Acc:MGI:1916882]	protein_coding	ENSG00000196914	ARHGEF12	OK	2.58332	2.83061	0.13189	0.373714	0.58415	0.969055	no	2.70697	0.13189	0.13189	2	0	0	OK	9.12452	5.68973	-0.681388	-2.89341	0.0001	0.00364222	yes	7.40713	-0.681388	0.681388	2	0	0
9523	ENSMUSG00000034023	ENSMUSG00000034023	Fancd2	6:113531681-113600715	Fanconi anemia, complementation group D2 [Source:MGI Symbol;Acc:MGI:2448480]	protein_coding	ENSG00000144554	FANCD2	OK	11.8607	14.61	0.300761	0.844245	0.24485	0.752271	no	13.2354	0.300761	0.300761	2	0	0	OK	0.574117	5.65871	3.30106	3.98959	5e-05	0.0019768	yes	3.11641	3.30106	3.30106	1	1	1
6886	ENSMUSG00000028766	ENSMUSG00000028766	Alpl	4:137741732-137796384	alkaline phosphatase, liver/bone/kidney [Source:MGI Symbol;Acc:MGI:87983]	protein_coding	ENSG00000162551	ALPL	OK	67.2019	93.0966	0.470226	2.45695	0.0029	0.0537491	no	80.1492	0.470226	0.470226	2	0	0	OK	10.2365	5.61809	-0.865566	-2.74398	0.00165	0.0349961	yes	7.92729	-0.865566	0.865566	2	0	0
4680	ENSMUSG00000024790	ENSMUSG00000024790	Sac3d1	19:6115999-6118650	SAC3 domain containing 1 [Source:MGI Symbol;Acc:MGI:1913656]	protein_coding	ENSG00000168061	SAC3D1	OK	12.9047	12.8433	-0.00688349	-0.0264998	0.9763	0.995717	no	12.874	-0.00688349	0.00688349	2	0	0	OK	2.41445	5.60139	1.21409	3.27658	0.0007	0.0183858	yes	4.00792	1.21409	1.21409	2	1	1
5411	ENSMUSG00000026196	ENSMUSG00000026196	Bard1	1:71027497-71103146	BRCA1 associated RING domain 1 [Source:MGI Symbol;Acc:MGI:1328361]	protein_coding	ENSG00000138376	BARD1	OK	6.32942	6.93919	0.132694	0.610281	0.47835	0.933728	no	6.6343	0.132694	0.132694	2	0	0	OK	0.365336	5.5985	3.93775	10.8454	5e-05	0.0019768	yes	2.98192	3.93775	3.93775	1	1	1
6943	ENSMUSG00000028860	ENSMUSG00000028860	Sytl1	4:133253089-133263113	synaptotagmin-like 1 [Source:MGI Symbol;Acc:MGI:1933365]	protein_coding	ENSG00000142765	SYTL1	OK	6.68049	4.24621	-0.653779	-2.08481	0.0134	0.156328	no	5.46335	-0.653779	0.653779	2	0	0	OK	9.70046	5.58636	-0.796144	-2.82945	0.0012	0.0273763	yes	7.64341	-0.796144	0.796144	2	0	0
5180	ENSMUSG00000025764	ENSMUSG00000025764	Jade1	3:41555730-41616864	jade family PHD finger 1 [Source:MGI Symbol;Acc:MGI:1925835]	protein_coding	ENSG00000077684	JADE1	OK	10.3643	12.4345	0.262726	0.932323	0.16895	0.645831	no	11.3994	0.262726	0.262726	2	0	0	OK	2.96964	5.55728	0.904089	2.73696	5e-05	0.0019768	yes	4.26346	0.904089	0.904089	2	0	0
11688	ENSMUSG00000039842	ENSMUSG00000039842	Mcph1	8:18595130-18803189	microcephaly, primary autosomal recessive 1 [Source:MGI Symbol;Acc:MGI:2443308]	protein_coding	ENSG00000147316	MCPH1	OK	6.08301	9.97546	0.713598	2.83528	0.0004	0.0117599	yes	8.02923	0.713598	0.713598	2	0	0	OK	2.00179	5.46972	1.45017	3.76263	5e-05	0.0019768	yes	3.73576	1.45017	1.45017	2	1	1
7286	ENSMUSG00000029414	ENSMUSG00000029414	Kntc1	5:123749715-123821593	kinetochore associated 1 [Source:MGI Symbol;Acc:MGI:2673709]	protein_coding	ENSG00000184445	KNTC1	OK	14.4384	19.3958	0.425836	0.973354	0.23645	0.742169	no	16.9171	0.425836	0.425836	2	0	0	OK	0.660385	5.44414	3.04333	3.56848	0.00015	0.00513825	yes	3.05226	3.04333	3.04333	1	1	1
8322	ENSMUSG00000031381	ENSMUSG00000031381	Piga	X:164419786-164433916	phosphatidylinositol glycan anchor biosynthesis, class A [Source:MGI Symbol;Acc:MGI:99461]	protein_coding	ENSG00000165195	PIGA	OK	8.96585	6.73762	-0.412201	-1.73972	0.03695	0.306656	no	7.85173	-0.412201	0.412201	2	0	0	OK	3.04387	5.41869	0.832035	2.90973	0.00045	0.0129202	yes	4.23128	0.832035	0.832035	2	0	0
9511	ENSMUSG00000033981	ENSMUSG00000033981	Gria2	3:80681449-80802835	glutamate receptor, ionotropic, AMPA2 (alpha 2) [Source:MGI Symbol;Acc:MGI:95809]	protein_coding	ENSG00000120251	GRIA2	OK	17.7378	18.985	0.0980358	0.46672	0.5826	0.968648	no	18.3614	0.0980358	0.0980358	2	0	0	OK	9.70247	5.31675	-0.867807	-3.62836	5e-05	0.0019768	yes	7.50961	-0.867807	0.867807	2	0	0
5746	ENSMUSG00000026779	ENSMUSG00000026779	Mastl	2:23115605-23156024	microtubule associated serine/threonine kinase-like [Source:MGI Symbol;Acc:MGI:1914371]	protein_coding	ENSG00000120539	MASTL	OK	5.15933	5.58003	0.113089	0.354592	0.6723	0.982027	no	5.36968	0.113089	0.113089	2	0	0	OK	0.200883	5.27076	4.71358	9.34584	5e-05	0.0019768	yes	2.73582	4.71358	4.71358	1	1	1
3442	ENSMUSG00000022033	ENSMUSG00000022033	Pbk	14:65805836-65817822	PDZ binding kinase [Source:MGI Symbol;Acc:MGI:1289156]	protein_coding	ENSG00000168078	PBK	OK	73.0449	66.4439	-0.136647	-0.54742	0.5091	0.94556	no	69.7444	-0.136647	0.136647	2	0	0	OK	1.32665	5.26809	1.98949	3.27871	0.00015	0.00513825	yes	3.29737	1.98949	1.98949	1	1	1
21021	ENSMUSG00000074994	ENSMUSG00000074994	Qser1	2:104754794-104816760	glutamine and serine rich 1 [Source:MGI Symbol;Acc:MGI:2138986]	protein_coding	ENSG00000060749	QSER1	OK	6.115	6.26715	0.0354555	0.1736	0.83855	0.992781	no	6.19107	0.0354555	0.0354555	2	0	0	OK	7.74231	5.25839	-0.558141	-2.73191	0.00175	0.0366759	yes	6.50035	-0.558141	0.558141	2	0	0
7382	ENSMUSG00000029570	ENSMUSG00000029570	Lfng	5:140607319-140615545	LFNG O-fucosylpeptide 3-beta-N-acetylglucosaminyltransferase [Source:MGI Symbol;Acc:MGI:1095413]	protein_coding	ENSG00000106003	LFNG	OK	63.0243	64.2534	0.0278644	0.112435	0.89455	0.992805	no	63.6388	0.0278644	0.0278644	2	0	0	OK	12.5835	5.15759	-1.28676	-3.93735	5e-05	0.0019768	yes	8.87054	-1.28676	1.28676	2	1	1
6743	ENSMUSG00000028542	ENSMUSG00000028542	Slc6a9	4:117834505-117883487	solute carrier family 6 (neurotransmitter transporter, glycine), member 9 [Source:MGI Symbol;Acc:MGI:95760]	protein_coding	ENSG00000196517	SLC6A9	OK	9.51896	4.41672	-1.10783	-3.3655	5e-05	0.0019768	yes	6.96784	-1.10783	1.10783	2	1	1	OK	2.00763	5.14542	1.3578	2.52771	0.00085	0.0213895	yes	3.57652	1.3578	1.3578	2	1	1
7280	ENSMUSG00000029406	ENSMUSG00000029406	Pitpnm2	5:124118689-124249760	phosphatidylinositol transfer protein, membrane-associated 2 [Source:MGI Symbol;Acc:MGI:1336192]	protein_coding	ENSG00000090975	PITPNM2	OK	10.7242	13.495	0.331557	1.10279	0.11135	0.553298	no	12.1096	0.331557	0.331557	2	0	0	OK	11.562	5.11354	-1.177	-4.38108	5e-05	0.0019768	yes	8.33777	-1.177	1.177	2	1	1
3921	ENSMUSG00000022833	ENSMUSG00000022833	Ccdc14	16:34690615-34725202	coiled-coil domain containing 14 [Source:MGI Symbol;Acc:MGI:2443448]	protein_coding	ENSG00000175455	CCDC14	OK	6.15441	6.0962	-0.0137085	-0.0575772	0.94615	0.994117	no	6.1253	-0.0137085	0.0137085	2	0	0	OK	2.46897	5.06755	1.03738	3.80316	0.0001	0.00364222	yes	3.76826	1.03738	1.03738	2	1	1
10009	ENSMUSG00000035365	ENSMUSG00000035365	Parpbp	10:88091071-88146941	PARP1 binding protein [Source:MGI Symbol;Acc:MGI:1922567]	protein_coding	ENSG00000185480	PARPBP	OK	13.5031	10.464	-0.367859	-1.25556	0.1202	0.572022	no	11.9836	-0.367859	0.367859	2	0	0	OK	1.22932	4.95388	2.0107	3.11893	0.00235	0.0459717	yes	3.0916	2.0107	2.0107	1	1	1
14880	ENSMUSG00000050786	ENSMUSG00000050786	Ccdc126	6:49319273-49341582	coiled-coil domain containing 126 [Source:MGI Symbol;Acc:MGI:1889376]	protein_coding	ENSG00000169193	CCDC126	OK	2.15984	2.15283	-0.0046909	-0.0128061	0.9923	0.998102	no	2.15633	-0.0046909	0.0046909	2	0	0	OK	9.96258	4.94597	-1.01027	-3.79655	5e-05	0.0019768	yes	7.45428	-1.01027	1.01027	2	1	1
9351	ENSMUSG00000033454	ENSMUSG00000033454	Zbtb1	12:76370265-76396950	zinc finger and BTB domain containing 1 [Source:MGI Symbol;Acc:MGI:2442326]	protein_coding	ENSG00000126804	ZBTB1	OK	4.58433	5.53929	0.27299	1.35294	0.1104	0.551004	no	5.06181	0.27299	0.27299	2	0	0	OK	7.69285	4.8997	-0.650825	-3.28453	5e-05	0.0019768	yes	6.29627	-0.650825	0.650825	2	0	0
10384	ENSMUSG00000036555	ENSMUSG00000036555	Iqce	5:140661826-140702378	IQ motif containing E [Source:MGI Symbol;Acc:MGI:1921489]	protein_coding	none	NA	OK	9.72435	10.7334	0.142433	0.396009	0.60735	0.973311	no	10.2289	0.142433	0.142433	2	0	0	OK	11.6733	4.89138	-1.2549	-2.94239	0.0002	0.00660246	yes	8.28234	-1.2549	1.2549	2	1	1
31299	ENSMUSG00000090877	ENSMUSG00000090877	Hspa1b	17:34956435-34959238	heat shock protein 1B [Source:MGI Symbol;Acc:MGI:99517]	protein_coding	NA	NA	OK	0.779667	1.14464	0.553958	1.26662	0.1403	0.600838	no	0.962154	0.553958	0.553958	0	0	0	OK	2.5048	4.85102	0.953592	3.091	0.0005	0.0140204	yes	3.67791	0.953592	0.953592	2	0	0
11665	ENSMUSG00000039782	ENSMUSG00000039782	Cpeb2	5:43151685-43289724	cytoplasmic polyadenylation element binding protein 2 [Source:MGI Symbol;Acc:MGI:2442640]	protein_coding	ENSG00000137449	CPEB2	OK	1.20477	1.38675	0.202956	0.390215	0.5769	0.967324	no	1.29576	0.202956	0.202956	0	0	0	OK	9.45492	4.80117	-0.97768	-3.86851	5e-05	0.0019768	yes	7.12805	-0.97768	0.97768	2	0	0
13861	ENSMUSG00000046994	ENSMUSG00000046994	Mars2	1:55237176-55248470	methionine-tRNA synthetase 2 (mitochondrial) [Source:MGI Symbol;Acc:MGI:2444136]	protein_coding	ENSG00000247626	MARS2	OK	3.1169	3.02352	-0.0438807	-0.200341	0.81655	0.992781	no	3.07021	-0.0438807	0.0438807	2	0	0	OK	2.61172	4.78762	0.874309	4.05692	5e-05	0.0019768	yes	3.69967	0.874309	0.874309	2	0	0
1815	ENSMUSG00000017550	ENSMUSG00000017550	Atad5	11:80089399-80135794	ATPase family, AAA domain containing 5 [Source:MGI Symbol;Acc:MGI:2442925]	protein_coding	ENSG00000176208	ATAD5	OK	10.5612	14.6226	0.469432	1.86803	0.01205	0.145451	no	12.5919	0.469432	0.469432	2	0	0	OK	1.3218	4.77481	1.85294	5.46728	5e-05	0.0019768	yes	3.04831	1.85294	1.85294	1	1	1
2809	ENSMUSG00000020901	ENSMUSG00000020901	Pik3r5	11:68432120-68497849	phosphoinositide-3-kinase regulatory subunit 5 [Source:MGI Symbol;Acc:MGI:2443588]	protein_coding	ENSG00000141506	PIK3R5	OK	5.87871	6.37565	0.117072	0.432389	0.59195	0.971107	no	6.12718	0.117072	0.117072	2	0	0	OK	7.59112	4.77216	-0.669672	-2.56162	0.002	0.0405447	yes	6.18164	-0.669672	0.669672	2	0	0
8295	ENSMUSG00000031343	ENSMUSG00000031343	Gabra3	X:72432680-72656848	gamma-aminobutyric acid (GABA) A receptor, subunit alpha 3 [Source:MGI Symbol;Acc:MGI:95615]	protein_coding	ENSG00000011677	GABRA3	OK	5.44302	5.38468	-0.0155489	-0.0618089	0.9442	0.994117	no	5.41385	-0.0155489	0.0155489	2	0	0	OK	7.76096	4.74686	-0.70926	-2.87356	0.00055	0.0151958	yes	6.25391	-0.70926	0.70926	2	0	0
19839	ENSMUSG00000070639	ENSMUSG00000070639	Lrrc8b	5:105415774-105490074	leucine rich repeat containing 8 family, member B [Source:MGI Symbol;Acc:MGI:2141353]	protein_coding	ENSG00000197147	LRRC8B	OK	2.47967	1.43575	-0.788345	-2.82012	0.0012	0.0273763	yes	1.95771	-0.788345	0.788345	1	0	0	OK	8.81055	4.72224	-0.899761	-4.2154	5e-05	0.0019768	yes	6.76639	-0.899761	0.899761	2	0	0
6985	ENSMUSG00000028933	ENSMUSG00000028933	Xrcc2	5:25689811-25705825	X-ray repair complementing defective repair in Chinese hamster cells 2 [Source:MGI Symbol;Acc:MGI:1927345]	protein_coding	ENSG00000196584	XRCC2	OK	7.33776	11.3114	0.624368	2.55215	0.002	0.0405447	yes	9.32458	0.624368	0.624368	2	0	0	OK	1.20024	4.66798	1.95948	5.05766	5e-05	0.0019768	yes	2.93411	1.95948	1.95948	1	1	1
5745	ENSMUSG00000026778	ENSMUSG00000026778	Prkcq	2:11172107-11301222	protein kinase C, theta [Source:MGI Symbol;Acc:MGI:97601]	protein_coding	ENSG00000065675	PRKCQ	OK	4.63122	2.76136	-0.746013	-2.35063	0.0082	0.113808	no	3.69629	-0.746013	0.746013	2	0	0	OK	8.47695	4.64535	-0.867758	-3.20583	0.0004	0.0117599	yes	6.56115	-0.867758	0.867758	2	0	0
10236	ENSMUSG00000036086	ENSMUSG00000036086	Zranb3	1:127954183-128103047	zinc finger, RAN-binding domain containing 3 [Source:MGI Symbol;Acc:MGI:1918362]	protein_coding	ENSG00000121988	ZRANB3	OK	6.8672	6.21528	-0.143901	-0.392683	0.6233	0.974214	no	6.54124	-0.143901	0.143901	2	0	0	OK	1.39553	4.6316	1.73069	3.26461	5e-05	0.0019768	yes	3.01356	1.73069	1.73069	1	1	1
6242	ENSMUSG00000027654	ENSMUSG00000027654	Fam83d	2:158768092-158786637	family with sequence similarity 83, member D [Source:MGI Symbol;Acc:MGI:1919128]	protein_coding	ENSG00000101447	FAM83D	OK	15.3411	11.6777	-0.393646	-1.73646	0.04245	0.331114	no	13.5094	-0.393646	0.393646	2	0	0	OK	0.853441	4.62509	2.43812	6.17527	5e-05	0.0019768	yes	2.73927	2.43812	2.43812	1	1	1
10920	ENSMUSG00000037991	ENSMUSG00000037991	Rmi2	16:10835058-10938364	RecQ mediated genome instability 2 [Source:MGI Symbol;Acc:MGI:2685383]	protein_coding	ENSG00000175643	RMI2	OK	11.7303	10.2586	-0.193407	-0.896194	0.2934	0.804561	no	10.9945	-0.193407	0.193407	2	0	0	OK	1.37278	4.59984	1.74449	4.98977	5e-05	0.0019768	yes	2.98631	1.74449	1.74449	1	1	1
15893	ENSMUSG00000055184	ENSMUSG00000055184	Fam72a	1:131527902-131539872	family with sequence similarity 72, member A [Source:MGI Symbol;Acc:MGI:1919669]	protein_coding	NA	NA	OK	6.76591	10.2442	0.598458	2.31898	0.0095	0.124586	no	8.50505	0.598458	0.598458	2	0	0	OK	1.20351	4.50573	1.90451	5.06234	5e-05	0.0019768	yes	2.85462	1.90451	1.90451	1	1	1
3195	ENSMUSG00000021611	ENSMUSG00000021611	Tert	13:73626910-73649843	telomerase reverse transcriptase [Source:MGI Symbol;Acc:MGI:1202709]	protein_coding	ENSG00000164362	TERT	NOTEST	0.112585	0.00496173	-4.50403	0	1	1	no	0.0587734	-4.50403	4.50403	0	1	0	OK	20.7919	4.29437	-2.2755	-4.655	5e-05	0.0019768	yes	12.5431	-2.2755	2.2755	2	1	1
8514	ENSMUSG00000031700	ENSMUSG00000031700	Gpt2	8:85492575-85527560	glutamic pyruvate transaminase (alanine aminotransferase) 2 [Source:MGI Symbol;Acc:MGI:1915391]	protein_coding	ENSG00000166123	GPT2	OK	18.062	10.807	-0.740985	-2.32521	0.00785	0.110142	no	14.4345	-0.740985	0.740985	2	0	0	OK	0.931922	4.18124	2.16565	4.05377	5e-05	0.0019768	yes	2.55658	2.16565	2.16565	1	1	1
10217	ENSMUSG00000036022	ENSMUSG00000036022	Fam122b	X:53243414-53269805	family with sequence similarity 122, member B [Source:MGI Symbol;Acc:MGI:1926005]	protein_coding	ENSG00000156504	FAM122B	OK	6.96418	7.32429	0.0727359	0.302884	0.7311	0.990729	no	7.14424	0.0727359	0.0727359	2	0	0	OK	1.88045	3.95675	1.07324	3.47625	0.0001	0.00364222	yes	2.9186	1.07324	1.07324	1	1	1
1719	ENSMUSG00000016477	ENSMUSG00000016477	E2f3	13:29906574-29986063	E2F transcription factor 3 [Source:MGI Symbol;Acc:MGI:1096340]	protein_coding	ENSG00000112242	E2F3	OK	4.88939	6.84937	0.486318	1.99816	0.01595	0.176514	no	5.86938	0.486318	0.486318	2	0	0	OK	2.21684	3.95392	0.834783	2.66457	0.0015	0.0325488	yes	3.08538	0.834783	0.834783	2	0	0
20164	ENSMUSG00000072082	ENSMUSG00000072082	Ccnf	17:24222197-24251484	cyclin F [Source:MGI Symbol;Acc:MGI:102551]	protein_coding	ENSG00000162063	CCNF	OK	35.2853	20.7092	-0.768792	-2.52291	0.00125	0.0282769	yes	27.9973	-0.768792	0.768792	2	0	0	OK	0.862531	3.8765	2.16811	3.52676	5e-05	0.0019768	yes	2.36952	2.16811	2.16811	1	1	1
3165	ENSMUSG00000021565	ENSMUSG00000021565	Slc6a19	13:73679744-73709853	solute carrier family 6 (neurotransmitter transporter), member 19 [Source:MGI Symbol;Acc:MGI:1921588]	protein_coding	ENSG00000174358	SLC6A19	NOTEST	0.0805132	0.0856043	0.0884585	0	1	1	no	0.0830587	0.0884585	0.0884585	0	0	0	OK	10.2361	3.87409	-1.40174	-5.17404	5e-05	0.0019768	yes	7.05509	-1.40174	1.40174	2	1	1
16723	ENSMUSG00000059060	ENSMUSG00000059060	Rad51b	12:79297281-79814690	RAD51 paralog B [Source:MGI Symbol;Acc:MGI:1099436]	protein_coding	ENSG00000182185	RAD51B	OK	5.33325	4.05393	-0.395693	-1.23841	0.14275	0.603407	no	4.69359	-0.395693	0.395693	2	0	0	OK	1.87095	3.8106	1.02625	2.65664	0.0019	0.0390934	yes	2.84077	1.02625	1.02625	1	1	1
19630	ENSMUSG00000069892	ENSMUSG00000069892	9930111J21Rik2	11:48904655-49135387	RIKEN cDNA 9930111J21 gene 2 [Source:MGI Symbol;Acc:MGI:3711310]	protein_coding	none	NA	OK	1.63806	1.61727	-0.0184256	-0.0541317	0.9507	0.994556	no	1.62766	-0.0184256	0.0184256	0	0	0	OK	6.02136	3.72493	-0.692877	-2.80191	0.0016	0.0341927	yes	4.87315	-0.692877	0.692877	2	0	0
12827	ENSMUSG00000043289	ENSMUSG00000043289	Mei4	9:81863669-82206007	meiotic double-stranded break formation protein 4 [Source:MGI Symbol;Acc:MGI:1922283]	protein_coding	ENSG00000269964	MEI4	OK	3.40495	3.49638	0.0382271	0.110274	0.89975	0.992805	no	3.45066	0.0382271	0.0382271	2	0	0	OK	6.66947	3.672	-0.861007	-2.77348	0.00165	0.0349961	yes	5.17073	-0.861007	0.861007	2	0	0
10158	ENSMUSG00000035834	ENSMUSG00000035834	Polr3g	13:81673842-81711013	polymerase (RNA) III (DNA directed) polypeptide G [Source:MGI Symbol;Acc:MGI:1914736]	protein_coding	none	NA	OK	10.1506	10.7767	0.0863587	0.203158	0.7996	0.992781	no	10.4637	0.0863587	0.0863587	2	0	0	OK	1.09812	3.65133	1.73338	3.12089	0.00035	0.0105257	yes	2.37473	1.73338	1.73338	1	1	1
6536	ENSMUSG00000028175	ENSMUSG00000028175	Depdc1a	3:159495432-159529955	DEP domain containing 1a [Source:MGI Symbol;Acc:MGI:1923381]	protein_coding	ENSG00000024526	DEPDC1	OK	7.03573	8.29883	0.238208	0.936429	0.2699	0.779963	no	7.66728	0.238208	0.238208	2	0	0	OK	0.676714	3.62564	2.42162	6.03749	5e-05	0.0019768	yes	2.15118	2.42162	2.42162	1	1	1
7684	ENSMUSG00000030165	ENSMUSG00000030165	Klrd1	6:129591781-129598775	killer cell lectin-like receptor, subfamily D, member 1 [Source:MGI Symbol;Acc:MGI:1196275]	protein_coding	ENSG00000134539	KLRD1	OK	2.96406	2.59364	-0.1926	-0.367054	0.6446	0.97821	no	2.77885	-0.1926	0.1926	2	0	0	OK	9.31031	3.58233	-1.37793	-3.24755	0.00045	0.0129202	yes	6.44632	-1.37793	1.37793	2	1	1
2339	ENSMUSG00000020142	ENSMUSG00000020142	Slc1a4	11:20302179-20332713	solute carrier family 1 (glutamate/neutral amino acid transporter), member 4 [Source:MGI Symbol;Acc:MGI:2135601]	protein_coding	ENSG00000115902	SLC1A4	OK	8.35964	3.89148	-1.10312	-4.48486	5e-05	0.0019768	yes	6.12556	-1.10312	1.10312	2	1	1	OK	1.37638	3.47512	1.33618	4.19015	5e-05	0.0019768	yes	2.42575	1.33618	1.33618	1	1	1
7024	ENSMUSG00000028986	ENSMUSG00000028986	Klhl7	5:24100604-24160792	kelch-like 7 [Source:MGI Symbol;Acc:MGI:1196453]	protein_coding	ENSG00000122550	KLHL7	OK	3.55071	1.55071	-1.19518	-3.45993	0.0001	0.00364222	yes	2.55071	-1.19518	1.19518	1	1	1	OK	7.34315	3.4629	-1.08442	-3.94188	5e-05	0.0019768	yes	5.40302	-1.08442	1.08442	2	1	1
11846	ENSMUSG00000040282	ENSMUSG00000040282	BC052040	2:115581715-115778768	cDNA sequence BC052040 [Source:MGI Symbol;Acc:MGI:3026886]	protein_coding	ENSG00000186073	C15orf41	OK	6.18936	5.09607	-0.280404	-1.0452	0.22515	0.728125	no	5.64271	-0.280404	0.280404	2	0	0	OK	1.57475	3.41593	1.11716	3.20832	0.00055	0.0151958	yes	2.49534	1.11716	1.11716	1	1	1
1882	ENSMUSG00000018102	ENSMUSG00000018102	Hist1h2bc	13:23684198-23692908	histone cluster 1, H2bc [Source:MGI Symbol;Acc:MGI:1915274]	protein_coding	ENSG00000278588	HIST1H2BI	OK	16.9856	2.63354	-2.68924	-7.55115	5e-05	0.0019768	yes	9.80957	-2.68924	2.68924	2	1	1	OK	15.2798	3.41373	-2.16221	-6.29244	5e-05	0.0019768	yes	9.34676	-2.16221	2.16221	2	1	1
4695	ENSMUSG00000024812	ENSMUSG00000024812	Tjp2	19:24094504-24225030	tight junction protein 2 [Source:MGI Symbol;Acc:MGI:1341872]	protein_coding	NA	NA	OK	0.941582	1.55857	0.727069	1.54493	0.03175	0.278494	no	1.25008	0.727069	0.727069	0	0	0	OK	1.69595	3.39922	1.00311	2.75235	0.00065	0.017298	yes	2.54759	1.00311	1.00311	1	1	1
22988	ENSMUSG00000079834	ENSMUSG00000079834	Tmlhe	GL456233.1:159646-334183	trimethyllysine hydroxylase, epsilon [Source:NCBI gene;Acc:192289]	protein_coding	ENSG00000185973	TMLHE	OK	4.89239	2.71163	-0.851378	-2.41949	0.0086	0.117341	no	3.80201	-0.851378	0.851378	2	0	0	OK	9.37835	3.37863	-1.4729	-4.60075	5e-05	0.0019768	yes	6.37849	-1.4729	1.4729	2	1	1
2949	ENSMUSG00000021176	ENSMUSG00000021176	Efcab11	12:99693044-99884439	EF-hand calcium binding domain 11 [Source:MGI Symbol;Acc:MGI:1926017]	protein_coding	ENSG00000140025	EFCAB11	OK	4.97082	4.08841	-0.281943	-0.608312	0.45095	0.923876	no	4.52961	-0.281943	0.281943	2	0	0	OK	0	3.37475	inf	-nan	5e-05	0.0019768	yes	1.68738	10	10	1	1	1
5362	ENSMUSG00000026110	ENSMUSG00000026110	Mgat4a	1:37439339-37541016	mannoside acetylglucosaminyltransferase 4, isoenzyme A [Source:MGI Symbol;Acc:MGI:2662992]	protein_coding	ENSG00000071073	MGAT4A	OK	5.7086	6.12225	0.100926	0.279082	0.64505	0.978247	no	5.91542	0.100926	0.100926	2	0	0	OK	6.04156	3.37221	-0.841227	-2.8792	5e-05	0.0019768	yes	4.70688	-0.841227	0.841227	2	0	0
9845	ENSMUSG00000034883	ENSMUSG00000034883	Lrr1	12:69168813-69179009	leucine rich repeat protein 1 [Source:MGI Symbol;Acc:MGI:1916956]	protein_coding	ENSG00000165501	LRR1	OK	5.40099	9.15879	0.761933	2.02776	0.0166	0.181429	no	7.27989	0.761933	0.761933	2	0	0	OK	0.153765	3.35453	4.44731	3.38553	0.0012	0.0273763	yes	1.75415	4.44731	4.44731	1	1	1
8847	ENSMUSG00000032261	ENSMUSG00000032261	Sh3bgrl2	9:83548326-83638801	SH3 domain binding glutamic acid-rich protein like 2 [Source:MGI Symbol;Acc:MGI:1915350]	protein_coding	ENSG00000198478	SH3BGRL2	OK	3.11861	1.80562	-0.788406	-2.53234	0.0034	0.0605305	no	2.46211	-0.788406	0.788406	1	0	0	OK	7.14056	3.30875	-1.10975	-3.9317	5e-05	0.0019768	yes	5.22466	-1.10975	1.10975	2	1	1
20944	ENSMUSG00000074793	ENSMUSG00000074793	Hspa12b	2:131127279-131146321	heat shock protein 12B [Source:MGI Symbol;Acc:MGI:1919880]	protein_coding	ENSG00000132622	HSPA12B	OK	0.324097	0.392494	0.276248	0.370017	0.6073	0.973311	no	0.358295	0.276248	0.276248	0	0	0	OK	7.1185	3.18498	-1.16029	-3.2389	5e-05	0.0019768	yes	5.15174	-1.16029	1.16029	2	1	1
517	ENSMUSG00000002997	ENSMUSG00000002997	Prkar2b	12:31958475-32061296	protein kinase, cAMP dependent regulatory, type II beta [Source:MGI Symbol;Acc:MGI:97760]	protein_coding	ENSG00000005249	PRKAR2B	OK	17.5134	8.67388	-1.01371	-4.55486	5e-05	0.0019768	yes	13.0936	-1.01371	1.01371	2	1	1	OK	8.17279	3.17539	-1.36389	-5.12805	5e-05	0.0019768	yes	5.67409	-1.36389	1.36389	2	1	1
9630	ENSMUSG00000034303	ENSMUSG00000034303	Ccdc15	9:37275259-37348432	coiled-coil domain containing 15 [Source:MGI Symbol;Acc:MGI:2444488]	protein_coding	ENSG00000149548	CCDC15	OK	1.78756	2.31064	0.370301	0.886149	0.29665	0.807702	no	2.0491	0.370301	0.370301	1	0	0	OK	1.39054	3.16953	1.18863	2.86652	0.00175	0.0366759	yes	2.28003	1.18863	1.18863	1	1	1
6033	ENSMUSG00000027313	ENSMUSG00000027313	Chac1	2:119351228-119354381	ChaC, cation transport regulator 1 [Source:MGI Symbol;Acc:MGI:1916315]	protein_coding	ENSG00000128965	CHAC1	OK	9.02786	1.88838	-2.25723	-6.28256	5e-05	0.0019768	yes	5.45812	-2.25723	2.25723	1	1	1	OK	1.34427	3.16279	1.23438	2.95916	0.00165	0.0349961	yes	2.25353	1.23438	1.23438	1	1	1
17846	ENSMUSG00000064065	ENSMUSG00000064065	Ipcef1	10:6740628-7052478	interaction protein for cytohesin exchange factors 1 [Source:MGI Symbol;Acc:MGI:2444159]	protein_coding	ENSG00000074706	IPCEF1	OK	2.50492	2.46861	-0.0210696	-0.0560846	0.93865	0.99371	no	2.48677	-0.0210696	0.0210696	2	0	0	OK	5.15262	3.10492	-0.73075	-2.40849	0.0022	0.0437041	yes	4.12877	-0.73075	0.73075	2	0	0
14822	ENSMUSG00000050556	ENSMUSG00000050556	Kcnb1	2:167095968-167240604	potassium voltage gated channel, Shab-related subfamily, member 1 [Source:MGI Symbol;Acc:MGI:96666]	protein_coding	ENSG00000158445	KCNB1	OK	1.26822	1.41462	0.157612	0.294483	0.73095	0.990729	no	1.34142	0.157612	0.157612	0	0	0	OK	0.321193	3.07491	3.25903	5.26871	5e-05	0.0019768	yes	1.69805	3.25903	3.25903	1	1	1
8080	ENSMUSG00000030878	ENSMUSG00000030878	Cdr2	7:120957035-120982312	cerebellar degeneration-related 2 [Source:MGI Symbol;Acc:MGI:1100885]	protein_coding	ENSG00000140743	AC092338.1	OK	5.92665	6.25956	0.078845	0.293431	0.7336	0.990864	no	6.0931	0.078845	0.078845	2	0	0	OK	1.45964	2.95459	1.01735	2.73685	0.0021	0.0421329	yes	2.20711	1.01735	1.01735	1	1	1
8826	ENSMUSG00000032221	ENSMUSG00000032221	Mns1	9:72438010-72492212	meiosis-specific nuclear structural protein 1 [Source:MGI Symbol;Acc:MGI:107933]	protein_coding	ENSG00000138587	MNS1	OK	7.60903	10.8707	0.514663	0.956492	0.2605	0.768947	no	9.23986	0.514663	0.514663	2	0	0	OK	0.144814	2.78854	4.26724	3.75544	0.0005	0.0140204	yes	1.46668	4.26724	4.26724	1	1	1
669	ENSMUSG00000004085	ENSMUSG00000004085	Map3k20	2:72285636-72442610	mitogen-activated protein kinase kinase kinase 20 [Source:MGI Symbol;Acc:MGI:2443258]	protein_coding	ENSG00000091436	MAP3K20	OK	3.53831	4.18111	0.240823	0.804925	0.3082	0.818085	no	3.85971	0.240823	0.240823	2	0	0	OK	1.2878	2.78324	1.11186	2.5977	0.00015	0.00513825	yes	2.03552	1.11186	1.11186	1	1	1
3739	ENSMUSG00000022528	ENSMUSG00000022528	Hes1	16:30064383-30067796	hes family bHLH transcription factor 1 [Source:MGI Symbol;Acc:MGI:104853]	protein_coding	ENSG00000114315	HES1	OK	37.4765	19.9182	-0.911899	-2.64844	0.0024	0.0467714	yes	28.6974	-0.911899	0.911899	2	0	0	OK	6.79308	2.7689	-1.29475	-2.67123	0.0009	0.022329	yes	4.78099	-1.29475	1.29475	2	1	1
12639	ENSMUSG00000042599	ENSMUSG00000042599	Kdm7a	6:39118472-39206789	lysine (K)-specific demethylase 7A [Source:MGI Symbol;Acc:MGI:2443388]	protein_coding	ENSG00000006459	KDM7A	OK	1.66503	0.598109	-1.47706	-4.76282	5e-05	0.0019768	yes	1.13157	-1.47706	1.47706	0	1	0	OK	6.31527	2.76585	-1.19112	-5.46889	5e-05	0.0019768	yes	4.54056	-1.19112	1.19112	2	1	1
16001	ENSMUSG00000055733	ENSMUSG00000055733	Nap1l3	X:122394564-122397401	nucleosome assembly protein 1-like 3 [Source:MGI Symbol;Acc:MGI:1859565]	protein_coding	ENSG00000186310	NAP1L3	OK	1.406	0.894691	-0.652135	-1.55019	0.0747	0.452191	no	1.15035	-0.652135	0.652135	0	0	0	OK	5.70179	2.7493	-1.05235	-3.53451	0.00015	0.00513825	yes	4.22555	-1.05235	1.05235	2	1	1
10878	ENSMUSG00000037887	ENSMUSG00000037887	Dusp8	7:142079489-142125189	dual specificity phosphatase 8 [Source:MGI Symbol;Acc:MGI:106626]	protein_coding	ENSG00000184545	DUSP8	OK	0.58454	0.0767182	-2.92966	-2.68206	0.00085	0.0213895	yes	0.330629	-2.92966	2.92966	0	1	0	OK	1.51633	2.69579	0.830122	2.68485	0.0017	0.035841	yes	2.10606	0.830122	0.830122	1	0	0
16848	ENSMUSG00000059588	ENSMUSG00000059588	Calcrl	2:84330625-84425411	calcitonin receptor-like [Source:MGI Symbol;Acc:MGI:1926944]	protein_coding	ENSG00000064989	CALCRL	OK	3.13112	2.61644	-0.259073	-0.472703	0.52635	0.950742	no	2.87378	-0.259073	0.259073	2	0	0	OK	9.03245	2.64128	-1.77388	-4.76668	5e-05	0.0019768	yes	5.83687	-1.77388	1.77388	2	1	1
7723	ENSMUSG00000030231	ENSMUSG00000030231	Plekha5	6:140424053-140597110	pleckstrin homology domain containing, family A member 5 [Source:MGI Symbol;Acc:MGI:1923802]	protein_coding	ENSG00000052126	PLEKHA5	OK	5.44048	2.45819	-1.14613	-2.05191	0.00535	0.0845717	no	3.94934	-1.14613	1.14613	2	1	0	OK	6.08803	2.55529	-1.25249	-2.42071	0.0024	0.0467714	yes	4.32166	-1.25249	1.25249	2	1	1
20034	ENSMUSG00000071398	ENSMUSG00000071398	2410004P03Rik	12:17003318-17011727	RIKEN cDNA 2410004P03 gene [Source:MGI Symbol;Acc:MGI:1920917]	protein_coding	none	NA	NOTEST	0	0.0237525	inf	0	1	1	no	0.0118762	10	10	0	1	0	OK	6.13577	2.54854	-1.26757	-2.61472	0.0026	0.0494895	yes	4.34215	-1.26757	1.26757	2	1	1
11523	ENSMUSG00000039384	ENSMUSG00000039384	Dusp10	1:184013301-184075636	dual specificity phosphatase 10 [Source:MGI Symbol;Acc:MGI:1927070]	protein_coding	ENSG00000143507	DUSP10	OK	1.94077	1.77135	-0.131774	-0.345962	0.67755	0.98239	no	1.85606	-0.131774	0.131774	0	0	0	OK	1.18072	2.40148	1.02426	2.64477	0.0025	0.0482205	yes	1.7911	1.02426	1.02426	1	1	1
31422	ENSMUSG00000091183	ENSMUSG00000091183	Gm5141	13:62772199-62785808	predicted gene 5141 [Source:MGI Symbol;Acc:MGI:3779466]	protein_coding	none	NA	OK	2.59021	2.25573	-0.199473	-0.364356	0.5895	0.970309	no	2.42297	-0.199473	0.199473	2	0	0	OK	4.57139	2.39693	-0.931444	-2.58527	0.0021	0.0421329	yes	3.48416	-0.931444	0.931444	2	0	0
19601	ENSMUSG00000069743	ENSMUSG00000069743	Zfp820	17:21816884-21845772	zinc finger protein 820 [Source:MGI Symbol;Acc:MGI:1922674]	protein_coding	NA	NA	OK	2.18168	2.20675	0.0164811	0.051623	0.95355	0.994937	no	2.19421	0.0164811	0.0164811	2	0	0	OK	4.40259	2.38002	-0.88738	-3.08188	0.0004	0.0117599	yes	3.39131	-0.88738	0.88738	2	0	0
8605	ENSMUSG00000031842	ENSMUSG00000031842	Pde4c	8:70723719-70751186	phosphodiesterase 4C, cAMP specific [Source:MGI Symbol;Acc:MGI:99556]	protein_coding	NA	NA	OK	0.200582	0.506326	1.33587	1.00471	0.1308	0.591921	no	0.353454	1.33587	1.33587	0	1	0	OK	0.695333	2.32875	1.74378	2.28128	0.00155	0.0333643	yes	1.51204	1.74378	1.74378	1	1	1
1589	ENSMUSG00000015342	ENSMUSG00000015342	Xk	X:9272755-9313250	X-linked Kx blood group [Source:MGI Symbol;Acc:MGI:103569]	protein_coding	ENSG00000047597	XK	OK	3.59139	3.53539	-0.0226717	-0.0892499	0.91695	0.993025	no	3.56339	-0.0226717	0.0226717	2	0	0	OK	3.58602	2.17739	-0.719782	-2.64598	0.00245	0.047516	yes	2.88171	-0.719782	0.719782	2	0	0
6683	ENSMUSG00000028438	ENSMUSG00000028438	Kif24	4:41390744-41464887	kinesin family member 24 [Source:MGI Symbol;Acc:MGI:1918345]	protein_coding	ENSG00000186638	KIF24	OK	4.51364	5.26694	0.222674	0.536179	0.4771	0.933549	no	4.89029	0.222674	0.222674	2	0	0	OK	0.480074	2.16882	2.17558	2.85022	0.0001	0.00364222	yes	1.32445	2.17558	2.17558	1	1	1
11677	ENSMUSG00000039814	ENSMUSG00000039814	Xkr5	8:18932728-18950975	X-linked Kx blood group related 5 [Source:MGI Symbol;Acc:MGI:2442327]	protein_coding	ENSG00000275591	XKR5	OK	7.27217	6.92002	-0.0716093	-0.289789	0.73295	0.990747	no	7.0961	-0.0716093	0.0716093	2	0	0	OK	0.126097	2.09751	4.05607	6.21118	5e-05	0.0019768	yes	1.1118	4.05607	4.05607	1	1	1
8701	ENSMUSG00000031988	ENSMUSG00000031988	Vps26b	9:27007770-27030065	VPS26 retromer complex component B [Source:MGI Symbol;Acc:MGI:1917656]	protein_coding	ENSG00000151502	VPS26B	OK	7.92621	6.4455	-0.298337	-1.26444	0.13685	0.599428	no	7.18586	-0.298337	0.298337	2	0	0	OK	4.07039	2.08115	-0.967787	-3.22517	0.0001	0.00364222	yes	3.07577	-0.967787	0.967787	2	0	0
5780	ENSMUSG00000026826	ENSMUSG00000026826	Nr4a2	2:57106829-57124003	nuclear receptor subfamily 4, group A, member 2 [Source:MGI Symbol;Acc:MGI:1352456]	protein_coding	ENSG00000153234	NR4A2	OK	6.21792	4.1488	-0.583739	-0.404552	0.32505	0.833515	no	5.18336	-0.583739	0.583739	2	0	0	OK	0.585354	2.02709	1.79203	2.4604	0.0012	0.0273763	yes	1.30622	1.79203	1.79203	1	1	1
4212	ENSMUSG00000023963	ENSMUSG00000023963	Cyp39a1	17:43667424-43751431	cytochrome P450, family 39, subfamily a, polypeptide 1 [Source:MGI Symbol;Acc:MGI:1927096]	protein_coding	ENSG00000146233	CYP39A1	OK	0.404006	0.0870675	-2.21417	-1.50464	0.0251	0.238842	no	0.245537	-2.21417	2.21417	0	1	0	OK	4.33544	2.01238	-1.10728	-2.93651	0.00115	0.026888	yes	3.17391	-1.10728	1.10728	2	1	1
15780	ENSMUSG00000054675	ENSMUSG00000054675	Tmem119	5:113793728-113800516	transmembrane protein 119 [Source:MGI Symbol;Acc:MGI:2385228]	protein_coding	ENSG00000183160	TMEM119	OK	342.167	331.935	-0.0438028	-0.188193	0.79725	0.992781	no	337.051	-0.0438028	0.0438028	2	0	0	OK	4.49802	1.82473	-1.30161	-3.1006	0.00015	0.00513825	yes	3.16138	-1.30161	1.30161	1	1	1
11135	ENSMUSG00000038463	ENSMUSG00000038463	Olfml2b	1:170644531-170682789	olfactomedin-like 2B [Source:MGI Symbol;Acc:MGI:2443310]	protein_coding	ENSG00000162745	OLFML2B	OK	0.202189	1.38064	2.77156	5.22827	0.0001	0.00364222	yes	0.791415	2.77156	2.77156	0	1	0	OK	0.459555	1.80971	1.97745	4.35688	5e-05	0.0019768	yes	1.13463	1.97745	1.97745	0	1	0
8789	ENSMUSG00000032122	ENSMUSG00000032122	Slc37a2	9:37227584-37256149	solute carrier family 37 (glycerol-3-phosphate transporter), member 2 [Source:MGI Symbol;Acc:MGI:1929693]	protein_coding	ENSG00000134955	SLC37A2	OK	2.63761	3.91643	0.570309	1.77246	0.0405	0.323966	no	3.27702	0.570309	0.570309	2	0	0	OK	0.493884	1.75801	1.8317	3.94385	0.0003	0.00925391	yes	1.12595	1.8317	1.8317	0	1	0
14081	ENSMUSG00000047766	ENSMUSG00000047766	Lrrc49	9:60568858-60690397	leucine rich repeat containing 49 [Source:MGI Symbol;Acc:MGI:2442689]	protein_coding	ENSG00000137821	LRRC49	OK	0.479355	1.0781	1.16933	1.66342	0.01665	0.181729	no	0.778728	1.16933	1.16933	0	1	0	OK	0.363291	1.73888	2.25896	3.23454	5e-05	0.0019768	yes	1.05109	2.25896	2.25896	0	1	0
7218	ENSMUSG00000029299	ENSMUSG00000029299	Abcg3	5:104935056-104982718	ATP binding cassette subfamily G member 3 [Source:MGI Symbol;Acc:MGI:1351624]	protein_coding	ENSG00000118777	ABCG2	OK	2.65454	1.74281	-0.607043	-1.78375	0.03855	0.31443	no	2.19867	-0.607043	0.607043	1	0	0	OK	3.61916	1.7355	-1.0603	-3.22674	0.00085	0.0213895	yes	2.67733	-1.0603	1.0603	1	1	1
19766	ENSMUSG00000070407	ENSMUSG00000070407	Hs3st3b1	11:63885791-63922290	heparan sulfate (glucosamine) 3-O-sulfotransferase 3B1 [Source:MGI Symbol;Acc:MGI:1333853]	protein_coding	ENSG00000125430	HS3ST3B1	OK	2.67412	2.07962	-0.362745	-1.26885	0.14515	0.605477	no	2.37687	-0.362745	0.362745	2	0	0	OK	3.02018	1.65924	-0.864112	-2.95979	0.0008	0.0204598	yes	2.33971	-0.864112	0.864112	1	0	0
13406	ENSMUSG00000045333	ENSMUSG00000045333	Zfp423	8:87661809-87959595	zinc finger protein 423 [Source:MGI Symbol;Acc:MGI:1891217]	protein_coding	ENSG00000102935	ZNF423	OK	0.857699	0.685676	-0.322944	-0.225569	0.7565	0.99264	no	0.771687	-0.322944	0.322944	0	0	0	OK	0.193014	1.56784	3.02201	2.08365	0.00075	0.0193743	yes	0.880427	3.02201	3.02201	0	1	0
4186	ENSMUSG00000023915	ENSMUSG00000023915	Tnfrsf21	17:43016554-43089189	tumor necrosis factor receptor superfamily, member 21 [Source:MGI Symbol;Acc:MGI:2151075]	protein_coding	ENSG00000146072	TNFRSF21	OK	6.31207	5.82265	-0.116437	-0.457037	0.5934	0.971235	no	6.06736	-0.116437	0.116437	2	0	0	OK	3.08735	1.50903	-1.03275	-3.11118	0.001	0.0241412	yes	2.29819	-1.03275	1.03275	1	1	1
15360	ENSMUSG00000052749	ENSMUSG00000052749	Trim30b	7:104355381-104369884	tripartite motif-containing 30B [Source:MGI Symbol;Acc:MGI:4821256]	protein_coding	none	NA	OK	0.460564	0.183142	-1.33044	-1.55212	0.029	0.262367	no	0.321853	-1.33044	1.33044	0	1	0	OK	3.37042	1.42405	-1.24293	-3.45704	5e-05	0.0019768	yes	2.39724	-1.24293	1.24293	1	1	1
19524	ENSMUSG00000069270	ENSMUSG00000069270	Hist1h2ac	13:23681466-23683948	histone cluster 1, H2ac [Source:MGI Symbol;Acc:MGI:2448287]	protein_coding	ENSG00000277075	HIST1H2AE	OK	0.41055	0.0848734	-2.27418	-2.88643	0.01065	0.133374	no	0.247712	-2.27418	2.27418	0	1	0	OK	4.49073	1.41708	-1.66403	-4.70843	5e-05	0.0019768	yes	2.9539	-1.66403	1.66403	1	1	1
15851	ENSMUSG00000054999	ENSMUSG00000054999	Naaladl1	19:6105781-6115792	N-acetylated alpha-linked acidic dipeptidase-like 1 [Source:MGI Symbol;Acc:MGI:2685810]	protein_coding	ENSG00000168060	NAALADL1	OK	1.84021	1.84147	0.000990433	0.00264734	0.99275	0.998104	no	1.84084	0.000990433	0.000990433	0	0	0	OK	0	1.40512	inf	-nan	5e-05	0.0019768	yes	0.70256	10	10	0	1	0
1106	ENSMUSG00000007591	ENSMUSG00000007591	Tssk4	14:55650183-55652539	testis-specific serine kinase 4 [Source:MGI Symbol;Acc:MGI:1918349]	protein_coding	ENSG00000139908	TSSK4	OK	0.54537	0.715097	0.390904	0.641049	0.40265	0.894676	no	0.630234	0.390904	0.390904	0	0	0	OK	0.458544	1.39262	1.60267	2.7835	0.0019	0.0390934	yes	0.925582	1.60267	1.60267	0	1	0
5477	ENSMUSG00000026308	ENSMUSG00000026308	Klhl30	1:91351015-91362416	kelch-like 30 [Source:MGI Symbol;Acc:MGI:1918038]	protein_coding	ENSG00000168427	KLHL30	OK	0.49977	0.62455	0.321553	0.665718	0.4437	0.919203	no	0.56216	0.321553	0.321553	0	0	0	OK	0.575638	1.35559	1.23569	2.84296	0.00255	0.0488675	yes	0.965614	1.23569	1.23569	0	1	0
10077	ENSMUSG00000035561	ENSMUSG00000035561	Aldh1b1	4:45799021-45804604	aldehyde dehydrogenase 1 family, member B1 [Source:MGI Symbol;Acc:MGI:1919785]	protein_coding	ENSG00000137124	ALDH1B1	OK	6.84822	4.21203	-0.701212	-1.45634	0.07065	0.438689	no	5.53012	-0.701212	0.701212	2	0	0	OK	4.24297	1.34727	-1.65503	-3.05976	0.0001	0.00364222	yes	2.79512	-1.65503	1.65503	1	1	1
11258	ENSMUSG00000038729	ENSMUSG00000038729	Akap2	4:57434246-57896984	A kinase (PRKA) anchor protein 2 [Source:MGI Symbol;Acc:MGI:1306795]	protein_coding	ENSG00000241978	AKAP2	OK	1.59087	0.713366	-1.15711	-1.11201	0.03265	0.283523	no	1.15212	-1.15711	1.15711	0	1	0	OK	5.58159	1.30375	-2.09801	-3.6675	0.0001	0.00364222	yes	3.44267	-2.09801	2.09801	1	1	1
5949	ENSMUSG00000027171	ENSMUSG00000027171	Prrg4	2:104830740-104849876	proline rich Gla (G-carboxyglutamic acid) 4 (transmembrane) [Source:MGI Symbol;Acc:MGI:2442211]	protein_coding	ENSG00000135378	PRRG4	OK	0.963987	0.677225	-0.509379	-1.02932	0.21335	0.713841	no	0.820606	-0.509379	0.509379	0	0	0	OK	2.7886	1.23688	-1.17283	-3.01997	0.0008	0.0204598	yes	2.01274	-1.17283	1.17283	1	1	1
13906	ENSMUSG00000047143	ENSMUSG00000047143	Dmrta2	4:109978052-109983687	doublesex and mab-3 related transcription factor like family A2 [Source:MGI Symbol;Acc:MGI:2653629]	protein_coding	ENSG00000142700	DMRTA2	OK	1.20432	0.461842	-1.38275	-2.98895	0.00175	0.0366759	yes	0.833081	-1.38275	1.38275	0	1	0	OK	3.20167	1.18541	-1.43343	-4.00754	0.0002	0.00660246	yes	2.19354	-1.43343	1.43343	1	1	1
13715	ENSMUSG00000046480	ENSMUSG00000046480	Scn4b	9:45138394-45154152	sodium channel, type IV, beta [Source:MGI Symbol;Acc:MGI:2687406]	protein_coding	ENSG00000177098	SCN4B	OK	3.57233	3.1908	-0.162945	-0.624038	0.46865	0.930439	no	3.38157	-0.162945	0.162945	2	0	0	OK	2.29404	1.15367	-0.991665	-3.10344	0.00075	0.0193743	yes	1.72385	-0.991665	0.991665	1	0	0
102	ENSMUSG00000000579	ENSMUSG00000000579	Dynlt1c	17:6601670-6609774	dynein light chain Tctex-type 1C [Source:MGI Symbol;Acc:MGI:3807476]	protein_coding	NA	NA	OK	0.437015	0.579252	0.406508	0.339741	0.65245	0.978501	no	0.508134	0.406508	0.406508	0	0	0	OK	0.0835567	1.14573	3.77737	2.09664	0.002	0.0405447	yes	0.614643	3.77737	3.77737	0	1	0
5350	ENSMUSG00000026090	ENSMUSG00000026090	2010300C02Rik	1:37611676-37720085	RIKEN cDNA 2010300C02 gene [Source:MGI Symbol;Acc:MGI:1919347]	protein_coding	ENSG00000196872	KIAA1211L	NOTEST	0.283864	0.208542	-0.444862	0	1	1	no	0.246203	-0.444862	0.444862	0	0	0	OK	2.66536	1.07939	-1.30411	-3.3577	0.0002	0.00660246	yes	1.87238	-1.30411	1.30411	1	1	1
14344	ENSMUSG00000048720	ENSMUSG00000048720	Tbc1d12	19:38836578-38919923	TBC1D12: TBC1 domain family, member 12 [Source:MGI Symbol;Acc:MGI:2384803]	protein_coding	ENSG00000108239	TBC1D12	OK	0.671385	0.40799	-0.718607	-1.56864	0.06935	0.434298	no	0.539687	-0.718607	0.718607	0	0	0	OK	2.18957	1.07644	-1.02437	-3.01965	0.00095	0.0233132	yes	1.633	-1.02437	1.02437	1	1	1
17634	ENSMUSG00000063163	ENSMUSG00000063163	Speer2	16:69856873-69863744	spermatogenesis associated glutamate (E)-rich protein 2 [Source:MGI Symbol;Acc:MGI:2668488]	protein_coding	none	NA	OK	0.481591	0	-inf	-nan	0.00265	0.0502378	no	0.240795	-10	10	0	1	0	OK	4.48732	1.06306	-2.07764	-2.71897	0.0013	0.0291624	yes	2.77519	-2.07764	2.07764	1	1	1
78	ENSMUSG00000000402	ENSMUSG00000000402	Egfl6	X:166523006-166585720	EGF-like-domain, multiple 6 [Source:MGI Symbol;Acc:MGI:1858599]	protein_coding	ENSG00000198759	EGFL6	NOTEST	0.0311746	0.00699822	-2.15531	0	1	1	no	0.0190864	-2.15531	2.15531	0	1	0	OK	0.292284	1.04311	1.83546	3.58917	0.00135	0.0300569	yes	0.667697	1.83546	1.83546	0	1	0
19545	ENSMUSG00000069310	ENSMUSG00000069310	Hist1h3c	13:23744972-23745602	histone cluster 1, H3c [Source:MGI Symbol;Acc:MGI:2448320]	protein_coding	none	NA	OK	2.56058	1.36435	-0.908262	-1.58477	0.07385	0.449748	no	1.96246	-0.908262	0.908262	1	0	0	OK	0	1.026	inf	-nan	5e-05	0.0019768	yes	0.513	10	10	0	1	0
4751	ENSMUSG00000024909	ENSMUSG00000024909	Efemp2	19:5473953-5488402	epidermal growth factor-containing fibulin-like extracellular matrix protein 2 [Source:MGI Symbol;Acc:MGI:1891209]	protein_coding	ENSG00000172638	EFEMP2	NOTEST	0.114814	0.0402595	-1.5119	0	1	1	no	0.0775368	-1.5119	1.5119	0	1	0	OK	0	0.941865	inf	-nan	5e-05	0.0019768	yes	0.470932	10	10	0	1	0
2369	ENSMUSG00000020185	ENSMUSG00000020185	E2f7	10:110745438-110896550	E2F transcription factor 7 [Source:MGI Symbol;Acc:MGI:1289147]	protein_coding	ENSG00000165891	E2F7	OK	4.38931	6.26572	0.513486	1.3663	0.06305	0.413382	no	5.32752	0.513486	0.513486	2	0	0	OK	0.0630387	0.873944	3.79323	1.15959	0.0002	0.00660246	yes	0.468491	3.79323	3.79323	0	1	0
3897	ENSMUSG00000022799	ENSMUSG00000022799	Arhgap31	16:38598339-38713274	Rho GTPase activating protein 31 [Source:MGI Symbol;Acc:MGI:1333857]	protein_coding	ENSG00000031081	ARHGAP31	OK	3.79157	3.74613	-0.0173955	-0.0608423	0.94155	0.993926	no	3.76885	-0.0173955	0.0173955	2	0	0	OK	1.47637	0.7994	-0.885061	-2.67135	0.0021	0.0421329	yes	1.13789	-0.885061	0.885061	0	0	0
5450	ENSMUSG00000026255	ENSMUSG00000026255	Efhd1	1:87264362-87310839	EF hand domain containing 1 [Source:MGI Symbol;Acc:MGI:1921607]	protein_coding	ENSG00000115468	EFHD1	OK	3.92644	1.75446	-1.16219	-2.53528	0.0025	0.0482205	yes	2.84045	-1.16219	1.16219	1	1	1	OK	2.41551	0.792514	-1.60782	-3.26766	0.00065	0.017298	yes	1.60401	-1.60782	1.60782	1	1	1
3600	ENSMUSG00000022309	ENSMUSG00000022309	Angpt1	15:42424722-42704616	angiopoietin 1 [Source:MGI Symbol;Acc:MGI:108448]	protein_coding	ENSG00000154188	ANGPT1	NOTEST	0.00960778	0.00870071	-0.143069	0	1	1	no	0.00915425	-0.143069	0.143069	0	0	0	OK	3.68507	0.744778	-2.30681	-6.42394	5e-05	0.0019768	yes	2.21492	-2.30681	2.30681	1	1	1
8176	ENSMUSG00000031129	ENSMUSG00000031129	Slc9a9	9:94669908-95230445	solute carrier family 9 (sodium/hydrogen exchanger), member 9 [Source:MGI Symbol;Acc:MGI:2679732]	protein_coding	ENSG00000181804	SLC9A9	OK	1.30707	1.33694	0.0325905	0.0831286	0.91825	0.993025	no	1.322	0.0325905	0.0325905	0	0	0	OK	1.85204	0.732623	-1.33797	-3.0504	0.0016	0.0341927	yes	1.29233	-1.33797	1.33797	0	1	0
13359	ENSMUSG00000045180	ENSMUSG00000045180	Shroom2	X:152609508-152769465	shroom family member 2 [Source:MGI Symbol;Acc:MGI:107194]	protein_coding	ENSG00000146950	SHROOM2	NOTEST	0.0619493	0.0576265	-0.104357	0	1	1	no	0.0597879	-0.104357	0.104357	0	0	0	OK	2.41881	0.687177	-1.81554	-4.34598	5e-05	0.0019768	yes	1.55299	-1.81554	1.81554	1	1	1
8243	ENSMUSG00000031239	ENSMUSG00000031239	Itm2a	X:107397098-107403376	integral membrane protein 2A [Source:MGI Symbol;Acc:MGI:107706]	protein_coding	ENSG00000078596	ITM2A	OK	11.4876	0.930783	-3.62549	-9.03832	5e-05	0.0019768	yes	6.20919	-3.62549	3.62549	1	1	1	OK	2.63115	0.681936	-1.94799	-4.18105	0.0003	0.00925391	yes	1.65654	-1.94799	1.94799	1	1	1
17872	ENSMUSG00000064179	ENSMUSG00000064179	Tnnt1	7:4504569-4516382	troponin T1, skeletal, slow [Source:MGI Symbol;Acc:MGI:1333868]	protein_coding	ENSG00000105048	TNNT1	OK	2.22767	5.26431	1.24071	1.89017	0.01055	0.133374	no	3.74599	1.24071	1.24071	2	1	0	OK	0	0.644781	inf	-nan	5e-05	0.0019768	yes	0.322391	10	10	0	1	0
14504	ENSMUSG00000049350	ENSMUSG00000049350	Zg16	7:127050155-127087328	zymogen granule protein 16 [Source:MGI Symbol;Acc:MGI:1916286]	protein_coding	ENSG00000174992	ZG16	OK	0.670402	0.531457	-0.335074	-0.245072	0.75275	0.99264	no	0.60093	-0.335074	0.335074	0	0	0	OK	0	0.626722	inf	-nan	5e-05	0.0019768	yes	0.313361	10	10	0	1	0
10902	ENSMUSG00000037949	ENSMUSG00000037949	Ano10	9:122175873-122294423	anoctamin 10 [Source:MGI Symbol;Acc:MGI:2143103]	protein_coding	ENSG00000160746	ANO10	OK	7.46513	1.06386	-2.81086	-4.67327	5e-05	0.0019768	yes	4.2645	-2.81086	2.81086	1	1	1	OK	4.70945	0.604531	-2.96167	-3.76636	5e-05	0.0019768	yes	2.65699	-2.96167	2.96167	1	1	1
4469	ENSMUSG00000024395	ENSMUSG00000024395	Lims2	18:31922289-31958619	LIM and senescent cell antigen like domains 2 [Source:MGI Symbol;Acc:MGI:2385067]	protein_coding	ENSG00000072163	LIMS2	OK	0.381344	0.331532	-0.201945	-0.0914126	0.82565	0.992781	no	0.356438	-0.201945	0.201945	0	0	0	OK	0	0.602156	inf	-nan	5e-05	0.0019768	yes	0.301078	10	10	0	1	0
20939	ENSMUSG00000074780	ENSMUSG00000074780	Anapc15-ps	10:95672990-95673451	anaphase prompoting complex C subunit 15, pseudogene [Source:MGI Symbol;Acc:MGI:3646302]	protein_coding	ENSG00000110200	ANAPC15	OK	0.39923	0.992869	1.31439	0.873442	0.1755	0.656354	no	0.696049	1.31439	1.31439	0	1	0	OK	0	0.593735	inf	-nan	5e-05	0.0019768	yes	0.296868	10	10	0	1	0
1721	ENSMUSG00000016487	ENSMUSG00000016487	Ppfibp1	6:146888486-147032025	PTPRF interacting protein, binding protein 1 (liprin beta 1) [Source:MGI Symbol;Acc:MGI:1914783]	protein_coding	ENSG00000110841	PPFIBP1	OK	2.09481	1.09849	-0.931294	-1.75482	0.00665	0.0995964	no	1.59665	-0.931294	0.931294	1	0	0	OK	1.62387	0.589189	-1.46263	-1.81178	0.00255	0.0488675	yes	1.10653	-1.46263	1.46263	0	1	0
2038	ENSMUSG00000018986	ENSMUSG00000018986	Slfn3	11:83191329-83215154	schlafen 3 [Source:MGI Symbol;Acc:MGI:1329005]	protein_coding	NA	NA	OK	0.689449	0.950775	0.46366	0.934477	0.276	0.787188	no	0.820112	0.46366	0.46366	0	0	0	OK	0	0.58353	inf	-nan	5e-05	0.0019768	yes	0.291765	10	10	0	1	0
11600	ENSMUSG00000039629	ENSMUSG00000039629	Strip2	6:29917011-29959681	striatin interacting protein 2 [Source:MGI Symbol;Acc:MGI:2444363]	protein_coding	ENSG00000128578	STRIP2	NOTEST	0.0230229	0.0208491	-0.143086	0	1	1	no	0.021936	-0.143086	0.143086	0	0	0	OK	0.183179	0.579678	1.662	3.1655	0.0005	0.0140204	yes	0.381429	1.662	1.662	0	1	0
3597	ENSMUSG00000022305	ENSMUSG00000022305	Lrp12	15:39870588-39943994	low density lipoprotein-related protein 12 [Source:MGI Symbol;Acc:MGI:2443132]	protein_coding	ENSG00000147650	LRP12	OK	2.32517	1.54223	-0.592321	-1.48995	0.05915	0.397466	no	1.9337	-0.592321	0.592321	1	0	0	OK	2.30271	0.557775	-2.04558	-3.52239	0.0001	0.00364222	yes	1.43024	-2.04558	2.04558	1	1	1
7764	ENSMUSG00000030306	ENSMUSG00000030306	Tmtc1	6:148232429-148444389	transmembrane and tetratricopeptide repeat containing 1 [Source:MGI Symbol;Acc:MGI:3039590]	protein_coding	ENSG00000133687	TMTC1	NOTEST	0.260923	0.0502425	-2.37664	0	1	1	no	0.155583	-2.37664	2.37664	0	1	0	OK	1.79601	0.502642	-1.8372	-4.66083	5e-05	0.0019768	yes	1.14933	-1.8372	1.8372	0	1	0
5675	ENSMUSG00000026650	ENSMUSG00000026650	Meig1	2:3409042-3422648	meiosis expressed gene 1 [Source:MGI Symbol;Acc:MGI:1202878]	protein_coding	ENSG00000197889	MEIG1	NOTEST	0.179453	0.242952	0.437066	0	1	1	no	0.211203	0.437066	0.437066	0	0	0	OK	0	0.474961	inf	-nan	5e-05	0.0019768	yes	0.237481	10	10	0	1	0
19498	ENSMUSG00000069117	ENSMUSG00000069117	Gm10260	13:97751111-97760965	predicted gene 10260 [Source:MGI Symbol;Acc:MGI:3642298]	protein_coding	none	NA	OK	1.20029	0.742125	-0.69365	-0.938681	0.2783	0.789438	no	0.971208	-0.69365	0.69365	0	0	0	OK	0	0.440697	inf	-nan	5e-05	0.0019768	yes	0.220349	10	10	0	1	0
1951	ENSMUSG00000018554	ENSMUSG00000018554	Ybx2	11:69935795-69941605	Y box protein 2 [Source:MGI Symbol;Acc:MGI:1096372]	protein_coding	ENSG00000006047	YBX2	OK	0.518781	0.135518	-1.93664	-1.05104	0.1966	0.690474	no	0.32715	-1.93664	1.93664	0	1	0	OK	0	0.395875	inf	-nan	5e-05	0.0019768	yes	0.197937	10	10	0	1	0
6519	ENSMUSG00000028141	ENSMUSG00000028141	Oaz3	3:94413272-94451130	ornithine decarboxylase antizyme 3 [Source:MGI Symbol;Acc:MGI:1858170]	protein_coding	ENSG00000143450	OAZ3	NOTEST	0	0.0908598	inf	0	1	1	no	0.0454299	10	10	0	1	0	OK	0	0.393877	inf	-nan	0.00195	0.0398894	yes	0.196938	10	10	0	1	0
2021	ENSMUSG00000018909	ENSMUSG00000018909	Arrb1	7:99535465-99606771	arrestin, beta 1 [Source:MGI Symbol;Acc:MGI:99473]	protein_coding	ENSG00000137486	ARRB1	OK	1.53144	0.790755	-0.953584	-0.803291	0.1569	0.624523	no	1.1611	-0.953584	0.953584	0	0	0	OK	1.70632	0.379642	-2.16818	-1.32241	0.0016	0.0341927	yes	1.04298	-2.16818	2.16818	0	1	0
19322	ENSMUSG00000068154	ENSMUSG00000068154	Insm1	2:146221920-146225020	insulinoma-associated 1 [Source:MGI Symbol;Acc:MGI:1859980]	protein_coding	ENSG00000173404	INSM1	OK	0.780448	0.189132	-2.04491	-3.77487	0.00145	0.0317447	yes	0.48479	-2.04491	2.04491	0	1	0	OK	1.33041	0.369529	-1.84811	-3.96764	5e-05	0.0019768	yes	0.84997	-1.84811	1.84811	0	1	0
9030	ENSMUSG00000032547	ENSMUSG00000032547	Ryk	9:102834916-102908305	receptor-like tyrosine kinase [Source:MGI Symbol;Acc:MGI:101766]	protein_coding	ENSG00000163785	RYK	OK	4.92511	0.934032	-2.39861	-5.22396	5e-05	0.0019768	yes	2.92957	-2.39861	2.39861	1	1	1	OK	2.13746	0.364127	-2.55338	-3.36409	5e-05	0.0019768	yes	1.25079	-2.55338	2.55338	1	1	1
13726	ENSMUSG00000046532	ENSMUSG00000046532	Ar	X:98148768-98323215	androgen receptor [Source:MGI Symbol;Acc:MGI:88064]	protein_coding	ENSG00000169083	AR	OK	0.387958	0.0952916	-2.02548	-4.21771	5e-05	0.0019768	yes	0.241625	-2.02548	2.02548	0	1	0	OK	0.816553	0.352498	-1.21193	-3.31413	0.0009	0.022329	yes	0.584526	-1.21193	1.21193	0	1	0
12398	ENSMUSG00000041886	ENSMUSG00000041886	Macc1	12:119314269-119469987	metastasis associated in colon cancer 1 [Source:MGI Symbol;Acc:MGI:2685113]	protein_coding	ENSG00000183742	MACC1	NOTEST	0	0	0	0	1	1	no	0	0	0	0	0	0	OK	0.826507	0.262971	-1.65212	-3.38883	0.0009	0.022329	yes	0.544739	-1.65212	1.65212	0	1	0
8314	ENSMUSG00000031373	ENSMUSG00000031373	Car5b	X:163976821-164027997	carbonic anhydrase 5b, mitochondrial [Source:MGI Symbol;Acc:MGI:1926249]	protein_coding	ENSG00000169239	CA5B	OK	0.494344	0.159289	-1.63387	-2.64025	0.00655	0.0982814	no	0.326817	-1.63387	1.63387	0	1	0	OK	0.719374	0.217496	-1.72575	-3.1448	0.00185	0.0383021	yes	0.468435	-1.72575	1.72575	0	1	0
9130	ENSMUSG00000032769	ENSMUSG00000032769	Trpa1	1:14872647-14918862	transient receptor potential cation channel, subfamily A, member 1 [Source:MGI Symbol;Acc:MGI:3522699]	protein_coding	ENSG00000104321	TRPA1	OK	0.739252	1.50011	1.02093	2.64726	0.0035	0.0617265	no	1.11968	1.02093	1.02093	0	1	0	OK	0.671712	0.185321	-1.85782	-3.55957	0.0004	0.0117599	yes	0.428516	-1.85782	1.85782	0	1	0
15325	ENSMUSG00000052565	ENSMUSG00000052565	Hist1h1d	13:23553261-23560686	histone cluster 1, H1d [Source:MGI Symbol;Acc:MGI:107502]	protein_coding	ENSG00000124575	HIST1H1D	OK	0.442531	0.136597	-1.69586	-3.5414	0.0007	0.0183858	yes	0.289564	-1.69586	1.69586	0	1	0	OK	0.717572	0.184879	-1.95655	-4.45754	5e-05	0.0019768	yes	0.451226	-1.95655	1.95655	0	1	0
8708	ENSMUSG00000031997	ENSMUSG00000031997	Trpc6	9:8544141-8740988	transient receptor potential cation channel, subfamily C, member 6 [Source:MGI Symbol;Acc:MGI:109523]	protein_coding	ENSG00000137672	TRPC6	OK	0.535784	0.0565896	-3.24304	-3.13129	0.00395	0.0676947	no	0.296187	-3.24304	3.24304	0	1	0	OK	0.955975	0.17231	-2.47197	-4.28969	0.00035	0.0105257	yes	0.564142	-2.47197	2.47197	0	1	0
12232	ENSMUSG00000041390	ENSMUSG00000041390	Mdfic	6:15720660-15802169	MyoD family inhibitor domain containing [Source:MGI Symbol;Acc:MGI:104611]	protein_coding	ENSG00000135272	MDFIC	OK	1.33329	0.0811161	-4.03886	-2.27767	0.00075	0.0193743	yes	0.707203	-4.03886	4.03886	0	1	0	OK	3.09397	0.110797	-4.80346	-4.2506	5e-05	0.0019768	yes	1.60238	-4.80346	4.80346	1	1	1
10078	ENSMUSG00000035566	ENSMUSG00000035566	Pcdh17	14:84443562-84539002	protocadherin 17 [Source:MGI Symbol;Acc:MGI:2684924]	protein_coding	ENSG00000118946	PCDH17	NOTEST	0	0	0	0	1	1	no	0	0	0	0	0	0	OK	0.419366	0.0396312	-3.4035	-3.82647	5e-05	0.0019768	yes	0.229499	-3.4035	3.4035	0	1	0
3964	ENSMUSG00000022899	ENSMUSG00000022899	Slc15a2	16:36750176-36784962	solute carrier family 15 (H+/peptide transporter), member 2 [Source:MGI Symbol;Acc:MGI:1890457]	protein_coding	ENSG00000163406	SLC15A2	NOTEST	0.11363	0.110722	-0.0373958	0	1	1	no	0.112176	-0.0373958	0.0373958	0	0	0	OK	0.694147	0.0354067	-4.29315	-0.585716	0.00095	0.0233132	yes	0.364777	-4.29315	4.29315	0	1	0
7760	ENSMUSG00000030301	ENSMUSG00000030301	Ccdc91	6:147438361-147632612	coiled-coil domain containing 91 [Source:MGI Symbol;Acc:MGI:1914265]	protein_coding	ENSG00000123106	CCDC91	NOTEST	0.155527	0.0280558	-2.47079	0	1	1	no	0.0917914	-2.47079	2.47079	0	1	0	OK	0.522525	0	-inf	-nan	5e-05	0.0019768	yes	0.261263	-10	10	0	1	0
10725	ENSMUSG00000037455	ENSMUSG00000037455	Slc18b1	10:23796985-23827968	solute carrier family 18, subfamily B, member 1 [Source:MGI Symbol;Acc:MGI:1923556]	protein_coding	ENSG00000146409	SLC18B1	OK	1.15294	0.00663723	-7.44052	-0.163569	0.2625	0.771541	no	0.579789	-7.44052	7.44052	0	1	0	OK	1.61462	0	-inf	-nan	5e-05	0.0019768	yes	0.80731	-10	10	0	1	0
17200	ENSMUSG00000061232	ENSMUSG00000061232	H2-K1	17:33996016-34000347	histocompatibility 2, K1, K region [Source:MGI Symbol;Acc:MGI:95904]	protein_coding	none	NA	OK	2229.75	1477.98	-0.593253	-2.59533	0.00255	0.0488675	yes	1853.87	-0.593253	0.593253	2	0	0	OK	6452.06	6587.29	0.0299232	0.118486	0.887	0.992805	no	6519.68	0.0299232	0.0299232	2	0	0
20698	ENSMUSG00000074129	ENSMUSG00000074129	Rpl13a	7:45125557-45136432	ribosomal protein L13A [Source:MGI Symbol;Acc:MGI:1351455]	protein_coding	NA	NA	OK	12083	10264.9	-0.235259	-0.568318	0.5061	0.944093	no	11174	-0.235259	0.235259	2	0	0	OK	4589.16	6543.41	0.511813	1.25891	0.13555	0.598012	no	5566.28	0.511813	0.511813	2	0	0
17126	ENSMUSG00000060802	ENSMUSG00000060802	B2m	2:122120107-122186189	beta-2 microglobulin [Source:MGI Symbol;Acc:MGI:88127]	protein_coding	ENSG00000166710	B2M	OK	2249.46	1799.42	-0.322052	-1.73115	0.04185	0.328158	no	2024.44	-0.322052	0.322052	2	0	0	OK	5274.72	4193.12	-0.331069	-1.66902	0.0501	0.360943	no	4733.92	-0.331069	0.331069	2	0	0
31236	ENSMUSG00000090733	ENSMUSG00000090733	Rps27	3:90212521-90213651	ribosomal protein S27 [Source:MGI Symbol;Acc:MGI:1888676]	protein_coding	none	NA	OK	4280.5	3780.59	-0.179169	-0.981277	0.2486	0.757154	no	4030.55	-0.179169	0.179169	2	0	0	OK	3247.09	4087.54	0.332087	1.82446	0.03265	0.283523	no	3667.32	0.332087	0.332087	2	0	0
10830	ENSMUSG00000037742	ENSMUSG00000037742	Eef1a1	9:78478448-78489151	eukaryotic translation elongation factor 1 alpha 1 [Source:MGI Symbol;Acc:MGI:1096881]	protein_coding	ENSG00000156508	EEF1A1	OK	7635.18	7663.67	0.00537263	0.0206602	0.97955	0.996066	no	7649.43	0.00537263	0.00537263	2	0	0	OK	3295.54	3977.37	0.271298	1.02166	0.2278	0.731517	no	3636.45	0.271298	0.271298	2	0	0
4608	ENSMUSG00000024661	ENSMUSG00000024661	Fth1	19:9980597-9985098	ferritin heavy polypeptide 1 [Source:MGI Symbol;Acc:MGI:95588]	protein_coding	none	NA	OK	1294.38	1201.7	-0.107183	-0.438926	0.60825	0.973311	no	1248.04	-0.107183	0.107183	2	0	0	OK	4218.23	3869.62	-0.124446	-0.489611	0.56355	0.96363	no	4043.92	-0.124446	0.124446	2	0	0
17949	ENSMUSG00000064370	ENSMUSG00000064370	mt-Cytb	MT:14144-15288	mitochondrially encoded cytochrome b [Source:MGI Symbol;Acc:MGI:102501]	protein_coding	ENSG00000198727	MT-CYB	OK	1704.16	2434.21	0.514393	2.71275	0.00165	0.0349961	yes	2069.18	0.514393	0.514393	2	0	0	OK	4804.7	3705.03	-0.374962	-1.98417	0.0204	0.208426	no	4254.86	-0.374962	0.374962	2	0	0
1186	ENSMUSG00000008683	ENSMUSG00000008683	Rps15a	7:118104371-118116188	ribosomal protein S15A [Source:MGI Symbol;Acc:MGI:2389091]	protein_coding	ENSG00000134419	RPS15A	OK	5116.08	4488.59	-0.188777	-0.744107	0.37365	0.874645	no	4802.34	-0.188777	0.188777	2	0	0	OK	2558.65	3508.57	0.455499	1.74757	0.0376	0.309998	no	3033.61	0.455499	0.455499	2	0	0
17931	ENSMUSG00000064351	ENSMUSG00000064351	mt-Co1	MT:5327-6938	mitochondrially encoded cytochrome c oxidase I [Source:MGI Symbol;Acc:MGI:102504]	protein_coding	ENSG00000198804	MT-CO1	OK	3399.49	3478.83	0.0332838	0.186338	0.82775	0.992781	no	3439.16	0.0332838	0.0332838	2	0	0	OK	4459.63	3432.99	-0.377459	-1.98144	0.0216	0.216607	no	3946.31	-0.377459	0.377459	2	0	0
17921	ENSMUSG00000064341	ENSMUSG00000064341	mt-Nd1	MT:2750-3842	mitochondrially encoded NADH dehydrogenase 1 [Source:MGI Symbol;Acc:MGI:101787]	protein_coding	ENSG00000198888	MT-ND1	OK	4261.98	4699.35	0.140935	0.706262	0.403	0.894854	no	4480.66	0.140935	0.140935	2	0	0	OK	4407.49	3288.39	-0.422575	-2.15065	0.011	0.136007	no	3847.94	-0.422575	0.422575	2	0	0
7388	ENSMUSG00000029580	ENSMUSG00000029580	Actb	5:142903114-142906754	actin, beta [Source:MGI Symbol;Acc:MGI:87904]	protein_coding	ENSG00000075624	ACTB	OK	4129.08	4928.55	0.255345	0.423827	0.60985	0.973311	no	4528.82	0.255345	0.255345	2	0	0	OK	3091.79	2924.54	-0.0802363	-0.144343	0.8659	0.992781	no	3008.16	-0.0802363	0.0802363	2	0	0
16973	ENSMUSG00000060126	ENSMUSG00000060126	Tpt1	14:75845092-75848525	tumor protein, translationally-controlled 1 [Source:MGI Symbol;Acc:MGI:104890]	protein_coding	none	NA	OK	2868.73	2461.94	-0.220614	-1.16227	0.1753	0.656354	no	2665.34	-0.220614	0.220614	2	0	0	OK	2545.72	2867.27	0.171605	0.90407	0.2957	0.806907	no	2706.49	0.171605	0.171605	2	0	0
20426	ENSMUSG00000073411	ENSMUSG00000073411	H2-D1	17:35262729-35267499	histocompatibility 2, D region locus 1 [Source:MGI Symbol;Acc:MGI:95896]	protein_coding	none	NA	OK	858.348	721.92	-0.249724	-0.825303	0.3097	0.819697	no	790.134	-0.249724	0.249724	2	0	0	OK	2785.74	2716.29	-0.0364224	-0.105442	0.89945	0.992805	no	2751.01	-0.0364224	0.0364224	2	0	0
1138	ENSMUSG00000007892	ENSMUSG00000007892	Rplp1	9:61913283-61914542	ribosomal protein, large, P1 [Source:MGI Symbol;Acc:MGI:1927099]	protein_coding	NA	NA	OK	4403.78	4095.16	-0.104822	-0.566279	0.50295	0.942987	no	4249.47	-0.104822	0.104822	2	0	0	OK	1909.84	2433.9	0.34982	1.92462	0.0263	0.245946	no	2171.87	0.34982	0.34982	2	0	0
1832	ENSMUSG00000017707	ENSMUSG00000017707	Serinc3	2:163623271-163645801	serine incorporator 3 [Source:MGI Symbol;Acc:MGI:1349457]	protein_coding	ENSG00000132824	SERINC3	OK	649.943	799.477	0.298744	1.37807	0.08335	0.47862	no	724.71	0.298744	0.298744	2	0	0	OK	2743.32	2400.48	-0.192604	-1.19005	0.1312	0.592685	no	2571.9	-0.192604	0.192604	2	0	0
3780	ENSMUSG00000022587	ENSMUSG00000022587	Ly6e	15:74955050-74959905	lymphocyte antigen 6 complex, locus E [Source:MGI Symbol;Acc:MGI:106651]	protein_coding	ENSG00000160932	LY6E	OK	1029.34	1292.52	0.328479	1.69322	0.0468	0.348333	no	1160.93	0.328479	0.328479	2	0	0	OK	2329.85	2381.64	0.0317147	0.154511	0.85595	0.992781	no	2355.74	0.0317147	0.0317147	2	0	0
17358	ENSMUSG00000061983	ENSMUSG00000061983	Rps12	10:23785182-23787275	ribosomal protein S12 [Source:MGI Symbol;Acc:MGI:98105]	protein_coding	none	NA	OK	5078.35	4690.72	-0.114551	-0.604281	0.48205	0.935071	no	4884.53	-0.114551	0.114551	2	0	0	OK	1640.34	2024.09	0.303278	1.6372	0.05405	0.375865	no	1832.21	0.303278	0.303278	2	0	0
16726	ENSMUSG00000059070	ENSMUSG00000059070	Rpl18	7:45705087-45720836	ribosomal protein L18 [Source:MGI Symbol;Acc:MGI:98003]	protein_coding	none	NA	OK	3831.88	3515.39	-0.124369	-0.574205	0.5011	0.942557	no	3673.64	-0.124369	0.124369	2	0	0	OK	1389.73	1945.78	0.485544	2.00232	0.01865	0.195903	no	1667.76	0.485544	0.485544	2	0	0
980	ENSMUSG00000006333	ENSMUSG00000006333	Rps9	7:3703992-3706897	ribosomal protein S9 [Source:MGI Symbol;Acc:MGI:1924096]	protein_coding	ENSG00000170889	RPS9	OK	2466.02	2153.95	-0.195199	-1.00445	0.23045	0.734716	no	2309.98	-0.195199	0.195199	2	0	0	OK	1479.35	1943.64	0.393802	2.03745	0.01675	0.182257	no	1711.49	0.393802	0.393802	2	0	0
11969	ENSMUSG00000040592	ENSMUSG00000040592	Cd79b	11:106311340-106314762	CD79B antigen [Source:MGI Symbol;Acc:MGI:96431]	protein_coding	ENSG00000007312	CD79B	OK	286.569	399.095	0.47785	2.62286	0.00205	0.0413208	yes	342.832	0.47785	0.47785	2	0	0	OK	1736.62	1911.94	0.138756	0.730496	0.3849	0.881982	no	1824.28	0.138756	0.138756	2	0	0
4975	ENSMUSG00000025290	ENSMUSG00000025290	Rps24	14:24487124-24496959	ribosomal protein S24 [Source:MGI Symbol;Acc:MGI:98147]	protein_coding	none	NA	OK	2832.41	2430.45	-0.220806	-1.03748	0.22255	0.725519	no	2631.43	-0.220806	0.220806	2	0	0	OK	1728.11	1868	0.1123	0.537189	0.5319	0.953233	no	1798.05	0.1123	0.1123	2	0	0
14860	ENSMUSG00000050708	ENSMUSG00000050708	Ftl1	7:45457943-45460300	ferritin light polypeptide 1 [Source:MGI Symbol;Acc:MGI:95589]	protein_coding	NA	NA	OK	854.601	689.549	-0.309597	-1.53387	0.07195	0.443588	no	772.075	-0.309597	0.309597	2	0	0	OK	1701.56	1850.4	0.120983	0.595535	0.47685	0.933549	no	1775.98	0.120983	0.120983	2	0	0
4586	ENSMUSG00000024608	ENSMUSG00000024608	Rps14	18:60684493-60778546	ribosomal protein S14 [Source:MGI Symbol;Acc:MGI:98107]	protein_coding	ENSG00000164587	RPS14	OK	3884.05	3493.3	-0.15297	-0.789765	0.35465	0.858556	no	3688.68	-0.15297	0.15297	2	0	0	OK	1380.85	1842.56	0.416153	2.11222	0.01415	0.162061	no	1611.7	0.416153	0.416153	2	0	0
4446	ENSMUSG00000024353	ENSMUSG00000024353	Mzb1	18:35647266-35662186	marginal zone B and B1 cell-specific protein 1 [Source:MGI Symbol;Acc:MGI:1917066]	protein_coding	ENSG00000170476	MZB1	OK	1237.19	1396.77	0.175019	0.617327	0.4656	0.929944	no	1316.98	0.175019	0.175019	2	0	0	OK	1905.64	1834.66	-0.0547651	-0.186521	0.82315	0.992781	no	1870.15	-0.0547651	0.0547651	2	0	0
17925	ENSMUSG00000064345	ENSMUSG00000064345	mt-Nd2	MT:3913-5016	mitochondrially encoded NADH dehydrogenase 2 [Source:MGI Symbol;Acc:MGI:102500]	protein_coding	ENSG00000198763	MT-ND2	OK	1617.61	1856.93	0.199055	1.06564	0.2096	0.708945	no	1737.27	0.199055	0.199055	2	0	0	OK	2042.79	1822.17	-0.164884	-0.878126	0.2996	0.80954	no	1932.48	-0.164884	0.164884	2	0	0
2473	ENSMUSG00000020372	ENSMUSG00000020372	Rack1	11:48800331-48817353	receptor for activated C kinase 1 [Source:MGI Symbol;Acc:MGI:101849]	protein_coding	ENSG00000204628	RACK1	OK	3858.13	3276.26	-0.235856	-0.974588	0.2392	0.746209	no	3567.2	-0.235856	0.235856	2	0	0	OK	1482.45	1808.81	0.287063	1.1485	0.16575	0.641202	no	1645.63	0.287063	0.287063	2	0	0
14621	ENSMUSG00000049775	ENSMUSG00000049775	Tmsb4x	X:167207092-167209315	thymosin, beta 4, X chromosome [Source:MGI Symbol;Acc:MGI:99510]	protein_coding	ENSG00000154620	TMSB4Y	OK	4054.35	4197.74	0.050145	0.26135	0.76345	0.99264	no	4126.05	0.050145	0.050145	2	0	0	OK	1885.64	1688.46	-0.159345	-0.860543	0.3049	0.815022	no	1787.05	-0.159345	0.159345	2	0	0
574	ENSMUSG00000003379	ENSMUSG00000003379	Cd79a	7:24897380-24902197	CD79A antigen (immunoglobulin-associated alpha) [Source:MGI Symbol;Acc:MGI:101774]	protein_coding	ENSG00000105369	CD79A	OK	574.508	670.406	0.222707	1.22076	0.15795	0.626756	no	622.457	0.222707	0.222707	2	0	0	OK	1687.17	1629.64	-0.0500472	-0.262299	0.76185	0.99264	no	1658.41	-0.0500472	0.0500472	2	0	0
6770	ENSMUSG00000028581	ENSMUSG00000028581	Laptm5	4:130913124-130936141	lysosomal-associated protein transmembrane 5 [Source:MGI Symbol;Acc:MGI:108046]	protein_coding	ENSG00000162511	LAPTM5	OK	347.097	442.84	0.351446	1.3394	0.066	0.423424	no	394.968	0.351446	0.351446	2	0	0	OK	1688.32	1538.99	-0.133608	-0.496767	0.5015	0.942901	no	1613.65	-0.133608	0.133608	2	0	0
20153	ENSMUSG00000071866	ENSMUSG00000071866	Ppia	11:6415442-6419817	peptidylprolyl isomerase A [Source:MGI Symbol;Acc:MGI:97749]	protein_coding	NA	NA	OK	2680.93	3062.39	0.191924	0.872593	0.3068	0.816965	no	2871.66	0.191924	0.191924	2	0	0	OK	1333.68	1467.73	0.138173	0.627928	0.45765	0.926733	no	1400.7	0.138173	0.138173	2	0	0
8743	ENSMUSG00000032053	ENSMUSG00000032053	Pou2af1	9:51213707-51240080	POU domain, class 2, associating factor 1 [Source:MGI Symbol;Acc:MGI:105086]	protein_coding	ENSG00000110777	POU2AF1	OK	433.074	456.172	0.074964	0.382593	0.65215	0.978501	no	444.623	0.074964	0.074964	2	0	0	OK	1597.65	1417.04	-0.173066	-0.832435	0.32765	0.836214	no	1507.35	-0.173066	0.173066	2	0	0
12935	ENSMUSG00000043716	ENSMUSG00000043716	Rpl7	1:16101294-16104662	ribosomal protein L7 [Source:MGI Symbol;Acc:MGI:98073]	protein_coding	none	NA	OK	1906.76	1745.13	-0.12779	-0.622785	0.46415	0.929751	no	1825.95	-0.12779	0.12779	2	0	0	OK	1192.41	1407.77	0.239534	1.18433	0.1654	0.640682	no	1300.09	0.239534	0.239534	2	0	0
14055	ENSMUSG00000047675	ENSMUSG00000047675	Rps8	4:117153826-117156243	ribosomal protein S8 [Source:MGI Symbol;Acc:MGI:98166]	protein_coding	ENSG00000142937	RPS8	OK	3838.32	3225.83	-0.250806	-1.06771	0.20895	0.707978	no	3532.07	-0.250806	0.250806	2	0	0	OK	1196.96	1375.88	0.200978	0.868873	0.3019	0.811385	no	1286.42	0.200978	0.200978	2	0	0
5088	ENSMUSG00000025508	ENSMUSG00000025508	Rplp2	7:141447369-141451585	ribosomal protein, large P2 [Source:MGI Symbol;Acc:MGI:1914436]	protein_coding	ENSG00000177600	RPLP2	OK	3755.36	3318.66	-0.178352	-0.964926	0.2571	0.765399	no	3537.01	-0.178352	0.178352	2	0	0	OK	1104.8	1373.31	0.313869	1.70359	0.0444	0.337976	no	1239.05	0.313869	0.313869	2	0	0
9883	ENSMUSG00000034994	ENSMUSG00000034994	Eef2	10:81176630-81182498	eukaryotic translation elongation factor 2 [Source:MGI Symbol;Acc:MGI:95288]	protein_coding	ENSG00000167658	EEF2	OK	1919.15	1831.11	-0.0677497	-0.305282	0.707	0.986949	no	1875.13	-0.0677497	0.0677497	2	0	0	OK	1105.85	1310.71	0.245192	1.08503	0.16285	0.636795	no	1208.28	0.245192	0.245192	2	0	0
653	ENSMUSG00000003970	ENSMUSG00000003970	Rpl8	15:76904077-76906314	ribosomal protein L8 [Source:MGI Symbol;Acc:MGI:1350927]	protein_coding	ENSG00000161016	RPL8	OK	2842.01	2558.31	-0.151717	-0.804748	0.3401	0.847254	no	2700.16	-0.151717	0.151717	2	0	0	OK	957.519	1306.03	0.44781	2.44253	0.0045	0.0740826	no	1131.77	0.44781	0.44781	2	0	0
6107	ENSMUSG00000027423	ENSMUSG00000027423	Snx5	2:144250122-144281227	sorting nexin 5 [Source:MGI Symbol;Acc:MGI:1916428]	protein_coding	ENSG00000089006	SNX5	OK	601.815	576.577	-0.0618069	-0.172649	0.8343	0.992781	no	589.196	-0.0618069	0.0618069	2	0	0	OK	1259.79	1299.9	0.0452216	0.124908	0.8793	0.992781	no	1279.85	0.0452216	0.0452216	2	0	0
16776	ENSMUSG00000059291	ENSMUSG00000059291	Rpl11	4:136028264-136053428	ribosomal protein L11 [Source:MGI Symbol;Acc:MGI:1914275]	protein_coding	ENSG00000142676	RPL11	OK	2989.18	2776.62	-0.106419	-0.476308	0.5773	0.967506	no	2882.9	-0.106419	0.106419	2	0	0	OK	1032.9	1272.11	0.300518	1.36057	0.10725	0.543895	no	1152.51	0.300518	0.300518	2	0	0
7998	ENSMUSG00000030744	ENSMUSG00000030744	Rps3	7:99477895-99483738	ribosomal protein S3 [Source:MGI Symbol;Acc:MGI:1350917]	protein_coding	ENSG00000149273	RPS3	OK	2562.12	2200.17	-0.219725	-0.848804	0.31685	0.826638	no	2381.14	-0.219725	0.219725	2	0	0	OK	1002.47	1240.95	0.307882	1.24307	0.14095	0.601357	no	1121.71	0.307882	0.307882	2	0	0
1658	ENSMUSG00000015837	ENSMUSG00000015837	Sqstm1	11:50174443-50210827	sequestosome 1 [Source:MGI Symbol;Acc:MGI:107931]	protein_coding	ENSG00000161011	SQSTM1	OK	177.372	158.964	-0.158076	-0.606502	0.4769	0.933549	no	168.168	-0.158076	0.158076	2	0	0	OK	1030.37	1238.29	0.265193	1.01474	0.22355	0.726721	no	1134.33	0.265193	0.265193	2	0	0
17314	ENSMUSG00000061787	ENSMUSG00000061787	Rps17	7:81342731-81345254	ribosomal protein S17 [Source:MGI Symbol;Acc:MGI:1309526]	protein_coding	ENSG00000182774	RPS17	OK	2466.99	2219.41	-0.152575	-0.835367	0.32545	0.833957	no	2343.2	-0.152575	0.152575	2	0	0	OK	926.78	1201.26	0.374253	2.02128	0.01765	0.188773	no	1064.02	0.374253	0.374253	2	0	0
11361	ENSMUSG00000039001	ENSMUSG00000039001	Rps21	2:180257376-180258445	ribosomal protein S21 [Source:MGI Symbol;Acc:MGI:1913731]	protein_coding	ENSG00000171858	RPS21	OK	3427.08	2951.96	-0.215309	-1.17944	0.16645	0.642324	no	3189.52	-0.215309	0.215309	2	0	0	OK	955.582	1176	0.299439	1.61488	0.05575	0.383106	no	1065.79	0.299439	0.299439	2	0	0
5795	ENSMUSG00000026842	ENSMUSG00000026842	Abl1	2:31670714-31804227	c-abl oncogene 1, non-receptor tyrosine kinase [Source:MGI Symbol;Acc:MGI:87859]	protein_coding	ENSG00000097007	ABL1	OK	1307.15	1535.85	0.232617	0.552214	0.505	0.943632	no	1421.5	0.232617	0.232617	2	0	0	OK	945.052	1137.62	0.267557	0.659091	0.43675	0.914374	no	1041.34	0.267557	0.267557	2	0	0
6074	ENSMUSG00000027367	ENSMUSG00000027367	Stard7	2:127270217-127298932	START domain containing 7 [Source:MGI Symbol;Acc:MGI:2139090]	protein_coding	ENSG00000084090	STARD7	OK	200.387	284.959	0.507967	1.55659	0.06335	0.414675	no	242.673	0.507967	0.507967	2	0	0	OK	1145.88	1130.63	-0.0193327	-0.0593746	0.9449	0.994117	no	1138.26	-0.0193327	0.0193327	2	0	0
17946	ENSMUSG00000064367	ENSMUSG00000064367	mt-Nd5	MT:11741-14070	mitochondrially encoded NADH dehydrogenase 5 [Source:MGI Symbol;Acc:MGI:102496]	protein_coding	ENSG00000198786	MT-ND5	OK	709.249	885.377	0.319999	1.68606	0.04765	0.351782	no	797.313	0.319999	0.319999	2	0	0	OK	1552.65	1125.56	-0.464088	-2.38492	0.00535	0.0845717	no	1339.11	-0.464088	0.464088	2	0	0
13926	ENSMUSG00000047215	ENSMUSG00000047215	Rpl9	5:65388363-65391444	ribosomal protein L9 [Source:MGI Symbol;Acc:MGI:1298373]	protein_coding	none	NA	OK	1884.6	1649.27	-0.192432	-1.03218	0.2262	0.729196	no	1766.93	-0.192432	0.192432	2	0	0	OK	922.178	1115.23	0.274223	1.48897	0.07755	0.460113	no	1018.7	0.274223	0.274223	2	0	0
20036	ENSMUSG00000071415	ENSMUSG00000071415	Rpl23	11:97777526-97782437	ribosomal protein L23 [Source:MGI Symbol;Acc:MGI:1929455]	protein_coding	ENSG00000125691	RPL23	OK	1886.86	1637.86	-0.204175	-1.07164	0.1977	0.691414	no	1762.36	-0.204175	0.204175	2	0	0	OK	869.178	1111.99	0.355426	1.87037	0.028	0.256196	no	990.584	0.355426	0.355426	2	0	0
4722	ENSMUSG00000024858	ENSMUSG00000024858	Grk2	19:4286000-4306222	G protein-coupled receptor kinase 2 [Source:MGI Symbol;Acc:MGI:87940]	protein_coding	ENSG00000173020	GRK2	OK	579.502	626.68	0.112915	0.200161	0.81155	0.992781	no	603.091	0.112915	0.112915	2	0	0	OK	1198.29	1063.82	-0.171727	-0.310767	0.7024	0.986511	no	1131.05	-0.171727	0.171727	2	0	0
20516	ENSMUSG00000073702	ENSMUSG00000073702	Rpl31	1:39367841-39478755	ribosomal protein L31 [Source:MGI Symbol;Acc:MGI:2149632]	protein_coding	none	NA	OK	1691.86	1468.18	-0.204577	-1.10178	0.19595	0.689135	no	1580.02	-0.204577	0.204577	2	0	0	OK	759.89	1059.53	0.479564	2.55902	0.00355	0.0624521	no	909.71	0.479564	0.479564	2	0	0
1131	ENSMUSG00000007850	ENSMUSG00000007850	Hnrnph1	11:50376989-50386528	heterogeneous nuclear ribonucleoprotein H1 [Source:MGI Symbol;Acc:MGI:1891925]	protein_coding	ENSG00000169045	HNRNPH1	OK	908.767	957.554	0.0754443	0.088617	0.8711	0.992781	no	933.16	0.0754443	0.0754443	2	0	0	OK	1235.15	1059.51	-0.221288	-0.253055	0.62885	0.975532	no	1147.33	-0.221288	0.221288	2	0	0
8943	ENSMUSG00000032399	ENSMUSG00000032399	Rpl4	9:64173374-64178666	ribosomal protein L4 [Source:MGI Symbol;Acc:MGI:1915141]	protein_coding	ENSG00000174444	RPL4	OK	2526.17	2291.19	-0.140857	-0.686485	0.41655	0.903569	no	2408.68	-0.140857	0.140857	2	0	0	OK	781.363	1058.93	0.438548	2.32087	0.00655	0.0982814	no	920.147	0.438548	0.438548	2	0	0
16593	ENSMUSG00000058470	ENSMUSG00000058470	Gm8369	19:11485937-11512577	predicted gene 8369 [Source:MGI Symbol;Acc:MGI:3645380]	protein_coding	none	NA	OK	20.1553	14.635	-0.461732	-1.37549	0.1058	0.540085	no	17.3952	-0.461732	0.461732	2	0	0	OK	1078.5	1047.73	-0.0417669	-0.223046	0.7921	0.992781	no	1063.12	-0.0417669	0.0417669	2	0	0
10508	ENSMUSG00000036908	ENSMUSG00000036908	Unc93b1	19:3935185-3949340	unc-93 homolog B1, TLR signaling regulator [Source:MGI Symbol;Acc:MGI:1859307]	protein_coding	ENSG00000110057	UNC93B1	OK	116.244	118.699	0.0301591	0.113936	0.8786	0.992781	no	117.471	0.0301591	0.0301591	2	0	0	OK	1010.87	1046.49	0.049965	0.17288	0.8299	0.992781	no	1028.68	0.049965	0.049965	2	0	0
17451	ENSMUSG00000062328	ENSMUSG00000062328	Rpl17	18:74998557-75003381	ribosomal protein L17 [Source:MGI Symbol;Acc:MGI:2448270]	protein_coding	none	NA	OK	1672.31	1317.16	-0.344415	-1.8666	0.0281	0.257028	no	1494.74	-0.344415	0.344415	2	0	0	OK	830.366	1024.23	0.302725	1.66421	0.05005	0.360813	no	927.298	0.302725	0.302725	2	0	0
6568	ENSMUSG00000028234	ENSMUSG00000028234	Rps20	4:3831333-3835665	ribosomal protein S20 [Source:MGI Symbol;Acc:MGI:1914677]	protein_coding	none	NA	OK	2217.74	1874.25	-0.242775	-1.23108	0.14465	0.604777	no	2045.99	-0.242775	0.242775	2	0	0	OK	846.604	1020.43	0.269417	1.38509	0.1044	0.536727	no	933.517	0.269417	0.269417	2	0	0
1184	ENSMUSG00000008668	ENSMUSG00000008668	Rps18	17:33951998-33967035	ribosomal protein S18 [Source:MGI Symbol;Acc:MGI:98146]	protein_coding	ENSG00000231500	RPS18	OK	2915.85	2622.7	-0.152863	-0.790954	0.35365	0.858377	no	2769.27	-0.152863	0.152863	2	0	0	OK	706.186	1014.83	0.523113	2.41881	0.0047	0.0764604	no	860.508	0.523113	0.523113	2	0	0
8283	ENSMUSG00000031320	ENSMUSG00000031320	Rps4x	X:102184940-102189394	ribosomal protein S4, X-linked [Source:MGI Symbol;Acc:MGI:98158]	protein_coding	ENSG00000198034	RPS4X	OK	2075.82	1855.47	-0.161892	-0.863863	0.3147	0.824285	no	1965.64	-0.161892	0.161892	2	0	0	OK	833.318	996.212	0.257585	1.41014	0.10055	0.527264	no	914.765	0.257585	0.257585	2	0	0
1738	ENSMUSG00000016559	ENSMUSG00000016559	H3f3b	11:116021911-116027962	H3 histone, family 3B [Source:MGI Symbol;Acc:MGI:1101768]	protein_coding	NA	NA	OK	549.162	552.874	0.00971678	0.0465989	0.95555	0.994937	no	551.018	0.00971678	0.00971678	2	0	0	OK	993.481	987.784	-0.00829774	-0.0395396	0.96225	0.995028	no	990.632	-0.00829774	0.00829774	2	0	0
17942	ENSMUSG00000064363	ENSMUSG00000064363	mt-Nd4	MT:9876-11544	mitochondrially encoded NADH dehydrogenase 4 [Source:MGI Symbol;Acc:MGI:102498]	protein_coding	ENSG00000198886	MT-ND4	OK	595.937	738.089	0.308635	1.68723	0.0476	0.351643	no	667.013	0.308635	0.308635	2	0	0	OK	1242.76	955.01	-0.379959	-2.03862	0.016	0.176998	no	1098.88	-0.379959	0.379959	2	0	0
16304	ENSMUSG00000057113	ENSMUSG00000057113	Npm1	11:33152286-33163206	nucleophosmin 1 [Source:MGI Symbol;Acc:MGI:106184]	protein_coding	none	NA	OK	2369.32	2473.88	0.0623045	0.26945	0.7547	0.99264	no	2421.6	0.0623045	0.0623045	2	0	0	OK	785.078	954.584	0.282036	1.28103	0.12605	0.583291	no	869.831	0.282036	0.282036	2	0	0
789	ENSMUSG00000004980	ENSMUSG00000004980	Hnrnpa2b1	6:51460931-51469894	heterogeneous nuclear ribonucleoprotein A2/B1 [Source:MGI Symbol;Acc:MGI:104819]	protein_coding	ENSG00000122566	HNRNPA2B1	OK	1652.1	1983.83	0.263987	1.11506	0.1821	0.667168	no	1817.96	0.263987	0.263987	2	0	0	OK	1063.69	950.598	-0.162167	-0.711261	0.3975	0.891525	no	1007.14	-0.162167	0.162167	2	0	0
7983	ENSMUSG00000030724	ENSMUSG00000030724	Cd19	7:126408449-126414889	CD19 antigen [Source:MGI Symbol;Acc:MGI:88319]	protein_coding	ENSG00000177455	CD19	OK	342.603	445.061	0.377464	0.859781	0.2817	0.792943	no	393.832	0.377464	0.377464	2	0	0	OK	926.599	927.478	0.00136663	0.00326902	0.9971	0.999012	no	927.038	0.00136663	0.00136663	2	0	0
1281	ENSMUSG00000009927	ENSMUSG00000009927	Rps25	9:44403697-44418569	ribosomal protein S25 [Source:MGI Symbol;Acc:MGI:1922867]	protein_coding	none	NA	OK	2310.05	2052.29	-0.170689	-0.826176	0.3354	0.843704	no	2181.17	-0.170689	0.170689	2	0	0	OK	706.129	903.079	0.354921	1.49586	0.07945	0.466578	no	804.604	0.354921	0.354921	2	0	0
7833	ENSMUSG00000030432	ENSMUSG00000030432	Rpl28	7:4792873-4812590	ribosomal protein L28 [Source:MGI Symbol;Acc:MGI:101839]	protein_coding	none	NA	OK	2910.19	2499.3	-0.219586	-0.842116	0.3254	0.833943	no	2704.74	-0.219586	0.219586	2	0	0	OK	705.791	902.492	0.354673	1.37233	0.10415	0.536272	no	804.141	0.354673	0.354673	2	0	0
12109	ENSMUSG00000040952	ENSMUSG00000040952	Rps19	7:24884370-24889806	ribosomal protein S19 [Source:MGI Symbol;Acc:MGI:1333780]	protein_coding	none	NA	OK	1770.31	1595.98	-0.149556	-0.76357	0.379	0.877408	no	1683.14	-0.149556	0.149556	2	0	0	OK	759.095	900.157	0.245896	1.24277	0.14635	0.606966	no	829.626	0.245896	0.245896	2	0	0
12666	ENSMUSG00000042675	ENSMUSG00000042675	Ypel3	7:126776954-126780514	yippee like 3 [Source:MGI Symbol;Acc:MGI:1913340]	protein_coding	ENSG00000090238	YPEL3	OK	213.45	161.509	-0.402287	-0.506339	0.5471	0.957956	no	187.479	-0.402287	0.402287	2	0	0	OK	988.079	890.299	-0.150336	-0.222353	0.7891	0.992781	no	939.189	-0.150336	0.150336	2	0	0
8554	ENSMUSG00000031770	ENSMUSG00000031770	Herpud1	8:94377871-94395377	homocysteine-inducible, endoplasmic reticulum stress-inducible, ubiquitin-like domain member 1 [Source:MGI Symbol;Acc:MGI:1927406]	protein_coding	ENSG00000051108	HERPUD1	OK	101.615	90.09	-0.173678	-0.765606	0.36455	0.867557	no	95.8525	-0.173678	0.173678	2	0	0	OK	950.104	868.346	-0.129815	-0.578741	0.4958	0.940774	no	909.225	-0.129815	0.129815	2	0	0
6172	ENSMUSG00000027523	ENSMUSG00000027523	Gnas	2:174281236-174346744	GNAS (guanine nucleotide binding protein, alpha stimulating) complex locus [Source:MGI Symbol;Acc:MGI:95777]	protein_coding	ENSG00000087460	GNAS	OK	928.075	976.399	0.0732297	0.309043	0.70435	0.986807	no	952.237	0.0732297	0.0732297	2	0	0	OK	793.557	866.154	0.12629	0.533092	0.52965	0.951913	no	829.856	0.12629	0.12629	2	0	0
11093	ENSMUSG00000038352	ENSMUSG00000038352	Arl5c	11:97989577-97996181	ADP-ribosylation factor-like 5C [Source:MGI Symbol;Acc:MGI:3028577]	protein_coding	ENSG00000141748	ARL5C	OK	116.296	162.408	0.481818	2.5381	0.00255	0.0488675	yes	139.352	0.481818	0.481818	2	0	0	OK	892.335	856.041	-0.0599057	-0.312937	0.70675	0.986938	no	874.188	-0.0599057	0.0599057	2	0	0
869	ENSMUSG00000005610	ENSMUSG00000005610	Eif4g2	7:111067749-111083030	eukaryotic translation initiation factor 4, gamma 2 [Source:MGI Symbol;Acc:MGI:109207]	protein_coding	ENSG00000110321	EIF4G2	OK	693.899	920.451	0.407614	1.05639	0.2181	0.719234	no	807.175	0.407614	0.407614	2	0	0	OK	1027.64	854.461	-0.266244	-0.67372	0.43795	0.915169	no	941.051	-0.266244	0.266244	2	0	0
19156	ENSMUSG00000067274	ENSMUSG00000067274	Rplp0	5:115559466-115563727	ribosomal protein, large, P0 [Source:MGI Symbol;Acc:MGI:1927636]	protein_coding	none	NA	OK	1920.09	1904.7	-0.0116082	-0.0585394	0.9441	0.994117	no	1912.39	-0.0116082	0.0116082	2	0	0	OK	657.004	852.292	0.375447	1.9693	0.0201	0.206332	no	754.648	0.375447	0.375447	2	0	0
3155	ENSMUSG00000021546	ENSMUSG00000021546	Hnrnpk	13:58391141-58411148	heterogeneous nuclear ribonucleoprotein K [Source:MGI Symbol;Acc:MGI:99894]	protein_coding	ENSG00000165119	HNRNPK	FAIL	768.452	1054.28	0	0	1	1	no	911.366	0	0	2	0	0	OK	854.831	833.968	-0.0356467	-0.132964	0.8721	0.992781	no	844.399	-0.0356467	0.0356467	2	0	0
17248	ENSMUSG00000061477	ENSMUSG00000061477	Rps7	12:28630853-28635953	ribosomal protein S7 [Source:MGI Symbol;Acc:MGI:1333818]	protein_coding	ENSG00000171863	RPS7	OK	1309.83	1086.99	-0.269036	-1.20867	0.15565	0.622337	no	1198.41	-0.269036	0.269036	2	0	0	OK	706.102	829.888	0.233039	1.03275	0.22615	0.729196	no	767.995	0.233039	0.233039	2	0	0
31291	ENSMUSG00000090862	ENSMUSG00000090862	Rps13	7:116331504-116334195	ribosomal protein S13 [Source:MGI Symbol;Acc:MGI:1915302]	protein_coding	ENSG00000110700	RPS13	OK	1750.9	1482.33	-0.240225	-1.29354	0.12885	0.588573	no	1616.62	-0.240225	0.240225	2	0	0	OK	708.867	821.313	0.212418	1.10533	0.1937	0.685796	no	765.09	0.212418	0.212418	2	0	0
13904	ENSMUSG00000047139	ENSMUSG00000047139	Cd24a	10:43578283-43584265	CD24a antigen [Source:MGI Symbol;Acc:MGI:88323]	protein_coding	none	NA	OK	445.858	721.216	0.693847	3.77485	5e-05	0.0019768	yes	583.537	0.693847	0.693847	2	0	0	OK	1067.8	817.592	-0.385195	-2.03513	0.01745	0.186988	no	942.696	-0.385195	0.385195	2	0	0
6986	ENSMUSG00000028936	ENSMUSG00000028936	Rpl22	4:152325741-152334071	ribosomal protein L22 [Source:MGI Symbol;Acc:MGI:99262]	protein_coding	ENSG00000116251	RPL22	OK	1885.69	1639.06	-0.202224	-1.05743	0.2145	0.715355	no	1762.38	-0.202224	0.202224	2	0	0	OK	705.039	809.848	0.199948	1.01313	0.23455	0.739554	no	757.443	0.199948	0.199948	2	0	0
306	ENSMUSG00000001750	ENSMUSG00000001750	Tcirg1	19:3896049-3907133	T cell, immune regulator 1, ATPase, H+ transporting, lysosomal V0 protein A3 [Source:MGI Symbol;Acc:MGI:1350931]	protein_coding	ENSG00000110719	TCIRG1	OK	127.871	154.933	0.276948	0.948343	0.2623	0.771194	no	141.402	0.276948	0.276948	2	0	0	OK	901.854	804.643	-0.164545	-0.542903	0.5232	0.950348	no	853.249	-0.164545	0.164545	2	0	0
4532	ENSMUSG00000024516	ENSMUSG00000024516	Sec11c	18:65800514-65817684	SEC11 homolog C, signal peptidase complex subunit [Source:MGI Symbol;Acc:MGI:1913536]	protein_coding	ENSG00000166562	SEC11C	OK	419.067	425.226	0.0210493	0.0924088	0.9147	0.992873	no	422.147	0.0210493	0.0210493	2	0	0	OK	790.759	791.34	0.00106067	0.00423047	0.9962	0.998903	no	791.05	0.00106067	0.00106067	2	0	0
9411	ENSMUSG00000033685	ENSMUSG00000033685	Ucp2	7:100493336-100514960	uncoupling protein 2 (mitochondrial, proton carrier) [Source:MGI Symbol;Acc:MGI:109354]	protein_coding	ENSG00000175567	UCP2	OK	1747.32	1455.63	-0.263502	-1.05555	0.20765	0.70616	no	1601.47	-0.263502	0.263502	2	0	0	OK	904.385	788.036	-0.198676	-0.800291	0.3436	0.851162	no	846.21	-0.198676	0.198676	2	0	0
1999	ENSMUSG00000018819	ENSMUSG00000018819	Lsp1	7:142460808-142516009	lymphocyte specific 1 [Source:MGI Symbol;Acc:MGI:96832]	protein_coding	ENSG00000130592	LSP1	OK	170.531	272.781	0.677712	2.61234	0.0022	0.0437041	yes	221.656	0.677712	0.677712	2	0	0	OK	585.234	781.374	0.417001	1.47655	0.0793	0.466328	no	683.304	0.417001	0.417001	2	0	0
16106	ENSMUSG00000056201	ENSMUSG00000056201	Cfl1	19:5490454-5510538	cofilin 1, non-muscle [Source:MGI Symbol;Acc:MGI:101757]	protein_coding	ENSG00000172757	CFL1	OK	1088.56	1343.55	0.303625	1.62068	0.05595	0.3842	no	1216.05	0.303625	0.303625	2	0	0	OK	705.73	780.707	0.145664	0.767012	0.36025	0.863602	no	743.218	0.145664	0.145664	2	0	0
9977	ENSMUSG00000035268	ENSMUSG00000035268	Pkig	2:163658385-163726158	protein kinase inhibitor, gamma [Source:MGI Symbol;Acc:MGI:1343086]	protein_coding	ENSG00000168734	PKIG	OK	231.35	272.31	0.235176	1.10925	0.1918	0.682797	no	251.83	0.235176	0.235176	2	0	0	OK	801.575	780.431	-0.0385663	-0.169347	0.83955	0.992781	no	791.003	-0.0385663	0.0385663	2	0	0
5624	ENSMUSG00000026576	ENSMUSG00000026576	Atp1b1	1:164289799-164458355	ATPase, Na+/K+ transporting, beta 1 polypeptide [Source:MGI Symbol;Acc:MGI:88108]	protein_coding	ENSG00000143153	ATP1B1	OK	219.424	232.782	0.0852624	0.330618	0.66645	0.980559	no	226.103	0.0852624	0.0852624	2	0	0	OK	912.485	779.469	-0.227309	-0.73759	0.3636	0.866649	no	845.977	-0.227309	0.227309	2	0	0
680	ENSMUSG00000004207	ENSMUSG00000004207	Psap	10:60277626-60302597	prosaposin [Source:MGI Symbol;Acc:MGI:97783]	protein_coding	ENSG00000197746	PSAP	OK	225.51	299.903	0.411305	2.275	0.00745	0.106463	no	262.707	0.411305	0.411305	2	0	0	OK	838.734	777.364	-0.109622	-0.573935	0.5009	0.942369	no	808.049	-0.109622	0.109622	2	0	0
3386	ENSMUSG00000021948	ENSMUSG00000021948	Prkcd	14:30595353-30626210	protein kinase C, delta [Source:MGI Symbol;Acc:MGI:97598]	protein_coding	ENSG00000163932	PRKCD	OK	70.7983	79.871	0.173956	0.777151	0.36425	0.867136	no	75.3346	0.173956	0.173956	2	0	0	OK	583.12	772.865	0.406424	1.72764	0.04135	0.325504	no	677.993	0.406424	0.406424	2	0	0
20425	ENSMUSG00000073409	ENSMUSG00000073409	H2-Q6	17:35424849-35430055	histocompatibility 2, Q region locus 6 [Source:MGI Symbol;Acc:MGI:95935]	protein_coding	none	NA	OK	219.262	129.863	-0.755669	-4.1217	5e-05	0.0019768	yes	174.562	-0.755669	0.755669	2	0	0	OK	746.941	770.922	0.0455916	0.243242	0.77715	0.99264	no	758.932	0.0455916	0.0455916	2	0	0
7739	ENSMUSG00000030263	ENSMUSG00000030263	Lrmp	6:145115652-145211005	lymphoid-restricted membrane protein [Source:MGI Symbol;Acc:MGI:108424]	protein_coding	ENSG00000118308	LRMP	OK	521.004	626.326	0.265619	1.32868	0.10965	0.549253	no	573.665	0.265619	0.265619	2	0	0	OK	646.91	759.993	0.232422	1.1511	0.1633	0.637185	no	703.452	0.232422	0.232422	2	0	0
11328	ENSMUSG00000038900	ENSMUSG00000038900	Rpl12	2:32876113-32965345	ribosomal protein L12 [Source:MGI Symbol;Acc:MGI:98002]	protein_coding	ENSG00000197958	RPL12	OK	2807.2	2335.06	-0.265676	-1.40524	0.09535	0.51189	no	2571.13	-0.265676	0.265676	2	0	0	OK	579.699	752.216	0.375842	1.96249	0.02115	0.213613	no	665.957	0.375842	0.375842	2	0	0
17363	ENSMUSG00000062006	ENSMUSG00000062006	Rpl34	3:130726830-130730398	ribosomal protein L34 [Source:MGI Symbol;Acc:MGI:1915686]	protein_coding	ENSG00000109475	RPL34	OK	1201.07	1029.96	-0.221723	-1.19142	0.1641	0.638452	no	1115.51	-0.221723	0.221723	2	0	0	OK	548.347	744.056	0.440322	2.30662	0.0074	0.10599	no	646.202	0.440322	0.440322	2	0	0
1076	ENSMUSG00000007029	ENSMUSG00000007029	Vars	17:35000986-35016322	valyl-tRNA synthetase [Source:MGI Symbol;Acc:MGI:90675]	protein_coding	ENSG00000204394	VARS	OK	392.157	390.543	-0.00594972	-0.0152886	0.98545	0.997088	no	391.35	-0.00594972	0.00594972	2	0	0	OK	742.073	732.039	-0.0196394	-0.0491132	0.9546	0.994937	no	737.056	-0.0196394	0.0196394	2	0	0
2532	ENSMUSG00000020460	ENSMUSG00000020460	Rps27a	11:29545845-29578367	ribosomal protein S27A [Source:MGI Symbol;Acc:MGI:1925544]	protein_coding	ENSG00000143947	RPS27A	OK	1879.96	1590.86	-0.240901	-1.31136	0.1255	0.582179	no	1735.41	-0.240901	0.240901	2	0	0	OK	558.805	729.006	0.383584	2.07871	0.01295	0.153008	no	643.905	0.383584	0.383584	2	0	0
17672	ENSMUSG00000063316	ENSMUSG00000063316	Rpl27	11:101442297-101445529	ribosomal protein L27 [Source:MGI Symbol;Acc:MGI:98036]	protein_coding	ENSG00000131469	RPL27	OK	1137.88	1161.62	0.0297879	0.131439	0.87985	0.992781	no	1149.75	0.0297879	0.0297879	2	0	0	OK	668.958	710.105	0.0861179	0.374617	0.6625	0.980083	no	689.532	0.0861179	0.0861179	2	0	0
22883	ENSMUSG00000079523	ENSMUSG00000079523	Tmsb10	6:72957346-72958748	thymosin, beta 10 [Source:MGI Symbol;Acc:MGI:109146]	protein_coding	ENSG00000034510	TMSB10	OK	494.376	433.233	-0.190465	-1.01957	0.2303	0.734653	no	463.804	-0.190465	0.190465	2	0	0	OK	682.435	701.705	0.040173	0.216842	0.8008	0.992781	no	692.07	0.040173	0.040173	2	0	0
16607	ENSMUSG00000058546	ENSMUSG00000058546	Rpl23a	11:78176710-78183584	ribosomal protein L23A [Source:MGI Symbol;Acc:MGI:3040672]	protein_coding	none	NA	OK	1210.27	1033.79	-0.227391	-1.23909	0.14825	0.608804	no	1122.03	-0.227391	0.227391	2	0	0	OK	593.656	691.599	0.220307	1.17121	0.1686	0.645384	no	642.628	0.220307	0.220307	2	0	0
16609	ENSMUSG00000058558	ENSMUSG00000058558	Rpl5	5:107900501-107987085	ribosomal protein L5 [Source:MGI Symbol;Acc:MGI:102854]	protein_coding	none	NA	OK	1601.38	1312.91	-0.286544	-1.48901	0.082	0.474393	no	1457.14	-0.286544	0.286544	2	0	0	OK	562.096	690.403	0.296621	1.51142	0.07935	0.466427	no	626.25	0.296621	0.296621	2	0	0
1955	ENSMUSG00000018567	ENSMUSG00000018567	Gabarap	11:69991142-69994951	gamma-aminobutyric acid receptor associated protein [Source:MGI Symbol;Acc:MGI:1861742]	protein_coding	ENSG00000170296	GABARAP	OK	181.888	179.134	-0.0220173	-0.110637	0.89825	0.992805	no	180.511	-0.0220173	0.0220173	2	0	0	OK	601.157	683.363	0.184911	0.983116	0.252	0.760407	no	642.26	0.184911	0.184911	2	0	0
8032	ENSMUSG00000030795	ENSMUSG00000030795	Fus	7:127967456-127985701	fused in sarcoma [Source:MGI Symbol;Acc:MGI:1353633]	protein_coding	ENSG00000089280	FUS	OK	556.615	713.598	0.358432	1.32882	0.11535	0.561939	no	635.106	0.358432	0.358432	2	0	0	OK	651.523	681.497	0.0648903	0.232701	0.7841	0.992781	no	666.51	0.0648903	0.0648903	2	0	0
5002	ENSMUSG00000025362	ENSMUSG00000025362	Rps26	10:128624533-128626747	ribosomal protein S26 [Source:MGI Symbol;Acc:MGI:1351628]	protein_coding	none	NA	OK	2156.62	1964.86	-0.134347	-0.73436	0.38315	0.880691	no	2060.74	-0.134347	0.134347	2	0	0	OK	523.129	673.302	0.364088	1.97093	0.0213	0.214667	no	598.216	0.364088	0.364088	2	0	0
3585	ENSMUSG00000022283	ENSMUSG00000022283	Pabpc1	15:36595660-36609668	poly(A) binding protein, cytoplasmic 1 [Source:MGI Symbol;Acc:MGI:1349722]	protein_coding	none	NA	OK	1891.45	1926.01	0.0261265	0.0960779	0.9066	0.992805	no	1908.73	0.0261265	0.0261265	2	0	0	OK	606.796	673.165	0.149748	0.610811	0.4686	0.930438	no	639.981	0.149748	0.149748	2	0	0
5438	ENSMUSG00000026238	ENSMUSG00000026238	Ptma	1:86526725-86530712	prothymosin alpha [Source:MGI Symbol;Acc:MGI:97803]	protein_coding	ENSG00000187514	PTMA	OK	1646.7	2065.83	0.327147	1.48917	0.08055	0.470101	no	1856.26	0.327147	0.327147	2	0	0	OK	669.447	670.486	0.00223714	0.0101188	0.99005	0.997555	no	669.966	0.00223714	0.00223714	2	0	0
14542	ENSMUSG00000049517	ENSMUSG00000049517	Rps23	13:90922957-90924950	ribosomal protein S23 [Source:MGI Symbol;Acc:MGI:1913725]	protein_coding	ENSG00000186468	RPS23	OK	1415.61	1205.19	-0.232166	-1.26849	0.1351	0.597763	no	1310.4	-0.232166	0.232166	2	0	0	OK	492.039	666.056	0.43687	2.35929	0.006	0.0923876	no	579.048	0.43687	0.43687	2	0	0
5284	ENSMUSG00000025967	ENSMUSG00000025967	Eef1b2	1:62958417-63180486	eukaryotic translation elongation factor 1 beta 2 [Source:MGI Symbol;Acc:MGI:1929520]	protein_coding	ENSG00000114942	EEF1B2	OK	2134.39	1863.27	-0.195993	-0.954391	0.2636	0.772627	no	1998.83	-0.195993	0.195993	2	0	0	OK	588.292	662.426	0.171227	0.628711	0.46065	0.928442	no	625.359	0.171227	0.171227	2	0	0
32851	ENSMUSG00000093674	ENSMUSG00000093674	Rpl41	10:128548113-128549305	ribosomal protein L41 [Source:MGI Symbol;Acc:MGI:1915195]	protein_coding	none	NA	OK	2185.14	1897.13	-0.203904	-1.11121	0.19235	0.683548	no	2041.13	-0.203904	0.203904	2	0	0	OK	483.961	655.583	0.437889	2.31115	0.0068	0.101145	no	569.772	0.437889	0.437889	2	0	0
17113	ENSMUSG00000060743	ENSMUSG00000060743	H3f3a	1:180800831-180816859	H3 histone, family 3A [Source:MGI Symbol;Acc:MGI:1097686]	protein_coding	ENSG00000163041	H3F3A	OK	358.957	399.342	0.153817	0.66822	0.4302	0.911417	no	379.149	0.153817	0.153817	2	0	0	OK	567.12	653.731	0.205042	0.860691	0.3122	0.821764	no	610.426	0.205042	0.205042	2	0	0
7409	ENSMUSG00000029614	ENSMUSG00000029614	Rpl6	5:121204480-121209241	ribosomal protein L6 [Source:MGI Symbol;Acc:MGI:108057]	protein_coding	ENSG00000089009	RPL6	OK	1378.29	1259.08	-0.130508	-0.530856	0.52675	0.950891	no	1318.68	-0.130508	0.130508	2	0	0	OK	558.625	648.564	0.215369	0.883435	0.3023	0.811841	no	603.594	0.215369	0.215369	2	0	0
5199	ENSMUSG00000025794	ENSMUSG00000025794	Rpl14	9:120571443-120574654	ribosomal protein L14 [Source:MGI Symbol;Acc:MGI:1914365]	protein_coding	none	NA	OK	2071.64	1890.14	-0.13228	-0.674665	0.4303	0.911457	no	1980.89	-0.13228	0.13228	2	0	0	OK	604.48	648.036	0.10038	0.519739	0.5492	0.959013	no	626.258	0.10038	0.10038	2	0	0
15225	ENSMUSG00000052146	ENSMUSG00000052146	Rps10	17:27579381-27636868	ribosomal protein S10 [Source:MGI Symbol;Acc:MGI:1914347]	protein_coding	none	NA	OK	1100.46	1010.91	-0.122452	-0.566611	0.5121	0.946492	no	1055.68	-0.122452	0.122452	2	0	0	OK	461.813	639.706	0.470101	2.03207	0.0184	0.194217	no	550.76	0.470101	0.470101	2	0	0
6319	ENSMUSG00000027808	ENSMUSG00000027808	Serp1	3:58519816-58557501	stress-associated endoplasmic reticulum protein 1 [Source:MGI Symbol;Acc:MGI:92638]	protein_coding	ENSG00000120742	SERP1	OK	142.366	166.49	0.225834	1.10264	0.19135	0.682142	no	154.428	0.225834	0.225834	2	0	0	OK	531.8	639.528	0.266123	1.34254	0.1175	0.567221	no	585.664	0.266123	0.266123	2	0	0
16244	ENSMUSG00000056851	ENSMUSG00000056851	Pcbp2	15:102455525-102517064	poly(rC) binding protein 2 [Source:MGI Symbol;Acc:MGI:108202]	protein_coding	ENSG00000197111	PCBP2	OK	824.658	831.233	0.0114561	0.0513484	0.95075	0.994556	no	827.946	0.0114561	0.0114561	2	0	0	OK	586.849	638.087	0.120765	0.50847	0.5424	0.956313	no	612.468	0.120765	0.120765	2	0	0
2295	ENSMUSG00000020077	ENSMUSG00000020077	Srgn	10:62493832-62527451	serglycin [Source:MGI Symbol;Acc:MGI:97756]	protein_coding	ENSG00000122862	SRGN	OK	296.982	220.234	-0.431338	-2.27688	0.0088	0.118294	no	258.608	-0.431338	0.431338	2	0	0	OK	733.342	634.4	-0.209093	-1.13237	0.1811	0.665579	no	683.871	-0.209093	0.209093	2	0	0
1018	ENSMUSG00000006519	ENSMUSG00000006519	Cyba	8:119910359-124345724	cytochrome b-245, alpha polypeptide [Source:MGI Symbol;Acc:MGI:1316658]	protein_coding	ENSG00000051523	CYBA	OK	235.115	252.844	0.104878	0.0934877	0.9096	0.992805	no	243.98	0.104878	0.104878	2	0	0	OK	450.533	632.808	0.490136	0.638696	0.45175	0.924039	no	541.67	0.490136	0.490136	2	0	0
17528	ENSMUSG00000062647	ENSMUSG00000062647	Rpl7a	2:26910763-26913318	ribosomal protein L7A [Source:MGI Symbol;Acc:MGI:1353472]	protein_coding	none	NA	OK	1597.68	1483.02	-0.107444	-0.570102	0.489	0.93714	no	1540.35	-0.107444	0.107444	2	0	0	OK	519.919	630.322	0.277802	1.482	0.0781	0.462452	no	575.12	0.277802	0.277802	2	0	0
6806	ENSMUSG00000028639	ENSMUSG00000028639	Ybx1	4:119277980-119294604	Y box protein 1 [Source:MGI Symbol;Acc:MGI:99146]	protein_coding	ENSG00000065978	YBX1	OK	1194.81	1380.19	0.20808	1.0266	0.21625	0.717366	no	1287.5	0.20808	0.20808	2	0	0	OK	718.723	627.798	-0.195136	-0.971264	0.2404	0.74805	no	673.26	-0.195136	0.195136	2	0	0
8362	ENSMUSG00000031447	ENSMUSG00000031447	Lamp1	8:13159160-13200620	lysosomal-associated membrane protein 1 [Source:MGI Symbol;Acc:MGI:96745]	protein_coding	ENSG00000185896	LAMP1	OK	117.422	127.913	0.123464	0.658177	0.4213	0.906968	no	122.667	0.123464	0.123464	2	0	0	OK	496.694	622.053	0.32468	1.70816	0.0403	0.323099	no	559.374	0.32468	0.32468	2	0	0
4202	ENSMUSG00000023944	ENSMUSG00000023944	Hsp90ab1	17:45567774-45573271	heat shock protein 90 alpha (cytosolic), class B member 1 [Source:MGI Symbol;Acc:MGI:96247]	protein_coding	ENSG00000096384	HSP90AB1	OK	1608.21	1837.93	0.192628	0.887991	0.27865	0.789784	no	1723.07	0.192628	0.192628	2	0	0	OK	666.423	619.391	-0.105587	-0.497814	0.5271	0.951035	no	642.907	-0.105587	0.105587	2	0	0
16922	ENSMUSG00000059895	ENSMUSG00000059895	Ptp4a3	15:73723144-73758766	protein tyrosine phosphatase 4a3 [Source:MGI Symbol;Acc:MGI:1277098]	protein_coding	ENSG00000184489	PTP4A3	OK	324.583	346.309	0.0934715	0.477314	0.573	0.966328	no	335.446	0.0934715	0.0934715	2	0	0	OK	673.075	616.765	-0.126047	-0.619991	0.4649	0.929944	no	644.92	-0.126047	0.126047	2	0	0
1212	ENSMUSG00000009079	ENSMUSG00000009079	Ewsr1	11:5069688-5106093	Ewing sarcoma breakpoint region 1 [Source:MGI Symbol;Acc:MGI:99960]	protein_coding	ENSG00000182944	EWSR1	OK	602.373	668.479	0.150227	0.631439	0.4511	0.923881	no	635.426	0.150227	0.150227	2	0	0	OK	514.416	614.293	0.25599	1.10752	0.1941	0.68658	no	564.355	0.25599	0.25599	2	0	0
10068	ENSMUSG00000035530	ENSMUSG00000035530	Eif1	11:100319884-100322096	eukaryotic translation initiation factor 1 [Source:MGI Symbol;Acc:MGI:105125]	protein_coding	ENSG00000173812	EIF1	OK	549.572	502.502	-0.12918	-0.511939	0.5475	0.958061	no	526.037	-0.12918	0.12918	2	0	0	OK	544.551	610.466	0.164844	0.652346	0.43815	0.915169	no	577.509	0.164844	0.164844	2	0	0
1903	ENSMUSG00000018293	ENSMUSG00000018293	Pfn1	11:70651849-70654644	profilin 1 [Source:MGI Symbol;Acc:MGI:97549]	protein_coding	ENSG00000108518	PFN1	OK	1121.51	1219.56	0.120921	0.652659	0.43445	0.913662	no	1170.53	0.120921	0.120921	2	0	0	OK	559.726	608.733	0.121089	0.6486	0.44695	0.921201	no	584.229	0.121089	0.121089	2	0	0
257	ENSMUSG00000001472	ENSMUSG00000001472	Tcf25	8:119910359-124345724	transcription factor 25 (basic helix-loop-helix) [Source:MGI Symbol;Acc:MGI:1914105]	protein_coding	ENSG00000141002	TCF25	OK	1071.57	773.046	-0.471096	-0.139091	0.64875	0.978501	no	922.308	-0.471096	0.471096	2	0	0	OK	571.953	590.718	0.0465738	0.0121176	0.96295	0.995041	no	581.335	0.0465738	0.0465738	2	0	0
12250	ENSMUSG00000041453	ENSMUSG00000041453	Rpl21	5:146832889-146837032	ribosomal protein L21 [Source:MGI Symbol;Acc:MGI:1278340]	protein_coding	ENSG00000122026	RPL21	OK	1183.77	1070.84	-0.144646	-0.788406	0.34825	0.854094	no	1127.3	-0.144646	0.144646	2	0	0	OK	438.087	583.793	0.414239	2.24185	0.0088	0.118294	no	510.94	0.414239	0.414239	2	0	0
8584	ENSMUSG00000031818	ENSMUSG00000031818	Cox4i1	8:119910359-124345724	cytochrome c oxidase subunit 4I1 [Source:MGI Symbol;Acc:MGI:88473]	protein_coding	ENSG00000131143	COX4I1	OK	858.048	918.192	0.0977372	0.122578	0.89035	0.992805	no	888.12	0.0977372	0.0977372	2	0	0	OK	465.57	571.336	0.29534	0.306304	0.709	0.987593	no	518.453	0.29534	0.29534	2	0	0
16954	ENSMUSG00000060036	ENSMUSG00000060036	Rpl3	15:80077790-80119501	ribosomal protein L3 [Source:MGI Symbol;Acc:MGI:1351605]	protein_coding	ENSG00000100316	RPL3	OK	2636.08	2087.93	-0.33632	-1.37094	0.10785	0.544783	no	2362.01	-0.33632	0.33632	2	0	0	OK	504.464	569.282	0.174393	0.739189	0.38395	0.88113	no	536.873	0.174393	0.174393	2	0	0
10348	ENSMUSG00000036438	ENSMUSG00000036438	Calm2	17:87433411-87446935	calmodulin 2 [Source:MGI Symbol;Acc:MGI:103250]	protein_coding	ENSG00000143933	CALM2	OK	238.873	278.081	0.219261	1.14913	0.17425	0.654386	no	258.477	0.219261	0.219261	2	0	0	OK	501.812	568.35	0.179631	0.952277	0.2659	0.775299	no	535.081	0.179631	0.179631	2	0	0
128	ENSMUSG00000000740	ENSMUSG00000000740	Rpl13	8:119910359-124345724	ribosomal protein L13 [Source:MGI Symbol;Acc:MGI:105922]	protein_coding	ENSG00000167526	RPL13	OK	1208.25	1019.14	-0.245577	-0.481031	0.57585	0.967087	no	1113.69	-0.245577	0.245577	2	0	0	OK	397.354	553.298	0.477631	0.615672	0.4632	0.929598	no	475.326	0.477631	0.477631	2	0	0
7478	ENSMUSG00000029713	ENSMUSG00000029713	Gnb2	5:137483019-137540718	guanine nucleotide binding protein (G protein), beta 2 [Source:MGI Symbol;Acc:MGI:95784]	protein_coding	ENSG00000172354	GNB2	OK	536.364	542.786	0.0171708	0.0806139	0.9247	0.993025	no	539.575	0.0171708	0.0171708	2	0	0	OK	476.954	552.507	0.212142	0.71782	0.407	0.896958	no	514.731	0.212142	0.212142	2	0	0
1185	ENSMUSG00000008682	ENSMUSG00000008682	Rpl10	X:74270811-74273135	ribosomal protein L10 [Source:MGI Symbol;Acc:MGI:105943]	protein_coding	none	NA	OK	1641.39	1536.59	-0.0951825	-0.513941	0.5465	0.957618	no	1588.99	-0.0951825	0.0951825	2	0	0	OK	480.574	547.448	0.187963	1.00862	0.236	0.741391	no	514.011	0.187963	0.187963	2	0	0
12015	ENSMUSG00000040699	ENSMUSG00000040699	Limd2	11:106156255-106161158	LIM domain containing 2 [Source:MGI Symbol;Acc:MGI:1915053]	protein_coding	ENSG00000136490	LIMD2	OK	220.534	215.27	-0.0348535	-0.159196	0.848	0.992781	no	217.902	-0.0348535	0.0348535	2	0	0	OK	476.899	547.064	0.198024	0.896263	0.2945	0.806011	no	511.981	0.198024	0.198024	2	0	0
10189	ENSMUSG00000035929	ENSMUSG00000035929	H2-Q4	17:35377020-35385290	histocompatibility 2, Q region locus 4 [Source:MGI Symbol;Acc:MGI:95933]	protein_coding	none	NA	OK	191.345	109.992	-0.798783	-4.22316	5e-05	0.0019768	yes	150.668	-0.798783	0.798783	2	0	0	OK	539.584	546.885	0.0193914	0.102669	0.899	0.992805	no	543.235	0.0193914	0.0193914	2	0	0
230	ENSMUSG00000001289	ENSMUSG00000001289	Pfdn5	15:102326115-102338139	prefoldin 5 [Source:MGI Symbol;Acc:MGI:1928753]	protein_coding	ENSG00000123349	PFDN5	OK	387.636	368.548	-0.0728511	-0.297215	0.72095	0.989023	no	378.092	-0.0728511	0.0728511	2	0	0	OK	410.636	538.461	0.390981	1.73266	0.0432	0.334421	no	474.548	0.390981	0.390981	2	0	0
3702	ENSMUSG00000022471	ENSMUSG00000022471	Xrcc6	15:81987834-82040085	X-ray repair complementing defective repair in Chinese hamster cells 6 [Source:MGI Symbol;Acc:MGI:95606]	protein_coding	ENSG00000196419	XRCC6	OK	119.78	125.696	0.0695535	0.212919	0.7968	0.992781	no	122.738	0.0695535	0.0695535	2	0	0	OK	780.561	534.732	-0.545695	-1.63299	0.0501	0.360943	no	657.647	-0.545695	0.545695	2	0	0
13683	ENSMUSG00000046364	ENSMUSG00000046364	Rpl27a	7:109519146-109522367	ribosomal protein L27A [Source:MGI Symbol;Acc:MGI:1347076]	protein_coding	ENSG00000166441	RPL27A	OK	1314.77	1045.59	-0.330495	-1.71582	0.04045	0.323703	no	1180.18	-0.330495	0.330495	2	0	0	OK	384.564	529.168	0.460504	2.27144	0.0074	0.10599	no	456.866	0.460504	0.460504	2	0	0
6225	ENSMUSG00000027620	ENSMUSG00000027620	Rbm39	2:156147238-156180238	RNA binding motif protein 39 [Source:MGI Symbol;Acc:MGI:2157953]	protein_coding	ENSG00000131051	RBM39	OK	273.355	303.037	0.148715	0.56426	0.50385	0.943544	no	288.196	0.148715	0.148715	2	0	0	OK	536.481	516.016	-0.0561101	-0.215916	0.79875	0.992781	no	526.248	-0.0561101	0.0561101	2	0	0
10651	ENSMUSG00000037266	ENSMUSG00000037266	Rsrp1	4:134923591-134927671	arginine/serine rich protein 1 [Source:MGI Symbol;Acc:MGI:106498]	protein_coding	ENSG00000117616	RSRP1	OK	198.924	211.149	0.0860399	0.353193	0.6725	0.982027	no	205.036	0.0860399	0.0860399	2	0	0	OK	557.118	505.737	-0.139597	-0.595854	0.4736	0.932588	no	531.428	-0.139597	0.139597	2	0	0
12814	ENSMUSG00000043243	ENSMUSG00000043243	Fam129c	8:71592175-71607936	family with sequence similarity 129, member C [Source:MGI Symbol;Acc:MGI:3686743]	protein_coding	ENSG00000167483	FAM129C	OK	9.99142	26.9349	1.43072	1.95086	0.01495	0.168521	no	18.4632	1.43072	1.43072	2	1	0	OK	435.362	500.311	0.20061	0.665819	0.40255	0.894559	no	467.837	0.20061	0.20061	2	0	0
2696	ENSMUSG00000020719	ENSMUSG00000020719	Ddx5	11:106780354-106789185	DEAD (Asp-Glu-Ala-Asp) box polypeptide 5 [Source:MGI Symbol;Acc:MGI:105037]	protein_coding	ENSG00000108654	DDX5	OK	345.232	414.264	0.262985	1.19882	0.11825	0.568604	no	379.748	0.262985	0.262985	2	0	0	OK	609.725	490.176	-0.314859	-1.40827	0.07665	0.457081	no	549.951	-0.314859	0.314859	2	0	0
17186	ENSMUSG00000061132	ENSMUSG00000061132	Blnk	19:40928926-40994535	B cell linker [Source:MGI Symbol;Acc:MGI:96878]	protein_coding	ENSG00000095585	BLNK	OK	90.4752	99.7037	0.140125	0.743165	0.38065	0.878416	no	95.0894	0.140125	0.140125	2	0	0	OK	523.17	487.743	-0.10116	-0.544969	0.52285	0.950348	no	505.457	-0.10116	0.10116	2	0	0
34559	ENSMUSG00000095742	ENSMUSG00000095742	CAAA01147332.1	JH584295.1:65-1479		protein_coding	none	NA	OK	289.4	261.882	-0.144145	-0.55902	0.51365	0.947184	no	275.641	-0.144145	0.144145	2	0	0	OK	436.537	484.478	0.150327	0.657925	0.4396	0.916498	no	460.507	0.150327	0.150327	2	0	0
7231	ENSMUSG00000029322	ENSMUSG00000029322	Plac8	5:100553724-100572245	placenta-specific 8 [Source:MGI Symbol;Acc:MGI:2445289]	protein_coding	ENSG00000145287	PLAC8	OK	653.069	715.522	0.131761	0.719528	0.39895	0.892618	no	684.295	0.131761	0.131761	2	0	0	OK	362.018	482.761	0.415247	2.24106	0.00855	0.117252	no	422.389	0.415247	0.415247	2	0	0
5019	ENSMUSG00000025393	ENSMUSG00000025393	Atp5b	10:128083272-128090391	ATP synthase, H+ transporting mitochondrial F1 complex, beta subunit [Source:MGI Symbol;Acc:MGI:107801]	protein_coding	ENSG00000110955	ATP5F1B	OK	1480.87	1521.62	0.0391669	0.14349	0.8678	0.992781	no	1501.24	0.0391669	0.0391669	2	0	0	OK	463.477	480.252	0.0512911	0.196935	0.81555	0.992781	no	471.865	0.0512911	0.0512911	2	0	0
9016	ENSMUSG00000032518	ENSMUSG00000032518	Rpsa	9:120127688-120132369	ribosomal protein SA [Source:MGI Symbol;Acc:MGI:105381]	protein_coding	none	NA	OK	2081.3	1789.62	-0.217834	-1.10179	0.18795	0.67639	no	1935.46	-0.217834	0.217834	2	0	0	OK	356.292	479.125	0.427341	2.22198	0.00785	0.110142	no	417.708	0.427341	0.427341	2	0	0
10328	ENSMUSG00000036371	ENSMUSG00000036371	Serbp1	6:67179798-67376188	serpine1 mRNA binding protein 1 [Source:MGI Symbol;Acc:MGI:1914120]	protein_coding	ENSG00000142864	SERBP1	OK	1081.81	1219.57	0.172924	0.757637	0.3693	0.870963	no	1150.69	0.172924	0.172924	2	0	0	OK	520.767	476.209	-0.129043	-0.558869	0.50795	0.944763	no	498.488	-0.129043	0.129043	2	0	0
1472	ENSMUSG00000014195	ENSMUSG00000014195	Dnajc7	11:100574903-100704271	DnaJ heat shock protein family (Hsp40) member C7 [Source:MGI Symbol;Acc:MGI:1928373]	protein_coding	ENSG00000168259	DNAJC7	OK	284.952	340.034	0.254962	0.883619	0.29805	0.808043	no	312.493	0.254962	0.254962	2	0	0	OK	457.811	474.76	0.0524456	0.171532	0.844	0.992781	no	466.285	0.0524456	0.0524456	2	0	0
1053	ENSMUSG00000006728	ENSMUSG00000006728	Cdk4	10:127063533-127070264	cyclin-dependent kinase 4 [Source:MGI Symbol;Acc:MGI:88357]	protein_coding	ENSG00000135446	CDK4	OK	669.878	753.927	0.170525	0.730482	0.3892	0.884741	no	711.903	0.170525	0.170525	2	0	0	OK	378.577	469.567	0.310743	1.264	0.13865	0.599714	no	424.072	0.310743	0.310743	2	0	0
11605	ENSMUSG00000039637	ENSMUSG00000039637	Coro7	16:4626132-4707695	coronin 7 [Source:MGI Symbol;Acc:MGI:1926135]	protein_coding	ENSG00000262246	CORO7	OK	203.477	179.342	-0.182153	-0.481438	0.57575	0.967031	no	191.41	-0.182153	0.182153	2	0	0	OK	385.804	465.174	0.269904	0.751305	0.37945	0.877729	no	425.489	0.269904	0.269904	2	0	0
9441	ENSMUSG00000033767	ENSMUSG00000033767	Tmem131l	3:83897654-84040175	transmembrane 131 like [Source:MGI Symbol;Acc:MGI:2443399]	protein_coding	ENSG00000121210	TMEM131L	OK	63.551	74.9462	0.23794	0.625728	0.46275	0.929454	no	69.2486	0.23794	0.23794	2	0	0	OK	518.428	465.025	-0.156835	-0.401688	0.6409	0.977381	no	491.726	-0.156835	0.156835	2	0	0
22742	ENSMUSG00000079197	ENSMUSG00000079197	Psme2	14:55587440-55591113	proteasome (prosome, macropain) activator subunit 2 (PA28 beta) [Source:MGI Symbol;Acc:MGI:1096365]	protein_coding	NA	NA	OK	664.165	732.417	0.141124	0.336394	0.68545	0.984183	no	698.291	0.141124	0.141124	2	0	0	OK	332.939	460.799	0.468879	1.18584	0.1551	0.621303	no	396.869	0.468879	0.468879	2	0	0
22560	ENSMUSG00000078812	ENSMUSG00000078812	Eif5a	11:69916713-69921958	eukaryotic translation initiation factor 5A [Source:MGI Symbol;Acc:MGI:106248]	protein_coding	NA	NA	OK	1109.71	1388.46	0.323309	1.6639	0.05085	0.362595	no	1249.09	0.323309	0.323309	2	0	0	OK	412.728	459.238	0.15405	0.801749	0.3492	0.854874	no	435.983	0.15405	0.15405	2	0	0
9282	ENSMUSG00000033220	ENSMUSG00000033220	Rac2	15:78559166-78572783	Rac family small GTPase 2 [Source:MGI Symbol;Acc:MGI:97846]	protein_coding	ENSG00000128340	RAC2	OK	590.777	710.744	0.266716	0.519875	0.5322	0.953343	no	650.761	0.266716	0.266716	2	0	0	OK	496.579	451.905	-0.136006	-0.251822	0.76415	0.99264	no	474.242	-0.136006	0.136006	2	0	0
15523	ENSMUSG00000053510	ENSMUSG00000053510	Nrd1	4:109000654-109202272	nardilysin, N-arginine dibasic convertase, NRD convertase 1 [Source:MGI Symbol;Acc:MGI:1201386]	protein_coding	ENSG00000078618	NRDC	OK	424.299	420.403	-0.0133107	-0.0103983	0.9884	0.997456	no	422.351	-0.0133107	0.0133107	2	0	0	OK	633.21	448.991	-0.495997	-0.364741	0.63695	0.97656	no	541.101	-0.495997	0.495997	2	0	0
7415	ENSMUSG00000029622	ENSMUSG00000029622	Arpc1b	5:145114214-145140238	actin related protein 2/3 complex, subunit 1B [Source:MGI Symbol;Acc:MGI:1343142]	protein_coding	ENSG00000130429	ARPC1B	OK	554.436	574.683	0.0517462	0.176963	0.8088	0.992781	no	564.56	0.0517462	0.0517462	2	0	0	OK	364.349	447.015	0.295003	1.16104	0.15605	0.622809	no	405.682	0.295003	0.295003	2	0	0
6075	ENSMUSG00000027368	ENSMUSG00000027368	Dusp2	2:127336158-127338376	dual specificity phosphatase 2 [Source:MGI Symbol;Acc:MGI:101911]	protein_coding	ENSG00000158050	DUSP2	OK	83.878	72.1099	-0.218095	-1.083	0.20165	0.6977	no	77.9939	-0.218095	0.218095	2	0	0	OK	454.092	438.048	-0.0518951	-0.2617	0.76055	0.99264	no	446.07	-0.0518951	0.0518951	2	0	0
246	ENSMUSG00000001418	ENSMUSG00000001418	Glmp	3:88325022-88336148	glycosylated lysosomal membrane protein [Source:MGI Symbol;Acc:MGI:1913318]	protein_coding	ENSG00000198715	GLMP	OK	98.4525	104.017	0.079323	0.307388	0.71935	0.988968	no	101.235	0.079323	0.079323	2	0	0	OK	330.897	437.305	0.402256	1.66883	0.0496	0.359267	no	384.101	0.402256	0.402256	2	0	0
17712	ENSMUSG00000063511	ENSMUSG00000063511	Snrnp70	7:45376452-45395742	small nuclear ribonucleoprotein 70 (U1) [Source:MGI Symbol;Acc:MGI:98341]	protein_coding	ENSG00000104852	SNRNP70	OK	410.859	587.887	0.516895	0.935367	0.17585	0.656679	no	499.373	0.516895	0.516895	2	0	0	OK	352.953	437.198	0.308813	0.549323	0.4482	0.921994	no	395.075	0.308813	0.308813	2	0	0
101	ENSMUSG00000000568	ENSMUSG00000000568	Hnrnpd	5:99955934-99978938	heterogeneous nuclear ribonucleoprotein D [Source:MGI Symbol;Acc:MGI:101947]	protein_coding	ENSG00000138668	HNRNPD	OK	676.864	766.377	0.17919	0.786965	0.35235	0.857625	no	721.62	0.17919	0.17919	2	0	0	OK	381.435	436.991	0.196166	0.854307	0.31225	0.821781	no	409.213	0.196166	0.196166	2	0	0
6720	ENSMUSG00000028495	ENSMUSG00000028495	Rps6	4:86854659-86857412	ribosomal protein S6 [Source:MGI Symbol;Acc:MGI:98159]	protein_coding	ENSG00000137154	RPS6	OK	1024.05	875.886	-0.225477	-1.23874	0.14595	0.606705	no	949.968	-0.225477	0.225477	2	0	0	OK	327.203	436.789	0.416753	2.25996	0.00895	0.119626	no	381.996	0.416753	0.416753	2	0	0
5861	ENSMUSG00000026958	ENSMUSG00000026958	Dpp7	2:25352275-25356359	dipeptidylpeptidase 7 [Source:MGI Symbol;Acc:MGI:1933213]	protein_coding	ENSG00000176978	DPP7	OK	9.70708	14.2709	0.555971	1.32	0.1305	0.591179	no	11.989	0.555971	0.555971	2	0	0	OK	257.037	422.276	0.71621	2.57826	0.00325	0.0586935	no	339.656	0.71621	0.71621	2	0	0
26743	ENSMUSG00000084786	ENSMUSG00000084786	Ubl5	9:20618117-20647140	ubiquitin-like 5 [Source:MGI Symbol;Acc:MGI:1913427]	protein_coding	NA	NA	OK	418.251	471.888	0.174075	0.679217	0.4189	0.905429	no	445.069	0.174075	0.174075	2	0	0	OK	406.887	419.081	0.0426002	0.10266	0.9046	0.992805	no	412.984	0.0426002	0.0426002	2	0	0
17602	ENSMUSG00000062997	ENSMUSG00000062997	Rpl35	2:38996712-39015877	ribosomal protein L35 [Source:MGI Symbol;Acc:MGI:1913739]	protein_coding	NA	NA	OK	898.768	785.451	-0.194429	-0.704538	0.41655	0.903569	no	842.11	-0.194429	0.194429	2	0	0	OK	274.058	418.531	0.610854	1.82646	0.0282	0.257692	no	346.294	0.610854	0.610854	2	0	0
22837	ENSMUSG00000079435	ENSMUSG00000079435	Rpl36a	X:134585653-134588062	ribosomal protein L36A [Source:MGI Symbol;Acc:MGI:1201789]	protein_coding	ENSG00000241343	RPL36A	OK	1765.31	1392.7	-0.34204	-1.88259	0.0265	0.246672	no	1579.01	-0.34204	0.34204	2	0	0	OK	378.137	415.907	0.137354	0.714597	0.4003	0.893512	no	397.022	0.137354	0.137354	2	0	0
13173	ENSMUSG00000044533	ENSMUSG00000044533	Rps2	17:24718115-24721929	ribosomal protein S2 [Source:MGI Symbol;Acc:MGI:105110]	protein_coding	ENSG00000140988	RPS2	OK	1568.15	1497.68	-0.0663307	-0.315377	0.7106	0.987697	no	1532.91	-0.0663307	0.0663307	2	0	0	OK	340.003	414.947	0.28738	1.29591	0.12845	0.588193	no	377.475	0.28738	0.28738	2	0	0
5143	ENSMUSG00000025647	ENSMUSG00000025647	Shisa5	9:109038564-109057777	shisa family member 5 [Source:MGI Symbol;Acc:MGI:1915044]	protein_coding	ENSG00000164054	SHISA5	OK	30.5315	25.3003	-0.271143	-1.12631	0.153	0.617406	no	27.9159	-0.271143	0.271143	2	0	0	OK	415.214	410.718	-0.0157085	-0.0618704	0.9338	0.993661	no	412.966	-0.0157085	0.0157085	2	0	0
4471	ENSMUSG00000024399	ENSMUSG00000024399	Ltb	17:35194438-35196320	lymphotoxin B [Source:MGI Symbol;Acc:MGI:104796]	protein_coding	ENSG00000227507	LTB	OK	99.4596	49.4364	-1.00854	-4.91643	5e-05	0.0019768	yes	74.448	-1.00854	1.00854	2	1	1	OK	479.486	410.142	-0.225366	-1.22363	0.1478	0.608078	no	444.814	-0.225366	0.225366	2	0	0
11563	ENSMUSG00000039515	ENSMUSG00000039515	Ptpa	2:30416038-30447806	protein phosphatase 2 protein activator [Source:MGI Symbol;Acc:MGI:1346006]	protein_coding	ENSG00000119383	PTPA	OK	414.193	456.879	0.141508	0.0732681	0.86635	0.992781	no	435.536	0.141508	0.141508	2	0	0	OK	616.709	410.128	-0.588516	-0.349719	0.67685	0.98228	no	513.418	-0.588516	0.588516	2	0	0
8328	ENSMUSG00000031387	ENSMUSG00000031387	Renbp	X:73922120-73930850	renin binding protein [Source:MGI Symbol;Acc:MGI:105940]	protein_coding	ENSG00000102032	RENBP	OK	41.6461	37.6204	-0.146668	-0.418965	0.62085	0.974166	no	39.6332	-0.146668	0.146668	2	0	0	OK	337.312	409.431	0.279535	1.09179	0.19845	0.692449	no	373.371	0.279535	0.279535	2	0	0
12281	ENSMUSG00000041560	ENSMUSG00000041560	Nop53	7:15936182-15946074	NOP53 ribosome biogenesis factor [Source:MGI Symbol;Acc:MGI:2154441]	protein_coding	ENSG00000105373	NOP53	OK	396.249	337.719	-0.230582	-0.903826	0.28455	0.79622	no	366.984	-0.230582	0.230582	2	0	0	OK	300.493	407.661	0.440038	1.72029	0.0423	0.3304	no	354.077	0.440038	0.440038	2	0	0
596	ENSMUSG00000003484	ENSMUSG00000003484	Cyp4f18	8:71951037-72009626	cytochrome P450, family 4, subfamily f, polypeptide 18 [Source:MGI Symbol;Acc:MGI:1919304]	protein_coding	ENSG00000186529	CYP4F3	OK	170.825	179.818	0.0740243	0.289897	0.7358	0.991384	no	175.322	0.0740243	0.0740243	2	0	0	OK	397.192	406.993	0.0351661	0.147362	0.85795	0.992781	no	402.092	0.0351661	0.0351661	2	0	0
10444	ENSMUSG00000036751	ENSMUSG00000036751	Cox6b1	7:30616860-30626151	cytochrome c oxidase, subunit 6B1 [Source:MGI Symbol;Acc:MGI:107460]	protein_coding	ENSG00000126267	COX6B1	OK	922.071	1074.31	0.220464	1.16141	0.17335	0.653093	no	998.19	0.220464	0.220464	2	0	0	OK	357.56	406.411	0.184754	0.869136	0.31175	0.821418	no	381.986	0.184754	0.184754	2	0	0
6698	ENSMUSG00000028459	ENSMUSG00000028459	Cd72	4:43441938-43454628	CD72 antigen [Source:MGI Symbol;Acc:MGI:88345]	protein_coding	ENSG00000137101	CD72	OK	83.449	103.029	0.30409	1.09611	0.197	0.690933	no	93.239	0.30409	0.30409	2	0	0	OK	396.821	405.792	0.0322523	0.127882	0.88035	0.992781	no	401.307	0.0322523	0.0322523	2	0	0
4243	ENSMUSG00000024014	ENSMUSG00000024014	Pim1	17:29430797-29496112	proviral integration site 1 [Source:MGI Symbol;Acc:MGI:97584]	protein_coding	ENSG00000137193	PIM1	OK	228.689	286.523	0.325263	1.29467	0.1101	0.550188	no	257.606	0.325263	0.325263	2	0	0	OK	449.109	400.995	-0.16348	-0.661454	0.41045	0.899222	no	425.052	-0.16348	0.16348	2	0	0
17803	ENSMUSG00000063882	ENSMUSG00000063882	Uqcrh	4:116066964-116075071	ubiquinol-cytochrome c reductase hinge protein [Source:MGI Symbol;Acc:MGI:1913826]	protein_coding	NA	NA	OK	532.177	536.923	0.012807	0.067055	0.93315	0.993661	no	534.55	0.012807	0.012807	2	0	0	OK	351.504	399.24	0.183717	0.923991	0.28455	0.79622	no	375.372	0.183717	0.183717	2	0	0
3217	ENSMUSG00000021660	ENSMUSG00000021660	Btf3	13:98309895-98324415	basic transcription factor 3 [Source:MGI Symbol;Acc:MGI:1202875]	protein_coding	none	NA	OK	791.43	707.48	-0.161771	-0.852588	0.3168	0.826622	no	749.455	-0.161771	0.161771	2	0	0	OK	332.941	397.906	0.257162	1.3224	0.12315	0.578411	no	365.423	0.257162	0.257162	2	0	0
47912	ENSMUSG00000110195	ENSMUSG00000110195	Pde2a	7:101348066-101512827	phosphodiesterase 2A, cGMP-stimulated [Source:MGI Symbol;Acc:MGI:2446107]	protein_coding	NA	NA	OK	142.244	226.631	0.671979	2.53993	0.00055	0.0151958	yes	184.438	0.671979	0.671979	2	0	0	OK	444.673	397.526	-0.161697	-0.597447	0.39295	0.888141	no	421.1	-0.161697	0.161697	2	0	0
17216	ENSMUSG00000061315	ENSMUSG00000061315	Naca	10:128035574-128048637	nascent polypeptide-associated complex alpha polypeptide [Source:MGI Symbol;Acc:MGI:106095]	protein_coding	ENSG00000196531	NACA	OK	716.508	684.703	-0.0655042	-0.357457	0.67415	0.982109	no	700.606	-0.0655042	0.0655042	2	0	0	OK	357.942	397.013	0.149459	0.813669	0.3338	0.842158	no	377.477	0.149459	0.149459	2	0	0
19364	ENSMUSG00000068328	ENSMUSG00000068328	Aup1	6:83034172-83057808	ancient ubiquitous protein 1 [Source:MGI Symbol;Acc:MGI:107789]	protein_coding	ENSG00000115307	AUP1	OK	315.518	326.971	0.0514414	0.199914	0.8114	0.992781	no	321.245	0.0514414	0.0514414	2	0	0	OK	363.115	396.624	0.127345	0.520862	0.52575	0.95051	no	379.87	0.127345	0.127345	2	0	0
7974	ENSMUSG00000030707	ENSMUSG00000030707	Coro1a	7:126687458-126707787	coronin, actin binding protein 1A [Source:MGI Symbol;Acc:MGI:1345961]	protein_coding	ENSG00000102879	CORO1A	OK	776.538	933.991	0.266352	1.13463	0.1802	0.663785	no	855.264	0.266352	0.266352	2	0	0	OK	372.916	395.458	0.0846716	0.352232	0.67585	0.982203	no	384.187	0.0846716	0.0846716	2	0	0
10201	ENSMUSG00000035953	ENSMUSG00000035953	Pip4p1	14:50924967-50930856	phosphatidylinositol-4,5-bisphosphate 4-phosphatase 1 [Source:MGI Symbol;Acc:MGI:2448501]	protein_coding	ENSG00000165782	PIP4P1	OK	128.699	109.113	-0.238175	-0.379002	0.6577	0.978996	no	118.906	-0.238175	0.238175	2	0	0	OK	328.884	394.549	0.262627	0.693127	0.41375	0.901307	no	361.716	0.262627	0.262627	2	0	0
156	ENSMUSG00000000903	ENSMUSG00000000903	Vpreb3	10:75943056-75949657	pre-B lymphocyte gene 3 [Source:MGI Symbol;Acc:MGI:98938]	protein_coding	ENSG00000128218	VPREB3	OK	921.049	984.046	0.095448	0.524763	0.539	0.955636	no	952.548	0.095448	0.095448	2	0	0	OK	327.315	393.431	0.265431	1.37992	0.1049	0.537925	no	360.373	0.265431	0.265431	2	0	0
6045	ENSMUSG00000027330	ENSMUSG00000027330	Cdc25b	2:131146323-131198497	cell division cycle 25B [Source:MGI Symbol;Acc:MGI:99701]	protein_coding	ENSG00000101224	CDC25B	OK	98.2862	59.6126	-0.721371	-1.99088	0.00615	0.0941831	no	78.9494	-0.721371	0.721371	2	0	0	OK	426.505	393.275	-0.117024	-0.372589	0.6326	0.976524	no	409.89	-0.117024	0.117024	2	0	0
13422	ENSMUSG00000045382	ENSMUSG00000045382	Cxcr4	1:128588198-128592293	chemokine (C-X-C motif) receptor 4 [Source:MGI Symbol;Acc:MGI:109563]	protein_coding	ENSG00000121966	CXCR4	OK	27.6819	38.0063	0.457297	2.09166	0.0124	0.148658	no	32.8441	0.457297	0.457297	2	0	0	OK	280.715	391.85	0.481193	2.56522	0.00275	0.0516133	no	336.283	0.481193	0.481193	2	0	0
1894	ENSMUSG00000018209	ENSMUSG00000018209	Stk4	2:164053539-164155524	serine/threonine kinase 4 [Source:MGI Symbol;Acc:MGI:1929004]	protein_coding	ENSG00000101109	STK4	OK	58.6556	74.3806	0.342657	1.24083	0.09095	0.500411	no	66.5181	0.342657	0.342657	2	0	0	OK	454.801	388.125	-0.228712	-0.948876	0.20265	0.698802	no	421.463	-0.228712	0.228712	2	0	0
7971	ENSMUSG00000030703	ENSMUSG00000030703	Gdpd3	7:126766333-126776818	glycerophosphodiester phosphodiesterase domain containing 3 [Source:MGI Symbol;Acc:MGI:1915866]	protein_coding	ENSG00000102886	GDPD3	OK	70.5111	58.6769	-0.26506	-1.14809	0.1759	0.656705	no	64.594	-0.26506	0.26506	2	0	0	OK	375.715	387.284	0.0437543	0.216927	0.8003	0.992781	no	381.5	0.0437543	0.0437543	2	0	0
9969	ENSMUSG00000035242	ENSMUSG00000035242	Oaz1	10:80826655-80829290	ornithine decarboxylase antizyme 1 [Source:MGI Symbol;Acc:MGI:109433]	protein_coding	ENSG00000104904	OAZ1	OK	484.959	556.247	0.197865	0.9854	0.2469	0.754745	no	520.603	0.197865	0.197865	2	0	0	OK	351.521	386.773	0.137874	0.650586	0.4497	0.922924	no	369.147	0.137874	0.137874	2	0	0
645	ENSMUSG00000003873	ENSMUSG00000003873	Bax	7:45461696-45526268	BCL2-associated X protein [Source:MGI Symbol;Acc:MGI:99702]	protein_coding	ENSG00000087088	BAX	OK	204.304	288.498	0.497844	0.717653	0.37385	0.874645	no	246.401	0.497844	0.497844	2	0	0	OK	230.481	381.664	0.727654	0.974638	0.2132	0.713841	no	306.072	0.727654	0.727654	2	0	0
8883	ENSMUSG00000032312	ENSMUSG00000032312	Csk	9:57626645-57653631	c-src tyrosine kinase [Source:MGI Symbol;Acc:MGI:88537]	protein_coding	ENSG00000103653	CSK	OK	282.414	305.219	0.112034	0.448219	0.58365	0.968909	no	293.817	0.112034	0.112034	2	0	0	OK	301.704	378.676	0.327829	1.26043	0.1196	0.571053	no	340.19	0.327829	0.327829	2	0	0
731	ENSMUSG00000004626	ENSMUSG00000004626	Stxbp2	8:3630954-3643644	syntaxin binding protein 2 [Source:MGI Symbol;Acc:MGI:107370]	protein_coding	ENSG00000076944	STXBP2	OK	194.677	203.745	0.0656855	0.11862	0.8874	0.992805	no	199.211	0.0656855	0.0656855	2	0	0	OK	322.381	378.427	0.231248	0.429688	0.611	0.973311	no	350.404	0.231248	0.231248	2	0	0
8034	ENSMUSG00000030798	ENSMUSG00000030798	Cd37	7:45215752-45239115	CD37 antigen [Source:MGI Symbol;Acc:MGI:88330]	protein_coding	ENSG00000104894	CD37	OK	653.43	580.566	-0.170572	-0.73534	0.3615	0.864529	no	616.998	-0.170572	0.170572	2	0	0	OK	360.653	377.299	0.0650972	0.268333	0.73965	0.992082	no	368.976	0.0650972	0.0650972	2	0	0
10691	ENSMUSG00000037364	ENSMUSG00000037364	Srrt	5:137295703-137307674	serrate RNA effector molecule homolog (Arabidopsis) [Source:MGI Symbol;Acc:MGI:1933527]	protein_coding	ENSG00000087087	SRRT	OK	318.546	381.118	0.258735	1.05953	0.21195	0.711901	no	349.832	0.258735	0.258735	2	0	0	OK	372.619	377.132	0.0173699	0.0715699	0.93365	0.993661	no	374.875	0.0173699	0.0173699	2	0	0
16757	ENSMUSG00000059208	ENSMUSG00000059208	Hnrnpm	17:33646232-33718670	heterogeneous nuclear ribonucleoprotein M [Source:MGI Symbol;Acc:MGI:1926465]	protein_coding	ENSG00000099783	HNRNPM	OK	324.115	445.109	0.457653	1.81193	0.03065	0.271889	no	384.612	0.457653	0.457653	2	0	0	OK	379.258	375.913	-0.0127816	-0.0454958	0.9603	0.995028	no	377.586	-0.0127816	0.0127816	2	0	0
87	ENSMUSG00000000486	ENSMUSG00000000486	Sept1	7:127214446-127238179	septin 1 [Source:MGI Symbol;Acc:MGI:1858916]	protein_coding	ENSG00000180096	SEPT1	OK	251.535	272.645	0.116265	0.506092	0.543	0.956313	no	262.09	0.116265	0.116265	2	0	0	OK	380.678	373.417	-0.0277834	-0.121213	0.88185	0.992781	no	377.048	-0.0277834	0.0277834	2	0	0
6125	ENSMUSG00000027447	ENSMUSG00000027447	Cst3	2:148871721-148875692	cystatin C [Source:MGI Symbol;Acc:MGI:102519]	protein_coding	ENSG00000101439	CST3	OK	465.907	649.87	0.480108	2.15029	0.0118	0.14323	no	557.889	0.480108	0.480108	2	0	0	OK	259.621	372.106	0.519306	2.24572	0.00865	0.117341	no	315.863	0.519306	0.519306	2	0	0
2354	ENSMUSG00000020167	ENSMUSG00000020167	Tcf3	10:80409513-80433647	transcription factor 3 [Source:MGI Symbol;Acc:MGI:98510]	protein_coding	ENSG00000071564	TCF3	OK	158.832	187.94	0.24277	1.22161	0.1466	0.607095	no	173.386	0.24277	0.24277	2	0	0	FAIL	359.11	370.511	0	0	1	1	no	364.811	0	0	2	0	0
951	ENSMUSG00000006169	ENSMUSG00000006169	Clint1	11:45852050-45910625	clathrin interactor 1 [Source:MGI Symbol;Acc:MGI:2144243]	protein_coding	ENSG00000113282	CLINT1	OK	54.882	55.3278	0.0116733	0.0623005	0.94085	0.993842	no	55.1049	0.0116733	0.0116733	2	0	0	OK	432.602	368.61	-0.230945	-1.23774	0.14495	0.605254	no	400.606	-0.230945	0.230945	2	0	0
17065	ENSMUSG00000060550	ENSMUSG00000060550	H2-Q7	17:35439154-35443773	histocompatibility 2, Q region locus 7 [Source:MGI Symbol;Acc:MGI:95936]	protein_coding	none	NA	OK	248.606	108.705	-1.19344	-5.71057	5e-05	0.0019768	yes	178.655	-1.19344	1.19344	2	1	1	OK	423.966	368.56	-0.202049	-0.948987	0.2638	0.772865	no	396.263	-0.202049	0.202049	2	0	0
214	ENSMUSG00000001175	ENSMUSG00000001175	Calm1	12:100199434-100209814	calmodulin 1 [Source:MGI Symbol;Acc:MGI:88251]	protein_coding	ENSG00000198668	CALM1	OK	323.26	418.649	0.373047	1.1776	0.1694	0.646762	no	370.954	0.373047	0.373047	2	0	0	OK	424.519	367.353	-0.208663	-0.622811	0.47205	0.932105	no	395.936	-0.208663	0.208663	2	0	0
3483	ENSMUSG00000022108	ENSMUSG00000022108	Itm2b	14:73362225-73385289	integral membrane protein 2B [Source:MGI Symbol;Acc:MGI:1309517]	protein_coding	ENSG00000136156	ITM2B	OK	135.299	126.821	-0.0933555	-0.454429	0.58195	0.968392	no	131.06	-0.0933555	0.0933555	2	0	0	OK	420.386	365.694	-0.201075	-1.00113	0.2274	0.73069	no	393.04	-0.201075	0.201075	2	0	0
1253	ENSMUSG00000009585	ENSMUSG00000009585	Apobec3	15:79889531-79971119	apolipoprotein B mRNA editing enzyme, catalytic polypeptide 3 [Source:MGI Symbol;Acc:MGI:1933111]	protein_coding	ENSG00000100298	APOBEC3H	OK	155.816	156.545	0.00673855	0.0304644	0.971	0.995328	no	156.18	0.00673855	0.00673855	2	0	0	OK	369.973	364.427	-0.021787	-0.0933007	0.9056	0.992805	no	367.2	-0.021787	0.021787	2	0	0
845	ENSMUSG00000005447	ENSMUSG00000005447	Pafah1b3	7:25295048-25297986	platelet-activating factor acetylhydrolase, isoform 1b, subunit 3 [Source:MGI Symbol;Acc:MGI:108414]	protein_coding	ENSG00000079462	PAFAH1B3	OK	87.8597	75.4227	-0.220204	-1.0345	0.2241	0.727126	no	81.6412	-0.220204	0.220204	2	0	0	OK	368.564	364.306	-0.016764	-0.0882025	0.9166	0.993025	no	366.435	-0.016764	0.016764	2	0	0
2242	ENSMUSG00000019982	ENSMUSG00000019982	Myb	10:21124934-21160984	myeloblastosis oncogene [Source:MGI Symbol;Acc:MGI:97249]	protein_coding	ENSG00000118513	MYB	OK	37.3003	58.2716	0.643606	1.14766	0.0139	0.160436	no	47.7859	0.643606	0.643606	2	0	0	OK	397.786	363.22	-0.131152	-0.526704	0.41505	0.902258	no	380.503	-0.131152	0.131152	2	0	0
16621	ENSMUSG00000058600	ENSMUSG00000058600	Rpl30	15:34440504-34444812	ribosomal protein L30 [Source:MGI Symbol;Acc:MGI:98037]	protein_coding	none	NA	OK	677.045	555.161	-0.286347	-1.43777	0.0927	0.504899	no	616.103	-0.286347	0.286347	2	0	0	OK	292.996	363.031	0.30921	1.52116	0.0723	0.444968	no	328.014	0.30921	0.30921	2	0	0
15944	ENSMUSG00000055436	ENSMUSG00000055436	Srsf11	3:158010472-158036639	serine/arginine-rich splicing factor 11 [Source:MGI Symbol;Acc:MGI:1916457]	protein_coding	ENSG00000116754	SRSF11	OK	259.94	294.377	0.179489	0.641934	0.43055	0.911579	no	277.159	0.179489	0.179489	2	0	0	OK	428.169	362.403	-0.240584	-0.867791	0.2911	0.802271	no	395.286	-0.240584	0.240584	2	0	0
16709	ENSMUSG00000059005	ENSMUSG00000059005	Hnrnpa3	2:75659243-75669407	heterogeneous nuclear ribonucleoprotein A3 [Source:MGI Symbol;Acc:MGI:1917171]	protein_coding	ENSG00000170144	HNRNPA3	OK	634.82	806.526	0.345374	1.72392	0.04435	0.337944	no	720.673	0.345374	0.345374	2	0	0	OK	321.606	362.056	0.170917	0.855749	0.31095	0.820827	no	341.831	0.170917	0.170917	2	0	0
8872	ENSMUSG00000032299	ENSMUSG00000032299	Commd4	9:57155034-57158331	COMM domain containing 4 [Source:MGI Symbol;Acc:MGI:1913449]	protein_coding	ENSG00000140365	COMMD4	OK	91.8625	118.333	0.365307	1.08053	0.2018	0.697707	no	105.098	0.365307	0.365307	2	0	0	OK	247.387	353.38	0.514454	2.06465	0.0198	0.204406	no	300.384	0.514454	0.514454	2	0	0
12042	ENSMUSG00000040747	ENSMUSG00000040747	Cd53	3:106759920-106790149	CD53 antigen [Source:MGI Symbol;Acc:MGI:88341]	protein_coding	ENSG00000143119	CD53	OK	348.168	256.4	-0.441388	-2.43057	0.00635	0.0963567	no	302.284	-0.441388	0.441388	2	0	0	OK	419.847	353.339	-0.248813	-1.37068	0.11055	0.551362	no	386.593	-0.248813	0.248813	2	0	0
17083	ENSMUSG00000060636	ENSMUSG00000060636	Rpl35a	16:32914099-33127695	ribosomal protein L35A [Source:MGI Symbol;Acc:MGI:1928894]	protein_coding	none	NA	OK	619.014	492.806	-0.32895	-1.51457	0.07605	0.455525	no	555.91	-0.32895	0.32895	2	0	0	OK	260.126	349.326	0.425363	1.57465	0.0643	0.417935	no	304.726	0.425363	0.425363	2	0	0
7322	ENSMUSG00000029465	ENSMUSG00000029465	Arpc3	5:122391877-122414184	actin related protein 2/3 complex, subunit 3 [Source:MGI Symbol;Acc:MGI:1928375]	protein_coding	ENSG00000111229	ARPC3	OK	420.683	467.94	0.153592	0.830776	0.32025	0.830325	no	444.312	0.153592	0.153592	2	0	0	OK	370.876	348.44	-0.0900272	-0.481753	0.5707	0.965998	no	359.658	-0.0900272	0.0900272	2	0	0
4773	ENSMUSG00000024948	ENSMUSG00000024948	Map4k2	19:6341134-6378030	mitogen-activated protein kinase kinase kinase kinase 2 [Source:MGI Symbol;Acc:MGI:1346883]	protein_coding	ENSG00000168067	MAP4K2	OK	160.718	160.831	0.00101435	0.00140872	0.9985	0.999376	no	160.774	0.00101435	0.00101435	2	0	0	OK	421.083	347.612	-0.276628	-0.503033	0.5421	0.956313	no	384.348	-0.276628	0.276628	2	0	0
10179	ENSMUSG00000035891	ENSMUSG00000035891	Cerk	15:86139127-86187152	ceramide kinase [Source:MGI Symbol;Acc:MGI:2386052]	protein_coding	ENSG00000100422	CERK	OK	36.1675	53.9626	0.577266	3.07048	0.00045	0.0129202	yes	45.065	0.577266	0.577266	2	0	0	OK	356.159	346.514	-0.0396066	-0.207952	0.8035	0.992781	no	351.337	-0.0396066	0.0396066	2	0	0
6831	ENSMUSG00000028675	ENSMUSG00000028675	Pnrc2	4:135870917-135873850	proline-rich nuclear receptor coactivator 2 [Source:MGI Symbol;Acc:MGI:106512]	protein_coding	ENSG00000189266	PNRC2	OK	135.42	142.686	0.0754034	0.0727481	0.93005	0.993228	no	139.053	0.0754034	0.0754034	2	0	0	OK	369.913	343.828	-0.105501	-0.100064	0.89995	0.992805	no	356.87	-0.105501	0.105501	2	0	0
7677	ENSMUSG00000030156	ENSMUSG00000030156	Cd69	6:129267324-129275436	CD69 antigen [Source:MGI Symbol;Acc:MGI:88343]	protein_coding	ENSG00000110848	CD69	OK	41.0026	22.3047	-0.878365	-3.59462	5e-05	0.0019768	yes	31.6536	-0.878365	0.878365	2	0	0	OK	383.546	343.468	-0.159224	-0.791428	0.35325	0.858377	no	363.507	-0.159224	0.159224	2	0	0
20089	ENSMUSG00000071644	ENSMUSG00000071644	Eef1g	19:8967040-8978479	eukaryotic translation elongation factor 1 gamma [Source:MGI Symbol;Acc:MGI:1914410]	protein_coding	ENSG00000254772	EEF1G	OK	824.515	844.804	0.0350702	0.178873	0.83365	0.992781	no	834.659	0.0350702	0.0350702	2	0	0	OK	305.768	342.839	0.165094	0.830711	0.32925	0.838023	no	324.303	0.165094	0.165094	2	0	0
7072	ENSMUSG00000029064	ENSMUSG00000029064	Gnb1	4:155491360-155559269	guanine nucleotide binding protein (G protein), beta 1 [Source:MGI Symbol;Acc:MGI:95781]	protein_coding	ENSG00000078369	GNB1	OK	452.483	440.992	-0.0371116	-0.143145	0.8689	0.992781	no	446.738	-0.0371116	0.0371116	2	0	0	OK	284.242	342.351	0.268358	0.985957	0.24005	0.747703	no	313.297	0.268358	0.268358	2	0	0
15729	ENSMUSG00000054435	ENSMUSG00000054435	Gimap4	6:48684548-48692060	GTPase, IMAP family member 4 [Source:MGI Symbol;Acc:MGI:1349656]	protein_coding	ENSG00000133574	GIMAP4	OK	272.012	289.564	0.0902098	0.466306	0.58795	0.970133	no	280.788	0.0902098	0.0902098	2	0	0	OK	465.952	341.822	-0.446933	-2.26815	0.0076	0.107706	no	403.887	-0.446933	0.446933	2	0	0
17176	ENSMUSG00000061086	ENSMUSG00000061086	Myl4	11:104550662-104595753	myosin, light polypeptide 4 [Source:MGI Symbol;Acc:MGI:97267]	protein_coding	ENSG00000198336	MYL4	OK	145.377	146.071	0.00687298	0.0337105	0.969	0.99505	no	145.724	0.00687298	0.00687298	2	0	0	OK	278.662	340.516	0.289206	1.48499	0.08135	0.472181	no	309.589	0.289206	0.289206	2	0	0
8593	ENSMUSG00000031827	ENSMUSG00000031827	Cotl1	8:119809221-119840544	coactosin-like 1 (Dictyostelium) [Source:MGI Symbol;Acc:MGI:1919292]	protein_coding	ENSG00000103187	COTL1	OK	427.018	437.908	0.0363307	0.0699486	0.93525	0.99371	no	432.463	0.0363307	0.0363307	2	0	0	OK	367.951	340.443	-0.112101	-0.226127	0.7872	0.992781	no	354.197	-0.112101	0.112101	2	0	0
10123	ENSMUSG00000035711	ENSMUSG00000035711	Dok3	13:55523230-55529296	docking protein 3 [Source:MGI Symbol;Acc:MGI:1351490]	protein_coding	ENSG00000146094	DOK3	OK	54.0225	59.9996	0.151392	0.761627	0.36735	0.869589	no	57.011	0.151392	0.151392	2	0	0	OK	318.941	339.895	0.0917975	0.49003	0.562	0.963324	no	329.418	0.0917975	0.0917975	2	0	0
896	ENSMUSG00000005779	ENSMUSG00000005779	Psmb4	3:94884092-94886961	proteasome (prosome, macropain) subunit, beta type 4 [Source:MGI Symbol;Acc:MGI:1098257]	protein_coding	ENSG00000159377	PSMB4	OK	576.565	586.768	0.0253072	0.0926056	0.9088	0.992805	no	581.667	0.0253072	0.0253072	2	0	0	OK	308.642	338.722	0.134165	0.472258	0.576	0.967108	no	323.682	0.134165	0.134165	2	0	0
8810	ENSMUSG00000032187	ENSMUSG00000032187	Smarca4	9:21616168-21704230	SWI/SNF related, matrix associated, actin dependent regulator of chromatin, subfamily a, member 4 [Source:MGI Symbol;Acc:MGI:88192]	protein_coding	ENSG00000127616	SMARCA4	OK	104.77	140.301	0.421303	2.31652	0.00725	0.10599	no	122.535	0.421303	0.421303	2	0	0	OK	408.752	337.22	-0.277537	-1.44075	0.09085	0.500251	no	372.986	-0.277537	0.277537	2	0	0
9839	ENSMUSG00000034868	ENSMUSG00000034868	Myl12b	17:70853766-71475343	myosin, light chain 12B, regulatory [Source:MGI Symbol;Acc:MGI:107494]	protein_coding	NA	NA	OK	279.164	266.531	-0.066811	-0.15554	0.85165	0.992781	no	272.847	-0.066811	0.066811	2	0	0	OK	412.888	336.773	-0.293974	-0.733596	0.36035	0.863602	no	374.831	-0.293974	0.293974	2	0	0
3548	ENSMUSG00000022216	ENSMUSG00000022216	Psme1	14:55578122-55585302	proteasome (prosome, macropain) activator subunit 1 (PA28 alpha) [Source:MGI Symbol;Acc:MGI:1096367]	protein_coding	ENSG00000092010	PSME1	OK	494.088	511.508	0.0499884	0.242675	0.78215	0.992697	no	502.798	0.0499884	0.0499884	2	0	0	OK	356.589	336.326	-0.0844	-0.405415	0.6368	0.97656	no	346.457	-0.0844	0.0844	2	0	0
13988	ENSMUSG00000047446	ENSMUSG00000047446	Arl4a	12:40005446-40038025	ADP-ribosylation factor-like 4A [Source:MGI Symbol;Acc:MGI:99437]	protein_coding	ENSG00000122644	ARL4A	OK	16.6796	13.3884	-0.317108	-1.15449	0.17565	0.65641	no	15.034	-0.317108	0.317108	2	0	0	OK	303.134	334.714	0.142973	0.642442	0.44035	0.91686	no	318.924	0.142973	0.142973	2	0	0
565	ENSMUSG00000003345	ENSMUSG00000003345	Csnk1g2	10:80622837-80640749	casein kinase 1, gamma 2 [Source:MGI Symbol;Acc:MGI:1920014]	protein_coding	ENSG00000133275	CSNK1G2	OK	296.751	283.954	-0.0635967	-0.142792	0.8641	0.992781	no	290.352	-0.0635967	0.0635967	2	0	0	OK	333.239	330.399	-0.012347	-0.0284369	0.97325	0.995525	no	331.819	-0.012347	0.012347	2	0	0
6918	ENSMUSG00000028820	ENSMUSG00000028820	Sfpq	4:127021323-127061152	splicing factor proline/glutamine rich (polypyrimidine tract binding protein associated) [Source:MGI Symbol;Acc:MGI:1918764]	protein_coding	ENSG00000116560	SFPQ	OK	277.089	403.736	0.543063	2.12747	0.0111	0.136913	no	340.413	0.543063	0.543063	2	0	0	OK	285.378	329.666	0.208132	0.793941	0.3475	0.853478	no	307.522	0.208132	0.208132	2	0	0
1890	ENSMUSG00000018171	ENSMUSG00000018171	Vmp1	11:86583864-86683836	vacuole membrane protein 1 [Source:MGI Symbol;Acc:MGI:1923159]	protein_coding	ENSG00000062716	VMP1	OK	75.2355	84.0336	0.159552	0.457702	0.5806	0.967994	no	79.6346	0.159552	0.159552	2	0	0	OK	365.675	328.859	-0.153091	-0.715633	0.3966	0.891201	no	347.267	-0.153091	0.153091	2	0	0
2732	ENSMUSG00000020788	ENSMUSG00000020788	Atp2a3	11:72961168-72993044	ATPase, Ca++ transporting, ubiquitous [Source:MGI Symbol;Acc:MGI:1194503]	protein_coding	ENSG00000074370	ATP2A3	OK	113.029	126.825	0.166147	0.594314	0.4124	0.900243	no	119.927	0.166147	0.166147	2	0	0	OK	449.211	328.392	-0.451972	-1.4869	0.0445	0.338128	no	388.802	-0.451972	0.451972	2	0	0
4971	ENSMUSG00000025283	ENSMUSG00000025283	Sat1	X:155213131-155216449	spermidine/spermine N1-acetyl transferase 1 [Source:MGI Symbol;Acc:MGI:98233]	protein_coding	ENSG00000130066	SAT1	OK	58.3111	47.8128	-0.286375	-1.21369	0.1525	0.616491	no	53.062	-0.286375	0.286375	2	0	0	OK	326.771	325.581	-0.00526644	-0.0256797	0.9752	0.995684	no	326.176	-0.00526644	0.00526644	2	0	0
935	ENSMUSG00000006005	ENSMUSG00000006005	Tpr	1:150361304-150466165	translocated promoter region, nuclear basket protein [Source:MGI Symbol;Acc:MGI:1922066]	protein_coding	ENSG00000047410	TPR	OK	302.355	332.114	0.135434	0.171772	0.8282	0.992781	no	317.235	0.135434	0.135434	2	0	0	OK	337.994	325.493	-0.0543699	-0.0588028	0.93905	0.993717	no	331.744	-0.0543699	0.0543699	2	0	0
8710	ENSMUSG00000032000	ENSMUSG00000032000	Birc3	9:7848698-7873186	baculoviral IAP repeat-containing 3 [Source:MGI Symbol;Acc:MGI:1197007]	protein_coding	ENSG00000023445	BIRC3	OK	51.6467	42.0786	-0.295588	-0.661396	0.43745	0.914957	no	46.8627	-0.295588	0.295588	2	0	0	OK	358.625	324.765	-0.143081	-0.383077	0.6456	0.978336	no	341.695	-0.143081	0.143081	2	0	0
1314	ENSMUSG00000010376	ENSMUSG00000010376	Nedd8	14:55662262-55681820	neural precursor cell expressed, developmentally down-regulated gene 8 [Source:MGI Symbol;Acc:MGI:97301]	protein_coding	ENSG00000129559	NEDD8	OK	465.053	542.512	0.222261	0.891447	0.29765	0.807851	no	503.782	0.222261	0.222261	2	0	0	OK	299.002	321.013	0.102475	0.327392	0.69845	0.985729	no	310.007	0.102475	0.102475	2	0	0
646	ENSMUSG00000003882	ENSMUSG00000003882	Il7r	15:9505787-9530176	interleukin 7 receptor [Source:MGI Symbol;Acc:MGI:96562]	protein_coding	ENSG00000168685	IL7R	OK	18.9308	29.118	0.621172	2.16782	0.00365	0.0636162	no	24.0244	0.621172	0.621172	2	0	0	OK	487.804	320.691	-0.605118	-2.0752	0.0043	0.0720087	no	404.247	-0.605118	0.605118	2	0	0
2936	ENSMUSG00000021134	ENSMUSG00000021134	Srsf5	12:80945503-80950507	serine/arginine-rich splicing factor 5 [Source:MGI Symbol;Acc:MGI:98287]	protein_coding	ENSG00000100650	SRSF5	OK	288.814	349.64	0.275728	1.37559	0.0981	0.519828	no	319.227	0.275728	0.275728	2	0	0	FAIL	299.241	320.241	0	0	1	1	no	309.741	0	0	2	0	0
36744	ENSMUSG00000098274	ENSMUSG00000098274	Rpl24	16:55966274-56029739	ribosomal protein L24 [Source:MGI Symbol;Acc:MGI:1915443]	protein_coding	ENSG00000114391	RPL24	OK	678.898	585.606	-0.213265	-0.99251	0.23125	0.735811	no	632.252	-0.213265	0.213265	2	0	0	OK	250.695	317.392	0.340332	1.25487	0.13085	0.592004	no	284.043	0.340332	0.340332	2	0	0
2978	ENSMUSG00000021218	ENSMUSG00000021218	Gdi2	13:3538062-3611108	guanosine diphosphate (GDP) dissociation inhibitor 2 [Source:MGI Symbol;Acc:MGI:99845]	protein_coding	ENSG00000057608	GDI2	OK	432.806	471.665	0.124043	0.415911	0.61555	0.973534	no	452.236	0.124043	0.124043	2	0	0	OK	348.937	316.005	-0.14302	-0.494469	0.5413	0.956313	no	332.471	-0.14302	0.14302	2	0	0
7266	ENSMUSG00000029385	ENSMUSG00000029385	Ccng2	5:93267256-93276231	cyclin G2 [Source:MGI Symbol;Acc:MGI:1095734]	protein_coding	ENSG00000138764	CCNG2	OK	41.3951	35.0291	-0.240906	-1.10903	0.1849	0.672102	no	38.2121	-0.240906	0.240906	2	0	0	OK	237.487	314.815	0.406654	2.01828	0.0151	0.169839	no	276.151	0.406654	0.406654	2	0	0
4443	ENSMUSG00000024349	ENSMUSG00000024349	Tmem173	18:35733678-35740554	transmembrane protein 173 [Source:MGI Symbol;Acc:MGI:1919762]	protein_coding	ENSG00000184584	TMEM173	OK	185.202	213.691	0.206423	0.756018	0.36495	0.868033	no	199.447	0.206423	0.206423	2	0	0	OK	247.459	313.428	0.340946	1.23845	0.1466	0.607095	no	280.443	0.340946	0.340946	2	0	0
7715	ENSMUSG00000030220	ENSMUSG00000030220	Arhgdib	6:136923654-136968865	Rho, GDP dissociation inhibitor (GDI) beta [Source:MGI Symbol;Acc:MGI:101940]	protein_coding	ENSG00000111348	ARHGDIB	OK	418.01	554.282	0.407085	2.04549	0.0176	0.188274	no	486.146	0.407085	0.407085	2	0	0	OK	395.055	309.386	-0.352645	-1.57528	0.063	0.413151	no	352.221	-0.352645	0.352645	2	0	0
65	ENSMUSG00000000346	ENSMUSG00000000346	Dazap2	15:100615348-100620761	DAZ associated protein 2 [Source:MGI Symbol;Acc:MGI:1344344]	protein_coding	ENSG00000183283	DAZAP2	OK	143.728	159.501	0.150224	0.782652	0.33095	0.839661	no	151.615	0.150224	0.150224	2	0	0	OK	313.76	307.745	-0.0279281	-0.145903	0.85615	0.992781	no	310.752	-0.0279281	0.0279281	2	0	0
1765	ENSMUSG00000017009	ENSMUSG00000017009	Sdc4	2:164424246-164443887	syndecan 4 [Source:MGI Symbol;Acc:MGI:1349164]	protein_coding	ENSG00000124145	SDC4	OK	69.8797	66.8604	-0.0637213	-0.341014	0.68625	0.9844	no	68.37	-0.0637213	0.0637213	2	0	0	OK	384.715	307.243	-0.324411	-1.77855	0.03685	0.305961	no	345.979	-0.324411	0.324411	2	0	0
4078	ENSMUSG00000023150	ENSMUSG00000023150	Ivns1abp	1:151339603-151364422	influenza virus NS1A binding protein [Source:MGI Symbol;Acc:MGI:2152389]	protein_coding	ENSG00000116679	IVNS1ABP	OK	155.463	229.376	0.561142	2.91285	0.0002	0.00660246	yes	192.419	0.561142	0.561142	2	0	0	OK	357.703	307.124	-0.219943	-1.1616	0.1688	0.645608	no	332.413	-0.219943	0.219943	2	0	0
12032	ENSMUSG00000040725	ENSMUSG00000040725	Hnrnpul1	7:25721164-25754757	heterogeneous nuclear ribonucleoprotein U-like 1 [Source:MGI Symbol;Acc:MGI:2443517]	protein_coding	ENSG00000105323	HNRNPUL1	OK	118.53	129.342	0.125939	0.68923	0.41675	0.90369	no	123.936	0.125939	0.125939	2	0	0	OK	309.153	307.099	-0.00961627	-0.0516965	0.95255	0.994937	no	308.126	-0.00961627	0.00961627	2	0	0
3602	ENSMUSG00000022312	ENSMUSG00000022312	Eif3h	15:51786557-51865523	eukaryotic translation initiation factor 3, subunit H [Source:MGI Symbol;Acc:MGI:1915385]	protein_coding	ENSG00000147677	EIF3H	OK	378.408	354.721	-0.0932545	-0.444317	0.59995	0.972428	no	366.565	-0.0932545	0.0932545	2	0	0	OK	294.885	304.255	0.0451289	0.212759	0.79485	0.992781	no	299.57	0.0451289	0.0451289	2	0	0
12105	ENSMUSG00000040940	ENSMUSG00000040940	Arhgef1	7:24902911-24926594	Rho guanine nucleotide exchange factor (GEF) 1 [Source:MGI Symbol;Acc:MGI:1353510]	protein_coding	ENSG00000076928	ARHGEF1	OK	245.289	242.076	-0.0190229	-0.0680843	0.92845	0.993025	no	243.683	-0.0190229	0.0190229	2	0	0	OK	243.305	304.07	0.321635	1.08264	0.1357	0.598012	no	273.688	0.321635	0.321635	2	0	0
9042	ENSMUSG00000032562	ENSMUSG00000032562	Gnai2	9:107614124-107635367	guanine nucleotide binding protein (G protein), alpha inhibiting 2 [Source:MGI Symbol;Acc:MGI:95772]	protein_coding	ENSG00000114353	GNAI2	OK	334.07	364.692	0.126528	0.234798	0.65505	0.978677	no	349.381	0.126528	0.126528	2	0	0	OK	264.992	303.814	0.197241	0.419226	0.43515	0.91391	no	284.403	0.197241	0.197241	2	0	0
9777	ENSMUSG00000034707	ENSMUSG00000034707	Gns	10:121365089-121397249	glucosamine (N-acetyl)-6-sulfatase [Source:MGI Symbol;Acc:MGI:1922862]	protein_coding	ENSG00000135677	GNS	OK	22.257	21.6562	-0.0394765	-0.118038	0.86385	0.992781	no	21.9566	-0.0394765	0.0394765	2	0	0	OK	271.927	301.49	0.148889	0.612704	0.3744	0.875125	no	286.709	0.148889	0.148889	2	0	0
1629	ENSMUSG00000015656	ENSMUSG00000015656	Hspa8	9:40800983-40810087	heat shock protein 8 [Source:MGI Symbol;Acc:MGI:105384]	protein_coding	ENSG00000109971	HSPA8	OK	736.547	915.7	0.314098	1.41542	0.09275	0.504899	no	826.124	0.314098	0.314098	2	0	0	OK	261.253	301.294	0.205725	0.932346	0.2719	0.782297	no	281.274	0.205725	0.205725	2	0	0
1245	ENSMUSG00000009549	ENSMUSG00000009549	Srp14	2:118475849-118479711	signal recognition particle 14 [Source:MGI Symbol;Acc:MGI:107169]	protein_coding	ENSG00000140319	SRP14	OK	166.237	155.963	-0.0920321	-0.453275	0.59625	0.971707	no	161.1	-0.0920321	0.0920321	2	0	0	OK	295.584	300.296	0.0228179	0.116523	0.88955	0.992805	no	297.94	0.0228179	0.0228179	2	0	0
8871	ENSMUSG00000032298	ENSMUSG00000032298	Neil1	9:57142799-57148305	nei endonuclease VIII-like 1 (E. coli) [Source:MGI Symbol;Acc:MGI:1920024]	protein_coding	ENSG00000140398	NEIL1	OK	51.8969	48.072	-0.110452	-0.560605	0.51465	0.947694	no	49.9845	-0.110452	0.110452	2	0	0	OK	277.579	296.514	0.0952006	0.522892	0.5404	0.955866	no	287.047	0.0952006	0.0952006	2	0	0
11709	ENSMUSG00000039910	ENSMUSG00000039910	Cited2	10:17723217-17725674	Cbp/p300-interacting transactivator, with Glu/Asp-rich carboxy-terminal domain, 2 [Source:MGI Symbol;Acc:MGI:1306784]	protein_coding	ENSG00000164442	CITED2	OK	499.398	644.416	0.3678	1.70769	0.0299	0.267549	no	571.907	0.3678	0.3678	2	0	0	OK	377.636	294.511	-0.358674	-1.75653	0.02545	0.241074	no	336.074	-0.358674	0.358674	2	0	0
3989	ENSMUSG00000022961	ENSMUSG00000022961	Son	16:91647505-91962915	Son DNA binding protein [Source:MGI Symbol;Acc:MGI:98353]	protein_coding	ENSG00000159140	SON	OK	150.377	172.404	0.197211	0.501122	0.54725	0.958005	no	161.391	0.197211	0.197211	2	0	0	OK	339.924	294.174	-0.20854	-0.554985	0.4875	0.936683	no	317.049	-0.20854	0.20854	2	0	0
4871	ENSMUSG00000025132	ENSMUSG00000025132	Arhgdia	11:120578103-120581624	Rho GDP dissociation inhibitor (GDI) alpha [Source:MGI Symbol;Acc:MGI:2178103]	protein_coding	ENSG00000141522	ARHGDIA	OK	344.63	403.177	0.226366	1.24794	0.1466	0.607095	no	373.904	0.226366	0.226366	2	0	0	OK	256.762	293.109	0.191005	1.05427	0.2166	0.717608	no	274.935	0.191005	0.191005	2	0	0
1700	ENSMUSG00000016252	ENSMUSG00000016252	Atp5e	2:174461071-174464105	ATP synthase, H+ transporting, mitochondrial F1 complex, epsilon subunit [Source:MGI Symbol;Acc:MGI:1855697]	protein_coding	ENSG00000124172	ATP5F1E	OK	528.002	535.104	0.0192747	0.100055	0.9071	0.992805	no	531.553	0.0192747	0.0192747	2	0	0	OK	217.639	290.728	0.417736	2.0021	0.01975	0.204001	no	254.184	0.417736	0.417736	2	0	0
2460	ENSMUSG00000020340	ENSMUSG00000020340	Cyfip2	11:46193849-46312859	cytoplasmic FMR1 interacting protein 2 [Source:MGI Symbol;Acc:MGI:1924134]	protein_coding	ENSG00000055163	CYFIP2	OK	57.4104	62.918	0.132161	0.635373	0.3975	0.891525	no	60.1642	0.132161	0.132161	2	0	0	OK	344.318	290.094	-0.247219	-1.23505	0.1279	0.587276	no	317.206	-0.247219	0.247219	2	0	0
22858	ENSMUSG00000079477	ENSMUSG00000079477	Rab7	6:87980420-88045270	RAB7, member RAS oncogene family [Source:MGI Symbol;Acc:MGI:105068]	protein_coding	ENSG00000075785	RAB7A	OK	121.419	143.896	0.245033	0.880579	0.28985	0.801194	no	132.657	0.245033	0.245033	2	0	0	OK	231.558	289.409	0.321736	1.28406	0.1185	0.569175	no	260.483	0.321736	0.321736	2	0	0
10623	ENSMUSG00000037197	ENSMUSG00000037197	Rbm17	2:11585436-11604153	RNA binding motif protein 17 [Source:MGI Symbol;Acc:MGI:1924188]	protein_coding	ENSG00000134453	RBM17	OK	259.584	253.412	-0.0347171	-0.134331	0.87475	0.992781	no	256.498	-0.0347171	0.0347171	2	0	0	OK	330.908	289.321	-0.193757	-0.775407	0.3574	0.861112	no	310.115	-0.193757	0.193757	2	0	0
5999	ENSMUSG00000027248	ENSMUSG00000027248	Pdia3	2:121392630-121438687	protein disulfide isomerase associated 3 [Source:MGI Symbol;Acc:MGI:95834]	protein_coding	ENSG00000167004	PDIA3	OK	241.867	346.495	0.518621	2.19149	0.0096	0.125431	no	294.181	0.518621	0.518621	2	0	0	OK	372.342	288.889	-0.366111	-1.52587	0.07285	0.446696	no	330.615	-0.366111	0.366111	2	0	0
5658	ENSMUSG00000026626	ENSMUSG00000026626	Ppp2r5a	1:191351974-191403272	protein phosphatase 2, regulatory subunit B', alpha [Source:MGI Symbol;Acc:MGI:2388479]	protein_coding	ENSG00000066027	PPP2R5A	OK	126.868	159.585	0.331	0.452604	0.57005	0.965711	no	143.226	0.331	0.331	2	0	0	OK	371.558	288.874	-0.363148	-0.555129	0.49405	0.940015	no	330.216	-0.363148	0.363148	2	0	0
6393	ENSMUSG00000027940	ENSMUSG00000027940	Tpm3	3:90072648-90100902	tropomyosin 3, gamma [Source:MGI Symbol;Acc:MGI:1890149]	protein_coding	none	NA	OK	359.72	526.371	0.549207	1.94249	0.024	0.232133	no	443.046	0.549207	0.549207	2	0	0	OK	326.403	288.408	-0.178539	-0.611089	0.4655	0.929944	no	307.406	-0.178539	0.178539	2	0	0
3024	ENSMUSG00000021282	ENSMUSG00000021282	Eif5	12:111538015-111546752	eukaryotic translation initiation factor 5 [Source:MGI Symbol;Acc:MGI:95309]	protein_coding	ENSG00000100664	EIF5	OK	237.53	284.788	0.261778	1.06477	0.2004	0.695721	no	261.159	0.261778	0.261778	2	0	0	OK	286.594	288.215	0.00813817	0.0316818	0.96975	0.995114	no	287.404	0.00813817	0.00813817	2	0	0
7616	ENSMUSG00000030057	ENSMUSG00000030057	Cnbp	6:87842614-87851106	cellular nucleic acid binding protein [Source:MGI Symbol;Acc:MGI:88431]	protein_coding	ENSG00000169714	CNBP	OK	625.327	632.294	0.0159861	0.0831586	0.9204	0.993025	no	628.811	0.0159861	0.0159861	2	0	0	OK	318.363	287.002	-0.149609	-0.790989	0.35585	0.85958	no	302.683	-0.149609	0.149609	2	0	0
1174	ENSMUSG00000008475	ENSMUSG00000008475	Arpc5	1:152766541-152775597	actin related protein 2/3 complex, subunit 5 [Source:MGI Symbol;Acc:MGI:1915021]	protein_coding	ENSG00000162704	ARPC5	OK	225.852	249.015	0.140856	0.730111	0.3738	0.874645	no	237.433	0.140856	0.140856	2	0	0	OK	317.494	286.629	-0.147542	-0.7562	0.37115	0.872481	no	302.062	-0.147542	0.147542	2	0	0
3952	ENSMUSG00000022884	ENSMUSG00000022884	Eif4a2	16:23107443-23127737	eukaryotic translation initiation factor 4A2 [Source:MGI Symbol;Acc:MGI:106906]	protein_coding	ENSG00000156976	EIF4A2	OK	302.561	317.762	0.0707184	0.239594	0.77895	0.99264	no	310.161	0.0707184	0.0707184	2	0	0	OK	293.881	285.022	-0.0441605	-0.162808	0.84235	0.992781	no	289.452	-0.0441605	0.0441605	2	0	0
6813	ENSMUSG00000028646	ENSMUSG00000028646	Rragc	4:123917445-123936997	Ras-related GTP binding C [Source:MGI Symbol;Acc:MGI:1858751]	protein_coding	ENSG00000116954	RRAGC	OK	41.0149	40.6916	-0.0114162	-0.056808	0.9438	0.994117	no	40.8533	-0.0114162	0.0114162	2	0	0	OK	313.151	284.373	-0.139076	-0.669011	0.4051	0.895911	no	298.762	-0.139076	0.139076	2	0	0
4847	ENSMUSG00000025068	ENSMUSG00000025068	Gsto1	19:47736856-47919299	glutathione S-transferase omega 1 [Source:MGI Symbol;Acc:MGI:1342273]	protein_coding	ENSG00000148834	GSTO1	OK	113.399	159.361	0.490888	1.63134	0.055	0.379803	no	136.38	0.490888	0.490888	2	0	0	OK	298.237	283.657	-0.0723114	-0.248748	0.76525	0.99264	no	290.947	-0.0723114	0.0723114	2	0	0
690	ENSMUSG00000004285	ENSMUSG00000004285	Atp6v1f	6:29467717-29470512	ATPase, H+ transporting, lysosomal V1 subunit F [Source:MGI Symbol;Acc:MGI:1913394]	protein_coding	ENSG00000128524	ATP6V1F	OK	155.382	161.854	0.0588696	0.299794	0.7251	0.99009	no	158.618	0.0588696	0.0588696	2	0	0	OK	245.831	282.447	0.200318	1.05402	0.21925	0.720831	no	264.139	0.200318	0.200318	2	0	0
17605	ENSMUSG00000063015	ENSMUSG00000063015	Ccni	5:93181932-93206495	cyclin I [Source:MGI Symbol;Acc:MGI:1341077]	protein_coding	ENSG00000118816	CCNI	OK	124.874	115.688	-0.110242	-0.467791	0.55775	0.961414	no	120.281	-0.110242	0.110242	2	0	0	OK	248.591	280.743	0.175476	0.769485	0.32385	0.833065	no	264.667	0.175476	0.175476	2	0	0
11196	ENSMUSG00000038587	ENSMUSG00000038587	Akap12	10:4266379-4359470	A kinase (PRKA) anchor protein (gravin) 12 [Source:MGI Symbol;Acc:MGI:1932576]	protein_coding	ENSG00000131016	AKAP12	OK	9.59043	13.7025	0.514767	2.55726	0.0033	0.0593117	no	11.6465	0.514767	0.514767	2	0	0	OK	377.297	280.652	-0.426922	-2.23493	0.00885	0.118655	no	328.975	-0.426922	0.426922	2	0	0
11221	ENSMUSG00000038642	ENSMUSG00000038642	Ctss	3:95526785-95556403	cathepsin S [Source:MGI Symbol;Acc:MGI:107341]	protein_coding	ENSG00000163131	CTSS	OK	90.6603	100.538	0.149198	0.783646	0.3556	0.859391	no	95.5992	0.149198	0.149198	2	0	0	OK	279.66	280.637	0.00502936	0.0272625	0.97455	0.995525	no	280.149	0.00502936	0.00502936	2	0	0
12648	ENSMUSG00000042625	ENSMUSG00000042625	Safb2	17:56560964-56584585	scaffold attachment factor B2 [Source:MGI Symbol;Acc:MGI:2146808]	protein_coding	ENSG00000130254	SAFB2	OK	127.983	143.999	0.170106	0.668017	0.4297	0.911319	no	135.991	0.170106	0.170106	2	0	0	OK	244.355	279.875	0.195805	0.7838	0.35145	0.856987	no	262.115	0.195805	0.195805	2	0	0
8518	ENSMUSG00000031708	ENSMUSG00000031708	Tecr	8:83571697-83607971	trans-2,3-enoyl-CoA reductase [Source:MGI Symbol;Acc:MGI:1915408]	protein_coding	ENSG00000099797	TECR	OK	409.893	440.952	0.105375	0.462962	0.5833	0.968722	no	425.423	0.105375	0.105375	2	0	0	OK	214.914	278.089	0.371787	1.68157	0.0508	0.362331	no	246.501	0.371787	0.371787	2	0	0
19457	ENSMUSG00000068882	ENSMUSG00000068882	Ssb	2:69861561-69885615	Sjogren syndrome antigen B [Source:MGI Symbol;Acc:MGI:98423]	protein_coding	ENSG00000138385	SSB	OK	406.436	444.438	0.128951	0.614247	0.4711	0.931697	no	425.437	0.128951	0.128951	2	0	0	OK	307.792	276.943	-0.152363	-0.710379	0.39835	0.892432	no	292.367	-0.152363	0.152363	2	0	0
4393	ENSMUSG00000024248	ENSMUSG00000024248	Cox7a2l	17:83501917-83517330	cytochrome c oxidase subunit 7A2 like [Source:MGI Symbol;Acc:MGI:106015]	protein_coding	ENSG00000115944	COX7A2L	OK	110.762	109.022	-0.0228474	-0.118079	0.8917	0.992805	no	109.892	-0.0228474	0.0228474	2	0	0	OK	240.218	276.79	0.204445	1.10726	0.193	0.68465	no	258.504	0.204445	0.204445	2	0	0
1848	ENSMUSG00000017760	ENSMUSG00000017760	Ctsa	2:164830731-164857711	cathepsin A [Source:MGI Symbol;Acc:MGI:97748]	protein_coding	ENSG00000064601	CTSA	OK	54.7359	63.6244	0.217094	0.691353	0.38285	0.880525	no	59.1801	0.217094	0.217094	2	0	0	OK	217.558	276.68	0.346819	1.14445	0.16285	0.636795	no	247.119	0.346819	0.346819	2	0	0
1070	ENSMUSG00000006932	ENSMUSG00000006932	Ctnnb1	9:120924451-121277197	catenin (cadherin associated protein), beta 1 [Source:MGI Symbol;Acc:MGI:88276]	protein_coding	ENSG00000168036	CTNNB1	OK	230.235	262.689	0.19025	0.810715	0.3429	0.850212	no	246.462	0.19025	0.19025	2	0	0	OK	289.259	276.394	-0.0656331	-0.269805	0.75235	0.99264	no	282.827	-0.0656331	0.0656331	2	0	0
17078	ENSMUSG00000060601	ENSMUSG00000060601	Nr1h2	7:44549615-44553951	nuclear receptor subfamily 1, group H, member 2 [Source:MGI Symbol;Acc:MGI:1352463]	protein_coding	ENSG00000131408	NR1H2	OK	112.472	124.367	0.14504	0.34564	0.6596	0.979768	no	118.419	0.14504	0.14504	2	0	0	OK	209.992	275.797	0.393272	0.892154	0.25725	0.765482	no	242.894	0.393272	0.393272	2	0	0
17340	ENSMUSG00000061904	ENSMUSG00000061904	Slc25a3	10:91116573-91124059	solute carrier family 25 (mitochondrial carrier, phosphate carrier), member 3 [Source:MGI Symbol;Acc:MGI:1353498]	protein_coding	ENSG00000075415	SLC25A3	OK	416.98	441.028	0.0808944	0.40301	0.6287	0.975415	no	429.004	0.0808944	0.0808944	2	0	0	OK	266.289	274.599	0.0443362	0.209081	0.806	0.992781	no	270.444	0.0443362	0.0443362	2	0	0
974	ENSMUSG00000006304	ENSMUSG00000006304	Arpc2	1:74236083-74268209	actin related protein 2/3 complex, subunit 2 [Source:MGI Symbol;Acc:MGI:1923959]	protein_coding	ENSG00000163466	ARPC2	OK	480.62	429.133	-0.163472	-0.901515	0.29165	0.802845	no	454.876	-0.163472	0.163472	2	0	0	OK	282.831	273.219	-0.0498849	-0.275282	0.75085	0.992469	no	278.025	-0.0498849	0.0498849	2	0	0
3380	ENSMUSG00000021939	ENSMUSG00000021939	Ctsb	14:63122461-63179578	cathepsin B [Source:MGI Symbol;Acc:MGI:88561]	protein_coding	ENSG00000164733	CTSB	OK	77.1961	80.8071	0.0659539	0.209516	0.8061	0.992781	no	79.0016	0.0659539	0.0659539	2	0	0	OK	292.336	273.071	-0.0983503	-0.344918	0.68715	0.984463	no	282.704	-0.0983503	0.0983503	2	0	0
4707	ENSMUSG00000024835	ENSMUSG00000024835	Coro1b	19:4148618-4163354	coronin, actin binding protein 1B [Source:MGI Symbol;Acc:MGI:1345963]	protein_coding	ENSG00000172725	CORO1B	OK	152.214	150.113	-0.0200502	-0.0816257	0.92435	0.993025	no	151.163	-0.0200502	0.0200502	2	0	0	OK	248.107	272.321	0.134346	0.569714	0.49725	0.941308	no	260.214	0.134346	0.134346	2	0	0
22945	ENSMUSG00000079641	ENSMUSG00000079641	Rpl39	X:37082519-37085402	ribosomal protein L39 [Source:MGI Symbol;Acc:MGI:1914498]	protein_coding	ENSG00000198918	RPL39	OK	878.712	701.859	-0.32421	-1.76498	0.03975	0.320054	no	790.285	-0.32421	0.32421	2	0	0	OK	232.999	272.007	0.22332	1.15915	0.17815	0.660676	no	252.503	0.22332	0.22332	2	0	0
2706	ENSMUSG00000020737	ENSMUSG00000020737	Jpt1	11:115497352-115514387	Jupiter microtubule associated homolog 1 [Source:MGI Symbol;Acc:MGI:1096361]	protein_coding	none	NA	OK	178.145	179.558	0.011402	0.055848	0.94525	0.994117	no	178.851	0.011402	0.011402	2	0	0	OK	273.437	271.745	-0.00895338	-0.0443411	0.9569	0.994937	no	272.591	-0.00895338	0.00895338	2	0	0
498	ENSMUSG00000002885	ENSMUSG00000002885	Adgre5	8:83715176-83741326	adhesion G protein-coupled receptor E5 [Source:MGI Symbol;Acc:MGI:1347095]	protein_coding	ENSG00000123146	ADGRE5	OK	35.0816	43.3638	0.305778	0.649645	0.37935	0.877642	no	39.2227	0.305778	0.305778	2	0	0	OK	269.152	270.899	0.00933329	0.0327025	0.9663	0.99505	no	270.025	0.00933329	0.00933329	2	0	0
4017	ENSMUSG00000023010	ENSMUSG00000023010	Tmbim6	15:99392881-99410049	transmembrane BAX inhibitor motif containing 6 [Source:MGI Symbol;Acc:MGI:99682]	protein_coding	ENSG00000139644	TMBIM6	OK	170.871	190.422	0.156293	0.772963	0.3467	0.852887	no	180.647	0.156293	0.156293	2	0	0	OK	246.724	270.494	0.132699	0.660839	0.413	0.900577	no	258.609	0.132699	0.132699	2	0	0
5435	ENSMUSG00000026234	ENSMUSG00000026234	Ncl	1:86344718-86359400	nucleolin [Source:MGI Symbol;Acc:MGI:97286]	protein_coding	ENSG00000115053	NCL	OK	1001.02	1060.93	0.0838497	0.275947	0.73105	0.990729	no	1030.97	0.0838497	0.0838497	2	0	0	OK	251.915	270.284	0.101542	0.36374	0.64945	0.978501	no	261.099	0.101542	0.101542	2	0	0
864	ENSMUSG00000005566	ENSMUSG00000005566	Trim28	7:12999113-13031035	tripartite motif-containing 28 [Source:MGI Symbol;Acc:MGI:109274]	protein_coding	ENSG00000130726	TRIM28	OK	527.256	614.706	0.221394	0.862795	0.3093	0.81933	no	570.981	0.221394	0.221394	2	0	0	OK	267.612	269.547	0.0103978	0.0421212	0.9589	0.994937	no	268.58	0.0103978	0.0103978	2	0	0
1016	ENSMUSG00000006498	ENSMUSG00000006498	Ptbp1	10:79851380-79883174	polypyrimidine tract binding protein 1 [Source:MGI Symbol;Acc:MGI:97791]	protein_coding	ENSG00000011304	PTBP1	OK	395.358	609.801	0.625179	1.9044	0.02055	0.209617	no	502.58	0.625179	0.625179	2	0	0	OK	232.437	269.216	0.211927	0.678107	0.4137	0.901268	no	250.827	0.211927	0.211927	2	0	0
6843	ENSMUSG00000028691	ENSMUSG00000028691	Prdx1	4:116685543-116700822	peroxiredoxin 1 [Source:MGI Symbol;Acc:MGI:99523]	protein_coding	ENSG00000117450	PRDX1	OK	503.822	538.689	0.0965374	0.440619	0.60735	0.973311	no	521.255	0.0965374	0.0965374	2	0	0	OK	373.017	268.611	-0.47372	-2.13141	0.01305	0.153771	no	320.814	-0.47372	0.47372	2	0	0
1046	ENSMUSG00000006699	ENSMUSG00000006699	Cdc42	4:137319695-137357720	cell division cycle 42 [Source:MGI Symbol;Acc:MGI:106211]	protein_coding	ENSG00000070831	CDC42	OK	179.802	194.513	0.113457	0.618508	0.46325	0.929598	no	187.157	0.113457	0.113457	2	0	0	OK	274.992	267.41	-0.0403356	-0.218016	0.7995	0.992781	no	271.201	-0.0403356	0.0403356	2	0	0
3014	ENSMUSG00000021270	ENSMUSG00000021270	Hsp90aa1	12:110690604-110702728	heat shock protein 90, alpha (cytosolic), class A member 1 [Source:MGI Symbol;Acc:MGI:96250]	protein_coding	ENSG00000080824	HSP90AA1	OK	756.783	879.327	0.21652	0.704807	0.4086	0.897854	no	818.055	0.21652	0.21652	2	0	0	OK	245.401	265.673	0.114511	0.355474	0.67665	0.98228	no	255.537	0.114511	0.114511	2	0	0
1436	ENSMUSG00000013593	ENSMUSG00000013593	Ndufs2	1:171234852-171260637	NADH:ubiquinone oxidoreductase core subunit S2 [Source:MGI Symbol;Acc:MGI:2385112]	protein_coding	ENSG00000158864	NDUFS2	OK	325.103	362.551	0.157287	0.807065	0.33915	0.846532	no	343.827	0.157287	0.157287	2	0	0	OK	231.857	263.875	0.186616	0.942441	0.2666	0.776191	no	247.866	0.186616	0.186616	2	0	0
10573	ENSMUSG00000037058	ENSMUSG00000037058	Paip2	18:35598616-35627244	polyadenylate-binding protein-interacting protein 2 [Source:MGI Symbol;Acc:MGI:1915119]	protein_coding	ENSG00000120727	PAIP2	OK	229.618	198.422	-0.210664	-1.00608	0.24465	0.752107	no	214.02	-0.210664	0.210664	2	0	0	OK	257.565	263.468	0.0326864	0.15522	0.85215	0.992781	no	260.517	0.0326864	0.0326864	2	0	0
31283	ENSMUSG00000090841	ENSMUSG00000090841	Myl6	10:128490859-128494145	myosin, light polypeptide 6, alkali, smooth muscle and non-muscle [Source:MGI Symbol;Acc:MGI:109318]	protein_coding	ENSG00000092841	MYL6	OK	247.892	276.936	0.159841	0.780004	0.35615	0.859773	no	262.414	0.159841	0.159841	2	0	0	OK	249.692	263.467	0.0774729	0.361885	0.67035	0.981943	no	256.579	0.0774729	0.0774729	2	0	0
15131	ENSMUSG00000051695	ENSMUSG00000051695	Pcbp1	6:86524491-86582466	poly(rC) binding protein 1 [Source:MGI Symbol;Acc:MGI:1345635]	protein_coding	ENSG00000169564	PCBP1	OK	292.301	330.248	0.176097	0.958391	0.2585	0.767218	no	311.274	0.176097	0.176097	2	0	0	OK	272.159	262.259	-0.053459	-0.286354	0.7349	0.991145	no	267.209	-0.053459	0.053459	2	0	0
8226	ENSMUSG00000031207	ENSMUSG00000031207	Msn	X:96096041-96168552	moesin [Source:MGI Symbol;Acc:MGI:97167]	protein_coding	ENSG00000147065	MSN	OK	172.83	208.917	0.273572	1.48216	0.0838	0.479593	no	190.874	0.273572	0.273572	2	0	0	OK	293.356	262.065	-0.162732	-0.872507	0.3019	0.811385	no	277.711	-0.162732	0.162732	2	0	0
7942	ENSMUSG00000030654	ENSMUSG00000030654	Arl6ip1	7:118118890-118129662	ADP-ribosylation factor-like 6 interacting protein 1 [Source:MGI Symbol;Acc:MGI:1858943]	protein_coding	ENSG00000170540	ARL6IP1	OK	256.191	220.127	-0.218883	-0.978932	0.2164	0.717366	no	238.159	-0.218883	0.218883	2	0	0	OK	283.021	261.558	-0.113777	-0.46754	0.54575	0.957226	no	272.289	-0.113777	0.113777	2	0	0
1396	ENSMUSG00000012405	ENSMUSG00000012405	Rpl15	14:18267822-18331859	ribosomal protein L15 [Source:MGI Symbol;Acc:MGI:1913730]	protein_coding	ENSG00000174748	RPL15	OK	600.589	568.44	-0.0793703	-0.340623	0.6891	0.984818	no	584.514	-0.0793703	0.0793703	2	0	0	OK	238.124	261.193	0.133407	0.490313	0.56125	0.962977	no	249.659	0.133407	0.133407	2	0	0
1115	ENSMUSG00000007656	ENSMUSG00000007656	Arpp19	9:75037613-75060313	cAMP-regulated phosphoprotein 19 [Source:MGI Symbol;Acc:MGI:1891691]	protein_coding	ENSG00000128989	ARPP19	OK	341.048	431.688	0.340016	0.989557	0.235	0.740352	no	386.368	0.340016	0.340016	2	0	0	OK	244.064	260.569	0.0944051	0.226288	0.78165	0.992697	no	252.317	0.0944051	0.0944051	2	0	0
1737	ENSMUSG00000016554	ENSMUSG00000016554	Eif3d	15:77958997-77970813	eukaryotic translation initiation factor 3, subunit D [Source:MGI Symbol;Acc:MGI:1933181]	protein_coding	ENSG00000100353	EIF3D	OK	389.394	399.284	0.0361843	0.072061	0.9327	0.993661	no	394.339	0.0361843	0.0361843	2	0	0	OK	203.008	259.904	0.356438	0.692815	0.4136	0.901189	no	231.456	0.356438	0.356438	2	0	0
5860	ENSMUSG00000026956	ENSMUSG00000026956	Uap1l1	2:25359888-25365682	UDP-N-acteylglucosamine pyrophosphorylase 1-like 1 [Source:MGI Symbol;Acc:MGI:2443318]	protein_coding	ENSG00000197355	UAP1L1	OK	37.3627	27.2378	-0.45599	-1.26443	0.1383	0.599714	no	32.3002	-0.45599	0.45599	2	0	0	OK	192.724	259.6	0.429759	1.44276	0.09165	0.50245	no	226.162	0.429759	0.429759	2	0	0
8143	ENSMUSG00000031029	ENSMUSG00000031029	Eif3f	7:108934416-108942951	eukaryotic translation initiation factor 3, subunit F [Source:MGI Symbol;Acc:MGI:1913335]	protein_coding	ENSG00000175390	EIF3F	OK	335.875	304.822	-0.139956	-0.484755	0.5554	0.960558	no	320.349	-0.139956	0.139956	2	0	0	OK	222.007	259.089	0.222843	0.753339	0.3717	0.872937	no	240.548	0.222843	0.222843	2	0	0
7588	ENSMUSG00000030007	ENSMUSG00000030007	Cct7	6:85446809-85468475	chaperonin containing Tcp1, subunit 7 (eta) [Source:MGI Symbol;Acc:MGI:107184]	protein_coding	ENSG00000135624	CCT7	OK	730.451	724.71	-0.0113847	-0.0208973	0.97955	0.996066	no	727.581	-0.0113847	0.0113847	2	0	0	OK	300.824	257.245	-0.225776	-0.410074	0.62615	0.975017	no	279.034	-0.225776	0.225776	2	0	0
15222	ENSMUSG00000052142	ENSMUSG00000052142	Rasal3	17:32390658-32424167	RAS protein activator like 3 [Source:MGI Symbol;Acc:MGI:2444128]	protein_coding	ENSG00000105122	RASAL3	OK	138.384	125.136	-0.145182	-0.371254	0.66245	0.980083	no	131.76	-0.145182	0.145182	2	0	0	OK	240.284	256.86	0.0962431	0.26764	0.74665	0.992469	no	248.572	0.0962431	0.0962431	2	0	0
4794	ENSMUSG00000024978	ENSMUSG00000024978	Gpam	19:55067267-55127238	glycerol-3-phosphate acyltransferase, mitochondrial [Source:MGI Symbol;Acc:MGI:109162]	protein_coding	ENSG00000119927	GPAM	OK	9.69196	13.6746	0.49664	2.48062	0.003	0.0551316	no	11.6833	0.49664	0.49664	2	0	0	OK	259.309	256.412	-0.0162093	-0.0858628	0.92055	0.993025	no	257.861	-0.0162093	0.0162093	2	0	0
14109	ENSMUSG00000047867	ENSMUSG00000047867	Gimap6	6:48701581-48708225	GTPase, IMAP family member 6 [Source:MGI Symbol;Acc:MGI:1918876]	protein_coding	ENSG00000133561	GIMAP6	OK	123.99	104.183	-0.2511	-1.06288	0.19195	0.683073	no	114.087	-0.2511	0.2511	2	0	0	OK	327.656	255.385	-0.359513	-1.58062	0.04675	0.348144	no	291.52	-0.359513	0.359513	2	0	0
2486	ENSMUSG00000020390	ENSMUSG00000020390	Ube2b	11:51949881-52286179	ubiquitin-conjugating enzyme E2B [Source:MGI Symbol;Acc:MGI:102944]	protein_coding	ENSG00000119048	UBE2B	OK	93.8288	90.3996	-0.0537141	-0.0918282	0.9111	0.992805	no	92.1142	-0.0537141	0.0537141	2	0	0	OK	232.144	255.29	0.137121	0.335056	0.6834	0.98397	no	243.717	0.137121	0.137121	2	0	0
12568	ENSMUSG00000042406	ENSMUSG00000042406	Atf4	15:80255183-80257541	activating transcription factor 4 [Source:MGI Symbol;Acc:MGI:88096]	protein_coding	ENSG00000128272	ATF4	OK	270.298	206.901	-0.385607	-2.00042	0.02015	0.206582	no	238.6	-0.385607	0.385607	2	0	0	OK	187.435	255.067	0.444487	2.34357	0.00525	0.0833881	no	221.251	0.444487	0.444487	2	0	0
6711	ENSMUSG00000028478	ENSMUSG00000028478	Clta	4:44004451-44032846	clathrin, light polypeptide (Lca) [Source:MGI Symbol;Acc:MGI:894297]	protein_coding	ENSG00000122705	CLTA	OK	211.144	239.076	0.179244	0.965279	0.25715	0.765467	no	225.11	0.179244	0.179244	2	0	0	OK	236.524	254.988	0.108442	0.58854	0.49015	0.937717	no	245.756	0.108442	0.108442	2	0	0
3539	ENSMUSG00000022205	ENSMUSG00000022205	Sub1	15:11981338-11996983	SUB1 homolog (S. cerevisiae) [Source:MGI Symbol;Acc:MGI:104811]	protein_coding	ENSG00000113387	SUB1	OK	588.175	523.781	-0.167279	-0.836207	0.32635	0.835012	no	555.978	-0.167279	0.167279	2	0	0	OK	319.936	254.495	-0.330145	-1.61734	0.05745	0.390461	no	287.216	-0.330145	0.330145	2	0	0
8433	ENSMUSG00000031557	ENSMUSG00000031557	Plekha2	8:25024928-25109986	pleckstrin homology domain-containing, family A (phosphoinositide binding specific) member 2 [Source:MGI Symbol;Acc:MGI:1928144]	protein_coding	ENSG00000169499	PLEKHA2	OK	77.5092	75.7713	-0.0327172	-0.14881	0.8464	0.992781	no	76.6403	-0.0327172	0.0327172	2	0	0	OK	233.247	254.402	0.125253	0.410105	0.48325	0.935108	no	243.825	0.125253	0.125253	2	0	0
14915	ENSMUSG00000050912	ENSMUSG00000050912	Tmem123	9:7764040-7794333	transmembrane protein 123 [Source:MGI Symbol;Acc:MGI:1919179]	protein_coding	ENSG00000152558	TMEM123	OK	74.5881	76.9843	0.045619	0.234413	0.7755	0.99264	no	75.7862	0.045619	0.045619	2	0	0	OK	345.337	254.231	-0.441867	-2.35509	0.00435	0.0725231	no	299.784	-0.441867	0.441867	2	0	0
3957	ENSMUSG00000022890	ENSMUSG00000022890	Atp5j	16:84827865-84863779	ATP synthase, H+ transporting, mitochondrial F0 complex, subunit F [Source:MGI Symbol;Acc:MGI:107777]	protein_coding	ENSG00000154723	ATP5PF	OK	530.987	565.397	0.090589	0.199175	0.80885	0.992781	no	548.192	0.090589	0.090589	2	0	0	OK	270.751	252.266	-0.102022	-0.184781	0.8143	0.992781	no	261.508	-0.102022	0.102022	2	0	0
1084	ENSMUSG00000007041	ENSMUSG00000007041	Clic1	17:35049965-35058749	chloride intracellular channel 1 [Source:MGI Symbol;Acc:MGI:2148924]	protein_coding	ENSG00000213719	CLIC1	OK	239.807	242.112	0.013801	0.0749399	0.92845	0.993025	no	240.959	0.013801	0.013801	2	0	0	OK	204.89	251.914	0.298086	1.61212	0.05835	0.394203	no	228.402	0.298086	0.298086	2	0	0
7485	ENSMUSG00000029723	ENSMUSG00000029723	Tsc22d4	5:137745729-137768450	TSC22 domain family, member 4 [Source:MGI Symbol;Acc:MGI:1926079]	protein_coding	ENSG00000166925	TSC22D4	OK	182.503	183.489	0.00776755	0.0260598	0.9735	0.995525	no	182.996	0.00776755	0.00776755	2	0	0	OK	224.843	251.266	0.160299	0.538003	0.5236	0.95038	no	238.054	0.160299	0.160299	2	0	0
15149	ENSMUSG00000051768	ENSMUSG00000051768	Xrcc1	7:24546288-24573440	X-ray repair complementing defective repair in Chinese hamster cells 1 [Source:MGI Symbol;Acc:MGI:99137]	protein_coding	ENSG00000073050	XRCC1	OK	142.397	141.252	-0.0116541	-0.0443357	0.9604	0.995028	no	141.825	-0.0116541	0.0116541	2	0	0	OK	187.255	250.695	0.420926	1.6804	0.04945	0.358826	no	218.975	0.420926	0.420926	2	0	0
8090	ENSMUSG00000030894	ENSMUSG00000030894	Tpp1	7:105744810-105752235	tripeptidyl peptidase I [Source:MGI Symbol;Acc:MGI:1336194]	protein_coding	ENSG00000166340	TPP1	OK	18.2576	20.8667	0.192702	0.516073	0.51245	0.946673	no	19.5622	0.192702	0.192702	2	0	0	OK	203.057	250.276	0.301638	1.07507	0.1666	0.642595	no	226.666	0.301638	0.301638	2	0	0
4437	ENSMUSG00000024335	ENSMUSG00000024335	Brd2	17:34112022-34139101	bromodomain containing 2 [Source:MGI Symbol;Acc:MGI:99495]	protein_coding	ENSG00000204256	BRD2	OK	180.595	192.569	0.0926186	0.336624	0.67635	0.98228	no	186.582	0.0926186	0.0926186	2	0	0	OK	278.428	250.005	-0.155343	-0.570013	0.47965	0.934294	no	264.216	-0.155343	0.155343	2	0	0
8165	ENSMUSG00000031101	ENSMUSG00000031101	Sash3	X:48146435-48161565	SAM and SH3 domain containing 3 [Source:MGI Symbol;Acc:MGI:1921381]	protein_coding	ENSG00000122122	SASH3	OK	67.8202	59.5903	-0.186637	-1.00074	0.2449	0.752301	no	63.7052	-0.186637	0.186637	2	0	0	OK	267.646	249.593	-0.100751	-0.55509	0.5167	0.948314	no	258.62	-0.100751	0.100751	2	0	0
8966	ENSMUSG00000032436	ENSMUSG00000032436	Cmtm7	9:114756835-114782257	CKLF-like MARVEL transmembrane domain containing 7 [Source:MGI Symbol;Acc:MGI:2447166]	protein_coding	ENSG00000153551	CMTM7	OK	306.481	313.941	0.034695	0.187323	0.8254	0.992781	no	310.211	0.034695	0.034695	2	0	0	OK	240.39	249.21	0.0519831	0.273286	0.741	0.992292	no	244.8	0.0519831	0.0519831	2	0	0
8206	ENSMUSG00000031167	ENSMUSG00000031167	Rbm3	X:8138974-8147964	RNA binding motif (RNP1, RRM) protein 3 [Source:MGI Symbol;Acc:MGI:1099460]	protein_coding	ENSG00000102317	RBM3	OK	296.392	399.652	0.431238	2.34638	0.0064	0.0968549	no	348.022	0.431238	0.431238	2	0	0	OK	222.006	248.643	0.163476	0.867161	0.30465	0.814894	no	235.325	0.163476	0.163476	2	0	0
1137	ENSMUSG00000007891	ENSMUSG00000007891	Ctsd	7:142325836-142388038	cathepsin D [Source:MGI Symbol;Acc:MGI:88562]	protein_coding	NA	NA	OK	41.3728	42.9092	0.052604	0.243767	0.777	0.99264	no	42.141	0.052604	0.052604	2	0	0	OK	216.575	248.559	0.198723	1.02051	0.2316	0.736343	no	232.567	0.198723	0.198723	2	0	0
5320	ENSMUSG00000026034	ENSMUSG00000026034	Clk1	1:58410188-58424066	CDC-like kinase 1 [Source:MGI Symbol;Acc:MGI:107403]	protein_coding	ENSG00000013441	CLK1	OK	70.2099	92.4822	0.397501	1.55919	0.0637	0.415519	no	81.3461	0.397501	0.397501	2	0	0	OK	276.752	248.343	-0.156258	-0.659908	0.426	0.909173	no	262.548	-0.156258	0.156258	2	0	0
19291	ENSMUSG00000068039	ENSMUSG00000068039	Tcp1	17:12911348-12940600	t-complex protein 1 [Source:MGI Symbol;Acc:MGI:98535]	protein_coding	ENSG00000120438	TCP1	OK	578.104	581.405	0.00821285	0.0342576	0.9682	0.99505	no	579.755	0.00821285	0.00821285	2	0	0	OK	250.214	246.827	-0.0196594	-0.0801502	0.92175	0.993025	no	248.52	-0.0196594	0.0196594	2	0	0
2628	ENSMUSG00000020629	ENSMUSG00000020629	Adi1	12:28675230-28682175	acireductone dioxygenase 1 [Source:MGI Symbol;Acc:MGI:2144929]	protein_coding	ENSG00000182551	ADI1	OK	48.9246	53.1884	0.120552	0.565609	0.50285	0.942987	no	51.0565	0.120552	0.120552	2	0	0	OK	218.167	246.708	0.17737	0.898677	0.29135	0.80245	no	232.438	0.17737	0.17737	2	0	0
4301	ENSMUSG00000024104	ENSMUSG00000024104	Washc2	6:116208037-116264095	WASH complex subunit 2` [Source:MGI Symbol;Acc:MGI:106463]	protein_coding	NA	NA	OK	28.8226	36.5053	0.340903	0.960491	0.23295	0.737594	no	32.6639	0.340903	0.340903	2	0	0	OK	187.114	244.894	0.388235	1.21699	0.1193	0.570441	no	216.004	0.388235	0.388235	2	0	0
636	ENSMUSG00000003814	ENSMUSG00000003814	Calr	8:84841849-84846934	calreticulin [Source:MGI Symbol;Acc:MGI:88252]	protein_coding	ENSG00000179218	CALR	OK	462.914	673.648	0.541249	2.65307	0.0012	0.0273763	yes	568.281	0.541249	0.541249	2	0	0	OK	276.47	244.476	-0.177426	-0.860381	0.3099	0.819726	no	260.473	-0.177426	0.177426	2	0	0
1567	ENSMUSG00000015165	ENSMUSG00000015165	Hnrnpl	7:28808540-28822266	heterogeneous nuclear ribonucleoprotein L [Source:MGI Symbol;Acc:MGI:104816]	protein_coding	ENSG00000104824	HNRNPL	OK	278.767	337.857	0.277351	1.24066	0.1437	0.603969	no	308.312	0.277351	0.277351	2	0	0	OK	249.462	244.166	-0.0309564	-0.133321	0.86665	0.992781	no	246.814	-0.0309564	0.0309564	2	0	0
303	ENSMUSG00000001729	ENSMUSG00000001729	Akt1	12:112653820-112674884	thymoma viral proto-oncogene 1 [Source:MGI Symbol;Acc:MGI:87986]	protein_coding	ENSG00000142208	AKT1	OK	110.281	147.874	0.423186	1.77669	0.01785	0.190119	no	129.077	0.423186	0.423186	2	0	0	OK	231.717	243.041	0.0688383	0.263623	0.7086	0.987419	no	237.379	0.0688383	0.0688383	2	0	0
6554	ENSMUSG00000028211	ENSMUSG00000028211	Trp53inp1	4:11156430-11174379	transformation related protein 53 inducible nuclear protein 1 [Source:MGI Symbol;Acc:MGI:1926609]	protein_coding	ENSG00000164938	TP53INP1	OK	15.5494	14.3088	-0.119952	-0.574859	0.4801	0.93459	no	14.9291	-0.119952	0.119952	2	0	0	OK	314.822	241.884	-0.380217	-1.87226	0.0186	0.195524	no	278.353	-0.380217	0.380217	2	0	0
7174	ENSMUSG00000029217	ENSMUSG00000029217	Tec	5:72755715-72868483	tec protein tyrosine kinase [Source:MGI Symbol;Acc:MGI:98662]	protein_coding	ENSG00000135605	TEC	OK	34.2515	26.6945	-0.359627	-1.53932	0.04865	0.356135	no	30.473	-0.359627	0.359627	2	0	0	OK	205.319	241.167	0.232166	1.2158	0.1346	0.597519	no	223.243	0.232166	0.232166	2	0	0
2773	ENSMUSG00000020849	ENSMUSG00000020849	Ywhae	11:75732868-75765845	tyrosine 3-monooxygenase/tryptophan 5-monooxygenase activation protein, epsilon polypeptide [Source:MGI Symbol;Acc:MGI:894689]	protein_coding	ENSG00000108953	YWHAE	OK	391.179	468.427	0.259995	0.986625	0.2455	0.75316	no	429.803	0.259995	0.259995	2	0	0	OK	226.523	240.979	0.089251	0.333807	0.69495	0.985532	no	233.751	0.089251	0.089251	2	0	0
19422	ENSMUSG00000068735	ENSMUSG00000068735	Trp53i11	2:93187547-93201759	transformation related protein 53 inducible protein 11 [Source:MGI Symbol;Acc:MGI:2670995]	protein_coding	ENSG00000175274	TP53I11	OK	115.489	123.475	0.0964714	0.480388	0.5577	0.961414	no	119.482	0.0964714	0.0964714	2	0	0	OK	263.759	240.859	-0.131034	-0.645587	0.4275	0.909903	no	252.309	-0.131034	0.131034	2	0	0
3755	ENSMUSG00000022552	ENSMUSG00000022552	Sharpin	15:76347039-76351111	SHANK-associated RH domain interacting protein [Source:MGI Symbol;Acc:MGI:1913331]	protein_coding	ENSG00000179526	SHARPIN	OK	132.453	138.022	0.0594245	0.221286	0.7932	0.992781	no	135.238	0.0594245	0.0594245	2	0	0	OK	239.367	240.751	0.00832169	0.030772	0.97215	0.995491	no	240.059	0.00832169	0.00832169	2	0	0
9722	ENSMUSG00000034566	ENSMUSG00000034566	Atp5h	11:115415688-115419962	ATP synthase, H+ transporting, mitochondrial F0 complex, subunit D [Source:MGI Symbol;Acc:MGI:1918929]	protein_coding	ENSG00000167863	ATP5PD	OK	450.95	486.21	0.108615	0.563633	0.51325	0.94688	no	468.58	0.108615	0.108615	2	0	0	OK	240.415	240.563	0.000891877	0.00435311	0.9965	0.998907	no	240.489	0.000891877	0.000891877	2	0	0
14565	ENSMUSG00000049577	ENSMUSG00000049577	Zfpm1	8:119910359-124345724	zinc finger protein, multitype 1 [Source:MGI Symbol;Acc:MGI:1095400]	protein_coding	ENSG00000179588	ZFPM1	OK	71.978	79.4812	0.143056	0.0631855	0.86895	0.992781	no	75.7296	0.143056	0.143056	2	0	0	OK	221.578	240.441	0.117871	0.0924383	0.8767	0.992781	no	231.01	0.117871	0.117871	2	0	0
33101	ENSMUSG00000093989	ENSMUSG00000093989	Rnasek	11:70235205-70239842	ribonuclease, RNase K [Source:MGI Symbol;Acc:MGI:106369]	protein_coding	NA	NA	OK	87.2072	85.3145	-0.031657	-0.109635	0.8968	0.992805	no	86.2609	-0.031657	0.031657	2	0	0	OK	209.035	240.296	0.201067	0.927148	0.27865	0.789784	no	224.666	0.201067	0.201067	2	0	0
7315	ENSMUSG00000029455	ENSMUSG00000029455	Aldh2	5:121566026-121595908	aldehyde dehydrogenase 2, mitochondrial [Source:MGI Symbol;Acc:MGI:99600]	protein_coding	NA	NA	OK	167.262	167.826	0.00485374	0.0213268	0.98125	0.996086	no	167.544	0.00485374	0.00485374	2	0	0	OK	192.473	236.797	0.298996	1.33316	0.1188	0.569695	no	214.635	0.298996	0.298996	2	0	0
6134	ENSMUSG00000027465	ENSMUSG00000027465	Tbc1d20	2:152293827-152313996	TBC1 domain family, member 20 [Source:MGI Symbol;Acc:MGI:1914481]	protein_coding	ENSG00000125875	TBC1D20	OK	20.8297	23.8595	0.195921	0.78542	0.2803	0.791529	no	22.3446	0.195921	0.195921	2	0	0	OK	219.287	234.881	0.0991099	0.450328	0.53855	0.955578	no	227.084	0.0991099	0.0991099	2	0	0
2277	ENSMUSG00000020048	ENSMUSG00000020048	Hsp90b1	10:86685524-86705509	heat shock protein 90, beta (Grp94), member 1 [Source:MGI Symbol;Acc:MGI:98817]	protein_coding	ENSG00000166598	HSP90B1	OK	444.834	652.877	0.553546	1.11435	0.1153	0.561938	no	548.856	0.553546	0.553546	2	0	0	OK	341.445	234.585	-0.541539	-0.945506	0.23515	0.740411	no	288.015	-0.541539	0.541539	2	0	0
318	ENSMUSG00000001794	ENSMUSG00000001794	Capns1	7:30186935-30200889	calpain, small subunit 1 [Source:MGI Symbol;Acc:MGI:88266]	protein_coding	ENSG00000126247	CAPNS1	OK	197.867	207.363	0.0676253	0.301995	0.72085	0.989023	no	202.615	0.0676253	0.0676253	2	0	0	OK	233.532	234.046	0.00316971	0.0143973	0.98555	0.997088	no	233.789	0.00316971	0.00316971	2	0	0
2320	ENSMUSG00000020111	ENSMUSG00000020111	Micu1	10:59702476-59864132	mitochondrial calcium uptake 1 [Source:MGI Symbol;Acc:MGI:2384909]	protein_coding	ENSG00000107745	MICU1	OK	20.7568	26.3875	0.346268	0.829367	0.3054	0.815431	no	23.5722	0.346268	0.346268	2	0	0	OK	217.534	233.412	0.101636	0.307464	0.7145	0.988138	no	225.473	0.101636	0.101636	2	0	0
2874	ENSMUSG00000021025	ENSMUSG00000021025	Nfkbia	12:55489409-55492647	nuclear factor of kappa light polypeptide gene enhancer in B cells inhibitor, alpha [Source:MGI Symbol;Acc:MGI:104741]	protein_coding	ENSG00000100906	NFKBIA	OK	35.1103	27.6369	-0.345298	-1.41597	0.0953	0.511817	no	31.3736	-0.345298	0.345298	2	0	0	OK	221.864	232.75	0.0691029	0.344591	0.68315	0.983938	no	227.307	0.0691029	0.0691029	2	0	0
12107	ENSMUSG00000040945	ENSMUSG00000040945	Rcc2	4:140700540-140723220	regulator of chromosome condensation 2 [Source:MGI Symbol;Acc:MGI:1919784]	protein_coding	ENSG00000179051	RCC2	OK	282.8	373.661	0.401949	0.880345	0.2687	0.778564	no	328.231	0.401949	0.401949	2	0	0	OK	178.512	232.149	0.379028	0.817374	0.3182	0.827939	no	205.331	0.379028	0.379028	2	0	0
10120	ENSMUSG00000035697	ENSMUSG00000035697	Arhgap45	10:80016652-80031472	Rho GTPase activating protein 45 [Source:MGI Symbol;Acc:MGI:1917969]	protein_coding	ENSG00000180448	ARHGAP45	OK	72.0774	79.6207	0.143597	0.772176	0.3671	0.869518	no	75.8491	0.143597	0.143597	2	0	0	OK	212.355	231.062	0.121799	0.661488	0.44255	0.918338	no	221.709	0.121799	0.121799	2	0	0
9558	ENSMUSG00000034120	ENSMUSG00000034120	Srsf2	11:116837431-116875635	serine/arginine-rich splicing factor 2 [Source:MGI Symbol;Acc:MGI:98284]	protein_coding	ENSG00000161547	SRSF2	OK	388.668	492.671	0.342088	1.17429	0.16385	0.638316	no	440.669	0.342088	0.342088	2	0	0	OK	228.592	230.675	0.0130888	0.0372135	0.96515	0.99505	no	229.634	0.0130888	0.0130888	2	0	0
22830	ENSMUSG00000079426	ENSMUSG00000079426	Arpc4	6:113378114-113414587	actin related protein 2/3 complex, subunit 4 [Source:MGI Symbol;Acc:MGI:1915339]	protein_coding	ENSG00000241553	ARPC4	OK	292.738	336.686	0.201794	1.02216	0.2287	0.732572	no	314.712	0.201794	0.201794	2	0	0	OK	197.677	230.095	0.219084	1.05422	0.2195	0.721034	no	213.886	0.219084	0.219084	2	0	0
2089	ENSMUSG00000019432	ENSMUSG00000019432	Ddx39b	17:35241745-35253707	DEAD (Asp-Glu-Ala-Asp) box polypeptide 39B [Source:MGI Symbol;Acc:MGI:99240]	protein_coding	ENSG00000198563	DDX39B	OK	252.521	314.199	0.315273	1.73606	0.03995	0.32116	no	283.36	0.315273	0.315273	2	0	0	OK	215.234	229.64	0.0934708	0.513095	0.55085	0.959339	no	222.437	0.0934708	0.0934708	2	0	0
1993	ENSMUSG00000018770	ENSMUSG00000018770	Atp5g3	2:73908446-73911326	ATP synthase, H+ transporting, mitochondrial F0 complex, subunit C3 (subunit 9) [Source:MGI Symbol;Acc:MGI:2442035]	protein_coding	ENSG00000154518	ATP5MC3	OK	558.569	669.538	0.261431	1.42576	0.0953	0.511817	no	614.053	0.261431	0.261431	2	0	0	OK	250.369	229.595	-0.124965	-0.657214	0.44165	0.917585	no	239.982	-0.124965	0.124965	2	0	0
13776	ENSMUSG00000046711	ENSMUSG00000046711	Hmga1	17:27545706-27566222	high mobility group AT-hook 1 [Source:MGI Symbol;Acc:MGI:96160]	protein_coding	NA	NA	OK	182.293	233.848	0.359314	1.60023	0.0609	0.404838	no	208.071	0.359314	0.359314	2	0	0	OK	241.559	229.485	-0.0739727	-0.334635	0.6989	0.985729	no	235.522	-0.0739727	0.0739727	2	0	0
5157	ENSMUSG00000025724	ENSMUSG00000025724	Sec11a	7:80902226-80947780	SEC11 homolog A, signal peptidase complex subunit [Source:MGI Symbol;Acc:MGI:1929464]	protein_coding	ENSG00000140612	SEC11A	OK	177.375	194.201	0.13075	0.622848	0.46365	0.929614	no	185.788	0.13075	0.13075	2	0	0	OK	213.925	229.108	0.0989233	0.46965	0.5799	0.967552	no	221.517	0.0989233	0.0989233	2	0	0
941	ENSMUSG00000006024	ENSMUSG00000006024	Napa	7:16098457-16117975	N-ethylmaleimide sensitive fusion protein attachment protein alpha [Source:MGI Symbol;Acc:MGI:104563]	protein_coding	ENSG00000105402	NAPA	OK	133.319	126.089	-0.0804486	-0.27977	0.7431	0.992462	no	129.704	-0.0804486	0.0804486	2	0	0	OK	187.453	228.772	0.287379	1.04048	0.21495	0.715622	no	208.113	0.287379	0.287379	2	0	0
2472	ENSMUSG00000020368	ENSMUSG00000020368	Canx	11:50293960-50325673	calnexin [Source:MGI Symbol;Acc:MGI:88261]	protein_coding	ENSG00000127022	CANX	OK	238.048	321.374	0.433003	1.55039	0.05695	0.388325	no	279.711	0.433003	0.433003	2	0	0	OK	216.887	228.653	0.0762144	0.286166	0.73745	0.991834	no	222.77	0.0762144	0.0762144	2	0	0
6097	ENSMUSG00000027405	ENSMUSG00000027405	Nop56	2:130274429-130284547	NOP56 ribonucleoprotein [Source:MGI Symbol;Acc:MGI:1914384]	protein_coding	ENSG00000101361	NOP56	OK	657.35	685.354	0.0601876	0.17981	0.82885	0.992781	no	671.352	0.0601876	0.0601876	2	0	0	OK	225.161	228.417	0.0207134	0.056413	0.946	0.994117	no	226.789	0.0207134	0.0207134	2	0	0
3575	ENSMUSG00000022255	ENSMUSG00000022255	Mtdh	15:34082693-34145624	metadherin [Source:MGI Symbol;Acc:MGI:1914404]	protein_coding	ENSG00000147649	MTDH	OK	366.278	308.324	-0.248493	-0.97221	0.2351	0.740411	no	337.301	-0.248493	0.248493	2	0	0	OK	280.708	226.216	-0.311375	-1.17654	0.14585	0.606558	no	253.462	-0.311375	0.311375	2	0	0
54255	ENSMUSG00000117098	ENSMUSG00000117098	Myl12b	17:70853766-71475343	Myosin regulatory light chain 12B [Source:UniProtKB/Swiss-Prot;Acc:Q3THE2]	protein_coding	NA	NA	OK	169.547	217.182	0.357223	0.720111	0.3947	0.889482	no	193.364	0.357223	0.357223	2	0	0	OK	89.8657	225.529	1.32747	1.98628	0.0292	0.263585	no	157.697	1.32747	1.32747	2	1	0
6101	ENSMUSG00000027411	ENSMUSG00000027411	Vps16	2:130417246-130444269	VSP16 CORVET/HOPS core subunit [Source:MGI Symbol;Acc:MGI:2136772]	protein_coding	ENSG00000215305	VPS16	OK	209.24	194.065	-0.108623	-0.406376	0.63305	0.976524	no	201.653	-0.108623	0.108623	2	0	0	OK	215.022	223.943	0.0586467	0.215626	0.8009	0.992781	no	219.483	0.0586467	0.0586467	2	0	0
12174	ENSMUSG00000041203	ENSMUSG00000041203	Trir	8:85026822-85030286	telomerase RNA component interacting RNase [Source:MGI Symbol;Acc:MGI:1922833]	protein_coding	ENSG00000123144	TRIR	OK	156.687	176.411	0.171047	0.897839	0.2919	0.802946	no	166.549	0.171047	0.171047	2	0	0	OK	191.738	223.778	0.222934	1.18888	0.16985	0.647254	no	207.758	0.222934	0.222934	2	0	0
3526	ENSMUSG00000022185	ENSMUSG00000022185	Acin1	14:54631230-54690741	apoptotic chromatin condensation inducer 1 [Source:MGI Symbol;Acc:MGI:1891824]	protein_coding	ENSG00000100813	ACIN1	OK	154.829	201.816	0.38237	1.47491	0.0588	0.395869	no	178.322	0.38237	0.38237	2	0	0	OK	232.267	223.264	-0.0570293	-0.21355	0.7875	0.992781	no	227.766	-0.0570293	0.0570293	2	0	0
2924	ENSMUSG00000021114	ENSMUSG00000021114	Atp6v1d	12:78840724-78861638	ATPase, H+ transporting, lysosomal V1 subunit D [Source:MGI Symbol;Acc:MGI:1921084]	protein_coding	ENSG00000100554	ATP6V1D	OK	53.7825	47.8353	-0.169061	-0.64281	0.4512	0.923959	no	50.8089	-0.169061	0.169061	2	0	0	OK	233.542	223.173	-0.0655219	-0.283312	0.73645	0.991478	no	228.358	-0.0655219	0.0655219	2	0	0
17466	ENSMUSG00000062397	ENSMUSG00000062397	Zfp706	15:36997026-37044100	zinc finger protein 706 [Source:MGI Symbol;Acc:MGI:1915286]	protein_coding	ENSG00000120963	ZNF706	OK	216.528	258.627	0.256319	0.769104	0.3674	0.869589	no	237.577	0.256319	0.256319	2	0	0	OK	279.472	222.321	-0.330061	-1.01376	0.23585	0.741127	no	250.897	-0.330061	0.330061	2	0	0
6844	ENSMUSG00000028692	ENSMUSG00000028692	Akr1a1	4:116636509-116651680	aldo-keto reductase family 1, member A1 (aldehyde reductase) [Source:MGI Symbol;Acc:MGI:1929955]	protein_coding	ENSG00000117448	AKR1A1	OK	256.953	298.357	0.215535	0.975954	0.24115	0.748896	no	277.655	0.215535	0.215535	2	0	0	OK	239.312	221.993	-0.108375	-0.478593	0.5674	0.964667	no	230.653	-0.108375	0.108375	2	0	0
12681	ENSMUSG00000042712	ENSMUSG00000042712	Tceal9	X:136245078-136247139	transcription elongation factor A like 9 [Source:MGI Symbol;Acc:MGI:109567]	protein_coding	ENSG00000185222	TCEAL9	OK	91.0846	75.8838	-0.263415	-1.28957	0.13385	0.596536	no	83.4842	-0.263415	0.263415	2	0	0	OK	200.089	221.097	0.144041	0.764362	0.372	0.873315	no	210.593	0.144041	0.144041	2	0	0
8932	ENSMUSG00000032383	ENSMUSG00000032383	Ppib	9:66060221-66069719	peptidylprolyl isomerase B [Source:MGI Symbol;Acc:MGI:97750]	protein_coding	ENSG00000166794	PPIB	OK	376.248	441.263	0.229955	1.2478	0.14455	0.604777	no	408.755	0.229955	0.229955	2	0	0	OK	207.076	220.929	0.0934167	0.488679	0.56925	0.965424	no	214.002	0.0934167	0.0934167	2	0	0
3919	ENSMUSG00000022831	ENSMUSG00000022831	Hcls1	16:36934982-36963212	hematopoietic cell specific Lyn substrate 1 [Source:MGI Symbol;Acc:MGI:104568]	protein_coding	ENSG00000180353	HCLS1	OK	159.163	200.297	0.331629	1.71169	0.04405	0.336704	no	179.73	0.331629	0.331629	2	0	0	OK	200.496	220.727	0.138688	0.706464	0.405	0.89584	no	210.612	0.138688	0.138688	2	0	0
22405	ENSMUSG00000078453	ENSMUSG00000078453	Abracl	10:18011259-18023288	ABRA C-terminal like [Source:MGI Symbol;Acc:MGI:1920362]	protein_coding	ENSG00000146386	ABRACL	OK	249.854	282.14	0.175325	0.621991	0.46235	0.929279	no	265.997	0.175325	0.175325	2	0	0	OK	169.033	220.31	0.382228	1.37758	0.10415	0.536272	no	194.671	0.382228	0.382228	2	0	0
4635	ENSMUSG00000024725	ENSMUSG00000024725	Ostf1	19:18516136-18631823	osteoclast stimulating factor 1 [Source:MGI Symbol;Acc:MGI:700012]	protein_coding	ENSG00000134996	OSTF1	OK	207.472	195.001	-0.0894373	-0.465531	0.5886	0.970253	no	201.237	-0.0894373	0.0894373	2	0	0	OK	257.507	220.26	-0.225405	-1.13275	0.1788	0.66175	no	238.883	-0.225405	0.225405	2	0	0
2506	ENSMUSG00000020423	ENSMUSG00000020423	Btg2	1:134075169-134079120	B cell translocation gene 2, anti-proliferative [Source:MGI Symbol;Acc:MGI:108384]	protein_coding	ENSG00000159388	BTG2	OK	10.9124	13.1491	0.269	1.19838	0.16725	0.643464	no	12.0308	0.269	0.269	2	0	0	OK	236.907	219.692	-0.108838	-0.598452	0.4828	0.935071	no	228.3	-0.108838	0.108838	2	0	0
15535	ENSMUSG00000053565	ENSMUSG00000053565	Eif3k	7:28971371-28981864	eukaryotic translation initiation factor 3, subunit K [Source:MGI Symbol;Acc:MGI:1921080]	protein_coding	ENSG00000178982	EIF3K	OK	332.194	317.985	-0.0630689	-0.336576	0.69415	0.985395	no	325.09	-0.0630689	0.0630689	2	0	0	OK	172.069	219.301	0.349922	1.80947	0.0355	0.299289	no	195.685	0.349922	0.349922	2	0	0
2048	ENSMUSG00000019087	ENSMUSG00000019087	Atp6ap1	X:74297096-74304721	ATPase, H+ transporting, lysosomal accessory protein 1 [Source:MGI Symbol;Acc:MGI:109629]	protein_coding	ENSG00000071553	ATP6AP1	OK	54.8263	62.1861	0.181726	0.514973	0.5255	0.95051	no	58.5062	0.181726	0.181726	2	0	0	OK	201.96	219.052	0.117199	0.385239	0.63265	0.976524	no	210.506	0.117199	0.117199	2	0	0
1724	ENSMUSG00000016495	ENSMUSG00000016495	Plgrkt	19:29348598-29367390	plasminogen receptor, C-terminal lysine transmembrane protein [Source:MGI Symbol;Acc:MGI:1915009]	protein_coding	ENSG00000107020	PLGRKT	OK	55.3397	43.2124	-0.35687	-1.45776	0.085	0.483323	no	49.276	-0.35687	0.35687	2	0	0	OK	234.09	217.878	-0.103542	-0.492192	0.56545	0.964168	no	225.984	-0.103542	0.103542	2	0	0
11240	ENSMUSG00000038690	ENSMUSG00000038690	Atp5j2	5:145183697-145192062	ATP synthase, H+ transporting, mitochondrial F0 complex, subunit F2 [Source:MGI Symbol;Acc:MGI:1927558]	protein_coding	ENSG00000241468	ATP5MF	OK	402.989	478.785	0.248636	1.31289	0.11935	0.570441	no	440.887	0.248636	0.248636	2	0	0	OK	196.688	217.807	0.147144	0.729709	0.3986	0.892537	no	207.248	0.147144	0.147144	2	0	0
10688	ENSMUSG00000037361	ENSMUSG00000037361	Sf3b6	12:4817543-4827659	splicing factor 3B, subunit 6 [Source:MGI Symbol;Acc:MGI:1913305]	protein_coding	ENSG00000115128	SF3B6	OK	226.83	264.251	0.220298	0.8987	0.29565	0.806849	no	245.541	0.220298	0.220298	2	0	0	OK	216.178	217.555	0.00916223	0.0370374	0.9662	0.99505	no	216.867	0.00916223	0.00916223	2	0	0
13273	ENSMUSG00000044894	ENSMUSG00000044894	Uqcrq	11:53427921-53430831	ubiquinol-cytochrome c reductase, complex III subunit VII [Source:MGI Symbol;Acc:MGI:107807]	protein_coding	ENSG00000164405	UQCRQ	OK	548.979	584.542	0.0905568	0.459452	0.59205	0.971107	no	566.761	0.0905568	0.0905568	2	0	0	OK	161.329	217.361	0.430093	1.93697	0.02325	0.227334	no	189.345	0.430093	0.430093	2	0	0
11344	ENSMUSG00000038963	ENSMUSG00000038963	Slco4a1	2:180456244-180474867	solute carrier organic anion transporter family, member 4a1 [Source:MGI Symbol;Acc:MGI:1351866]	protein_coding	ENSG00000101187	SLCO4A1	OK	38.2193	32.7932	-0.220902	-1.03247	0.22525	0.728125	no	35.5062	-0.220902	0.220902	2	0	0	OK	196.693	217.066	0.142186	0.703637	0.40465	0.895803	no	206.88	0.142186	0.142186	2	0	0
1583	ENSMUSG00000015314	ENSMUSG00000015314	Slamf6	1:171909956-171953170	SLAM family member 6 [Source:MGI Symbol;Acc:MGI:1353620]	protein_coding	ENSG00000162739	SLAMF6	OK	91.2261	146.793	0.686267	2.08739	0.0123	0.14771	no	119.01	0.686267	0.686267	2	0	0	OK	282.565	215.764	-0.389126	-1.19577	0.15515	0.621327	no	249.165	-0.389126	0.389126	2	0	0
3531	ENSMUSG00000022194	ENSMUSG00000022194	Pabpn1	14:54883376-54898169	poly(A) binding protein, nuclear 1 [Source:MGI Symbol;Acc:MGI:1859158]	protein_coding	ENSG00000100836	PABPN1	OK	329.823	338.322	0.0367039	0.181207	0.8337	0.992781	no	334.072	0.0367039	0.0367039	2	0	0	OK	192.897	214.845	0.155461	0.692894	0.42195	0.907259	no	203.871	0.155461	0.155461	2	0	0
8277	ENSMUSG00000031304	ENSMUSG00000031304	Il2rg	X:101261375-101269023	interleukin 2 receptor, gamma chain [Source:MGI Symbol;Acc:MGI:96551]	protein_coding	NA	NA	OK	55.4564	72.6969	0.390541	1.70113	0.04725	0.350618	no	64.0767	0.390541	0.390541	2	0	0	OK	196.396	214.796	0.129203	0.566827	0.4992	0.941935	no	205.596	0.129203	0.129203	2	0	0
2087	ENSMUSG00000019428	ENSMUSG00000019428	Fkbp8	8:70508262-70535328	FK506 binding protein 8 [Source:MGI Symbol;Acc:MGI:1341070]	protein_coding	ENSG00000105701	FKBP8	OK	163.874	182.414	0.154634	0.396639	0.6265	0.975017	no	173.144	0.154634	0.154634	2	0	0	OK	188.385	214.149	0.184928	0.63791	0.44935	0.922507	no	201.267	0.184928	0.184928	2	0	0
4573	ENSMUSG00000024587	ENSMUSG00000024587	Nars	18:64499646-64516652	asparaginyl-tRNA synthetase [Source:MGI Symbol;Acc:MGI:1917473]	protein_coding	ENSG00000134440	NARS	OK	194.981	176.112	-0.146834	-0.585577	0.4822	0.935071	no	185.546	-0.146834	0.146834	2	0	0	OK	174.657	214.072	0.293571	1.12769	0.17235	0.651457	no	194.365	0.293571	0.293571	2	0	0
19870	ENSMUSG00000070738	ENSMUSG00000070738	Dgkd	1:87853286-88008551	diacylglycerol kinase, delta [Source:MGI Symbol;Acc:MGI:2138334]	protein_coding	ENSG00000077044	DGKD	OK	83.1872	99.3319	0.255895	0.994112	0.15335	0.617934	no	91.2596	0.255895	0.255895	2	0	0	OK	230.37	213.759	-0.107965	-0.411099	0.53625	0.954811	no	222.065	-0.107965	0.107965	2	0	0
9698	ENSMUSG00000034484	ENSMUSG00000034484	Snx2	18:53176315-53220865	sorting nexin 2 [Source:MGI Symbol;Acc:MGI:1915054]	protein_coding	ENSG00000205302	SNX2	OK	281.766	271.008	-0.0561634	-0.263298	0.75105	0.992469	no	276.387	-0.0561634	0.0561634	2	0	0	OK	232.361	213.358	-0.123096	-0.564588	0.49735	0.941308	no	222.859	-0.123096	0.123096	2	0	0
7957	ENSMUSG00000030678	ENSMUSG00000030678	Maz	7:127022129-127027037	MYC-associated zinc finger protein (purine-binding transcription factor) [Source:MGI Symbol;Acc:MGI:1338823]	protein_coding	ENSG00000103495	MAZ	OK	234.224	249.433	0.0907603	0.34687	0.68065	0.983076	no	241.828	0.0907603	0.0907603	2	0	0	OK	212.957	213.038	0.000548493	0.00205706	0.998	0.999148	no	212.998	0.000548493	0.000548493	2	0	0
1580	ENSMUSG00000015291	ENSMUSG00000015291	Gdi1	X:74304997-74311862	guanosine diphosphate (GDP) dissociation inhibitor 1 [Source:MGI Symbol;Acc:MGI:99846]	protein_coding	ENSG00000203879	GDI1	OK	107.599	107.13	-0.0063099	-0.0226043	0.97725	0.995888	no	107.364	-0.0063099	0.0063099	2	0	0	OK	209.453	212.774	0.0226941	0.0802226	0.9242	0.993025	no	211.113	0.0226941	0.0226941	2	0	0
6394	ENSMUSG00000027942	ENSMUSG00000027942	4933434E20Rik	3:89995445-90068347	RIKEN cDNA 4933434E20 gene [Source:MGI Symbol;Acc:MGI:1914027]	protein_coding	ENSG00000143612	C1orf43	OK	70.8943	76.876	0.116863	0.212066	0.8029	0.992781	no	73.8852	0.116863	0.116863	2	0	0	OK	187.074	212.755	0.185587	0.431343	0.60545	0.973311	no	199.915	0.185587	0.185587	2	0	0
13722	ENSMUSG00000046516	ENSMUSG00000046516	Cox17	16:38346990-38378216	cytochrome c oxidase assembly protein 17, copper chaperone [Source:MGI Symbol;Acc:MGI:1333806]	protein_coding	NA	NA	OK	386.166	306.775	-0.332039	-1.19842	0.15475	0.620518	no	346.471	-0.332039	0.332039	2	0	0	OK	227.068	212.179	-0.0978376	-0.272404	0.7419	0.992462	no	219.624	-0.0978376	0.0978376	2	0	0
4310	ENSMUSG00000024121	ENSMUSG00000024121	Atp6v0c	17:24163865-24169702	ATPase, H+ transporting, lysosomal V0 subunit C [Source:MGI Symbol;Acc:MGI:88116]	protein_coding	ENSG00000185883	ATP6V0C	OK	38.3145	42.3864	0.14571	0.378023	0.65775	0.978996	no	40.3505	0.14571	0.14571	2	0	0	OK	181.077	212.006	0.227504	0.832707	0.3274	0.836106	no	196.541	0.227504	0.227504	2	0	0
1952	ENSMUSG00000018559	ENSMUSG00000018559	Ctdnep1	11:69968221-69990601	CTD nuclear envelope phosphatase 1 [Source:MGI Symbol;Acc:MGI:1914431]	protein_coding	ENSG00000175826	CTDNEP1	OK	130.36	162.41	0.317138	1.21747	0.15585	0.622363	no	146.385	0.317138	0.317138	2	0	0	OK	188.021	211.444	0.16938	0.713327	0.40375	0.895392	no	199.732	0.16938	0.16938	2	0	0
16424	ENSMUSG00000057666	ENSMUSG00000057666	Gapdh	6:125145240-125166467	glyceraldehyde-3-phosphate dehydrogenase [Source:MGI Symbol;Acc:MGI:95640]	protein_coding	NA	NA	OK	1482.33	1239.4	-0.258223	-1.32368	0.1151	0.561254	no	1360.87	-0.258223	0.258223	2	0	0	OK	185.326	211.219	0.188672	0.731114	0.38285	0.880525	no	198.272	0.188672	0.188672	2	0	0
1247	ENSMUSG00000009555	ENSMUSG00000009555	Cdk9	2:32705783-32713076	cyclin-dependent kinase 9 (CDC2-related kinase) [Source:MGI Symbol;Acc:MGI:1328368]	protein_coding	ENSG00000136807	CDK9	OK	142.795	165.045	0.208916	0.791435	0.3445	0.851609	no	153.92	0.208916	0.208916	2	0	0	OK	182.798	210.965	0.206752	0.776449	0.35845	0.862132	no	196.882	0.206752	0.206752	2	0	0
9071	ENSMUSG00000032604	ENSMUSG00000032604	Qars	9:108507705-108515941	glutaminyl-tRNA synthetase [Source:MGI Symbol;Acc:MGI:1915851]	protein_coding	ENSG00000172053	QARS	OK	318.007	348.866	0.133613	0.580047	0.49755	0.941308	no	333.437	0.133613	0.133613	2	0	0	OK	214.038	210.934	-0.0210738	-0.0922582	0.91015	0.992805	no	212.486	-0.0210738	0.0210738	2	0	0
8900	ENSMUSG00000032336	ENSMUSG00000032336	Nptn	9:58582239-58743964	neuroplastin [Source:MGI Symbol;Acc:MGI:108077]	protein_coding	ENSG00000156642	NPTN	OK	76.2316	96.2997	0.337142	1.20951	0.15395	0.618585	no	86.2656	0.337142	0.337142	2	0	0	OK	218.332	210.751	-0.0509823	-0.19588	0.81585	0.992781	no	214.541	-0.0509823	0.0509823	2	0	0
7907	ENSMUSG00000030591	ENSMUSG00000030591	Psmd8	7:29174187-29180701	proteasome (prosome, macropain) 26S subunit, non-ATPase, 8 [Source:MGI Symbol;Acc:MGI:1888669]	protein_coding	ENSG00000099341	PSMD8	OK	162.812	159.982	-0.0253041	-0.127189	0.87515	0.992781	no	161.397	-0.0253041	0.0253041	2	0	0	OK	149.459	210.646	0.495074	2.25011	0.00705	0.103932	no	180.053	0.495074	0.495074	2	0	0
6294	ENSMUSG00000027763	ENSMUSG00000027763	Mbnl1	3:60472829-60629750	muscleblind like splicing factor 1 [Source:MGI Symbol;Acc:MGI:1928482]	protein_coding	ENSG00000152601	MBNL1	OK	97.4644	129.05	0.404981	1.11689	0.05075	0.362111	no	113.257	0.404981	0.404981	2	0	0	OK	245.845	210.477	-0.224084	-0.577372	0.30835	0.818158	no	228.161	-0.224084	0.224084	2	0	0
10411	ENSMUSG00000036622	ENSMUSG00000036622	Atp13a2	4:140986872-141007330	ATPase type 13A2 [Source:MGI Symbol;Acc:MGI:1922022]	protein_coding	ENSG00000159363	ATP13A2	OK	84.9529	99.5148	0.228247	0.774805	0.2756	0.786723	no	92.2338	0.228247	0.228247	2	0	0	OK	218.996	209.861	-0.0614723	-0.210369	0.78105	0.992697	no	214.428	-0.0614723	0.0614723	2	0	0
9524	ENSMUSG00000034024	ENSMUSG00000034024	Cct2	10:117051000-117063814	chaperonin containing Tcp1, subunit 2 (beta) [Source:MGI Symbol;Acc:MGI:107186]	protein_coding	ENSG00000166226	CCT2	OK	419.295	410.06	-0.032131	-0.146361	0.86585	0.992781	no	414.678	-0.032131	0.032131	2	0	0	OK	212.469	209.667	-0.0191509	-0.087295	0.91585	0.992994	no	211.068	-0.0191509	0.0191509	2	0	0
4464	ENSMUSG00000024387	ENSMUSG00000024387	Csnk2b	17:35116195-35128855	casein kinase 2, beta polypeptide [Source:MGI Symbol;Acc:MGI:88548]	protein_coding	ENSG00000204435	CSNK2B	OK	227.394	295.694	0.378907	1.61237	0.06205	0.409443	no	261.544	0.378907	0.378907	2	0	0	OK	165.94	208.746	0.331091	1.24302	0.14345	0.603697	no	187.343	0.331091	0.331091	2	0	0
2101	ENSMUSG00000019505	ENSMUSG00000019505	Ubb	11:62551170-62553213	ubiquitin B [Source:MGI Symbol;Acc:MGI:98888]	protein_coding	ENSG00000170315	UBB	OK	193.814	188.609	-0.0392779	-0.214105	0.80335	0.992781	no	191.212	-0.0392779	0.0392779	2	0	0	OK	211.648	208.401	-0.0223015	-0.121962	0.8842	0.992781	no	210.024	-0.0223015	0.0223015	2	0	0
41117	ENSMUSG00000102976	ENSMUSG00000102976	Zc3h11a	1:133619861-133661380	zinc finger CCCH type containing 11A [Source:MGI Symbol;Acc:MGI:1917829]	protein_coding	NA	NA	OK	72.9955	72.9489	-0.000922026	-0.00242061	0.9971	0.999012	no	72.9722	-0.000922026	0.000922026	2	0	0	OK	233.256	208.101	-0.164628	-0.435995	0.5693	0.965424	no	220.678	-0.164628	0.164628	2	0	0
13333	ENSMUSG00000045092	ENSMUSG00000045092	S1pr1	3:115710432-115715072	sphingosine-1-phosphate receptor 1 [Source:MGI Symbol;Acc:MGI:1096355]	protein_coding	ENSG00000170989	S1PR1	OK	5.41611	4.48264	-0.272909	-1.01519	0.23915	0.746094	no	4.94937	-0.272909	0.272909	2	0	0	OK	237.245	207.801	-0.191173	-1.05297	0.21995	0.721629	no	222.523	-0.191173	0.191173	2	0	0
136	ENSMUSG00000000787	ENSMUSG00000000787	Ddx3x	X:13280969-13294052	DEAD/H (Asp-Glu-Ala-Asp/His) box polypeptide 3, X-linked [Source:MGI Symbol;Acc:MGI:103064]	protein_coding	NA	NA	OK	86.5956	119.978	0.470407	2.41371	0.0023	0.0452288	yes	103.287	0.470407	0.470407	2	0	0	OK	242.192	207.662	-0.221916	-1.08947	0.1695	0.64681	no	224.927	-0.221916	0.221916	2	0	0
9911	ENSMUSG00000035086	ENSMUSG00000035086	Becn1	11:101277967-101302286	beclin 1, autophagy related [Source:MGI Symbol;Acc:MGI:1891828]	protein_coding	ENSG00000126581	BECN1	OK	132.551	153.106	0.207982	0.594186	0.4822	0.935071	no	142.828	0.207982	0.207982	2	0	0	OK	172.778	207.435	0.263739	0.803459	0.3141	0.82373	no	190.106	0.263739	0.263739	2	0	0
5121	ENSMUSG00000025580	ENSMUSG00000025580	Eif4a3	11:119288362-119300089	eukaryotic translation initiation factor 4A3 [Source:MGI Symbol;Acc:MGI:1923731]	protein_coding	NA	NA	OK	277.059	308.003	0.152753	0.658539	0.44415	0.919467	no	292.531	0.152753	0.152753	2	0	0	OK	178.88	207.411	0.213494	0.886173	0.2977	0.807851	no	193.145	0.213494	0.213494	2	0	0
1443	ENSMUSG00000013662	ENSMUSG00000013662	Atad1	19:32671637-32739786	ATPase family, AAA domain containing 1 [Source:MGI Symbol;Acc:MGI:1915229]	protein_coding	ENSG00000138138	ATAD1	OK	172.047	172.24	0.00162056	0.00663677	0.9942	0.998661	no	172.144	0.00162056	0.00162056	2	0	0	OK	257.783	207.36	-0.314021	-1.30234	0.12415	0.57997	no	232.572	-0.314021	0.314021	2	0	0
1420	ENSMUSG00000013160	ENSMUSG00000013160	Atp6v0d1	8:105524464-105566047	ATPase, H+ transporting, lysosomal V0 subunit D1 [Source:MGI Symbol;Acc:MGI:1201778]	protein_coding	ENSG00000159720	ATP6V0D1	OK	40.9373	41.1695	0.00816131	0.0395198	0.96205	0.995028	no	41.0534	0.00816131	0.00816131	2	0	0	OK	166.98	206.782	0.308436	1.62489	0.0516	0.365817	no	186.881	0.308436	0.308436	2	0	0
11716	ENSMUSG00000039936	ENSMUSG00000039936	Pik3cd	4:149649167-149702571	phosphatidylinositol-4,5-bisphosphate 3-kinase catalytic subunit delta [Source:MGI Symbol;Acc:MGI:1098211]	protein_coding	ENSG00000171608	PIK3CD	OK	166.095	174.14	0.0682363	0.261119	0.6867	0.984463	no	170.118	0.0682363	0.0682363	2	0	0	OK	236.397	205.673	-0.20086	-0.836191	0.22205	0.724642	no	221.035	-0.20086	0.20086	2	0	0
9741	ENSMUSG00000034614	ENSMUSG00000034614	Pik3ip1	11:3288873-3342971	phosphoinositide-3-kinase interacting protein 1 [Source:MGI Symbol;Acc:MGI:1917016]	protein_coding	ENSG00000100100	PIK3IP1	OK	25.363	16.678	-0.604777	-1.1576	0.15505	0.621191	no	21.0205	-0.604777	0.604777	2	0	0	OK	150.997	205.645	0.445633	1.52903	0.0685	0.431417	no	178.321	0.445633	0.445633	2	0	0
7450	ENSMUSG00000029672	ENSMUSG00000029672	Fam3c	6:22306519-22356243	family with sequence similarity 3, member C [Source:MGI Symbol;Acc:MGI:107892]	protein_coding	ENSG00000196937	FAM3C	OK	39.7046	47.5803	0.261057	1.21854	0.1499	0.611457	no	43.6424	0.261057	0.261057	2	0	0	OK	150.575	204.98	0.445002	2.21465	0.0102	0.130372	no	177.777	0.445002	0.445002	2	0	0
10675	ENSMUSG00000037337	ENSMUSG00000037337	Map4k1	7:28982049-29003279	mitogen-activated protein kinase kinase kinase kinase 1 [Source:MGI Symbol;Acc:MGI:1346882]	protein_coding	ENSG00000104814	MAP4K1	OK	93.9667	93.7702	-0.00302121	-0.0102258	0.99105	0.997886	no	93.8684	-0.00302121	0.00302121	2	0	0	OK	157.186	204.731	0.381251	1.37184	0.1045	0.536996	no	180.959	0.381251	0.381251	2	0	0
14521	ENSMUSG00000049422	ENSMUSG00000049422	Chchd10	10:75923221-75940672	coiled-coil-helix-coiled-coil-helix domain containing 10 [Source:MGI Symbol;Acc:MGI:2143558]	protein_coding	ENSG00000250479	CHCHD10	OK	818.28	793.473	-0.0444131	-0.197008	0.82065	0.992781	no	805.876	-0.0444131	0.0444131	2	0	0	OK	194.293	204.409	0.0732233	0.280923	0.7419	0.992462	no	199.351	0.0732233	0.0732233	2	0	0
2043	ENSMUSG00000019054	ENSMUSG00000019054	Fis1	5:136953274-136966234	fission, mitochondrial 1 [Source:MGI Symbol;Acc:MGI:1913687]	protein_coding	ENSG00000214253	FIS1	OK	147.335	168.473	0.193414	0.969971	0.25585	0.763692	no	157.904	0.193414	0.193414	2	0	0	OK	165.051	203.916	0.305065	1.5383	0.06995	0.43665	no	184.483	0.305065	0.305065	2	0	0
17257	ENSMUSG00000061518	ENSMUSG00000061518	Cox5b	1:36691448-36693681	cytochrome c oxidase subunit 5B [Source:MGI Symbol;Acc:MGI:88475]	protein_coding	NA	NA	OK	408.685	469.728	0.200836	0.898329	0.2933	0.804443	no	439.207	0.200836	0.200836	2	0	0	OK	202.326	203.823	0.0106334	0.043816	0.9563	0.994937	no	203.075	0.0106334	0.0106334	2	0	0
6233	ENSMUSG00000027639	ENSMUSG00000027639	Samhd1	2:157097532-157135265	SAM domain and HD domain, 1 [Source:MGI Symbol;Acc:MGI:1927468]	protein_coding	ENSG00000101347	SAMHD1	OK	46.7226	61.2949	0.391647	1.29272	0.12075	0.573055	no	54.0087	0.391647	0.391647	2	0	0	OK	214.008	203.78	-0.0706533	-0.24151	0.77945	0.99265	no	208.894	-0.0706533	0.0706533	2	0	0
2183	ENSMUSG00000019857	ENSMUSG00000019857	Asf1a	10:53536314-53630439	anti-silencing function 1A histone chaperone [Source:MGI Symbol;Acc:MGI:1913653]	protein_coding	ENSG00000111875	ASF1A	OK	88.125	101.245	0.200225	0.731746	0.39195	0.88761	no	94.685	0.200225	0.200225	2	0	0	OK	251.345	203.676	-0.303391	-1.17689	0.16655	0.64249	no	227.51	-0.303391	0.303391	2	0	0
4530	ENSMUSG00000024513	ENSMUSG00000024513	Mbd2	18:70568188-70626131	methyl-CpG binding domain protein 2 [Source:MGI Symbol;Acc:MGI:1333813]	protein_coding	ENSG00000134046	MBD2	OK	201.323	246.857	0.29416	1.11522	0.1897	0.679523	no	224.09	0.29416	0.29416	2	0	0	OK	203.578	203.65	0.000509178	0.00193918	0.9987	0.999391	no	203.614	0.000509178	0.000509178	2	0	0
670	ENSMUSG00000004096	ENSMUSG00000004096	Cwc15	9:14500616-14510577	CWC15 spliceosome-associated protein [Source:MGI Symbol;Acc:MGI:1913320]	protein_coding	ENSG00000150316	CWC15	OK	195.884	215.081	0.134879	0.663273	0.4359	0.91391	no	205.482	0.134879	0.134879	2	0	0	OK	246.781	203.432	-0.278683	-1.38821	0.1047	0.537485	no	225.106	-0.278683	0.278683	2	0	0
2064	ENSMUSG00000019210	ENSMUSG00000019210	Atp6v1e1	6:120773577-120822793	ATPase, H+ transporting, lysosomal V1 subunit E1 [Source:MGI Symbol;Acc:MGI:894326]	protein_coding	none	NA	OK	74.096	75.4868	0.0268297	0.0837442	0.9212	0.993025	no	74.7914	0.0268297	0.0268297	2	0	0	OK	189.118	203.092	0.102845	0.328151	0.7001	0.986143	no	196.105	0.102845	0.102845	2	0	0
11773	ENSMUSG00000040093	ENSMUSG00000040093	Bmf	2:118528756-118549687	BCL2 modifying factor [Source:MGI Symbol;Acc:MGI:2176433]	protein_coding	ENSG00000104081	BMF	OK	5.34783	4.94374	-0.113353	-0.275616	0.6369	0.97656	no	5.14579	-0.113353	0.113353	2	0	0	OK	199.06	202.779	0.0267071	0.102786	0.87285	0.992781	no	200.919	0.0267071	0.0267071	2	0	0
1852	ENSMUSG00000017774	ENSMUSG00000017774	Myo1c	11:75650503-75673910	myosin IC [Source:MGI Symbol;Acc:MGI:106612]	protein_coding	ENSG00000197879	MYO1C	OK	50.0865	62.08	0.309707	1.26383	0.08135	0.472181	no	56.0832	0.309707	0.309707	2	0	0	OK	206.214	202.563	-0.025774	-0.101882	0.8818	0.992781	no	204.388	-0.025774	0.025774	2	0	0
4263	ENSMUSG00000024048	ENSMUSG00000024048	Myl12a	17:70853766-71475343	myosin, light chain 12A, regulatory, non-sarcomeric [Source:MGI Symbol;Acc:MGI:1914518]	protein_coding	none	NA	OK	239.393	225.712	-0.0848979	-0.213106	0.80095	0.992781	no	232.553	-0.0848979	0.0848979	2	0	0	OK	219.981	202.111	-0.122235	-0.276644	0.74485	0.992469	no	211.046	-0.122235	0.122235	2	0	0
22453	ENSMUSG00000078578	ENSMUSG00000078578	Ube2d3	3:135436208-135468198	ubiquitin-conjugating enzyme E2D 3 [Source:MGI Symbol;Acc:MGI:1913355]	protein_coding	ENSG00000109332	UBE2D3	OK	165.432	181.488	0.133642	0.612467	0.45695	0.926449	no	173.46	0.133642	0.133642	2	0	0	OK	249.405	201.982	-0.304263	-1.41714	0.0764	0.456168	no	225.694	-0.304263	0.304263	2	0	0
2465	ENSMUSG00000020358	ENSMUSG00000020358	Hnrnpab	11:51584756-51606847	heterogeneous nuclear ribonucleoprotein A/B [Source:MGI Symbol;Acc:MGI:1330294]	protein_coding	ENSG00000197451	HNRNPAB	OK	544.117	674.726	0.310384	1.61288	0.057	0.388526	no	609.421	0.310384	0.310384	2	0	0	OK	198.579	201.537	0.0213316	0.109126	0.8997	0.992805	no	200.058	0.0213316	0.0213316	2	0	0
13580	ENSMUSG00000045983	ENSMUSG00000045983	Eif4g1	16:20668312-20692884	eukaryotic translation initiation factor 4, gamma 1 [Source:MGI Symbol;Acc:MGI:2384784]	protein_coding	ENSG00000114867	EIF4G1	OK	273.427	366.459	0.422495	1.02418	0.18985	0.679716	no	319.943	0.422495	0.422495	2	0	0	OK	193.922	201.116	0.052556	0.114244	0.8856	0.992781	no	197.519	0.052556	0.052556	2	0	0
11895	ENSMUSG00000040415	ENSMUSG00000040415	Dtx3	10:127190377-127211585	deltex 3, E3 ubiquitin ligase [Source:MGI Symbol;Acc:MGI:2135752]	protein_coding	ENSG00000178498	DTX3	OK	48.0446	39.6544	-0.276894	-0.518896	0.5125	0.946704	no	43.8495	-0.276894	0.276894	2	0	0	OK	169.499	200.949	0.245553	0.50213	0.5293	0.951866	no	185.224	0.245553	0.245553	2	0	0
1810	ENSMUSG00000017485	ENSMUSG00000017485	Top2b	14:16336845-16819156	topoisomerase (DNA) II beta [Source:MGI Symbol;Acc:MGI:98791]	protein_coding	ENSG00000077097	TOP2B	OK	151.85	171.587	0.176286	0.530471	0.53275	0.953515	no	161.719	0.176286	0.176286	2	0	0	OK	256.521	200.56	-0.355045	-1.06109	0.21685	0.718053	no	228.541	-0.355045	0.355045	2	0	0
3676	ENSMUSG00000022433	ENSMUSG00000022433	Csnk1e	15:79417855-79455566	casein kinase 1, epsilon [Source:MGI Symbol;Acc:MGI:1351660]	protein_coding	ENSG00000213923	CSNK1E	OK	39.7722	43.5459	0.130778	0.345306	0.68625	0.9844	no	41.6591	0.130778	0.130778	2	0	0	OK	166.88	200.141	0.262205	0.861923	0.2943	0.805698	no	183.51	0.262205	0.262205	2	0	0
6821	ENSMUSG00000028656	ENSMUSG00000028656	Cap1	4:122836241-122886056	CAP, adenylate cyclase-associated protein 1 (yeast) [Source:MGI Symbol;Acc:MGI:88262]	protein_coding	ENSG00000131236	CAP1	OK	204.239	243.552	0.253968	1.1361	0.1481	0.608647	no	223.895	0.253968	0.253968	2	0	0	OK	237.652	200.083	-0.248252	-0.796923	0.2826	0.794089	no	218.868	-0.248252	0.248252	2	0	0
9681	ENSMUSG00000034445	ENSMUSG00000034445	Cyb561a3	19:10570477-10629819	cytochrome b561 family, member A3 [Source:MGI Symbol;Acc:MGI:2686925]	protein_coding	ENSG00000162144	CYB561A3	OK	54.834	60.1401	0.133257	0.218051	0.71505	0.988404	no	57.487	0.133257	0.133257	2	0	0	OK	163.53	199.621	0.287707	0.814084	0.22705	0.730142	no	181.576	0.287707	0.287707	2	0	0
10177	ENSMUSG00000035885	ENSMUSG00000035885	Cox8a	19:7215152-7217616	cytochrome c oxidase subunit 8A [Source:MGI Symbol;Acc:MGI:105959]	protein_coding	ENSG00000176340	COX8A	OK	529.835	493.095	-0.103679	-0.557861	0.51595	0.948016	no	511.465	-0.103679	0.103679	2	0	0	OK	168.106	198.954	0.243061	1.20769	0.1622	0.63553	no	183.53	0.243061	0.243061	2	0	0
3029	ENSMUSG00000021290	ENSMUSG00000021290	Atp5mpl	12:111961374-111966977	ATP synthase membrane subunit 6.8PL [Source:MGI Symbol;Acc:MGI:1917507]	protein_coding	ENSG00000156411	ATP5MPL	OK	492.952	529.399	0.102909	0.521109	0.53845	0.955578	no	511.175	0.102909	0.102909	2	0	0	OK	197.288	198.531	0.00905529	0.0408466	0.95975	0.995028	no	197.91	0.00905529	0.00905529	2	0	0
9509	ENSMUSG00000033970	ENSMUSG00000033970	Rfc3	5:151642755-151651242	replication factor C (activator 1) 3 [Source:MGI Symbol;Acc:MGI:1916513]	protein_coding	ENSG00000133119	RFC3	OK	74.6525	100.617	0.430618	1.7232	0.04445	0.337976	no	87.6347	0.430618	0.430618	2	0	0	OK	213.651	198.33	-0.107352	-0.451718	0.59345	0.971235	no	205.99	-0.107352	0.107352	2	0	0
7835	ENSMUSG00000030435	ENSMUSG00000030435	U2af2	7:5062142-5079938	U2 small nuclear ribonucleoprotein auxiliary factor (U2AF) 2 [Source:MGI Symbol;Acc:MGI:98886]	protein_coding	ENSG00000063244	U2AF2	OK	160.411	214.284	0.417748	2.05401	0.01655	0.181093	no	187.347	0.417748	0.417748	2	0	0	OK	160.866	198.291	0.301756	1.44901	0.0821	0.474582	no	179.579	0.301756	0.301756	2	0	0
70	ENSMUSG00000000378	ENSMUSG00000000378	Ccm2	11:6546886-6596744	cerebral cavernous malformation 2 [Source:MGI Symbol;Acc:MGI:2384924]	protein_coding	ENSG00000136280	CCM2	OK	65.5555	74.8205	0.190716	0.830787	0.3313	0.839907	no	70.188	0.190716	0.190716	2	0	0	OK	202.119	198.03	-0.0294894	-0.132342	0.8728	0.992781	no	200.075	-0.0294894	0.0294894	2	0	0
12251	ENSMUSG00000041459	ENSMUSG00000041459	Tardbp	4:148602553-148627019	TAR DNA binding protein [Source:MGI Symbol;Acc:MGI:2387629]	protein_coding	ENSG00000120948	TARDBP	OK	272.153	343.821	0.337239	1.41034	0.09175	0.502802	no	307.987	0.337239	0.337239	2	0	0	OK	190.21	197.398	0.0535105	0.198672	0.8181	0.992781	no	193.804	0.0535105	0.0535105	2	0	0
4804	ENSMUSG00000024991	ENSMUSG00000024991	Eif3a	19:60761116-60790658	eukaryotic translation initiation factor 3, subunit A [Source:MGI Symbol;Acc:MGI:95301]	protein_coding	ENSG00000107581	EIF3A	OK	189.4	212.303	0.164691	0.581077	0.4738	0.932721	no	200.851	0.164691	0.164691	2	0	0	OK	166.347	197.274	0.246001	0.973531	0.20525	0.702615	no	181.81	0.246001	0.246001	2	0	0
16677	ENSMUSG00000058835	ENSMUSG00000058835	Abi1	2:22895320-23040241	abl-interactor 1 [Source:MGI Symbol;Acc:MGI:104913]	protein_coding	ENSG00000136754	ABI1	OK	61.4205	86.4318	0.492841	1.56703	0.0602	0.401604	no	73.9261	0.492841	0.492841	2	0	0	OK	213.527	196.998	-0.11624	-0.420225	0.60545	0.973311	no	205.262	-0.11624	0.11624	2	0	0
14170	ENSMUSG00000048076	ENSMUSG00000048076	Arf1	11:59211411-59228270	ADP-ribosylation factor 1 [Source:MGI Symbol;Acc:MGI:99431]	protein_coding	ENSG00000143761	ARF1	OK	206.34	243.123	0.23666	1.30078	0.1339	0.596712	no	224.731	0.23666	0.23666	2	0	0	OK	202.111	196.942	-0.037381	-0.205077	0.8102	0.992781	no	199.526	-0.037381	0.037381	2	0	0
2561	ENSMUSG00000020516	ENSMUSG00000020516	Rps6kb1	11:86484656-86544805	ribosomal protein S6 kinase, polypeptide 1 [Source:MGI Symbol;Acc:MGI:1270849]	protein_coding	NA	NA	OK	30.99	36.2576	0.226479	0.442713	0.5998	0.972428	no	33.6238	0.226479	0.226479	2	0	0	OK	201.547	196.932	-0.0334225	-0.0881354	0.91105	0.992805	no	199.239	-0.0334225	0.0334225	2	0	0
17022	ENSMUSG00000060373	ENSMUSG00000060373	Hnrnpc	14:52073376-52104028	heterogeneous nuclear ribonucleoprotein C [Source:MGI Symbol;Acc:MGI:107795]	protein_coding	NA	NA	OK	263.799	303.287	0.201243	1.0182	0.22475	0.727854	no	283.543	0.201243	0.201243	2	0	0	OK	198.31	195.97	-0.0171218	-0.0796556	0.92285	0.993025	no	197.14	-0.0171218	0.0171218	2	0	0
8868	ENSMUSG00000032294	ENSMUSG00000032294	Pkm	9:59656367-59679375	pyruvate kinase, muscle [Source:MGI Symbol;Acc:MGI:97591]	protein_coding	ENSG00000067225	PKM	OK	1386.58	1046.7	-0.405687	-1.95677	0.0182	0.192719	no	1216.64	-0.405687	0.405687	2	0	0	OK	184.282	195.943	0.0885172	0.420753	0.60295	0.973311	no	190.113	0.0885172	0.0885172	2	0	0
3657	ENSMUSG00000022403	ENSMUSG00000022403	St13	15:81363668-81400077	suppression of tumorigenicity 13 [Source:MGI Symbol;Acc:MGI:1917606]	protein_coding	ENSG00000100380	ST13	OK	182.668	210.798	0.206638	0.729652	0.37475	0.875262	no	196.733	0.206638	0.206638	2	0	0	OK	157.463	195.251	0.31032	1.18422	0.1457	0.606247	no	176.357	0.31032	0.31032	2	0	0
3625	ENSMUSG00000022353	ENSMUSG00000022353	Mtss1	15:58941233-59082005	metastasis suppressor 1 [Source:MGI Symbol;Acc:MGI:2384818]	protein_coding	ENSG00000170873	MTSS1	OK	41.5377	49.676	0.258128	0.791658	0.30805	0.817939	no	45.6069	0.258128	0.258128	2	0	0	OK	222.61	195.158	-0.189878	-0.603718	0.41775	0.904607	no	208.884	-0.189878	0.189878	2	0	0
13701	ENSMUSG00000046434	ENSMUSG00000046434	Hnrnpa1	15:103240431-103246692	heterogeneous nuclear ribonucleoprotein A1 [Source:MGI Symbol;Acc:MGI:104820]	protein_coding	ENSG00000135486	HNRNPA1	OK	491.5	464.765	-0.0806894	-0.421718	0.61935	0.974147	no	478.132	-0.0806894	0.0806894	2	0	0	OK	178.373	195.118	0.129447	0.666888	0.44175	0.917657	no	186.745	0.129447	0.129447	2	0	0
7399	ENSMUSG00000029599	ENSMUSG00000029599	Ddx54	5:120612738-120634235	DEAD (Asp-Glu-Ala-Asp) box polypeptide 54 [Source:MGI Symbol;Acc:MGI:1919240]	protein_coding	ENSG00000123064	DDX54	OK	58.9526	62.9036	0.093586	0.415884	0.5769	0.967324	no	60.9281	0.093586	0.093586	2	0	0	OK	155.638	195.065	0.325764	0.922867	0.25705	0.765371	no	175.351	0.325764	0.325764	2	0	0
10375	ENSMUSG00000036529	ENSMUSG00000036529	Sbf1	15:89288235-89315311	SET binding factor 1 [Source:MGI Symbol;Acc:MGI:1925230]	protein_coding	ENSG00000100241	SBF1	OK	169.137	161.35	-0.0680004	-0.166209	0.8471	0.992781	no	165.243	-0.0680004	0.0680004	2	0	0	OK	156.423	194.15	0.311721	0.72458	0.39495	0.889513	no	175.286	0.311721	0.311721	2	0	0
16028	ENSMUSG00000055839	ENSMUSG00000055839	Elob	17:23790531-23829136	elongin B [Source:MGI Symbol;Acc:MGI:1914923]	protein_coding	ENSG00000103363	ELOB	OK	298.545	301.173	0.0126431	0.0194657	0.98155	0.996116	no	299.859	0.0126431	0.0126431	2	0	0	OK	194.77	193.7	-0.00794724	-0.0102105	0.98925	0.997456	no	194.235	-0.00794724	0.00794724	2	0	0
1463	ENSMUSG00000014030	ENSMUSG00000014030	Pax5	4:44524756-44710487	paired box 5 [Source:MGI Symbol;Acc:MGI:97489]	protein_coding	ENSG00000196092	PAX5	OK	104.115	131.031	0.331735	0.349077	0.4817	0.935071	no	117.573	0.331735	0.331735	2	0	0	OK	106.736	193.152	0.855687	1.08611	0.0368	0.305681	no	149.944	0.855687	0.855687	2	0	0
10112	ENSMUSG00000035674	ENSMUSG00000035674	Ndufa3	7:3617372-3629929	NADH:ubiquinone oxidoreductase subunit A3 [Source:MGI Symbol;Acc:MGI:1913341]	protein_coding	ENSG00000170906	NDUFA3	OK	295.879	335.337	0.180604	0.691385	0.38025	0.878262	no	315.608	0.180604	0.180604	2	0	0	OK	173.191	192.338	0.151278	0.523042	0.53375	0.954091	no	182.764	0.151278	0.151278	2	0	0
11	ENSMUSG00000000088	ENSMUSG00000000088	Cox5a	9:57521273-57543184	cytochrome c oxidase subunit 5A [Source:MGI Symbol;Acc:MGI:88474]	protein_coding	ENSG00000178741	COX5A	OK	589.258	565.517	-0.0593293	-0.310626	0.71665	0.988604	no	577.388	-0.0593293	0.0593293	2	0	0	OK	217.828	191.82	-0.183431	-0.886769	0.29835	0.808313	no	204.824	-0.183431	0.183431	2	0	0
6873	ENSMUSG00000028745	ENSMUSG00000028745	Capzb	4:139192898-139291818	capping protein (actin filament) muscle Z-line, beta [Source:MGI Symbol;Acc:MGI:104652]	protein_coding	ENSG00000077549	CAPZB	OK	279.407	307.76	0.13944	0.496473	0.54725	0.958005	no	293.583	0.13944	0.13944	2	0	0	OK	202.57	191.683	-0.079696	-0.285461	0.7371	0.991643	no	197.126	-0.079696	0.079696	2	0	0
5733	ENSMUSG00000026755	ENSMUSG00000026755	Arpc5l	2:38996712-39015877	actin related protein 2/3 complex, subunit 5-like [Source:MGI Symbol;Acc:MGI:1921442]	protein_coding	ENSG00000136950	ARPC5L	OK	227.51	227.92	0.00260125	0.00815073	0.99205	0.998026	no	227.715	0.00260125	0.00260125	2	0	0	OK	216.511	191.56	-0.176644	-0.597013	0.4636	0.929614	no	204.036	-0.176644	0.176644	2	0	0
12451	ENSMUSG00000042079	ENSMUSG00000042079	Hnrnpf	6:117900323-117925622	heterogeneous nuclear ribonucleoprotein F [Source:MGI Symbol;Acc:MGI:2138741]	protein_coding	ENSG00000169813	HNRNPF	OK	200.829	261.02	0.378197	1.23817	0.1469	0.607238	no	230.924	0.378197	0.378197	2	0	0	OK	161.427	191.331	0.245187	0.781618	0.35875	0.862302	no	176.379	0.245187	0.245187	2	0	0
10908	ENSMUSG00000037965	ENSMUSG00000037965	Zc3h7a	16:11136591-11176393	zinc finger CCCH type containing 7 A [Source:MGI Symbol;Acc:MGI:2445044]	protein_coding	ENSG00000122299	ZC3H7A	OK	147.015	137.33	-0.0983181	-0.366122	0.66115	0.979768	no	142.173	-0.0983181	0.0983181	2	0	0	OK	185.732	191.328	0.0428228	0.165121	0.8429	0.992781	no	188.53	0.0428228	0.0428228	2	0	0
17679	ENSMUSG00000063358	ENSMUSG00000063358	Mapk1	16:16983381-17047453	mitogen-activated protein kinase 1 [Source:MGI Symbol;Acc:MGI:1346858]	protein_coding	ENSG00000100030	MAPK1	OK	128.392	134.988	0.0722724	0.249947	0.7634	0.99264	no	131.69	0.0722724	0.0722724	2	0	0	OK	206.022	190.478	-0.113175	-0.412673	0.6258	0.974881	no	198.25	-0.113175	0.113175	2	0	0
13769	ENSMUSG00000046688	ENSMUSG00000046688	Tifa	3:127789804-127838644	TRAF-interacting protein with forkhead-associated domain [Source:MGI Symbol;Acc:MGI:2182965]	protein_coding	ENSG00000145365	TIFA	OK	32.0927	34.9318	0.122296	0.407955	0.63475	0.976524	no	33.5123	0.122296	0.122296	2	0	0	OK	250.42	189.935	-0.398844	-1.86253	0.03075	0.272604	no	220.178	-0.398844	0.398844	2	0	0
7126	ENSMUSG00000029152	ENSMUSG00000029152	Ociad1	5:73292783-73314069	OCIA domain containing 1 [Source:MGI Symbol;Acc:MGI:1915345]	protein_coding	ENSG00000109180	OCIAD1	OK	245.736	251.587	0.0339447	0.172724	0.83795	0.992781	no	248.661	0.0339447	0.0339447	2	0	0	OK	202.923	189.809	-0.0963803	-0.478657	0.5794	0.967552	no	196.366	-0.0963803	0.0963803	2	0	0
377	ENSMUSG00000002102	ENSMUSG00000002102	Psmc3	2:91054008-91070417	proteasome (prosome, macropain) 26S subunit, ATPase 3 [Source:MGI Symbol;Acc:MGI:1098754]	protein_coding	ENSG00000165916	PSMC3	OK	181.289	262.432	0.533653	2.01218	0.01995	0.20554	no	221.861	0.533653	0.533653	2	0	0	OK	145.526	189.73	0.382675	1.34223	0.11725	0.566645	no	167.628	0.382675	0.382675	2	0	0
12119	ENSMUSG00000040990	ENSMUSG00000040990	Sh3kbp1	X:159627271-159978069	SH3-domain kinase binding protein 1 [Source:MGI Symbol;Acc:MGI:1889583]	protein_coding	ENSG00000147010	SH3KBP1	OK	38.3096	51.4224	0.424692	1.78713	0.03555	0.299531	no	44.866	0.424692	0.424692	2	0	0	OK	196.303	188.353	-0.0596436	-0.267012	0.74995	0.992469	no	192.328	-0.0596436	0.0596436	2	0	0
15715	ENSMUSG00000054405	ENSMUSG00000054405	Dnajc8	4:132535549-132553742	DnaJ heat shock protein family (Hsp40) member C8 [Source:MGI Symbol;Acc:MGI:1915848]	protein_coding	ENSG00000126698	DNAJC8	OK	188.508	215.859	0.195462	0.975321	0.249	0.757461	no	202.184	0.195462	0.195462	2	0	0	OK	161.534	188.173	0.220223	1.07497	0.19865	0.692587	no	174.853	0.220223	0.220223	2	0	0
7968	ENSMUSG00000030697	ENSMUSG00000030697	Ppp4c	7:126785865-126792496	protein phosphatase 4, catalytic subunit [Source:MGI Symbol;Acc:MGI:1891763]	protein_coding	ENSG00000149923	PPP4C	OK	163.327	184.417	0.175214	0.740361	0.3618	0.86488	no	173.872	0.175214	0.175214	2	0	0	OK	133.114	187.861	0.496997	2.12982	0.01195	0.144522	no	160.488	0.496997	0.496997	2	0	0
8927	ENSMUSG00000032376	ENSMUSG00000032376	Usp3	9:66514636-66593142	ubiquitin specific peptidase 3 [Source:MGI Symbol;Acc:MGI:2152450]	protein_coding	ENSG00000140455	AC007950.1	OK	56.3204	50.8024	-0.14876	-0.347589	0.67555	0.982165	no	53.5614	-0.14876	0.14876	2	0	0	OK	217.422	187.756	-0.21164	-0.482055	0.55765	0.961414	no	202.589	-0.21164	0.21164	2	0	0
3756	ENSMUSG00000022553	ENSMUSG00000022553	Maf1	15:76351293-76354380	MAF1 homolog, negative regulator of RNA polymerase III [Source:MGI Symbol;Acc:MGI:1916127]	protein_coding	ENSG00000179632	MAF1	OK	93.8183	95.0159	0.0182999	0.0708894	0.93055	0.993298	no	94.4171	0.0182999	0.0182999	2	0	0	OK	176.374	187.448	0.0878513	0.394526	0.63175	0.976415	no	181.911	0.0878513	0.0878513	2	0	0
1541	ENSMUSG00000014956	ENSMUSG00000014956	Ppp1cb	5:32458842-32687057	protein phosphatase 1 catalytic subunit beta [Source:MGI Symbol;Acc:MGI:104871]	protein_coding	ENSG00000213639	PPP1CB	OK	188.73	179.156	-0.0751086	-0.26048	0.7475	0.992469	no	183.943	-0.0751086	0.0751086	2	0	0	OK	211.52	187.04	-0.177444	-0.597828	0.4672	0.930018	no	199.28	-0.177444	0.177444	2	0	0
17166	ENSMUSG00000061032	ENSMUSG00000061032	Rrp1	10:78400383-78413043	ribosomal RNA processing 1 homolog (S. cerevisiae) [Source:MGI Symbol;Acc:MGI:1203500]	protein_coding	ENSG00000160214	RRP1	OK	195.379	211.815	0.116534	0.55021	0.51245	0.946673	no	203.597	0.116534	0.116534	2	0	0	OK	169.327	186.634	0.140393	0.595582	0.4759	0.933549	no	177.981	0.140393	0.140393	2	0	0
1125	ENSMUSG00000007815	ENSMUSG00000007815	Rhoa	9:108302957-108338273	ras homolog family member A [Source:MGI Symbol;Acc:MGI:1096342]	protein_coding	ENSG00000067560	RHOA	OK	165.53	163.248	-0.0200219	-0.10619	0.89875	0.992805	no	164.389	-0.0200219	0.0200219	2	0	0	OK	171.639	185.696	0.113561	0.555312	0.50465	0.943603	no	178.668	0.113561	0.113561	2	0	0
14833	ENSMUSG00000050608	ENSMUSG00000050608	Minos1	4:139101813-139131113	mitochondrial inner membrane organizing system 1 [Source:MGI Symbol;Acc:MGI:1913628]	protein_coding	ENSG00000173436	MICOS10	OK	410.665	450.632	0.133987	0.616501	0.4751	0.933202	no	430.649	0.133987	0.133987	2	0	0	OK	179.92	184.783	0.0384742	0.15842	0.85365	0.992781	no	182.351	0.0384742	0.0384742	2	0	0
16891	ENSMUSG00000059796	ENSMUSG00000059796	Eif4a1	11:69666935-69672423	eukaryotic translation initiation factor 4A1 [Source:MGI Symbol;Acc:MGI:95303]	protein_coding	ENSG00000161960	EIF4A1	OK	505.164	608.702	0.268983	1.04956	0.19765	0.691414	no	556.933	0.268983	0.268983	2	0	0	OK	169.614	184.217	0.119156	0.439845	0.60235	0.973311	no	176.916	0.119156	0.119156	2	0	0
12267	ENSMUSG00000041515	ENSMUSG00000041515	Irf8	8:119910359-124345724	interferon regulatory factor 8 [Source:MGI Symbol;Acc:MGI:96395]	protein_coding	ENSG00000140968	IRF8	OK	174.692	143.275	-0.286026	-0.391665	0.5826	0.968648	no	158.983	-0.286026	0.286026	2	0	0	OK	156.99	184.18	0.230444	0.311523	0.6496	0.978501	no	170.585	0.230444	0.230444	2	0	0
8109	ENSMUSG00000030956	ENSMUSG00000030956	Fam53b	7:130162450-133124354	family with sequence similarity 53, member B [Source:MGI Symbol;Acc:MGI:1925188]	protein_coding	ENSG00000189319	FAM53B	OK	41.1922	49.6953	0.27074	0.498138	0.4626	0.929417	no	45.4438	0.27074	0.27074	2	0	0	OK	225.213	184.168	-0.290265	-0.760643	0.2546	0.762952	no	204.69	-0.290265	0.290265	2	0	0
7435	ENSMUSG00000029649	ENSMUSG00000029649	Pomp	5:147860460-147876456	proteasome maturation protein [Source:MGI Symbol;Acc:MGI:1913787]	protein_coding	ENSG00000132963	POMP	OK	384.702	419.83	0.126064	0.464226	0.58895	0.970253	no	402.266	0.126064	0.126064	2	0	0	OK	202.388	183.711	-0.139691	-0.482548	0.57425	0.966586	no	193.05	-0.139691	0.139691	2	0	0
1196	ENSMUSG00000008855	ENSMUSG00000008855	Hdac5	11:102194431-102230166	histone deacetylase 5 [Source:MGI Symbol;Acc:MGI:1333784]	protein_coding	ENSG00000108840	HDAC5	OK	53.6005	57.2644	0.0953916	0.310386	0.71595	0.988604	no	55.4325	0.0953916	0.0953916	2	0	0	OK	181.684	183.516	0.0144723	0.0510983	0.95215	0.994877	no	182.6	0.0144723	0.0144723	2	0	0
752	ENSMUSG00000004788	ENSMUSG00000004788	Eif2b2	12:85219480-85226628	eukaryotic translation initiation factor 2B, subunit 2 beta [Source:MGI Symbol;Acc:MGI:2145118]	protein_coding	ENSG00000119718	EIF2B2	OK	114.371	121.784	0.0906043	0.326312	0.69945	0.985825	no	118.078	0.0906043	0.0906043	2	0	0	OK	175.997	183.438	0.0597376	0.238974	0.773	0.99264	no	179.718	0.0597376	0.0597376	2	0	0
5293	ENSMUSG00000025982	ENSMUSG00000025982	Sf3b1	1:54985168-55027481	splicing factor 3b, subunit 1 [Source:MGI Symbol;Acc:MGI:1932339]	protein_coding	ENSG00000115524	SF3B1	OK	141.612	143.097	0.0150498	0.0547745	0.94305	0.994117	no	142.355	0.0150498	0.0150498	2	0	0	OK	238.47	183.11	-0.381097	-1.22087	0.11445	0.56041	no	210.79	-0.381097	0.381097	2	0	0
1103	ENSMUSG00000007564	ENSMUSG00000007564	Ppp2r1a	17:20945310-20965916	protein phosphatase 2, regulatory subunit A, alpha [Source:MGI Symbol;Acc:MGI:1926334]	protein_coding	ENSG00000105568	PPP2R1A	OK	165.277	165.637	0.00314165	0.0109642	0.98895	0.997456	no	165.457	0.00314165	0.00314165	2	0	0	OK	176.144	183.032	0.0553405	0.194359	0.82425	0.992781	no	179.588	0.0553405	0.0553405	2	0	0
20118	ENSMUSG00000071715	ENSMUSG00000071715	Ncf4	15:78244800-78262580	neutrophil cytosolic factor 4 [Source:MGI Symbol;Acc:MGI:109186]	protein_coding	ENSG00000100365	NCF4	OK	115.667	111.979	-0.0467475	-0.181519	0.8319	0.992781	no	113.823	-0.0467475	0.0467475	2	0	0	OK	192.53	182.995	-0.0732789	-0.294598	0.73355	0.990864	no	187.762	-0.0732789	0.0732789	2	0	0
11460	ENSMUSG00000039218	ENSMUSG00000039218	Srrm2	17:23790531-23829136	serine/arginine repetitive matrix 2 [Source:MGI Symbol;Acc:MGI:1923206]	protein_coding	ENSG00000167978	SRRM2	OK	266.496	269.624	0.0168321	0.039784	0.95945	0.995023	no	268.06	0.0168321	0.0168321	2	0	0	OK	170.516	182.689	0.0994808	0.212186	0.7946	0.992781	no	176.602	0.0994808	0.0994808	2	0	0
10637	ENSMUSG00000037236	ENSMUSG00000037236	Matr3	18:35553370-35598573	matrin 3 [Source:MGI Symbol;Acc:MGI:1298379]	protein_coding	NA	NA	OK	153.701	172.148	0.163527	0.511824	0.52955	0.951913	no	162.924	0.163527	0.163527	2	0	0	OK	219.277	182.517	-0.264724	-0.901316	0.27345	0.784157	no	200.897	-0.264724	0.264724	2	0	0
12615	ENSMUSG00000042524	ENSMUSG00000042524	Sun2	15:79724069-79742536	Sad1 and UNC84 domain containing 2 [Source:MGI Symbol;Acc:MGI:2443011]	protein_coding	ENSG00000100242	SUN2	OK	57.9162	59.0635	0.028301	0.0388273	0.92345	0.993025	no	58.4899	0.028301	0.028301	2	0	0	OK	191.891	182.502	-0.0723752	-0.0808467	0.90985	0.992805	no	187.197	-0.0723752	0.0723752	2	0	0
4765	ENSMUSG00000024937	ENSMUSG00000024937	Ehbp1l1	19:5707375-5726317	EH domain binding protein 1-like 1 [Source:MGI Symbol;Acc:MGI:3612340]	protein_coding	ENSG00000173442	EHBP1L1	OK	54.3446	63.9489	0.234784	0.741561	0.3776	0.876504	no	59.1467	0.234784	0.234784	2	0	0	OK	142.719	182.49	0.354634	1.27204	0.12125	0.573883	no	162.605	0.354634	0.354634	2	0	0
5806	ENSMUSG00000026864	ENSMUSG00000026864	Hspa5	2:34771969-34777547	heat shock protein 5 [Source:MGI Symbol;Acc:MGI:95835]	protein_coding	ENSG00000044574	HSPA5	OK	337.389	395.773	0.230261	0.992581	0.1814	0.666074	no	366.581	0.230261	0.230261	2	0	0	OK	204.255	181.029	-0.174151	-0.753841	0.3216	0.831494	no	192.642	-0.174151	0.174151	2	0	0
12396	ENSMUSG00000041881	ENSMUSG00000041881	Ndufa7	17:33824571-33838317	NADH:ubiquinone oxidoreductase subunit A7 [Source:MGI Symbol;Acc:MGI:1913666]	protein_coding	NA	NA	OK	314.022	279.985	-0.165519	-0.800676	0.3465	0.852581	no	297.004	-0.165519	0.165519	2	0	0	OK	122.04	180.697	0.566213	2.42446	0.005	0.080162	no	151.369	0.566213	0.566213	2	0	0
1330	ENSMUSG00000010608	ENSMUSG00000010608	Rbm25	12:83631235-83683123	RNA binding motif protein 25 [Source:MGI Symbol;Acc:MGI:1914289]	protein_coding	ENSG00000119707	RBM25	OK	153.049	155.297	0.0210354	0.0550541	0.92735	0.993025	no	154.173	0.0210354	0.0210354	2	0	0	OK	184.957	180.357	-0.0363342	-0.0884594	0.8896	0.992805	no	182.657	-0.0363342	0.0363342	2	0	0
1560	ENSMUSG00000015120	ENSMUSG00000015120	Ube2i	17:25261915-25274622	ubiquitin-conjugating enzyme E2I [Source:MGI Symbol;Acc:MGI:107365]	protein_coding	ENSG00000103275	UBE2I	OK	189.003	208.016	0.13829	0.558704	0.51045	0.946011	no	198.51	0.13829	0.13829	2	0	0	OK	163.736	180.018	0.136771	0.542227	0.5214	0.950048	no	171.877	0.136771	0.136771	2	0	0
9452	ENSMUSG00000033793	ENSMUSG00000033793	Atp6v1h	1:4909575-5162529	ATPase, H+ transporting, lysosomal V1 subunit H [Source:MGI Symbol;Acc:MGI:1914864]	protein_coding	ENSG00000047249	ATP6V1H	OK	56.4912	56.1294	-0.00926969	-0.0466367	0.9527	0.994937	no	56.3103	-0.00926969	0.00926969	2	0	0	OK	183.141	180	-0.0249618	-0.131442	0.8744	0.992781	no	181.57	-0.0249618	0.0249618	2	0	0
3689	ENSMUSG00000022450	ENSMUSG00000022450	Ndufa6	15:82350139-82354322	NADH:ubiquinone oxidoreductase subunit A6 [Source:MGI Symbol;Acc:MGI:1914380]	protein_coding	ENSG00000184983	NDUFA6	OK	287.745	263.898	-0.124813	-0.529031	0.53595	0.954785	no	275.822	-0.124813	0.124813	2	0	0	OK	159.1	179.462	0.173739	0.680577	0.42235	0.907497	no	169.281	0.173739	0.173739	2	0	0
1973	ENSMUSG00000018654	ENSMUSG00000018654	Ikzf1	11:11642202-11772926	IKAROS family zinc finger 1 [Source:MGI Symbol;Acc:MGI:1342540]	protein_coding	ENSG00000185811	IKZF1	OK	52.6898	79.0034	0.584389	2.14613	0.0026	0.0494895	yes	65.8466	0.584389	0.584389	2	0	0	OK	196.353	179.33	-0.130836	-0.499519	0.46255	0.929416	no	187.841	-0.130836	0.130836	2	0	0
7532	ENSMUSG00000029823	ENSMUSG00000029823	Luc7l2	6:38551333-38609470	LUC7-like 2 (S. cerevisiae) [Source:MGI Symbol;Acc:MGI:2183260]	protein_coding	ENSG00000146963	LUC7L2	OK	132.87	108.011	-0.298839	-1.3438	0.11485	0.560714	no	120.441	-0.298839	0.298839	2	0	0	OK	166.745	179.264	0.104448	0.454758	0.59295	0.971235	no	173.005	0.104448	0.104448	2	0	0
7464	ENSMUSG00000029687	ENSMUSG00000029687	Ezh2	6:47530138-47595341	enhancer of zeste 2 polycomb repressive complex 2 subunit [Source:MGI Symbol;Acc:MGI:107940]	protein_coding	ENSG00000106462	EZH2	OK	411.638	395.515	-0.0576415	-0.208866	0.8035	0.992781	no	403.577	-0.0576415	0.0576415	2	0	0	OK	209.156	179.203	-0.222986	-0.799075	0.3495	0.8553	no	194.18	-0.222986	0.222986	2	0	0
222	ENSMUSG00000001248	ENSMUSG00000001248	Gramd1a	7:31130126-31170641	GRAM domain containing 1A [Source:MGI Symbol;Acc:MGI:105490]	protein_coding	ENSG00000089351	GRAMD1A	OK	77.4049	65.1281	-0.249146	-0.929282	0.2712	0.781678	no	71.2665	-0.249146	0.249146	2	0	0	OK	191.532	178.936	-0.0981421	-0.38117	0.65595	0.978718	no	185.234	-0.0981421	0.0981421	2	0	0
8896	ENSMUSG00000032330	ENSMUSG00000032330	Cox7a2	9:79755360-79759878	cytochrome c oxidase subunit 7A2 [Source:MGI Symbol;Acc:MGI:1316715]	protein_coding	ENSG00000112695	COX7A2	OK	383.017	400.326	0.0637667	0.327653	0.70405	0.986807	no	391.672	0.0637667	0.0637667	2	0	0	OK	164.323	178.918	0.122768	0.577597	0.4966	0.940995	no	171.62	0.122768	0.122768	2	0	0
6117	ENSMUSG00000027435	ENSMUSG00000027435	Cd93	2:148436639-148443563	CD93 antigen [Source:MGI Symbol;Acc:MGI:106664]	protein_coding	ENSG00000125810	CD93	OK	38.8553	46.3718	0.255138	1.39576	0.1003	0.526393	no	42.6136	0.255138	0.255138	2	0	0	OK	207.851	178.302	-0.221222	-1.19333	0.1623	0.635701	no	193.077	-0.221222	0.221222	2	0	0
4476	ENSMUSG00000024404	ENSMUSG00000024404	Riok3	18:12128740-12157387	RIO kinase 3 [Source:MGI Symbol;Acc:MGI:1914128]	protein_coding	ENSG00000101782	RIOK3	OK	133.112	121.544	-0.131155	-0.267827	0.7483	0.992469	no	127.328	-0.131155	0.131155	2	0	0	OK	204.326	178.201	-0.197364	-0.414657	0.62705	0.975038	no	191.263	-0.197364	0.197364	2	0	0
11209	ENSMUSG00000038612	ENSMUSG00000038612	Mcl1	3:95658787-95663176	myeloid cell leukemia sequence 1 [Source:MGI Symbol;Acc:MGI:101769]	protein_coding	ENSG00000143384	MCL1	OK	77.9739	86.7015	0.153066	0.836407	0.32675	0.835353	no	82.3377	0.153066	0.153066	2	0	0	OK	202.491	178.098	-0.185182	-1.01927	0.23335	0.738066	no	190.295	-0.185182	0.185182	2	0	0
4644	ENSMUSG00000024735	ENSMUSG00000024735	Prpf19	19:10895230-10909559	pre-mRNA processing factor 19 [Source:MGI Symbol;Acc:MGI:106247]	protein_coding	ENSG00000110107	PRPF19	OK	264.164	366.472	0.472267	0.966179	0.2511	0.759642	no	315.318	0.472267	0.472267	2	0	0	OK	204.894	177.951	-0.203399	-0.416233	0.62505	0.974576	no	191.423	-0.203399	0.203399	2	0	0
4468	ENSMUSG00000024393	ENSMUSG00000024393	Prrc2a	17:35149075-35164897	proline-rich coiled-coil 2A [Source:MGI Symbol;Acc:MGI:1915467]	protein_coding	ENSG00000204469	PRRC2A	OK	212.385	215.123	0.0184812	0.0520891	0.9485	0.994117	no	213.754	0.0184812	0.0184812	2	0	0	OK	163.533	177.885	0.12136	0.307268	0.7049	0.986849	no	170.709	0.12136	0.12136	2	0	0
9055	ENSMUSG00000032580	ENSMUSG00000032580	Rbm5	9:107740370-107770996	RNA binding motif protein 5 [Source:MGI Symbol;Acc:MGI:1933204]	protein_coding	ENSG00000003756	RBM5	OK	64.7533	65.1876	0.00964318	0.0246521	0.97655	0.995717	no	64.9704	0.00964318	0.00964318	2	0	0	OK	183.87	177.798	-0.0484464	-0.12617	0.87145	0.992781	no	180.834	-0.0484464	0.0484464	2	0	0
12329	ENSMUSG00000041697	ENSMUSG00000041697	Cox6a1	5:115345641-115348981	cytochrome c oxidase subunit 6A1 [Source:MGI Symbol;Acc:MGI:103099]	protein_coding	ENSG00000111775	COX6A1	OK	509.514	547.421	0.10353	0.558264	0.5079	0.944763	no	528.467	0.10353	0.10353	2	0	0	OK	155.663	177.75	0.191431	0.956703	0.2617	0.77034	no	166.707	0.191431	0.191431	2	0	0
20099	ENSMUSG00000071655	ENSMUSG00000071655	Ubxn1	19:8871495-8875863	UBX domain protein 1 [Source:MGI Symbol;Acc:MGI:1289301]	protein_coding	ENSG00000162191	UBXN1	OK	169.215	164.461	-0.0411174	-0.218344	0.7992	0.992781	no	166.838	-0.0411174	0.0411174	2	0	0	OK	156.07	177.593	0.186378	0.975778	0.2537	0.762442	no	166.832	0.186378	0.186378	2	0	0
12613	ENSMUSG00000042520	ENSMUSG00000042520	Ubap2l	3:89995445-90068347	ubiquitin-associated protein 2-like [Source:MGI Symbol;Acc:MGI:1921633]	protein_coding	ENSG00000143569	UBAP2L	OK	87.1782	110.838	0.346411	0.844511	0.2686	0.778564	no	99.0081	0.346411	0.346411	2	0	0	OK	215.884	177.22	-0.284721	-0.55955	0.4589	0.927477	no	196.552	-0.284721	0.284721	2	0	0
247	ENSMUSG00000001419	ENSMUSG00000001419	Mef2d	3:88142371-88177785	myocyte enhancer factor 2D [Source:MGI Symbol;Acc:MGI:99533]	protein_coding	ENSG00000116604	MEF2D	OK	75.0466	93.4999	0.317178	0.978432	0.1483	0.608804	no	84.2732	0.317178	0.317178	2	0	0	OK	170.372	176.898	0.0542298	0.176975	0.7886	0.992781	no	173.635	0.0542298	0.0542298	2	0	0
11884	ENSMUSG00000040385	ENSMUSG00000040385	Ppp1ca	19:4192064-4201662	protein phosphatase 1 catalytic subunit alpha [Source:MGI Symbol;Acc:MGI:103016]	protein_coding	ENSG00000172531	PPP1CA	OK	283.575	313.032	0.142582	0.626758	0.4638	0.929614	no	298.303	0.142582	0.142582	2	0	0	OK	146.761	176.677	0.267654	1.09156	0.19525	0.688003	no	161.719	0.267654	0.267654	2	0	0
3055	ENSMUSG00000021356	ENSMUSG00000021356	Irf4	13:30749225-30766976	interferon regulatory factor 4 [Source:MGI Symbol;Acc:MGI:1096873]	protein_coding	ENSG00000137265	IRF4	OK	31.4371	44.6387	0.505824	2.15453	0.0026	0.0494895	yes	38.0379	0.505824	0.505824	2	0	0	OK	184.692	176.621	-0.0644645	-0.27965	0.6834	0.98397	no	180.656	-0.0644645	0.0644645	2	0	0
710	ENSMUSG00000004455	ENSMUSG00000004455	Ppp1cc	5:122158277-122175273	protein phosphatase 1 catalytic subunit gamma [Source:MGI Symbol;Acc:MGI:104872]	protein_coding	ENSG00000186298	PPP1CC	OK	186.55	207.285	0.152054	0.564565	0.5122	0.946552	no	196.918	0.152054	0.152054	2	0	0	OK	174.861	176.521	0.0136273	0.0507119	0.9527	0.994937	no	175.691	0.0136273	0.0136273	2	0	0
6298	ENSMUSG00000027775	ENSMUSG00000027775	Mfsd1	3:67582740-67604237	major facilitator superfamily domain containing 1 [Source:MGI Symbol;Acc:MGI:1914118]	protein_coding	ENSG00000118855	MFSD1	OK	34.8272	49.5137	0.507611	1.92767	0.0226	0.222832	no	42.1705	0.507611	0.507611	2	0	0	OK	161.627	176.157	0.124191	0.509857	0.5388	0.955578	no	168.892	0.124191	0.124191	2	0	0
7623	ENSMUSG00000030067	ENSMUSG00000030067	Foxp1	6:98925337-99666797	forkhead box P1 [Source:MGI Symbol;Acc:MGI:1914004]	protein_coding	NA	NA	OK	65.9355	67.5387	0.0346605	0.054988	0.9432	0.994117	no	66.7371	0.0346605	0.0346605	2	0	0	OK	184.554	176.105	-0.0676037	-0.123677	0.87155	0.992781	no	180.329	-0.0676037	0.0676037	2	0	0
17799	ENSMUSG00000063870	ENSMUSG00000063870	Chd4	6:125095980-125130591	chromodomain helicase DNA binding protein 4 [Source:MGI Symbol;Acc:MGI:1344380]	protein_coding	ENSG00000111642	CHD4	OK	119.333	139.198	0.22215	0.793414	0.3008	0.810436	no	129.266	0.22215	0.22215	2	0	0	OK	182.824	176.072	-0.0542899	-0.204862	0.7904	0.992781	no	179.448	-0.0542899	0.0542899	2	0	0
844	ENSMUSG00000005442	ENSMUSG00000005442	Cic	7:25267703-25294159	capicua transcriptional repressor [Source:MGI Symbol;Acc:MGI:1918972]	protein_coding	ENSG00000079432	CIC	OK	86.1852	70.3521	-0.292846	-0.441069	0.4615	0.92906	no	78.2686	-0.292846	0.292846	2	0	0	OK	162.313	175.761	0.114843	0.181266	0.7885	0.992781	no	169.037	0.114843	0.114843	2	0	0
384	ENSMUSG00000002111	ENSMUSG00000002111	Spi1	2:91082389-91115756	spleen focus forming virus (SFFV) proviral integration oncogene [Source:MGI Symbol;Acc:MGI:98282]	protein_coding	ENSG00000066336	SPI1	OK	77.9298	102.592	0.396678	1.41497	0.09725	0.517462	no	90.2609	0.396678	0.396678	2	0	0	OK	149.364	175.608	0.23352	0.865381	0.3055	0.815544	no	162.486	0.23352	0.23352	2	0	0
3703	ENSMUSG00000022472	ENSMUSG00000022472	Desi1	15:81987834-82040085	desumoylating isopeptidase 1 [Source:MGI Symbol;Acc:MGI:106313]	protein_coding	ENSG00000100418	DESI1	OK	44.7357	53.0733	0.246558	0.596257	0.4681	0.93017	no	48.9045	0.246558	0.246558	2	0	0	OK	251.676	175.521	-0.519925	-1.33229	0.1007	0.527756	no	213.599	-0.519925	0.519925	2	0	0
908	ENSMUSG00000005873	ENSMUSG00000005873	Reep5	18:34344884-34374070	receptor accessory protein 5 [Source:MGI Symbol;Acc:MGI:1270152]	protein_coding	ENSG00000129625	REEP5	OK	221.437	199.44	-0.150938	-0.553276	0.5112	0.946189	no	210.439	-0.150938	0.150938	2	0	0	OK	144.524	175.014	0.276163	0.87016	0.31135	0.821251	no	159.769	0.276163	0.276163	2	0	0
11515	ENSMUSG00000039361	ENSMUSG00000039361	Picalm	7:90130212-90213465	phosphatidylinositol binding clathrin assembly protein [Source:MGI Symbol;Acc:MGI:2385902]	protein_coding	ENSG00000073921	PICALM	OK	142.598	150.718	0.0799024	0.228381	0.76345	0.99264	no	146.658	0.0799024	0.0799024	2	0	0	OK	205.518	175.005	-0.231868	-0.522009	0.4944	0.940205	no	190.262	-0.231868	0.231868	2	0	0
759	ENSMUSG00000004837	ENSMUSG00000004837	Grap	11:61653264-61720826	GRB2-related adaptor protein [Source:MGI Symbol;Acc:MGI:1918770]	protein_coding	NA	NA	OK	28.7751	31.1397	0.113934	0.122894	0.74645	0.992469	no	29.9574	0.113934	0.113934	2	0	0	OK	139.29	174.968	0.329	0.5201	0.24875	0.757243	no	157.129	0.329	0.329	2	0	0
[truncated: 20,910 more rows]

## Sheet: GO_up-regulated in Lig4-Lin37
GO analysis of genes up-regulated in imatinib-treated Lig4-/-:Lin37-/- abl pre-B cells
Analysis Type:	PANTHER Overrepresentation Test (Released 20210224)
Annotation Version and Release Date:	GO Ontology database DOI: 10.5281/zenodo.4735677 Released 2021-05-01
[truncated: 238 more rows]
