# Supplementary material for: LIN37-DREAM prevents DNA end resection and homologous recombination at DNA double-strand breaks in quiescent cells
Source: eLife. 2021 Sep 3;10:e68466. doi: 10.7554/eLife.68466 (PMC8416021; doi:10.7554/eLife.68466)
Supplement: Figure 7—source data 1. — GO, gene ontology; RNA-Seq, RNA sequencing. [file elife-68466-fig7-data1.xlsx]

## Sheet: all expressed genes
EnsemblID	baseMean	FoldChange	log2FoldChange	lfcSE	stat	pvalue	padj	Lig4a-G1	Lig4b-G1	Lig4-Lin37.6_G1	Lig4-Lin37.42_G1	chromosome_name	start_position	end_position	strand	entrezgene_id	gene_biotype	external_gene_name	description
ENSMUSG00000000001	9595.92	-1.08203	-0.113735	0.0858849	-1.32427	0.185414	0.547745	8964.21	9470.95	9962.91	9985.59	3	108014596	108053462	-1	14679	protein_coding	Gnai3	guanine nucleotide binding protein (G protein), alpha inhibiting 3 [Source:MGI Symbol;Acc:MGI:95773]
ENSMUSG00000000028	1468.31	-2.26898	-1.18204	0.11558	-10.227	1.5003e-24	1.56743e-22	913.838	883.18	2080.16	1996.07	16	18599197	18630737	-1	12544	protein_coding	Cdc45	cell division cycle 45 [Source:MGI Symbol;Acc:MGI:1338073]
ENSMUSG00000000056	2704.89	1.27093	0.345884	0.136028	2.54274	0.0109988	0.0859987	3033.94	3020.27	2044.68	2720.68	11	121128079	121146682	1	67608	protein_coding	Narf	nuclear prelamin A recognition factor [Source:MGI Symbol;Acc:MGI:1914858]
ENSMUSG00000000058	1069.51	-1.08217	-0.113925	0.12578	-0.90575	0.365068	0.747408	1018.12	1036.16	1074.62	1149.13	6	17281184	17289114	1	12390	protein_coding	Cav2	caveolin 2 [Source:MGI Symbol;Acc:MGI:107571]
ENSMUSG00000000078	15188.3	-1.33056	-0.41203	0.128631	-3.20319	0.00135912	0.0168717	11071.4	14995.3	17644	17042.4	13	5911481	5920393	1	23849	protein_coding	Klf6	Kruppel-like factor 6 [Source:MGI Symbol;Acc:MGI:1346318]
ENSMUSG00000000085	506.427	1.69064	0.75757	0.588517	1.28725	0.198006	0.56772	635.386	637.279	225.008	528.034	4	120262478	120387383	1	29871	protein_coding	Scmh1	sex comb on midleg homolog 1 [Source:MGI Symbol;Acc:MGI:1352762]
ENSMUSG00000000088	2295.04	1.052	0.0731409	0.109183	0.669893	0.502926	0.839863	2327.6	2379.24	2361.18	2112.14	9	57428557	57439709	1	12858	protein_coding	Cox5a	cytochrome c oxidase subunit 5A [Source:MGI Symbol;Acc:MGI:88474]
ENSMUSG00000000093	6.02446	-1.44451	-0.530584	1.3573	-0.390911	0.695863		3.22531	6.56988	2.80093	11.5017	11	85723377	85732774	1	21385	protein_coding	Tbx2	T-box 2 [Source:MGI Symbol;Acc:MGI:98494]
ENSMUSG00000000131	6086.12	1.04021	0.0568686	0.0938355	0.606046	0.544484	0.862939	5990.47	6420.65	5773.65	6159.7	7	125700887	125799673	-1	74204	protein_coding	Xpo6	exportin 6 [Source:MGI Symbol;Acc:MGI:2429950]
ENSMUSG00000000134	2250.67	-1.17176	-0.228678	0.119434	-1.91469	0.0555321	0.268705	2092.15	2052.62	2214.6	2643.31	X	7628799	7641441	1	209446	protein_coding	Tfe3	transcription factor E3 [Source:MGI Symbol;Acc:MGI:98511]
ENSMUSG00000000142	8.46062	-1.86554	-0.899595	1.15692	-0.777579	0.436817		4.30041	7.50844	16.8056	5.22806	11	108811175	108841609	1	12006	protein_coding	Axin2	axin 2 [Source:MGI Symbol;Acc:MGI:1270862]
ENSMUSG00000000148	2064.59	-1.06438	-0.0900136	0.124489	-0.723063	0.469641	0.820353	2068.5	1931.55	1930.77	2327.53	5	140690766	140705134	1	231841	protein_coding	Brat1	BRCA1-associated ATM activator 1 [Source:MGI Symbol;Acc:MGI:1891679]
ENSMUSG00000000149	1851.18	-1.03864	-0.0546935	0.129491	-0.422374	0.672752	0.914233	1850.25	1781.38	1687.09	2086	5	140744163	140816186	-1	14673	protein_coding	Gna12	guanine nucleotide binding protein, alpha 12 [Source:MGI Symbol;Acc:MGI:95767]
ENSMUSG00000000157	8.96562	-1.01657	-0.0237072	1.08535	-0.0218428	0.982573		6.45062	11.2627	5.60186	12.5473	16	96223488	96244819	-1	16415	protein_coding	Itgb2l	integrin beta 2-like [Source:MGI Symbol;Acc:MGI:1277979]
ENSMUSG00000000159	43.361	-2.01591	-1.01143	0.536201	-1.88629	0.0592565	0.279528	22.5772	34.7265	42.9476	73.1928	16	96162868	96223321	1	72058	protein_coding	Igsf5	immunoglobulin superfamily, member 5 [Source:MGI Symbol;Acc:MGI:1919308]
ENSMUSG00000000167	60.68	-1.15578	-0.208862	0.426041	-0.490238	0.623965	0.898152	51.6049	61.006	74.6915	55.4174	9	50528621	50536300	1	72614	protein_coding	Pih1d2	PIH1 domain containing 2 [Source:MGI Symbol;Acc:MGI:1919864]
ENSMUSG00000000168	3058.84	1.18006	0.238856	0.0959246	2.49004	0.0127728	0.0961005	3338.2	3284.94	2821.47	2790.74	9	50545933	50571080	-1	235339	protein_coding	Dlat	dihydrolipoamide S-acetyltransferase (E2 component of pyruvate dehydrogenase complex) [Source:MGI Symbol;Acc:MGI:2385311]
ENSMUSG00000000171	6466.67	1.00481	0.00692819	0.0909953	0.0761379	0.939309	0.98741	6409.76	6553.93	6215.27	6687.73	9	50507657	50515112	-1	66925	protein_coding	Sdhd	succinate dehydrogenase complex, subunit D, integral membrane protein [Source:MGI Symbol;Acc:MGI:1914175]
ENSMUSG00000000184	18422.6	1.29847	0.376813	0.0886936	4.24848	2.15222e-05	0.000500889	21706.3	19924.6	16425.6	15634	6	127102125	127129156	-1	12444	protein_coding	Ccnd2	cyclin D2 [Source:MGI Symbol;Acc:MGI:88314]
ENSMUSG00000000194	3093.98	1.02118	0.0302317	0.101769	0.297061	0.76642	0.945018	3031.79	3220.18	2948.45	3175.52	2	31042328	31108787	1	277463	protein_coding	Gpr107	G protein-coupled receptor 107 [Source:MGI Symbol;Acc:MGI:2139054]
ENSMUSG00000000202	6.37995	-1.21803	-0.284547	1.32277	-0.215115	0.829678		9.67593	1.87711	5.60186	8.36489	11	114682043	114686771	-1	72014	protein_coding	Btbd17	BTB (POZ) domain containing 17 [Source:MGI Symbol;Acc:MGI:1919264]
ENSMUSG00000000204	12.9072	-2.0283	-1.02027	0.886083	-1.15144	0.249553	0.634883	8.60082	8.44699	16.8056	17.7754	11	83066012	83081042	1	20558	protein_coding	Slfn4	schlafen 4 [Source:MGI Symbol;Acc:MGI:1329010]
ENSMUSG00000000223	26.9949	-5.22315	-2.38492	0.728811	-3.27234	0.00106659	0.0139462	11.8261	5.63133	29.8766	60.6455	X	133305300	133357322	1	13497	protein_coding	Drp2	dystrophin related protein 2 [Source:MGI Symbol;Acc:MGI:107432]
ENSMUSG00000000244	3302.46	1.39225	0.477413	0.106293	4.49147	7.07349e-06	0.000186795	3982.18	3705.41	2603.93	2918.3	7	142558783	142573381	1	27027	protein_coding	Tspan32	tetraspanin 32 [Source:MGI Symbol;Acc:MGI:1350360]
ENSMUSG00000000247	389.957	1.20898	0.27379	0.179232	1.52758	0.126618	0.440409	440.792	412.964	346.382	359.69	2	38229293	38259745	1	16870	protein_coding	Lhx2	LIM homeobox protein 2 [Source:MGI Symbol;Acc:MGI:96785]
ENSMUSG00000000248	4.83889	1.0228	0.0325188	1.47004	0.0221211	0.982351		3.22531	6.56988	7.46915	2.09122	6	128911344	128961670	1	70809	protein_coding	Clec2g	C-type lectin domain family 2, member g [Source:MGI Symbol;Acc:MGI:1918059]
ENSMUSG00000000253	3.30743	3.39192	1.7621	1.78544	0.986929	0.323677		6.45062	3.75422	0.933644	2.09122	13	45660920	45707276	1	66355	protein_coding	Gmpr	guanosine monophosphate reductase [Source:MGI Symbol;Acc:MGI:1913605]
ENSMUSG00000000275	5435.77	-1.14522	-0.195629	0.0908601	-2.15307	0.0313128	0.183305	4917.52	5217.42	5765.25	5842.88	11	88890202	88911119	1	217069	protein_coding	Trim25	tripartite motif-containing 25 [Source:MGI Symbol;Acc:MGI:102749]
ENSMUSG00000000276	949.086	-1.04052	-0.0573023	0.162457	-0.352722	0.724297	0.931844	984.794	876.61	1102.63	832.307	11	88926005	88957676	-1	56077	protein_coding	Dgke	diacylglycerol kinase, epsilon [Source:MGI Symbol;Acc:MGI:1889276]
ENSMUSG00000000278	3172.77	-1.13075	-0.177283	0.0994259	-1.78307	0.0745755	0.323945	2959.76	2995.87	3237.88	3497.57	11	88814846	88846291	-1	74617	protein_coding	Scpep1	serine carboxypeptidase 1 [Source:MGI Symbol;Acc:MGI:1921867]
ENSMUSG00000000282	1742.1	-1.00879	-0.0126283	0.112503	-0.112249	0.910626	0.980722	1693.29	1775.75	1815.94	1683.43	11	74721746	74736551	1	17428	protein_coding	Mnt	max binding protein [Source:MGI Symbol;Acc:MGI:109150]
ENSMUSG00000000290	4872.22	-1.15614	-0.209311	0.117904	-1.77527	0.0758539	0.327511	4564.89	4473.15	4647.68	5803.14	10	77366086	77401542	1	16414	protein_coding	Itgb2	integrin beta 2 [Source:MGI Symbol;Acc:MGI:96611]
ENSMUSG00000000295	1208.29	1.3254	0.406427	0.121724	3.33894	0.000840992	0.0114215	1387.96	1366.54	1002.73	1075.93	10	31189379	31204200	1	69692	protein_coding	Hddc2	HD domain containing 2 [Source:MGI Symbol;Acc:MGI:1916942]
ENSMUSG00000000301	94.586	1.0863	0.119425	0.363458	0.328581	0.742473	0.937291	96.7593	100.425	111.104	70.056	11	59861440	59937315	-1	18618	protein_coding	Pemt	phosphatidylethanolamine N-methyltransferase [Source:MGI Symbol;Acc:MGI:104535]
ENSMUSG00000000303	26.4208	9.58125	3.26021	0.758883	4.29607	1.73854e-05	0.000414728	43.0041	52.5591	2.80093	7.31928	8	107329983	107396878	1	12550	protein_coding	Cdh1	cadherin 1 [Source:MGI Symbol;Acc:MGI:88354]
ENSMUSG00000000317	55.9781	-1.31353	-0.393448	0.439103	-0.896028	0.370238	0.750853	52.6801	44.1121	56.0186	71.1016	11	70114954	70120624	-1	12029	protein_coding	Bcl6b	B cell CLL/lymphoma 6, member B [Source:MGI Symbol;Acc:MGI:1278332]
ENSMUSG00000000320	8.39789	1.02738	0.0389702	1.08494	0.0359192	0.971347		8.60082	8.44699	10.2701	6.27367	11	70132283	70146179	-1	11684	protein_coding	Alox12	arachidonate 12-lipoxygenase [Source:MGI Symbol;Acc:MGI:87998]
ENSMUSG00000000325	5.26361	-1.25379	-0.326295	1.42134	-0.229568	0.818427		7.52572	1.87711	7.46915	4.18245
ENSMUSG00000000339	2304.76	-1.02817	-0.0400845	0.106778	-0.375402	0.707362	0.92573	2178.16	2367.03	2389.19	2284.66	3	116282612	116301857	-1	66368	protein_coding	Rtca	RNA 3'-terminal phosphate cyclase [Source:MGI Symbol;Acc:MGI:1913618]
ENSMUSG00000000340	2394.69	1.11095	0.1518	0.109444	1.38701	0.165438	0.513757	2456.61	2584.78	2393.86	2143.5	3	116306719	116343630	1	13171	protein_coding	Dbt	dihydrolipoamide branched chain transacylase E2 [Source:MGI Symbol;Acc:MGI:105386]
ENSMUSG00000000346	9841.7	1.0675	0.0942422	0.086072	1.09492	0.27355	0.663278	10125.3	10200.2	9244.94	9796.33	15	100513230	100518642	1	23994	protein_coding	Dazap2	DAZ associated protein 2 [Source:MGI Symbol;Acc:MGI:1344344]
ENSMUSG00000000355	2413.43	1.11192	0.153057	0.10244	1.49411	0.135148	0.456328	2485.64	2596.98	2330.37	2240.75	X	37689455	37702303	1	68995	protein_coding	Mcts1	malignant T cell amplified sequence 1 [Source:MGI Symbol;Acc:MGI:1916245]
ENSMUSG00000000374	2458.18	-1.03958	-0.0560019	0.105402	-0.531317	0.595199	0.885471	2440.48	2380.17	2393.86	2618.21	10	78022559	78080475	-1	216131	protein_coding	Trappc10	trafficking protein particle complex 10 [Source:MGI Symbol;Acc:MGI:1336209]
ENSMUSG00000000378	2497.8	1.05259	0.073939	0.101496	0.728495	0.466311	0.818788	2569.5	2553.81	2366.79	2501.1	11	6496887	6546744	1	216527	protein_coding	Ccm2	cerebral cavernous malformation 2 [Source:MGI Symbol;Acc:MGI:2384924]
ENSMUSG00000000384	5307.43	1.01941	0.0277352	0.0911198	0.304382	0.760837	0.942926	5410.99	5305.65	5105.16	5407.9	11	6565598	6576067	-1	21379	protein_coding	Tbrg4	transforming growth factor beta regulated gene 4 [Source:MGI Symbol;Acc:MGI:1100868]
ENSMUSG00000000399	5218.7	-1.0042	-0.00604158	0.0921451	-0.065566	0.947723	0.989374	5051.91	5362.9	5137.84	5322.16	6	126798684	126826099	-1	66108	protein_coding	Ndufa9	NADH:ubiquinone oxidoreductase subunit A9 [Source:MGI Symbol;Acc:MGI:1913358]
ENSMUSG00000000409	1492.67	1.1349	0.182569	0.11464	1.59253	0.111265	0.409918	1627.71	1546.74	1427.54	1368.71	4	129442137	129467434	-1	16818	protein_coding	Lck	lymphocyte protein tyrosine kinase [Source:MGI Symbol;Acc:MGI:96756]
ENSMUSG00000000411	3.26933	-2.32788	-1.21901	1.80526	-0.675258	0.499512		1.0751	2.81566	1.86729	7.31928	4	129382807	129384815	-1	58864	protein_coding	Tssk3	testis-specific serine kinase 3 [Source:MGI Symbol;Acc:MGI:1929914]
ENSMUSG00000000420	4413.35	1.15986	0.21395	0.0929078	2.30282	0.0212888	0.139382	4871.29	4609.24	4121.1	4051.74	18	24338401	24419875	1	14423	protein_coding	Galnt1	polypeptide N-acetylgalactosaminyltransferase 1 [Source:MGI Symbol;Acc:MGI:894693]
ENSMUSG00000000439	518.439	1.0991	0.136328	0.160372	0.850072	0.395285	0.7707	562.279	523.713	491.097	496.665	6	115578863	115599585	1	67027	protein_coding	Mkrn2	makorin, ring finger protein, 2 [Source:MGI Symbol;Acc:MGI:1914277]
ENSMUSG00000000441	642.634	-1.21115	-0.276381	0.153696	-1.79823	0.0721402	0.316576	607.433	555.624	740.379	667.1	6	115595028	115653596	-1	110157	protein_coding	Raf1	v-raf-leukemia viral oncogene 1 [Source:MGI Symbol;Acc:MGI:97847]
ENSMUSG00000000486	6654.55	1.11538	0.15754	0.0873158	1.80425	0.0711915	0.314495	6926.89	7107.67	6192.86	6390.78	7	126813619	126832302	-1	54204	protein_coding	Septin1	septin 1 [Source:MGI Symbol;Acc:MGI:1858916]
ENSMUSG00000000486	6654.55	1.11538	0.15754	0.0873158	1.80425	0.0711915	0.314495	6926.89	7107.67	6192.86	6390.78	7	126813619	126832302	-1	100043580	protein_coding	Septin1	septin 1 [Source:MGI Symbol;Acc:MGI:1858916]
ENSMUSG00000000530	585.484	-1.11816	-0.161127	0.535376	-0.30096	0.763445	0.943843	627.86	477.724	406.135	830.216	15	101026403	101043217	1	11482	protein_coding	Acvrl1	activin A receptor, type II-like 1 [Source:MGI Symbol;Acc:MGI:1338946]
ENSMUSG00000000531	360.626	1.0269	0.0382997	0.183376	0.208859	0.834558	0.963154	367.685	363.221	361.32	350.28	15	101122069	101130637	1	56149	protein_coding	Tamalin	trafficking regulator and scaffold protein tamalin [Source:MGI Symbol;Acc:MGI:1860303]
ENSMUSG00000000532	471.705	1.05861	0.0821714	0.200113	0.410625	0.681348	0.916554	521.425	448.629	385.595	531.171	15	101071948	101111565	1	11479	protein_coding	Acvr1b	activin A receptor, type 1B [Source:MGI Symbol;Acc:MGI:1338944]
ENSMUSG00000000538	657.646	-1.20088	-0.264087	0.159465	-1.65608	0.0977059	0.381365	623.56	571.58	655.418	780.026	11	60117540	60243731	-1	216810	protein_coding	Tom1l2	target of myb1-like 2 (chicken) [Source:MGI Symbol;Acc:MGI:2443306]
ENSMUSG00000000552	2642.62	1.06391	0.0893734	0.100608	0.88833	0.374363	0.754683	2711.41	2737.76	2633.81	2487.51	15	103222322	103248520	-1	29813	protein_coding	Zfp385a	zinc finger protein 385A [Source:MGI Symbol;Acc:MGI:1352495]
ENSMUSG00000000555	56.5179	-1.64215	-0.715588	0.458229	-1.56164	0.118373	0.422256	36.5535	48.8048	56.0186	84.6945	15	103252713	103275190	-1	16402	protein_coding	Itga5	integrin alpha 5 (fibronectin receptor alpha) [Source:MGI Symbol;Acc:MGI:96604]
ENSMUSG00000000561	2338.2	1.00569	0.00818266	0.125554	0.0651723	0.948037	0.989374	2200.74	2489.05	2540.44	2122.59	3	105866685	105877353	1	70465	protein_coding	Wdr77	WD repeat domain 77 [Source:MGI Symbol;Acc:MGI:1917715]
ENSMUSG00000000562	26.9547	-1.71718	-0.78004	0.625482	-1.2471	0.21236	0.587003	16.1265	23.4639	32.6775	35.5508	3	105778174	105816242	1	11542	protein_coding	Adora3	adenosine A3 receptor [Source:MGI Symbol;Acc:MGI:104847]
ENSMUSG00000000562	26.9547	-1.71718	-0.78004	0.625482	-1.2471	0.21236	0.587003	16.1265	23.4639	32.6775	35.5508	3	105778174	105816242	1	69296	protein_coding	Adora3	adenosine A3 receptor [Source:MGI Symbol;Acc:MGI:104847]
ENSMUSG00000000563	10154.3	1.05924	0.0830317	0.0830857	0.999351	0.317625	0.708125	10438.2	10454.6	9772.45	9952.13	3	105850014	105867415	-1	11950	protein_coding	Atp5pb	ATP synthase peripheral stalk-membrane subunit b [Source:MGI Symbol;Acc:MGI:1100495]
ENSMUSG00000000568	10779.2	-1.14442	-0.194614	0.102604	-1.89675	0.0578608	0.27532	9928.58	10178.6	12460.4	10549.2	5	100103794	100126797	-1	11991	protein_coding	Hnrnpd	heterogeneous nuclear ribonucleoprotein D [Source:MGI Symbol;Acc:MGI:101947]
ENSMUSG00000000579	109.225	-1.04817	-0.0678784	0.369822	-0.183543	0.854372	0.967531	103.21	109.811	77.4924	146.386	17	6869070	6877173	1	100040563	protein_coding	Dynlt1c	dynein light chain Tctex-type 1C [Source:MGI Symbol;Acc:MGI:3807476]
ENSMUSG00000000581	1035.29	1.12742	0.173023	0.125575	1.37785	0.168251	0.517331	1101.98	1092.48	952.316	994.377	11	17207579	17219176	1	57316	protein_coding	C1d	C1D nuclear receptor co-repressor [Source:MGI Symbol;Acc:MGI:1927354]
ENSMUSG00000000594	7067.89	1.38513	0.470024	0.103114	4.55827	5.15767e-06	0.000140346	8442.78	7974.9	5486.09	6367.77	11	54988941	55003855	1	14667	protein_coding	Gm2a	GM2 ganglioside activator protein [Source:MGI Symbol;Acc:MGI:95762]
ENSMUSG00000000600	2874.07	-1.06039	-0.0845954	0.103465	-0.817622	0.413573	0.783975	2804.94	2775.31	3104.36	2811.65	5	3853184	3895564	1	79264	protein_coding	Krit1	KRIT1, ankyrin repeat containing [Source:MGI Symbol;Acc:MGI:1930618]
ENSMUSG00000000605	1407.12	1.04751	0.0669677	0.117361	0.570614	0.568261	0.87315	1412.69	1466.96	1421.94	1326.88	7	7285308	7303850	-1	12727	protein_coding	Clcn4	chloride channel, voltage-sensitive 4 [Source:MGI Symbol;Acc:MGI:104571]
ENSMUSG00000000628	5375.09	1.0938	0.129355	0.359921	0.359399	0.719296	0.930573	5925.97	5305.65	3890.49	6378.23	6	82702006	82751435	-1	15277	protein_coding	Hk2	hexokinase 2 [Source:MGI Symbol;Acc:MGI:1315197]
ENSMUSG00000000631	3367.32	1.13024	0.176633	0.0956258	1.84712	0.0647292	0.296945	3530.64	3615.31	3099.7	3223.62	11	77654072	77756806	1	360013	protein_coding	Myo18a	myosin XVIIIA [Source:MGI Symbol;Acc:MGI:2667185]
ENSMUSG00000000673	3713.11	1.28804	0.365173	0.149595	2.44108	0.0146435	0.106717	4574.56	3786.13	2732.77	3758.97	17	84138585	84155392	-1	107766	protein_coding	Haao	3-hydroxyanthranilate 3,4-dioxygenase [Source:MGI Symbol;Acc:MGI:1349444]
ENSMUSG00000000682	5313.33	1.1926	0.254108	0.111101	2.28719	0.0221849	0.143431	5973.27	5586.28	4412.4	5281.38	4	133809759	133822393	-1	23833	protein_coding	Cd52	CD52 antigen [Source:MGI Symbol;Acc:MGI:1346088]
ENSMUSG00000000686	316.257	1.08838	0.122176	0.202373	0.603718	0.546031	0.864352	303.179	355.712	290.363	315.775	11	77405947	77429433	1	67477	protein_coding	Abhd15	abhydrolase domain containing 15 [Source:MGI Symbol;Acc:MGI:1914727]
ENSMUSG00000000693	55.735	-1.23857	-0.308681	0.442029	-0.698327	0.484973	0.829334	45.1543	54.4362	70.0233	53.3262	6	83011154	83029543	1	16950	protein_coding	Loxl3	lysyl oxidase-like 3 [Source:MGI Symbol;Acc:MGI:1337004]
ENSMUSG00000000708	1314.19	1.00383	0.00552195	0.11718	0.0471235	0.962415	0.99133	1330.98	1302.71	1336.98	1286.1	17	53873889	53979748	1	18519	protein_coding	Kat2b	K(lysine) acetyltransferase 2B [Source:MGI Symbol;Acc:MGI:1343094]
ENSMUSG00000000711	2831.48	-1.01401	-0.02007	0.0979334	-0.204935	0.837623	0.963582	2773.77	2849.45	2816.8	2885.89	10	128513044	128532133	-1	19344	protein_coding	Rab5b	RAB5B, member RAS oncogene family [Source:MGI Symbol;Acc:MGI:105938]
ENSMUSG00000000730	11.4032	-6.44387	-2.68793	1.10558	-2.43124	0.0150472	0.108828	4.30041	1.87711	11.2037	28.2315	10	77877781	77899456	1	54427	protein_coding	Dnmt3l	DNA (cytosine-5-)-methyltransferase 3-like [Source:MGI Symbol;Acc:MGI:1859287]
ENSMUSG00000000731	2.81357	-2.53273	-1.34069	2.05643	-0.651952	0.514432		3.22531	0	2.80093	5.22806	10	77865856	77879444	-1	11634	protein_coding	Aire	autoimmune regulator (autoimmune polyendocrinopathy candidiasis ectodermal dystrophy) [Source:MGI Symbol;Acc:MGI:1338803]
ENSMUSG00000000732	1374.3	-1.03004	-0.0427034	0.123702	-0.345213	0.729934	0.93365	1419.14	1289.57	1457.42	1331.06	10	77905136	77919747	1	50723	protein_coding	Icosl	icos ligand [Source:MGI Symbol;Acc:MGI:1354701]
ENSMUSG00000000738	2343.44	-1.0448	-0.0632259	0.107642	-0.587372	0.556954	0.869416	2351.25	2232.82	2286.49	2503.19	8	123789681	123824499	1	234847	protein_coding	Spg7	SPG7, paraplegin matrix AAA peptidase subunit [Source:MGI Symbol;Acc:MGI:2385906]
ENSMUSG00000000740	23992.7	1.17825	0.23664	0.0852423	2.77609	0.0055017	0.051569	26920.6	24991.8	21706.3	22352	8	123829089	123831983	1	270106	protein_coding	Rpl13	ribosomal protein L13 [Source:MGI Symbol;Acc:MGI:105922]
ENSMUSG00000000743	2985.9	-1.05711	-0.0801261	0.110053	-0.728069	0.466571	0.818788	3007.06	2798.77	2868.15	3269.63	8	123931003	123939502	-1	234852	protein_coding	Chmp1a	charged multivesicular body protein 1A [Source:MGI Symbol;Acc:MGI:1920159]
ENSMUSG00000000751	6937.37	1.08006	0.111106	0.0872347	1.27365	0.202787	0.575265	7063.43	7345.13	6739.97	6600.95	11	75188992	75239150	-1	68275	protein_coding	Rpa1	replication protein A1 [Source:MGI Symbol;Acc:MGI:1915525]
ENSMUSG00000000753	2435.44	-1.12201	-0.166088	0.133587	-1.24329	0.213759	0.589052	2271.69	2318.23	2239.81	2912.03	11	75300595	75313527	-1	20317	protein_coding	Serpinf1	serine (or cysteine) peptidase inhibitor, clade F, member 1 [Source:MGI Symbol;Acc:MGI:108080]
ENSMUSG00000000759	2060.57	1.08637	0.119517	0.104232	1.14664	0.251531	0.637309	2179.23	2112.69	1969.99	1980.39	8	12664277	12722248	-1	259279	protein_coding	Tubgcp3	tubulin, gamma complex associated protein 3 [Source:MGI Symbol;Acc:MGI:2183752]
ENSMUSG00000000776	1719.59	-1.09126	-0.125997	0.114276	-1.10256	0.270217	0.660055	1583.63	1705.35	1858.88	1730.49	14	70676197	70680887	-1	67065	protein_coding	Polr3d	polymerase (RNA) III (DNA directed) polypeptide D [Source:MGI Symbol;Acc:MGI:1914315]
ENSMUSG00000000782	942.043	1.11921	0.162481	0.131048	1.23986	0.215026	0.589572	1006.3	983.605	857.085	921.184	11	52143198	52174158	-1	21414	protein_coding	Tcf7	transcription factor 7, T cell specific [Source:MGI Symbol;Acc:MGI:98507]
ENSMUSG00000000787	24718.7	-1.03501	-0.04964	0.105849	-0.468972	0.63909	0.905023	22698.7	25888.2	26991.6	23296.2	X	13147209	13160291	1	13205	protein_coding	Ddx3x	DEAD box helicase 3, X-linked [Source:MGI Symbol;Acc:MGI:103064]
ENSMUSG00000000792	23.4737	-1.31654	-0.396749	0.693608	-0.572008	0.567317	0.87315	16.1265	24.4024	34.5448	18.821	8	71335533	71345401	-1	114479	protein_coding	Slc5a5	solute carrier family 5 (sodium iodide symporter), member 5 [Source:MGI Symbol;Acc:MGI:2149330]
ENSMUSG00000000804	2377.32	-1.04406	-0.0622066	0.102683	-0.605814	0.544638	0.862992	2381.35	2271.3	2469.49	2387.13	11	84875268	85030987	-1	237898	protein_coding	Usp32	ubiquitin specific peptidase 32 [Source:MGI Symbol;Acc:MGI:2144475]
ENSMUSG00000000811	2946.4	1.42659	0.512567	0.133428	3.84152	0.000122276	0.00229678	3439.25	3490.48	2763.58	2092.27	6	89620970	89652511	1	232223	protein_coding	Txnrd3	thioredoxin reductase 3 [Source:MGI Symbol;Acc:MGI:2386711]
ENSMUSG00000000823	2106.01	1.07499	0.104328	0.117652	0.886747	0.375215	0.7549	2215.79	2149.29	2189.39	1869.55	2	181223896	181234596	-1	269401	protein_coding	Zfp512b	zinc finger protein 512B [Source:MGI Symbol;Acc:MGI:2685478]
ENSMUSG00000000826	6668.53	-1.04793	-0.067537	0.101419	-0.665923	0.50546	0.841472	6478.57	6545.48	6324.5	7325.55	2	181162278	181196926	1	13002	protein_coding	Dnajc5	DnaJ heat shock protein family (Hsp40) member C5 [Source:MGI Symbol;Acc:MGI:892995]
ENSMUSG00000000827	2773.4	-1.01877	-0.0268295	0.0998258	-0.268763	0.788112	0.952241	2800.64	2694.59	2736.51	2861.84	2	181138935	181159759	1	66314	protein_coding	Tpd52l2	tumor protein D52-like 2 [Source:MGI Symbol;Acc:MGI:1913564]
ENSMUSG00000000838	2258.72	1.07452	0.103687	0.1353	0.766349	0.443468	0.804108	2243.74	2436.49	2452.68	1901.97	X	67722147	67761569	1	14265	protein_coding	Fmr1	FMRP translational regulator 1 [Source:MGI Symbol;Acc:MGI:95564]
ENSMUSG00000000861	1267.28	1.35133	0.43438	0.122223	3.554	0.000379418	0.00583309	1451.39	1462.27	1129.71	1025.74	11	24028056	24124123	1	14025	protein_coding	Bcl11a	B cell CLL/lymphoma 11A (zinc finger protein) [Source:MGI Symbol;Acc:MGI:106190]
ENSMUSG00000000869	34.6421	1.079	0.10969	0.545566	0.201058	0.840653	0.964599	34.4033	37.5422	37.3457	29.2771	11	53493809	53509496	-1	16189	protein_coding	Il4	interleukin 4 [Source:MGI Symbol;Acc:MGI:96556]
ENSMUSG00000000876	749.18	1.15888	0.212726	0.140353	1.51566	0.129606	0.446678	795.576	812.788	673.157	715.198	2	154427678	154445628	-1	59038	protein_coding	Pxmp4	peroxisomal membrane protein 4 [Source:MGI Symbol;Acc:MGI:1891701]
ENSMUSG00000000881	216.494	1.30537	0.384454	0.245991	1.56287	0.118082	0.421684	252.649	237.454	161.52	214.35	X	99811328	99862016	1	53310	protein_coding	Dlg3	discs large MAGUK scaffold protein 3 [Source:MGI Symbol;Acc:MGI:1888986]
ENSMUSG00000000884	241.296	1.06984	0.0973889	0.220708	0.441257	0.659027	0.90961	263.4	235.577	227.809	238.399	16	18317463	18385429	1	13972	protein_coding	Gnb1l	guanine nucleotide binding protein (G protein), beta polypeptide 1-like [Source:MGI Symbol;Acc:MGI:1338057]
ENSMUSG00000000901	403.981	1.58343	0.663057	0.192577	3.44308	0.000575134	0.00826495	500.998	489.925	351.05	273.95	10	75759056	75772330	-1	17385	protein_coding	Mmp11	matrix metallopeptidase 11 [Source:MGI Symbol;Acc:MGI:97008]
ENSMUSG00000000902	5421.56	1.07102	0.0989803	0.0894456	1.1066	0.268468	0.657638	5652.89	5561.87	5129.44	5342.03	10	75732603	75757451	-1	20587	protein_coding	Smarcb1	SWI/SNF related, matrix associated, actin dependent regulator of chromatin, subfamily b, member 1 [Source:MGI Symbol;Acc:MGI:1328366]
ENSMUSG00000000903	4798.31	1.40693	0.492552	0.098409	5.00515	5.58194e-07	1.80348e-05	5445.4	5773.99	4176.19	3797.66	10	75778891	75785491	1	22364	protein_coding	Vpreb3	pre-B lymphocyte gene 3 [Source:MGI Symbol;Acc:MGI:98938]
ENSMUSG00000000915	2585.85	1.04572	0.0645009	0.115819	0.556914	0.577586	0.876484	2738.29	2550.05	2724.37	2330.67	5	124111691	124143621	1	29816	protein_coding	Hip1r	huntingtin interacting protein 1 related [Source:MGI Symbol;Acc:MGI:1352504]
ENSMUSG00000000916	1653.78	-1.11711	-0.159769	0.11251	-1.42004	0.155597	0.496004	1526.65	1597.42	1693.63	1797.41	5	135398807	135405659	1	100609	protein_coding	Nsun5	NOL1/NOP2/Sun domain family, member 5 [Source:MGI Symbol;Acc:MGI:2140844]
ENSMUSG00000000934	717.263	1.10983	0.150338	0.153137	0.981721	0.326237	0.716832	741.821	767.738	739.446	620.048	15	75528884	75550649	-1	72960	protein_coding	Top1mt	DNA topoisomerase 1, mitochondrial [Source:MGI Symbol;Acc:MGI:1920210]
ENSMUSG00000000957	129.635	-1.94781	-0.961849	0.881642	-1.09098	0.275284	0.664665	83.858	91.9783	71.8906	270.813	14	54669069	54682821	1	17387	protein_coding	Mmp14	matrix metallopeptidase 14 (membrane-inserted) [Source:MGI Symbol;Acc:MGI:101900]
ENSMUSG00000000958	2203.06	-1.1442	-0.194343	0.138272	-1.40552	0.159867	0.503811	1895.41	2213.11	2079.22	2624.48	14	54606899	54655237	-1	20540	protein_coding	Slc7a7	solute carrier family 7 (cationic amino acid transporter, y+ system), member 7 [Source:MGI Symbol;Acc:MGI:1337120]
ENSMUSG00000000959	3667.16	1.05397	0.0758372	0.0971123	0.780922	0.434848	0.798135	3832.74	3694.15	3450.75	3691.01	14	54598291	54607130	1	69089	protein_coding	Oxa1l	oxidase assembly 1-like [Source:MGI Symbol;Acc:MGI:1916339]
ENSMUSG00000000976	3290.78	-1.00035	-0.000508076	0.0946231	-0.00536947	0.995716	0.998602	3298.42	3282.13	3318.17	3264.4	11	83644522	83674580	1	217026	protein_coding	Heatr6	HEAT repeat containing 6 [Source:MGI Symbol;Acc:MGI:1919790]
ENSMUSG00000000982	1302.66	-5.40449	-2.43416	0.144773	-16.8136	1.93988e-63	5.5531e-61	358.009	454.26	2096.96	2301.39	11	83538670	83540181	-1	20302	protein_coding	Ccl3	chemokine (C-C motif) ligand 3 [Source:MGI Symbol;Acc:MGI:98260]
ENSMUSG00000001016	3512.51	-1.41553	-0.501341	0.0939274	-5.33754	9.42181e-08	3.39684e-06	2938.26	2878.55	4140.71	4092.52	3	90383433	90395686	1	67781	protein_coding	Ilf2	interleukin enhancer binding factor 2 [Source:MGI Symbol;Acc:MGI:1915031]
ENSMUSG00000001017	5702.62	-1.02074	-0.0296137	0.0875647	-0.338192	0.735218	0.935062	5601.29	5686.7	5738.17	5784.32	3	90406263	90416805	-1	66511	protein_coding	Chtop	chromatin target of PRMT1 [Source:MGI Symbol;Acc:MGI:1913761]
ENSMUSG00000001018	985.033	1.2193	0.286055	0.136382	2.09745	0.0359538	0.202601	1109.51	1054.94	826.275	949.415	3	90395333	90398340	-1	20615	protein_coding	Snapin	SNAP-associated protein [Source:MGI Symbol;Acc:MGI:1333745]
ENSMUSG00000001020	30.3032	-1.77242	-0.825722	0.729786	-1.13146	0.257862	0.645128	27.9527	15.9554	61.6205	15.6842	3	90511078	90513352	1	20198	protein_coding	S100a4	S100 calcium binding protein A4 [Source:MGI Symbol;Acc:MGI:1330282]
ENSMUSG00000001023	9.96718	-1.03462	-0.0491028	1.04406	-0.0470308	0.962489	0.99133	6.45062	13.1398	14.0047	6.27367	3	90515830	90519087	1	20199	protein_coding	S100a5	S100 calcium binding protein A5 [Source:MGI Symbol;Acc:MGI:1338915]
ENSMUSG00000001025	2131.24	-1.24725	-0.318754	0.162419	-1.96254	0.0496993	0.248549	2036.25	1756.97	1932.64	2799.1	3	90520189	90531488	1	20200	protein_coding	S100a6	S100 calcium binding protein A6 (calcyclin) [Source:MGI Symbol;Acc:MGI:1339467]
ENSMUSG00000001027	330.173	1.63566	0.709874	0.197815	3.58857	0.000332491	0.00521746	410.689	409.21	270.757	230.035	11	106209418	106244114	-1	110880	protein_coding	Scn4a	sodium channel, voltage-gated, type IV, alpha [Source:MGI Symbol;Acc:MGI:98250]
ENSMUSG00000001029	562.832	1.11084	0.151649	0.166062	0.913205	0.361135	0.744239	612.809	572.518	579.793	486.209	11	106268482	106278901	-1	15896	protein_coding	Icam2	intercellular adhesion molecule 2 [Source:MGI Symbol;Acc:MGI:96394]
ENSMUSG00000001034	1786.89	1.0193	0.0275844	0.112542	0.245102	0.806377	0.957067	1871.75	1736.33	1716.97	1822.5	11	61379638	61385232	-1	23939	protein_coding	Mapk7	mitogen-activated protein kinase 7 [Source:MGI Symbol;Acc:MGI:1346347]
ENSMUSG00000001036	2.52541	-1.43891	-0.524974	1.94819	-0.269467	0.78757		3.22531	0.938555	2.80093	3.13683	11	61408075	61470513	-1	13855	protein_coding	Epn2	epsin 2 [Source:MGI Symbol;Acc:MGI:1333766]
ENSMUSG00000001039	76.6435	1.25428	0.326862	0.383998	0.851208	0.394654	0.770241	88.1585	82.5928	79.3597	56.463	11	61395970	61403757	1	27078	protein_coding	B9d1	B9 protein domain 1 [Source:MGI Symbol;Acc:MGI:1351471]
ENSMUSG00000001052	4221.22	1.01192	0.0171013	0.098998	0.172744	0.862853	0.970074	4074.64	4416.84	4052.01	4341.38	3	129776408	129855202	-1	99683	protein_coding	Sec24b	Sec24 related gene family, member B (S. cerevisiae) [Source:MGI Symbol;Acc:MGI:2139764]
ENSMUSG00000001053	1554.05	1.13954	0.188451	0.124412	1.51473	0.12984	0.447162	1724.47	1586.16	1352.85	1552.73	11	51533890	51541669	-1	212706	protein_coding	N4bp3	NEDD4 binding protein 3 [Source:MGI Symbol;Acc:MGI:2442218]
ENSMUSG00000001054	2674.99	1.09019	0.124574	0.105861	1.17677	0.239289	0.620781	2782.37	2797.83	2420	2699.77	11	51514498	51526723	-1	66089	protein_coding	Rmnd5b	required for meiotic nuclear division 5 homolog B [Source:MGI Symbol;Acc:MGI:1913339]
ENSMUSG00000001056	6532.36	-1.06764	-0.0944296	0.0864672	-1.09208	0.274796	0.664608	6306.55	6330.55	6671.82	6820.52	11	51510562	51514541	1	52530	protein_coding	Nhp2	NHP2 ribonucleoprotein [Source:MGI Symbol;Acc:MGI:1098547]
ENSMUSG00000001062	711.913	1.00437	0.00629432	0.141722	0.0444132	0.964575	0.99133	727.845	699.223	709.569	711.016	8	123969095	123981087	-1	72325	protein_coding	Vps9d1	VPS9 domain containing 1 [Source:MGI Symbol;Acc:MGI:1914143]
ENSMUSG00000001065	794.411	-1.04002	-0.0566061	0.137803	-0.410774	0.681238	0.916554	763.323	794.017	787.995	832.307	8	123980934	123996484	1	57247	protein_coding	Zfp276	zinc finger protein (C2H2 type) 276 [Source:MGI Symbol;Acc:MGI:1888495]
ENSMUSG00000001082	1482.84	-1.50668	-0.59137	0.128198	-4.61295	3.96994e-06	0.000109907	1203.04	1162.87	1631.08	1934.38	5	34790986	34794556	-1	68294	protein_coding	Mfsd10	major facilitator superfamily domain containing 10 [Source:MGI Symbol;Acc:MGI:1915544]
ENSMUSG00000001089	704.21	1.19142	0.25268	0.143477	1.76111	0.0782191	0.333905	756.873	774.308	622.74	662.918	4	136197072	136282091	1	269593	protein_coding	Luzp1	leucine zipper protein 1 [Source:MGI Symbol;Acc:MGI:107629]
ENSMUSG00000001098	1836.84	-1.30962	-0.389143	0.107702	-3.61316	0.000302487	0.00481055	1575.03	1605.87	2042.81	2123.64	5	114501628	114518569	-1	330171	protein_coding	Kctd10	potassium channel tetramerisation domain containing 10 [Source:MGI Symbol;Acc:MGI:2141207]
ENSMUSG00000001100	3190.14	1.06445	0.0901106	0.0952204	0.946337	0.343977	0.732207	3320.99	3258.66	3101.56	3079.33	11	78403019	78413562	1	67811	protein_coding	Poldip2	polymerase (DNA-directed), delta interacting protein 2 [Source:MGI Symbol;Acc:MGI:1915061]
ENSMUSG00000001105	1435.14	-1.01461	-0.0209213	0.117772	-0.177643	0.859004	0.968927	1489.02	1360.9	1442.48	1448.17	11	78427187	78432563	1	55978	protein_coding	Ift20	intraflagellar transport 20 [Source:MGI Symbol;Acc:MGI:1915585]
ENSMUSG00000001123	5126.7	1.09369	0.129201	0.101021	1.27895	0.200913	0.572501	5309.93	5401.38	4575.79	5219.69	11	78853800	78875772	-1	16859	protein_coding	Lgals9	lectin, galactose binding, soluble 9 [Source:MGI Symbol;Acc:MGI:109496]
ENSMUSG00000001127	4318.51	1.00296	0.00426797	0.0907919	0.0470083	0.962507	0.99133	4353.09	4296.7	4280.76	4343.47	X	20664053	20726758	1	11836	protein_coding	Araf	Araf proto-oncogene, serine/threonine kinase [Source:MGI Symbol;Acc:MGI:88065]
ENSMUSG00000001128	3884.96	-1.80796	-0.854362	0.122021	-7.00175	2.52789e-12	1.61525e-10	2739.36	2794.08	4430.14	5576.25	X	20791693	20797794	-1	18636	protein_coding	Cfp	complement factor properdin [Source:MGI Symbol;Acc:MGI:97545]
ENSMUSG00000001131	37.6267	-1.09857	-0.135628	0.522175	-0.259737	0.795066	0.955081	32.2531	39.4193	40.1467	38.6876	X	20736405	20740974	1	21857	protein_coding	Timp1	tissue inhibitor of metalloproteinase 1 [Source:MGI Symbol;Acc:MGI:98752]
ENSMUSG00000001134	332.433	-1.10857	-0.148704	0.193944	-0.766736	0.443238	0.804007	310.705	320.047	370.656	328.322	X	20807961	20828256	-1	22294	protein_coding	Uxt	ubiquitously expressed prefoldin like chaperone [Source:MGI Symbol;Acc:MGI:1277988]
ENSMUSG00000001138	697.572	1.21963	0.286446	0.143189	2.00047	0.0454495	0.235099	766.549	766.799	644.214	612.728	1	36550948	36567318	1	94218	protein_coding	Cnnm3	cyclin M3 [Source:MGI Symbol;Acc:MGI:2151055]
ENSMUSG00000001143	1180.88	-1.19099	-0.252165	0.129423	-1.94838	0.05137	0.254503	1036.4	1118.76	1209.07	1359.29	1	36458952	36484352	-1	214895	protein_coding	Lman2l	lectin, mannose-binding 2-like [Source:MGI Symbol;Acc:MGI:2443010]
ENSMUSG00000001150	3616.89	-1.01095	-0.0157094	0.101001	-0.155536	0.876399	0.973753	3637.07	3558.06	3826.07	3446.34	10	76304761	76351691	1	54387	protein_coding	Mcm3ap	minichromosome maintenance complex component 3 associated protein [Source:MGI Symbol;Acc:MGI:1930089]
ENSMUSG00000001151	2375.07	-1.76599	-0.820474	0.116263	-7.05706	1.70057e-12	1.10638e-10	1769.62	1665.93	3259.35	2805.38	10	76187097	76278620	-1	18541	protein_coding	Pcnt	pericentrin (kendrin) [Source:MGI Symbol;Acc:MGI:102722]
ENSMUSG00000001156	2712.83	-1.34804	-0.430864	0.134004	-3.2153	0.00130306	0.0163374	2050.22	2569.76	2872.82	3358.5	6	86624024	86646143	-1	17119	protein_coding	Mxd1	MAX dimerization protein 1 [Source:MGI Symbol;Acc:MGI:96908]
ENSMUSG00000001157	1055.09	1.09214	0.127162	0.126716	1.00352	0.315609	0.706604	1142.83	1060.57	1002.73	1014.24	6	86668750	86710365	-1	23885	protein_coding	Gmcl1	germ cell-less, spermatogenesis associated 1 [Source:MGI Symbol;Acc:MGI:1345156]
ENSMUSG00000001158	2042.67	-1.00504	-0.00725179	0.111272	-0.0651717	0.948037	0.989374	2112.58	1962.52	1962.52	2133.05	6	86652133	86661504	-1	66618	protein_coding	Snrnp27	small nuclear ribonucleoprotein 27 (U4/U6.U5) [Source:MGI Symbol;Acc:MGI:1913868]
ENSMUSG00000001166	268.31	1.04255	0.0601156	0.213441	0.281649	0.778213	0.949105	294.578	253.41	258.619	266.631	5	120938259	120950579	-1	114643	protein_coding	Oas1c	2'-5' oligoadenylate synthetase 1C [Source:MGI Symbol;Acc:MGI:2149633]
ENSMUSG00000001173	772.843	-1.02916	-0.0414619	0.152713	-0.271503	0.786004	0.951392	823.529	700.162	738.512	829.17	X	47001264	47054745	1	320634	protein_coding	Ocrl	OCRL, inositol polyphosphate-5-phosphatase [Source:MGI Symbol;Acc:MGI:109589]
ENSMUSG00000001175	20276.2	-1.08558	-0.118463	0.0833991	-1.42043	0.155481	0.495856	18957.3	19930.2	20728.8	21488.4	12	100165694	100176073	1	12313	protein_coding	Calm1	calmodulin 1 [Source:MGI Symbol;Acc:MGI:88251]
ENSMUSG00000001211	1486.71	1.0709	0.0988234	0.115251	0.857465	0.391188	0.767885	1586.85	1488.55	1410.74	1460.72	10	78105012	78188323	-1	28169	protein_coding	Agpat3	1-acylglycerol-3-phosphate O-acyltransferase 3 [Source:MGI Symbol;Acc:MGI:1336186]
ENSMUSG00000001227	515.972	-1.20139	-0.264702	0.456257	-0.580159	0.561807	0.871352	523.575	413.903	398.666	727.746	17	56430085	56447343	-1	20359	protein_coding	Sema6b	sema domain, transmembrane domain (TM), and cytoplasmic domain, (semaphorin) 6B [Source:MGI Symbol;Acc:MGI:1202889]
ENSMUSG00000001228	5344.37	1.00486	0.00699699	0.102992	0.067937	0.945836	0.988517	5319.61	5395.75	5719.5	4942.61	17	56610321	56630486	1	18140	protein_coding	Uhrf1	ubiquitin-like, containing PHD and RING finger domains, 1 [Source:MGI Symbol;Acc:MGI:1338889]
ENSMUSG00000001229	6278.33	-1.04084	-0.0577491	0.0985396	-0.586049	0.557842	0.869827	6066.81	6237.63	6006.13	6802.75	17	56493807	56525905	-1	224897	protein_coding	Dpp9	dipeptidylpeptidase 9 [Source:MGI Symbol;Acc:MGI:2443967]
ENSMUSG00000001240	2.66501	1.18682	0.247107	1.91491	0.129044	0.897323		1.0751	4.69277	2.80093	2.09122	11	101136854	101150372	1	54409	protein_coding	Ramp2	receptor (calcitonin) activity modifying protein 2 [Source:MGI Symbol;Acc:MGI:1859650]
ENSMUSG00000001247	35.507	-1.35977	-0.443359	0.586189	-0.756342	0.449444	0.806519	21.5021	38.4807	30.8102	51.235	7	30657195	30672889	-1	54135	protein_coding	Lsr	lipolysis stimulated lipoprotein receptor [Source:MGI Symbol;Acc:MGI:1927471]
ENSMUSG00000001248	5872.13	1.13916	0.18797	0.0906578	2.07341	0.0381346	0.210986	6354.93	6153.16	5332.04	5648.39	7	30829552	30855321	-1	52857	protein_coding	Gramd1a	GRAM domain containing 1A [Source:MGI Symbol;Acc:MGI:105490]
ENSMUSG00000001249	6.25542	-2.14546	-1.10129	1.28826	-0.854866	0.392625		3.22531	4.69277	5.60186	11.5017	7	30798150	30814715	-1	15451	protein_coding	Hpn	hepsin [Source:MGI Symbol;Acc:MGI:1196620]
ENSMUSG00000001270	6636.6	1.42432	0.510273	0.102675	4.96977	6.70338e-07	2.13212e-05	8143.91	7452.12	5129.44	5820.92	12	111635795	111638772	-1	12709	protein_coding	Ckb	creatine kinase, brain [Source:MGI Symbol;Acc:MGI:88407]
ENSMUSG00000001280	4966.97	1.07391	0.102868	0.0946012	1.08738	0.276868	0.665947	4968.05	5319.73	4915.63	4664.47	15	102314578	102344839	1	20683	protein_coding	Sp1	trans-acting transcription factor 1 [Source:MGI Symbol;Acc:MGI:98372]
ENSMUSG00000001281	2371.36	-1.14519	-0.195589	0.111192	-1.75902	0.0785741	0.334214	2331.9	2090.16	2436.81	2626.58	15	102124430	102140379	-1	16421	protein_coding	Itgb7	integrin beta 7 [Source:MGI Symbol;Acc:MGI:96616]
ENSMUSG00000001285	1712.09	1.14223	0.19185	0.109123	1.75811	0.0787295	0.334676	1799.72	1851.77	1618	1578.87	15	102240144	102246574	1	60315	protein_coding	Myg1	melanocyte proliferating gene 1 [Source:MGI Symbol;Acc:MGI:1929864]
ENSMUSG00000001288	584.709	-1.14502	-0.195379	0.169795	-1.15068	0.249865	0.635452	598.832	491.803	586.328	661.872	15	102143373	102165952	-1	19411	protein_coding	Rarg	retinoic acid receptor, gamma [Source:MGI Symbol;Acc:MGI:97858]
ENSMUSG00000001289	3303.9	1.06964	0.0971288	0.103104	0.942049	0.346168	0.734247	3557.52	3272.74	3070.75	3314.59	15	102234551	102240308	1	56612	protein_coding	Pfdn5	prefoldin 5 [Source:MGI Symbol;Acc:MGI:1928753]
ENSMUSG00000001300	21.4526	1.02185	0.0311824	0.749294	0.0416157	0.966805	0.99133	24.7274	18.7711	30.8102	11.5017	8	8667434	8711242	-1	13642	protein_coding	Efnb2	ephrin B2 [Source:MGI Symbol;Acc:MGI:105097]
ENSMUSG00000001305	3312.84	1.00879	0.0126236	0.115786	0.109025	0.913182	0.982095	3136.08	3518.64	3549.71	3046.91	1	186453175	186481555	-1	67223	protein_coding	Rrp15	ribosomal RNA processing 15 homolog [Source:MGI Symbol;Acc:MGI:1914473]
ENSMUSG00000001313	75.5281	-1.17547	-0.23324	0.387705	-0.601593	0.547445	0.864482	73.107	65.6988	68.156	95.1506	11	101355825	101362679	1	11858	protein_coding	Rnd2	Rho family GTPase 2 [Source:MGI Symbol;Acc:MGI:1338755]
ENSMUSG00000001323	246.647	-1.00984	-0.0141243	0.22458	-0.062892	0.949853	0.989658	268.776	222.437	254.885	240.491	11	74797185	74816774	-1	27364	protein_coding	Srr	serine racemase [Source:MGI Symbol;Acc:MGI:1351636]
ENSMUSG00000001333	7.43845	-1.70241	-0.767576	1.14863	-0.668254	0.503971		5.37552	5.63133	9.33644	9.4105	4	129181410	129202352	1	68828	protein_coding	Sync	syncoilin [Source:MGI Symbol;Acc:MGI:1916078]
ENSMUSG00000001348	397.475	1.47772	0.563377	0.182639	3.08465	0.00203795	0.0233727	506.374	442.059	318.372	323.094	9	22038023	22047007	-1	11433	protein_coding	Acp5	acid phosphatase 5, tartrate resistant [Source:MGI Symbol;Acc:MGI:87883]
ENSMUSG00000001366	998.337	1.10239	0.140636	0.12753	1.10277	0.270129	0.660055	1018.12	1075.58	952.316	947.324	9	77988781	78016347	-1	71538	protein_coding	Fbxo9	f-box protein 9 [Source:MGI Symbol;Acc:MGI:1918788]
ENSMUSG00000001376	2914.79	1.0668	0.0932929	0.105294	0.886022	0.375606	0.7549	2912.45	3105.68	2955.92	2685.13	6	3498382	3603531	1	73288	protein_coding	Vps50	VPS50 EARP/GARPII complex subunit [Source:MGI Symbol;Acc:MGI:1920538]
ENSMUSG00000001380	5538.11	-1.0769	-0.106888	0.0894493	-1.19495	0.232106	0.612488	5208.87	5456.76	5730.7	5756.09	18	36899581	36916258	-1	15115	protein_coding	Hars	histidyl-tRNA synthetase [Source:MGI Symbol;Acc:MGI:108087]
ENSMUSG00000001383	3448.96	1.05368	0.075437	0.0982365	0.767912	0.442539	0.803462	3471.51	3606.87	3475.02	3242.44	18	36926929	36932719	1	66492	protein_coding	Zmat2	zinc finger, matrin type 2 [Source:MGI Symbol;Acc:MGI:1913742]
ENSMUSG00000001403	1869.67	-8.90743	-3.15501	0.131604	-23.9735	5.2556e-127	1.07462e-123	388.112	366.975	3083.82	3639.77	2	164611818	164620742	1	68612	protein_coding	Ube2c	ubiquitin-conjugating enzyme E2C [Source:MGI Symbol;Acc:MGI:1915862]
ENSMUSG00000001415	8876.59	-1.05963	-0.0835647	0.086473	-0.966367	0.33386	0.724533	8387.95	8850.57	9059.14	9208.7	3	88243567	88269645	1	229512	protein_coding	Smg5	Smg-5 homolog, nonsense mediated mRNA decay factor (C. elegans) [Source:MGI Symbol;Acc:MGI:2447364]
ENSMUSG00000001416	24466.1	1.02418	0.0344715	0.0843018	0.408906	0.682609	0.91685	24108.1	25408.5	24790.1	23557.6	3	88204423	88229074	1	12462	protein_coding	Cct3	chaperonin containing Tcp1, subunit 3 (gamma) [Source:MGI Symbol;Acc:MGI:104708]
ENSMUSG00000001418	2353	1.04883	0.0687747	0.127244	0.540496	0.588855	0.883411	2444.78	2372.67	2039.08	2555.47	3	88232330	88238620	1	56700	protein_coding	Glmp	glycosylated lysosomal membrane protein [Source:MGI Symbol;Acc:MGI:1913318]
ENSMUSG00000001419	7594.64	-1.00471	-0.00677283	0.0949804	-0.0713077	0.943153	0.98795	7183.84	7969.27	7792.19	7433.25	3	88049679	88079393	1	17261	protein_coding	Mef2d	myocyte enhancer factor 2D [Source:MGI Symbol;Acc:MGI:99533]
ENSMUSG00000001420	47.3211	-1.07016	-0.0978299	0.477313	-0.20496	0.837604	0.963582	48.3796	43.1735	56.9523	40.7788	3	88235962	88243455	-1	71913	protein_coding	Tmem79	transmembrane protein 79 [Source:MGI Symbol;Acc:MGI:1919163]
ENSMUSG00000001424	13479.2	-1.01829	-0.026143	0.0858643	-0.304469	0.760771	0.942926	13260.3	13453.2	13132.6	14070.8	6	28475138	28935161	1	56463	protein_coding	Snd1	staphylococcal nuclease and tudor domain containing 1 [Source:MGI Symbol;Acc:MGI:1929266]
ENSMUSG00000001435	60.3959	1.01794	0.02565	0.416231	0.0616245	0.950862	0.98983	65.5813	56.3133	56.9523	62.7367	10	76888012	77002382	-1	12822	protein_coding	Col18a1	collagen, type XVIII, alpha 1 [Source:MGI Symbol;Acc:MGI:88451]
ENSMUSG00000001436	2607.57	1.0614	0.0859749	0.10791	0.796726	0.42561	0.791651	2739.36	2630.77	2385.46	2674.67	10	76868075	76896836	1	20509	protein_coding	Slc19a1	solute carrier family 19 (folate transporter), member 1 [Source:MGI Symbol;Acc:MGI:103182]
ENSMUSG00000001440	27870.8	-1.03471	-0.0492284	0.0950821	-0.517746	0.604635	0.889429	26305.6	28485.1	30015.7	26676.7	11	97050540	97078707	-1	16211	protein_coding	Kpnb1	karyopherin (importin) beta 1 [Source:MGI Symbol;Acc:MGI:107532]
ENSMUSG00000001441	4900.68	-1.10445	-0.143327	0.110963	-1.29167	0.196473	0.565023	4639.07	4674.94	4665.42	5623.3	11	97096668	97171464	-1	19155	protein_coding	Npepps	aminopeptidase puromycin sensitive [Source:MGI Symbol;Acc:MGI:1101358]
ENSMUSG00000001444	3.77767	-1.96696	-0.975971	1.61488	-0.604361	0.545604		3.22531	1.87711	3.73457	6.27367	11	96988897	97006157	-1	57765	protein_coding	Tbx21	T-box 21 [Source:MGI Symbol;Acc:MGI:1888984]
ENSMUSG00000001445	2500.51	1.06419	0.0897525	0.11086	0.809605	0.418167	0.786806	2498.54	2657.05	2275.29	2571.16	11	96932386	96940039	1	107732	protein_coding	Mrpl10	mitochondrial ribosomal protein L10 [Source:MGI Symbol;Acc:MGI:1333801]
ENSMUSG00000001467	3167.04	1.25252	0.324837	0.126559	2.56669	0.0102675	0.081878	3769.31	3274.62	2529.24	3095.01	5	4131145	4154746	-1	13121	protein_coding	Cyp51	cytochrome P450, family 51 [Source:MGI Symbol;Acc:MGI:106040]
ENSMUSG00000001472	15215.3	1.09207	0.127066	0.0977555	1.29984	0.193657	0.560493	16414.7	15354.8	13578	15513.7	8	124100492	124130574	1	66855	protein_coding	Tcf25	transcription factor 25 (basic helix-loop-helix) [Source:MGI Symbol;Acc:MGI:1914105]
ENSMUSG00000001473	5220.23	-1.11351	-0.15511	0.34701	-0.446988	0.654884	0.909129	5116.42	4763.16	4198.6	6802.75	18	67523787	67535819	1	67951	protein_coding	Tubb6	tubulin, beta 6 class V [Source:MGI Symbol;Acc:MGI:1915201]
ENSMUSG00000001482	650.099	1.13446	0.182002	0.15327	1.18746	0.235047	0.615371	738.596	643.848	603.134	614.82	8	124150266	124190009	1	23854	protein_coding	Def8	differentially expressed in FDCP 8 [Source:MGI Symbol;Acc:MGI:1346331]
ENSMUSG00000001494	3.06971	-10.9502	-3.45289	2.52782	-1.36596	0.171953		1.0751	0	11.2037	0	11	101853284	101857841	-1	74499	protein_coding	Sost	sclerostin [Source:MGI Symbol;Acc:MGI:1921749]
ENSMUSG00000001507	29.8071	1.86004	0.895334	0.600942	1.48988	0.136255	0.45839	33.3282	44.1121	17.7392	24.0491	11	94935300	94967627	-1	16400	protein_coding	Itga3	integrin alpha 3 [Source:MGI Symbol;Acc:MGI:96602]
ENSMUSG00000001517	1580.91	-4.58313	-2.19633	0.116849	-18.7964	8.07918e-79	3.30392e-76	559.054	573.457	2653.41	2537.7	6	128339930	128353109	1	14235	protein_coding	Foxm1	forkhead box M1 [Source:MGI Symbol;Acc:MGI:1347487]
ENSMUSG00000001518	1158.98	-1.05696	-0.0799178	0.12309	-0.649265	0.516167	0.848649	1085.85	1167.56	1189.46	1193.04	6	128386407	128401894	-1	101142	protein_coding	Itfg2	integrin alpha FG-GAP repeat containing 2 [Source:MGI Symbol;Acc:MGI:1915450]
ENSMUSG00000001520	100.595	-1.07629	-0.106064	0.356217	-0.297752	0.765893	0.944857	93.534	100.425	127.909	80.5121	6	128376259	128393390	1	60345	protein_coding	Nrip2	nuclear receptor interacting protein 2 [Source:MGI Symbol;Acc:MGI:1891884]
ENSMUSG00000001521	1534.35	1.20565	0.269816	0.112213	2.4045	0.0161946	0.115148	1705.11	1649.98	1404.2	1378.12	6	128298124	128332814	-1	22158	protein_coding	Tulp3	tubby-like protein 3 [Source:MGI Symbol;Acc:MGI:1329045]
ENSMUSG00000001524	1612.42	1.03415	0.0484436	0.116904	0.414388	0.67859	0.915857	1595.45	1682.83	1507.83	1663.57	17	35978622	35984631	-1	14885	protein_coding	Gtf2h4	general transcription factor II H, polypeptide 4 [Source:MGI Symbol;Acc:MGI:1338799]
ENSMUSG00000001525	26051.9	1.11601	0.15835	0.114695	1.38061	0.167399	0.51581	28286	26673.7	21746.4	27501.7	17	36144813	36149198	-1	22154	protein_coding	Tubb5	tubulin, beta 5 class I [Source:MGI Symbol;Acc:MGI:107812]
ENSMUSG00000001542	4174.48	-1.13091	-0.177479	0.128184	-1.38456	0.166186	0.514189	3969.28	3867.78	5019.27	3841.58	13	75854876	75920483	1	192657	protein_coding	Ell2	elongation factor for RNA polymerase II 2 [Source:MGI Symbol;Acc:MGI:2183438]
ENSMUSG00000001552	13.3641	1.95452	0.966818	0.902142	1.07169	0.283859	0.674	19.3519	15.9554	5.60186	12.5473	11	100259784	100288589	-1	16480	protein_coding	Jup	junction plakoglobin [Source:MGI Symbol;Acc:MGI:96650]
ENSMUSG00000001555	15.2225	-1.01391	-0.0199264	0.903235	-0.0220611	0.982399	0.995352	17.2016	13.1398	24.2747	6.27367	11	100306523	100315650	1	14230	protein_coding	Fkbp10	FK506 binding protein 10 [Source:MGI Symbol;Acc:MGI:104769]
ENSMUSG00000001558	20.9418	1.64133	0.714865	0.719817	0.993121	0.320651	0.711171	33.3282	18.7711	14.9383	16.7298	11	100332743	100347848	1	66720	protein_coding	Klhl10	kelch-like 10 [Source:MGI Symbol;Acc:MGI:2181067]
ENSMUSG00000001569	4122.03	-1.10203	-0.140165	0.0967747	-1.44837	0.147515	0.480229	3752.11	4091.16	4344.24	4300.6	5	29639662	29662841	1	433864	protein_coding	Nom1	nucleolar protein with MIF4G domain 1 [Source:MGI Symbol;Acc:MGI:1861749]
ENSMUSG00000001576	4410.32	1.06601	0.0922146	0.0958301	0.962271	0.335913	0.725847	4363.84	4737.82	4219.14	4320.47	17	26780463	26875908	1	67458	protein_coding	Ergic1	endoplasmic reticulum-golgi intermediate compartment (ERGIC) 1 [Source:MGI Symbol;Acc:MGI:1914708]
ENSMUSG00000001583	10.0804	1.04306	0.0608233	1.01359	0.0600076	0.95215	0.989853	6.45062	14.0783	9.33644	10.4561	11	69741831	69749556	-1	83813	protein_coding	Tnk1	tyrosine kinase, non-receptor, 1 [Source:MGI Symbol;Acc:MGI:1930958]
ENSMUSG00000001588	21432	1.00101	0.00145907	0.0856093	0.0170434	0.986402	0.996692	21769.8	21115.6	20622.3	22220.3	11	69772393	69786365	-1	216859	protein_coding	Acap1	ArfGAP with coiled-coil, ankyrin repeat and PH domains 1 [Source:MGI Symbol;Acc:MGI:2388270]
ENSMUSG00000001627	5864.71	-1.3695	-0.453652	0.104594	-4.33728	1.4426e-05	0.000354166	4554.14	5345.07	6834.27	6725.37	12	40251566	40298503	-1	15982	protein_coding	Ifrd1	interferon-related developmental regulator 1 [Source:MGI Symbol;Acc:MGI:1316717]
ENSMUSG00000001630	916.212	-1.09033	-0.124771	0.143224	-0.871159	0.383668	0.760797	883.735	870.04	1040.08	870.994	6	146626493	146680310	1	232533	protein_coding	Stk38l	serine/threonine kinase 38 like [Source:MGI Symbol;Acc:MGI:1922250]
ENSMUSG00000001632	3476.51	-1.08428	-0.116736	0.0962308	-1.21308	0.225097	0.602201	3262.94	3408.83	3690.69	3543.58	6	113284098	113301821	1	78783	protein_coding	Brpf1	bromodomain and PHD finger containing, 1 [Source:MGI Symbol;Acc:MGI:1926033]
ENSMUSG00000001642	3804.74	-1.06794	-0.0948349	0.0943325	-1.00533	0.31474	0.70553	3641.37	3717.61	3835.41	4024.56	6	34279369	34294413	-1	11677	protein_coding	Akr1b3	aldo-keto reductase family 1, member B3 (aldose reductase) [Source:MGI Symbol;Acc:MGI:1353494]
ENSMUSG00000001657	12.9195	-1.99426	-0.995852	0.898285	-1.10861	0.267596	0.657147	10.751	6.56988	18.6729	15.6842	15	102899039	102902543	1	15426	protein_coding	Hoxc8	homeobox C8 [Source:MGI Symbol;Acc:MGI:96198]
ENSMUSG00000001661	5.79132	1.31662	0.396841	1.30002	0.305259	0.760169		7.52572	5.63133	3.73457	6.27367	15	102906689	102920313	1	15425	protein_coding	Hoxc6	homeobox C6 [Source:MGI Symbol;Acc:MGI:96197]
ENSMUSG00000001663	1021.82	-1.64714	-0.719965	0.4454	-1.61645	0.105998	0.398934	723.544	820.297	885.094	1658.34	10	75619647	75634418	-1	14871	protein_coding	Gstt1	glutathione S-transferase, theta 1 [Source:MGI Symbol;Acc:MGI:107379]
ENSMUSG00000001665	770.122	-1.22304	-0.290471	0.147452	-1.96994	0.0488453	0.245824	686.991	698.285	782.393	912.819	10	75609949	75617248	-1	103140	protein_coding	Gstt3	glutathione S-transferase, theta 3 [Source:MGI Symbol;Acc:MGI:2143526]
ENSMUSG00000001666	300.784	-1.39104	-0.476163	0.247139	-1.9267	0.054017	0.264142	263.4	240.27	427.609	271.859	10	75607064	75609248	-1	13202	protein_coding	Ddt	D-dopachrome tautomerase [Source:MGI Symbol;Acc:MGI:1298381]
ENSMUSG00000001674	6816.05	1.04457	0.0629116	0.0936241	0.671959	0.50161	0.839863	6679.62	7249.4	6857.61	6477.56	1	121481564	121495718	-1	66942	protein_coding	Ddx18	DEAD box helicase 18 [Source:MGI Symbol;Acc:MGI:1914192]
ENSMUSG00000001687	4733.11	-1.28934	-0.366638	0.0905203	-4.05034	5.11437e-05	0.0010765	4200.43	4069.57	5280.69	5381.76	5	148441445	148489599	-1	24109	protein_coding	Ubl3	ubiquitin-like 3 [Source:MGI Symbol;Acc:MGI:1344373]
ENSMUSG00000001700	329.895	-1.22777	-0.296036	0.206083	-1.43649	0.150864	0.486771	315.005	277.812	400.533	326.231	18	56533409	56636864	1	107022	protein_coding	Gramd3	GRAM domain containing 3 [Source:MGI Symbol;Acc:MGI:1914815]
ENSMUSG00000001707	1982.43	1.1002	0.137766	0.106362	1.29526	0.195231	0.56383	2063.12	2091.1	1937.31	1838.19	13	38828183	38843034	-1	66143	protein_coding	Eef1e1	eukaryotic translation elongation factor 1 epsilon 1 [Source:MGI Symbol;Acc:MGI:1913393]
ENSMUSG00000001729	9412.21	-1.11865	-0.161755	0.0850954	-1.90086	0.0573201	0.273968	8705.11	9064.56	9843.4	10035.8	12	112620255	112641318	-1	11651	protein_coding	Akt1	thymoma viral proto-oncogene 1 [Source:MGI Symbol;Acc:MGI:87986]
ENSMUSG00000001739	21.0532	-1.17969	-0.238407	0.725337	-0.328685	0.742394	0.937291	16.1265	22.5253	29.8766	15.6842	5	136995470	137004712	1	60363	protein_coding	Cldn15	claudin 15 [Source:MGI Symbol;Acc:MGI:1913103]
ENSMUSG00000001741	3381.37	1.09284	0.128079	0.107084	1.19606	0.231674	0.611798	3354.32	3707.29	3069.82	3394.06	7	83292033	83394934	-1	16170	protein_coding	Il16	interleukin 16 [Source:MGI Symbol;Acc:MGI:1270855]
ENSMUSG00000001750	5251.83	1.09559	0.131705	0.0936061	1.40701	0.159425	0.502943	5590.54	5392	4826	5198.78	19	3946050	3957133	-1	27060	protein_coding	Tcirg1	T cell, immune regulator 1, ATPase, H+ transporting, lysosomal V0 protein A3 [Source:MGI Symbol;Acc:MGI:1350931]
ENSMUSG00000001751	1070.73	1.2589	0.332165	0.161849	2.05231	0.0401396	0.217868	1253.57	1132.84	803.867	1092.66	11	100960838	100968498	1	27419	protein_coding	Naglu	alpha-N-acetylglucosaminidase (Sanfilippo disease IIIB) [Source:MGI Symbol;Acc:MGI:1351641]
ENSMUSG00000001755	1217.61	1.22291	0.290315	0.13912	2.0868	0.0369064	0.206022	1392.26	1286.76	986.861	1204.54	11	100973391	100977445	1	71743	protein_coding	Coasy	Coenzyme A synthase [Source:MGI Symbol;Acc:MGI:1918993]
ENSMUSG00000001761	4.95455	-1.46394	-0.549853	1.39169	-0.395097	0.692771		4.30041	3.75422	6.5355	5.22806	6	29735502	29761364	1	319757	protein_coding	Smo	smoothened, frizzled class receptor [Source:MGI Symbol;Acc:MGI:108075]
ENSMUSG00000001763	8.09657	-1.13143	-0.17815	1.13999	-0.156273	0.875818		8.60082	6.56988	4.66822	12.5473	6	29694221	29718558	1	232670	protein_coding	Tspan33	tetraspanin 33 [Source:MGI Symbol;Acc:MGI:1919012]
ENSMUSG00000001767	2734.68	-1.00541	-0.00778668	0.101488	-0.0767253	0.938842	0.98741	2657.65	2796.89	2816.8	2667.36	2	145759399	145776934	-1	66877	protein_coding	Crnkl1	crooked neck pre-mRNA splicing factor 1 [Source:MGI Symbol;Acc:MGI:1914127]
ENSMUSG00000001768	6.13029	-3.81359	-1.93115	1.41324	-1.36647	0.171792		3.22531	1.87711	3.73457	15.6842	2	145517135	145729536	1	74030	protein_coding	Rin2	Ras and Rab interactor 2 [Source:MGI Symbol;Acc:MGI:1921280]
ENSMUSG00000001768	6.13029	-3.81359	-1.93115	1.41324	-1.36647	0.171792		3.22531	1.87711	3.73457	15.6842	2	145517135	145729536	1	408057	protein_coding	Rin2	Ras and Rab interactor 2 [Source:MGI Symbol;Acc:MGI:1921280]
ENSMUSG00000001774	6887.78	1.2272	0.295365	0.0915726	3.22548	0.00125763	0.0159579	7288.12	7892.31	6276.89	6093.82	9	18203421	18228738	1	66917	protein_coding	Chordc1	cysteine and histidine-rich domain (CHORD)-containing, zinc-binding protein 1 [Source:MGI Symbol;Acc:MGI:1914167]
ENSMUSG00000001783	9250.78	1.08461	0.117182	0.0850338	1.37807	0.168182	0.517331	9721.08	9531.96	9043.27	8706.81	10	85774501	85793687	-1	28088	protein_coding	Rtcb	RNA 2',3'-cyclic phosphate and 5'-OH ligase [Source:MGI Symbol;Acc:MGI:106379]
ENSMUSG00000001785	3823.34	1.08928	0.123379	0.104123	1.18493	0.236045	0.616517	3754.26	4218.8	3775.65	3544.62	10	85665358	85724960	1	103136	protein_coding	Pwp1	PWP1 homolog, endonuclein [Source:MGI Symbol;Acc:MGI:1914735]
ENSMUSG00000001786	705.818	1.33488	0.416715	0.144862	2.87663	0.00401945	0.0407439	817.078	796.833	578.859	630.504	10	85857836	85887737	1	69754	protein_coding	Fbxo7	F-box protein 7 [Source:MGI Symbol;Acc:MGI:1917004]
ENSMUSG00000001794	7137.83	1.03276	0.0465098	0.108624	0.428171	0.668526	0.913208	7409.61	7095.47	6377.72	7668.51	7	29886361	29898236	-1	12336	protein_coding	Capns1	calpain, small subunit 1 [Source:MGI Symbol;Acc:MGI:88266]
ENSMUSG00000001829	1812.8	-1.16833	-0.224443	0.108117	-2.07593	0.0379	0.210094	1661.03	1682.83	1910.23	1997.12	7	101312840	101444713	1	20480	protein_coding	Clpb	ClpB caseinolytic peptidase B [Source:MGI Symbol;Acc:MGI:1100517]
ENSMUSG00000001833	12223.3	1.01158	0.0166146	0.0844099	0.196832	0.843959	0.965826	12158.3	12429.3	12446.4	11859.3	9	25163735	25219867	1	235072	protein_coding	Septin7	septin 7 [Source:MGI Symbol;Acc:MGI:1335094]
ENSMUSG00000001844	1030.31	-1.18207	-0.241319	0.140214	-1.72107	0.0852377	0.351081	936.415	951.694	1013.94	1219.18	5	143302244	143315011	-1	72881	protein_coding	Zdhhc4	zinc finger, DHHC domain containing 4 [Source:MGI Symbol;Acc:MGI:1920131]
ENSMUSG00000001847	11278.3	-1.34892	-0.431807	0.104421	-4.13526	3.54548e-05	0.000784334	9474.88	9730	11813.4	14094.8	5	143489389	143513791	-1	19353	protein_coding	Rac1	Rac family small GTPase 1 [Source:MGI Symbol;Acc:MGI:97845]
ENSMUSG00000001855	4289.42	-1.11636	-0.158806	0.0951881	-1.66834	0.095248	0.374941	3896.17	4210.36	4530.97	4520.18	2	31864448	31943987	1	227720	protein_coding	Nup214	nucleoporin 214 [Source:MGI Symbol;Acc:MGI:1095411]
ENSMUSG00000001891	2692.59	-1.17112	-0.227889	0.12394	-1.8387	0.0659597	0.300472	2526.49	2433.67	2591.79	3218.39	11	21271138	21321201	-1	216558	protein_coding	Ugp2	UDP-glucose pyrophosphorylase 2 [Source:MGI Symbol;Acc:MGI:2183447]
ENSMUSG00000001909	6842.26	1.11819	0.161166	0.0907831	1.77529	0.0758508	0.327511	6940.87	7506.56	6452.41	6469.2	8	85412936	85426437	1	212528	protein_coding	Trmt1	tRNA methyltransferase 1 [Source:MGI Symbol;Acc:MGI:1289155]
ENSMUSG00000001910	5835.31	1.07986	0.110838	0.0874512	1.26742	0.205004	0.5774	6091.53	6027.4	5660.68	5561.61	8	85397108	85414531	-1	66830	protein_coding	Nacc1	nucleus accumbens associated 1, BEN and BTB (POZ) domain containing [Source:MGI Symbol;Acc:MGI:1914080]
ENSMUSG00000001911	434.905	1.48537	0.570822	0.195051	2.92653	0.00342769	0.0359682	511.749	528.406	401.467	297.999	8	85426505	85526973	-1	18032	protein_coding	Nfix	nuclear factor I/X [Source:MGI Symbol;Acc:MGI:97311]
ENSMUSG00000001918	3931.8	1.03912	0.0553632	0.0956784	0.578639	0.562833	0.872008	3868.22	4145.6	3819.54	3893.86	7	16515265	16532199	1	20514	protein_coding	Slc1a5	solute carrier family 1 (neutral amino acid transporter), member 5 [Source:MGI Symbol;Acc:MGI:105305]
ENSMUSG00000001924	25408.3	-1.06759	-0.0943563	0.086525	-1.09051	0.275489	0.665048	23627.5	25526.8	25636	26842.9	X	20524565	20549418	1	22201	protein_coding	Uba1	ubiquitin-like modifier activating enzyme 1 [Source:MGI Symbol;Acc:MGI:98890]
ENSMUSG00000001942	92.616	1.00028	0.000403876	0.365059	0.00110633	0.999117	0.999874	106.435	78.8386	77.4924	107.698	9	37466994	37560951	1	22619	protein_coding	Siae	sialic acid acetylesterase [Source:MGI Symbol;Acc:MGI:104803]
ENSMUSG00000001946	21.7974	-1.3677	-0.451751	0.682412	-0.661991	0.507977	0.842911	16.1265	20.6482	24.2747	26.1403	9	37439374	37449615	1	69524	protein_coding	Esam	endothelial cell-specific adhesion molecule [Source:MGI Symbol;Acc:MGI:1916774]
ENSMUSG00000001948	7.12325	-4.72322	-2.23977	1.26644	-1.76855	0.0769687		2.15021	2.81566	13.071	10.4561	9	37514586	37525018	-1	20686	protein_coding	Spa17	sperm autoantigenic protein 17 [Source:MGI Symbol;Acc:MGI:1333778]
ENSMUSG00000001962	3281.33	-1.015	-0.0214836	0.0948797	-0.22643	0.820867	0.960208	3267.24	3246.46	3267.75	3343.87	X	73356639	73363755	1	108160	protein_coding	Fam50a	family with sequence similarity 50, member A [Source:MGI Symbol;Acc:MGI:1351626]
ENSMUSG00000001964	1857.08	1.02037	0.0290958	0.113367	0.25665	0.797449	0.955518	1890.03	1861.15	1737.51	1939.61	X	73298293	73305154	1	13726	protein_coding	Emd	emerin [Source:MGI Symbol;Acc:MGI:108117]
ENSMUSG00000001983	541.22	1.13062	0.177108	0.159158	1.11279	0.265801	0.654353	599.908	549.054	500.433	515.486	11	105956887	105964438	1	70207	protein_coding	Taco1	translational activator of mitochondrially encoded cytochrome c oxidase I [Source:MGI Symbol;Acc:MGI:1917457]
ENSMUSG00000001986	6.41591	-1.16762	-0.223573	1.23599	-0.180886	0.856457		4.30041	7.50844	6.5355	7.31928	X	40489731	40767478	1	53623	protein_coding	Gria3	glutamate receptor, ionotropic, AMPA3 (alpha 3) [Source:MGI Symbol;Acc:MGI:95810]
ENSMUSG00000001988	91.2539	-1.12997	-0.176287	0.349085	-0.504998	0.61356	0.894377	94.6091	76.9615	104.568	88.877	7	16189646	16211653	-1	18142	protein_coding	Npas1	neuronal PAS domain protein 1 [Source:MGI Symbol;Acc:MGI:109205]
ENSMUSG00000001995	48.6717	-1.3527	-0.435844	0.540719	-0.806045	0.420217	0.78822	36.5535	45.9892	32.6775	79.4665	8	126144802	126296547	-1	244668	protein_coding	Sipa1l2	signal-induced proliferation-associated 1 like 2 [Source:MGI Symbol;Acc:MGI:2676970]
ENSMUSG00000001998	1383.41	-1.015	-0.0214766	0.116441	-0.184442	0.853667	0.967502	1336.35	1409.71	1412.6	1374.98	2	126850637	126909829	1	108011	protein_coding	Ap4e1	adaptor-related protein complex AP-4, epsilon 1 [Source:MGI Symbol;Acc:MGI:1336993]
ENSMUSG00000001999	676.076	1.19243	0.253905	0.170809	1.48648	0.137152	0.460426	696.667	773.369	536.845	697.423	2	126912585	126939004	1	109778	protein_coding	Blvra	biliverdin reductase A [Source:MGI Symbol;Acc:MGI:88170]
ENSMUSG00000002006	53.4008	1.09362	0.129116	0.44548	0.289836	0.771942	0.947257	59.1307	52.5591	56.9523	44.9613	X	72836965	72868575	-1	245469	protein_coding	Pdzd4	PDZ domain containing 4 [Source:MGI Symbol;Acc:MGI:2443483]
ENSMUSG00000002007	410.187	1.50234	0.587213	0.219238	2.67843	0.0073968	0.0640474	496.698	488.987	396.799	258.266	X	72818011	72822531	1	56504	protein_coding	Srpk3	serine/arginine-rich protein specific kinase 3 [Source:MGI Symbol;Acc:MGI:1891338]
ENSMUSG00000002010	5711.34	1.02932	0.0416896	0.0923667	0.45135	0.651738	0.908843	5693.75	5893.18	5429.14	5829.28	X	72822569	72830503	-1	15929	protein_coding	Idh3g	isocitrate dehydrogenase 3 (NAD+), gamma [Source:MGI Symbol;Acc:MGI:1099463]
ENSMUSG00000002014	2073.86	1.05229	0.0735387	0.10957	0.671157	0.50212	0.839863	2185.68	2067.64	1937.31	2104.82	X	72830634	72834436	1	20832	protein_coding	Ssr4	signal sequence receptor, delta [Source:MGI Symbol;Acc:MGI:1099464]
ENSMUSG00000002015	4348.02	1.04094	0.0578813	0.0933168	0.620267	0.535082	0.858612	4393.95	4475.97	4137.91	4384.25	X	72729784	72759781	-1	27061	protein_coding	Bcap31	B cell receptor associated protein 31 [Source:MGI Symbol;Acc:MGI:1350933]
ENSMUSG00000002017	3421.89	1.06762	0.0944024	0.101972	0.925769	0.354566	0.740015	3385.5	3681.95	3423.67	3196.43	17	75844081	75858941	-1	72722	protein_coding	Fam98a	family with sequence similarity 98, member A [Source:MGI Symbol;Acc:MGI:1919972]
ENSMUSG00000002020	402.696	1.28141	0.357734	0.180863	1.97793	0.0479364	0.242922	481.646	423.288	348.249	357.599	12	84829986	84923306	-1	16997	protein_coding	Ltbp2	latent transforming growth factor beta binding protein 2 [Source:MGI Symbol;Acc:MGI:99502]
ENSMUSG00000002028	5233.17	1.00772	0.0110893	0.1171	0.0946997	0.924553	0.985268	5084.16	5422.97	5765.25	4660.29	9	44714652	44792594	-1	214162	protein_coding	Kmt2a	lysine (K)-specific methyltransferase 2A [Source:MGI Symbol;Acc:MGI:96995]
ENSMUSG00000002031	1413.19	1.0233	0.0332339	0.114268	0.290841	0.771173	0.947257	1450.31	1408.77	1396.73	1396.94	9	44679205	44704744	1	76568	protein_coding	Ift46	intraflagellar transport 46 [Source:MGI Symbol;Acc:MGI:1923818]
ENSMUSG00000002032	8.42834	-1.35815	-0.441644	1.123	-0.393271	0.694119		9.67593	4.69277	13.071	6.27367	9	44705066	44710604	-1	71687	protein_coding	Tmem25	transmembrane protein 25 [Source:MGI Symbol;Acc:MGI:1918937]
ENSMUSG00000002033	87.0804	-3.1686	-1.66384	0.386529	-4.30457	1.67307e-05	0.000403349	46.2294	37.5422	156.852	107.698	9	44880870	44891729	-1	12502	protein_coding	Cd3g	CD3 antigen, gamma polypeptide [Source:MGI Symbol;Acc:MGI:88333]
ENSMUSG00000002043	2010.41	1.03907	0.0552896	0.150682	0.36693	0.713671	0.928914	2269.54	1828.3	1719.77	2224.02	7	19242320	19250070	1	67091	protein_coding	Trappc6a	trafficking protein particle complex 6A [Source:MGI Symbol;Acc:MGI:1914341]
ENSMUSG00000002052	9524.53	-1.08011	-0.111175	0.0862866	-1.28844	0.197593	0.566763	9042.69	9272.92	10152.4	9630.08	11	78097572	78136813	-1	20926	protein_coding	Supt6	SPT6, histone chaperone and transcription elongation factor [Source:MGI Symbol;Acc:MGI:107726]
ENSMUSG00000002055	1723.57	-4.80287	-2.2639	0.126119	-17.9505	4.75941e-72	1.54822e-69	554.753	632.586	3008.2	2698.72	11	78192355	78213283	1	54141	protein_coding	Spag5	sperm associated antigen 5 [Source:MGI Symbol;Acc:MGI:1927470]
ENSMUSG00000002058	2895.59	1.12811	0.173904	0.116552	1.49207	0.135682	0.457374	3202.73	2936.74	2498.43	2944.44	11	78234308	78239990	1	22248	protein_coding	Unc119	unc-119 lipid binding chaperone [Source:MGI Symbol;Acc:MGI:1328357]
ENSMUSG00000002059	23.7513	-1.02635	-0.0375271	0.721485	-0.0520137	0.958518	0.99133	22.5772	24.4024	35.4785	12.5473	11	78079256	78083019	1	19376	protein_coding	Rab34	RAB34, member RAS oncogene family [Source:MGI Symbol;Acc:MGI:104606]
ENSMUSG00000002064	1391.14	-1.08781	-0.121425	0.12445	-0.975695	0.329215	0.72019	1339.58	1325.24	1349.11	1550.64	11	78136572	78146322	1	20316	protein_coding	Sdf2	stromal cell derived factor 2 [Source:MGI Symbol;Acc:MGI:108019]
ENSMUSG00000002068	809.733	-1.30924	-0.388734	0.145089	-2.67927	0.00737829	0.0639258	754.722	648.541	936.444	899.226	7	37797409	37806959	-1	12447	protein_coding	Ccne1	cyclin E1 [Source:MGI Symbol;Acc:MGI:88316]
ENSMUSG00000002076	4.35031	-2.48229	-1.31167	1.67729	-0.78202	0.434203		2.15021	2.81566	0.933644	11.5017	17	32163743	32255323	-1	74377	protein_coding	Hsf2bp	heat shock transcription factor 2 binding protein [Source:MGI Symbol;Acc:MGI:1921627]
ENSMUSG00000002083	445.576	1.21217	0.277596	0.187048	1.48409	0.137785	0.461206	520.35	456.138	360.386	445.431	7	16042318	16052130	1	170770	protein_coding	Bbc3	BCL2 binding component 3 [Source:MGI Symbol;Acc:MGI:2181667]
ENSMUSG00000002100	222.292	-1.43211	-0.518141	0.243955	-2.12392	0.033677	0.19316	155.89	209.298	260.487	263.494	2	90948489	90966861	1	17868	protein_coding	Mybpc3	myosin binding protein C, cardiac [Source:MGI Symbol;Acc:MGI:102844]
ENSMUSG00000002102	6278.71	-1.14316	-0.193025	0.0867749	-2.22443	0.0261193	0.16115	5834.58	5883.8	6634.47	6761.97	2	90884354	90896714	1	19182	protein_coding	Psmc3	proteasome (prosome, macropain) 26S subunit, ATPase 3 [Source:MGI Symbol;Acc:MGI:1098754]
ENSMUSG00000002103	134.051	1.14567	0.196194	0.284302	0.690093	0.490136	0.831987	148.364	137.968	122.307	127.565	2	91033230	91044443	1	11432	protein_coding	Acp2	acid phosphatase 2, lysosomal [Source:MGI Symbol;Acc:MGI:87882]
ENSMUSG00000002105	508.852	-1.03985	-0.0563707	0.159792	-0.352777	0.724256	0.931844	504.223	493.68	520.973	516.532	2	90892136	90900762	-1	68427	protein_coding	Slc39a13	solute carrier family 39 (metal ion transporter), member 13 [Source:MGI Symbol;Acc:MGI:1915677]
ENSMUSG00000002107	7336.69	1.07463	0.103843	0.0903193	1.14974	0.250252	0.636096	7513.9	7687.7	7340.31	6804.84	2	6544505	7514374	-1	14007	protein_coding	Celf2	CUGBP, Elav-like family member 2 [Source:MGI Symbol;Acc:MGI:1338822]
ENSMUSG00000002108	52.2264	-1.91976	-0.940923	0.462792	-2.03314	0.0420381	0.22426	38.7037	32.8494	57.8859	79.4665	2	91014406	91033179	-1	22259	protein_coding	Nr1h3	nuclear receptor subfamily 1, group H, member 3 [Source:MGI Symbol;Acc:MGI:1352462]
ENSMUSG00000002109	259.951	1.10256	0.140859	0.216402	0.650914	0.515102	0.848082	282.752	262.795	264.221	230.035	2	91041917	91067327	-1	107986	protein_coding	Ddb2	damage specific DNA binding protein 2 [Source:MGI Symbol;Acc:MGI:1355314]
ENSMUSG00000002111	9931.06	-1.27689	-0.352635	0.119354	-2.95454	0.00313137	0.0335977	8622.33	8823.35	9750.04	12528.5	2	90912735	90946101	1	20375	protein_coding	Spi1	spleen focus forming virus (SFFV) proviral integration oncogene [Source:MGI Symbol;Acc:MGI:98282]
ENSMUSG00000002129	10738	1.03716	0.0526342	0.0881422	0.597151	0.550407	0.866092	10552.1	11315.2	10751.8	10332.7	11	4110350	4132541	1	67465	protein_coding	Sf3a1	splicing factor 3a, subunit 1 [Source:MGI Symbol;Acc:MGI:1914715]
ENSMUSG00000002147	9700.32	1.03041	0.043216	0.101768	0.424652	0.67109	0.913896	9972.66	9717.79	8795.86	10315	10	127478855	127496826	1	20852	protein_coding	Stat6	signal transducer and activator of transcription 6 [Source:MGI Symbol;Acc:MGI:103034]
ENSMUSG00000002190	432.547	1.0115	0.0164906	0.196413	0.0839589	0.933089	0.987039	374.136	495.557	453.751	406.743	8	84116496	84155181	1	12745	protein_coding	Clgn	calmegin [Source:MGI Symbol;Acc:MGI:107472]
ENSMUSG00000002204	6832.51	1.32374	0.404617	0.08766	4.61575	3.91671e-06	0.000108643	7808.47	7759.97	5740.97	6020.63	7	44221804	44236286	1	16541	protein_coding	Napsa	napsin A aspartic peptidase [Source:MGI Symbol;Acc:MGI:109365]
ENSMUSG00000002205	2051.57	-1.08181	-0.113452	0.12039	-0.942369	0.346004	0.734093	2013.67	1927.79	1955.05	2309.76	7	44397837	44426939	1	101568	protein_coding	Vrk3	vaccinia related kinase 3 [Source:MGI Symbol;Acc:MGI:2182465]
ENSMUSG00000002210	1777.8	1.06165	0.0863076	0.118706	0.727072	0.467182	0.819048	1840.58	1820.8	1601.2	1848.64	7	24099044	24122203	1	71997	protein_coding	Smg9	smg-9 homolog, nonsense mediated mRNA decay factor (C. elegans) [Source:MGI Symbol;Acc:MGI:1919247]
ENSMUSG00000002221	2662.11	-1.07019	-0.0978687	0.106895	-0.915556	0.3599	0.743755	2427.58	2715.24	2707.57	2798.06	5	27945078	27996689	-1	55982	protein_coding	Paxip1	PAX interacting (with transcription-activation domain) protein 1 [Source:MGI Symbol;Acc:MGI:1890430]
ENSMUSG00000002222	3690.5	1.08254	0.114418	0.0947863	1.20711	0.22739	0.605736	3814.47	3859.34	3635.61	3452.61	6	71365618	71417621	-1	68477	protein_coding	Rmnd5a	required for meiotic nuclear division 5 homolog A [Source:MGI Symbol;Acc:MGI:1915727]
ENSMUSG00000002227	773.459	1.20489	0.268896	0.144217	1.86453	0.062248	0.289553	899.861	791.201	701.166	701.605	3	104702152	104725879	-1	17454	protein_coding	Mov10	Mov10 RISC complex RNA helicase [Source:MGI Symbol;Acc:MGI:97054]
ENSMUSG00000002228	59.3933	-1.01276	-0.0182992	0.457941	-0.0399596	0.968125	0.99133	74.1821	44.1121	69.0896	50.1894	3	104688372	104693334	1	71887	protein_coding	Ppm1j	protein phosphatase 1J [Source:MGI Symbol;Acc:MGI:1919137]
ENSMUSG00000002233	113.097	-1.81214	-0.857693	0.311255	-2.7556	0.00585843	0.0539032	76.3323	84.4699	149.383	142.203	3	104695691	104701775	1	11853	protein_coding	Rhoc	ras homolog family member C [Source:MGI Symbol;Acc:MGI:106028]
ENSMUSG00000002249	3.68781	6.72807	2.75019	1.89811	1.44891	0.147363		5.37552	7.50844	1.86729	0	17	28550645	28569791	-1	21678	protein_coding	Tead3	TEA domain family member 3 [Source:MGI Symbol;Acc:MGI:109241]
ENSMUSG00000002250	4365.97	1.02863	0.0407173	0.145349	0.280134	0.779374	0.949532	4619.72	4234.76	3567.45	5041.94	17	28451674	28520448	1	19015	protein_coding	Ppard	peroxisome proliferator activator receptor delta [Source:MGI Symbol;Acc:MGI:101884]
ENSMUSG00000002250	4365.97	1.02863	0.0407173	0.145349	0.280134	0.779374	0.949532	4619.72	4234.76	3567.45	5041.94	17	28451674	28520448	1	69050	protein_coding	Ppard	peroxisome proliferator activator receptor delta [Source:MGI Symbol;Acc:MGI:101884]
ENSMUSG00000002257	4882.39	1.03178	0.0451304	0.111304	0.40547	0.685132	0.917462	5062.66	4854.2	4364.78	5247.92	17	28426752	28447582	1	23853	protein_coding	Def6	differentially expressed in FDCP 6 [Source:MGI Symbol;Acc:MGI:1346328]
ENSMUSG00000002274	516.941	1.05322	0.0748089	0.16369	0.457017	0.647659	0.907388	535.401	525.591	533.11	473.662	17	26012195	26016110	-1	70083	protein_coding	Metrn	meteorin, glial cell differentiation regulator [Source:MGI Symbol;Acc:MGI:1917333]
ENSMUSG00000002279	642.179	1.28698	0.363995	0.163694	2.22363	0.0261735	0.161405	768.699	676.698	511.637	611.683	17	25798059	25881800	1	76483	protein_coding	Lmf1	lipase maturation factor 1 [Source:MGI Symbol;Acc:MGI:1923733]
ENSMUSG00000002280	2323.33	1.04249	0.0600358	0.105459	0.569279	0.569167	0.873617	2367.38	2375.48	2180.06	2370.4	17	25992750	26002306	1	67563	protein_coding	Ciao3	cytosolic iron-sulfur assembly component 3 [Source:MGI Symbol;Acc:MGI:1914813]
ENSMUSG00000002289	714.96	1.09358	0.129053	0.147718	0.873646	0.382311	0.759792	748.272	745.212	638.612	727.746	17	33992724	34000804	-1	57875	protein_coding	Angptl4	angiopoietin-like 4 [Source:MGI Symbol;Acc:MGI:1888999]
ENSMUSG00000002297	2588.79	-2.18063	-1.12475	0.103468	-10.8705	1.59361e-27	1.79601e-25	1577.18	1678.14	3634.67	3465.16	5	8446973	8472716	-1	27214	protein_coding	Dbf4	DBF4 zinc finger [Source:MGI Symbol;Acc:MGI:1351328]
ENSMUSG00000002307	2502.02	-1.04472	-0.0631222	0.100402	-0.628696	0.529548	0.8561	2399.63	2494.68	2557.25	2556.52	17	34128388	34134564	1	13163	protein_coding	Daxx	Fas death domain-associated protein [Source:MGI Symbol;Acc:MGI:1197015]
ENSMUSG00000002308	619.805	1.19751	0.260041	0.154373	1.68449	0.0920865	0.36714	689.141	661.681	530.31	598.09	17	34062065	34068748	1	54219	protein_coding	Cd320	CD320 antigen [Source:MGI Symbol;Acc:MGI:1860083]
ENSMUSG00000002319	2304.83	-1.0609	-0.0852927	0.101104	-0.843616	0.398884	0.772691	2234.06	2239.39	2381.72	2364.13	14	55862857	55873414	-1	75751	protein_coding	Ipo4	importin 4 [Source:MGI Symbol;Acc:MGI:1923001]
ENSMUSG00000002320	1318.78	1.03893	0.0551047	0.11845	0.465214	0.641778	0.905735	1341.73	1345.89	1250.15	1337.34	14	55873422	55881263	-1	74140	protein_coding	Tm9sf1	transmembrane 9 superfamily member 1 [Source:MGI Symbol;Acc:MGI:1921390]
ENSMUSG00000002324	6.14618	1.14105	0.190361	1.32699	0.143453	0.885932		7.52572	5.63133	9.33644	2.09122	14	55855494	55862852	1	56739	protein_coding	Rec8	REC8 meiotic recombination protein [Source:MGI Symbol;Acc:MGI:1929645]
ENSMUSG00000002325	1554.74	-1.01961	-0.0280165	0.117961	-0.237507	0.812264	0.958751	1595.45	1483.85	1502.23	1637.43	14	55841028	55847487	1	16391	protein_coding	Irf9	interferon regulatory factor 9 [Source:MGI Symbol;Acc:MGI:107587]
ENSMUSG00000002326	691.199	-1.08747	-0.120976	0.153885	-0.786148	0.431781	0.796094	609.583	714.24	696.498	744.475	14	55909398	55916657	1	105446	protein_coding	Gmpr2	guanosine monophosphate reductase 2 [Source:MGI Symbol;Acc:MGI:1917903]
ENSMUSG00000002329	1023.42	1.37152	0.455773	0.127738	3.56805	0.000359653	0.00555408	1224.54	1143.16	857.085	868.903	14	55895336	55897965	-1	67881	protein_coding	Mdp1	magnesium-dependent phosphatase 1 [Source:MGI Symbol;Acc:MGI:1915131]
ENSMUSG00000002332	1481.17	-1.21991	-0.28677	0.15936	-1.79951	0.0719377	0.316133	1328.83	1339.32	1347.25	1909.29	14	55976477	55983147	-1	52585	protein_coding	Dhrs1	dehydrogenase/reductase (SDR family) member 1 [Source:MGI Symbol;Acc:MGI:1196314]
ENSMUSG00000002342	1671.86	1.02265	0.0323146	0.110135	0.29341	0.769209	0.946477	1710.49	1670.63	1620.81	1685.53	8	70625006	70636331	1	234371	protein_coding	Tmem161a	transmembrane protein 161A [Source:MGI Symbol;Acc:MGI:2384577]
ENSMUSG00000002343	1649.09	-1.15779	-0.211371	0.122372	-1.72728	0.0841179	0.348431	1510.52	1545.8	1633.88	1906.15	8	70672822	70687116	-1	76813	protein_coding	Armc6	armadillo repeat containing 6 [Source:MGI Symbol;Acc:MGI:1924063]
ENSMUSG00000002345	692.788	-1.03215	-0.0456547	0.1466	-0.311424	0.755478	0.942659	684.841	678.575	668.489	739.247	8	70592149	70599969	1	72368	protein_coding	Borcs8	BLOC-1 related complex subunit 8 [Source:MGI Symbol;Acc:MGI:1919618]
ENSMUSG00000002346	201.851	1.25937	0.3327	0.238573	1.39454	0.163154	0.509208	234.372	215.868	186.729	170.435	8	70636990	70664955	-1	73095	protein_coding	Slc25a42	solute carrier family 25, member 42 [Source:MGI Symbol;Acc:MGI:1920345]
ENSMUSG00000002365	2655.53	1.02184	0.03117	0.100209	0.311049	0.755763	0.942659	2686.68	2681.45	2556.32	2697.68	17	5891604	5982229	1	66616	protein_coding	Snx9	sorting nexin 9 [Source:MGI Symbol;Acc:MGI:1913866]
ENSMUSG00000002372	5392.37	1.02221	0.031688	0.0909664	0.348348	0.727579	0.932937	5307.78	5594.72	5251.74	5415.22	17	56980294	57018764	1	71810	protein_coding	Ranbp3	RAN binding protein 3 [Source:MGI Symbol;Acc:MGI:1919060]
ENSMUSG00000002379	574.176	-1.01249	-0.0179022	0.152649	-0.117277	0.906641	0.97965	576.255	565.01	575.124	580.314	17	57024767	57029141	1	69875	protein_coding	Ndufa11	NADH:ubiquinone oxidoreductase subunit A11 [Source:MGI Symbol;Acc:MGI:1917125]
ENSMUSG00000002384	2.37561	1.53605	0.619223	2.23884	0.276582	0.782101		1.0751	4.69277	3.73457	0	4	122998958	123025892	1	12164	protein_coding	Bmp8b	bone morphogenetic protein 8b [Source:MGI Symbol;Acc:MGI:107335]
ENSMUSG00000002393	309.638	-1.05472	-0.0768606	0.203668	-0.377382	0.70589	0.924983	279.527	322.863	301.567	334.596	8	71826767	71834604	-1	13864	protein_coding	Nr2f6	nuclear receptor subfamily 2, group F, member 6 [Source:MGI Symbol;Acc:MGI:1352453]
ENSMUSG00000002395	2000.93	1.06885	0.096063	0.12599	0.762466	0.445782	0.805384	2053.45	2080.78	1737.51	2132	8	71819492	71822376	1	67023	protein_coding	Use1	unconventional SNARE in the ER 1 homolog (S. cerevisiae) [Source:MGI Symbol;Acc:MGI:1914273]
ENSMUSG00000002396	466.359	-1.12973	-0.175978	0.176065	-0.999506	0.317549	0.708067	478.421	397.947	497.632	491.437	8	71823942	71832005	1	77090	protein_coding	Ocel1	occludin/ELL domain containing 1 [Source:MGI Symbol;Acc:MGI:1924340]
ENSMUSG00000002409	231.805	1.10115	0.13901	0.2268	0.612918	0.539931	0.860715	256.95	229.007	209.136	232.126	7	27878894	27886719	1	13549	protein_coding	Dyrk1b	dual-specificity tyrosine-(Y)-phosphorylation regulated kinase 1b [Source:MGI Symbol;Acc:MGI:1330302]
ENSMUSG00000002413	1381.49	1.06378	0.0892025	0.124264	0.717848	0.472851	0.822554	1444.94	1404.08	1428.47	1248.46	6	39580171	39702397	-1	109880	protein_coding	Braf	Braf transforming gene [Source:MGI Symbol;Acc:MGI:88190]
ENSMUSG00000002416	151.733	-1.04873	-0.0686424	0.311404	-0.220429	0.825537	0.960747	170.941	125.766	185.795	124.428	6	39569508	39580316	1	68198	protein_coding	Ndufb2	NADH:ubiquinone oxidoreductase subunit B2 [Source:MGI Symbol;Acc:MGI:1915448]
ENSMUSG00000002428	2797.93	-1.07097	-0.0989233	0.102782	-0.962454	0.335821	0.725847	2730.76	2673.94	3020.34	2766.69	3	20111975	20172654	1	20585	protein_coding	Hltf	helicase-like transcription factor [Source:MGI Symbol;Acc:MGI:1196437]
ENSMUSG00000002455	6182.09	1.03541	0.0502089	0.0873321	0.574919	0.565346	0.872901	6304.4	6275.18	6165.78	5982.99	2	181233661	181297453	1	68879	protein_coding	Prpf6	pre-mRNA splicing factor 6 [Source:MGI Symbol;Acc:MGI:1922946]
ENSMUSG00000002458	4515.96	-1.13968	-0.188628	0.0968632	-1.94737	0.0514909	0.254926	4253.11	4188.77	4584.19	5037.76	2	181330212	181335770	-1	56470	protein_coding	Rgs19	regulator of G-protein signaling 19 [Source:MGI Symbol;Acc:MGI:1915153]
ENSMUSG00000002459	2.46451	1.01528	0.0218712	1.92547	0.0113589	0.990937		2.15021	2.81566	2.80093	2.09122	1	4979799	5140508	-1	58175	protein_coding	Rgs20	regulator of G-protein signaling 20 [Source:MGI Symbol;Acc:MGI:1929866]
ENSMUSG00000002477	3627.86	1.03062	0.0435142	0.107278	0.40562	0.685022	0.917462	3703.73	3662.24	3838.21	3307.27	18	10617775	10642079	1	20641	protein_coding	Snrpd1	small nuclear ribonucleoprotein D1 [Source:MGI Symbol;Acc:MGI:98344]
ENSMUSG00000002486	479.937	-1.14403	-0.194121	0.164552	-1.17969	0.238123	0.618987	444.018	451.445	526.575	497.711	5	114845821	114860388	1	77832	protein_coding	Tchp	trichoplein, keratin filament binding [Source:MGI Symbol;Acc:MGI:1925082]
ENSMUSG00000002496	3051.01	-1.05585	-0.0784111	0.096238	-0.814762	0.415208	0.78486	2968.36	2967.71	3090.36	3177.61	17	24814790	24851604	-1	22084	protein_coding	Tsc2	TSC complex subunit 2 [Source:MGI Symbol;Acc:MGI:102548]
ENSMUSG00000002500	20.3232	-1.12901	-0.175064	0.728394	-0.240342	0.810065	0.958141	19.3519	18.7711	14.9383	28.2315	17	24946794	24955117	1	66211	protein_coding	Rpl3l	ribosomal protein L3-like [Source:MGI Symbol;Acc:MGI:1913461]
ENSMUSG00000002504	51.2576	2.0911	1.06426	0.455907	2.33438	0.0195759	0.131421	72.0319	66.6374	30.8102	35.5508	17	24858260	24869301	-1	65962	protein_coding	Slc9a3r2	solute carrier family 9 (sodium/hydrogen exchanger), member 3 regulator 2 [Source:MGI Symbol;Acc:MGI:1890662]
ENSMUSG00000002524	8805.27	-1.04385	-0.0619094	0.0913885	-0.677431	0.498132	0.837913	8334.2	8897.5	8678.22	9311.17	15	75942031	75952773	-1	67959	protein_coding	Puf60	poly-U binding splicing factor 60 [Source:MGI Symbol;Acc:MGI:1915209]
ENSMUSG00000002546	4267.82	-1.04978	-0.0700902	0.0913204	-0.767519	0.442773	0.803729	4132.7	4195.34	4317.17	4426.07	2	32177396	32197933	1	99412	protein_coding	Golga2	golgi autoantigen, golgin subfamily a, 2 [Source:MGI Symbol;Acc:MGI:2139395]
ENSMUSG00000002550	1773.93	1.00162	0.00233001	0.116851	0.0199399	0.984091	0.995959	1785.75	1764.48	1658.15	1887.33	2	32145014	32150171	-1	22245	protein_coding	Uck1	uridine-cytidine kinase 1 [Source:MGI Symbol;Acc:MGI:98904]
ENSMUSG00000002565	540.161	1.16564	0.221118	0.214064	1.03295	0.301625	0.693922	566.579	596.921	613.404	383.739	12	40109768	40184227	-1	20259	protein_coding	Scin	scinderin [Source:MGI Symbol;Acc:MGI:1306794]
ENSMUSG00000002578	553.755	1.14736	0.198316	0.156066	1.27072	0.203829	0.576465	597.757	585.658	500.433	531.171	10	128466712	128505227	-1	22781	protein_coding	Ikzf4	IKAROS family zinc finger 4 [Source:MGI Symbol;Acc:MGI:1343139]
ENSMUSG00000002580	273.945	1.19074	0.251856	0.20724	1.21529	0.224256	0.601645	301.029	294.706	259.553	240.491	11	98328534	98329817	-1	103742	protein_coding	Mien1	migration and invasion enhancer 1 [Source:MGI Symbol;Acc:MGI:1913678]
ENSMUSG00000002588	3.6048	-1.44631	-0.532373	1.72823	-0.308045	0.758048		2.15021	3.75422	7.46915	1.04561	6	5168090	5193946	-1	18979	protein_coding	Pon1	paraoxonase 1 [Source:MGI Symbol;Acc:MGI:103295]
ENSMUSG00000002602	1519.05	-1.22243	-0.28975	0.124394	-2.32928	0.0198443	0.132722	1394.41	1339.32	1546.11	1796.36	7	25456698	25488130	-1	26362	protein_coding	Axl	AXL receptor tyrosine kinase [Source:MGI Symbol;Acc:MGI:1347244]
ENSMUSG00000002603	13521.5	-1.01694	-0.0242317	0.107	-0.226466	0.820839	0.960208	13348.5	13466.4	12306.4	14964.8	7	25386427	25404502	1	21803	protein_coding	Tgfb1	transforming growth factor, beta 1 [Source:MGI Symbol;Acc:MGI:98725]
ENSMUSG00000002608	2989.97	1.04228	0.0597375	0.100863	0.592266	0.553673	0.867619	2930.73	3172.31	2891.49	2965.35	7	25410531	25418513	-1	52132	protein_coding	Ccdc97	coiled-coil domain containing 97 [Source:MGI Symbol;Acc:MGI:1196455]
ENSMUSG00000002617	479.441	1.33436	0.416151	0.173189	2.40288	0.0162666	0.11558	593.457	503.065	406.135	415.108	17	23392843	23412226	-1	22700	protein_coding	Zfp40	zinc finger protein 40 [Source:MGI Symbol;Acc:MGI:99185]
ENSMUSG00000002625	3039.82	1.08974	0.123989	0.0958195	1.29398	0.195671	0.564128	3161.88	3178.88	2923.24	2895.3	17	32540398	32569581	-1	54194	protein_coding	Akap8l	A kinase (PRKA) anchor protein 8-like [Source:MGI Symbol;Acc:MGI:1860606]
ENSMUSG00000002635	1615.05	1.14831	0.199518	0.110471	1.80607	0.0709075	0.314027	1699.74	1753.22	1507.83	1499.41	7	33883924	33896086	-1	68079	protein_coding	Pdcd2l	programmed cell death 2-like [Source:MGI Symbol;Acc:MGI:1915329]
ENSMUSG00000002658	8286.44	-1.14408	-0.194183	0.0863184	-2.24961	0.0244738	0.154179	7544	7914.83	8898.56	8788.36	17	57310405	57318288	-1	98053	protein_coding	Gtf2f1	general transcription factor IIF, polypeptide 1 [Source:MGI Symbol;Acc:MGI:1923848]
ENSMUSG00000002660	1411.16	1.03947	0.0558486	0.119997	0.465417	0.641633	0.905735	1364.31	1512.01	1364.05	1404.26	17	57297305	57303188	1	53895	protein_coding	Clpp	caseinolytic mitochondrial matrix peptidase proteolytic subunit [Source:MGI Symbol;Acc:MGI:1858213]
ENSMUSG00000002661	297.737	1.29087	0.368343	0.204404	1.80203	0.0715405	0.315247	334.357	336.941	279.159	240.491	17	57304339	57306322	1	66400	protein_coding	Alkbh7	alkB homolog 7 [Source:MGI Symbol;Acc:MGI:1913650]
ENSMUSG00000002664	21.3586	-1.06036	-0.0845606	0.727698	-0.116203	0.907492	0.97965	15.0514	26.2795	15.8719	28.2315	17	57306457	57307018	-1	19197	protein_coding	Pspn	persephin [Source:MGI Symbol;Acc:MGI:1201684]
ENSMUSG00000002668	3275.31	-1.04118	-0.0582193	0.104216	-0.558639	0.576408	0.875838	3268.31	3149.79	3151.05	3532.08	17	57372905	57385514	-1	70785	protein_coding	Dennd1c	DENN/MADD domain containing 1C [Source:MGI Symbol;Acc:MGI:1918035]
ENSMUSG00000002679	1152.52	-1.05882	-0.0824581	0.124011	-0.664927	0.506097	0.841472	1083.7	1155.36	1215.6	1155.4	12	81620331	81641782	-1	69792	protein_coding	Med6	mediator complex subunit 6 [Source:MGI Symbol;Acc:MGI:1917042]
ENSMUSG00000002699	3630.27	-1.66107	-0.732114	0.128188	-5.71127	1.12139e-08	4.73464e-07	2653.35	2802.52	3960.52	5104.68	11	33996920	34042295	1	16822	protein_coding	Lcp2	lymphocyte cytosolic protein 2 [Source:MGI Symbol;Acc:MGI:1321402]
ENSMUSG00000002718	6948.43	-1.1947	-0.256645	0.0900033	-2.8515	0.0043513	0.0431005	6162.49	6501.37	7752.04	7377.83	2	166747960	166788309	1	110750	protein_coding	Cse1l	chromosome segregation 1-like (S. cerevisiae) [Source:MGI Symbol;Acc:MGI:1339951]
ENSMUSG00000002728	1641.8	1.01626	0.0232737	0.111346	0.209022	0.834431	0.963135	1615.88	1694.09	1655.35	1601.88	2	145744019	145758345	1	67877	protein_coding	Naa20	N(alpha)-acetyltransferase 20, NatB catalytic subunit [Source:MGI Symbol;Acc:MGI:1915127]
ENSMUSG00000002731	224.942	1.36812	0.452195	0.246569	1.83395	0.0666609	0.301686	262.325	257.164	159.653	220.624	2	76460242	76478359	-1	23992	protein_coding	Prkra	protein kinase, interferon inducible double stranded RNA dependent activator [Source:MGI Symbol;Acc:MGI:1344375]
ENSMUSG00000002732	33.8388	-1.07483	-0.104113	0.58013	-0.179465	0.857572	0.968779	25.8025	39.4193	42.9476	27.1859	2	76493388	76503460	-1	14231	protein_coding	Fkbp7	FK506 binding protein 7 [Source:MGI Symbol;Acc:MGI:1336879]
ENSMUSG00000002733	2082.33	1.0414	0.05853	0.103794	0.563904	0.572819	0.87519	2131.93	2117.38	2066.15	2013.85	2	76505625	76527172	1	83435	protein_coding	Plekha3	pleckstrin homology domain-containing, family A (phosphoinositide binding specific) member 3 [Source:MGI Symbol;Acc:MGI:1932515]
ENSMUSG00000002741	3323.18	-1.17718	-0.235339	0.0978691	-2.40463	0.0161889	0.115148	2945.78	3159.17	3607.6	3580.17	11	5905693	5917780	1	56418	protein_coding	Ykt6	YKT6 v-SNARE homolog (S. cerevisiae) [Source:MGI Symbol;Acc:MGI:1927550]
ENSMUSG00000002748	15172.2	-1.19209	-0.253489	0.0915529	-2.76877	0.00562687	0.0523991	13479.6	14206	17327.5	15675.8	5	135216118	135274983	1	22385	protein_coding	Baz1b	bromodomain adjacent to zinc finger domain, 1B [Source:MGI Symbol;Acc:MGI:1353499]
ENSMUSG00000002763	3118.79	1.163	0.217855	0.110004	1.98044	0.0476546	0.242216	3430.65	3276.49	2673.02	3095.01	17	47022389	47036467	1	224824	protein_coding	Pex6	peroxisomal biogenesis factor 6 [Source:MGI Symbol;Acc:MGI:2385054]
ENSMUSG00000002767	2315.23	1.03929	0.0555925	0.103219	0.538586	0.590172	0.883922	2402.86	2317.29	2321.97	2218.79	17	46957155	46961065	1	27398	protein_coding	Mrpl2	mitochondrial ribosomal protein L2 [Source:MGI Symbol;Acc:MGI:1351622]
ENSMUSG00000002768	1251.1	-1.19369	-0.255433	0.12211	-2.09182	0.0364545	0.204697	1132.08	1148.79	1301.5	1422.03	17	46989719	46994037	1	17256	protein_coding	Mea1	male enhanced antigen 1 [Source:MGI Symbol;Acc:MGI:96957]
ENSMUSG00000002769	73.0816	-1.2655	-0.339712	0.392788	-0.864873	0.387109	0.763943	63.4311	65.6988	95.2316	67.9647	17	47036590	47040094	-1	14711	protein_coding	Gnmt	glycine N-methyltransferase [Source:MGI Symbol;Acc:MGI:1202304]
ENSMUSG00000002771	5.79501	-1.03909	-0.0553243	1.33115	-0.0415614	0.966848		8.60082	2.81566	6.5355	5.22806	7	45481307	45527802	-1	14814	protein_coding	Grin2d	glutamate receptor, ionotropic, NMDA2D (epsilon 4) [Source:MGI Symbol;Acc:MGI:95823]
ENSMUSG00000002778	1885.28	1.01478	0.0211644	0.113634	0.18625	0.852249	0.967039	1940.56	1857.4	1771.12	1972.02	7	45522196	45533156	1	68137	protein_coding	Kdelr1	KDEL (Lys-Asp-Glu-Leu) endoplasmic reticulum protein retention receptor 1 [Source:MGI Symbol;Acc:MGI:1915387]
ENSMUSG00000002781	282.978	-1.13045	-0.176892	0.213903	-0.826972	0.408253	0.779318	290.278	241.209	285.695	314.729	7	45546365	45566837	1	70209	protein_coding	Tmem143	transmembrane protein 143 [Source:MGI Symbol;Acc:MGI:1917459]
ENSMUSG00000002791	13.4868	1.41311	0.498873	0.904134	0.551769	0.581107	0.878129	20.427	11.2627	14.9383	7.31928	17	32295057	32326324	-1	435518	transcribed_unprocessed_pseudogene	Pdxk-ps	pyridoxal (pyridoxine, vitamin B6) kinase, pseudogene [Source:MGI Symbol;Acc:MGI:1933201]
ENSMUSG00000002797	180.796	1.14788	0.198972	0.272244	0.730861	0.464864	0.818109	208.57	178.325	195.132	141.158	6	54959565	54969935	-1	110175	protein_coding	Ggct	gamma-glutamyl cyclotransferase [Source:MGI Symbol;Acc:MGI:95700]
ENSMUSG00000002799	2436.5	1.03858	0.0546153	0.46747	0.116831	0.906994	0.97965	2538.32	2427.1	3155.72	1624.88	12	112871439	112893396	-1	16450	protein_coding	Jag2	jagged 2 [Source:MGI Symbol;Acc:MGI:1098270]
ENSMUSG00000002803	36.968	-1.50579	-0.590516	0.570452	-1.03517	0.300589	0.692361	37.6286	21.5868	54.1513	34.5052	12	112940102	112942565	1	399566	protein_coding	Btbd6	BTB (POZ) domain containing 6 [Source:MGI Symbol;Acc:MGI:3026623]
ENSMUSG00000002804	298.74	1.05297	0.0744712	0.199569	0.37316	0.709029	0.92689	311.78	301.276	300.633	281.27	12	112897911	112905744	-1	66174	protein_coding	Nudt14	nudix (nucleoside diphosphate linked moiety X)-type motif 14 [Source:MGI Symbol;Acc:MGI:1913424]
ENSMUSG00000002808	34.9985	-1.25118	-0.323294	1.55051	-0.208507	0.834833	0.963238	23.6523	38.4807	4.66822	73.1928	13	19775876	19804097	-1	105298	protein_coding	Epdr1	ependymin related protein 1 (zebrafish) [Source:MGI Symbol;Acc:MGI:2145369]
ENSMUSG00000002812	9640.83	-1.10626	-0.14569	0.0887139	-1.64225	0.100538	0.386877	9102.9	9205.34	9725.76	10529.3	11	60604949	60618089	-1	14248	protein_coding	Flii	flightless I actin binding protein [Source:MGI Symbol;Acc:MGI:1342286]
ENSMUSG00000002814	1320.32	-1.32041	-0.400989	0.121186	-3.30886	0.000936777	0.0125075	1194.44	1082.15	1511.57	1493.13	11	60630884	60668191	-1	21975	protein_coding	Top3a	topoisomerase (DNA) III alpha [Source:MGI Symbol;Acc:MGI:1197527]
ENSMUSG00000002820	1187.26	-1.08979	-0.124049	0.140728	-0.881475	0.378061	0.756809	1166.49	1105.62	1108.23	1368.71	9	21176589	21189068	1	235040	protein_coding	Atg4d	autophagy related 4D, cysteine peptidase [Source:MGI Symbol;Acc:MGI:2444308]
ENSMUSG00000002825	1812.67	-1.01718	-0.0245816	0.114542	-0.214607	0.830074	0.962298	1782.52	1812.35	1932.64	1723.17	9	21323133	21331570	1	60507	protein_coding	Qtrt1	queuine tRNA-ribosyltransferase catalytic subunit 1 [Source:MGI Symbol;Acc:MGI:1931441]
ENSMUSG00000002833	5238.02	1.11505	0.157106	0.0883035	1.77916	0.0752136	0.326024	5550.76	5495.24	4961.38	4944.7	17	56386634	56407607	1	15193	protein_coding	Hdgfl2	HDGF like 2 [Source:MGI Symbol;Acc:MGI:1194492]
ENSMUSG00000002835	1973.81	-1.53257	-0.615956	0.114352	-5.38647	7.18554e-08	2.63144e-06	1543.85	1573.96	2536.71	2240.75	17	56347439	56379289	1	27221	protein_coding	Chaf1a	chromatin assembly factor 1, subunit A (p150) [Source:MGI Symbol;Acc:MGI:1351331]
ENSMUSG00000002844	2691.7	-1.07001	-0.0976194	0.12257	-0.796438	0.425777	0.791666	2639.38	2561.32	2490.96	3075.14	16	38264392	38273065	-1	11544	protein_coding	Adprh	ADP-ribosylarginine hydrolase [Source:MGI Symbol;Acc:MGI:1098234]
ENSMUSG00000002845	1650.25	-1.07285	-0.101452	0.113304	-0.895399	0.370574	0.750853	1547.07	1636.84	1656.28	1760.81	16	38379060	38412524	1	67846	protein_coding	Tmem39a	transmembrane protein 39a [Source:MGI Symbol;Acc:MGI:1915096]
ENSMUSG00000002846	1467.58	-1.00223	-0.00321021	0.113444	-0.0282978	0.977425	0.994405	1493.32	1438.8	1473.29	1464.9	16	38318709	38343025	-1	76916	protein_coding	Timmdc1	translocase of inner mitochondrial membrane domain containing 1 [Source:MGI Symbol;Acc:MGI:1922139]
ENSMUSG00000002847	27.1787	-3.27358	-1.71087	0.679201	-2.51894	0.0117708	0.0905431	16.1265	9.38555	29.8766	53.3262	16	38216479	38253507	-1	85031	protein_coding	Pla1a	phospholipase A1 member A [Source:MGI Symbol;Acc:MGI:1934677]
ENSMUSG00000002870	7240.6	1.20399	0.267825	0.0958799	2.79334	0.00521672	0.0497064	7712.79	8109.11	6920.17	6220.34	6	88860456	88875762	-1	17216	protein_coding	Mcm2	minichromosome maintenance complex component 2 [Source:MGI Symbol;Acc:MGI:105380]
ENSMUSG00000002871	1118.47	1.03654	0.0517699	0.143747	0.360147	0.718737	0.930573	1220.24	1056.81	1002.73	1194.09	6	88879233	88889220	1	24100	protein_coding	Tpra1	transmembrane protein, adipocyte asscociated 1 [Source:MGI Symbol;Acc:MGI:1345190]
ENSMUSG00000002881	2624.62	-1.25727	-0.330298	0.100212	-3.296	0.00098071	0.0129492	2313.62	2337	2853.21	2994.63	1	52496453	52539838	-1	17936	protein_coding	Nab1	Ngfi-A binding protein 1 [Source:MGI Symbol;Acc:MGI:107564]
ENSMUSG00000002885	848.176	-1.07447	-0.103624	0.142839	-0.72546	0.46817	0.819219	788.051	847.515	937.378	819.759	8	84449880	84467955	-1	26364	protein_coding	Adgre5	adhesion G protein-coupled receptor E5 [Source:MGI Symbol;Acc:MGI:1347095]
ENSMUSG00000002897	6516.98	-1.18033	-0.239188	0.0950951	-2.51525	0.0118948	0.0910429	5775.45	6179.44	6762.38	7350.65	6	120440208	120464520	1	16172	protein_coding	Il17ra	interleukin 17 receptor A [Source:MGI Symbol;Acc:MGI:107399]
ENSMUSG00000002900	2.98486	-2.89422	-1.53318	1.84301	-0.831886	0.405473		2.15021	0.938555	4.66822	4.18245	12	31315233	31379643	1	16777	protein_coding	Lamb1	laminin B1 [Source:MGI Symbol;Acc:MGI:96743]
ENSMUSG00000002908	2.48048	4.21847	2.07672	2.1803	0.952494	0.340847		4.30041	3.75422	1.86729	0	8	71294693	71315902	-1	84036	protein_coding	Kcnn1	potassium intermediate/small conductance calcium-activated channel, subfamily N, member 1 [Source:MGI Symbol;Acc:MGI:1933993]
ENSMUSG00000002944	1042.8	-1.36102	-0.444685	0.132274	-3.36186	0.000774187	0.0106343	843.956	922.599	1257.62	1147.04	5	17986688	18093799	-1	12491	protein_coding	Cd36	CD36 molecule [Source:MGI Symbol;Acc:MGI:107899]
ENSMUSG00000002948	1780.86	1.05657	0.0793951	0.108077	0.734612	0.462576	0.816774	1818	1841.44	1701.1	1762.9	8	4288740	4297897	1	26400	protein_coding	Map2k7	mitogen-activated protein kinase kinase 7 [Source:MGI Symbol;Acc:MGI:1346871]
ENSMUSG00000002949	4659.73	1.08838	0.122179	0.0909176	1.34385	0.178998	0.536993	4761.63	4951.81	4436.67	4488.81	8	4309731	4325913	-1	21856	protein_coding	Timm44	translocase of inner mitochondrial membrane 44 [Source:MGI Symbol;Acc:MGI:1343262]
ENSMUSG00000002957	3435.29	-1.0186	-0.0265823	0.102803	-0.258575	0.795963	0.955231	3431.73	3375.04	3270.55	3663.82	7	141142086	141212924	1	11772	protein_coding	Ap2a2	adaptor-related protein complex 2, alpha 2 subunit [Source:MGI Symbol;Acc:MGI:101920]
ENSMUSG00000002963	2657.59	-1.12091	-0.164666	0.113557	-1.45007	0.147039	0.479511	2586.7	2425.22	2603.93	3014.5	7	44506563	44512416	1	59047	protein_coding	Pnkp	polynucleotide kinase 3'- phosphatase [Source:MGI Symbol;Acc:MGI:1891698]
ENSMUSG00000002968	3088.91	1.02996	0.0425943	0.0984697	0.432563	0.665333	0.912083	3102.75	3165.74	2950.31	3136.83	7	44526189	44542136	-1	75613	protein_coding	Med25	mediator complex subunit 25 [Source:MGI Symbol;Acc:MGI:1922863]
ENSMUSG00000002981	5388.82	1.01144	0.0164071	0.112537	0.145792	0.884085	0.974864	5195.97	5641.65	4872.69	5844.97	7	19365496	19398958	-1	56457	protein_coding	Clptm1	cleft lip and palate associated transmembrane protein 1 [Source:MGI Symbol;Acc:MGI:1927155]
ENSMUSG00000002983	1563.82	-1.17368	-0.231042	0.111459	-2.07288	0.0381832	0.211092	1433.11	1444.44	1661.89	1715.85	7	19340142	19363363	-1	19698	protein_coding	Relb	avian reticuloendotheliosis viral (v-rel) oncogene related B [Source:MGI Symbol;Acc:MGI:103289]
ENSMUSG00000002984	3750.35	-1.03351	-0.0475508	0.0924227	-0.514492	0.606908	0.890464	3687.6	3689.46	3803.66	3820.66	7	19435238	19449363	-1	53333	protein_coding	Tomm40	translocase of outer mitochondrial membrane 40 [Source:MGI Symbol;Acc:MGI:1858259]
ENSMUSG00000002985	1134.42	1.01834	0.0262242	0.136539	0.192064	0.847692	0.966737	1113.81	1176.01	1222.14	1025.74	7	19430034	19433113	-1	11816	protein_coding	Apoe	apolipoprotein E [Source:MGI Symbol;Acc:MGI:88057]
ENSMUSG00000002996	1091.06	-1.07901	-0.109705	0.134231	-0.817281	0.413768	0.784069	1010.6	1088.72	1210.94	1053.98	12	31976253	32000534	-1	73389	protein_coding	Hbp1	high mobility group box transcription factor 1 [Source:MGI Symbol;Acc:MGI:894659]
ENSMUSG00000002997	624.843	1.42806	0.51406	0.167151	3.07542	0.00210209	0.0239167	808.478	661.681	485.495	543.718	12	32008475	32111295	-1	19088	protein_coding	Prkar2b	protein kinase, cAMP dependent regulatory, type II beta [Source:MGI Symbol;Acc:MGI:97760]
ENSMUSG00000003031	2917.8	1.03583	0.0507855	0.297842	0.170511	0.864608	0.970491	3176.93	2761.23	2310.77	3422.29	6	134897364	134902476	1	12576	protein_coding	Cdkn1b	cyclin-dependent kinase inhibitor 1B [Source:MGI Symbol;Acc:MGI:104565]
ENSMUSG00000003033	4979.48	1.01291	0.0185012	0.0991151	0.186664	0.851924	0.967039	5034.71	4987.48	4655.15	5240.61	8	72993862	73011229	1	11767	protein_coding	Ap1m1	adaptor-related protein complex AP-1, mu subunit 1 [Source:MGI Symbol;Acc:MGI:102776]
ENSMUSG00000003037	8603.82	1.06958	0.0970453	0.088504	1.09651	0.272857	0.662718	8592.22	9193.14	8200.19	8429.72	8	72915044	72937748	1	17274	protein_coding	Rab8a	RAB8A, member RAS oncogene family [Source:MGI Symbol;Acc:MGI:96960]
ENSMUSG00000003038	489.738	-1.90284	-0.928154	0.209599	-4.42824	9.50072e-06	0.000244575	335.432	339.757	769.322	514.441	4	133692049	133695961	-1	15331	protein_coding	Hmgn2	high mobility group nucleosomal binding domain 2 [Source:MGI Symbol;Acc:MGI:96136]
ENSMUSG00000003039	2861.89	1.02421	0.0345109	0.101799	0.339009	0.734603	0.934777	2783.44	3008.07	2778.52	2877.52	8	72973574	72978262	1	67922	protein_coding	Fam32a	family with sequence similarity 32, member A [Source:MGI Symbol;Acc:MGI:1915172]
ENSMUSG00000003062	696.331	-1.04389	-0.0619689	0.171704	-0.360904	0.718171	0.930573	706.343	656.05	611.537	811.395	13	19541846	19579965	-1	76205	protein_coding	Stard3nl	STARD3 N-terminal like [Source:MGI Symbol;Acc:MGI:1923455]
ENSMUSG00000003068	4936.47	-1.0767	-0.106615	0.0940283	-1.13386	0.256855	0.644186	4662.72	4844.82	4937.11	5301.25	10	79951637	79966516	1	20869	protein_coding	Stk11	serine/threonine kinase 11 [Source:MGI Symbol;Acc:MGI:1341870]
ENSMUSG00000003070	12.9745	1.25833	0.331512	0.890577	0.372244	0.709711	0.927341	12.9012	15.9554	8.40279	14.6386	10	80015316	80025844	1	13637	protein_coding	Efna2	ephrin A2 [Source:MGI Symbol;Acc:MGI:102707]
ENSMUSG00000003072	4972.76	1.09836	0.135357	0.106016	1.27676	0.201687	0.57379	5265.85	5145.16	4363.85	5116.18	10	79974466	79981652	1	66043	protein_coding	Atp5d	ATP synthase, H+ transporting, mitochondrial F1 complex, delta subunit [Source:MGI Symbol;Acc:MGI:1913293]
ENSMUSG00000003099	5283.9	1.36481	0.448705	0.385234	1.16476	0.244116	0.628022	5910.92	6287.38	5741.91	3195.39	7	16738565	16761849	-1	19060	protein_coding	Ppp5c	protein phosphatase 5, catalytic subunit [Source:MGI Symbol;Acc:MGI:102666]
ENSMUSG00000003119	3426.07	-1.18824	-0.248827	0.103617	-2.4014	0.0163323	0.115665	2972.66	3289.63	3841.94	3600.04	11	98093885	98169330	1	69131	protein_coding	Cdk12	cyclin-dependent kinase 12 [Source:MGI Symbol;Acc:MGI:1098802]
ENSMUSG00000003123	1377.56	1.25836	0.33155	0.125663	2.63841	0.00832956	0.0702922	1582.55	1488.55	1301.5	1137.63	7	25078952	25098135	-1	16890	protein_coding	Lipe	lipase, hormone sensitive [Source:MGI Symbol;Acc:MGI:96790]
ENSMUSG00000003131	4358.01	-1.02473	-0.0352378	0.0965274	-0.365055	0.71507	0.929317	4153.12	4456.26	4535.64	4287.01	9	45874157	45923988	-1	18475	protein_coding	Pafah1b2	platelet-activating factor acetylhydrolase, isoform 1b, subunit 2 [Source:MGI Symbol;Acc:MGI:108415]
ENSMUSG00000003134	9.57169	-2.24392	-1.16602	1.19386	-0.976686	0.328725	0.72019	4.30041	7.50844	23.3411	3.13683	1	39410573	39517836	-1	54610	protein_coding	Tbc1d8	TBC1 domain family, member 8 [Source:MGI Symbol;Acc:MGI:1927225]
ENSMUSG00000003135	2006.5	-1.12892	-0.174937	0.105837	-1.65289	0.0983527	0.382637	1842.73	1926.85	2103.5	2152.91	1	39574073	39585970	1	52846	protein_coding	Cnot11	CCR4-NOT transcription complex, subunit 11 [Source:MGI Symbol;Acc:MGI:106580]
ENSMUSG00000003153	4261.54	-1.26102	-0.334596	0.0959486	-3.48724	0.00048803	0.00721638	3927.35	3612.5	4755.05	4751.26	6	122704768	122778599	-1	20527	protein_coding	Slc2a3	solute carrier family 2 (facilitated glucose transporter), member 3 [Source:MGI Symbol;Acc:MGI:95757]
ENSMUSG00000003154	1532.68	-1.07426	-0.103349	0.114002	-0.906554	0.364643	0.747405	1468.59	1486.67	1534.91	1640.56	6	122796873	122822325	1	60611	protein_coding	Foxj2	forkhead box J2 [Source:MGI Symbol;Acc:MGI:1926805]
ENSMUSG00000003161	2937.79	-1.06091	-0.0853011	0.103437	-0.824664	0.409563	0.780257	2788.82	2912.33	2884.96	3165.07	5	8096078	8119379	1	109552	protein_coding	Sri	sorcin [Source:MGI Symbol;Acc:MGI:98419]
ENSMUSG00000003166	1609.12	1.06833	0.0953614	0.112313	0.849071	0.395842	0.771156	1619.11	1705.35	1584.39	1527.64	16	17657346	17716426	-1	13356	protein_coding	Dgcr2	DiGeorge syndrome critical region gene 2 [Source:MGI Symbol;Acc:MGI:892866]
ENSMUSG00000003184	2982.56	1.07614	0.105864	0.119101	0.888862	0.374077	0.75432	3132.85	3050.3	2586.19	3160.88	7	44647072	44652272	1	54131	protein_coding	Irf3	interferon regulatory factor 3 [Source:MGI Symbol;Acc:MGI:1859179]
ENSMUSG00000003190	314.041	1.15846	0.212205	0.201987	1.05058	0.29345	0.683547	352.634	321.924	311.837	269.768	7	44640646	44648136	-1	75736	protein_coding	Bcl2l12	BCL2-like 12 (proline rich) [Source:MGI Symbol;Acc:MGI:1922986]
ENSMUSG00000003198	481.979	-1.03909	-0.0553262	0.165381	-0.334538	0.737973	0.935803	492.397	453.322	493.897	488.301	17	56199093	56205928	1	224893	protein_coding	Zfp959	zinc finger protein 959 [Source:MGI Symbol;Acc:MGI:2385058]
ENSMUSG00000003199	2428.62	1.12614	0.171389	0.102418	1.67343	0.0942426	0.372212	2625.4	2520.02	2234.21	2334.85	17	56312711	56323790	1	68047	protein_coding	Mpnd	MPN domain containing [Source:MGI Symbol;Acc:MGI:1915297]
ENSMUSG00000003200	2065.56	1.01592	0.0227878	0.109241	0.208601	0.83476	0.963238	2074.95	2088.28	1951.32	2147.69	17	56323750	56343635	-1	20405	protein_coding	Sh3gl1	SH3-domain GRB2-like 1 [Source:MGI Symbol;Acc:MGI:700010]
ENSMUSG00000003206	128.147	-1.39945	-0.484856	0.297224	-1.63128	0.102832	0.391756	116.111	97.6097	140.98	157.887	17	56259640	56264022	1	50498	protein_coding	Ebi3	Epstein-Barr virus induced gene 3 [Source:MGI Symbol;Acc:MGI:1354171]
ENSMUSG00000003208	734.476	-1.06819	-0.0951709	0.139632	-0.681585	0.495501	0.835873	705.268	715.179	756.251	761.205	17	56266099	56275285	1	72886	protein_coding	Yju2	YJU2 splicing factor [Source:MGI Symbol;Acc:MGI:1920136]
ENSMUSG00000003226	14023.1	-1.03664	-0.0519186	0.0951105	-0.545877	0.585151	0.8811	13390.4	14151.5	15135.3	13415.2	10	58282742	58330178	1	19386	protein_coding	Ranbp2	RAN binding protein 2 [Source:MGI Symbol;Acc:MGI:894323]
ENSMUSG00000003228	1069.13	1.20623	0.270509	0.125659	2.15273	0.0313401	0.183315	1151.44	1186.33	940.179	998.559	19	60878187	61084406	1	14773	protein_coding	Grk5	G protein-coupled receptor kinase 5 [Source:MGI Symbol;Acc:MGI:109161]
ENSMUSG00000003233	1736.49	1.02136	0.0304923	0.109306	0.278964	0.780273	0.949532	1756.72	1753.22	1759.92	1676.12	16	20335732	20352760	1	13544	protein_coding	Dvl3	dishevelled segment polarity protein 3 [Source:MGI Symbol;Acc:MGI:108100]
ENSMUSG00000003234	2805.36	1.01828	0.0261406	0.110476	0.236617	0.812954	0.958785	2727.54	2932.98	2603.93	2956.99	16	20367327	20380129	1	27406	protein_coding	Abcf3	ATP-binding cassette, sub-family F (GCN20), member 3 [Source:MGI Symbol;Acc:MGI:1351656]
ENSMUSG00000003235	7861.94	1.12677	0.172198	0.088439	1.94709	0.0515243	0.254997	8285.82	8374.72	7147.98	7639.24	16	20317567	20328073	1	224045	protein_coding	Eif2b5	eukaryotic translation initiation factor 2B, subunit 5 epsilon [Source:MGI Symbol;Acc:MGI:2446176]
ENSMUSG00000003269	1596.94	-1.08015	-0.111226	0.114238	-0.973631	0.33024	0.720646	1523.42	1547.68	1726.31	1590.38	7	45456061	45464005	-1	19158	protein_coding	Cyth2	cytohesin 2 [Source:MGI Symbol;Acc:MGI:1334255]
ENSMUSG00000003271	7.8592	-2.48217	-1.3116	1.2167	-1.078	0.281035		4.30041	4.69277	4.66822	17.7754	7	45379407	45434093	-1	54200	protein_coding	Sult2b1	sulfotransferase family, cytosolic, 2B, member 1 [Source:MGI Symbol;Acc:MGI:1926342]
ENSMUSG00000003271	7.8592	-2.48217	-1.3116	1.2167	-1.078	0.281035		4.30041	4.69277	4.66822	17.7754	7	45379407	45434093	-1	545963	protein_coding	Sult2b1	sulfotransferase family, cytosolic, 2B, member 1 [Source:MGI Symbol;Acc:MGI:1926342]
ENSMUSG00000003273	2.51462	4.28094	2.09793	2.18208	0.961435	0.336333		5.37552	2.81566	1.86729	0	7	45349267	45354106	1	12348	protein_coding	Car11	carbonic anhydrase 11 [Source:MGI Symbol;Acc:MGI:1336193]
ENSMUSG00000003279	2.39378	-2.363	-1.24062	2.18914	-0.566715	0.570908		0	2.81566	4.66822	2.09122	17	70276068	71128408	1	224997	protein_coding	Dlgap1	DLG associated protein 1 [Source:MGI Symbol;Acc:MGI:1346065]
ENSMUSG00000003282	77.4146	-1.01102	-0.0158079	0.399236	-0.0395955	0.968416	0.991341	91.3838	62.8832	90.5634	64.8279	4	3900996	3938423	-1	56711	protein_coding	Plag1	pleiomorphic adenoma gene 1 [Source:MGI Symbol;Acc:MGI:1891916]
ENSMUSG00000003283	1937.6	1.23399	0.30333	0.163829	1.8515	0.0640973	0.295277	2221.16	2059.19	1397.66	2072.4	2	152950388	152993361	1	15162	protein_coding	Hck	hemopoietic cell kinase [Source:MGI Symbol;Acc:MGI:96052]
ENSMUSG00000003299	2305.58	-1.00353	-0.00508078	0.11146	-0.045584	0.963642	0.99133	2311.47	2291.01	2159.52	2460.32	9	20914034	20920135	1	66163	protein_coding	Mrpl4	mitochondrial ribosomal protein L4 [Source:MGI Symbol;Acc:MGI:2137210]
ENSMUSG00000003308	1868.45	1.09005	0.124396	0.12232	1.01697	0.309169	0.700576	2054.52	1843.32	1665.62	1910.33	9	21141026	21150657	-1	50868	protein_coding	Keap1	kelch-like ECH-associated protein 1 [Source:MGI Symbol;Acc:MGI:1858732]
ENSMUSG00000003309	268.825	1.11417	0.155967	0.21695	0.718909	0.472197	0.821975	310.705	256.225	251.15	257.22	9	21205571	21223633	-1	11768	protein_coding	Ap1m2	adaptor protein complex AP-1, mu 2 subunit [Source:MGI Symbol;Acc:MGI:1336974]
ENSMUSG00000003316	5161.46	-1.03128	-0.0444425	0.0898387	-0.494693	0.620817	0.896826	5054.06	5109.49	5135.04	5347.26	8	111881053	111985848	-1	20340	protein_coding	Glg1	golgi apparatus protein 1 [Source:MGI Symbol;Acc:MGI:104967]
ENSMUSG00000003341	32.1276	-1.18243	-0.241754	0.573355	-0.421647	0.673282	0.914336	26.8776	31.9109	28.943	40.7788	10	80355418	80374958	-1	67331	protein_coding	Atp8b3	ATPase, class I, type 8B, member 3 [Source:MGI Symbol;Acc:MGI:1914581]
ENSMUSG00000003344	1105.39	1.4373	0.523366	0.141462	3.6997	0.000215853	0.00368677	1429.89	1177.89	874.824	938.959	10	80478451	80492905	-1	208198	protein_coding	Btbd2	BTB (POZ) domain containing 2 [Source:MGI Symbol;Acc:MGI:1933831]
ENSMUSG00000003345	4227.47	1.09622	0.132536	0.0994139	1.33318	0.182474	0.543209	4573.49	4269.48	3862.48	4204.4	10	80458672	80476583	1	103236	protein_coding	Csnk1g2	casein kinase 1, gamma 2 [Source:MGI Symbol;Acc:MGI:1920014]
ENSMUSG00000003346	2008.32	1.06706	0.0936361	0.116345	0.804812	0.420928	0.788373	2152.36	1994.43	1822.47	2064.04	10	80419488	80426175	-1	216169	protein_coding	Abhd17a	abhydrolase domain containing 17A [Source:MGI Symbol;Acc:MGI:106388]
ENSMUSG00000003348	5590.68	1.14488	0.1952	0.101837	1.91679	0.055264	0.267952	5785.13	6150.35	4879.22	5548.01	10	80521087	80537811	-1	208228	protein_coding	Mob3a	MOB kinase activator 3A [Source:MGI Symbol;Acc:MGI:3050117]
ENSMUSG00000003352	72.2397	1.18408	0.243766	0.428863	0.568402	0.569762	0.873847	87.0834	69.453	46.6822	85.7401	15	98528721	98542410	1	12297	protein_coding	Cacnb3	calcium channel, voltage-dependent, beta 3 subunit [Source:MGI Symbol;Acc:MGI:103307]
ENSMUSG00000003355	350.956	1.01957	0.0279577	0.202779	0.137873	0.890341	0.976044	334.357	374.483	386.528	308.455	15	98622247	98626079	-1	66120	protein_coding	Fkbp11	FK506 binding protein 11 [Source:MGI Symbol;Acc:MGI:1913370]
ENSMUSG00000003360	7577.04	-1.03461	-0.0490937	0.0859426	-0.571238	0.567838	0.87315	7492.39	7404.26	7836.07	7575.46	15	98543015	98560775	-1	74351	protein_coding	Ddx23	DEAD box helicase 23 [Source:MGI Symbol;Acc:MGI:1921601]
ENSMUSG00000003363	969.094	-1.14696	-0.197809	0.131583	-1.5033	0.132762	0.452758	912.763	892.565	987.795	1083.25	7	27231425	27252643	-1	18807	protein_coding	Pld3	phospholipase D family, member 3 [Source:MGI Symbol;Acc:MGI:1333782]
ENSMUSG00000003378	564.354	1.33801	0.420092	0.155906	2.69452	0.00704898	0.061924	663.339	628.832	495.765	469.48	7	24709274	24771771	-1	14809	protein_coding	Grik5	glutamate receptor, ionotropic, kainate 5 (gamma 2) [Source:MGI Symbol;Acc:MGI:95818]
ENSMUSG00000003379	21689.5	1.37278	0.457105	0.0798525	5.72438	1.03815e-08	4.40921e-07	24881.1	25312.8	18249	18314.9	7	24596806	24601622	1	12518	protein_coding	Cd79a	CD79A antigen (immunoglobulin-associated alpha) [Source:MGI Symbol;Acc:MGI:101774]
ENSMUSG00000003380	3759.8	1.0371	0.0525549	0.113317	0.463787	0.642801	0.905735	3887.57	3768.3	3354.58	4028.74	7	24669177	24672179	-1	14470	protein_coding	Rabac1	Rab acceptor 1 (prenylated) [Source:MGI Symbol;Acc:MGI:1201692]
ENSMUSG00000003382	2431.8	-1.11987	-0.163331	0.100903	-1.61869	0.105515	0.397863	2337.27	2251.59	2570.32	2568.02	3	87432714	87447463	1	27049	protein_coding	Etv3	ets variant 3 [Source:MGI Symbol;Acc:MGI:1350926]
ENSMUSG00000003402	4614.54	-1.07171	-0.0999212	0.0927722	-1.07706	0.281454	0.671184	4459.53	4449.69	4626.2	4922.74	9	21914102	21925518	1	19089	protein_coding	Prkcsh	protein kinase C substrate 80K-H [Source:MGI Symbol;Acc:MGI:107877]
ENSMUSG00000003410	14.5946	-1.94925	-0.962917	0.846618	-1.13737	0.255384	0.642522	7.52572	12.2012	17.7392	20.9122	9	21926301	21963319	-1	15571	protein_coding	Elavl3	ELAV like RNA binding protein 3 [Source:MGI Symbol;Acc:MGI:109157]
ENSMUSG00000003411	6.03921	-1.01471	-0.0210692	1.31438	-0.0160298	0.987211		5.37552	6.56988	2.80093	9.4105	4	108736260	108800521	1	69908	protein_coding	Rab3b	RAB3B, member RAS oncogene family [Source:MGI Symbol;Acc:MGI:1917158]
ENSMUSG00000003420	16.7678	1.03035	0.0431398	0.792353	0.0544452	0.95658	0.990759	17.2016	16.894	21.4738	11.5017	7	44742414	44753275	-1	14132	protein_coding	Fcgrt	Fc fragment of IgG receptor and transporter [Source:MGI Symbol;Acc:MGI:103017]
ENSMUSG00000003421	2634.46	-1.04037	-0.0570942	0.109483	-0.521487	0.602027	0.888423	2641.53	2522.83	2518.97	2854.52	7	44711853	44727634	1	66394	protein_coding	Nosip	nitric oxide synthase interacting protein [Source:MGI Symbol;Acc:MGI:1913644]
ENSMUSG00000003423	1097.82	-1.29598	-0.374039	0.139743	-2.67662	0.00743699	0.0642787	915.988	995.806	1130.64	1348.84	7	44803727	44809489	1	68845	protein_coding	Pih1d1	PIH1 domain containing 1 [Source:MGI Symbol;Acc:MGI:1916095]
ENSMUSG00000003429	13310.7	1.05443	0.076457	0.0918474	0.832435	0.405164	0.77736	13973.1	13354.7	13621.9	12293.3	7	44771803	44773863	-1	27207	protein_coding	Rps11	ribosomal protein S11 [Source:MGI Symbol;Acc:MGI:1351329]
ENSMUSG00000003435	9274.42	-1.03661	-0.0518711	0.0927165	-0.559459	0.575849	0.875793	8830.9	9384.61	9856.47	9025.72	7	28014316	28038171	-1	20924	protein_coding	Supt5	suppressor of Ty 5, DSIF elongation factor subunit [Source:MGI Symbol;Acc:MGI:1202400]
ENSMUSG00000003436	8.29302	1.40405	0.489593	1.15132	0.425244	0.670659		4.30041	15.0169	6.5355	7.31928	7	27992978	28001663	-1	13389	protein_coding	Dll3	delta like canonical Notch ligand 3 [Source:MGI Symbol;Acc:MGI:1096877]
ENSMUSG00000003437	3297.34	-1.16922	-0.225541	0.107221	-2.10352	0.0354199	0.200223	2944.71	3135.71	3776.59	3332.36	7	28092376	28098813	1	54624	protein_coding	Paf1	Paf1, RNA polymerase II complex component [Source:MGI Symbol;Acc:MGI:1923988]
ENSMUSG00000003438	4831.96	1.06624	0.0925332	0.101722	0.909663	0.363	0.746068	4814.31	5158.3	4410.53	4944.7	7	28004941	28011497	-1	66525	protein_coding	Timm50	translocase of inner mitochondrial membrane 50 [Source:MGI Symbol;Acc:MGI:1913775]
ENSMUSG00000003444	427.077	-1.12278	-0.167078	0.176033	-0.949127	0.342556	0.731246	408.539	396.07	424.808	478.89	7	28085571	28092133	-1	67224	protein_coding	Med29	mediator complex subunit 29 [Source:MGI Symbol;Acc:MGI:1914474]
ENSMUSG00000003452	934.786	1.13468	0.182281	0.13315	1.36899	0.171003	0.522899	974.043	1013.64	914.971	836.489	6	149310384	149464827	1	12121	protein_coding	Bicd1	BICD cargo adaptor 1 [Source:MGI Symbol;Acc:MGI:1101760]
ENSMUSG00000003458	2896.05	-1.0134	-0.0191985	0.0983993	-0.195108	0.845308	0.966337	2813.54	2939.55	2879.36	2951.76	1	171893580	171910362	-1	59287	protein_coding	Ncstn	nicastrin [Source:MGI Symbol;Acc:MGI:1891700]
ENSMUSG00000003464	2209.3	-1.36812	-0.452193	0.102633	-4.40591	1.05342e-05	0.000268763	1877.13	1854.58	2521.77	2583.71	1	171954322	171964060	1	19298	protein_coding	Pex19	peroxisomal biogenesis factor 19 [Source:MGI Symbol;Acc:MGI:1334458]
ENSMUSG00000003469	6.70189	1.71261	0.776199	1.20989	0.641547	0.521167		7.52572	9.38555	4.66822	5.22806	14	70694916	70706272	1	105653	protein_coding	Phyhip	phytanoyl-CoA hydroxylase interacting protein [Source:MGI Symbol;Acc:MGI:1860417]
ENSMUSG00000003484	9176.34	1.02273	0.0324254	0.1146	0.282943	0.77722	0.948946	9272.76	9285.12	8048.94	10098.5	8	72742326	72763470	-1	72054	protein_coding	Cyp4f18	cytochrome P450, family 4, subfamily f, polypeptide 18 [Source:MGI Symbol;Acc:MGI:1919304]
ENSMUSG00000003500	4165.28	-1.07528	-0.104717	0.10841	-0.965934	0.334077	0.724533	4112.27	3915.65	3979.19	4654.02	6	29200433	29216363	-1	23917	protein_coding	Impdh1	inosine monophosphate dehydrogenase 1 [Source:MGI Symbol;Acc:MGI:96567]
ENSMUSG00000003518	2897.15	-1.26999	-0.344816	0.0983994	-3.50425	0.000457901	0.00681991	2503.92	2600.73	3190.26	3293.68	11	101861969	101877839	-1	72349	protein_coding	Dusp3	dual specificity phosphatase 3 (vaccinia virus phosphatase VH1-related) [Source:MGI Symbol;Acc:MGI:1919599]
ENSMUSG00000003527	2005.12	1.00871	0.0125086	0.106235	0.117744	0.90627	0.97965	1994.32	2032.91	1943.85	2049.4	16	17718573	17729212	-1	27886	protein_coding	Ess2	ess-2 splicing factor [Source:MGI Symbol;Acc:MGI:107854]
ENSMUSG00000003528	5703.51	1.51029	0.594823	0.116674	5.09814	3.43004e-07	1.14706e-05	7218.24	6507	4094.96	4993.84	16	17743087	17746083	-1	13358	protein_coding	Slc25a1	solute carrier family 25 (mitochondrial carrier, citrate transporter), member 1 [Source:MGI Symbol;Acc:MGI:1345283]
ENSMUSG00000003534	46.8291	1.05998	0.0840306	0.466791	0.180018	0.857139	0.968595	49.4547	46.9277	43.8812	47.0525	17	35992459	36015513	-1	12305	protein_coding	Ddr1	discoidin domain receptor family, member 1 [Source:MGI Symbol;Acc:MGI:99216]
ENSMUSG00000003541	908.579	-1.63849	-0.71237	0.642815	-1.1082	0.267774	0.657147	742.896	634.463	632.077	1624.88	17	36132576	36133815	1	15937	protein_coding	Ier3	immediate early response 3 [Source:MGI Symbol;Acc:MGI:104814]
ENSMUSG00000003545	269.756	1.34878	0.431652	0.714977	0.603728	0.546025	0.864352	170.941	448.629	275.425	184.028	7	19036621	19043976	-1	14282	protein_coding	Fosb	FBJ osteosarcoma oncogene B [Source:MGI Symbol;Acc:MGI:95575]
ENSMUSG00000003546	830.133	1.08038	0.111535	0.142451	0.78297	0.433645	0.796964	921.363	803.403	783.327	812.44	17	46941550	46956948	-1	74764	protein_coding	Klc4	kinesin light chain 4 [Source:MGI Symbol;Acc:MGI:1922014]
ENSMUSG00000003549	786.821	-1.13781	-0.186258	0.137225	-1.35732	0.174681	0.529272	751.497	720.81	829.075	845.9	7	19078703	19090449	1	13870	protein_coding	Ercc1	excision repair cross-complementing rodent repair deficiency, complementation group 1 [Source:MGI Symbol;Acc:MGI:95412]
ENSMUSG00000003573	480.231	1.06622	0.0925006	0.164621	0.561901	0.574184	0.875614	503.148	488.048	451.883	477.844	8	70735477	70747011	1	26558	protein_coding	Homer3	homer scaffolding protein 3 [Source:MGI Symbol;Acc:MGI:1347359]
ENSMUSG00000003575	966.133	1.0862	0.119294	0.127411	0.936299	0.349119	0.735927	1011.67	1000.5	928.042	924.321	8	70835005	70892229	-1	382056	protein_coding	Crtc1	CREB regulated transcription coactivator 1 [Source:MGI Symbol;Acc:MGI:2142523]
ENSMUSG00000003581	777.448	1.14504	0.195401	0.139426	1.40147	0.161073	0.505691	847.181	812.788	701.166	748.658	11	4085202	4091172	1	71673	protein_coding	Rnf215	ring finger protein 215 [Source:MGI Symbol;Acc:MGI:1918923]
ENSMUSG00000003585	126.308	-1.21728	-0.283659	0.295869	-0.958733	0.337694	0.727704	116.111	111.688	127.909	149.522	11	4047039	4073415	-1	67815	protein_coding	Sec14l2	SEC14-like lipid binding 2 [Source:MGI Symbol;Acc:MGI:1915065]
ENSMUSG00000003604	971.065	-1.13534	-0.18313	0.12844	-1.4258	0.153925	0.492871	885.885	932.923	1034.48	1030.97	2	112323309	112464918	1	74268	protein_coding	Aven	apoptosis, caspase activation inhibitor [Source:MGI Symbol;Acc:MGI:1921518]
ENSMUSG00000003617	22.5301	-3.48174	-1.79981	0.700124	-2.5707	0.0101494	0.0812918	10.751	9.38555	35.4785	34.5052	3	20011218	20063309	1	12870	protein_coding	Cp	ceruloplasmin [Source:MGI Symbol;Acc:MGI:88476]
ENSMUSG00000003623	926.73	1.02173	0.031015	0.140782	0.220306	0.825633	0.960755	966.518	906.644	847.748	986.012	5	9016033	9047324	-1	74114	protein_coding	Crot	carnitine O-octanoyltransferase [Source:MGI Symbol;Acc:MGI:1921364]
ENSMUSG00000003644	10518.9	-1.04823	-0.0679581	0.096778	-0.702206	0.482551	0.828678	10311.3	10230.2	10039.5	11494.4	4	133574601	133615108	-1	20111	protein_coding	Rps6ka1	ribosomal protein S6 kinase polypeptide 1 [Source:MGI Symbol;Acc:MGI:104558]
ENSMUSG00000003660	12792.7	-1.05748	-0.0806236	0.082094	-0.982089	0.326056	0.716832	12286.3	12584.1	13173.7	13126.6	2	127050306	127082371	1	320632	protein_coding	Snrnp200	small nuclear ribonucleoprotein 200 (U5) [Source:MGI Symbol;Acc:MGI:2444401]
ENSMUSG00000003662	2357.78	-1.11739	-0.160138	0.101692	-1.57473	0.115318	0.417822	2183.53	2270.36	2501.23	2476.01	2	127082858	127089736	-1	26371	protein_coding	Ciao1	cytosolic iron-sulfur protein assembly 1 [Source:MGI Symbol;Acc:MGI:1346998]
ENSMUSG00000003680	1121.18	-1.09051	-0.125009	0.126933	-0.984842	0.324702	0.715526	1035.32	1109.37	1125.04	1215	19	8751851	8763781	-1	225895	protein_coding	Taf6l	TATA-box binding protein associated factor 6 like [Source:MGI Symbol;Acc:MGI:2444957]
ENSMUSG00000003680	1121.18	-1.09051	-0.125009	0.126933	-0.984842	0.324702	0.715526	1035.32	1109.37	1125.04	1215	19	8751851	8763781	-1	100039957	protein_coding	Taf6l	TATA-box binding protein associated factor 6 like [Source:MGI Symbol;Acc:MGI:2444957]
ENSMUSG00000003721	1188.85	-1.08673	-0.12	0.157417	-0.762304	0.445879	0.805384	1218.09	1060.57	1066.22	1410.53	1	121232082	121260318	-1	72999	protein_coding	Insig2	insulin induced gene 2 [Source:MGI Symbol;Acc:MGI:1920249]
ENSMUSG00000003731	3635.27	-1.03119	-0.044316	0.0940408	-0.471242	0.637468	0.904529	3511.29	3647.22	3674.82	3707.74	4	129537773	129566560	-1	16650	protein_coding	Kpna6	karyopherin (importin) alpha 6 [Source:MGI Symbol;Acc:MGI:1100836]
ENSMUSG00000003746	3423.36	-1.07978	-0.110733	0.133317	-0.830602	0.406199	0.777991	3154.35	3428.54	3074.49	4036.06	10	53780881	53952705	-1	17155	protein_coding	Man1a	mannosidase 1, alpha [Source:MGI Symbol;Acc:MGI:104677]
ENSMUSG00000003752	321.26	-1.19419	-0.256033	0.20491	-1.24949	0.211487	0.585611	293.503	291.89	312.771	386.876	7	26906597	26928086	-1	233011	protein_coding	Itpkc	inositol 1,4,5-trisphosphate 3-kinase C [Source:MGI Symbol;Acc:MGI:2442554]
ENSMUSG00000003762	495.971	-1.01645	-0.0235326	0.168389	-0.139752	0.888856	0.975778	503.148	480.54	465.888	534.307	7	26932448	26957375	1	76889	protein_coding	Coq8b	coenzyme Q8B [Source:MGI Symbol;Acc:MGI:1924139]
ENSMUSG00000003778	5157.23	-1.16435	-0.21953	0.104267	-2.10545	0.0352525	0.199671	4705.73	4826.05	5963.18	5133.95	18	34731668	34757654	-1	78656	protein_coding	Brd8	bromodomain containing 8 [Source:MGI Symbol;Acc:MGI:1925906]
ENSMUSG00000003779	1647.48	-4.69752	-2.2319	0.152034	-14.6803	8.6207e-49	1.76269e-46	495.623	659.804	2934.44	2500.06	18	34757666	34766330	1	19348	protein_coding	Kif20a	kinesin family member 20A [Source:MGI Symbol;Acc:MGI:1201682]
ENSMUSG00000003808	5396.23	-1.03553	-0.0503698	0.0934283	-0.539128	0.589798	0.883686	5243.28	5360.09	5270.42	5711.13	8	85583618	85595886	1	66590	protein_coding	Farsa	phenylalanyl-tRNA synthetase, alpha subunit [Source:MGI Symbol;Acc:MGI:1913840]
ENSMUSG00000003809	680.165	1.24792	0.31953	0.144273	2.21477	0.0267761	0.163571	764.398	746.151	616.205	593.907	8	85613022	85620550	-1	270076	protein_coding	Gcdh	glutaryl-Coenzyme A dehydrogenase [Source:MGI Symbol;Acc:MGI:104541]
ENSMUSG00000003810	2055.42	1.08182	0.113463	0.106151	1.06888	0.285122	0.675542	2188.91	2083.59	1936.38	2012.8	4	116163959	116321380	-1	17776	protein_coding	Mast2	microtubule associated serine/threonine kinase 2 [Source:MGI Symbol;Acc:MGI:894676]
ENSMUSG00000003812	720.573	1.05989	0.0839101	0.150501	0.557537	0.57716	0.876116	759.023	724.564	752.517	646.188	8	85635189	85649544	1	13423	protein_coding	Dnase2a	deoxyribonuclease II alpha [Source:MGI Symbol;Acc:MGI:1329019]
ENSMUSG00000003812	720.573	1.05989	0.0839101	0.150501	0.557537	0.57716	0.876116	759.023	724.564	752.517	646.188	8	85635189	85649544	1	100503676	protein_coding	Dnase2a	deoxyribonuclease II alpha [Source:MGI Symbol;Acc:MGI:1329019]
ENSMUSG00000003813	2850.56	1.10946	0.149853	0.0973918	1.53866	0.123888	0.433653	2980.19	3016.51	2670.22	2735.32	8	85560648	85567294	-1	19358	protein_coding	Rad23a	RAD23 homolog A, nucleotide excision repair protein [Source:MGI Symbol;Acc:MGI:105126]
ENSMUSG00000003814	11994.2	-1.18123	-0.240295	0.0926647	-2.59316	0.00950983	0.0774256	10507	11487.9	13457.5	12524.3	8	85568479	85573563	-1	12317	protein_coding	Calr	calreticulin [Source:MGI Symbol;Acc:MGI:88252]
ENSMUSG00000003824	154.058	1.34699	0.42974	0.380462	1.12952	0.258679	0.645355	188.143	165.186	74.6915	188.21	8	85598740	85614850	1	71846	protein_coding	Syce2	synaptonemal complex central element protein 2 [Source:MGI Symbol;Acc:MGI:1919096]
ENSMUSG00000003847	7450.17	-1.24522	-0.316398	0.0991353	-3.19158	0.00141499	0.0174142	6189.37	7082.33	8126.43	8402.53	8	108020102	108106149	1	54446	protein_coding	Nfat5	nuclear factor of activated T cells 5 [Source:MGI Symbol;Acc:MGI:1859333]
ENSMUSG00000003848	5216.1	1.05021	0.0706734	0.0912321	0.774655	0.438543	0.7995	5242.2	5445.49	5206.93	4969.79	8	108139118	108151683	-1	67619	protein_coding	Nob1	NIN1/RPN12 binding protein 1 homolog [Source:MGI Symbol;Acc:MGI:1914869]
ENSMUSG00000003849	21.9486	1.56347	0.64475	0.690971	0.933107	0.350765	0.73758	22.5772	30.9723	19.6065	14.6386	8	108114857	108129838	-1	18104	protein_coding	Nqo1	NAD(P)H dehydrogenase, quinone 1 [Source:MGI Symbol;Acc:MGI:103187]
ENSMUSG00000003863	150.509	-1.06711	-0.0937155	0.29127	-0.321748	0.747644	0.940006	165.566	125.766	138.179	172.526	7	44988546	45016443	-1	76787	protein_coding	Ppfia3	protein tyrosine phosphatase, receptor type, f polypeptide (PTPRF), interacting protein (liprin), alpha 3 [Source:MGI Symbol;Acc:MGI:1924037]
ENSMUSG00000003865	6418.08	-1.10614	-0.145539	0.307143	-0.473848	0.635608	0.90414	6466.75	5722.37	5370.32	8112.9	7	45084268	45106043	1	14936	protein_coding	Gys1	glycogen synthase 1, muscle [Source:MGI Symbol;Acc:MGI:101805]
ENSMUSG00000003868	7385.68	1.07691	0.106903	0.0987721	1.08232	0.279111	0.668605	7838.58	7479.34	6658.75	7566.05	7	45071184	45087520	-1	20174	protein_coding	Ruvbl2	RuvB-like protein 2 [Source:MGI Symbol;Acc:MGI:1342299]
ENSMUSG00000003872	11.4608	1.56261	0.643959	0.936097	0.687919	0.491504	0.832351	12.9012	15.0169	7.46915	10.4561	7	45017315	45020007	-1	22342	protein_coding	Lin7b	lin-7 homolog B (C. elegans) [Source:MGI Symbol;Acc:MGI:1330858]
ENSMUSG00000003873	1251.1	-1.07897	-0.109656	0.120595	-0.909287	0.363199	0.746262	1192.29	1214.49	1252.95	1344.66	7	45111121	45116322	-1	12028	protein_coding	Bax	BCL2-associated X protein [Source:MGI Symbol;Acc:MGI:99702]
ENSMUSG00000003882	970.355	-1.12439	-0.169144	0.138862	-1.21807	0.223197	0.599939	894.486	931.985	947.648	1107.3	15	9505874	9530262	-1	16197	protein_coding	Il7r	interleukin 7 receptor [Source:MGI Symbol;Acc:MGI:96562]
ENSMUSG00000003923	2182.33	1.07606	0.105757	0.108617	0.97367	0.33022	0.720646	2240.51	2284.44	2206.2	1998.16	10	71061294	71074110	-1	21780	protein_coding	Tfam	transcription factor A, mitochondrial [Source:MGI Symbol;Acc:MGI:107810]
ENSMUSG00000003929	950.615	-1.16688	-0.222661	0.129304	-1.722	0.085069	0.350689	883.735	870.979	998.999	1048.75	17	33548316	33577852	-1	224694	protein_coding	Zfp81	zinc finger protein 81 [Source:MGI Symbol;Acc:MGI:1890752]
ENSMUSG00000003934	99.4328	-1.22459	-0.292293	0.343478	-0.85098	0.39478	0.770241	91.3838	87.2856	91.4971	127.565	11	69444918	69451031	-1	13643	protein_coding	Efnb3	ephrin B3 [Source:MGI Symbol;Acc:MGI:109196]
ENSMUSG00000003948	300.05	-1.09086	-0.125461	0.205346	-0.610977	0.541215	0.860715	291.353	282.505	287.562	338.778	11	90140282	90169415	1	67468	protein_coding	Mmd	monocyte to macrophage differentiation-associated [Source:MGI Symbol;Acc:MGI:1914718]
ENSMUSG00000003955	7943.32	1.02419	0.0344859	0.286817	0.120237	0.904296	0.97965	8644.9	7431.47	6406.66	9290.26	16	35864131	35891964	-1	70186	protein_coding	Fam162a	family with sequence similarity 162, member A [Source:MGI Symbol;Acc:MGI:1917436]
ENSMUSG00000003970	54850.5	1.07053	0.0983285	0.0888078	1.10721	0.268205	0.657526	57838.4	55599	50219.8	55744.7	15	76788278	76790514	1	26961	protein_coding	Rpl8	ribosomal protein L8 [Source:MGI Symbol;Acc:MGI:1350927]
ENSMUSG00000003992	1128.17	1.02947	0.0418972	0.122228	0.342781	0.731764	0.934154	1121.33	1167.56	1109.17	1114.62	13	91608402	91851548	1	66970	protein_coding	Ssbp2	single-stranded DNA binding protein 2 [Source:MGI Symbol;Acc:MGI:1914220]
ENSMUSG00000004018	432.022	1.0864	0.119557	0.185136	0.645781	0.518421	0.849767	467.67	432.674	456.552	371.192	11	26336135	26421876	1	67030	protein_coding	Fancl	Fanconi anemia, complementation group L [Source:MGI Symbol;Acc:MGI:1914280]
ENSMUSG00000004032	2.99099	1.89312	0.920768	2.0215	0.455487	0.648759		2.15021	5.63133	0	4.18245	3	107803137	107806002	1	14866	protein_coding	Gstm5	glutathione S-transferase, mu 5 [Source:MGI Symbol;Acc:MGI:1309466]
ENSMUSG00000004040	9185.76	-1.00631	-0.00908009	0.084365	-0.107629	0.91429	0.98245	9024.42	9288.87	9147.84	9281.89	11	100775924	100830366	-1	20848	protein_coding	Stat3	signal transducer and activator of transcription 3 [Source:MGI Symbol;Acc:MGI:103038]
ENSMUSG00000004043	1567.25	1.17655	0.234566	0.114307	2.05207	0.0401627	0.217911	1655.66	1732.57	1393.93	1486.86	11	100750177	100775995	1	20850	protein_coding	Stat5a	signal transducer and activator of transcription 5A [Source:MGI Symbol;Acc:MGI:103036]
ENSMUSG00000004044	47.3394	-1.09419	-0.129864	0.550707	-0.235813	0.813578	0.958888	53.7552	36.6036	28.943	70.056	11	100847559	100861713	-1	19285	protein_coding	Cavin1	caveolae associated 1 [Source:MGI Symbol;Acc:MGI:1277968]
ENSMUSG00000004054	1725.04	-1.15946	-0.213457	0.116943	-1.8253	0.067956	0.305866	1611.58	1583.34	1738.44	1966.8	19	5738770	5752893	1	26403	protein_coding	Map3k11	mitogen-activated protein kinase kinase kinase 11 [Source:MGI Symbol;Acc:MGI:1346880]
ENSMUSG00000004056	3830.05	-1.0133	-0.0190664	0.0927362	-0.205599	0.837104	0.963476	3756.41	3852.77	3830.74	3880.26	7	27290977	27340251	1	11652	protein_coding	Akt2	thymoma viral proto-oncogene 2 [Source:MGI Symbol;Acc:MGI:104874]
ENSMUSG00000004069	3916.97	1.03703	0.0524525	0.0918289	0.571198	0.567865	0.87315	3978.96	3997.3	3835.41	3856.22	16	4457853	4525559	1	83945	protein_coding	Dnaja3	DnaJ heat shock protein family (Hsp40) member A3 [Source:MGI Symbol;Acc:MGI:1933786]
ENSMUSG00000004070	1434.88	1.11278	0.154165	0.118679	1.299	0.193942	0.561127	1541.7	1481.04	1296.83	1419.94	16	4544225	4584606	1	15369	protein_coding	Hmox2	heme oxygenase 2 [Source:MGI Symbol;Acc:MGI:109373]
ENSMUSG00000004071	957.087	1.04634	0.065358	0.138164	0.473047	0.63618	0.904289	992.32	965.773	1005.53	864.721	16	4568212	4608156	-1	66626	protein_coding	Cdip1	cell death inducing Trp53 target 1 [Source:MGI Symbol;Acc:MGI:1913876]
ENSMUSG00000004085	366.321	-2.8617	-1.51687	0.192079	-7.89712	2.85433e-15	2.13895e-13	176.317	202.728	533.11	553.129	2	72115981	72272954	1	65964	protein_coding	Map3k20	mitogen-activated protein kinase kinase kinase 20 [Source:MGI Symbol;Acc:MGI:2443258]
ENSMUSG00000004096	4574.09	-1.06455	-0.0902447	0.0940707	-0.959329	0.337393	0.727604	4325.14	4536.97	4850.28	4583.96	9	14411913	14421873	1	66070	protein_coding	Cwc15	CWC15 spliceosome-associated protein [Source:MGI Symbol;Acc:MGI:1913320]
ENSMUSG00000004098	14.2414	3.40758	1.76875	0.902606	1.9596	0.0500427	0.249917	29.0278	15.0169	5.60186	7.31928	9	20681346	20726363	-1	53867	protein_coding	Col5a3	collagen, type V, alpha 3 [Source:MGI Symbol;Acc:MGI:1858212]
ENSMUSG00000004099	5064.85	1.16543	0.220861	0.0985059	2.24211	0.0249541	0.156005	5507.75	5396.69	4944.58	4410.39	9	20818505	20871184	-1	13433	protein_coding	Dnmt1	DNA methyltransferase (cytosine-5) 1 [Source:MGI Symbol;Acc:MGI:94912]
ENSMUSG00000004100	5150.87	1.09695	0.133503	0.101131	1.3201	0.186802	0.550418	5292.73	5485.85	5228.4	4596.51	9	20799471	20803474	1	235036	protein_coding	Ppan	peter pan homolog [Source:MGI Symbol;Acc:MGI:2178445]
ENSMUSG00000004105	22.0417	-2.1619	-1.1123	0.730948	-1.52172	0.128079	0.443601	11.8261	15.9554	19.6065	40.7788	2	33106081	33137729	1	26360	protein_coding	Angptl2	angiopoietin-like 2 [Source:MGI Symbol;Acc:MGI:1347002]
ENSMUSG00000004110	18.5091	-3.35252	-1.74524	0.810842	-2.15238	0.0313671	0.183392	8.60082	8.44699	39.213	17.7754	1	154266477	154760247	-1	12290	protein_coding	Cacna1e	calcium channel, voltage-dependent, R type, alpha 1E subunit [Source:MGI Symbol;Acc:MGI:106217]
ENSMUSG00000004113	248.316	-1.57073	-0.651431	0.232042	-2.80739	0.00499453	0.0480422	195.669	190.527	265.155	341.915	2	24493899	24653164	-1	12287	protein_coding	Cacna1b	calcium channel, voltage-dependent, N type, alpha 1B subunit [Source:MGI Symbol;Acc:MGI:88296]
ENSMUSG00000004127	634.805	-1.11914	-0.162388	0.147591	-1.10025	0.271222	0.660991	588.081	610.06	675.024	666.055	3	137849209	137865582	1	108943	protein_coding	Trmt10a	tRNA methyltransferase 10A [Source:MGI Symbol;Acc:MGI:1920421]
ENSMUSG00000004151	31.4944	-1.47914	-0.564756	0.669502	-0.843547	0.398923	0.772691	13.9763	36.6036	25.2084	50.1894	12	38829379	38920483	1	14009	protein_coding	Etv1	ets variant 1 [Source:MGI Symbol;Acc:MGI:99254]
ENSMUSG00000004187	68.5238	-1.00259	-0.00373165	0.390439	-0.00955758	0.992374	0.998373	73.107	63.8217	68.156	69.0104	15	76544058	76552396	1	16581	protein_coding	Kifc2	kinesin family member C2 [Source:MGI Symbol;Acc:MGI:109187]
ENSMUSG00000004207	23296.6	-1.02551	-0.0363463	0.0813952	-0.446542	0.655206	0.909129	22757.8	23248	23117	24063.7	10	60113449	60138376	1	19156	protein_coding	Psap	prosaposin [Source:MGI Symbol;Acc:MGI:97783]
ENSMUSG00000004221	2873.84	1.05066	0.0713019	0.102722	0.694125	0.487604	0.830511	2885.58	3004.31	2921.37	2684.08	X	73436896	73497460	1	16151	protein_coding	Ikbkg	inhibitor of kappaB kinase gamma [Source:MGI Symbol;Acc:MGI:1338074]
ENSMUSG00000004233	715.026	1.16967	0.226096	0.144844	1.56096	0.118533	0.422506	745.046	796.833	682.493	635.732	3	99048384	99146502	1	70560	protein_coding	Wars2	tryptophanyl tRNA synthetase 2 (mitochondrial) [Source:MGI Symbol;Acc:MGI:1917810]
ENSMUSG00000004263	86.6289	1.30603	0.385184	0.355771	1.08267	0.278953	0.668563	88.1585	107.934	70.9569	79.4665	6	124719507	124733487	-1	13498	protein_coding	Atn1	atrophin 1 [Source:MGI Symbol;Acc:MGI:104725]
ENSMUSG00000004264	7765.09	1.01671	0.0239081	0.0877763	0.272375	0.785334	0.951213	7716.01	7942.99	7903.29	7498.08	6	124689299	124693913	1	12034	protein_coding	Phb2	prohibitin 2 [Source:MGI Symbol;Acc:MGI:102520]
ENSMUSG00000004266	26209	1.18439	0.244147	0.088459	2.76001	0.00578	0.0534772	28651.5	28192.3	25216.8	22775.5	6	124697670	124715677	-1	15170	protein_coding	Ptpn6	protein tyrosine phosphatase, non-receptor type 6 [Source:MGI Symbol;Acc:MGI:96055]
ENSMUSG00000004268	5550.39	-1.04443	-0.0627128	0.0898516	-0.697959	0.485203	0.82936	5407.77	5452.06	5815.67	5526.06	6	124681048	124689141	-1	14791	protein_coding	Emg1	EMG1 N1-specific pseudouridine methyltransferase [Source:MGI Symbol;Acc:MGI:1315195]
ENSMUSG00000004270	1694.33	1.02835	0.0403349	0.130683	0.308646	0.757591	0.942693	1762.09	1673.44	1499.43	1842.37	6	124639990	124681381	1	14792	protein_coding	Lpcat3	lysophosphatidylcholine acyltransferase 3 [Source:MGI Symbol;Acc:MGI:1315211]
ENSMUSG00000004285	3378.3	1.02949	0.0419245	0.0966196	0.433913	0.664352	0.912083	3414.53	3439.8	3231.34	3427.51	6	29467717	29470511	1	66144	protein_coding	Atp6v1f	ATPase, H+ transporting, lysosomal V1 subunit F [Source:MGI Symbol;Acc:MGI:1913394]
ENSMUSG00000004317	1847.32	-1.06479	-0.0905641	0.111668	-0.811014	0.417358	0.786276	1831.98	1746.65	1827.14	1983.53	X	7020049	7185597	-1	12728	protein_coding	Clcn5	chloride channel, voltage-sensitive 5 [Source:MGI Symbol;Acc:MGI:99486]
ENSMUSG00000004319	5755.99	1.01535	0.021984	0.330474	0.0665225	0.946962	0.989189	6429.12	5170.5	4559.92	6864.44	8	61363423	61436334	-1	12725	protein_coding	Clcn3	chloride channel, voltage-sensitive 3 [Source:MGI Symbol;Acc:MGI:103555]
ENSMUSG00000004328	7.3529	3.88665	1.95853	1.24125	1.57787	0.114596		13.9763	9.38555	1.86729	4.18245	7	16765432	16796352	-1	53417	protein_coding	Hif3a	hypoxia inducible factor 3, alpha subunit [Source:MGI Symbol;Acc:MGI:1859778]
ENSMUSG00000004356	5285.53	-1.00168	-0.00242461	0.115393	-0.0210118	0.983236	0.995688	5055.13	5507.44	5806.33	4773.22	10	88582469	88662666	-1	70683	protein_coding	Utp20	UTP20 small subunit processome component [Source:MGI Symbol;Acc:MGI:1917933]
ENSMUSG00000004364	7813.37	-1.05126	-0.0721239	0.0887444	-0.812715	0.416382	0.785427	7352.63	7882.92	8002.26	8015.66	1	80242640	80318197	-1	26554	protein_coding	Cul3	cullin 3 [Source:MGI Symbol;Acc:MGI:1347360]
ENSMUSG00000004371	8.67254	-1.32487	-0.405849	1.06368	-0.381552	0.702793		6.45062	8.44699	9.33644	10.4561	7	4775372	4785858	-1	16156	protein_coding	Il11	interleukin 11 [Source:MGI Symbol;Acc:MGI:107613]
ENSMUSG00000004393	4023.02	1.08248	0.114341	0.0983792	1.16225	0.245136	0.629665	4142.37	4221.62	3679.49	4048.61	11	6208919	6217772	-1	52513	protein_coding	Ddx56	DEAD box helicase 56 [Source:MGI Symbol;Acc:MGI:1277172]
ENSMUSG00000004394	2039.56	1.04085	0.0577679	0.10717	0.539032	0.589865	0.883686	2113.65	2046.99	1933.58	2064.04	11	6220369	6224870	-1	103694	protein_coding	Tmed4	transmembrane p24 trafficking protein 4 [Source:MGI Symbol;Acc:MGI:1915070]
ENSMUSG00000004415	14.454	-1.82709	-0.86955	0.866149	-1.00393	0.315414	0.706387	13.9763	6.56988	20.5402	16.7298	5	136770613	136912063	-1	140709	protein_coding	Col26a1	collagen, type XXVI, alpha 1 [Source:MGI Symbol;Acc:MGI:2155345]
ENSMUSG00000004446	4149.8	1.08025	0.111367	0.100512	1.10799	0.267864	0.657147	4215.48	4404.64	4202.33	3776.75	6	120868891	120893814	-1	12122	protein_coding	Bid	BH3 interacting domain death agonist [Source:MGI Symbol;Acc:MGI:108093]
ENSMUSG00000004451	1911.52	-1.23644	-0.306188	0.117121	-2.6143	0.00894112	0.0739296	1638.46	1779.5	1990.53	2237.61	1	119398035	119432524	-1	64143	protein_coding	Ralb	v-ral simian leukemia viral oncogene B [Source:MGI Symbol;Acc:MGI:1927244]
ENSMUSG00000004455	4628.23	-1.22309	-0.29053	0.104339	-2.78448	0.00536139	0.0505517	4141.3	4186.89	5462.75	4721.98	5	122296341	122313336	1	19047	protein_coding	Ppp1cc	protein phosphatase 1 catalytic subunit gamma [Source:MGI Symbol;Acc:MGI:104872]
ENSMUSG00000004455	4628.23	-1.22309	-0.29053	0.104339	-2.78448	0.00536139	0.0505517	4141.3	4186.89	5462.75	4721.98	5	122296341	122313336	1	434233	protein_coding	Ppp1cc	protein phosphatase 1 catalytic subunit gamma [Source:MGI Symbol;Acc:MGI:104872]
ENSMUSG00000004460	3499.93	-1.15489	-0.207759	0.0973109	-2.135	0.0327611	0.189001	3185.53	3311.22	3865.28	3637.68	16	22676595	22698384	1	67838	protein_coding	Dnajb11	DnaJ heat shock protein family (Hsp40) member B11 [Source:MGI Symbol;Acc:MGI:1915088]
ENSMUSG00000004462	763.879	1.04356	0.0615194	0.139489	0.441034	0.659189	0.909657	762.248	797.771	730.109	765.388	16	22631964	22676419	-1	70573	protein_coding	Tbccd1	TBCC domain containing 1 [Source:MGI Symbol;Acc:MGI:1917823]
ENSMUSG00000004500	422.887	1.13841	0.187023	0.174959	1.06895	0.285093	0.675542	448.318	452.383	415.471	375.375	7	12699765	12708163	1	243834	protein_coding	Zfp324	zinc finger protein 324 [Source:MGI Symbol;Acc:MGI:2444641]
ENSMUSG00000004508	4707.8	1.00237	0.0034124	0.0898427	0.037982	0.969702	0.991949	4767.01	4659.92	4699.03	4705.25	7	96730793	96958153	1	14389	protein_coding	Gab2	growth factor receptor bound protein 2-associated protein 2 [Source:MGI Symbol;Acc:MGI:1333854]
ENSMUSG00000004530	3823.37	-1.3319	-0.413486	0.0966543	-4.27799	1.88587e-05	0.000447636	3169.4	3388.18	4282.62	4453.26	5	113980497	114046819	-1	23790	protein_coding	Coro1c	coronin, actin binding protein 1C [Source:MGI Symbol;Acc:MGI:1345964]
ENSMUSG00000004535	11060.6	-1.09425	-0.129942	0.0833863	-1.55831	0.11916	0.423841	10399.5	10725.8	11475.4	11641.8	6	52690714	52743765	1	52440	protein_coding	Tax1bp1	Tax1 (human T cell leukemia virus type I) binding protein 1 [Source:MGI Symbol;Acc:MGI:1289308]
ENSMUSG00000004552	129.865	-1.07005	-0.0976831	0.315655	-0.309461	0.756971	0.942693	110.736	139.845	112.037	156.842	1	131566044	131603243	1	13034	protein_coding	Ctse	cathepsin E [Source:MGI Symbol;Acc:MGI:107361]
ENSMUSG00000004558	965.546	-1.98187	-0.98686	0.592778	-1.66481	0.0959512	0.37688	679.465	615.692	758.119	1808.91	14	52142728	52151615	-1	29811	protein_coding	Ndrg2	N-myc downstream regulated gene 2 [Source:MGI Symbol;Acc:MGI:1352498]
ENSMUSG00000004561	1435.7	1.03467	0.0491639	0.123439	0.398283	0.690421	0.919811	1358.93	1560.82	1421.94	1401.12	14	52122299	52130496	1	52535	protein_coding	Mettl17	methyltransferase like 17 [Source:MGI Symbol;Acc:MGI:1098577]
ENSMUSG00000004562	15.3304	1.21358	0.279264	0.911765	0.306289	0.759385	0.942727	13.9763	19.7096	22.4074	5.22806	14	52222176	52243708	1	268739	protein_coding	Arhgef40	Rho guanine nucleotide exchange factor (GEF) 40 [Source:MGI Symbol;Acc:MGI:2685515]
ENSMUSG00000004565	3084.21	1.07274	0.101295	0.0992407	1.0207	0.307394	0.698926	3172.63	3211.73	2870.02	3082.46	8	3565384	3594267	1	50767	protein_coding	Pnpla6	patatin-like phospholipase domain containing 6 [Source:MGI Symbol;Acc:MGI:1354723]
ENSMUSG00000004567	1753.4	-1.18958	-0.250455	0.124418	-2.01302	0.0441127	0.231192	1597.6	1604.93	1736.58	2074.49	8	3550457	3565232	1	94178	protein_coding	Mcoln1	mucolipin 1 [Source:MGI Symbol;Acc:MGI:1890498]
ENSMUSG00000004568	1062.56	1.64572	0.718717	0.124252	5.78433	7.28014e-09	3.16719e-07	1321.3	1322.42	798.265	808.258	8	3403415	3506601	1	102098	protein_coding	Arhgef18	rho/rac guanine nucleotide exchange factor (GEF) 18 [Source:MGI Symbol;Acc:MGI:2142567]
ENSMUSG00000004591	2649.99	-1.06605	-0.0922751	0.10193	-0.905279	0.365318	0.747438	2531.87	2598.86	2828.01	2641.21	3	142496663	142587765	-1	109333	protein_coding	Pkn2	protein kinase N2 [Source:MGI Symbol;Acc:MGI:109211]
ENSMUSG00000004609	4390.67	-2.36036	-1.239	0.318529	-3.88977	0.000100338	0.00192511	2552.29	2673.94	4810.13	7526.31	7	43173640	43193852	-1	12489	protein_coding	Cd33	CD33 antigen [Source:MGI Symbol;Acc:MGI:99440]
ENSMUSG00000004610	131.802	-1.09915	-0.13639	0.337605	-0.403993	0.686218	0.917671	124.712	126.705	176.459	99.3331	7	43093507	43107224	1	110826	protein_coding	Etfb	electron transferring flavoprotein, beta polypeptide [Source:MGI Symbol;Acc:MGI:106098]
ENSMUSG00000004626	10052.8	1.01623	0.0232216	0.105066	0.221019	0.825078	0.960747	10111.3	10155.2	9077.82	10867	8	3680955	3693644	1	20911	protein_coding	Stxbp2	syntaxin binding protein 2 [Source:MGI Symbol;Acc:MGI:107370]
ENSMUSG00000004630	2.83665	-1.80545	-0.852361	2.11339	-0.403315	0.686717		2.15021	1.87711	0	7.31928	8	3673371	3675545	-1	18545	protein_coding	Pcp2	Purkinje cell protein 2 (L7) [Source:MGI Symbol;Acc:MGI:97508]
ENSMUSG00000004637	616.598	1.33335	0.415058	0.150575	2.75649	0.00584245	0.0538976	682.69	726.441	521.907	535.353	8	115166395	116079447	1	80707	protein_coding	Wwox	WW domain-containing oxidoreductase [Source:MGI Symbol;Acc:MGI:1931237]
ENSMUSG00000004642	3414.98	-1.07208	-0.100418	0.102845	-0.976401	0.328866	0.72019	3129.63	3462.33	3630.01	3437.97	5	33792296	33809918	-1	20492	protein_coding	Slbp	stem-loop binding protein [Source:MGI Symbol;Acc:MGI:108402]
ENSMUSG00000004661	2116.29	-1.207	-0.271427	0.103869	-2.61318	0.00897051	0.0740028	1943.79	1892.13	2342.51	2286.75	9	57697636	57744076	-1	56380	protein_coding	Arid3b	AT rich interactive domain 3B (BRIGHT-like) [Source:MGI Symbol;Acc:MGI:1930768]
ENSMUSG00000004665	3146.58	1.1571	0.210516	0.0970138	2.16996	0.0300098	0.178416	3368.3	3383.49	2990.46	2844.06	10	79824418	79831896	1	12798	protein_coding	Cnn2	calponin 2 [Source:MGI Symbol;Acc:MGI:105093]
ENSMUSG00000004667	3015.86	1.01874	0.0267921	0.106102	0.252512	0.800645	0.956293	3048.99	3038.1	2801.86	3174.48	10	79871783	79875629	-1	66420	protein_coding	Polr2e	polymerase (RNA) II (DNA directed) polypeptide E [Source:MGI Symbol;Acc:MGI:1913670]
ENSMUSG00000004677	5970.1	-1.0658	-0.0919421	0.0972601	-0.945322	0.344495	0.733088	5891.56	5667.93	5820.33	6500.57	8	71725358	71813357	1	17925	protein_coding	Myo9b	myosin IXb [Source:MGI Symbol;Acc:MGI:106624]
ENSMUSG00000004698	674.403	-1.04425	-0.0624739	0.162066	-0.385484	0.699879	0.923685	729.995	590.351	713.304	663.963	12	34097579	34967094	-1	79221	protein_coding	Hdac9	histone deacetylase 9 [Source:MGI Symbol;Acc:MGI:1931221]
ENSMUSG00000004707	2133.69	1.11849	0.161554	0.112894	1.43103	0.152422	0.490032	2142.68	2363.28	2100.7	1928.11	1	171416192	171434978	-1	17085	protein_coding	Ly9	lymphocyte antigen 9 [Source:MGI Symbol;Acc:MGI:96885]
ENSMUSG00000004709	415.515	-1.05913	-0.0828773	0.181789	-0.455898	0.648463	0.907463	417.14	390.439	460.286	394.196	1	171386761	171437314	1	18106	protein_coding	Cd244a	CD244 molecule A [Source:MGI Symbol;Acc:MGI:109294]
ENSMUSG00000004730	296.92	-2.04215	-1.03009	0.229583	-4.48676	7.23144e-06	0.000190264	164.491	225.253	365.055	432.883	17	57665691	57790527	1	13733	protein_coding	Adgre1	adhesion G protein-coupled receptor E1 [Source:MGI Symbol;Acc:MGI:106912]
ENSMUSG00000004748	91.8711	-1.20636	-0.270664	0.349121	-0.775271	0.438179	0.799141	77.4074	89.1627	112.037	88.877	11	4041480	4045445	-1	67900	protein_coding	Mtfp1	mitochondrial fission process 1 [Source:MGI Symbol;Acc:MGI:1916686]
ENSMUSG00000004768	391.192	1.12196	0.166026	0.19508	0.851067	0.394732	0.770241	398.863	427.981	324.908	413.017	1	33758968	33781645	1	19335	protein_coding	Rab23	RAB23, member RAS oncogene family [Source:MGI Symbol;Acc:MGI:99833]
ENSMUSG00000004771	1949.49	-1.00565	-0.00813256	0.106849	-0.0761129	0.939329	0.98741	1929.81	1957.82	1902.77	2007.57	9	64622581	64645040	-1	53869	protein_coding	Rab11a	RAB11A, member RAS oncogene family [Source:MGI Symbol;Acc:MGI:1858202]
ENSMUSG00000004788	3732.11	1.08055	0.11176	0.0935574	1.19457	0.232257	0.612527	3823.07	3929.73	3543.18	3632.45	12	85266255	85273402	1	217715	protein_coding	Eif2b2	eukaryotic translation initiation factor 2B, subunit 2 beta [Source:MGI Symbol;Acc:MGI:2145118]
ENSMUSG00000004789	11798.1	-1.02699	-0.0384254	0.0900358	-0.42678	0.66954	0.913482	11171.4	12110.2	12279.3	11631.4	12	85157607	85181619	1	78920	protein_coding	Dlst	dihydrolipoamide S-succinyltransferase (E2 component of 2-oxo-glutarate complex) [Source:MGI Symbol;Acc:MGI:1926170]
ENSMUSG00000004791	768.484	1.36929	0.453427	0.151025	3.00234	0.00267917	0.0294297	952.541	824.051	612.47	684.876	12	85213409	85224564	-1	18654	protein_coding	Pgf	placental growth factor [Source:MGI Symbol;Acc:MGI:105095]
ENSMUSG00000004798	912.111	1.12094	0.164714	0.140824	1.16964	0.242146	0.625038	1015.97	912.275	809.469	910.728	11	61666475	61745899	-1	29869	protein_coding	Ulk2	unc-51 like kinase 2 [Source:MGI Symbol;Acc:MGI:1352758]
ENSMUSG00000004814	13.7864	-10.4018	-3.37876	1.12756	-2.99653	0.00273072	0.0299271	0	4.69277	32.6775	17.7754	5	135598791	135601903	-1	56221	protein_coding	Ccl24	chemokine (C-C motif) ligand 24 [Source:MGI Symbol;Acc:MGI:1928953]
ENSMUSG00000004815	270.625	1.16627	0.221906	0.208712	1.06322	0.287683	0.678125	303.179	279.689	245.548	254.084	5	108794559	108817538	-1	110524	protein_coding	Dgkq	diacylglycerol kinase, theta [Source:MGI Symbol;Acc:MGI:102918]
ENSMUSG00000004837	3088.75	-1.11951	-0.162867	0.0965844	-1.68626	0.0917454	0.36629	2971.58	2857.9	3262.15	3263.35	11	61544091	61563610	1	71520	protein_coding	Grap	GRB2-related adaptor protein [Source:MGI Symbol;Acc:MGI:1918770]
ENSMUSG00000004843	1963.51	1.00369	0.00531587	0.106346	0.0499868	0.960133	0.99133	1966.36	1968.15	2009.2	1910.33	16	65336014	65359612	-1	68942	protein_coding	Chmp2b	charged multivesicular body protein 2B [Source:MGI Symbol;Acc:MGI:1916192]
ENSMUSG00000004846	1615.58	-1.18684	-0.247131	0.142848	-1.73003	0.0836256	0.347239	1507.29	1447.25	1519.04	1988.75	5	137015873	137025502	1	26433	protein_coding	Plod3	procollagen-lysine, 2-oxoglutarate 5-dioxygenase 3 [Source:MGI Symbol;Acc:MGI:1347008]
ENSMUSG00000004849	3309.87	-1.26764	-0.342143	0.116334	-2.94105	0.00327103	0.0346802	2971.58	2866.35	3350.85	4050.7	5	137063847	137074989	-1	11769	protein_coding	Ap1s1	adaptor protein complex AP-1, sigma 1 [Source:MGI Symbol;Acc:MGI:1098244]
ENSMUSG00000004865	6621.39	1.10141	0.13935	0.0932638	1.49415	0.135137	0.456328	6767.77	7114.24	6558.85	6044.68	17	28806622	28841683	-1	20815	protein_coding	Srpk1	serine/arginine-rich protein specific kinase 1 [Source:MGI Symbol;Acc:MGI:106908]
ENSMUSG00000004880	11202.5	1.18168	0.240845	0.0897101	2.68471	0.00725928	0.0631624	12088.5	12181.5	9792.05	10747.8	1	181642900	181670611	-1	98386	protein_coding	Lbr	lamin B receptor [Source:MGI Symbol;Acc:MGI:2138281]
ENSMUSG00000004885	20.3575	1.68432	0.752168	0.711776	1.05675	0.290627	0.680864	25.8025	25.341	17.7392	12.5473	3	87855973	87860683	1	12904	protein_coding	Crabp2	cellular retinoic acid binding protein II [Source:MGI Symbol;Acc:MGI:88491]
ENSMUSG00000004891	94.8343	-2.98812	-1.57924	0.348991	-4.52515	6.03522e-06	0.000161462	46.2294	48.8048	131.644	152.659	3	87878385	87887758	1	18008	protein_coding	Nes	nestin [Source:MGI Symbol;Acc:MGI:101784]
ENSMUSG00000004895	2254.72	1.04735	0.0667368	0.102808	0.649139	0.516248	0.848649	2257.72	2355.77	2212.74	2192.65	3	87766210	87792915	-1	94315	protein_coding	Prcc	papillary renal cell carcinoma (translocation-associated) [Source:MGI Symbol;Acc:MGI:2137738]
ENSMUSG00000004896	1147.98	-1.00718	-0.0103247	0.131922	-0.0782636	0.937618	0.98741	1207.34	1081.21	1212.8	1090.57	3	87829908	87838024	-1	229503	protein_coding	Rrnad1	ribosomal RNA adenine dimethylase domain containing 1 [Source:MGI Symbol;Acc:MGI:2387197]
ENSMUSG00000004897	16378.9	-1.01937	-0.0276832	0.0880199	-0.314511	0.753133	0.94219	15856.7	16587.1	17199.6	15872.4	3	87813628	87823439	1	15191	protein_coding	Hdgf	heparin binding growth factor [Source:MGI Symbol;Acc:MGI:1194494]
ENSMUSG00000004902	55.6704	-1.22714	-0.295295	0.444077	-0.664964	0.506073	0.841472	56.9805	43.1735	68.156	54.3718	6	120750539	120771297	1	71803	protein_coding	Slc25a18	solute carrier family 25 (mitochondrial carrier), member 18 [Source:MGI Symbol;Acc:MGI:1919053]
ENSMUSG00000004929	2303.92	1.13956	0.188477	0.101937	1.84895	0.0644654	0.2962	2497.46	2411.15	2152.05	2155.01	10	80905869	80918393	1	50492	protein_coding	Thop1	thimet oligopeptidase 1 [Source:MGI Symbol;Acc:MGI:1354165]
ENSMUSG00000004931	1997.64	1.00178	0.00256235	0.147693	0.0173492	0.986158	0.996692	2114.73	1883.68	1700.16	2291.98	10	81102794	81109080	1	57267	protein_coding	Apba3	amyloid beta (A4) precursor protein-binding, family A, member 3 [Source:MGI Symbol;Acc:MGI:1888527]
ENSMUSG00000004933	113.528	-1.03985	-0.0563774	0.320304	-0.176012	0.860284	0.969454	119.336	103.241	100.834	130.701	10	81088769	81099199	1	17179	protein_coding	Matk	megakaryocyte-associated tyrosine kinase [Source:MGI Symbol;Acc:MGI:99259]
ENSMUSG00000004934	2685.95	-1.05839	-0.0818776	0.106719	-0.767223	0.442949	0.803845	2574.87	2643.91	2606.73	2918.3	10	80989100	81003757	-1	59004	protein_coding	Pias4	protein inhibitor of activated STAT 4 [Source:MGI Symbol;Acc:MGI:2136940]
ENSMUSG00000004936	6062.31	-1.05524	-0.0775681	0.124826	-0.62141	0.53433	0.85816	6250.65	5547.8	5487.02	6963.77	9	64093052	64160913	-1	26395	protein_coding	Map2k1	mitogen-activated protein kinase kinase 1 [Source:MGI Symbol;Acc:MGI:1346866]
ENSMUSG00000004937	4099.62	-1.03741	-0.0529815	0.101579	-0.521579	0.601964	0.888421	3920.9	4126.82	3945.58	4405.16	10	80879909	80896015	-1	52551	protein_coding	Sgta	small glutamine-rich tetratricopeptide repeat (TPR)-containing, alpha [Source:MGI Symbol;Acc:MGI:1098703]
ENSMUSG00000004945	1203.4	1.04257	0.0601455	0.119233	0.504436	0.613955	0.894608	1224.54	1232.32	1168.92	1187.81	17	5461145	5490534	-1	70544	protein_coding	Tmem242	transmembrane protein 242 [Source:MGI Symbol;Acc:MGI:1917794]
ENSMUSG00000004947	1722.37	-1.02707	-0.0385367	0.11049	-0.348782	0.727253	0.932769	1683.61	1714.74	1692.7	1798.45	5	136023654	136061726	1	74198	protein_coding	Dtx2	deltex 2, E3 ubiquitin ligase [Source:MGI Symbol;Acc:MGI:1921448]
ENSMUSG00000004951	6.23261	1.5204	0.604453	1.24594	0.485137	0.627579		7.52572	7.50844	4.66822	5.22806	5	135916773	135918417	1	15507	protein_coding	Hspb1	heat shock protein 1 [Source:MGI Symbol;Acc:MGI:96240]
ENSMUSG00000004952	1862.98	1.01824	0.0260806	0.142615	0.182874	0.854897	0.967904	2076.02	1683.77	1664.69	2027.44	5	136112770	136140714	1	54153	protein_coding	Rasa4	RAS p21 protein activator 4 [Source:MGI Symbol;Acc:MGI:1858600]
ENSMUSG00000004980	50282.3	-1.07642	-0.106235	0.0999347	-1.06305	0.28776	0.678125	46720.8	50143.2	56210.9	48054.2	6	51437912	51446874	-1	53379	protein_coding	Hnrnpa2b1	heterogeneous nuclear ribonucleoprotein A2/B1 [Source:MGI Symbol;Acc:MGI:104819]
ENSMUSG00000004988	25.2116	-1.83533	-0.876039	0.67946	-1.28932	0.197288	0.56649	22.5772	13.1398	41.0803	24.0491	6	117910520	117914653	-1	108017	protein_coding	Fxyd4	FXYD domain-containing ion transport regulator 4 [Source:MGI Symbol;Acc:MGI:1889005]
ENSMUSG00000004994	719.655	-1.11192	-0.153048	0.145469	-1.0521	0.292753	0.683022	679.465	683.268	717.038	798.847	8	84984424	84997009	-1	67736	protein_coding	Ccdc130	coiled-coil domain containing 130 [Source:MGI Symbol;Acc:MGI:1914986]
ENSMUSG00000004996	1719.44	1.08866	0.122554	0.113538	1.07941	0.280403	0.669762	1827.68	1756.97	1574.12	1718.99	8	84976535	84983955	-1	67873	protein_coding	Mri1	methylthioribose-1-phosphate isomerase 1 [Source:MGI Symbol;Acc:MGI:1915123]
ENSMUSG00000005034	2607.57	1.2314	0.300297	0.106138	2.8293	0.00466502	0.045422	2908.15	2848.51	2461.08	2212.51	3	146435329	146518745	-1	18749	protein_coding	Prkacb	protein kinase, cAMP dependent, catalytic, beta [Source:MGI Symbol;Acc:MGI:97594]
ENSMUSG00000005043	58.7851	2.00917	1.0066	0.446783	2.253	0.024259	0.153272	84.9331	72.2687	47.6158	30.3227	11	119234251	119246362	-1	27029	protein_coding	Sgsh	N-sulfoglucosamine sulfohydrolase (sulfamidase) [Source:MGI Symbol;Acc:MGI:1350341]
ENSMUSG00000005045	96.0365	-1.23545	-0.305033	0.360667	-0.845748	0.397693	0.772205	96.7593	75.0844	86.8289	125.473	4	152423108	152474651	1	269610	protein_coding	Chd5	chromodomain helicase DNA binding protein 5 [Source:MGI Symbol;Acc:MGI:3036258]
ENSMUSG00000005054	2913.63	-1.41213	-0.497869	0.109519	-4.54598	5.46804e-06	0.000147947	2481.34	2350.14	3187.46	3635.59	10	78261503	78263456	1	13014	protein_coding	Cstb	cystatin B [Source:MGI Symbol;Acc:MGI:109514]
ENSMUSG00000005057	67.6692	-2.11926	-1.08356	0.435744	-2.48669	0.0128939	0.0966232	38.7037	47.8663	69.0896	115.017	5	136247001	136275410	-1	23921	protein_coding	Sh2b2	SH2B adaptor protein 2 [Source:MGI Symbol;Acc:MGI:1345171]
ENSMUSG00000005069	1653.12	-1.01502	-0.0215052	0.113575	-0.189349	0.849819	0.966966	1664.26	1617.13	1597.46	1733.62	6	124373775	124392026	-1	19305	protein_coding	Pex5	peroxisomal biogenesis factor 5 [Source:MGI Symbol;Acc:MGI:1098808]
ENSMUSG00000005078	737.729	1.00444	0.00639831	0.149804	0.0427112	0.965932	0.99133	739.671	738.642	676.892	795.71	12	72132363	72148235	1	104771	protein_coding	Jkamp	JNK1/MAPK8-associated membrane protein [Source:MGI Symbol;Acc:MGI:1915057]
ENSMUSG00000005087	1710.11	-1.44054	-0.526613	0.417227	-1.26217	0.206886	0.579919	1412.69	1390	1433.14	2604.62	2	102641486	102732010	-1	12505	protein_coding	Cd44	CD44 antigen [Source:MGI Symbol;Acc:MGI:88338]
ENSMUSG00000005102	1509.76	1.2579	0.33102	0.114884	2.88134	0.00395992	0.0402545	1723.39	1641.53	1373.39	1300.74	2	118219099	118305715	1	27103	protein_coding	Eif2ak4	eukaryotic translation initiation factor 2 alpha kinase 4 [Source:MGI Symbol;Acc:MGI:1353427]
ENSMUSG00000005103	8678	-1.28383	-0.360449	0.0938475	-3.84079	0.000122637	0.00230054	7456.92	7741.2	9244.94	10269	5	38684156	38720564	-1	22388	protein_coding	Wdr1	WD repeat domain 1 [Source:MGI Symbol;Acc:MGI:1337100]
ENSMUSG00000005107	474.15	1.30941	0.388915	0.174303	2.23125	0.0256644	0.159226	578.405	497.434	427.609	393.15	5	38506616	38660486	-1	117591	protein_coding	Slc2a9	solute carrier family 2 (facilitated glucose transporter), member 9 [Source:MGI Symbol;Acc:MGI:2152844]
ENSMUSG00000005124	2.55217	-2.20202	-1.13883	2.13049	-0.534538	0.59297		3.22531	0	2.80093	4.18245	15	66763169	66795050	1	22402	protein_coding	Ccn4	cellular communication network factor 4 [Source:MGI Symbol;Acc:MGI:1197008]
ENSMUSG00000005125	3209.19	-1.46297	-0.548903	0.378891	-1.44871	0.147419	0.480229	2815.7	2396.13	2856.95	4767.99	15	66801167	66841489	-1	17988	protein_coding	Ndrg1	N-myc downstream regulated gene 1 [Source:MGI Symbol;Acc:MGI:1341799]
ENSMUSG00000005131	8.91429	-2.96134	-1.56625	1.08454	-1.44417	0.148692		4.30041	4.69277	13.071	13.5929	9	53313625	53345702	1	75311	protein_coding	4930550C14Rik	RIKEN cDNA 4930550C14 gene [Source:MGI Symbol;Acc:MGI:1922561]
ENSMUSG00000005142	2812.64	1.27077	0.345701	0.102355	3.37746	0.000731597	0.0101664	3266.16	3030.59	2531.11	2422.68	8	85809899	85824911	1	17159	protein_coding	Man2b1	mannosidase 2, alpha B1 [Source:MGI Symbol;Acc:MGI:107286]
ENSMUSG00000005150	840.697	1.0862	0.119289	0.140311	0.85018	0.395225	0.770689	931.039	820.297	809.469	801.984	8	85801664	85807935	-1	67836	protein_coding	Wdr83	WD repeat domain containing 83 [Source:MGI Symbol;Acc:MGI:1915086]
ENSMUSG00000005161	3049.69	1.08852	0.122367	0.108236	1.13056	0.25824	0.645355	3241.44	3116	2724.37	3116.97	8	85696216	85701463	1	21672	protein_coding	Prdx2	peroxiredoxin 2 [Source:MGI Symbol;Acc:MGI:109486]
ENSMUSG00000005198	14036.4	-1.00378	-0.00543612	0.0829199	-0.0655587	0.947729	0.989374	13790.3	14229.4	14274.5	13851.2	11	69624823	69649463	-1	20020	protein_coding	Polr2a	polymerase (RNA) II (DNA directed) polypeptide A [Source:MGI Symbol;Acc:MGI:98086]
ENSMUSG00000005204	5466.65	-1.00204	-0.00293594	0.0889446	-0.0330086	0.973668	0.993095	5442.17	5480.22	5572.92	5371.31	11	69563941	69572910	-1	80886	protein_coding	Senp3	SUMO/sentrin specific peptidase 3 [Source:MGI Symbol;Acc:MGI:2158736]
ENSMUSG00000005220	7.48514	1.8076	0.854077	1.18464	0.720957	0.470936		11.8261	7.50844	7.46915	3.13683	5	72457368	72661816	-1	53419	protein_coding	Corin	corin, serine peptidase [Source:MGI Symbol;Acc:MGI:1349451]
ENSMUSG00000005225	44.117	2.28334	1.19115	0.600394	1.98395	0.0472619	0.240953	59.1307	63.8217	42.014	11.5017	6	54572096	54622824	1	231999	protein_coding	Plekha8	pleckstrin homology domain containing, family A (phosphoinositide binding specific) member 8 [Source:MGI Symbol;Acc:MGI:2681164]
ENSMUSG00000005233	508.759	-3.30558	-1.7249	0.176044	-9.79811	1.14716e-22	1.13237e-20	252.649	220.56	830.943	730.882	2	69024239	69036538	-1	66442	protein_coding	Spc25	SPC25, NDC80 kinetochore complex component, homolog (S. cerevisiae) [Source:MGI Symbol;Acc:MGI:1913692]
ENSMUSG00000005237	3.55163	-1.30378	-0.382696	1.65703	-0.230954	0.817351		4.30041	1.87711	2.80093	5.22806	11	69311635	69439936	-1	327954	protein_coding	Dnah2	dynein, axonemal, heavy chain 2 [Source:MGI Symbol;Acc:MGI:107731]
ENSMUSG00000005262	2027.26	-1.12393	-0.168551	0.108569	-1.55248	0.120547	0.426973	1893.26	1924.98	2235.14	2055.67	16	18630529	18654011	1	22230	protein_coding	Ufd1	ubiquitin recognition factor in ER-associated degradation 1 [Source:MGI Symbol;Acc:MGI:109353]
ENSMUSG00000005267	690.137	-1.42396	-0.509905	0.160215	-3.18264	0.0014594	0.0178534	593.457	545.3	731.977	889.815	11	62591182	62622731	-1	170740	protein_coding	Zfp287	zinc finger protein 287 [Source:MGI Symbol;Acc:MGI:2176561]
ENSMUSG00000005299	4060.76	-1.06798	-0.0948824	0.09318	-1.01827	0.30855	0.699885	3837.04	4017.01	4158.45	4230.54	5	33897017	33940161	-1	56384	protein_coding	Letm1	leucine zipper-EF-hand containing transmembrane protein 1 [Source:MGI Symbol;Acc:MGI:1932557]
ENSMUSG00000005312	11612.3	-1.02174	-0.0310229	0.0893418	-0.347238	0.728413	0.933112	11010.1	11963.8	11506.2	11969.1	13	58323970	58363467	-1	56085	protein_coding	Ubqln1	ubiquilin 1 [Source:MGI Symbol;Acc:MGI:1860276]
ENSMUSG00000005354	5356.66	1.0817	0.113304	0.094895	1.19399	0.23248	0.612527	5594.84	5538.41	4905.36	5388.04	15	77799247	77813206	-1	56551	protein_coding	Txn2	thioredoxin 2 [Source:MGI Symbol;Acc:MGI:1929468]
ENSMUSG00000005362	1735.27	-1.01868	-0.0267078	0.109421	-0.244083	0.807166	0.957067	1696.51	1741.96	1788.86	1713.76	6	106757162	106777038	-1	58799	protein_coding	Crbn	cereblon [Source:MGI Symbol;Acc:MGI:1913277]
ENSMUSG00000005364	8.60181	-1.69001	-0.757034	1.08955	-0.694812	0.487173		4.30041	8.44699	11.2037	10.4561	6	106687318	106725998	-1	16192	protein_coding	Il5ra	interleukin 5 receptor, alpha [Source:MGI Symbol;Acc:MGI:96558]
ENSMUSG00000005370	8043.78	1.11511	0.157192	0.0850675	1.84785	0.064624	0.296558	8411.61	8551.17	7517.7	7694.66	17	88282490	88298320	1	17688	protein_coding	Msh6	mutS homolog 6 [Source:MGI Symbol;Acc:MGI:1343961]
ENSMUSG00000005371	2941.58	1.01277	0.0183116	0.104556	0.175136	0.860973	0.969541	3059.74	2861.65	3052.08	2792.83	17	88298287	88372719	-1	225055	protein_coding	Fbxo11	F-box protein 11 [Source:MGI Symbol;Acc:MGI:2147134]
ENSMUSG00000005374	3206.74	-1.06366	-0.0890431	0.150029	-0.593507	0.552842	0.867471	3296.27	2918.9	2743.04	3868.76	5	135178511	135194614	1	27368	protein_coding	Tbl2	transducin (beta)-like 2 [Source:MGI Symbol;Acc:MGI:1351652]
ENSMUSG00000005378	1592.19	-1.09585	-0.132054	0.120772	-1.09341	0.274212	0.663897	1523.42	1514.83	1549.85	1780.68	5	135081811	135093813	-1	66138	protein_coding	Bud23	BUD23, rRNA methyltransferase and ribosome maturation factor [Source:MGI Symbol;Acc:MGI:1913388]
ENSMUSG00000005397	3.26346	1.19579	0.257969	1.6922	0.152446	0.878835		4.30041	2.81566	2.80093	3.13683	13	13612136	13686854	1	18073	protein_coding	Nid1	nidogen 1 [Source:MGI Symbol;Acc:MGI:97342]
ENSMUSG00000005410	6080.39	-1.65152	-0.723796	0.0898667	-8.05411	8.00598e-16	6.12779e-14	4469.2	4703.1	7695.09	7454.16	8	75836197	75855067	1	17218	protein_coding	Mcm5	minichromosome maintenance complex component 5 [Source:MGI Symbol;Acc:MGI:103197]
ENSMUSG00000005413	1114.7	-1.38421	-0.46906	0.181023	-2.59116	0.00956537	0.077701	961.142	908.521	1027.01	1562.14	8	75820249	75827217	1	15368	protein_coding	Hmox1	heme oxygenase 1 [Source:MGI Symbol;Acc:MGI:96163]
ENSMUSG00000005417	3631.01	1.02064	0.0294799	0.0958997	0.307403	0.758537	0.942727	3688.68	3647.22	3482.49	3705.65	11	59552131	59671686	1	26936	protein_coding	Mprip	myosin phosphatase Rho interacting protein [Source:MGI Symbol;Acc:MGI:1349438]
ENSMUSG00000005442	7875.76	1.01087	0.0156018	0.0959426	0.162616	0.870821	0.972443	8092.3	7744.01	7390.72	8276.02	7	24967129	24993584	1	71722	protein_coding	Cic	capicua transcriptional repressor [Source:MGI Symbol;Acc:MGI:1918972]
ENSMUSG00000005447	1402.79	-1.0295	-0.0419486	0.145658	-0.287994	0.773351	0.947776	1443.86	1320.55	1241.75	1605.01	7	24994474	24997411	-1	18476	protein_coding	Pafah1b3	platelet-activating factor acetylhydrolase, isoform 1b, subunit 3 [Source:MGI Symbol;Acc:MGI:108414]
ENSMUSG00000005465	125.276	1.12454	0.169341	0.297282	0.569629	0.568929	0.87344	121.487	143.599	115.772	120.245	8	84756923	84769218	-1	50931	protein_coding	Il27ra	interleukin 27 receptor, alpha [Source:MGI Symbol;Acc:MGI:1355318]
ENSMUSG00000005469	2065.14	1.17827	0.236672	0.114596	2.06527	0.0388973	0.213718	2273.84	2195.28	2022.27	1769.17	8	84699622	84723072	1	18747	protein_coding	Prkaca	protein kinase, cAMP dependent, catalytic, alpha [Source:MGI Symbol;Acc:MGI:97592]
ENSMUSG00000005470	1815.3	-2.59488	-1.37567	0.112044	-12.278	1.18935e-34	1.60596e-32	970.818	1048.37	2577.79	2664.22	8	84682136	84696826	1	66929	protein_coding	Asf1b	anti-silencing function 1B histone chaperone [Source:MGI Symbol;Acc:MGI:1914179]
ENSMUSG00000005474	32072.2	1.02369	0.0337724	0.105822	0.319144	0.749618	0.940442	32454.1	32442.1	34846.4	28546.2	5	136722000	136729948	1	59310	protein_coding	Myl10	myosin, light chain 10, regulatory [Source:MGI Symbol;Acc:MGI:1891705]
ENSMUSG00000005481	8065.64	-1.03791	-0.0536752	0.0917217	-0.585196	0.558416	0.869897	7598.83	8232.06	8423.33	8008.34	8	84441806	84453521	1	68278	protein_coding	Ddx39a	DEAD box helicase 39a [Source:MGI Symbol;Acc:MGI:1915528]
ENSMUSG00000005483	2573.16	1.08313	0.115205	0.120456	0.956406	0.338867	0.728547	2600.67	2749.96	2237.01	2705	8	84334822	84339282	1	81489	protein_coding	Dnajb1	DnaJ heat shock protein family (Hsp40) member B1 [Source:MGI Symbol;Acc:MGI:1931874]
ENSMUSG00000005493	9.5918	-2.4431	-1.28872	1.07121	-1.20305	0.228957	0.608209	6.45062	4.69277	8.40279	18.821	3	153562786	153611775	-1	55993	protein_coding	Msh4	mutS homolog 4 [Source:MGI Symbol;Acc:MGI:1860077]
ENSMUSG00000005501	514.566	-1.12904	-0.175101	0.165258	-1.05956	0.289345	0.679896	506.374	460.83	571.39	519.669	1	87872841	87936273	-1	227334	protein_coding	Usp40	ubiquitin specific peptidase 40 [Source:MGI Symbol;Acc:MGI:2443184]
ENSMUSG00000005514	6989.14	-1.4514	-0.537449	0.283703	-1.8944	0.0581713	0.276216	5635.69	5768.36	6648.48	9904.03	5	135698887	135764180	1	18984	protein_coding	Por	P450 (cytochrome) oxidoreductase [Source:MGI Symbol;Acc:MGI:97744]
ENSMUSG00000005533	40.9929	2.82199	1.49671	0.53439	2.80079	0.00509781	0.0488714	60.2058	61.006	27.0757	15.6842	7	67602575	67883416	1	16001	protein_coding	Igf1r	insulin-like growth factor I receptor [Source:MGI Symbol;Acc:MGI:96433]
ENSMUSG00000005534	1082.45	1.08407	0.116456	0.130414	0.892972	0.371872	0.752099	1192.29	1060.57	1060.62	1016.33	8	3172061	3329617	-1	16337	protein_coding	Insr	insulin receptor [Source:MGI Symbol;Acc:MGI:96575]
ENSMUSG00000005540	33.7287	1.08858	0.122444	0.58864	0.208012	0.835219	0.963476	45.1543	25.341	38.2794	26.1403	8	3731737	3744175	-1	14128	protein_coding	Fcer2a	Fc receptor, IgE, low affinity II, alpha polypeptide [Source:MGI Symbol;Acc:MGI:95497]
ENSMUSG00000005553	67.7225	1.06481	0.0905994	0.437463	0.207102	0.83593	0.963476	79.5576	60.0675	47.6158	83.6489	7	30411634	30424959	1	11944	protein_coding	Atp4a	ATPase, H+/K+ exchanging, gastric, alpha polypeptide [Source:MGI Symbol;Acc:MGI:88113]
ENSMUSG00000005566	22966.4	1.06656	0.0929639	0.0825173	1.1266	0.259912	0.647045	23038.4	24373.3	22287	22167	7	12733041	12764962	1	21849	protein_coding	Trim28	tripartite motif-containing 28 [Source:MGI Symbol;Acc:MGI:109274]
ENSMUSG00000005575	4629.83	-1.10785	-0.147763	0.0939154	-1.57336	0.115635	0.417822	4409	4376.48	4688.76	5045.08	7	12769047	12772202	-1	22192	protein_coding	Ube2m	ubiquitin-conjugating enzyme E2M [Source:MGI Symbol;Acc:MGI:108278]
ENSMUSG00000005580	48.6961	1.0585	0.0820181	0.478648	0.171354	0.863946	0.970424	56.9805	43.1735	39.213	55.4174	16	4105393	4238362	-1	11515	protein_coding	Adcy9	adenylate cyclase 9 [Source:MGI Symbol;Acc:MGI:108450]
ENSMUSG00000005583	4055.29	1.16349	0.218453	0.141567	1.54311	0.122805	0.431339	4372.44	4352.08	4371.32	3125.33	13	83652153	83815199	1	17260	protein_coding	Mef2c	myocyte enhancer factor 2C [Source:MGI Symbol;Acc:MGI:99458]
ENSMUSG00000005609	4153.03	1.0686	0.0957152	0.0916385	1.04449	0.29626	0.686144	4243.43	4338	4051.08	3979.6	7	110628158	110655584	1	22083	protein_coding	Ctr9	CTR9 homolog, Paf1/RNA polymerase II complex component [Source:MGI Symbol;Acc:MGI:109345]
ENSMUSG00000005610	40909.9	-1.08546	-0.118302	0.0914525	-1.29358	0.195809	0.564246	37286.7	41180	44208	40965	7	110666957	110682237	-1	13690	protein_coding	Eif4g2	eukaryotic translation initiation factor 4, gamma 2 [Source:MGI Symbol;Acc:MGI:109207]
ENSMUSG00000005611	334.927	1.3052	0.384273	0.21957	1.75012	0.080098	0.338583	420.365	338.818	329.576	250.947	7	110467473	110581668	-1	17540	protein_coding	Irag1	inositol 1,4,5-triphosphate receptor associated 1 [Source:MGI Symbol;Acc:MGI:1338023]
ENSMUSG00000005615	1224.2	-1.40509	-0.490658	0.133314	-3.68047	0.000232807	0.00391545	926.739	1108.43	1422.87	1438.76	16	32249739	32293888	1	13026	protein_coding	Pcyt1a	phosphate cytidylyltransferase 1, choline, alpha isoform [Source:MGI Symbol;Acc:MGI:88557]
ENSMUSG00000005621	4412.41	1.16734	0.223221	0.0917275	2.43352	0.0149527	0.108309	4704.65	4801.65	4149.11	3994.24	7	80643429	80694912	1	233410	protein_coding	Zfp592	zinc finger protein 592 [Source:MGI Symbol;Acc:MGI:2443541]
ENSMUSG00000005625	8517.98	-1.04148	-0.0586368	0.0896621	-0.653976	0.513128	0.846875	8296.57	8392.55	8339.3	9043.49	3	94940005	94949925	-1	19185	protein_coding	Psmd4	proteasome (prosome, macropain) 26S subunit, non-ATPase, 4 [Source:MGI Symbol;Acc:MGI:1201670]
ENSMUSG00000005628	152.158	1.02282	0.0325523	0.276453	0.117749	0.906266	0.97965	170.941	137.029	152.184	148.477	3	95031787	95036520	1	50874	protein_coding	Tmod4	tropomodulin 4 [Source:MGI Symbol;Acc:MGI:1355285]
ENSMUSG00000005640	386.872	1.69946	0.765078	0.237054	3.22744	0.00124903	0.0158628	536.476	437.366	221.274	352.371	3	87704258	87723408	1	23920	protein_coding	Insrr	insulin receptor-related receptor [Source:MGI Symbol;Acc:MGI:1346037]
ENSMUSG00000005656	6837.12	1.03953	0.0559354	0.0987001	0.566721	0.570904	0.874789	6647.36	7290.69	6387.06	7023.37	12	54793134	54842488	-1	72183	protein_coding	Snx6	sorting nexin 6 [Source:MGI Symbol;Acc:MGI:1919433]
ENSMUSG00000005667	3805.78	1.00393	0.00565292	0.100975	0.0559832	0.955355	0.990297	3944.55	3682.89	3964.25	3631.41	6	83282673	83302890	-1	17768	protein_coding	Mthfd2	methylenetetrahydrofolate dehydrogenase (NAD+ dependent), methenyltetrahydrofolate cyclohydrolase [Source:MGI Symbol;Acc:MGI:1338850]
ENSMUSG00000005674	133.538	1.01319	0.0189103	0.288152	0.0656262	0.947675	0.989374	129.012	139.845	141.914	123.382	1	171043580	171050083	-1	641376	protein_coding	Tomm40l	translocase of outer mitochondrial membrane 40-like [Source:MGI Symbol;Acc:MGI:3589112]
ENSMUSG00000005682	1798.95	-1.07832	-0.108786	0.117823	-0.9233	0.355851	0.740462	1718.01	1744.77	1995.2	1737.81	10	128139204	128157227	1	103135	protein_coding	Pan2	PAN2 poly(A) specific ribonuclease subunit [Source:MGI Symbol;Acc:MGI:1918984]
ENSMUSG00000005683	11164.3	1.00052	0.000755813	0.0835683	0.00904425	0.992784	0.998574	10974.7	11359.3	11077.7	11245.6	10	128173603	128198348	1	12974	protein_coding	Cs	citrate synthase [Source:MGI Symbol;Acc:MGI:88529]
ENSMUSG00000005686	368.536	-1.00701	-0.0100747	0.19698	-0.0511457	0.959209	0.99133	407.464	327.556	384.661	354.462	7	110367413	110411612	1	11717	protein_coding	Ampd3	adenosine monophosphate deaminase 3 [Source:MGI Symbol;Acc:MGI:1096344]
ENSMUSG00000005687	2817.94	1.0586	0.08216	0.1027	0.8	0.423711	0.790147	2922.13	2874.79	2859.75	2615.07	3	103078971	103086482	1	68183	protein_coding	Bcas2	breast carcinoma amplified sequence 2 [Source:MGI Symbol;Acc:MGI:1915433]
ENSMUSG00000005698	5099.97	1.02251	0.0321123	0.0947172	0.339034	0.734584	0.934777	5084.16	5229.63	5256.41	4829.68	8	106363200	106409554	1	13018	protein_coding	Ctcf	CCCTC-binding factor [Source:MGI Symbol;Acc:MGI:109447]
ENSMUSG00000005699	248.14	1.08453	0.117064	0.233085	0.502235	0.615502	0.895245	291.353	225.253	225.008	250.947	8	106427780	106430128	1	56513	protein_coding	Pard6a	par-6 family cell polarity regulator alpha [Source:MGI Symbol;Acc:MGI:1927223]
ENSMUSG00000005705	7.98337	-1.24863	-0.320345	1.11037	-0.288503	0.772961		8.60082	5.63133	9.33644	8.36489	8	106293330	106364025	-1	11604	protein_coding	Agrp	agouti related neuropeptide [Source:MGI Symbol;Acc:MGI:892013]
ENSMUSG00000005718	627.391	1.29092	0.368402	0.153181	2.405	0.0161723	0.115104	747.197	667.312	555.518	539.536	16	4362525	4377718	-1	83383	protein_coding	Tfap4	transcription factor AP4 [Source:MGI Symbol;Acc:MGI:103239]
ENSMUSG00000005763	35.3492	-3.8105	-1.92998	0.690547	-2.79485	0.00519231	0.049624	17.2016	12.2012	25.2084	86.7858	1	165616250	165704846	1	12503	protein_coding	Cd247	CD247 antigen [Source:MGI Symbol;Acc:MGI:88334]
ENSMUSG00000005774	667.894	1.23621	0.305929	0.144928	2.11091	0.0347804	0.197544	751.497	725.503	597.532	597.044	3	94861386	94868872	1	53970	protein_coding	Rfx5	regulatory factor X, 5 (influences HLA class II expression) [Source:MGI Symbol;Acc:MGI:1858421]
ENSMUSG00000005779	7086.83	-1.0135	-0.0193491	0.0892199	-0.21687	0.828309	0.961693	6965.59	7112.37	6906.16	7363.2	3	94791404	94794272	-1	19172	protein_coding	Psmb4	proteasome (prosome, macropain) subunit, beta type 4 [Source:MGI Symbol;Acc:MGI:1098257]
ENSMUSG00000005800	15060.3	-2.10494	-1.07378	0.375738	-2.85779	0.004266	0.0427287	9412.53	9989.04	15133.4	25706.4	9	7558457	7568486	1	17394	protein_coding	Mmp8	matrix metallopeptidase 8 [Source:MGI Symbol;Acc:MGI:1202395]
ENSMUSG00000005804	1591.3	1.00196	0.00282129	0.111523	0.0252977	0.979817	0.994858	1629.86	1556.12	1590.93	1588.28	2	122580423	122591395	1	18457	protein_coding	Bloc1s6	biogenesis of lysosomal organelles complex-1, subunit 6, pallidin [Source:MGI Symbol;Acc:MGI:1927580]
ENSMUSG00000005813	3869.18	-1.06305	-0.0882144	0.0977448	-0.902497	0.366793	0.748703	3585.47	3915.65	3969.85	4005.74	3	138164717	138195276	-1	75624	protein_coding	Metap1	methionyl aminopeptidase 1 [Source:MGI Symbol;Acc:MGI:1922874]
ENSMUSG00000005823	2316.62	1.07626	0.106027	0.109418	0.96901	0.33254	0.723241	2418.98	2383.93	2102.57	2360.99	17	57541635	57555446	-1	78308	protein_coding	Gpr108	G protein-coupled receptor 108 [Source:MGI Symbol;Acc:MGI:1925558]
ENSMUSG00000005824	62.3173	-3.7297	-1.89906	0.507643	-3.74093	0.000183339	0.00321979	31.178	21.5868	61.6205	134.884	17	57496492	57501177	-1	50930	protein_coding	Tnfsf14	tumor necrosis factor (ligand) superfamily, member 14 [Source:MGI Symbol;Acc:MGI:1355317]
ENSMUSG00000005846	15829.7	1.08784	0.121471	0.0967926	1.25496	0.209493	0.582679	15795.4	17196.2	16048.4	14278.9	16	11010834	11021195	-1	66409	protein_coding	Rsl1d1	ribosomal L1 domain containing 1 [Source:MGI Symbol;Acc:MGI:1913659]
ENSMUSG00000005871	2755.05	1.03564	0.0505243	0.0984968	0.512954	0.607984	0.891235	2842.57	2764.04	2673.02	2740.55	18	34353977	34455605	1	11789	protein_coding	Apc	APC, WNT signaling pathway regulator [Source:MGI Symbol;Acc:MGI:88039]
ENSMUSG00000005873	4453.44	-1.19149	-0.252763	0.108302	-2.33387	0.0196023	0.131537	4026.26	4101.48	4442.28	5243.74	18	34477938	34507123	-1	13476	protein_coding	Reep5	receptor accessory protein 5 [Source:MGI Symbol;Acc:MGI:1270152]
ENSMUSG00000005881	2072.12	1.01908	0.0272687	0.108362	0.251645	0.801315	0.95636	2177.08	2006.63	2016.67	2088.09	2	155849965	155860199	1	66366	protein_coding	Ergic3	ERGIC and golgi 3 [Source:MGI Symbol;Acc:MGI:1913616]
ENSMUSG00000005882	2294.25	1.09324	0.128615	0.107925	1.19171	0.233376	0.61369	2282.44	2509.69	2148.31	2236.56	2	155688814	155772230	-1	56046	protein_coding	Uqcc1	ubiquinol-cytochrome c reductase complex assembly factor 1 [Source:MGI Symbol;Acc:MGI:1929472]
ENSMUSG00000005883	41.638	1.38475	0.469627	0.500059	0.939143	0.347657	0.734576	52.6801	44.1121	37.3457	32.414	2	172819493	172835369	1	26972	protein_coding	Spo11	SPO11 initiator of meiotic double stranded breaks [Source:MGI Symbol;Acc:MGI:1349669]
ENSMUSG00000005886	2867.97	1.06974	0.0972581	0.0984694	0.987698	0.323301	0.714093	2922.13	3007.13	2826.14	2716.5	1	13209329	13444307	-1	17978	protein_coding	Ncoa2	nuclear receptor coactivator 2 [Source:MGI Symbol;Acc:MGI:1276533]
ENSMUSG00000005893	701.347	1.04025	0.0569303	0.146803	0.387801	0.698163	0.922975	686.991	743.335	714.237	660.826	6	92068371	92151275	1	22026	protein_coding	Nr2c2	nuclear receptor subfamily 2, group C, member 2 [Source:MGI Symbol;Acc:MGI:1352466]
ENSMUSG00000005897	857.954	1.01063	0.0152525	0.133302	0.11442	0.908905	0.9799	880.509	844.699	861.753	844.854	10	93983885	94033073	1	22025	protein_coding	Nr2c1	nuclear receptor subfamily 2, group C, member 1 [Source:MGI Symbol;Acc:MGI:1352465]
ENSMUSG00000005899	3330.98	1.04492	0.0633922	0.098199	0.645548	0.518572	0.849819	3294.12	3513.95	3316.3	3199.57	16	17437218	17462692	1	77626	protein_coding	Smpd4	sphingomyelin phosphodiesterase 4 [Source:MGI Symbol;Acc:MGI:1924876]
ENSMUSG00000005907	571.032	-1.10924	-0.149571	0.156808	-0.953852	0.340159	0.729138	539.702	543.423	631.143	569.858	5	3646066	3687232	1	71382	protein_coding	Pex1	peroxisomal biogenesis factor 1 [Source:MGI Symbol;Acc:MGI:1918632]
ENSMUSG00000005936	3450.59	1.01641	0.0234792	0.095363	0.246209	0.80552	0.957067	3401.63	3555.24	3392.86	3452.61	17	29170924	29188523	1	66989	protein_coding	Kctd20	potassium channel tetramerisation domain containing 20 [Source:MGI Symbol;Acc:MGI:1914239]
ENSMUSG00000005947	33.2165	-1.86547	-0.899541	0.563524	-1.59628	0.110427	0.408196	25.8025	20.6482	46.6822	39.7332	11	72981409	73038272	1	16407	protein_coding	Itgae	integrin alpha E, epithelial-associated [Source:MGI Symbol;Acc:MGI:1298377]
ENSMUSG00000005949	747.799	1.06763	0.0944077	0.139469	0.67691	0.498463	0.838072	756.873	787.447	717.038	729.837	11	73074422	73089868	-1	83429	protein_coding	Ctns	cystinosis, nephropathic [Source:MGI Symbol;Acc:MGI:1932872]
ENSMUSG00000005950	19.4471	-2.67151	-1.41766	0.743111	-1.90773	0.056426	0.271493	11.8261	9.38555	25.2084	31.3683	11	73051247	73063511	1	94045	protein_coding	P2rx5	purinergic receptor P2X, ligand-gated ion channel, 5 [Source:MGI Symbol;Acc:MGI:2137026]
ENSMUSG00000005951	203.126	1.2438	0.314758	0.255247	1.23315	0.21752	0.592008	215.021	235.577	208.203	153.705	11	73090286	73115337	1	74637	protein_coding	Shpk	sedoheptulokinase [Source:MGI Symbol;Acc:MGI:1921887]
ENSMUSG00000005952	3.58304	-12.9462	-3.69445	2.16985	-1.70263	0.0886374		1.0751	0	2.80093	10.4561	11	73125118	73152068	1	193034	protein_coding	Trpv1	transient receptor potential cation channel, subfamily V, member 1 [Source:MGI Symbol;Acc:MGI:1341787]
ENSMUSG00000005968	384.507	1.21631	0.282517	0.182626	1.54697	0.121872	0.428798	406.389	437.366	331.443	362.827	3	94520064	94566179	-1	22156	protein_coding	Tuft1	tuftelin 1 [Source:MGI Symbol;Acc:MGI:109572]
ENSMUSG00000005973	804.678	1.13307	0.18024	0.140561	1.28228	0.199743	0.571213	902.011	808.095	751.583	757.023	2	105216636	105229664	-1	19672	protein_coding	Rcn1	reticulocalbin 1 [Source:MGI Symbol;Acc:MGI:104559]
ENSMUSG00000005980	438.835	1.14574	0.196276	0.194662	1.00829	0.313313	0.704216	409.614	527.468	439.746	378.511	16	3854806	3857888	1	13419	protein_coding	Dnase1	deoxyribonuclease I [Source:MGI Symbol;Acc:MGI:103157]
ENSMUSG00000005981	4522.8	1.16212	0.216765	0.0917087	2.36363	0.0180971	0.124113	4807.86	4916.15	4270.49	4096.71	16	3857835	3895691	-1	68015	protein_coding	Trap1	TNF receptor-associated protein 1 [Source:MGI Symbol;Acc:MGI:1915265]
ENSMUSG00000005982	1473.7	1.03357	0.0476418	0.121453	0.392264	0.694863	0.921313	1436.34	1558.94	1377.12	1522.41	16	3690239	3722634	1	74763	protein_coding	Naa60	N(alpha)-acetyltransferase 60, NatF catalytic subunit [Source:MGI Symbol;Acc:MGI:1922013]
ENSMUSG00000005983	85.2743	-1.04059	-0.0573982	0.375955	-0.152673	0.878656	0.97381	91.3838	76.0229	103.634	70.056	16	3713043	3726553	-1	73261	protein_coding	1700037C18Rik	RIKEN cDNA 1700037C18 gene [Source:MGI Symbol;Acc:MGI:1920511]
ENSMUSG00000005983	85.2743	-1.04059	-0.0573982	0.375955	-0.152673	0.878656	0.97381	91.3838	76.0229	103.634	70.056	16	3713043	3726553	-1	105246059	protein_coding	1700037C18Rik	RIKEN cDNA 1700037C18 gene [Source:MGI Symbol;Acc:MGI:1920511]
ENSMUSG00000005986	350.806	1.23677	0.306578	0.208681	1.46912	0.1418	0.470168	416.065	360.405	353.851	272.905	19	4320208	4333165	-1	68423	protein_coding	Ankrd13d	ankyrin repeat domain 13 family, member D [Source:MGI Symbol;Acc:MGI:1915673]
ENSMUSG00000006005	17807.2	1.03419	0.0485035	0.105591	0.459353	0.64598	0.906752	17657.5	18556.2	19132.2	15882.8	1	150268589	150325686	1	108989	protein_coding	Tpr	translocated promoter region, nuclear basket protein [Source:MGI Symbol;Acc:MGI:1922066]
ENSMUSG00000006010	2376.41	-1.0082	-0.0117775	0.1007	-0.116957	0.906894	0.97965	2352.33	2381.11	2406	2366.22	1	150237056	150268831	-1	226499	protein_coding	Odr4	odr4 GPCR localization factor homolog [Source:MGI Symbol;Acc:MGI:2385108]
ENSMUSG00000006014	11.5081	2.01869	1.01342	1.05038	0.964808	0.334641	0.725281	13.9763	16.894	13.071	2.09122	1	150325163	150341916	-1	96875	protein_coding	Prg4	proteoglycan 4 (megakaryocyte stimulating factor, articular superficial zone protein) [Source:MGI Symbol;Acc:MGI:1891344]
ENSMUSG00000006019	676.779	1.16977	0.226224	0.178208	1.26944	0.204284	0.576937	789.126	670.128	536.845	711.016	7	15931072	15955962	-1	71723	protein_coding	Dhx34	DEAH (Asp-Glu-Ala-His) box polypeptide 34 [Source:MGI Symbol;Acc:MGI:1918973]
ENSMUSG00000006021	580.407	1.04421	0.0624131	0.159388	0.391579	0.69537	0.921662	635.386	550.932	568.589	566.721	7	15853820	15861441	1	70394	protein_coding	Kptn	kaptin [Source:MGI Symbol;Acc:MGI:1890380]
ENSMUSG00000006024	5260.22	-1.02989	-0.042488	0.0935938	-0.453961	0.649857	0.907958	5131.47	5233.38	5123.84	5552.2	7	15832383	15851900	1	108124	protein_coding	Napa	N-ethylmaleimide sensitive fusion protein attachment protein alpha [Source:MGI Symbol;Acc:MGI:104563]
ENSMUSG00000006050	3300.51	-1.02959	-0.0420688	0.105992	-0.396904	0.691438	0.919811	3404.85	3100.05	3191.19	3505.94	18	36799734	36803868	-1	24068	protein_coding	Sra1	steroid receptor RNA activator 1 [Source:MGI Symbol;Acc:MGI:1344414]
ENSMUSG00000006057	3419.86	1.07544	0.104932	0.102096	1.02778	0.304051	0.695909	3476.88	3610.62	3126.77	3465.16	11	95959678	95966496	-1	11951	protein_coding	Atp5g1	ATP synthase, H+ transporting, mitochondrial F0 complex, subunit C1 (subunit 9) [Source:MGI Symbol;Acc:MGI:107653]
ENSMUSG00000006058	2787.99	-1.02512	-0.0357978	0.0976112	-0.366739	0.713814	0.928914	2727.54	2779.06	2806.53	2838.84	11	95925711	95938256	1	27681	protein_coding	Snf8	SNF8, ESCRT-II complex subunit, homolog (S. cerevisiae) [Source:MGI Symbol;Acc:MGI:1343161]
ENSMUSG00000006095	1644.56	-1.10475	-0.143724	0.121577	-1.18216	0.237143	0.617918	1554.6	1570.2	1597.46	1855.96	7	29923556	29931697	-1	66411	protein_coding	Tbcb	tubulin folding cofactor B [Source:MGI Symbol;Acc:MGI:1913661]
ENSMUSG00000006127	1725.2	1.30048	0.379048	0.112639	3.36515	0.000765028	0.0105388	1887.88	2013.2	1544.25	1455.49	11	75521814	75539697	1	19062	protein_coding	Inpp5k	inositol polyphosphate 5-phosphatase K [Source:MGI Symbol;Acc:MGI:1194899]
ENSMUSG00000006134	4340.24	-1.04706	-0.0663383	0.100304	-0.661372	0.508374	0.843147	4001.53	4478.78	4514.17	4366.47	16	17269851	17305298	1	12929	protein_coding	Crkl	v-crk avian sarcoma virus CT10 oncogene homolog-like [Source:MGI Symbol;Acc:MGI:104686]
ENSMUSG00000006143	4.70543	2.17608	1.12173	1.44906	0.774109	0.438866		5.37552	7.50844	2.80093	3.13683	5	136083346	136093180	1	69665	protein_coding	Upk3bl	uroplakin 3B-like [Source:MGI Symbol;Acc:MGI:1916915]
ENSMUSG00000006154	12.7734	-1.98338	-0.98796	0.919241	-1.07476	0.282484	0.672186	9.67593	7.50844	22.4074	11.5017	7	4463673	4483486	1	67425	protein_coding	Eps8l1	EPS8-like 1 [Source:MGI Symbol;Acc:MGI:1914675]
ENSMUSG00000006169	11828.3	-1.06545	-0.0914568	0.0866682	-1.05525	0.29131	0.681629	11039.2	11867.1	12178.4	12228.4	11	45742791	45801452	1	216705	protein_coding	Clint1	clathrin interactor 1 [Source:MGI Symbol;Acc:MGI:2144243]
ENSMUSG00000006179	14.7415	1.0232	0.0330933	0.896608	0.0369095	0.970557	0.992185	21.5021	8.44699	19.6065	9.4105	13	22186343	22193912	-1	54373	protein_coding	Prss16	protease, serine 16 (thymus) [Source:MGI Symbol;Acc:MGI:1859181]
ENSMUSG00000006191	510.271	1.30507	0.384128	0.161511	2.37834	0.0173909	0.120653	584.856	570.641	427.609	457.978	13	29375729	30039657	-1	68916	protein_coding	Cdkal1	CDK5 regulatory subunit associated protein 1-like 1 [Source:MGI Symbol;Acc:MGI:1921765]
ENSMUSG00000006215	1665.52	-1.04866	-0.0685471	0.109496	-0.626025	0.531299	0.856768	1609.43	1642.47	1722.57	1687.62	4	141171965	141195241	1	22642	protein_coding	Zbtb17	zinc finger and BTB domain containing 17 [Source:MGI Symbol;Acc:MGI:107410]
ENSMUSG00000006219	10.9529	-10.0713	-3.33217	1.16875	-2.85106	0.00435741	0.0431308	1.0751	2.81566	15.8719	24.0491	4	141303373	141333407	-1	74202	protein_coding	Fblim1	filamin binding LIM protein 1 [Source:MGI Symbol;Acc:MGI:1921452]
ENSMUSG00000006235	5.79992	1.89558	0.922639	1.3154	0.701412	0.483046		8.60082	6.56988	2.80093	5.22806	9	21870193	21874802	-1	13857	protein_coding	Epor	erythropoietin receptor [Source:MGI Symbol;Acc:MGI:95408]
ENSMUSG00000006241	34.5021	1.53751	0.620596	0.546241	1.13612	0.255905	0.643209	45.1543	38.4807	26.142	28.2315	9	21838767	21847168	1	67119	protein_coding	Ccdc159	coiled-coil domain containing 159 [Source:MGI Symbol;Acc:MGI:1914369]
ENSMUSG00000006262	1649.56	-1.18562	-0.245645	0.114353	-2.14812	0.0317042	0.184739	1546	1473.53	1860.75	1717.94	5	88868714	88912079	1	68473	protein_coding	Mob1b	MOB kinase activator 1B [Source:MGI Symbol;Acc:MGI:1915723]
ENSMUSG00000006273	9946.69	-1.21708	-0.283429	0.114649	-2.47214	0.0134309	0.0997655	8541.69	9402.44	9792.99	12049.6	8	69541298	69566363	1	11966	protein_coding	Atp6v1b2	ATPase, H+ transporting, lysosomal V1 subunit B2 [Source:MGI Symbol;Acc:MGI:109618]
ENSMUSG00000006276	4607.92	1.02217	0.0316393	0.0899953	0.351566	0.725164	0.931963	4630.47	4686.2	4521.64	4593.37	8	73094843	73175304	-1	13859	protein_coding	Eps15l1	epidermal growth factor receptor pathway substrate 15-like 1 [Source:MGI Symbol;Acc:MGI:104582]
ENSMUSG00000006281	3476.5	-1.09889	-0.136048	0.102876	-1.32245	0.186018	0.548861	3469.36	3156.36	3516.1	3764.2	14	51061516	51108017	-1	21745	protein_coding	Tep1	telomerase associated protein 1 [Source:MGI Symbol;Acc:MGI:109573]
ENSMUSG00000006288	1888.36	1.11807	0.161011	0.114316	1.40847	0.158992	0.502128	2113.65	1874.29	1796.33	1769.17	14	51002872	51022976	-1	219022	protein_coding	Ttc5	tetratricopeptide repeat domain 5 [Source:MGI Symbol;Acc:MGI:2683584]
ENSMUSG00000006289	1966.32	1.26898	0.343673	0.106424	3.22928	0.00124102	0.015775	2254.49	2144.6	1726.31	1739.9	14	51143935	51162350	-1	66246	protein_coding	Osgep	O-sialoglycoprotein endopeptidase [Source:MGI Symbol;Acc:MGI:1913496]
ENSMUSG00000006299	3757.15	-1.03649	-0.0517124	0.0938642	-0.550928	0.581683	0.878643	3623.1	3756.1	3777.52	3871.9	1	74318999	74323897	-1	227290	protein_coding	Aamp	angio-associated migratory protein [Source:MGI Symbol;Acc:MGI:107809]
ENSMUSG00000006301	2395.2	-1.01874	-0.0267812	0.10065	-0.266084	0.790175	0.953044	2375.98	2369.85	2388.26	2446.73	1	74327406	74344781	-1	69660	protein_coding	Tmbim1	transmembrane BAX inhibitor motif containing 1 [Source:MGI Symbol;Acc:MGI:1916910]
ENSMUSG00000006304	31189.6	-1.0546	-0.0766978	0.0879039	-0.872518	0.382926	0.760299	30229.7	30490.8	30400.4	33637.3	1	74275243	74307368	1	76709	protein_coding	Arpc2	actin related protein 2/3 complex, subunit 2 [Source:MGI Symbol;Acc:MGI:1923959]
ENSMUSG00000006307	6275.12	-1.06381	-0.0892358	0.0890486	-1.0021	0.316294	0.707334	6088.31	6074.33	6648.48	6289.35	7	30268283	30288151	-1	75410	protein_coding	Kmt2b	lysine (K)-specific methyltransferase 2B [Source:MGI Symbol;Acc:MGI:109565]
ENSMUSG00000006310	6053.4	1.10075	0.138487	0.125905	1.09993	0.271361	0.661132	6324.83	6361.52	4983.79	6543.44	7	30289106	30298334	-1	58206	protein_coding	Zbtb32	zinc finger and BTB domain containing 32 [Source:MGI Symbol;Acc:MGI:1891838]
ENSMUSG00000006311	3.71949	2.93036	1.55108	1.81299	0.855534	0.392255		6.45062	4.69277	3.73457	0	7	30333041	30335277	-1	14008	protein_coding	Etv2	ets variant 2 [Source:MGI Symbol;Acc:MGI:99253]
ENSMUSG00000006313	41.2684	1.0032	0.00460444	0.508835	0.009049	0.99278	0.998574	36.5535	45.9892	35.4785	47.0525	7	30302517	30312272	-1	109637	protein_coding	Upk1a	uroplakin 1A [Source:MGI Symbol;Acc:MGI:98911]
ENSMUSG00000006315	2312.79	1.10373	0.142389	0.107323	1.32673	0.184597	0.546799	2484.56	2368.91	2102.57	2295.12	7	30427126	30428965	-1	69804	protein_coding	Tmem147	transmembrane protein 147 [Source:MGI Symbol;Acc:MGI:1915011]
ENSMUSG00000006333	30952.2	1.11763	0.160442	0.0897335	1.78799	0.0737783	0.321653	34463.5	30880.3	28861.7	29603.4	7	3706992	3709896	1	76846	protein_coding	Rps9	ribosomal protein S9 [Source:MGI Symbol;Acc:MGI:1924096]
ENSMUSG00000006335	872.548	-1.01448	-0.0207463	0.13326	-0.155682	0.876284	0.973753	847.181	885.057	860.819	897.135	7	3623323	3632928	-1	69714	protein_coding	Tfpt	TCF3 (E2A) fusion partner [Source:MGI Symbol;Acc:MGI:1916964]
ENSMUSG00000006342	57.8254	-1.64283	-0.716186	0.429795	-1.66634	0.0956448	0.376036	46.2294	41.2964	65.355	78.4209	10	75472540	75479842	-1	71733	protein_coding	Susd2	sushi domain containing 2 [Source:MGI Symbol;Acc:MGI:1918983]
ENSMUSG00000006344	8.41483	-1.56506	-0.646218	1.09005	-0.592833	0.553293		7.52572	5.63133	12.1374	8.36489	10	75425174	75453034	1	23887	protein_coding	Ggt5	gamma-glutamyltransferase 5 [Source:MGI Symbol;Acc:MGI:1346063]
ENSMUSG00000006345	10.6782	1.13119	0.177842	1.01049	0.175996	0.860297	0.969454	16.1265	6.56988	7.46915	12.5473	10	75397438	75422034	1	14598	protein_coding	Ggt1	gamma-glutamyltransferase 1 [Source:MGI Symbol;Acc:MGI:95706]
ENSMUSG00000006356	78.9748	1.35835	0.441859	0.384086	1.15042	0.249973	0.635499	96.7593	85.4085	79.3597	54.3718	12	113103856	113109126	1	68337	protein_coding	Crip2	cysteine rich protein 2 [Source:MGI Symbol;Acc:MGI:1915587]
ENSMUSG00000006360	5238.45	1.47175	0.557533	0.0998673	5.58274	2.3676e-08	9.49227e-07	6358.16	6119.38	4494.56	3981.69	12	113109936	113117499	1	12925	protein_coding	Crip1	cysteine-rich protein 1 (intestinal) [Source:MGI Symbol;Acc:MGI:88501]
ENSMUSG00000006362	1286.69	1.4433	0.529369	0.141572	3.73923	0.000184585	0.00323373	1508.37	1532.66	1178.26	927.457	8	123351880	123425848	-1	12398	protein_coding	Cbfa2t3	CBFA2/RUNX1 translocation partner 3 [Source:MGI Symbol;Acc:MGI:1338013]
ENSMUSG00000006373	1690.84	-1.02283	-0.0325699	0.116803	-0.278845	0.780364	0.949532	1578.25	1764.48	1670.29	1750.35	X	35861859	35869732	1	53328	protein_coding	Pgrmc1	progesterone receptor membrane component 1 [Source:MGI Symbol;Acc:MGI:1858305]
ENSMUSG00000006378	110.939	-1.11885	-0.162019	0.32519	-0.498228	0.618324	0.896178	88.1585	121.074	119.506	115.017	15	78915074	78922553	1	26912	protein_coding	Gcat	glycine C-acetyltransferase (2-amino-3-ketobutyrate-coenzyme A ligase) [Source:MGI Symbol;Acc:MGI:1349389]
ENSMUSG00000006386	13.7861	-2.06707	-1.04758	0.865508	-1.21037	0.226137	0.604314	8.60082	9.38555	21.4738	15.6842	4	94627526	94763213	1	21687	protein_coding	Tek	TEK receptor tyrosine kinase [Source:MGI Symbol;Acc:MGI:98664]
ENSMUSG00000006390	5707.64	1.08486	0.11751	0.103405	1.13641	0.255785	0.643209	5819.53	6059.31	5074.35	5877.38	4	118285290	118290150	1	54325	protein_coding	Elovl1	elongation of very long chain fatty acids (FEN1/Elo2, SUR4/Elo3, yeast)-like 1 [Source:MGI Symbol;Acc:MGI:1858959]
ENSMUSG00000006392	2460.8	-1.05211	-0.0732851	0.107408	-0.682303	0.495047	0.835469	2371.68	2424.29	2388.26	2658.99	4	118266534	118272979	1	80509	protein_coding	Med8	mediator complex subunit 8 [Source:MGI Symbol;Acc:MGI:1915269]
ENSMUSG00000006395	418.87	1.07454	0.103722	0.20107	0.515851	0.605958	0.890095	494.547	373.545	373.457	433.929	4	118217187	118219941	1		polymorphic_pseudogene	Hyi	hydroxypyruvate isomerase (putative) [Source:MGI Symbol;Acc:MGI:1915430]
ENSMUSG00000006398	4101.17	-4.03209	-2.01153	0.132923	-15.133	9.8076e-52	2.12691e-49	1401.93	1856.46	6889.36	6256.94	4	118290098	118294549	-1	107995	protein_coding	Cdc20	cell division cycle 20 [Source:MGI Symbol;Acc:MGI:1859866]
ENSMUSG00000006403	7.88491	1.72256	0.78455	1.15338	0.680219	0.496366		9.67593	10.3241	8.40279	3.13683	1	171077990	171088206	1	240913	protein_coding	Adamts4	a disintegrin-like and metallopeptidase (reprolysin type) with thrombospondin type 1 motif, 4 [Source:MGI Symbol;Acc:MGI:1339949]
ENSMUSG00000006411	16.6257	1.48801	0.573384	0.781615	0.733588	0.4632	0.816877	17.2016	22.5253	12.1374	14.6386	1	171197667	171216166	1	71740	protein_coding	Nectin4	nectin cell adhesion molecule 4 [Source:MGI Symbol;Acc:MGI:1918990]
ENSMUSG00000006412	2601.83	-1.00784	-0.0112644	0.117334	-0.0960026	0.923519	0.985015	2521.12	2662.68	2836.41	2387.13	1	171173238	171186822	1	18637	protein_coding	Pfdn2	prefoldin 2 [Source:MGI Symbol;Acc:MGI:1276111]
ENSMUSG00000006418	7165.55	-1.04257	-0.0601451	0.101057	-0.59516	0.551737	0.866781	6849.48	7181.82	6803.46	7827.45	2	167334565	167358093	1	81018	protein_coding	Rnf114	ring finger protein 114 [Source:MGI Symbol;Acc:MGI:1933159]
ENSMUSG00000006423	1366.41	1.03881	0.0549339	0.118031	0.465419	0.641632	0.905735	1377.21	1407.83	1389.26	1291.33	X	36087390	36137764	-1	77644	protein_coding	C330007P06Rik	RIKEN cDNA C330007P06 gene [Source:MGI Symbol;Acc:MGI:1924894]
ENSMUSG00000006442	10415.3	-1.02369	-0.0337725	0.091582	-0.368768	0.7123	0.928914	9994.16	10591.6	10086.2	10989.4	4	148675960	148679450	1	20810	protein_coding	Srm	spermidine synthase [Source:MGI Symbol;Acc:MGI:102690]
ENSMUSG00000006445	1921.65	1.01136	0.0162951	0.111589	0.146028	0.883899	0.974831	1901.86	1962.52	1817.8	2004.44	4	141028551	141056695	1	13836	protein_coding	Epha2	Eph receptor A2 [Source:MGI Symbol;Acc:MGI:95278]
ENSMUSG00000006456	2049.91	-1.0578	-0.081068	0.106984	-0.757755	0.448597	0.806322	1921.21	2062.94	2096.03	2119.45	19	4850597	4861662	-1	56275	protein_coding	Rbm14	RNA binding motif protein 14 [Source:MGI Symbol;Acc:MGI:1929092]
ENSMUSG00000006457	11.9123	-2.20059	-1.13789	0.974036	-1.16822	0.242718	0.625951	6.45062	8.44699	23.3411	9.4105	19	4911244	4927937	-1	11474	protein_coding	Actn3	actinin alpha 3 [Source:MGI Symbol;Acc:MGI:99678]
ENSMUSG00000006462	11.1761	-1.33256	-0.414202	0.942651	-0.439401	0.660371	0.90993	10.751	8.44699	14.0047	11.5017	2	167533097	167571092	1		lncRNA	A530013C23Rik	RIKEN cDNA A530013C23 gene [Source:MGI Symbol;Acc:MGI:3041178]
ENSMUSG00000006463	1150.71	1.04855	0.068392	0.137307	0.498096	0.618417	0.896178	1186.91	1168.5	1016.74	1230.68	19	4928696	4935425	1	70605	protein_coding	Zdhhc24	zinc finger, DHHC domain containing 24 [Source:MGI Symbol;Acc:MGI:1917855]
ENSMUSG00000006464	180.327	1.1028	0.141172	0.24766	0.570025	0.568661	0.87344	184.918	193.342	173.658	169.389	19	4936906	4956656	-1	52028	protein_coding	Bbs1	Bardet-Biedl syndrome 1 (human) [Source:MGI Symbol;Acc:MGI:1277215]
ENSMUSG00000006471	683.439	-1.04327	-0.0611185	0.151863	-0.402458	0.687347	0.918284	631.086	706.732	731.977	663.963	2	25134833	25146034	-1	78797	protein_coding	Ndor1	NADPH dependent diflavin oxidoreductase 1 [Source:MGI Symbol;Acc:MGI:1926047]
ENSMUSG00000006476	672.643	1.17724	0.235409	0.158293	1.48717	0.136969	0.46009	793.426	661.681	596.598	638.869	2	24944367	24952893	1	56876	protein_coding	Nsmf	NMDA receptor synaptonuclear signaling and neuronal migration factor [Source:MGI Symbol;Acc:MGI:1861755]
ENSMUSG00000006494	8292.86	1.20801	0.272628	0.12698	2.14701	0.0317928	0.184905	9813.54	8334.36	6633.54	8389.99	2	71703568	71734202	1	228026	protein_coding	Pdk1	pyruvate dehydrogenase kinase, isoenzyme 1 [Source:MGI Symbol;Acc:MGI:1926119]
ENSMUSG00000006498	20704.2	-1.01313	-0.0188214	0.0829093	-0.227011	0.820415	0.960208	20075.4	21062.1	20505.6	21173.6	10	79690261	79700605	1	19205	protein_coding	Ptbp1	polypyrimidine tract binding protein 1 [Source:MGI Symbol;Acc:MGI:97791]
ENSMUSG00000006517	1848.29	1.26199	0.335696	0.127365	2.63569	0.00839654	0.0706939	2199.66	1924.98	1508.77	1759.76	8	123160340	123170161	-1	192156	protein_coding	Mvd	mevalonate (diphospho) decarboxylase [Source:MGI Symbol;Acc:MGI:2179327]
ENSMUSG00000006519	9803.32	-1.16293	-0.217761	0.10569	-2.06037	0.0393631	0.215105	9192.13	8936.92	9595.05	11489.2	8	123151515	123159669	-1	13057	protein_coding	Cyba	cytochrome b-245, alpha polypeptide [Source:MGI Symbol;Acc:MGI:1316658]
ENSMUSG00000006522	8.72326	-3.29543	-1.72047	1.20446	-1.42842	0.153172		5.37552	2.81566	21.4738	5.22806	14	30630529	30645717	-1	16426	protein_coding	Itih3	inter-alpha trypsin inhibitor, heavy chain 3 [Source:MGI Symbol;Acc:MGI:96620]
ENSMUSG00000006526	843.465	1.04975	0.0700471	0.137844	0.508162	0.61134	0.89305	905.237	823.112	839.346	806.166	14	30547547	30599167	1	69179	protein_coding	Stimate	STIM activating enhancer [Source:MGI Symbol;Acc:MGI:1921500]
ENSMUSG00000006527	761.593	1.10986	0.150383	0.149125	1.00844	0.313244	0.704216	812.778	790.263	781.46	661.872	14	30436806	30544678	1	54650	protein_coding	Sfmbt1	Scm-like with four mbt domains 1 [Source:MGI Symbol;Acc:MGI:1859609]
ENSMUSG00000006538	5.32388	-2.10485	-1.07372	1.41114	-0.76089	0.446723		2.15021	4.69277	10.2701	4.18245	1	74984474	74990831	-1	16147	protein_coding	Ihh	Indian hedgehog [Source:MGI Symbol;Acc:MGI:96533]
ENSMUSG00000006542	16.0429	3.60857	1.85143	0.833386	2.22157	0.0263123	0.161912	25.8025	24.4024	5.60186	8.36489	1	74778081	74788380	-1	241113	protein_coding	Prkag3	protein kinase, AMP-activated, gamma 3 non-catalytic subunit [Source:MGI Symbol;Acc:MGI:1891343]
ENSMUSG00000006567	345.389	1.04883	0.0687874	0.249722	0.275456	0.782966	0.950484	402.089	305.03	261.42	413.017	8	22482801	22550321	-1	11979	protein_coding	Atp7b	ATPase, Cu++ transporting, beta polypeptide [Source:MGI Symbol;Acc:MGI:103297]
ENSMUSG00000006575	220.584	1.24417	0.315184	0.240363	1.31128	0.189763	0.554303	242.973	245.901	171.79	221.67	11	102284229	102293381	1	51799	protein_coding	Rundc3a	RUN domain containing 3A [Source:MGI Symbol;Acc:MGI:1858752]
ENSMUSG00000006585	3082.04	-1.1059	-0.145217	0.0991058	-1.46527	0.142846	0.472021	2895.25	2958.32	3128.64	3345.96	8	123294754	123300293	1	67177	protein_coding	Cdt1	chromatin licensing and DNA replication factor 1 [Source:MGI Symbol;Acc:MGI:1914427]
ENSMUSG00000006587	5.56064	4.71902	2.23849	1.45415	1.53938	0.123713		11.8261	6.56988	2.80093	1.04561	8	123180947	123187472	-1	30927	protein_coding	Snai3	snail family zinc finger 3 [Source:MGI Symbol;Acc:MGI:1353563]
ENSMUSG00000006589	5288.13	1.00348	0.00500502	0.103103	0.0485439	0.961283	0.99133	5376.59	5217.42	4900.7	5657.8	8	123301374	123303648	-1	11821	protein_coding	Aprt	adenine phosphoribosyl transferase [Source:MGI Symbol;Acc:MGI:88061]
ENSMUSG00000006599	6963.49	1.02041	0.0291466	0.0919023	0.317148	0.751132	0.941274	6802.18	7265.35	7096.62	6689.82	7	46445527	46473224	1	14884	protein_coding	Gtf2h1	general transcription factor II H, polypeptide 1 [Source:MGI Symbol;Acc:MGI:1277216]
ENSMUSG00000006611	19.28	1.08167	0.113259	0.742743	0.152488	0.878802	0.97381	19.3519	20.6482	13.071	24.0491	13	23886017	23894837	-1	15216	protein_coding	Hfe	homeostatic iron regulator [Source:MGI Symbol;Acc:MGI:109191]
ENSMUSG00000006638	6.1216	-2.04952	-1.03529	1.29639	-0.798596	0.424525		4.30041	3.75422	11.2037	5.22806	5	31107410	31112435	1	57742	polymorphic_pseudogene	Abhd1	abhydrolase domain containing 1 [Source:MGI Symbol;Acc:MGI:1931013]
ENSMUSG00000006641	492.235	-1.05377	-0.0755536	0.166003	-0.455135	0.649012	0.907463	469.82	488.987	531.243	478.89	5	31193380	31206268	-1	330064	protein_coding	Slc5a6	solute carrier family 5 (sodium-dependent vitamin transporter), member 6 [Source:MGI Symbol;Acc:MGI:2660847]
ENSMUSG00000006673	4675.55	-1.00337	-0.00485527	0.0938853	-0.0517149	0.958756	0.99133	4571.34	4764.1	4828.8	4537.95	9	108394005	108437362	1	69232	protein_coding	Qrich1	glutamine-rich 1 [Source:MGI Symbol;Acc:MGI:1916482]
ENSMUSG00000006675	9.05847	1.76701	0.821313	1.08008	0.760421	0.447003		11.8261	11.2627	3.73457	9.4105	9	108456061	108474866	-1	74443	protein_coding	P4htm	prolyl 4-hydroxylase, transmembrane (endoplasmic reticulum) [Source:MGI Symbol;Acc:MGI:1921693]
ENSMUSG00000006676	9098.92	-1.05402	-0.075898	0.0862527	-0.879949	0.378887	0.757265	8707.26	9012	9540.9	9135.51	9	108367801	108379536	1	71472	protein_coding	Usp19	ubiquitin specific peptidase 19 [Source:MGI Symbol;Acc:MGI:1918722]
ENSMUSG00000006678	1296.7	1.10214	0.140313	0.130425	1.07581	0.282011	0.671954	1281.52	1437.87	1309.9	1157.49	X	92348373	92675761	-1	18968	protein_coding	Pola1	polymerase (DNA directed), alpha 1 [Source:MGI Symbol;Acc:MGI:99660]
ENSMUSG00000006699	21144.8	-1.12293	-0.16727	0.0966942	-1.72989	0.0836508	0.347243	19351.9	20487.7	20845.5	23894.3	4	137047007	137085031	-1	12540	protein_coding	Cdc42	cell division cycle 42 [Source:MGI Symbol;Acc:MGI:106211]
ENSMUSG00000006705	1300.72	-1.01301	-0.0186545	0.119422	-0.156206	0.87587	0.973553	1305.18	1279.25	1262.29	1356.16	17	31783708	31826667	1	18771	protein_coding	Pknox1	Pbx/knotted 1 homeobox [Source:MGI Symbol;Acc:MGI:1201409]
ENSMUSG00000006715	675.285	-1.74566	-0.80377	0.14766	-5.44339	5.2276e-08	1.94851e-06	513.899	470.216	853.35	863.675	13	24935828	24945906	-1	57441	protein_coding	Gmnn	geminin [Source:MGI Symbol;Acc:MGI:1927344]
ENSMUSG00000006717	374.974	1.13945	0.188343	0.202062	0.932106	0.351282	0.738026	426.816	372.606	393.064	307.41	13	25001931	25015523	-1	66834	protein_coding	Acot13	acyl-CoA thioesterase 13 [Source:MGI Symbol;Acc:MGI:1914084]
ENSMUSG00000006720	42.4644	1.83233	0.873681	0.552569	1.58113	0.113849	0.415377	53.7552	56.3133	42.014	17.7754	13	22129264	22144949	1	193452	protein_coding	Zfp184	zinc finger protein 184 (Kruppel-like) [Source:MGI Symbol;Acc:MGI:1922244]
ENSMUSG00000006724	101.214	-1.10463	-0.143557	0.356341	-0.402865	0.687048	0.91818	89.2336	103.241	129.776	82.6033	10	126884119	126888875	1	13115	protein_coding	Cyp27b1	cytochrome P450, family 27, subfamily b, polypeptide 1 [Source:MGI Symbol;Acc:MGI:1098274]
ENSMUSG00000006728	7509.35	1.1245	0.169283	0.0938317	1.80411	0.0712139	0.314497	8070.8	7827.54	6711.03	7428.02	10	126899403	126903789	1	12567	protein_coding	Cdk4	cyclin-dependent kinase 4 [Source:MGI Symbol;Acc:MGI:88357]
ENSMUSG00000006731	6541.01	-1.06424	-0.0898168	0.0985794	-0.911111	0.362237	0.745678	6369.99	6304.27	6309.56	7180.21	10	127001094	127008199	1	14421	protein_coding	B4galnt1	beta-1,4-N-acetyl-galactosaminyl transferase 1 [Source:MGI Symbol;Acc:MGI:1342057]
ENSMUSG00000006732	1198.94	-1.00166	-0.00239329	0.120317	-0.0198915	0.98413	0.995959	1171.86	1223.88	1209.07	1190.95	10	126877283	126882234	1	17299	protein_coding	Mettl1	methyltransferase like 1 [Source:MGI Symbol;Acc:MGI:1339986]
ENSMUSG00000006736	2315.73	-1.10948	-0.149886	0.105382	-1.42232	0.154933	0.494912	2242.67	2148.35	2350.91	2520.97	10	126903149	126906133	-1	67125	protein_coding	Tspan31	tetraspanin 31 [Source:MGI Symbol;Acc:MGI:1914375]
ENSMUSG00000006740	9159.03	-1.00535	-0.00769531	0.0886803	-0.0867759	0.93085	0.986789	8883.58	9385.55	9435.4	8931.61	18	6201002	6242174	-1	16573	protein_coding	Kif5b	kinesin family member 5B [Source:MGI Symbol;Acc:MGI:1098268]
ENSMUSG00000006763	1512.17	1.12607	0.171295	0.113225	1.51288	0.130311	0.448205	1628.78	1574.89	1395.8	1449.22	7	46335532	46360104	-1	78935	protein_coding	Saal1	serum amyloid A-like 1 [Source:MGI Symbol;Acc:MGI:1926185]
ENSMUSG00000006764	3.36032	-1.03469	-0.0492038	1.91229	-0.0257303	0.979472		0	6.56988	3.73457	3.13683	10	114914546	115020927	-1	216343	protein_coding	Tph2	tryptophan hydroxylase 2 [Source:MGI Symbol;Acc:MGI:2651811]
ENSMUSG00000006782	3801.96	1.33182	0.413396	0.0930986	4.44041	8.97895e-06	0.000233665	4298.26	4387.74	3301.36	3220.48	11	100465730	100482555	1	12799	protein_coding	Cnp	2',3'-cyclic nucleotide 3' phosphodiesterase [Source:MGI Symbol;Acc:MGI:88437]
ENSMUSG00000006784	169.745	-1.50458	-0.589362	0.30487	-1.93315	0.0532171	0.261034	141.914	129.521	254.885	152.659	11	100436433	100463394	1	74407	protein_coding	Odad4	outer dynein arm complex subunit 4 [Source:MGI Symbol;Acc:MGI:1921657]
ENSMUSG00000006818	2936.2	1.14749	0.198482	0.0984286	2.0165	0.0437472	0.230277	3155.43	3120.69	2806.53	2662.13	17	13225733	13258950	1	20656	protein_coding	Sod2	superoxide dismutase 2, mitochondrial [Source:MGI Symbol;Acc:MGI:98352]
ENSMUSG00000006850	848.054	-1.13586	-0.18378	0.16342	-1.12459	0.260764	0.64797	850.407	737.704	789.862	1014.24	18	36868092	36875450	1	71983	protein_coding	Tmco6	transmembrane and coiled-coil domains 6 [Source:MGI Symbol;Acc:MGI:1919233]
ENSMUSG00000006906	1243.13	1.06811	0.0950611	0.118344	0.80326	0.421825	0.789107	1289.05	1279.25	1217.47	1186.77	6	83520193	83549711	-1	70527	protein_coding	Stambp	STAM binding protein [Source:MGI Symbol;Acc:MGI:1917777]
ENSMUSG00000006920	2863.39	1.24238	0.313103	0.0998929	3.13439	0.00172214	0.0204048	3245.74	3100.05	2493.76	2614.03	11	101081941	101117289	-1	14055	protein_coding	Ezh1	enhancer of zeste 1 polycomb repressive complex 2 subunit [Source:MGI Symbol;Acc:MGI:1097695]
ENSMUSG00000006930	20.7132	3.71717	1.8942	0.746991	2.53578	0.0112198	0.0872802	34.4033	30.9723	11.2037	6.27367	11	100238153	100246954	-1	15114	protein_coding	Hap1	huntingtin-associated protein 1 [Source:MGI Symbol;Acc:MGI:1261831]
ENSMUSG00000006932	7970.76	-1.01867	-0.0266875	0.0991124	-0.269265	0.787726	0.952214	7369.83	8423.53	8223.53	7866.14	9	120758282	120789573	1	12387	protein_coding	Ctnnb1	catenin (cadherin associated protein), beta 1 [Source:MGI Symbol;Acc:MGI:88276]
ENSMUSG00000006941	1477.45	-1.02398	-0.0341856	0.12706	-0.269051	0.78789	0.952214	1466.44	1452.88	1368.72	1621.74	9	120321298	120324396	1	68969	protein_coding	Eif1b	eukaryotic translation initiation factor 1B [Source:MGI Symbol;Acc:MGI:1916219]
ENSMUSG00000006998	16914.4	-1.04483	-0.063262	0.0853842	-0.74091	0.458748	0.813761	16008.3	17077.9	16983	17588.2	16	20470402	20482164	1	21762	protein_coding	Psmd2	proteasome (prosome, macropain) 26S subunit, non-ATPase, 2 [Source:MGI Symbol;Acc:MGI:1096584]
ENSMUSG00000007021	8.26811	2.28625	1.19298	1.13852	1.04783	0.294716		10.751	12.2012	2.80093	7.31928	17	24904066	24908929	-1	20974	protein_coding	Syngr3	synaptogyrin 3 [Source:MGI Symbol;Acc:MGI:1341881]
ENSMUSG00000007029	20358.9	1.04979	0.070107	0.0948186	0.73938	0.459676	0.81478	20663.5	21044.3	21213.3	18514.6	17	35219963	35235298	1	22321	protein_coding	Vars	valyl-tRNA synthetase [Source:MGI Symbol;Acc:MGI:90675]
ENSMUSG00000007030	32.4187	-1.18477	-0.24461	0.58233	-0.420054	0.674446	0.915032	23.6523	35.6651	41.0803	29.2771	17	35235555	35245717	1	27762	protein_coding	Vwa7	von Willebrand factor A domain containing 7 [Source:MGI Symbol;Acc:MGI:1306798]
ENSMUSG00000007033	25.9893	-1.24295	-0.313767	0.651007	-0.481972	0.629826	0.899856	17.2016	29.0952	33.6112	24.0491	17	35191679	35198261	1	15482	protein_coding	Hspa1l	heat shock protein 1-like [Source:MGI Symbol;Acc:MGI:96231]
ENSMUSG00000007034	35.6669	-1.20084	-0.26404	0.557758	-0.473396	0.635931	0.904289	29.0278	35.6651	29.8766	48.0981	17	35133442	35149412	1	70129	protein_coding	Slc44a4	solute carrier family 44, member 4 [Source:MGI Symbol;Acc:MGI:1917379]
ENSMUSG00000007035	275.431	-1.55751	-0.639246	0.207145	-3.08598	0.00202882	0.0233428	222.546	208.359	335.178	335.641	17	35247581	35265721	-1	17687	protein_coding	Msh5	mutS homolog 5 [Source:MGI Symbol;Acc:MGI:1329021]
ENSMUSG00000007036	1075.19	-1.07035	-0.0980776	0.133516	-0.734573	0.4626	0.816774	1040.7	1036.16	1029.81	1194.09	17	35308239	35321963	1	193742	protein_coding	Abhd16a	abhydrolase domain containing 16A [Source:MGI Symbol;Acc:MGI:99476]
ENSMUSG00000007038	4214.96	1.06381	0.0892463	0.0914714	0.975675	0.329226	0.72019	4287.51	4402.76	4061.35	4108.21	17	35150229	35154929	1	18010	protein_coding	Neu1	neuraminidase 1 [Source:MGI Symbol;Acc:MGI:97305]
ENSMUSG00000007039	1603.9	1.18982	0.250748	0.114241	2.19489	0.0281713	0.170277	1796.5	1689.4	1421.94	1507.77	17	35278011	35281071	1	51793	protein_coding	Ddah2	dimethylarginine dimethylaminohydrolase 2 [Source:MGI Symbol;Acc:MGI:1859016]
ENSMUSG00000007041	15682.6	-1.13157	-0.178331	0.104494	-1.70662	0.0878935	0.35696	14934.3	14494.1	15134.4	18167.5	17	35268942	35277725	1	114584	protein_coding	Clic1	chloride intracellular channel 1 [Source:MGI Symbol;Acc:MGI:2148924]
ENSMUSG00000007050	1340.29	-1.59787	-0.676146	0.118151	-5.72272	1.0483e-08	4.43914e-07	1042.85	1021.15	1697.36	1599.79	17	35200838	35204867	1	27756	protein_coding	Lsm2	LSM2 homolog, U6 small nuclear RNA and mRNA degradation associated [Source:MGI Symbol;Acc:MGI:90676]
ENSMUSG00000007080	2729.2	-1.88213	-0.91237	0.105009	-8.68849	3.67283e-18	3.18601e-16	1970.66	1817.98	3677.62	3450.52	5	110434172	110485340	1	18973	protein_coding	Pole	polymerase (DNA directed), epsilon [Source:MGI Symbol;Acc:MGI:1196391]
ENSMUSG00000007097	8.814	1.19818	0.260849	1.07069	0.243627	0.807519		10.751	8.44699	5.60186	10.4561	1	172099276	172125631	-1	98660	protein_coding	Atp1a2	ATPase, Na+/K+ transporting, alpha 2 polypeptide [Source:MGI Symbol;Acc:MGI:88106]
ENSMUSG00000007122	3.50889	-2.48302	-1.3121	1.68439	-0.778974	0.435995		2.15021	1.87711	3.73457	6.27367	1	172037461	172047435	-1	12372	protein_coding	Casq1	calsequestrin 1 [Source:MGI Symbol;Acc:MGI:1309468]
ENSMUSG00000007207	504.061	-1.14263	-0.192353	0.215068	-0.894379	0.371119	0.751381	419.29	521.836	643.28	431.838	5	135052336	135079954	1	20907	protein_coding	Stx1a	syntaxin 1A (brain) [Source:MGI Symbol;Acc:MGI:109355]
ENSMUSG00000007216	374.978	-1.08463	-0.117205	0.204561	-0.572961	0.566671	0.87315	355.859	363.221	333.311	447.522	6	48578997	48600161	1	243372	protein_coding	Zfp775	zinc finger protein 775 [Source:MGI Symbol;Acc:MGI:2683557]
ENSMUSG00000007338	2883.02	1.08341	0.115579	0.0980716	1.17851	0.238592	0.619777	2941.48	3055	2736.51	2799.1	19	6103652	6107815	-1	18120	protein_coding	Mrpl49	mitochondrial ribosomal protein L49 [Source:MGI Symbol;Acc:MGI:108180]
ENSMUSG00000007379	28.6778	-1.33307	-0.414756	0.636048	-0.652082	0.514348	0.847602	33.3282	15.9554	29.8766	35.5508	3	103009920	103077085	1	329727	protein_coding	Dennd2c	DENN/MADD domain containing 2C [Source:MGI Symbol;Acc:MGI:3036254]
ENSMUSG00000007411	4540.28	-1.00161	-0.00231403	0.0960645	-0.0240883	0.980782	0.99495	4333.74	4738.76	4515.1	4573.5	12	111540957	111622655	1	17169	protein_coding	Mark3	MAP/microtubule affinity regulating kinase 3 [Source:MGI Symbol;Acc:MGI:1341865]
ENSMUSG00000007415	1708.16	-1.27917	-0.355205	0.11117	-3.19513	0.00139766	0.0172305	1459.99	1537.35	1874.76	1960.52	5	3682932	3707185	-1	67210	protein_coding	Gatad1	GATA zinc finger domain containing 1 [Source:MGI Symbol;Acc:MGI:1914460]
ENSMUSG00000007458	6189.43	-1.01722	-0.0246375	0.0865798	-0.284564	0.775978	0.948946	6130.24	6142.84	6216.2	6268.44	6	122285679	122294639	1	17113	protein_coding	M6pr	mannose-6-phosphate receptor, cation dependent [Source:MGI Symbol;Acc:MGI:96904]
ENSMUSG00000007476	151.899	1.04843	0.0682239	0.271416	0.251363	0.801533	0.956427	165.566	145.476	142.847	153.705	2	30127727	30153802	1	241296	protein_coding	Lrrc8a	leucine rich repeat containing 8A VRAC subunit A [Source:MGI Symbol;Acc:MGI:2652847]
ENSMUSG00000007480	3.72291	-1.46775	-0.553603	1.59169	-0.347807	0.727985		3.22531	2.81566	4.66822	4.18245	18	68470667	68475517	1	17203	protein_coding	Mc5r	melanocortin 5 receptor [Source:MGI Symbol;Acc:MGI:99420]
ENSMUSG00000007564	9100.08	-1.04736	-0.0667579	0.0914801	-0.729753	0.465541	0.818787	8780.37	8997.92	8869.61	9752.42	17	21165573	21186178	1	51792	protein_coding	Ppp2r1a	protein phosphatase 2, regulatory subunit A, alpha [Source:MGI Symbol;Acc:MGI:1926334]
ENSMUSG00000007570	902.3	1.05963	0.0835643	0.164202	0.508913	0.610813	0.892833	991.245	865.347	757.185	995.422	17	28532493	28545546	1	72775	protein_coding	Fance	Fanconi anemia, complementation group E [Source:MGI Symbol;Acc:MGI:1920025]
ENSMUSG00000007589	845.33	-1.56276	-0.644093	0.13444	-4.79094	1.66004e-06	4.95004e-05	654.738	664.497	1010.2	1051.89	14	55912146	55919277	-1	28113	protein_coding	Tinf2	Terf1 (TRF1)-interacting nuclear factor 2 [Source:MGI Symbol;Acc:MGI:107246]
ENSMUSG00000007591	37.5322	1.10988	0.150408	0.540327	0.278366	0.780732	0.949738	38.7037	40.3578	43.8812	27.1859	14	55887641	55889996	1	71099	protein_coding	Tssk4	testis-specific serine kinase 4 [Source:MGI Symbol;Acc:MGI:1918349]
ENSMUSG00000007594	60.0247	1.3249	0.405888	0.460202	0.881978	0.377788	0.756475	70.9568	65.6988	35.4785	67.9647	8	70536107	70543512	1	330790	protein_coding	Hapln4	hyaluronan and proteoglycan link protein 4 [Source:MGI Symbol;Acc:MGI:2679531]
ENSMUSG00000007603	2123.44	1.03511	0.0497903	0.103903	0.4792	0.631797	0.901037	2140.53	2179.32	2050.28	2123.64	17	57071757	57077093	1	224907	protein_coding	Dus3l	dihydrouridine synthase 3-like (S. cerevisiae) [Source:MGI Symbol;Acc:MGI:2147092]
ENSMUSG00000007610	842.785	1.06603	0.092252	0.133533	0.690856	0.489656	0.831953	882.66	856.9	816.004	815.577	8	71940747	71952227	1	70359	protein_coding	Gtpbp3	GTP binding protein 3 [Source:MGI Symbol;Acc:MGI:1917609]
ENSMUSG00000007613	767.538	-1.32233	-0.403086	0.156506	-2.57552	0.0100088	0.0803006	681.615	641.033	965.387	782.117	4	47353222	47414931	1	21812	protein_coding	Tgfbr1	transforming growth factor, beta receptor I [Source:MGI Symbol;Acc:MGI:98728]
ENSMUSG00000007617	2249.56	-1.0404	-0.0571362	0.116058	-0.492307	0.622502	0.897804	2264.17	2145.54	2124.04	2464.51	13	93436143	93541637	1	26556	protein_coding	Homer1	homer scaffolding protein 1 [Source:MGI Symbol;Acc:MGI:1347345]
ENSMUSG00000007646	188.754	1.51341	0.597798	0.244451	2.44547	0.0144664	0.105749	223.621	230.884	144.715	155.796	11	87267471	87295780	-1	114714	protein_coding	Rad51c	RAD51 paralog C [Source:MGI Symbol;Acc:MGI:2150020]
ENSMUSG00000007656	3053.02	-1.11287	-0.154286	0.111294	-1.38629	0.165657	0.513994	2766.24	3013.7	3430.21	3001.95	9	74944896	74967595	1	59046	protein_coding	Arpp19	cAMP-regulated phosphoprotein 19 [Source:MGI Symbol;Acc:MGI:1891691]
ENSMUSG00000007659	2464.16	-1.20048	-0.263615	0.148381	-1.7766	0.0756333	0.327223	2100.75	2377.36	2267.82	3110.69	2	152622588	152673648	-1	12048	protein_coding	Bcl2l1	BCL2-like 1 [Source:MGI Symbol;Acc:MGI:88139]
ENSMUSG00000007670	7072.8	1.05128	0.0721521	0.089642	0.804891	0.420883	0.788373	7181.69	7317.91	7132.1	6659.5	17	57328051	57338522	-1	16549	protein_coding	Khsrp	KH-type splicing regulatory protein [Source:MGI Symbol;Acc:MGI:1336214]
ENSMUSG00000007682	410.672	1.11299	0.154436	0.241554	0.639342	0.522601	0.852031	393.488	472.093	486.428	290.68	12	90691326	90705212	-1	13371	protein_coding	Dio2	deiodinase, iodothyronine, type II [Source:MGI Symbol;Acc:MGI:1338833]
ENSMUSG00000007721	1889.89	-1.03721	-0.0527024	0.123737	-0.425922	0.670164	0.913869	1862.08	1848.01	1747.78	2101.68	8	71320871	71326579	-1	234388	protein_coding	Ccdc124	coiled-coil domain containing 124 [Source:MGI Symbol;Acc:MGI:1916403]
ENSMUSG00000007739	17608.7	1.0655	0.0915283	0.0826226	1.10779	0.267954	0.657147	17791.9	18542.1	17287.3	16813.4	11	22940519	22953780	1	12464	protein_coding	Cct4	chaperonin containing Tcp1, subunit 4 (delta) [Source:MGI Symbol;Acc:MGI:104689]
ENSMUSG00000007777	372.723	-1.04068	-0.0575217	0.204863	-0.280781	0.778879	0.94942	385.962	344.45	328.643	431.838	11	51576213	51579701	-1	66050	protein_coding	0610009B22Rik	RIKEN cDNA 0610009B22 gene [Source:MGI Symbol;Acc:MGI:1913300]
ENSMUSG00000007783	10.4829	2.23914	1.16295	1.04428	1.11364	0.265434	0.65406	21.5021	7.50844	5.60186	7.31928	7	44608796	44624275	-1	78070	protein_coding	Cpt1c	carnitine palmitoyltransferase 1c [Source:MGI Symbol;Acc:MGI:2446526]
ENSMUSG00000007812	3511.26	-1.4303	-0.516313	0.0944751	-5.46507	4.62715e-08	1.75207e-06	2923.21	2856.02	4078.16	4187.67	5	145168525	145184112	1	72611	protein_coding	Zfp655	zinc finger protein 655 [Source:MGI Symbol;Acc:MGI:1919861]
ENSMUSG00000007815	9281.63	-1.0522	-0.0734021	0.0854255	-0.859253	0.390201	0.766936	8837.35	9253.21	9455.01	9580.94	9	108183328	108215133	1	11848	protein_coding	Rhoa	ras homolog family member A [Source:MGI Symbol;Acc:MGI:1096342]
ENSMUSG00000007817	8009.59	1.03609	0.0511562	0.0865655	0.590954	0.554551	0.867646	8211.64	8091.28	7681.09	8054.35	14	25459609	25667167	1	328365	protein_coding	Zmiz1	zinc finger, MIZ-type containing 1 [Source:MGI Symbol;Acc:MGI:3040693]
ENSMUSG00000007827	1302.16	1.21933	0.286088	0.131217	2.18027	0.0292375	0.175462	1454.61	1407.83	1274.42	1071.75	6	118478269	118539187	-1	232339	protein_coding	Ankrd26	ankyrin repeat domain 26 [Source:MGI Symbol;Acc:MGI:1917887]
ENSMUSG00000007833	1787.83	-1.25275	-0.325096	0.11528	-2.82006	0.00480145	0.0464346	1619.11	1555.18	1878.49	2098.54	7	44790108	44804008	-1	69748	protein_coding	Aldh16a1	aldehyde dehydrogenase 16 family, member A1 [Source:MGI Symbol;Acc:MGI:1916998]
ENSMUSG00000007836	7869.9	-1.08916	-0.123214	0.0890428	-1.38377	0.16643	0.514189	7262.32	7805.02	8166.58	8245.69	13	58273693	58276370	-1	77134	protein_coding	Hnrnpa0	heterogeneous nuclear ribonucleoprotein A0 [Source:MGI Symbol;Acc:MGI:1924384]
ENSMUSG00000007837	129.641	1.14284	0.192625	0.323114	0.596151	0.551074	0.866518	160.19	116.381	100.834	141.158	7	44703008	44712101	-1	65116	protein_coding	Prrg2	proline-rich Gla (G-carboxyglutamic acid) polypeptide 2 [Source:MGI Symbol;Acc:MGI:1929596]
ENSMUSG00000007850	15124.3	-1.16007	-0.214208	0.0948161	-2.2592	0.0238711	0.151381	13776.4	14231.3	17285.5	15204.2	11	50267817	50277355	1	59013	protein_coding	Hnrnph1	heterogeneous nuclear ribonucleoprotein H1 [Source:MGI Symbol;Acc:MGI:1891925]
ENSMUSG00000007867	1070.94	1.45959	0.545563	0.135555	4.02468	5.70538e-05	0.00118007	1368.61	1174.13	888.829	852.173	12	86129315	86209233	1	76411	protein_coding	Ift43	intraflagellar transport 43 [Source:MGI Symbol;Acc:MGI:1923661]
ENSMUSG00000007872	547.846	-1.16722	-0.223081	0.583268	-0.382468	0.702114	0.924249	476.271	534.976	822.54	357.599	4	135870808	135873066	1	15903	protein_coding	Id3	inhibitor of DNA binding 3 [Source:MGI Symbol;Acc:MGI:96398]
ENSMUSG00000007877	9.52011	-1.37826	-0.462845	1.03787	-0.445958	0.655628	0.909129	7.52572	8.44699	7.46915	14.6386	11	98274637	98275779	1	21393	protein_coding	Tcap	titin-cap [Source:MGI Symbol;Acc:MGI:1330233]
ENSMUSG00000007880	13295.2	-1.10563	-0.144863	0.0925717	-1.56488	0.117612	0.420909	12231.4	13025.3	14646.1	13278.2	4	133406319	133484080	-1	93760	protein_coding	Arid1a	AT rich interactive domain 1A (SWI-like) [Source:MGI Symbol;Acc:MGI:1935147]
ENSMUSG00000007888	1163.57	2.54306	1.34657	0.129	10.4385	1.65329e-25	1.79269e-23	1608.35	1732.57	688.095	625.276	8	70945808	70956731	1	12931	protein_coding	Crlf1	cytokine receptor-like factor 1 [Source:MGI Symbol;Acc:MGI:1340030]
ENSMUSG00000007891	3403.33	-1.1975	-0.260031	0.106596	-2.4394	0.0147117	0.10705	3064.04	3130.08	3456.35	3962.87	7	141929648	141941775	-1	13033	protein_coding	Ctsd	cathepsin D [Source:MGI Symbol;Acc:MGI:88562]
ENSMUSG00000007892	31614	1.14641	0.197123	0.0847866	2.32493	0.0200758	0.133587	35133.3	32408.3	29457.4	29457	9	61820566	61821824	-1	56040	protein_coding	Rplp1	ribosomal protein, large, P1 [Source:MGI Symbol;Acc:MGI:1927099]
ENSMUSG00000007908	972.183	1.30555	0.384653	0.131197	2.93187	0.00336924	0.035511	1123.48	1078.4	808.535	878.314	9	75922137	76043632	1	208982	protein_coding	Hmgcll1	3-hydroxymethyl-3-methylglutaryl-Coenzyme A lyase-like 1 [Source:MGI Symbol;Acc:MGI:2446108]
ENSMUSG00000007950	1094.29	1.30562	0.38474	0.12747	3.01827	0.0025422	0.0282285	1285.82	1192.9	918.705	979.738	8	71909349	71916299	-1	64296	protein_coding	Abhd8	abhydrolase domain containing 8 [Source:MGI Symbol;Acc:MGI:1918946]
ENSMUSG00000007987	759.248	-1.12871	-0.174673	0.144003	-1.21298	0.225137	0.602201	748.272	678.575	776.791	833.352	5	136937004	136944258	1	67286	protein_coding	Ift22	intraflagellar transport 22 [Source:MGI Symbol;Acc:MGI:1914536]
ENSMUSG00000008035	830.075	1.15763	0.211177	0.138993	1.51933	0.128679	0.444619	915.988	865.347	733.844	805.121	X	10581252	10585929	1	68041	protein_coding	Mid1ip1	Mid1 interacting protein 1 (gastrulation specific G12-like (zebrafish)) [Source:MGI Symbol;Acc:MGI:1915291]
ENSMUSG00000008036	3630.23	1.04401	0.0621419	0.113634	0.546859	0.584476	0.880819	3751.03	3665.06	3226.67	3878.17	7	16472335	16483219	1	232910	protein_coding	Ap2s1	adaptor-related protein complex 2, sigma 1 subunit [Source:MGI Symbol;Acc:MGI:2141861]
ENSMUSG00000008090	67.7131	1.16068	0.214965	0.404657	0.531229	0.59526	0.885471	73.107	72.2687	52.284	73.1928	5	108840248	108854790	1	116701	protein_coding	Fgfrl1	fibroblast growth factor receptor-like 1 [Source:MGI Symbol;Acc:MGI:2150920]
ENSMUSG00000008129	160.505	-1.42706	-0.513042	0.751327	-0.682847	0.494703	0.834987	146.214	118.258	95.2316	282.315	8	84874654	84899219	1	74666	protein_coding	Brme1	break repair meiotic recombinase recruitment factor 1 [Source:MGI Symbol;Acc:MGI:1921916]
ENSMUSG00000008140	1997.96	1.00531	0.00764282	0.12077	0.0632839	0.94954	0.989658	1995.39	2010.38	1820.6	2165.46	7	44139361	44145953	-1	69683	protein_coding	Emc10	ER membrane protein complex subunit 10 [Source:MGI Symbol;Acc:MGI:1916933]
ENSMUSG00000008167	233.138	-1.33021	-0.411655	0.228397	-1.80236	0.0714881	0.315221	204.27	196.158	288.496	243.627	8	85786684	85793753	1	68628	protein_coding	Fbxw9	F-box and WD-40 domain protein 9 [Source:MGI Symbol;Acc:MGI:1915878]
ENSMUSG00000008193	1864.52	1.27533	0.350874	0.134048	2.61752	0.008857	0.07349	1983.57	2197.16	1818.74	1458.63	7	44175417	44181495	-1	272382	protein_coding	Spib	Spi-B transcription factor (Spi-1/PU.1 related) [Source:MGI Symbol;Acc:MGI:892986]
ENSMUSG00000008200	9352.65	1.02238	0.031928	0.0994865	0.320928	0.748265	0.940309	9356.62	9556.36	9924.63	8572.97	2	90575714	90611365	1	55935	protein_coding	Fnbp4	formin binding protein 4 [Source:MGI Symbol;Acc:MGI:1860513]
ENSMUSG00000008206	1006.18	1.40901	0.494683	0.136499	3.62407	0.000290001	0.00463257	1262.17	1092.48	852.417	817.668	8	4543026	4581680	1	67260	protein_coding	Cers4	ceramide synthase 4 [Source:MGI Symbol;Acc:MGI:1914510]
ENSMUSG00000008226	491.238	-1.07111	-0.0991051	0.176169	-0.562556	0.573737	0.875375	518.2	430.797	482.694	533.262	2	73142945	73168162	1	74616	protein_coding	Scrn3	secernin 3 [Source:MGI Symbol;Acc:MGI:1921866]
ENSMUSG00000008301	2267.69	-1.04065	-0.0574849	0.106415	-0.540197	0.589061	0.883499	2157.73	2287.26	2389.19	2236.56	18	56695515	56720784	1	56698	protein_coding	Phax	phosphorylated adaptor for RNA export [Source:MGI Symbol;Acc:MGI:1891839]
ENSMUSG00000008305	1454.02	1.15804	0.211683	0.127521	1.65999	0.0969164	0.379349	1512.67	1608.68	1454.62	1240.1	4	72035379	72119156	-1	21885	protein_coding	Tle1	transducin-like enhancer of split 1 [Source:MGI Symbol;Acc:MGI:104636]
ENSMUSG00000008307	169.158	1.04952	0.069725	0.285561	0.244169	0.8071	0.957067	139.763	206.482	174.591	155.796	5	3621566	3634356	1	77036	protein_coding	1700109H08Rik	RIKEN cDNA 1700109H08 gene [Source:MGI Symbol;Acc:MGI:1924286]
ENSMUSG00000008318	4296.78	1.13438	0.181907	0.0953545	1.9077	0.0564306	0.271493	4682.07	4452.5	3903.56	4148.99	7	100495054	100512653	-1	320100	protein_coding	Relt	RELT tumor necrosis factor receptor [Source:MGI Symbol;Acc:MGI:2443373]
ENSMUSG00000008333	2927.96	1.00072	0.00104054	0.10173	0.0102285	0.991839	0.998373	2980.19	2878.55	3044.61	2808.51	2	142904959	142914773	1	20639	protein_coding	Snrpb2	U2 small nuclear ribonucleoprotein B [Source:MGI Symbol;Acc:MGI:104805]
ENSMUSG00000008348	1491.19	-1.38182	-0.46657	0.17685	-2.63823	0.00833409	0.0702922	1233.14	1271.74	2101.63	1358.25	5	125463029	125467266	-1	22190	protein_coding	Ubc	ubiquitin C [Source:MGI Symbol;Acc:MGI:98889]
ENSMUSG00000008373	4721.73	-1.03392	-0.0481249	0.0923656	-0.521026	0.602348	0.888714	4589.62	4696.53	4935.24	4665.52	7	3632984	3645485	1	68988	protein_coding	Prpf31	pre-mRNA processing factor 31 [Source:MGI Symbol;Acc:MGI:1916238]
ENSMUSG00000008384	1605.37	-1.15045	-0.202195	0.341899	-0.591388	0.554261	0.867646	1592.23	1393.75	1328.57	2106.91	7	27186335	27189741	1	55942	protein_coding	Sertad1	SERTA domain containing 1 [Source:MGI Symbol;Acc:MGI:1913438]
ENSMUSG00000008393	1732.71	-1.23248	-0.30156	0.124021	-2.43152	0.0150356	0.108799	1476.12	1627.45	1775.79	2051.49	16	8476444	8490019	-1	52502	protein_coding	Carhsp1	calcium regulated heat stable protein 1 [Source:MGI Symbol;Acc:MGI:1196368]
ENSMUSG00000008398	2130.81	1.12629	0.171577	0.110864	1.54764	0.121709	0.428541	2243.74	2270.36	1889.69	2119.45	10	93083276	93146997	-1	13713	protein_coding	Elk3	ELK3, member of ETS oncogene family [Source:MGI Symbol;Acc:MGI:101762]
ENSMUSG00000008429	1413.49	1.00741	0.0106513	0.114928	0.0926783	0.926159	0.985823	1395.48	1441.62	1386.46	1430.4	9	25019428	25063116	-1	80517	protein_coding	Herpud2	HERPUD family member 2 [Source:MGI Symbol;Acc:MGI:1915393]
ENSMUSG00000008435	956.563	1.14021	0.189298	0.12961	1.46051	0.144149	0.474777	1043.93	994.868	911.236	876.222	7	4427769	4448648	-1	108841	protein_coding	Rdh13	retinol dehydrogenase 13 (all-trans and 9-cis) [Source:MGI Symbol;Acc:MGI:1918732]
ENSMUSG00000008438	4.85522	1.38973	0.474802	1.46584	0.323912	0.746005		7.52572	3.75422	1.86729	6.27367	12	81605358	81615248	-1	56622	protein_coding	Adam21	a disintegrin and metallopeptidase domain 21 [Source:MGI Symbol;Acc:MGI:1861229]
ENSMUSG00000008450	695.22	1.01514	0.0216717	0.147201	0.147225	0.882954	0.974831	693.441	707.67	727.308	652.462	8	106587212	106605962	1	68051	protein_coding	Nutf2	nuclear transport factor 2 [Source:MGI Symbol;Acc:MGI:1915301]
ENSMUSG00000008461	2.97161	-1.2897	-0.367037	1.89962	-0.193216	0.84679		4.30041	0.938555	5.60186	1.04561	7	45266713	45270483	1	14343	protein_coding	Fut1	fucosyltransferase 1 [Source:MGI Symbol;Acc:MGI:109375]
ENSMUSG00000008475	14232.6	1.02374	0.0338502	0.08809	0.384268	0.70078	0.923689	14200	14598.3	13470.6	14661.6	1	152642293	152651348	1	67771	protein_coding	Arpc5	actin related protein 2/3 complex, subunit 5 [Source:MGI Symbol;Acc:MGI:1915021]
ENSMUSG00000008482	13.5351	-1.39521	-0.480481	0.897858	-0.535141	0.592552	0.884663	16.1265	6.56988	16.8056	14.6386	17	24934813	24937037	-1	67504	protein_coding	Rnf151	ring finger protein 151 [Source:MGI Symbol;Acc:MGI:1914754]
ENSMUSG00000008496	3518.71	1.28431	0.360994	0.110197	3.2759	0.00105327	0.0138054	4231.61	3682.89	3211.73	2948.62	7	24786769	24879151	-1	18987	protein_coding	Pou2f2	POU domain, class 2, transcription factor 2 [Source:MGI Symbol;Acc:MGI:101897]
ENSMUSG00000008601	31.7948	-1.40789	-0.49353	0.582354	-0.847475	0.396731	0.771742	32.2531	20.6482	34.5448	39.7332	3	88449336	88455607	-1	53868	protein_coding	Rab25	RAB25, member RAS oncogene family [Source:MGI Symbol;Acc:MGI:1858203]
ENSMUSG00000008604	4900.12	1.02386	0.0340137	0.0891367	0.38159	0.702765	0.924511	4935.8	4979.97	4871.75	4812.95	3	88461065	88477032	1	94232	protein_coding	Ubqln4	ubiquilin 4 [Source:MGI Symbol;Acc:MGI:2150152]
ENSMUSG00000008668	32663.9	1.10854	0.148656	0.0854504	1.73967	0.0819162	0.34344	35797.7	32893.5	30756.1	31208.4	17	34170973	34174975	-1	20084	protein_coding	Rps18	ribosomal protein S18 [Source:MGI Symbol;Acc:MGI:98146]
ENSMUSG00000008682	32254.8	1.1397	0.188648	0.0793343	2.37789	0.0174119	0.120653	34481.8	34239.4	29749.6	30548.6	X	73314418	73316741	1	110954	protein_coding	Rpl10	ribosomal protein L10 [Source:MGI Symbol;Acc:MGI:105943]
ENSMUSG00000008683	22049.3	1.19544	0.257545	0.0864656	2.97858	0.00289585	0.0315196	24803.7	23221.7	20659.7	19512.2	7	117703595	117715411	-1	267019	protein_coding	Rps15a	ribosomal protein S15A [Source:MGI Symbol;Acc:MGI:2389091]
ENSMUSG00000008690	5455.46	-1.03567	-0.0505673	0.0899388	-0.562241	0.573951	0.875516	5335.74	5383.55	5412.33	5690.22	15	89239922	89257029	1	52683	protein_coding	Ncaph2	non-SMC condensin II complex, subunit H2 [Source:MGI Symbol;Acc:MGI:1289164]
ENSMUSG00000008730	7470.86	-1.00089	-0.00127876	0.0866972	-0.0147497	0.988232	0.997497	7362.31	7572.26	7343.11	7605.78	3	103647131	103698879	-1	15257	protein_coding	Hipk1	homeodomain interacting protein kinase 1 [Source:MGI Symbol;Acc:MGI:1314873]
ENSMUSG00000008763	4150.71	1.02544	0.0362493	0.0955342	0.379438	0.704363	0.924658	4224.08	4182.2	4254.61	3941.96	3	100469524	100592819	-1	17156	protein_coding	Man1a2	mannosidase, alpha, class 1A, member 2 [Source:MGI Symbol;Acc:MGI:104676]
ENSMUSG00000008822	691.544	1.04541	0.0640684	0.157785	0.406049	0.684707	0.917462	754.722	659.804	726.375	625.276	12	85319172	85335212	-1	66204	protein_coding	Acyp1	acylphosphatase 1, erythrocyte (common) type [Source:MGI Symbol;Acc:MGI:1913454]
ENSMUSG00000008855	1933.88	1.04324	0.0610758	0.135254	0.451562	0.651585	0.908803	2216.86	1733.51	1839.28	1945.88	11	102085258	102120992	-1	15184	protein_coding	Hdac5	histone deacetylase 5 [Source:MGI Symbol;Acc:MGI:1333784]
ENSMUSG00000008859	2657.42	-1.17969	-0.238406	0.0985133	-2.42004	0.0155188	0.111283	2446.93	2429.92	2904.57	2848.25	13	18055156	18118824	-1	56044	protein_coding	Rala	v-ral simian leukemia viral oncogene A (ras related) [Source:MGI Symbol;Acc:MGI:1927243]
ENSMUSG00000008892	3707.73	1.06034	0.0845253	0.0999736	0.845476	0.397845	0.772221	3645.67	3986.04	3512.37	3686.83	8	23067091	23083829	-1	22335	protein_coding	Vdac3	voltage-dependent anion channel 3 [Source:MGI Symbol;Acc:MGI:106922]
ENSMUSG00000008958	2394.21	-1.0085	-0.0122129	0.105355	-0.115922	0.907714	0.97965	2385.65	2382.05	2298.63	2510.51	3	95018333	95030362	1	21427	protein_coding	Vps72	vacuolar protein sorting 72 [Source:MGI Symbol;Acc:MGI:1202305]
ENSMUSG00000008976	3316.12	1.02856	0.0406265	0.108909	0.373033	0.709124	0.92689	3322.07	3404.14	3513.3	3024.95	16	84631813	84660667	1	14390	protein_coding	Gabpa	GA repeat binding protein, alpha [Source:MGI Symbol;Acc:MGI:95610]
ENSMUSG00000009013	5339.11	-1.15035	-0.202069	0.10242	-1.97294	0.0485027	0.244702	4860.54	5070.07	5323.64	6102.19	5	115435169	115439058	-1	56455	protein_coding	Dynll1	dynein light chain LC8-type 1 [Source:MGI Symbol;Acc:MGI:1861457]
ENSMUSG00000009030	1328.4	-1.01176	-0.0168649	0.121106	-0.139258	0.889246	0.976025	1267.55	1373.11	1295.9	1377.07	2	37240086	37249344	-1	67466	protein_coding	Pdcl	phosducin-like [Source:MGI Symbol;Acc:MGI:1914716]
ENSMUSG00000009035	2122.45	-1.21066	-0.27579	0.11253	-2.45082	0.0142532	0.104565	1923.36	1916.53	2179.12	2470.78	15	79244884	79287769	-1	223693	protein_coding	Tmem184b	transmembrane protein 184b [Source:MGI Symbol;Acc:MGI:2445179]
ENSMUSG00000009073	3123.8	1.01253	0.0179616	0.0957535	0.187581	0.851205	0.967039	3157.58	3129.14	3141.71	3066.78	11	4715845	4799536	-1	18016	protein_coding	Nf2	neurofibromin 2 [Source:MGI Symbol;Acc:MGI:97307]
ENSMUSG00000009075	4.10944	1.16247	0.21719	1.61308	0.134643	0.892894		3.22531	5.63133	6.5355	1.04561	11	4686892	4696778	-1	192650	protein_coding	Cabp7	calcium binding protein 7 [Source:MGI Symbol;Acc:MGI:2183437]
ENSMUSG00000009076	429.05	1.236	0.305683	0.173294	1.76396	0.0777388	0.332638	455.844	492.741	391.197	376.42	11	4654678	4687669	1	67178	protein_coding	Zmat5	zinc finger, matrin type 5 [Source:MGI Symbol;Acc:MGI:1914428]
ENSMUSG00000009079	20339.3	-1.07731	-0.107429	0.0852272	-1.2605	0.207488	0.580035	19317.5	19847.6	21851.9	20340.3	11	5019689	5049266	-1	14030	protein_coding	Ewsr1	Ewing sarcoma breakpoint region 1 [Source:MGI Symbol;Acc:MGI:99960]
ENSMUSG00000009090	5364.73	1.03913	0.0553824	0.0886902	0.624448	0.532333	0.856768	5524.95	5410.77	5317.1	5206.1	11	4936824	4992791	1	11764	protein_coding	Ap1b1	adaptor protein complex AP-1, beta 1 subunit [Source:MGI Symbol;Acc:MGI:1096368]
ENSMUSG00000009092	24.6282	-1.50003	-0.584996	0.646626	-0.904689	0.36563	0.747713	22.5772	16.894	30.8102	28.2315	10	75729247	75731775	1	70377	protein_coding	Derl3	Der1-like domain family, member 3 [Source:MGI Symbol;Acc:MGI:1917627]
ENSMUSG00000009093	22.9037	-1.79924	-0.847386	0.697526	-1.21485	0.224425	0.601868	12.9012	19.7096	22.4074	36.5964	10	75650777	75658377	-1	75886	protein_coding	Gstt4	glutathione S-transferase, theta 4 [Source:MGI Symbol;Acc:MGI:1923136]
ENSMUSG00000009108	136.814	-1.13737	-0.185699	0.318162	-0.583663	0.559447	0.870466	156.965	99.4868	155.918	134.884	3	108000105	108008748	1	14686	protein_coding	Gnat2	guanine nucleotide binding protein, alpha transducing 2 [Source:MGI Symbol;Acc:MGI:95779]
ENSMUSG00000009112	4550.83	-1.09654	-0.132962	0.0950084	-1.39947	0.161672	0.506386	4183.23	4498.49	4671.02	4850.59	6	120813173	120869803	1	94044	protein_coding	Bcl2l13	BCL2-like 13 (apoptosis facilitator) [Source:MGI Symbol;Acc:MGI:2136959]
ENSMUSG00000009115	4.78108	2.89452	1.53333	1.4686	1.04407	0.296452		8.60082	5.63133	2.80093	2.09122	10	76398106	76406035	1	76573	protein_coding	Spatc1l	spermatogenesis and centriole associated 1 like [Source:MGI Symbol;Acc:MGI:1923823]
ENSMUSG00000009145	640.161	1.19143	0.252698	0.159364	1.58566	0.112816	0.413609	759.023	633.524	574.191	593.907	6	83034825	83044299	1	93838	protein_coding	Dqx1	DEAQ RNA-dependent ATPase [Source:MGI Symbol;Acc:MGI:2136388]
ENSMUSG00000009207	1559.76	-1.2127	-0.278227	0.115495	-2.409	0.0159962	0.114134	1349.25	1469.78	1684.29	1735.72	2	74350635	74409779	-1	69605	protein_coding	Lnpk	lunapark, ER junction formation factor [Source:MGI Symbol;Acc:MGI:1918115]
ENSMUSG00000009210	5.06529	-1.84685	-0.885067	1.42426	-0.621421	0.534323		4.30041	2.81566	3.73457	9.4105	11	106256298	106268384	1	75573	protein_coding	Prr29	proline rich 29 [Source:MGI Symbol;Acc:MGI:1922823]
ENSMUSG00000009246	4.05477	-2.32121	-1.21488	1.74642	-0.695639	0.486655		1.0751	3.75422	0.933644	10.4561	7	142622890	142648379	-1	56843	protein_coding	Trpm5	transient receptor potential cation channel, subfamily M, member 5 [Source:MGI Symbol;Acc:MGI:1861718]
ENSMUSG00000009291	4967.56	1.13612	0.184121	0.0948407	1.94137	0.0522134	0.257168	5063.74	5503.68	4586.06	4716.75	10	77417554	77434566	1	108705	protein_coding	Pttg1ip	pituitary tumor-transforming 1 interacting protein [Source:MGI Symbol;Acc:MGI:2652132]
ENSMUSG00000009292	686.718	1.49174	0.576993	0.158169	3.64794	0.000264348	0.00430445	855.782	788.386	500.433	602.272	10	77743556	77806397	-1	28240	protein_coding	Trpm2	transient receptor potential cation channel, subfamily M, member 2 [Source:MGI Symbol;Acc:MGI:1351901]
ENSMUSG00000009293	3055.09	-1.24379	-0.314745	0.0978255	-3.21741	0.00129355	0.016298	2715.71	2730.26	3296.7	3477.7	10	77458109	77481827	1	22213	protein_coding	Ube2g2	ubiquitin-conjugating enzyme E2G 2 [Source:MGI Symbol;Acc:MGI:1343188]
ENSMUSG00000009350	25.6754	-2.79141	-1.481	0.648019	-2.28542	0.0222882	0.143763	13.9763	13.1398	41.0803	34.5052	11	87684407	87695239	1	17523	protein_coding	Mpo	myeloperoxidase [Source:MGI Symbol;Acc:MGI:97137]
ENSMUSG00000009378	11.4928	2.87393	1.52302	0.955828	1.59341	0.111069	0.409725	17.2016	16.894	5.60186	6.27367	19	34645803	34724689	-1	240638	protein_coding	Slc16a12	solute carrier family 16 (monocarboxylic acid transporters), member 12 [Source:MGI Symbol;Acc:MGI:2147716]
ENSMUSG00000009406	960.025	-1.16395	-0.219028	0.141211	-1.55107	0.120885	0.427532	826.754	947.002	974.724	1091.62	X	20799634	20816847	-1	13712	protein_coding	Elk1	ELK1, member of ETS oncogene family [Source:MGI Symbol;Acc:MGI:101833]
ENSMUSG00000009470	9312.58	-1.10497	-0.144007	0.0894506	-1.60991	0.107417	0.401906	8691.13	9005.43	10150.6	9403.18	13	98975527	99062892	-1	238799	protein_coding	Tnpo1	transportin 1 [Source:MGI Symbol;Acc:MGI:2681523]
ENSMUSG00000009535	4102.94	1.01891	0.0270197	0.100275	0.269455	0.78758	0.952187	4166.02	4117.44	4291.96	3836.35	18	68433426	68457923	1	67897	protein_coding	Rnmt	RNA (guanine-7-) methyltransferase [Source:MGI Symbol;Acc:MGI:1915147]
ENSMUSG00000009549	2737.52	1.09677	0.13326	0.0982246	1.35669	0.174881	0.529272	2903.85	2824.11	2621.67	2600.44	2	118306331	118310192	-1	20813	protein_coding	Srp14	signal recognition particle 14 [Source:MGI Symbol;Acc:MGI:107169]
ENSMUSG00000009551	4.76388	1.14792	0.199021	1.42076	0.140081	0.888596		6.45062	3.75422	4.66822	4.18245	2	32622632	32631028	-1	70730	protein_coding	6330409D20Rik	RIKEN cDNA 6330409D20 gene [Source:MGI Symbol;Acc:MGI:1917980]
ENSMUSG00000009555	6731.38	1.02099	0.0299706	0.0923421	0.32456	0.745514	0.938784	6877.43	6724.74	6372.12	6951.23	2	32595796	32603088	-1	107951	protein_coding	Cdk9	cyclin-dependent kinase 9 (CDC2-related kinase) [Source:MGI Symbol;Acc:MGI:1328368]
ENSMUSG00000009563	2077.5	1.00616	0.00886129	0.11758	0.0753639	0.939925	0.98741	2098.6	2068.57	1908.37	2234.47	2	32647246	32652256	1	30933	protein_coding	Tor2a	torsin family 2, member A [Source:MGI Symbol;Acc:MGI:1353596]
ENSMUSG00000009566	2914.83	1.14885	0.200188	0.0981939	2.0387	0.0414804	0.22203	3067.27	3165.74	2662.75	2763.55	2	32572621	32594157	-1	14287	protein_coding	Fpgs	folylpolyglutamyl synthetase [Source:MGI Symbol;Acc:MGI:95576]
ENSMUSG00000009569	2022.88	1.06254	0.0875195	0.110525	0.791853	0.428446	0.793693	2067.42	2101.42	2061.48	1861.19	16	13074345	13235393	1	239719	protein_coding	Mrtfb	myocardin related transcription factor B [Source:MGI Symbol;Acc:MGI:3050795]
ENSMUSG00000009575	3633.9	1.11108	0.151963	0.0934349	1.62641	0.103863	0.394322	3873.6	3776.74	3427.41	3457.84	15	103099971	103148243	-1	12419	protein_coding	Cbx5	chromobox 5 [Source:MGI Symbol;Acc:MGI:109372]
ENSMUSG00000009585	9546.18	1.11336	0.154926	0.0909599	1.70323	0.0885251	0.358316	9796.34	10320.3	9399.92	8668.12	15	79775860	79800107	1	80287	protein_coding	Apobec3	apolipoprotein B mRNA editing enzyme, catalytic polypeptide 3 [Source:MGI Symbol;Acc:MGI:1933111]
ENSMUSG00000009614	19.4418	-2.28123	-1.18981	0.746863	-1.59308	0.111143	0.409764	8.60082	15.0169	28.0093	26.1403	2	27078405	27138349	-1	192166	protein_coding	Sardh	sarcosine dehydrogenase [Source:MGI Symbol;Acc:MGI:2183102]
ENSMUSG00000009621	2404.52	1.32388	0.404773	0.103261	3.91991	8.85812e-05	0.00172969	2745.81	2733.07	1999.86	2139.32	2	27152116	27317045	-1	22325	protein_coding	Vav2	vav 2 oncogene [Source:MGI Symbol;Acc:MGI:102718]
ENSMUSG00000009630	3987.18	-1.07865	-0.109226	0.104649	-1.04373	0.29661	0.686739	3611.27	4060.19	3982.92	4294.33	8	34089653	34109469	1	19053	protein_coding	Ppp2cb	protein phosphatase 2 (formerly 2A), catalytic subunit, beta isoform [Source:MGI Symbol;Acc:MGI:1321161]
ENSMUSG00000009633	2.92149	1.30534	0.384423	2.1	0.183058	0.854752		0	6.56988	0.933644	4.18245	1	192954469	192955525	-1	14373	protein_coding	G0s2	G0/G1 switch gene 2 [Source:MGI Symbol;Acc:MGI:1316737]
ENSMUSG00000009640	1137.53	1.02681	0.038168	0.124669	0.306154	0.759488	0.942727	1200.89	1104.68	1127.84	1116.71	4	117531878	117539470	-1	66233	protein_coding	Dmap1	DNA methyltransferase 1-associated protein 1 [Source:MGI Symbol;Acc:MGI:1913483]
ENSMUSG00000009647	481.787	-1.75005	-0.807396	0.166576	-4.847	1.25344e-06	3.83345e-05	335.432	365.098	618.072	608.546	10	59282806	59452514	-1	215999	protein_coding	Mcu	mitochondrial calcium uniporter [Source:MGI Symbol;Acc:MGI:3026965]
ENSMUSG00000009654	2.9129	-31.5784	-4.98087	2.35017	-2.11937	0.0340595		0	0	7.46915	4.18245	10	59258780	59277600	-1	18302	protein_coding	Oit3	oncoprotein induced transcript 3 [Source:MGI Symbol;Acc:MGI:1201782]
ENSMUSG00000009681	2417.39	1.14741	0.198378	0.109617	1.80974	0.0703366	0.312843	2542.62	2623.26	2116.57	2387.13	10	74896424	75020753	1	110279	protein_coding	Bcr	BCR activator of RhoGEF and GTPase [Source:MGI Symbol;Acc:MGI:88141]
ENSMUSG00000009687	13831.7	-1.22719	-0.295361	0.123745	-2.38686	0.0169931	0.118587	12591.6	12249.1	13137.3	17348.8	7	30732147	30741906	-1	18301	protein_coding	Fxyd5	FXYD domain-containing ion transport regulator 5 [Source:MGI Symbol;Acc:MGI:1201785]
ENSMUSG00000009731	155.061	-1.01915	-0.0273735	0.27412	-0.0998596	0.920456	0.984424	159.115	148.292	172.724	140.112	X	7688528	7704519	1	16506	protein_coding	Kcnd1	potassium voltage-gated channel, Shal-related family, member 1 [Source:MGI Symbol;Acc:MGI:96671]
ENSMUSG00000009733	475.658	1.04916	0.0692378	0.176491	0.392302	0.694835	0.921313	534.326	440.182	456.552	471.571	15	100395893	100449889	-1	21422	protein_coding	Tfcp2	transcription factor CP2 [Source:MGI Symbol;Acc:MGI:98509]
ENSMUSG00000009739	42.578	1.7938	0.843016	0.494909	1.70338	0.0884979	0.358316	55.9054	53.4976	32.6775	28.2315	15	100473199	100497865	-1	19009	protein_coding	Pou6f1	POU domain, class 6, transcription factor 1 [Source:MGI Symbol;Acc:MGI:102935]
ENSMUSG00000009741	3369.14	1.00417	0.00600963	0.112513	0.0534127	0.957403	0.990759	3401.63	3351.58	3652.41	3070.96	9	113760002	113806270	1	22221	protein_coding	Ubp1	upstream binding protein 1 [Source:MGI Symbol;Acc:MGI:104889]
ENSMUSG00000009772	581.507	1.39262	0.477802	0.205144	2.32911	0.0198532	0.132722	674.09	680.452	591.93	379.557	1	132243864	132261226	1	74137	protein_coding	Nuak2	NUAK family, SNF1-like kinase, 2 [Source:MGI Symbol;Acc:MGI:1921387]
ENSMUSG00000009828	379.13	1.25896	0.332238	0.180859	1.83699	0.0662107	0.300932	409.614	435.489	338.913	332.504	9	78016474	78079389	1	56542	protein_coding	Cilk1	ciliogenesis associated kinase 1 [Source:MGI Symbol;Acc:MGI:1934157]
ENSMUSG00000009863	7322.09	-1.026	-0.0370343	0.0858559	-0.431355	0.66621	0.912423	7192.44	7263.47	7311.36	7521.08	4	140688514	140706504	1	67680	protein_coding	Sdhb	succinate dehydrogenase complex, subunit B, iron sulfur (Ip) [Source:MGI Symbol;Acc:MGI:1914930]
ENSMUSG00000009876	7.03963	-2.53701	-1.34313	1.2485	-1.0758	0.282019		3.22531	4.69277	5.60186	14.6386	2	152596093	152606957	1	84682	protein_coding	Cox4i2	cytochrome c oxidase subunit 4I2 [Source:MGI Symbol;Acc:MGI:2135755]
ENSMUSG00000009894	1655.35	1.20019	0.263262	0.118329	2.22483	0.0260925	0.16115	1855.63	1756.04	1417.27	1592.47	11	59297960	59342012	-1	67826	protein_coding	Snap47	synaptosomal-associated protein, 47 [Source:MGI Symbol;Acc:MGI:1915076]
ENSMUSG00000009905	611.653	1.16986	0.226339	0.153932	1.47038	0.141458	0.469438	691.291	627.893	547.115	580.314	1	106648189	106687457	-1	70750	protein_coding	Kdsr	3-ketodihydrosphingosine reductase [Source:MGI Symbol;Acc:MGI:1918000]
ENSMUSG00000009907	5043.03	-1.01415	-0.0202696	0.0902047	-0.224707	0.822207	0.960208	4919.67	5095.41	5144.38	5012.66	1	106691801	106724458	-1	20479	protein_coding	Vps4b	vacuolar protein sorting 4B [Source:MGI Symbol;Acc:MGI:1100499]
ENSMUSG00000009927	24658.7	1.16853	0.224699	0.0838146	2.68091	0.0073423	0.0637684	27472.1	25678.9	22924.7	22559.1	9	44318436	44321724	1	75617	protein_coding	Rps25	ribosomal protein S25 [Source:MGI Symbol;Acc:MGI:1922867]
ENSMUSG00000009941	3.83698	-2.09925	-1.06988	1.71876	-0.62247	0.533633		2.15021	2.81566	9.33644	1.04561	X	133845275	133865503	-1	83454	protein_coding	Nxf2	nuclear RNA export factor 2 [Source:MGI Symbol;Acc:MGI:1933192]
ENSMUSG00000009995	2188.27	1.13165	0.178423	0.112441	1.58681	0.112555	0.413038	2408.23	2238.45	1941.98	2164.42	X	73325518	73333757	1	66826	protein_coding	Taz	tafazzin [Source:MGI Symbol;Acc:MGI:109626]
ENSMUSG00000010021	452.091	1.79222	0.841747	0.177762	4.73525	2.18785e-06	6.32619e-05	627.86	533.099	321.173	326.231	11	114656214	114681565	1	286942	protein_coding	Kif19a	kinesin family member 19A [Source:MGI Symbol;Acc:MGI:2447024]
ENSMUSG00000010025	1444.98	1.07266	0.101198	0.113549	0.891225	0.372808	0.753162	1494.39	1496.99	1413.54	1374.98	11	61114243	61158290	-1	11671	protein_coding	Aldh3a2	aldehyde dehydrogenase family 3, subfamily A2 [Source:MGI Symbol;Acc:MGI:1353452]
ENSMUSG00000010044	13.7566	-1.16476	-0.22003	0.95877	-0.229492	0.818487	0.960208	15.0514	10.3241	5.60186	24.0491	9	107424497	107428518	1	114602	protein_coding	Zmynd10	zinc finger, MYND domain containing 10 [Source:MGI Symbol;Acc:MGI:2387863]
ENSMUSG00000010045	1764.48	-1.06153	-0.0861412	0.134011	-0.64279	0.520361	0.850495	1676.09	1746.65	1607.73	2027.44	9	107411144	107415872	1	56395	protein_coding	Tmem115	transmembrane protein 115 [Source:MGI Symbol;Acc:MGI:1930765]
ENSMUSG00000010047	691.11	-1.02931	-0.0416828	0.151941	-0.274336	0.783826	0.95065	704.193	657.927	652.617	749.703	9	107445144	107449978	1	15587	protein_coding	Hyal2	hyaluronoglucosaminidase 2 [Source:MGI Symbol;Acc:MGI:1196334]
ENSMUSG00000010048	3392.92	-1.12705	-0.172549	0.0946734	-1.82257	0.0683681	0.307006	3140.38	3239.89	3594.53	3596.9	9	107464841	107470584	1	15983	protein_coding	Ifrd2	interferon-related developmental regulator 2 [Source:MGI Symbol;Acc:MGI:1316708]
ENSMUSG00000010051	27.534	-1.16352	-0.21849	0.605164	-0.361043	0.718067	0.930562	23.6523	27.2181	28.943	30.3227	9	107454126	107458909	1	15586	protein_coding	Hyal1	hyaluronoglucosaminidase 1 [Source:MGI Symbol;Acc:MGI:96298]
ENSMUSG00000010054	593.933	-1.04412	-0.0622809	0.150623	-0.413488	0.679249	0.916045	578.405	583.781	605.001	608.546	9	107440454	107443311	1	80385	protein_coding	Tusc2	tumor suppressor 2, mitochondrial calcium regulator [Source:MGI Symbol;Acc:MGI:1931086]
ENSMUSG00000010057	992.037	1.06566	0.091753	0.134663	0.681351	0.495649	0.835947	1056.83	990.175	903.767	1017.38	9	107419425	107422905	1	56032	protein_coding	Nprl2	NPR2 like, GATOR1 complex subunit [Source:MGI Symbol;Acc:MGI:1914482]
ENSMUSG00000010066	26.2361	1.56749	0.64846	0.644793	1.00569	0.314566	0.705342	32.2531	31.9109	26.142	14.6386	9	107276811	107406542	1	56808	protein_coding	Cacna2d2	calcium channel, voltage-dependent, alpha 2/delta subunit 2 [Source:MGI Symbol;Acc:MGI:1929813]
ENSMUSG00000010067	1512.45	-1.13474	-0.182361	0.135979	-1.3411	0.17989	0.53854	1401.93	1431.3	1427.54	1789.04	9	107428754	107439466	1	56289	protein_coding	Rassf1	Ras association (RalGDS/AF-6) domain family member 1 [Source:MGI Symbol;Acc:MGI:1928386]
ENSMUSG00000010080	5.88573	-1.18641	-0.246599	1.30143	-0.189484	0.849714		3.22531	7.50844	6.5355	6.27367	11	94380425	94390800	-1	71889	protein_coding	Epn3	epsin 3 [Source:MGI Symbol;Acc:MGI:1919139]
ENSMUSG00000010095	10831	-1.10338	-0.141933	0.103169	-1.37574	0.168903	0.518115	10046.8	10549.4	10431.6	12296.4	19	8684246	8700733	-1	17254	protein_coding	Slc3a2	solute carrier family 3 (activators of dibasic and neutral amino acid transport), member 2 [Source:MGI Symbol;Acc:MGI:96955]
ENSMUSG00000010097	9071.39	-1.01796	-0.0256811	0.083899	-0.306095	0.759532	0.942727	8899.7	9081.45	9181.45	9122.96	19	8734437	8748286	1	53319	protein_coding	Nxf1	nuclear RNA export factor 1 [Source:MGI Symbol;Acc:MGI:1858330]
ENSMUSG00000010110	3097.79	1.01086	0.0155889	0.0991446	0.157234	0.87506	0.973553	3083.4	3145.1	2974.59	3188.07	19	8718777	8733433	1	56389	protein_coding	Stx5a	syntaxin 5A [Source:MGI Symbol;Acc:MGI:1928483]
ENSMUSG00000010122	2.73205	-1.15046	-0.202208	1.8511	-0.109237	0.913015		3.22531	1.87711	3.73457	2.09122	11	61234227	61269171	-1	67473	protein_coding	Slc47a1	solute carrier family 47, member 1 [Source:MGI Symbol;Acc:MGI:1914723]
ENSMUSG00000010142	5835.38	1.17072	0.227398	0.104362	2.17894	0.029336	0.175979	6535.55	6052.74	5003.4	5749.82	11	61017581	61040198	1	57916	protein_coding	Tnfrsf13b	tumor necrosis factor receptor superfamily, member 13b [Source:MGI Symbol;Acc:MGI:1889411]
ENSMUSG00000010154	5.99797	1.42422	0.510167	1.26793	0.402362	0.687418		7.52572	6.56988	4.66822	5.22806	8	124059452	124096254	1	234857	protein_coding	Spire2	spire type actin nucleation factor 2 [Source:MGI Symbol;Acc:MGI:2446256]
ENSMUSG00000010277	10041.3	1.10265	0.14097	0.0847185	1.66398	0.096116	0.377423	10615.6	10448	9751.91	9349.86	11	78152578	78181449	1	72503	protein_coding	2610507B11Rik	RIKEN cDNA 2610507B11 gene [Source:MGI Symbol;Acc:MGI:1919753]
ENSMUSG00000010290	1905.83	1.17472	0.232312	0.108203	2.14701	0.0317925	0.184905	2113.65	2004.75	1786.99	1717.94	1	43137870	43155107	1	98404	protein_coding	AI597479	expressed sequence AI597479 [Source:MGI Symbol;Acc:MGI:2138299]
ENSMUSG00000010307	185.003	1.06196	0.0867287	0.299127	0.289939	0.771863	0.947257	174.167	206.482	133.511	225.852	7	46700349	46704525	1	67893	protein_coding	Tmem86a	transmembrane protein 86A [Source:MGI Symbol;Acc:MGI:1915143]
ENSMUSG00000010342	59.9371	-7.66565	-2.93841	0.535752	-5.48464	4.14314e-08	1.57296e-06	8.60082	18.7711	77.4924	134.884	11	87295891	87446649	1	83560	protein_coding	Tex14	testis expressed gene 14 [Source:MGI Symbol;Acc:MGI:1933227]
ENSMUSG00000010358	1746.08	1.09515	0.131124	0.109799	1.19422	0.232391	0.612527	1828.75	1821.73	1618	1715.85	11	101339233	101349524	1	70110	protein_coding	Ifi35	interferon-induced protein 35 [Source:MGI Symbol;Acc:MGI:1917360]
ENSMUSG00000010362	670.525	-1.75697	-0.813092	0.147451	-5.51431	3.50156e-08	1.33647e-06	499.923	473.031	831.876	877.268	11	101518021	101526926	1	66599	protein_coding	Rdm1	RAD52 motif 1 [Source:MGI Symbol;Acc:MGI:1913849]
ENSMUSG00000010376	3800.94	-1.14499	-0.195339	0.0949743	-2.05675	0.0397099	0.216192	3603.75	3484.85	4157.51	3957.64	14	55899720	55909581	-1	18002	protein_coding	Nedd8	neural precursor cell expressed, developmentally down-regulated gene 8 [Source:MGI Symbol;Acc:MGI:97301]
ENSMUSG00000010392	3561.37	-1.10306	-0.141505	0.0947176	-1.49397	0.135184	0.456343	3341.42	3432.29	3802.73	3669.05	11	76617428	76654405	-1	53334	protein_coding	Gosr1	golgi SNAP receptor complex member 1 [Source:MGI Symbol;Acc:MGI:1858260]
ENSMUSG00000010406	1328.96	-1.12018	-0.163731	0.118583	-1.38073	0.167361	0.51581	1229.92	1277.37	1447.15	1361.39	14	54664366	54667213	1	68836	protein_coding	Mrpl52	mitochondrial ribosomal protein L52 [Source:MGI Symbol;Acc:MGI:1916086]
ENSMUSG00000010453	4278.84	-1.0362	-0.0513082	0.0965081	-0.531646	0.594971	0.885471	4019.81	4384.93	4319.04	4391.57	1	36374811	36408262	-1	226976	protein_coding	Kansl3	KAT8 regulatory NSL complex subunit 3 [Source:MGI Symbol;Acc:MGI:1918055]
ENSMUSG00000010492	13.7098	-1.48835	-0.573711	0.856673	-0.669696	0.503052	0.839863	10.751	11.2627	14.0047	18.821	2	181220273	181226963	1	100271841	lncRNA	Uckl1os	uridine-cytidine kinase 1-like 1, opposite strand [Source:MGI Symbol;Acc:MGI:3801877]
ENSMUSG00000010505	2.48144	-8.64683	-3.11217	2.35166	-1.32339	0.185705		1.0751	0	4.66822	4.18245	2	181405125	181469590	1	17932	protein_coding	Myt1	myelin transcription factor 1 [Source:MGI Symbol;Acc:MGI:1100535]
ENSMUSG00000010517	3602.95	1.08593	0.118934	0.10014	1.18768	0.234961	0.615371	3588.69	3913.77	3540.38	3368.96	4	109533785	109821157	1	14084	protein_coding	Faf1	Fas-associated factor 1 [Source:MGI Symbol;Acc:MGI:109419]
ENSMUSG00000010529	388.627	-1.0054	-0.00777091	0.194833	-0.0398849	0.968185	0.99133	388.112	386.684	342.647	437.066	12	111451043	111452257	-1	212539	protein_coding	Gm266	predicted gene 266 [Source:MGI Symbol;Acc:MGI:2685112]
ENSMUSG00000010538	56.5896	-1.14007	-0.189125	0.438383	-0.431414	0.666167	0.912423	58.0556	47.8663	68.156	52.2806	3	88190064	88204306	-1	76927	protein_coding	Tsacc	TSSK6 activating co-chaperone [Source:MGI Symbol;Acc:MGI:1924177]
ENSMUSG00000010554	3822.25	-1.02861	-0.0406902	0.104635	-0.388875	0.697368	0.922669	3528.49	4007.63	3969.85	3783.02	11	74661656	74719351	1	67493	protein_coding	Mettl16	methyltransferase like 16 [Source:MGI Symbol;Acc:MGI:1914743]
ENSMUSG00000010607	573.413	1.15727	0.210725	0.154616	1.36289	0.172916	0.526304	636.461	594.105	525.641	537.444	9	22068142	22069654	1	66268	protein_coding	Pigyl	phosphatidylinositol glycan anchor biosynthesis, class Y-like [Source:MGI Symbol;Acc:MGI:1913518]
ENSMUSG00000010608	12536.2	1.01229	0.0176293	0.103421	0.170461	0.864648	0.970491	12494.8	12731.5	13546.2	11372.1	12	83678010	83729897	1	67039	protein_coding	Rbm25	RNA binding motif protein 25 [Source:MGI Symbol;Acc:MGI:1914289]
ENSMUSG00000010609	1146.12	1.27134	0.346355	0.12114	2.85914	0.00424788	0.042577	1285.82	1280.19	998.999	1019.47	1	180054569	180091003	-1	19165	protein_coding	Psen2	presenilin 2 [Source:MGI Symbol;Acc:MGI:109284]
ENSMUSG00000010651	19.0342	1.42237	0.5083	0.73098	0.695367	0.486825	0.829812	19.3519	25.341	16.8056	14.6386	9	118977091	118986161	-1	235674	protein_coding	Acaa1b	acetyl-Coenzyme A acyltransferase 1B [Source:MGI Symbol;Acc:MGI:3605455]
ENSMUSG00000010663	2932.58	1.06617	0.0924436	0.104454	0.885014	0.376149	0.755094	3050.07	3002.44	2684.23	2993.59	19	10160252	10174241	1	76267	protein_coding	Fads1	fatty acid desaturase 1 [Source:MGI Symbol;Acc:MGI:1923517]
ENSMUSG00000010751	763.644	-1.10218	-0.140354	0.17529	-0.800699	0.423306	0.789857	743.971	708.609	670.356	931.64	7	143188543	143203398	-1	79202	protein_coding	Tnfrsf22	tumor necrosis factor receptor superfamily, member 22 [Source:MGI Symbol;Acc:MGI:1930270]
ENSMUSG00000010755	2837.11	1.06996	0.0975573	0.10882	0.896506	0.369983	0.750853	3097.37	2769.67	2848.55	2632.85	7	143110967	143153827	-1	27267	protein_coding	Cars	cysteinyl-tRNA synthetase [Source:MGI Symbol;Acc:MGI:1351477]
ENSMUSG00000010830	154.135	1.21866	0.285292	0.298703	0.955101	0.339526	0.728801	190.293	148.292	114.838	163.115	15	79400612	79411940	1	105785	protein_coding	Kdelr3	KDEL (Lys-Asp-Glu-Leu) endoplasmic reticulum protein retention receptor 3 [Source:MGI Symbol;Acc:MGI:2145953]
ENSMUSG00000010911	384.166	1.01785	0.0255242	0.18216	0.140119	0.888566	0.975609	376.286	398.886	398.666	362.827	2	102904020	102922989	1	56369	protein_coding	Apip	APAF1 interacting protein [Source:MGI Symbol;Acc:MGI:1926788]
ENSMUSG00000010914	1144.92	-1.03125	-0.0443898	0.136802	-0.324482	0.745573	0.938784	1033.17	1221.06	1211.87	1113.58	2	102851420	102903858	-1	27402	protein_coding	Pdhx	pyruvate dehydrogenase complex, component X [Source:MGI Symbol;Acc:MGI:1351627]
ENSMUSG00000010936	5078.16	1.08647	0.119655	0.0942731	1.26923	0.204357	0.577031	5112.12	5464.26	4738.24	4998.02	8	111345217	111447030	1	234729	protein_coding	Vac14	Vac14 homolog (S. cerevisiae) [Source:MGI Symbol;Acc:MGI:2157980]
ENSMUSG00000011008	1961.78	1.06487	0.0906723	0.118801	0.76323	0.445326	0.805384	1958.84	2088.28	2038.14	1761.86	3	145855588	145901268	1	68279	protein_coding	Mcoln2	mucolipin 2 [Source:MGI Symbol;Acc:MGI:1915529]
ENSMUSG00000011096	1206.86	-1.04965	-0.0699149	0.140118	-0.498972	0.617799	0.896178	1074.03	1280.19	1156.78	1316.42	7	44498415	44504845	1	67605	protein_coding	Akt1s1	AKT1 substrate 1 (proline-rich) [Source:MGI Symbol;Acc:MGI:1914855]
ENSMUSG00000011114	3915.26	1.02675	0.0380784	0.0927724	0.41045	0.681476	0.916554	3933.8	4000.12	3923.17	3803.93	9	37560059	37568608	-1	21376	protein_coding	Tbrg1	transforming growth factor beta regulated gene 1 [Source:MGI Symbol;Acc:MGI:1100877]
ENSMUSG00000011148	1047.57	1.04397	0.0620758	0.163794	0.378987	0.704697	0.924843	1161.11	978.912	882.293	1167.95	12	112586479	112607794	1	11565	protein_coding	Adssl1	adenylosuccinate synthetase like 1 [Source:MGI Symbol;Acc:MGI:87947]
ENSMUSG00000011158	2938.33	-1.04153	-0.058709	0.101989	-0.575642	0.564857	0.87283	2909.23	2848.51	3129.57	2866.02	12	112923705	112964324	-1	72308	protein_coding	Brf1	BRF1, RNA polymerase III transcription initiation factor 90 kDa subunit [Source:MGI Symbol;Acc:MGI:1919558]
ENSMUSG00000011179	9622.92	1.0504	0.0709338	0.0857189	0.827517	0.407944	0.779248	9709.26	10009.7	9592.25	9180.47	12	17594795	17601506	1	18263	protein_coding	Odc1	ornithine decarboxylase, structural 1 [Source:MGI Symbol;Acc:MGI:97402]
ENSMUSG00000011254	773.864	-1.01467	-0.0210071	0.137059	-0.15327	0.878185	0.97381	768.699	767.738	775.858	783.163	11	45837670	45846321	-1	66628	protein_coding	Thg1l	tRNA-histidine guanylyltransferase 1-like (S. cerevisiae) [Source:MGI Symbol;Acc:MGI:1913878]
ENSMUSG00000011256	104.104	1.76545	0.820032	0.432114	1.89772	0.0577329	0.274894	147.289	118.258	41.0803	109.789	11	45946819	46038170	1	11492	protein_coding	Adam19	a disintegrin and metallopeptidase domain 19 (meltrin beta) [Source:MGI Symbol;Acc:MGI:105377]
ENSMUSG00000011257	8715.72	-1.01234	-0.0176875	0.0943269	-0.187512	0.851259	0.967039	8492.24	8832.74	9243.07	8294.84	4	123156144	123192718	1	230721	protein_coding	Pabpc4	poly(A) binding protein, cytoplasmic 4 [Source:MGI Symbol;Acc:MGI:2385206]
ENSMUSG00000011267	1005.74	1.00161	0.00232543	0.126334	0.0184069	0.985314	0.996594	1019.2	993.929	992.463	1017.38	7	19311212	19314581	1	63872	protein_coding	Zfp296	zinc finger protein 296 [Source:MGI Symbol;Acc:MGI:1926956]
ENSMUSG00000011306	3484.08	-1.01756	-0.0251111	0.0958073	-0.2621	0.793245	0.954414	3408.08	3498.93	3429.27	3600.04	8	70495463	70524997	1	70616	protein_coding	Sugp1	SURP and G patch domain containing 1 [Source:MGI Symbol;Acc:MGI:1917866]
ENSMUSG00000011382	16.8907	4.23599	2.0827	0.82694	2.51856	0.0117836	0.0905431	31.178	23.4639	5.60186	7.31928	7	45120411	45138229	-1	71755	protein_coding	Dhdh	dihydrodiol dehydrogenase (dimeric) [Source:MGI Symbol;Acc:MGI:1919005]
ENSMUSG00000011427	687.358	1.06464	0.0903632	0.152949	0.590807	0.55465	0.867646	677.315	740.52	710.503	621.093	7	29515539	29530430	1	233056	protein_coding	Zfp790	zinc finger protein 790 [Source:MGI Symbol;Acc:MGI:1923431]
ENSMUSG00000011632	3.47748	1.88941	0.917935	1.70266	0.539118	0.589806		5.37552	3.75422	3.73457	1.04561	7	24241083	24245543	-1	641361	protein_coding	Pinlyp	phospholipase A2 inhibitor and LY6/PLAUR domain containing [Source:MGI Symbol;Acc:MGI:3615324]
ENSMUSG00000011658	333.48	1.13541	0.183217	0.195127	0.938962	0.34775	0.734664	369.835	339.757	330.51	293.817	7	44545503	44552055	1	70300	protein_coding	Fuz	fuzzy planar cell polarity protein [Source:MGI Symbol;Acc:MGI:1917550]
ENSMUSG00000011751	14.4439	1.59461	0.6732	0.895834	0.751479	0.452365	0.80935	20.427	15.0169	5.60186	16.7298	7	27055808	27147111	-1	80297	protein_coding	Sptbn4	spectrin beta, non-erythrocytic 4 [Source:MGI Symbol;Acc:MGI:1890574]
ENSMUSG00000011752	10109.4	1.02828	0.0402295	0.112184	0.358604	0.719891	0.930573	10651	9849.19	8964.85	10972.6	19	41900362	41907099	1	18648	protein_coding	Pgam1	phosphoglycerate mutase 1 [Source:MGI Symbol;Acc:MGI:97552]
ENSMUSG00000011831	105.486	-2.21302	-1.14602	0.375531	-3.05172	0.00227532	0.0255826	64.5062	66.6374	103.634	187.164	5	107892661	108022973	-1	14020	protein_coding	Evi5	ecotropic viral integration site 5 [Source:MGI Symbol;Acc:MGI:104736]
ENSMUSG00000011832	825.289	-1.022	-0.0313899	0.147648	-0.2126	0.831639	0.962298	852.557	779.939	768.389	900.272	8	4216567	4261257	1	213027	protein_coding	Evi5l	ecotropic viral integration site 5 like [Source:MGI Symbol;Acc:MGI:2442167]
ENSMUSG00000011837	1140.81	1.18722	0.247593	0.128836	1.92178	0.054634	0.265972	1285.82	1191.03	990.596	1095.8	8	4303080	4306220	1	102209	protein_coding	Snapc2	small nuclear RNA activating complex, polypeptide 2 [Source:MGI Symbol;Acc:MGI:1914861]
ENSMUSG00000011877	3740.98	-1.05184	-0.0729173	0.0954251	-0.764131	0.444789	0.805245	3559.67	3732.63	3757.92	3913.72	11	77384388	77398612	1	216963	protein_coding	Git1	GIT ArfGAP 1 [Source:MGI Symbol;Acc:MGI:1927140]
ENSMUSG00000011884	2050.97	-1.38813	-0.473145	0.130536	-3.62462	0.000289385	0.00463257	1819.07	1616.19	2148.31	2620.3	5	114807459	114829045	-1	56356	protein_coding	Gltp	glycolipid transfer protein [Source:MGI Symbol;Acc:MGI:1929253]
ENSMUSG00000011958	5096.18	-1.06242	-0.0873602	0.0896137	-0.974854	0.329633	0.720279	4891.72	4992.17	5329.24	5171.59	9	69896748	69915599	1	12175	protein_coding	Bnip2	BCL2/adenovirus E1B interacting protein 2 [Source:MGI Symbol;Acc:MGI:109327]
ENSMUSG00000011960	4384	-1.0002	-0.00028446	0.0935398	-0.00304106	0.997574	0.999262	4332.67	4434.67	4515.1	4253.55	15	98436570	98468804	-1	12455	protein_coding	Ccnt1	cyclin T1 [Source:MGI Symbol;Acc:MGI:1328363]
ENSMUSG00000012076	991.825	-1.01328	-0.0190268	0.129325	-0.147124	0.883034	0.974831	965.443	1005.19	1032.61	964.054	12	55883109	55916521	1	52592	protein_coding	Brms1l	breast cancer metastasis-suppressor 1-like [Source:MGI Symbol;Acc:MGI:1196337]
ENSMUSG00000012114	3670.15	-1.05722	-0.0802763	0.109409	-0.733729	0.463114	0.816826	3474.73	3660.36	3484.36	4061.16	16	17469072	17550755	-1	94112	protein_coding	Med15	mediator complex subunit 15 [Source:MGI Symbol;Acc:MGI:2137379]
ENSMUSG00000012117	2335.15	-1.01215	-0.017425	0.104109	-0.167372	0.867077	0.970929	2340.5	2301.34	2268.75	2430	4	133696339	133728229	-1	67422	protein_coding	Dhdds	dehydrodolichyl diphosphate synthase [Source:MGI Symbol;Acc:MGI:1914672]
ENSMUSG00000012123	149.666	1.40644	0.49205	0.317675	1.54891	0.121403	0.428412	196.744	152.984	95.2316	153.705	4	133788126	133819815	1	230806	protein_coding	Crybg2	crystallin beta-gamma domain containing 2 [Source:MGI Symbol;Acc:MGI:1334463]
ENSMUSG00000012126	866.034	1.08454	0.117084	0.139203	0.841102	0.400291	0.774278	958.992	843.761	829.075	832.307	4	133829881	133854904	1	67586	protein_coding	Ubxn11	UBX domain protein 11 [Source:MGI Symbol;Acc:MGI:1914836]
ENSMUSG00000012296	3161.58	1.02709	0.0385647	0.100156	0.385048	0.700202	0.923689	3121.02	3285.88	3014.74	3224.67	17	46568777	46593952	-1	74094	protein_coding	Tjap1	tight junction associated protein 1 [Source:MGI Symbol;Acc:MGI:1921344]
ENSMUSG00000012405	9935.59	1.17639	0.234368	0.0838596	2.79477	0.00519365	0.049624	10814.5	10667.6	9261.74	8998.53	14	4198305	4201873	1	66480	protein_coding	Rpl15	ribosomal protein L15 [Source:MGI Symbol;Acc:MGI:1913730]
ENSMUSG00000012422	3956.27	1.0047	0.00676275	0.0967608	0.0698915	0.94428	0.988099	3802.64	4127.76	3929.71	3964.96	13	90237242	90292026	1	66074	protein_coding	Tmem167	transmembrane protein 167 [Source:MGI Symbol;Acc:MGI:1913324]
ENSMUSG00000012428	3.03128	1.99493	0.996336	1.80891	0.550794	0.581775		4.30041	3.75422	0.933644	3.13683	5	8010457	8032213	1	117167	protein_coding	Steap4	STEAP family member 4 [Source:MGI Symbol;Acc:MGI:1923560]
ENSMUSG00000012429	1505.33	1.23321	0.302418	0.112609	2.68556	0.00724088	0.0631173	1675.01	1649.98	1327.64	1368.71	13	17869777	17874333	1	66308	protein_coding	Mplkip	M-phase specific PLK1 intereacting protein [Source:MGI Symbol;Acc:MGI:1913558]
ENSMUSG00000012483	692.121	-1.0883	-0.122079	0.156062	-0.782243	0.434072	0.797314	714.944	610.999	683.427	759.114	6	8255936	8259173	-1	68240	protein_coding	Rpa3	replication protein A3 [Source:MGI Symbol;Acc:MGI:1915490]
ENSMUSG00000012519	230.373	-1.49963	-0.584608	0.223931	-2.61067	0.00903658	0.0743337	191.368	177.387	273.558	279.178	8	112038429	112064809	-1	74568	protein_coding	Mlkl	mixed lineage kinase domain-like [Source:MGI Symbol;Acc:MGI:1921818]
ENSMUSG00000012535	4859.63	1.01471	0.0210634	0.0926181	0.227422	0.820095	0.960208	4758.41	5031.59	4911.9	4736.62	6	29540826	29609886	-1	320938	protein_coding	Tnpo3	transportin 3 [Source:MGI Symbol;Acc:MGI:1196412]
ENSMUSG00000012609	764.212	1.08321	0.115316	0.141933	0.812465	0.416525	0.785574	772.999	816.542	764.654	702.651	12	85871433	86108667	1	320244	protein_coding	Ttll5	tubulin tyrosine ligase-like family, member 5 [Source:MGI Symbol;Acc:MGI:2443657]
ENSMUSG00000012640	2007.29	-1.11558	-0.15779	0.130476	-1.20935	0.22653	0.604799	1895.41	1900.57	2358.38	1874.78	7	42945621	42962718	-1	69930	protein_coding	Zfp715	zinc finger protein 715 [Source:MGI Symbol;Acc:MGI:1917180]
ENSMUSG00000012705	3.39815	-1.74166	-0.800467	1.71337	-0.467189	0.640365		2.15021	2.81566	6.5355	2.09122	8	3705770	3710110	1	57264	protein_coding	Retn	resistin [Source:MGI Symbol;Acc:MGI:1888506]
ENSMUSG00000012819	126.446	1.03228	0.0458376	0.313581	0.146175	0.883783	0.974831	137.613	119.196	103.634	145.34	10	60138527	60532269	-1	22295	protein_coding	Cdh23	cadherin 23 (otocadherin) [Source:MGI Symbol;Acc:MGI:1890219]
ENSMUSG00000012848	38293.7	1.1556	0.208641	0.0939781	2.2201	0.0264119	0.162246	42924.6	39191.2	33668.1	37391.1	7	12656217	12660613	1	20103	protein_coding	Rps5	ribosomal protein S5 [Source:MGI Symbol;Acc:MGI:1097682]
ENSMUSG00000012889	2.4316	1.46988	0.555698	2.00087	0.277728	0.781221		1.0751	4.69277	1.86729	2.09122	8	84852618	84859156	1	244550	protein_coding	Podnl1	podocan-like 1 [Source:MGI Symbol;Acc:MGI:2685352]
ENSMUSG00000013033	376.309	1.63048	0.705299	0.192961	3.65514	0.000257043	0.00419027	503.148	429.858	267.956	304.273	8	84626734	84668583	1	330814	protein_coding	Adgrl1	adhesion G protein-coupled receptor L1 [Source:MGI Symbol;Acc:MGI:1929461]
ENSMUSG00000013076	2748.06	1.04568	0.0644469	0.0989723	0.651161	0.514943	0.847949	2776.99	2841.94	2738.38	2634.94	9	14453262	14556352	-1	75723	protein_coding	Amotl1	angiomotin-like 1 [Source:MGI Symbol;Acc:MGI:1922973]
ENSMUSG00000013083	21.2651	-1.0364	-0.0515849	0.688779	-0.0748932	0.9403	0.98741	18.2768	23.4639	22.4074	20.9122	7	30398351	30399961	1	69147	protein_coding	2200002J24Rik	RIKEN cDNA 2200002J24 gene [Source:MGI Symbol;Acc:MGI:1916397]
ENSMUSG00000013089	5434	1.2776	0.353438	0.104028	3.39753	0.000679974	0.009551	6450.62	5742.08	4533.77	5009.52	16	22200059	22258469	-1	104156	protein_coding	Etv5	ets variant 5 [Source:MGI Symbol;Acc:MGI:1096867]
ENSMUSG00000013091	8.08147	-2.2203	-1.15076	1.14192	-1.00774	0.313579		5.37552	4.69277	14.9383	7.31928	7	4785936	4787340	1	78052	protein_coding	Tmem190	transmembrane protein 190 [Source:MGI Symbol;Acc:MGI:1925302]
ENSMUSG00000013150	326.489	-1.06061	-0.0848976	0.193232	-0.439356	0.660404	0.90993	310.705	322.863	322.107	350.28	8	106440486	106485296	-1	70575	protein_coding	Gfod2	glucose-fructose oxidoreductase domain containing 2 [Source:MGI Symbol;Acc:MGI:1917825]
ENSMUSG00000013155	648.303	1.30646	0.385661	0.147713	2.61087	0.0090312	0.0743321	746.122	722.687	546.181	578.223	8	106430283	106434842	-1	102124	protein_coding	Enkd1	enkurin domain containing 1 [Source:MGI Symbol;Acc:MGI:2142593]
ENSMUSG00000013158	6.37344	1.03808	0.0539235	1.27119	0.0424198	0.966164		6.45062	6.56988	9.33644	3.13683	8	106434287	106436878	1	71046	protein_coding	4933405L10Rik	RIKEN cDNA 4933405L10 gene [Source:MGI Symbol;Acc:MGI:1918296]
ENSMUSG00000013160	5854.84	-1.226	-0.293961	0.125444	-2.34337	0.0191104	0.129313	5123.94	5395.75	5606.53	7293.14	8	106251097	106292679	-1	11972	protein_coding	Atp6v0d1	ATPase, H+ transporting, lysosomal V0 subunit D1 [Source:MGI Symbol;Acc:MGI:1201778]
ENSMUSG00000013236	7542.09	1.14502	0.195372	0.0905368	2.15793	0.0309335	0.182164	8380.43	7724.3	7069.55	6994.1	17	56719426	56783483	-1	19280	protein_coding	Ptprs	protein tyrosine phosphatase, receptor type, S [Source:MGI Symbol;Acc:MGI:97815]
ENSMUSG00000013275	1045.61	1.07469	0.103917	0.142523	0.729125	0.465925	0.818788	1147.14	1019.27	923.373	1092.66	1	131755231	131776603	1	98396	protein_coding	Slc41a1	solute carrier family 41, member 1 [Source:MGI Symbol;Acc:MGI:2444823]
ENSMUSG00000013353	4.21035	-2.38316	-1.25287	1.53434	-0.816555	0.414183		2.15021	2.81566	5.60186	6.27367	7	43141468	43155364	-1	74054	protein_coding	4931406B18Rik	RIKEN cDNA 4931406B18 gene [Source:MGI Symbol;Acc:MGI:1921304]
ENSMUSG00000013418	43.8433	-1.21866	-0.285291	0.483743	-0.589757	0.555354	0.868055	38.7037	40.3578	51.3504	44.9613	11	95756769	95805717	-1	14422	protein_coding	B4galnt2	beta-1,4-N-acetyl-galactosaminyl transferase 2 [Source:MGI Symbol;Acc:MGI:1342058]
ENSMUSG00000013419	96.514	-1.33063	-0.412109	0.331706	-1.24239	0.214092	0.58933	84.9331	80.7157	106.435	113.972	9	121588396	121600808	1	270210	protein_coding	Zfp651	zinc finger protein 651 [Source:MGI Symbol;Acc:MGI:2670992]
ENSMUSG00000013465	5136.66	-1.01183	-0.0169613	0.0910308	-0.186325	0.85219	0.967039	5152.97	5059.75	5029.54	5304.39	2	25089724	25101501	-1	58202	protein_coding	Nelfb	negative elongation factor complex member B [Source:MGI Symbol;Acc:MGI:1931035]
ENSMUSG00000013483	4.74571	2.24384	1.16597	1.45433	0.80172	0.422715		7.52572	5.63133	3.73457	2.09122	11	119198594	119236201	1	170720	protein_coding	Card14	caspase recruitment domain family, member 14 [Source:MGI Symbol;Acc:MGI:2386258]
ENSMUSG00000013495	564	-1.01245	-0.0178549	0.175422	-0.101783	0.918929	0.98411	584.856	535.915	499.499	635.732	5	108777636	108796648	1	72392	protein_coding	Tmem175	transmembrane protein 175 [Source:MGI Symbol;Acc:MGI:1919642]
ENSMUSG00000013523	19.0524	1.55605	0.637892	0.754444	0.845513	0.397824	0.772221	17.2016	29.0952	12.1374	17.7754	2	170188911	170269765	-1	76960	protein_coding	Bcas1	breast carcinoma amplified sequence 1 [Source:MGI Symbol;Acc:MGI:1924210]
ENSMUSG00000013593	7090.91	1.01056	0.0151538	0.0907833	0.166923	0.867431	0.970942	7108.58	7147.09	6769.85	7338.1	1	171062422	171078957	-1	226646	protein_coding	Ndufs2	NADH:ubiquinone oxidoreductase core subunit S2 [Source:MGI Symbol;Acc:MGI:2385112]
ENSMUSG00000013622	935.91	-1.08952	-0.123696	0.141106	-0.876616	0.380695	0.759004	937.49	854.085	907.502	1044.57	5	31205656	31211967	1	381629	protein_coding	Atraid	all-trans retinoic acid induced differentiation factor [Source:MGI Symbol;Acc:MGI:1918918]
ENSMUSG00000013629	9200.64	-1.02577	-0.0367069	0.0834672	-0.439777	0.660099	0.909875	9086.77	9080.52	9360.71	9274.57	5	31212124	31235823	1	69719	protein_coding	Cad	carbamoyl-phosphate synthetase 2, aspartate transcarbamylase, and dihydroorotase [Source:MGI Symbol;Acc:MGI:1916969]
ENSMUSG00000013646	864.522	-1.02385	-0.0340069	0.139763	-0.243318	0.807759	0.957153	797.726	910.398	866.421	883.542	11	58221550	58238554	1	79566	protein_coding	Sh3bp5l	SH3 binding domain protein 5 like [Source:MGI Symbol;Acc:MGI:1933124]
ENSMUSG00000013662	6051.87	1.06711	0.0937073	0.0962048	0.974039	0.330037	0.720644	6218.4	6278.93	6178.85	5531.29	19	32649038	32717186	-1	67979	protein_coding	Atad1	ATPase family, AAA domain containing 1 [Source:MGI Symbol;Acc:MGI:1915229]
ENSMUSG00000013663	11074.1	1.03601	0.0510337	0.0928616	0.549567	0.582616	0.87943	11212.3	11328.4	11493.2	10262.7	19	32734897	32803560	1	19211	protein_coding	Pten	phosphatase and tensin homolog [Source:MGI Symbol;Acc:MGI:109583]
ENSMUSG00000013698	1606.76	-1.57242	-0.652988	0.133089	-4.90641	9.27604e-07	2.90521e-05	1260.02	1237.95	1755.25	2173.83	1	172024295	172034371	-1	18611	protein_coding	Pea15a	phosphoprotein enriched in astrocytes 15A [Source:MGI Symbol;Acc:MGI:104799]
ENSMUSG00000013701	1532.19	1.02015	0.0287803	0.130552	0.220451	0.82552	0.960747	1468.59	1626.52	1645.08	1388.57	14	31902119	31923855	-1	53600	protein_coding	Timm23	translocase of inner mitochondrial membrane 23 [Source:MGI Symbol;Acc:MGI:1858317]
ENSMUSG00000013707	1723.91	-1.05801	-0.0813524	0.131931	-0.61663	0.537479	0.859705	1679.31	1670.63	1577.86	1967.84	3	95046832	95049671	-1	69769	protein_coding	Tnfaip8l2	tumor necrosis factor, alpha-induced protein 8-like 2 [Source:MGI Symbol;Acc:MGI:1917019]
ENSMUSG00000013736	3534.13	1.05735	0.0804585	0.0987841	0.814488	0.415365	0.784894	3524.19	3741.08	3544.11	3327.14	6	106746081	106759435	1	70047	protein_coding	Trnt1	tRNA nucleotidyl transferase, CCA-adding, 1 [Source:MGI Symbol;Acc:MGI:1917297]
ENSMUSG00000013787	10363.3	1.03365	0.0477526	0.0829972	0.575352	0.565053	0.87283	10508.1	10561.6	10286	10097.5	17	35117445	35133028	1	110147	protein_coding	Ehmt2	euchromatic histone lysine N-methyltransferase 2 [Source:MGI Symbol;Acc:MGI:2148922]
ENSMUSG00000013822	958.074	-1.03233	-0.0459111	0.134096	-0.342374	0.73207	0.934197	995.545	890.688	992.463	953.598	9	22024285	22028468	-1	66126	protein_coding	Elof1	ELF1 homolog, elongation factor 1 [Source:MGI Symbol;Acc:MGI:1913376]
ENSMUSG00000013833	963.325	-1.04916	-0.0692381	0.154305	-0.44871	0.653641	0.909022	898.786	980.79	866.421	1107.3	10	79730542	79744757	-1	216154	protein_coding	Med16	mediator complex subunit 16 [Source:MGI Symbol;Acc:MGI:2158394]
ENSMUSG00000013846	1996.27	-1.03709	-0.0525469	0.143495	-0.366194	0.714221	0.929097	1804.02	2114.56	1777.66	2288.84	15	66974724	67048679	-1	20442	protein_coding	St3gal1	ST3 beta-galactoside alpha-2,3-sialyltransferase 1 [Source:MGI Symbol;Acc:MGI:98304]
ENSMUSG00000013858	4797.49	1.04669	0.0658285	0.095905	0.686392	0.492466	0.833077	5018.58	4795.08	4496.43	4879.87	10	79810782	79820164	-1	216157	protein_coding	Tmem259	transmembrane protein 259 [Source:MGI Symbol;Acc:MGI:2177957]
ENSMUSG00000013878	389.75	1.11682	0.159399	0.188277	0.846619	0.397207	0.771768	449.393	373.545	375.325	360.736	8	26609396	26641818	1	77733	protein_coding	Rnf170	ring finger protein 170 [Source:MGI Symbol;Acc:MGI:1924983]
ENSMUSG00000013921	706.709	1.88854	0.917273	0.148152	6.19143	5.96215e-10	3.05864e-08	905.237	943.247	517.239	461.115	7	29991153	30007792	1	76686	protein_coding	Clip3	CAP-GLY domain containing linker protein 3 [Source:MGI Symbol;Acc:MGI:1923936]
ENSMUSG00000013928	3.63279	-1.46209	-0.548032	1.66077	-0.329987	0.74141		2.15021	3.75422	6.5355	2.09122	7	29979519	29989662	1		protein_coding	1700020L13Rik	RIKEN cDNA 1700020L13 gene [Source:MGI Symbol;Acc:MGI:1922879]
ENSMUSG00000013936	3.85514	-6.69842	-2.74382	1.82186	-1.50605	0.132054		1.0751	0.938555	10.2701	3.13683	5	122239014	122251535	1	17906	protein_coding	Myl2	myosin, light polypeptide 2, regulatory, cardiac, slow [Source:MGI Symbol;Acc:MGI:97272]
ENSMUSG00000013973	137.162	-1.14699	-0.19785	0.291361	-0.679054	0.497103	0.836994	129.012	126.705	164.321	128.61	1	171156713	171169899	1	21945	protein_coding	Dedd	death effector domain-containing [Source:MGI Symbol;Acc:MGI:1333874]
ENSMUSG00000013974	3.91727	-1.32036	-0.400936	1.62702	-0.246424	0.805354		1.0751	5.63133	3.73457	5.22806	8	3715754	3719259	1	69189	protein_coding	Mcemp1	mast cell expressed membrane protein 1 [Source:MGI Symbol;Acc:MGI:1916439]
ENSMUSG00000013997	658.39	1.22655	0.294602	0.156961	1.87691	0.0605304	0.284149	757.948	692.653	546.181	636.777	1	171165576	171173214	-1	27045	protein_coding	Nit1	nitrilase 1 [Source:MGI Symbol;Acc:MGI:1350916]
ENSMUSG00000014030	10928.5	1.25418	0.32674	0.12156	2.68789	0.00719061	0.0627939	11649.8	12672.4	10909.6	8482	4	44524757	44710487	-1	18507	protein_coding	Pax5	paired box 5 [Source:MGI Symbol;Acc:MGI:97489]
ENSMUSG00000014039	1480.86	1.19488	0.25686	0.121538	2.11341	0.0345656	0.19648	1575.03	1649.98	1432.21	1266.24	16	97592667	97653050	-1	114604	protein_coding	Prdm15	PR domain containing 15 [Source:MGI Symbol;Acc:MGI:1930121]
ENSMUSG00000014074	1109.13	1.13555	0.183389	0.12344	1.48565	0.137371	0.460682	1209.49	1149.73	1031.68	1045.61	16	32096277	32120252	1	70238	protein_coding	Rnf168	ring finger protein 168 [Source:MGI Symbol;Acc:MGI:1917488]
ENSMUSG00000014075	808.39	-1.21878	-0.285433	0.138692	-2.05803	0.0395872	0.215705	762.248	695.469	886.028	889.815	16	32238520	32247917	1	66061	protein_coding	Dynlt2b	dynein light chain Tctex-type 2B [Source:MGI Symbol;Acc:MGI:1913311]
ENSMUSG00000014077	3839.61	1.00163	0.00235033	0.115334	0.0203785	0.983741	0.995918	3757.49	3926.91	3467.55	4206.5	2	119378178	119417508	1	56398	protein_coding	Chp1	calcineurin-like EF hand protein 1 [Source:MGI Symbol;Acc:MGI:1927185]
ENSMUSG00000014158	3.10261	-1.56634	-0.647398	1.86718	-0.346725	0.728798		1.0751	3.75422	6.5355	1.04561	5	114760213	114796482	-1	63873	protein_coding	Trpv4	transient receptor potential cation channel, subfamily V, member 4 [Source:MGI Symbol;Acc:MGI:1926945]
ENSMUSG00000014177	1150.38	1.07363	0.102497	0.121827	0.841335	0.40016	0.774278	1215.94	1166.62	1097.03	1121.94	11	62770281	62807606	1	67510	protein_coding	Tvp23b	trans-golgi network vesicle protein 23B [Source:MGI Symbol;Acc:MGI:1914760]
ENSMUSG00000014195	9539.26	1.02421	0.0345097	0.0966602	0.357021	0.721076	0.930671	9557.67	9749.7	10040.4	8809.28	11	100473644	100511014	-1	56354	protein_coding	Dnajc7	DnaJ heat shock protein family (Hsp40) member C7 [Source:MGI Symbol;Acc:MGI:1928373]
ENSMUSG00000014198	2.81603	-1.20333	-0.267028	1.8947	-0.140934	0.887922		3.22531	1.87711	0.933644	5.22806	11	100518369	100583281	-1	278304	protein_coding	Zfp385c	zinc finger protein 385C [Source:MGI Symbol;Acc:MGI:3608347]
ENSMUSG00000014226	7771.66	1.17918	0.237781	0.0937207	2.53712	0.0111769	0.0870848	8065.42	8755.78	7374.85	6890.58	1	160029937	160040445	-1	12301	protein_coding	Cacybp	calcyclin binding protein [Source:MGI Symbol;Acc:MGI:1270839]
ENSMUSG00000014232	288.728	1.31385	0.393801	0.204717	1.92363	0.0544004	0.265292	339.733	316.293	260.487	238.399	16	3726665	3759011	1	76779	protein_coding	Cluap1	clusterin associated protein 1 [Source:MGI Symbol;Acc:MGI:1924029]
ENSMUSG00000014243	351.883	-1.38302	-0.46782	0.186182	-2.5127	0.011981	0.0915558	298.879	291.89	417.339	399.424	11	62158050	62172201	-1	69747	protein_coding	Zswim7	zinc finger SWIM-type containing 7 [Source:MGI Symbol;Acc:MGI:1916997]
ENSMUSG00000014245	341.653	1.04337	0.0612538	0.201396	0.304145	0.761017	0.943014	348.333	349.142	296.899	372.238	11	62349286	62405243	1	327942	protein_coding	Pigl	phosphatidylinositol glycan anchor biosynthesis, class L [Source:MGI Symbol;Acc:MGI:2681271]
ENSMUSG00000014294	2782.63	-1.12776	-0.173458	0.103291	-1.67931	0.0930919	0.369084	2578.1	2652.36	2818.67	3081.42	18	36875385	36877610	-1	17991	protein_coding	Ndufa2	NADH:ubiquinone oxidoreductase subunit A2 [Source:MGI Symbol;Acc:MGI:1343103]
ENSMUSG00000014301	436.925	-1.05428	-0.0762592	0.171227	-0.445369	0.656053	0.909129	425.741	425.165	464.954	431.838	16	4434328	4442852	-1	66449	protein_coding	Pam16	presequence translocase-asssociated motor 16 homolog (S. cerevisiae) [Source:MGI Symbol;Acc:MGI:1913699]
ENSMUSG00000014303	61.5696	1.17741	0.235622	0.41797	0.563728	0.572939	0.87519	74.1821	59.1289	60.6868	52.2806	16	4412577	4442788	1	83396	protein_coding	Glis2	GLIS family zinc finger 2 [Source:MGI Symbol;Acc:MGI:1932535]
ENSMUSG00000014313	2917.77	1.04951	0.0697194	0.100175	0.695974	0.486445	0.829757	3047.92	2929.23	2933.51	2760.41	15	35926032	35938392	-1	12864	protein_coding	Cox6c	cytochrome c oxidase subunit 6C [Source:MGI Symbol;Acc:MGI:104614]
ENSMUSG00000014349	6965.9	-1.0829	-0.114894	0.0931416	-1.23354	0.217375	0.592008	6525.88	6850.51	6937.91	7549.32	11	95938258	95956214	-1	268470	protein_coding	Ube2z	ubiquitin-conjugating enzyme E2Z [Source:MGI Symbol;Acc:MGI:1343160]
ENSMUSG00000014353	593.235	-1.11548	-0.157669	0.156075	-1.01022	0.312392	0.703525	573.03	549.054	660.086	590.771	2	128660038	128696181	1	72477	protein_coding	Tmem87b	transmembrane protein 87B [Source:MGI Symbol;Acc:MGI:1919727]
ENSMUSG00000014355	7922.23	-1.0083	-0.0119305	0.0900846	-0.132436	0.894639	0.976884	7684.84	8094.09	8204.86	7705.11	2	128452024	128529311	-1	17222	protein_coding	Anapc1	anaphase promoting complex subunit 1 [Source:MGI Symbol;Acc:MGI:103097]
ENSMUSG00000014402	2123.16	1.05719	0.0802395	0.114273	0.702174	0.48257	0.828678	2137.3	2226.25	1927.04	2202.06	7	46538697	46569717	-1	22088	protein_coding	Tsg101	tumor susceptibility gene 101 [Source:MGI Symbol;Acc:MGI:106581]
ENSMUSG00000014418	2741.38	1.06125	0.0857602	0.103105	0.831777	0.405535	0.777549	2798.49	2847.57	2777.59	2541.88	7	46409890	46445488	-1	246694	protein_coding	Hps5	HPS5, biogenesis of lysosomal organelles complex 2 subunit 2 [Source:MGI Symbol;Acc:MGI:2180307]
ENSMUSG00000014426	1644.67	1.2183	0.28487	0.112306	2.53655	0.0111952	0.0871799	1859.93	1753.22	1454.62	1510.91	17	12446508	12537683	-1	26407	protein_coding	Map3k4	mitogen-activated protein kinase kinase kinase 4 [Source:MGI Symbol;Acc:MGI:1346875]
ENSMUSG00000014444	2808.48	-1.06751	-0.0942536	0.100349	-0.939262	0.347596	0.734555	2678.08	2755.6	2988.59	2811.65	8	123208437	123278068	-1	234839	protein_coding	Piezo1	piezo-type mechanosensitive ion channel component 1 [Source:MGI Symbol;Acc:MGI:3603204]
ENSMUSG00000014453	1149.21	1.81671	0.861331	0.352392	2.44424	0.0145157	0.106056	1516.97	1448.19	1015.8	615.865	14	63610285	63654486	-1	12143	protein_coding	Blk	B lymphoid kinase [Source:MGI Symbol;Acc:MGI:88169]
ENSMUSG00000014470	2003.42	1.07671	0.106623	0.110649	0.963616	0.335239	0.725281	2094.3	2060.13	1831.81	2027.44	8	123192886	123202803	-1	68718	protein_coding	Rnf166	ring finger protein 166 [Source:MGI Symbol;Acc:MGI:1915968]
ENSMUSG00000014496	2806.4	1.11078	0.15157	0.10582	1.43234	0.152048	0.489378	2969.43	2938.61	2811.2	2506.33	14	31420725	31552608	-1	105522	protein_coding	Ankrd28	ankyrin repeat domain 28 [Source:MGI Symbol;Acc:MGI:2145661]
ENSMUSG00000014498	4662.66	-1.0495	-0.0697087	0.0937846	-0.743285	0.457309	0.812697	4424.05	4675.88	4890.42	4660.29	10	128212984	128244573	1	237615	protein_coding	Ankrd52	ankyrin repeat domain 52 [Source:MGI Symbol;Acc:MGI:2444029]
ENSMUSG00000014503	375.333	-1.06207	-0.0868816	0.181331	-0.479133	0.631844	0.901037	368.76	359.466	397.732	375.375	18	34541542	34577169	1	53871	protein_coding	Pkd2l2	polycystic kidney disease 2-like 2 [Source:MGI Symbol;Acc:MGI:1858231]
ENSMUSG00000014504	2096.83	1.00092	0.00133288	0.113963	0.0116958	0.990668	0.99817	2043.77	2152.11	2226.74	1964.7	18	34463900	34469652	1	66384	protein_coding	Srp19	signal recognition particle 19 [Source:MGI Symbol;Acc:MGI:1913634]
ENSMUSG00000014543	4.97613	-53.8151	-5.74994	2.01702	-2.85071	0.00436217		0	0	8.40279	11.5017	6	129808117	129853635	-1	170733	protein_coding	Klra17	killer cell lectin-like receptor, subfamily A, member 17 [Source:MGI Symbol;Acc:MGI:2180674]
ENSMUSG00000014547	1554.57	-1.00266	-0.00382837	0.12527	-0.030561	0.97562	0.993882	1611.58	1493.24	1441.55	1671.93	14	63075127	63198958	1	268752	protein_coding	Wdfy2	WD repeat and FYVE domain containing 2 [Source:MGI Symbol;Acc:MGI:2442811]
ENSMUSG00000014550	1824.57	-1.07644	-0.106261	0.110863	-0.958489	0.337816	0.727748	1697.59	1817.04	1939.18	1844.46	6	92163693	92191906	-1	78287	protein_coding	Rbsn	rabenosyn, RAB effector [Source:MGI Symbol;Acc:MGI:1925537]
ENSMUSG00000014551	866.918	1.07006	0.0976975	0.135363	0.721744	0.470452	0.820768	875.134	916.968	806.668	868.903	6	92146506	92161014	-1	64658	protein_coding	Mrps25	mitochondrial ribosomal protein S25 [Source:MGI Symbol;Acc:MGI:1928140]
ENSMUSG00000014554	935.805	1.13458	0.182155	0.149431	1.21899	0.222847	0.599549	1014.9	974.22	779.592	974.51	6	83457199	83483951	-1	27369	protein_coding	Dguok	deoxyguanosine kinase [Source:MGI Symbol;Acc:MGI:1351602]
ENSMUSG00000014592	346.407	1.16443	0.219621	0.190894	1.15049	0.249943	0.635499	394.563	351.019	312.771	327.276	4	151001779	151946333	-1	100072	protein_coding	Camta1	calmodulin binding transcription activator 1 [Source:MGI Symbol;Acc:MGI:2140230]
ENSMUSG00000014599	6866.25	-1.12073	-0.164438	0.148379	-1.10823	0.267763	0.657147	5716.32	7234.38	8359.84	6154.47	3	107648364	107667785	-1	12977	protein_coding	Csf1	colony stimulating factor 1 (macrophage) [Source:MGI Symbol;Acc:MGI:1339753]
ENSMUSG00000014601	3317.21	-1.10862	-0.148767	0.0998556	-1.48982	0.136271	0.45839	3250.04	3042.79	3385.39	3590.63	3	107519848	107539010	-1	229707	protein_coding	Strip1	striatin interacting protein 1 [Source:MGI Symbol;Acc:MGI:2443884]
ENSMUSG00000014606	2075.24	1.04786	0.0674428	0.130633	0.516279	0.60566	0.889863	2164.18	2082.65	1793.53	2260.61	11	70535022	70538305	-1	67863	protein_coding	Slc25a11	solute carrier family 25 (mitochondrial carrier oxoglutarate carrier), member 11 [Source:MGI Symbol;Acc:MGI:1915113]
ENSMUSG00000014633	348.899	-1.51575	-0.600032	0.188551	-3.18234	0.00146092	0.0178566	282.752	272.181	436.012	404.652	8	117615424	117648194	-1	66531	protein_coding	Cmc2	COX assembly mitochondrial protein 2 [Source:MGI Symbol;Acc:MGI:1913781]
ENSMUSG00000014668	3547.84	-1.21621	-0.282393	0.0962119	-2.93512	0.00333421	0.0352196	3103.82	3299.02	3864.35	3924.18	5	110283708	110319838	1	231600	protein_coding	Chfr	checkpoint with forkhead and ring finger domains [Source:MGI Symbol;Acc:MGI:2444898]
ENSMUSG00000014686	257.197	-1.09078	-0.125361	0.22496	-0.557259	0.57735	0.876218	260.175	231.823	240.88	295.908	7	19586022	19595224	-1	330483	protein_coding	Ceacam16	carcinoembryonic antigen-related cell adhesion molecule 16 [Source:MGI Symbol;Acc:MGI:2685615]
ENSMUSG00000014747	28.8337	-1.31272	-0.392554	0.598789	-0.655579	0.512095	0.846181	22.5772	27.2181	28.943	36.5964	6	83739626	83745308	1	75305	protein_coding	Ankrd53	ankyrin repeat domain 53 [Source:MGI Symbol;Acc:MGI:1922555]
ENSMUSG00000014748	4171.13	1.01215	0.017422	0.0945563	0.18425	0.853818	0.967531	4148.82	4243.21	4012.8	4279.69	6	83745867	83752795	-1	21766	protein_coding	Tex261	testis expressed gene 261 [Source:MGI Symbol;Acc:MGI:1096575]
ENSMUSG00000014763	2196.75	1.10766	0.147511	0.105601	1.39687	0.162452	0.507955	2271.69	2346.39	2152.98	2015.94	17	15616464	15653845	1	67544	protein_coding	Fam120b	family with sequence similarity 120, member B [Source:MGI Symbol;Acc:MGI:1914794]
ENSMUSG00000014767	1986.09	1.07376	0.102674	0.109122	0.940914	0.346749	0.734552	1967.44	2145.54	1915.84	1915.56	17	15720150	15748641	1	21374	protein_coding	Tbp	TATA box binding protein [Source:MGI Symbol;Acc:MGI:101838]
ENSMUSG00000014769	8587.92	1.05587	0.0784273	0.086329	0.90847	0.36363	0.746398	8854.55	8787.69	8138.57	8570.88	17	15695283	15720013	-1	19170	protein_coding	Psmb1	proteasome (prosome, macropain) subunit, beta type 1 [Source:MGI Symbol;Acc:MGI:104884]
ENSMUSG00000014773	14.1311	1.04039	0.0571219	0.971708	0.058785	0.953123	0.989945	4.30041	24.4024	12.1374	15.6842	17	15587616	15597134	-1	13388	protein_coding	Dll1	delta like canonical Notch ligand 1 [Source:MGI Symbol;Acc:MGI:104659]
ENSMUSG00000014778	1643.01	1.08158	0.113136	0.114145	0.991166	0.321605	0.712228	1753.49	1661.24	1520.91	1636.38	8	106055795	106074585	-1	234686	protein_coding	Fhod1	formin homology 2 domain containing 1 [Source:MGI Symbol;Acc:MGI:2679008]
ENSMUSG00000014782	87.0718	-1.29579	-0.373828	0.380746	-0.981831	0.326183	0.716832	86.0082	65.6988	78.4261	118.154	8	106099906	106109494	1	102075	protein_coding	Plekhg4	pleckstrin homology domain containing, family G (with RhoGef domain) member 4 [Source:MGI Symbol;Acc:MGI:2142544]
ENSMUSG00000014786	947.611	1.33698	0.418981	0.154647	2.70927	0.00674307	0.0600022	1219.17	949.817	787.062	834.398	8	106075475	106096513	1	277973	protein_coding	Slc9a5	solute carrier family 9 (sodium/hydrogen exchanger), member 5 [Source:MGI Symbol;Acc:MGI:2685542]
ENSMUSG00000014791	218.816	1.0783	0.108765	0.229271	0.474392	0.63522	0.903791	235.448	218.683	202.601	218.533	8	106032233	106037392	1	234683	protein_coding	Elmo3	engulfment and cell motility 3 [Source:MGI Symbol;Acc:MGI:2679007]
ENSMUSG00000014813	3.38499	-5.4124	-2.43627	2.09606	-1.16231	0.24511		2.15021	0	0.933644	10.4561	14	69266687	69279253	1	20855	protein_coding	Stc1	stanniocalcin 1 [Source:MGI Symbol;Acc:MGI:109131]
ENSMUSG00000014837	194.137	-1.02844	-0.0404578	0.249306	-0.162282	0.871084	0.972443	201.044	182.08	215.672	177.754	8	106007041	106016496	-1	74356	protein_coding	4931428F04Rik	RIKEN cDNA 4931428F04 gene [Source:MGI Symbol;Acc:MGI:1921606]
ENSMUSG00000014846	37.6054	1.39589	0.481181	0.52708	0.912919	0.361285	0.744361	39.7788	47.8663	34.5448	28.2315	8	106194125	106198158	-1	67971	protein_coding	Tppp3	tubulin polymerization-promoting protein family member 3 [Source:MGI Symbol;Acc:MGI:1915221]
ENSMUSG00000014850	1441.92	-1.17858	-0.23705	0.118924	-1.99329	0.0462297	0.238016	1301.95	1344.95	1485.43	1635.34	13	92348380	92491511	-1	17686	protein_coding	Msh3	mutS homolog 3 [Source:MGI Symbol;Acc:MGI:109519]
ENSMUSG00000014852	14.3745	-6.13528	-2.61713	0.969824	-2.69856	0.00696396	0.0613951	4.30041	3.75422	14.9383	34.5052	2	26863428	26899640	1	279028	protein_coding	Adamts13	a disintegrin-like and metallopeptidase (reprolysin type) with thrombospondin type 1 motif, 13 [Source:MGI Symbol;Acc:MGI:2685556]
ENSMUSG00000014856	1310.59	-1.02881	-0.0409711	0.136375	-0.300429	0.76385	0.943897	1242.82	1340.26	1200.67	1458.63	8	106052986	106061851	1	66320	protein_coding	Tmem208	transmembrane protein 208 [Source:MGI Symbol;Acc:MGI:1913570]
ENSMUSG00000014859	5481.07	1.03056	0.0434223	0.0919386	0.472297	0.636715	0.904529	5385.19	5741.14	5310.56	5487.37	8	106024295	106032002	1	104394	protein_coding	E2f4	E2F transcription factor 4 [Source:MGI Symbol;Acc:MGI:103012]
ENSMUSG00000014867	7638.8	-1.03191	-0.0453182	0.0989906	-0.457803	0.647094	0.907321	7144.06	7892.31	7386.05	8132.77	2	26810052	26823940	-1	20932	protein_coding	Surf4	surfeit gene 4 [Source:MGI Symbol;Acc:MGI:98445]
ENSMUSG00000014873	1879.88	1.12235	0.166527	0.110326	1.5094	0.131197	0.449992	1982.49	1994.43	1847.68	1694.94	2	26806379	26810195	1	20931	protein_coding	Surf2	surfeit gene 2 [Source:MGI Symbol;Acc:MGI:98444]
ENSMUSG00000014905	744.619	1.00254	0.00366153	0.150353	0.0243528	0.980571	0.99495	716.019	775.246	799.199	688.012	12	44252342	44257109	-1	27362	protein_coding	Dnajb9	DnaJ heat shock protein family (Hsp40) member B9 [Source:MGI Symbol;Acc:MGI:1351618]
ENSMUSG00000014907	2451.04	1.23361	0.302883	0.106243	2.85084	0.00436039	0.0431308	2634	2780.94	2286.49	2102.72	8	67312869	67343216	1	234344	protein_coding	Naf1	nuclear assembly factor 1 ribonucleoprotein [Source:MGI Symbol;Acc:MGI:2682306]
ENSMUSG00000014932	21.4231	-1.19067	-0.251778	0.715593	-0.351846	0.724954	0.93186	20.427	18.7711	30.8102	15.6842	5	32768515	32844401	1	22612	protein_coding	Yes1	YES proto-oncogene 1, Src family tyrosine kinase [Source:MGI Symbol;Acc:MGI:99147]
ENSMUSG00000014956	10334.7	-1.14539	-0.195844	0.0871899	-2.24618	0.0246925	0.155011	9386.73	9881.1	10764.9	11306.2	5	32616187	32674777	1	19046	protein_coding	Ppp1cb	protein phosphatase 1 catalytic subunit beta [Source:MGI Symbol;Acc:MGI:104871]
ENSMUSG00000014959	6282.65	-1.03854	-0.0545559	0.0915112	-0.596166	0.551064	0.866518	5933.49	6393.43	6319.83	6483.84	2	70491920	70542980	1	70231	protein_coding	Gorasp2	golgi reassembly stacking protein 2 [Source:MGI Symbol;Acc:MGI:2135962]
ENSMUSG00000014980	826.338	1.27733	0.353129	0.142324	2.48116	0.0130954	0.0976733	989.095	865.347	735.711	715.198	1	152246486	152262439	-1	66637	protein_coding	Tsen15	tRNA splicing endonuclease subunit 15 [Source:MGI Symbol;Acc:MGI:1913887]
ENSMUSG00000015002	5879.3	1.20042	0.263539	0.0881375	2.99009	0.00278899	0.0304492	6405.46	6424.41	5439.41	5247.92	15	65658883	65745665	1	76740	protein_coding	Efr3a	EFR3 homolog A [Source:MGI Symbol;Acc:MGI:1923990]
ENSMUSG00000015013	1326.61	1.06589	0.0920548	0.119885	0.767862	0.442569	0.803462	1356.78	1380.61	1229.61	1339.43	8	123338379	123343399	1	59005	protein_coding	Trappc2l	trafficking protein particle complex 2-like [Source:MGI Symbol;Acc:MGI:1916295]
ENSMUSG00000015016	590.058	1.08574	0.118677	0.15148	0.78345	0.433363	0.796756	606.358	622.262	573.257	558.357	8	123502225	123544619	1	257633	protein_coding	Acsf3	acyl-CoA synthetase family member 3 [Source:MGI Symbol;Acc:MGI:2182591]
ENSMUSG00000015023	2333.66	1.05396	0.0758139	0.100859	0.751681	0.452243	0.80935	2389.95	2399.88	2262.22	2282.57	8	111701628	111724432	-1	13680	protein_coding	Ddx19a	DEAD box helicase 19a [Source:MGI Symbol;Acc:MGI:99526]
ENSMUSG00000015027	2089.9	1.04719	0.0665254	0.118288	0.562401	0.573843	0.875443	2223.31	2052.62	1896.23	2187.42	8	123304981	123338202	-1	50917	protein_coding	Galns	galactosamine (N-acetyl)-6-sulfate sulfatase [Source:MGI Symbol;Acc:MGI:1355303]
ENSMUSG00000015083	80.2039	-1.00808	-0.0116141	0.371689	-0.0312467	0.975073	0.993537	91.3838	68.5145	79.3597	81.5577	2	25388663	25391731	-1	69379	protein_coding	C8g	complement component 8, gamma polypeptide [Source:MGI Symbol;Acc:MGI:88237]
ENSMUSG00000015087	6854.17	1.17986	0.238613	0.0872871	2.73366	0.00626355	0.0565973	7560.12	7279.43	6220.87	6356.27	2	25473030	25498533	-1	227624	protein_coding	Rabl6	RAB, member RAS oncogene family-like 6 [Source:MGI Symbol;Acc:MGI:2442633]
ENSMUSG00000015092	4534.43	-1.00879	-0.012626	0.0929621	-0.135819	0.891964	0.976044	4544.46	4484.41	4416.13	4692.7	2	25447859	25452094	1	59022	protein_coding	Edf1	endothelial differentiation-related factor 1 [Source:MGI Symbol;Acc:MGI:1891227]
ENSMUSG00000015093	120.483	-1.1949	-0.256889	0.30412	-0.844695	0.398281	0.772486	118.261	101.364	123.241	139.066	2	25346850	25348788	1	69454	protein_coding	Clic3	chloride intracellular channel 3 [Source:MGI Symbol;Acc:MGI:1916704]
ENSMUSG00000015095	1699.43	1.14955	0.201072	0.116637	1.72391	0.0847248	0.349875	1894.33	1741.02	1513.44	1648.93	2	25390762	25395483	1	30839	protein_coding	Fbxw5	F-box and WD-40 domain protein 5 [Source:MGI Symbol;Acc:MGI:1354731]
ENSMUSG00000015120	6766.48	1.01449	0.0207534	0.0953877	0.217569	0.827765	0.961693	6718.32	6912.45	7078.89	6356.27	17	25480890	25493596	-1	22196	protein_coding	Ube2i	ubiquitin-conjugating enzyme E2I [Source:MGI Symbol;Acc:MGI:107365]
ENSMUSG00000015126	1038.91	-1.00097	-0.00139447	0.124749	-0.0111782	0.991081	0.998373	1039.62	1037.1	1027.01	1051.89	17	25459144	25461772	1	68327	protein_coding	Tsr3	TSR3 20S rRNA accumulation [Source:MGI Symbol;Acc:MGI:1915577]
ENSMUSG00000015127	467.982	-1.11535	-0.157498	0.166991	-0.943148	0.345605	0.733925	459.069	426.104	499.499	487.255	17	25407371	25453417	1	74154	protein_coding	Unkl	unkempt family like zinc finger [Source:MGI Symbol;Acc:MGI:1921404]
ENSMUSG00000015133	1967.75	1.13454	0.182108	0.119111	1.5289	0.12629	0.439634	2123.33	2061.07	1989.59	1697.03	7	65876660	66038098	-1	233328	protein_coding	Lrrk1	leucine-rich repeat kinase 1 [Source:MGI Symbol;Acc:MGI:2142227]
ENSMUSG00000015143	4345.49	1.17174	0.228655	0.0969472	2.35855	0.0183463	0.125581	4849.79	4528.53	3875.55	4128.07	12	80214321	80307145	-1	109711	protein_coding	Actn1	actinin, alpha 1 [Source:MGI Symbol;Acc:MGI:2137706]
ENSMUSG00000015149	2019.41	1.04028	0.0569687	0.108846	0.52339	0.600703	0.887826	2006.14	2111.75	1909.3	2050.44	7	28466160	28488086	1	64383	protein_coding	Sirt2	sirtuin 2 [Source:MGI Symbol;Acc:MGI:1927664]
ENSMUSG00000015165	12926	-1.01048	-0.0150399	0.0843471	-0.178309	0.85848	0.968872	12965.7	12752.1	13334.3	12651.9	7	28507966	28521691	1	15388	protein_coding	Hnrnpl	heterogeneous nuclear ribonucleoprotein L [Source:MGI Symbol;Acc:MGI:104816]
ENSMUSG00000015176	17037.5	1.00935	0.0134282	0.106514	0.12607	0.899676	0.978272	16502.8	17731.2	18506.7	15409.2	19	46064302	46073969	1	70769	protein_coding	Nolc1	nucleolar and coiled-body phosphoprotein 1 [Source:MGI Symbol;Acc:MGI:1918019]
ENSMUSG00000015189	1299.42	1.08539	0.118218	0.120375	0.98208	0.326061	0.716832	1321.3	1383.43	1201.6	1291.33	6	4600839	4643355	1	213819	protein_coding	Casd1	CAS1 domain containing 1 [Source:MGI Symbol;Acc:MGI:2384865]
ENSMUSG00000015202	162.127	1.44399	0.530056	0.265846	1.99384	0.0461691	0.237961	184.918	198.035	122.307	143.249	10	7069063	7162237	-1	215748	protein_coding	Cnksr3	Cnksr family member 3 [Source:MGI Symbol;Acc:MGI:2674130]
ENSMUSG00000015214	2386.78	1.16532	0.220723	0.102186	2.16	0.0307723	0.181477	2541.54	2596.04	2152.05	2257.48	X	70408366	70462802	1	53332	protein_coding	Mtmr1	myotubularin related protein 1 [Source:MGI Symbol;Acc:MGI:1858271]
ENSMUSG00000015217	277.07	-1.48061	-0.566196	0.236708	-2.39196	0.0167589	0.117641	216.096	230.884	388.396	272.905	X	70599524	70604282	1	15354	protein_coding	Hmgb3	high mobility group box 3 [Source:MGI Symbol;Acc:MGI:1098219]
ENSMUSG00000015243	454.427	-2.08663	-1.06117	0.170295	-6.23137	4.62368e-10	2.39778e-08	290.278	298.46	598.466	630.504	4	53030787	53159895	-1	11303	protein_coding	Abca1	ATP-binding cassette, sub-family A (ABC1), member 1 [Source:MGI Symbol;Acc:MGI:99607]
ENSMUSG00000015247	1108.71	-1.01868	-0.0267044	0.143588	-0.18598	0.852461	0.967203	1109.51	1086.85	995.264	1243.23	4	53011880	53022060	1	66536	protein_coding	Nipsnap3b	nipsnap homolog 3B [Source:MGI Symbol;Acc:MGI:1913786]
ENSMUSG00000015289	871.661	1.08857	0.122439	0.134879	0.907764	0.364003	0.746842	870.834	946.063	829.075	840.672	X	73394882	73397224	-1	66192	protein_coding	Lage3	L antigen family, member 3 [Source:MGI Symbol;Acc:MGI:1913442]
ENSMUSG00000015290	1309.25	-1.07872	-0.109319	0.123244	-0.887014	0.375071	0.7549	1213.79	1305.53	1420.07	1297.6	X	73409324	73416824	-1	27643	protein_coding	Ubl4a	ubiquitin-like 4A [Source:MGI Symbol;Acc:MGI:95049]
ENSMUSG00000015290	1309.25	-1.07872	-0.109319	0.123244	-0.887014	0.375071	0.7549	1213.79	1305.53	1420.07	1297.6	X	73409324	73416824	-1	100169864	protein_coding	Ubl4a	ubiquitin-like 4A [Source:MGI Symbol;Acc:MGI:95049]
ENSMUSG00000015291	5932.38	1.16885	0.225085	0.0893722	2.51851	0.0117852	0.0905431	6563.5	6225.43	5489.82	5450.77	X	73348604	73355468	1	14567	protein_coding	Gdi1	guanosine diphosphate (GDP) dissociation inhibitor 1 [Source:MGI Symbol;Acc:MGI:99846]
ENSMUSG00000015312	1833.28	-1.24057	-0.310999	0.172114	-1.80694	0.0707714	0.313882	1567.5	1704.42	1604	2457.19	10	80765907	80768038	1	17873	protein_coding	Gadd45b	growth arrest and DNA-damage-inducible 45 beta [Source:MGI Symbol;Acc:MGI:107776]
ENSMUSG00000015314	1802.7	1.46441	0.550315	0.172716	3.18625	0.0014413	0.0176621	1927.66	2357.65	1744.98	1180.5	1	171745082	171780737	1	30925	protein_coding	Slamf6	SLAM family member 6 [Source:MGI Symbol;Acc:MGI:1353620]
ENSMUSG00000015316	196.417	1.17877	0.237284	0.256728	0.924262	0.35535	0.740326	188.143	236.516	163.388	197.621	1	171594695	171628752	1	27218	protein_coding	Slamf1	signaling lymphocytic activation molecule family member 1 [Source:MGI Symbol;Acc:MGI:1351314]
ENSMUSG00000015335	690.812	-1.06159	-0.0862232	0.160383	-0.537607	0.590848	0.884049	709.568	630.709	646.081	776.889	2	29980956	29983660	-1	66220	protein_coding	Zdhhc12	zinc finger, DHHC domain containing 12 [Source:MGI Symbol;Acc:MGI:1913470]
ENSMUSG00000015337	203.284	1.29462	0.372526	0.24716	1.50722	0.131754	0.450607	233.297	225.253	155.918	198.666	2	30061505	30064081	1	13804	protein_coding	Endog	endonuclease G [Source:MGI Symbol;Acc:MGI:1261433]
ENSMUSG00000015340	7459.48	-1.46369	-0.54961	0.120387	-4.56535	4.98667e-06	0.000136471	5790.51	6319.29	7831.4	9896.71	X	9301491	9354010	-1	13058	protein_coding	Cybb	cytochrome b-245, beta polypeptide [Source:MGI Symbol;Acc:MGI:88574]
ENSMUSG00000015341	5393.23	-1.0365	-0.0517239	0.100672	-0.513788	0.6074	0.890807	5244.35	5347.88	5129.44	5851.24	8	23731362	23747090	-1	57437	protein_coding	Golga7	golgi autoantigen, golgin subfamily a, 7 [Source:MGI Symbol;Acc:MGI:1931029]
ENSMUSG00000015341	5393.23	-1.0365	-0.0517239	0.100672	-0.513788	0.6074	0.890807	5244.35	5347.88	5129.44	5851.24	8	23731362	23747090	-1	628040	protein_coding	Golga7	golgi autoantigen, golgin subfamily a, 7 [Source:MGI Symbol;Acc:MGI:1931029]
ENSMUSG00000015342	387.919	1.39456	0.479812	0.19817	2.42121	0.0154688	0.111091	421.44	482.417	361.32	286.498	X	9138995	9179489	1	22439	protein_coding	Xk	X-linked Kx blood group [Source:MGI Symbol;Acc:MGI:103569]
ENSMUSG00000015355	890.877	1.09952	0.136873	0.134827	1.01517	0.310023	0.700894	893.411	972.343	830.943	866.812	1	171509577	171532826	1	12506	protein_coding	Cd48	CD48 antigen [Source:MGI Symbol;Acc:MGI:88339]
ENSMUSG00000015357	2612.2	1.01435	0.0205609	0.102843	0.199925	0.841539	0.964599	2549.07	2712.42	2659.02	2528.29	9	65201542	65237940	1	270166	protein_coding	Clpx	caseinolytic mitochondrial matrix peptidase chaperone subunit [Source:MGI Symbol;Acc:MGI:1346017]
ENSMUSG00000015363	3663.24	-1.01397	-0.0200209	0.093454	-0.214232	0.830366	0.962298	3588.69	3686.64	3663.62	3714.01	15	88959327	88971280	1	67976	protein_coding	Trabd	TraB domain containing [Source:MGI Symbol;Acc:MGI:1915226]
ENSMUSG00000015377	763.866	1.14112	0.190444	0.145629	1.30773	0.190964	0.556163	854.707	774.308	747.848	678.602	15	89066416	89080699	-1	69440	protein_coding	Dennd6b	DENN/MADD domain containing 6B [Source:MGI Symbol;Acc:MGI:1916690]
ENSMUSG00000015451	43.7167	-1.42873	-0.514736	0.485787	-1.05959	0.28933	0.679896	34.4033	37.5422	48.5495	54.3718	17	35028069	35042440	-1	625018	lncRNA	C4a	complement component 4A (Rodgers blood group) [Source:MGI Symbol;Acc:MGI:98320]
ENSMUSG00000015452	249.106	1.06189	0.0866305	0.22135	0.391373	0.695522	0.92176	274.151	239.331	253.951	228.989	17	34816836	34819910	1	11596	protein_coding	Ager	advanced glycosylation end product-specific receptor [Source:MGI Symbol;Acc:MGI:893592]
ENSMUSG00000015461	4634.84	1.04816	0.0678555	0.0978711	0.693314	0.488112	0.831074	4691.75	4795.08	4292.89	4759.62	17	34866120	34874048	1	12915	protein_coding	Atf6b	activating transcription factor 6 beta [Source:MGI Symbol;Acc:MGI:105121]
ENSMUSG00000015467	8.82233	1.03244	0.0460631	1.15878	0.0397514	0.968291		7.52572	10.3241	2.80093	14.6386	17	34832323	34834945	-1	81701	protein_coding	Egfl8	EGF-like domain 8 [Source:MGI Symbol;Acc:MGI:1932094]
ENSMUSG00000015468	42.6644	-1.70801	-0.772312	0.522623	-1.47776	0.139472	0.464896	38.7037	24.4024	44.8149	62.7367	17	34783242	34807477	1	18132	protein_coding	Notch4	notch 4 [Source:MGI Symbol;Acc:MGI:107471]
ENSMUSG00000015474	228.644	1.17601	0.2339	0.313236	0.746722	0.455231	0.811019	252.649	241.209	136.312	284.406	17	34835636	34847484	-1	54397	protein_coding	Ppt2	palmitoyl-protein thioesterase 2 [Source:MGI Symbol;Acc:MGI:1860075]
ENSMUSG00000015478	641.481	-1.25424	-0.326813	0.155045	-2.10786	0.0350433	0.198722	589.156	549.054	667.555	760.16	17	34820065	34822664	-1	54197	protein_coding	Rnf5	ring finger protein 5 [Source:MGI Symbol;Acc:MGI:1860076]
ENSMUSG00000015488	887.656	1.01694	0.0242363	0.134221	0.18057	0.856705	0.968334	879.434	910.398	845.881	914.91	2	26899938	26911101	1	381356	protein_coding	Cacfd1	calcium channel flower domain containing 1 [Source:MGI Symbol;Acc:MGI:1924317]
ENSMUSG00000015501	1265.7	-1.33209	-0.413691	0.119177	-3.47122	0.000518091	0.00755905	1054.68	1115.94	1447.15	1445.04	10	13841819	14027118	1	15273	protein_coding	Hivep2	human immunodeficiency virus type I enhancer binding protein 2 [Source:MGI Symbol;Acc:MGI:1338076]
ENSMUSG00000015522	3809.19	1.01262	0.0180983	0.0942125	0.192101	0.847663	0.966737	3920.9	3745.77	3828.87	3741.2	3	95341699	95404551	1	11863	protein_coding	Arnt	aryl hydrocarbon receptor nuclear translocator [Source:MGI Symbol;Acc:MGI:88071]
ENSMUSG00000015536	1347.7	-1.02602	-0.0370553	0.12295	-0.301385	0.763121	0.943843	1257.87	1402.2	1328.57	1402.17	13	114954772	114968811	1	17434	protein_coding	Mocs2	molybdenum cofactor synthesis 2 [Source:MGI Symbol;Acc:MGI:1336894]
ENSMUSG00000015542	399.03	1.00864	0.0124159	0.196727	0.0631125	0.949677	0.989658	419.29	381.992	347.315	447.522	11	115073658	115078685	-1	66176	protein_coding	Nat9	N-acetyltransferase 9 (GCN5-related, putative) [Source:MGI Symbol;Acc:MGI:1913426]
ENSMUSG00000015575	3268.5	-1.02646	-0.0376783	0.108642	-0.346813	0.728732	0.933112	3162.95	3287.76	3074.49	3548.81	17	26882205	26918621	1	11974	protein_coding	Atp6v0e	ATPase, H+ transporting, lysosomal V0 subunit E [Source:MGI Symbol;Acc:MGI:1328318]
ENSMUSG00000015597	3183.08	1.15781	0.211397	0.133413	1.58452	0.113075	0.414131	3601.6	3231.44	3331.24	2568.02	17	46694657	46731846	1	57908	protein_coding	Zfp318	zinc finger protein 318 [Source:MGI Symbol;Acc:MGI:1889348]
ENSMUSG00000015599	796.232	1.19221	0.253641	0.142166	1.78412	0.0744042	0.323506	886.96	845.638	767.455	684.876	17	46753374	46798601	-1	106763	protein_coding	Ttbk1	tau tubulin kinase 1 [Source:MGI Symbol;Acc:MGI:2147036]
ENSMUSG00000015605	1688.02	-1.06223	-0.0870988	0.115296	-0.755435	0.449988	0.807204	1550.3	1723.19	1718.84	1759.76	17	46859255	46867101	-1	20807	protein_coding	Srf	serum response factor [Source:MGI Symbol;Acc:MGI:106658]
ENSMUSG00000015619	11.6887	1.37176	0.456023	1.00987	0.451569	0.65158	0.908803	5.37552	21.5868	9.33644	10.4561	2	9861889	9894845	-1	14462	protein_coding	Gata3	GATA binding protein 3 [Source:MGI Symbol;Acc:MGI:95663]
ENSMUSG00000015647	246.137	3.17223	1.6655	0.267728	6.22086	4.94447e-10	2.55488e-08	393.488	355.712	147.516	87.8314	2	179818166	179867652	-1	16776	protein_coding	Lama5	laminin, alpha 5 [Source:MGI Symbol;Acc:MGI:105382]
ENSMUSG00000015656	56766.6	1.13401	0.181439	0.0872083	2.08053	0.0374772	0.208396	57582.5	63079.3	51981.5	54423	9	40712280	40721383	1	15481	protein_coding	Hspa8	heat shock protein 8 [Source:MGI Symbol;Acc:MGI:105384]
ENSMUSG00000015659	287.903	1.0997	0.137109	0.202521	0.677009	0.4984	0.838065	301.029	302.215	283.828	264.54	17	6092471	6130016	-1	321007	protein_coding	Serac1	serine active site containing 1 [Source:MGI Symbol;Acc:MGI:2447813]
ENSMUSG00000015668	774.894	-1.19279	-0.254335	0.140107	-1.8153	0.0694785	0.310473	692.366	720.81	812.27	874.131	X	99666489	99670174	-1	72621	protein_coding	Pdzd11	PDZ domain containing 11 [Source:MGI Symbol;Acc:MGI:1919871]
ENSMUSG00000015671	8181.81	1.05286	0.0743116	0.08538	0.870363	0.384102	0.761237	8406.23	8378.48	7828.6	8113.95	13	14787825	14848821	1	19166	protein_coding	Psma2	proteasome subunit alpha 2 [Source:MGI Symbol;Acc:MGI:104885]
ENSMUSG00000015672	2131.64	1.16787	0.223885	0.102908	2.17559	0.0295862	0.176852	2291.04	2302.27	1955.98	1977.25	13	14782769	14787750	-1	75398	protein_coding	Mrpl32	mitochondrial ribosomal protein L32 [Source:MGI Symbol;Acc:MGI:2137226]
ENSMUSG00000015697	4503.47	1.09073	0.125293	0.095142	1.3169	0.187871	0.55126	4704.65	4693.71	4484.29	4131.21	3	95230836	95264513	-1	84505	protein_coding	Setdb1	SET domain, bifurcated 1 [Source:MGI Symbol;Acc:MGI:1934229]
ENSMUSG00000015702	290.759	-1.06752	-0.0942594	0.207009	-0.45534	0.648865	0.907463	298.879	263.734	285.695	314.729	3	95203407	95214487	-1	71790	protein_coding	Anxa9	annexin A9 [Source:MGI Symbol;Acc:MGI:1923711]
ENSMUSG00000015709	4.0926	-4.16448	-2.05813	1.79909	-1.14399	0.252628		3.22531	0	3.73457	9.4105	7	83895486	84059384	-1	11864	protein_coding	Arnt2	aryl hydrocarbon receptor nuclear translocator 2 [Source:MGI Symbol;Acc:MGI:107188]
ENSMUSG00000015711	1664.92	-1.03	-0.0426473	0.122103	-0.349274	0.726884	0.932669	1630.93	1649.04	1558.25	1821.46	3	95160985	95189387	-1	229589	protein_coding	Prune1	prune exopolyphosphatase [Source:MGI Symbol;Acc:MGI:1925152]
ENSMUSG00000015714	8877.66	-1.03362	-0.0477103	0.0929021	-0.513554	0.607564	0.890807	8511.59	8949.12	8600.72	9449.19	3	95222102	95230910	1	76893	protein_coding	Cers2	ceramide synthase 2 [Source:MGI Symbol;Acc:MGI:1924143]
ENSMUSG00000015733	10806.6	-1.04317	-0.0609682	0.0872109	-0.699088	0.484497	0.829334	10240.4	10915.4	10837.7	11233	6	17636233	17666971	1	12343	protein_coding	Capza2	capping protein (actin filament) muscle Z-line, alpha 2 [Source:MGI Symbol;Acc:MGI:106222]
ENSMUSG00000015745	1648.38	1.22218	0.289451	0.120873	2.39466	0.0166357	0.116948	1826.6	1799.21	1375.26	1592.47	3	95895741	95903313	-1	67220	protein_coding	Plekho1	pleckstrin homology domain containing, family O member 1 [Source:MGI Symbol;Acc:MGI:1914470]
ENSMUSG00000015747	1434.29	-1.02891	-0.0411225	0.114675	-0.358602	0.719893	0.930573	1432.04	1395.63	1424.74	1484.77	3	95907144	95965778	-1	22365	protein_coding	Vps45	vacuolar protein sorting 45 [Source:MGI Symbol;Acc:MGI:891965]
ENSMUSG00000015748	3780.44	-1.04909	-0.06914	0.0982798	-0.703502	0.481743	0.82848	3567.19	3812.41	3989.46	3752.7	3	95737436	95763197	-1	70767	protein_coding	Prpf3	pre-mRNA processing factor 3 [Source:MGI Symbol;Acc:MGI:1918017]
ENSMUSG00000015749	8172.31	-1.08522	-0.117985	0.109464	-1.07785	0.281101	0.670566	7705.26	7972.08	9330.83	7681.06	3	95836558	95854702	1	66471	protein_coding	Anp32e	acidic (leucine-rich) nuclear phosphoprotein 32 family, member E [Source:MGI Symbol;Acc:MGI:1913721]
ENSMUSG00000015750	1756.33	-1.11018	-0.150798	0.130207	-1.15814	0.246808	0.631108	1673.94	1654.67	1652.55	2044.17	3	95801281	95805600	1	226548	protein_coding	Aph1a	aph1 homolog A, gamma secretase subunit [Source:MGI Symbol;Acc:MGI:2385110]
ENSMUSG00000015755	6912.17	-1.02378	-0.0339106	0.0861247	-0.393738	0.693774	0.920824	6753.8	6907.76	6949.11	7038.01	10	7781417	7831994	-1	68652	protein_coding	Tab2	TGF-beta activated kinase 1/MAP3K7 binding protein 2 [Source:MGI Symbol;Acc:MGI:1915902]
ENSMUSG00000015757	3837.21	-1.02162	-0.0308622	0.114048	-0.270606	0.786694	0.951507	3663.95	3928.79	4221.94	3534.17	10	7668655	7698899	1	67418	protein_coding	Ppil4	peptidylprolyl isomerase (cyclophilin)-like 4 [Source:MGI Symbol;Acc:MGI:1914668]
ENSMUSG00000015759	2510.68	1.10285	0.141239	0.110704	1.27583	0.202017	0.574387	2715.71	2550.99	2243.55	2532.47	14	47013024	47025868	-1	12793	protein_coding	Cnih1	cornichon family AMPA receptor auxiliary protein 1 [Source:MGI Symbol;Acc:MGI:1277202]
ENSMUSG00000015766	531.631	1.37453	0.45894	0.157761	2.90908	0.00362491	0.0376239	625.71	605.368	450.016	445.431	6	137454243	137631874	-1	13860	protein_coding	Eps8	epidermal growth factor receptor pathway substrate 8 [Source:MGI Symbol;Acc:MGI:104684]
ENSMUSG00000015776	2089.39	-1.04663	-0.0657558	0.10392	-0.632755	0.526894	0.854747	2037.32	2046.05	2103.5	2170.69	2	26795274	26800689	-1	20933	protein_coding	Med22	mediator complex subunit 22 [Source:MGI Symbol;Acc:MGI:98446]
ENSMUSG00000015790	1961.57	1.0516	0.0725855	0.108333	0.670021	0.502845	0.839863	1947.01	2074.21	1872.89	1952.16	2	26803393	26806542	-1	20930	protein_coding	Surf1	surfeit gene 1 [Source:MGI Symbol;Acc:MGI:98443]
ENSMUSG00000015804	2594.53	-1.14197	-0.191524	0.105029	-1.82353	0.0682229	0.306585	2414.68	2429.92	2631.94	2901.57	5	45677571	45686618	1	66999	protein_coding	Med28	mediator complex subunit 28 [Source:MGI Symbol;Acc:MGI:1914249]
ENSMUSG00000015806	1031.95	1.09254	0.127687	0.125802	1.01498	0.310114	0.700988	1097.68	1057.75	999.932	972.419	5	45591363	45607578	-1	110391	protein_coding	Qdpr	quinoid dihydropteridine reductase [Source:MGI Symbol;Acc:MGI:97836]
ENSMUSG00000015812	67.4284	-1.0809	-0.112229	0.395086	-0.284063	0.776362	0.948946	59.1307	70.3916	69.0896	71.1016	14	67982630	67986888	1	14714	protein_coding	Gnrh1	gonadotropin releasing hormone 1 [Source:MGI Symbol;Acc:MGI:95789]
ENSMUSG00000015829	4.26879	-1.47754	-0.563195	1.58303	-0.35577	0.722013		2.15021	4.69277	1.86729	8.36489	1	159351339	159759299	1	21960	protein_coding	Tnr	tenascin R [Source:MGI Symbol;Acc:MGI:99516]
ENSMUSG00000015837	15368.7	-1.2305	-0.299246	0.0906258	-3.30199	0.000960003	0.0127345	13510.8	14049.2	16108.2	17806.8	11	50090193	50101654	-1	18412	protein_coding	Sqstm1	sequestosome 1 [Source:MGI Symbol;Acc:MGI:107931]
ENSMUSG00000015839	6130.28	-1.0843	-0.116765	0.104283	-1.1197	0.262842	0.650772	5552.91	6210.42	6013.6	6744.19	2	75505857	75534985	-1	18024	protein_coding	Nfe2l2	nuclear factor, erythroid derived 2, like 2 [Source:MGI Symbol;Acc:MGI:108420]
ENSMUSG00000015850	245.725	-2.27419	-1.18535	0.262977	-4.50744	6.56158e-06	0.000174565	161.265	138.906	270.757	411.971	3	95583511	95595228	-1	229595	protein_coding	Adamtsl4	ADAMTS-like 4 [Source:MGI Symbol;Acc:MGI:2389008]
ENSMUSG00000015869	3784.9	1.0577	0.0809299	0.107834	0.750503	0.452952	0.809673	3763.94	4017.01	3420.87	3937.77	11	116361671	116385028	-1	67763	protein_coding	Prpsap1	phosphoribosyl pyrophosphate synthetase-associated protein 1 [Source:MGI Symbol;Acc:MGI:1915013]
ENSMUSG00000015879	15.7047	-1.35068	-0.433687	0.81376	-0.532943	0.594073	0.885357	10.751	15.9554	21.4738	14.6386	5	45687047	45796956	-1	58227	protein_coding	Fam184b	family with sequence similarity 184, member B [Source:MGI Symbol;Acc:MGI:2442958]
ENSMUSG00000015880	2669.87	-4.47601	-2.16221	0.10676	-20.253	3.34053e-91	1.99221e-88	967.593	982.667	4556.18	4173.04	5	45827261	45857888	1	54392	protein_coding	Ncapg	non-SMC condensin I complex, subunit G [Source:MGI Symbol;Acc:MGI:1930197]
ENSMUSG00000015882	1686.72	-1.17346	-0.230772	0.108837	-2.12034	0.0339773	0.194371	1539.55	1564.57	1823.41	1819.36	5	45854523	46014957	-1	209707	protein_coding	Lcorl	ligand dependent nuclear receptor corepressor-like [Source:MGI Symbol;Acc:MGI:2651932]
ENSMUSG00000015882	1686.72	-1.17346	-0.230772	0.108837	-2.12034	0.0339773	0.194371	1539.55	1564.57	1823.41	1819.36	5	45854523	46014957	-1	100041576	protein_coding	Lcorl	ligand dependent nuclear receptor corepressor-like [Source:MGI Symbol;Acc:MGI:2651932]
ENSMUSG00000015889	5353.21	1.10049	0.13815	0.0987793	1.39857	0.161941	0.506968	5558.28	5659.48	4792.39	5402.67	10	93289273	93320737	1	16993	protein_coding	Lta4h	leukotriene A4 hydrolase [Source:MGI Symbol;Acc:MGI:96836]
ENSMUSG00000015890	73.7236	1.05441	0.0764373	0.377192	0.202648	0.83941	0.964046	76.3323	75.0844	76.5588	66.9191	10	93359200	93375895	-1	71761	protein_coding	Amdhd1	amidohydrolase domain containing 1 [Source:MGI Symbol;Acc:MGI:1919011]
ENSMUSG00000015932	2247.57	1.05628	0.0789866	0.10397	0.759705	0.447431	0.806134	2275.99	2341.69	2128.71	2243.88	2	143757240	143785244	1	56431	protein_coding	Dstn	destrin [Source:MGI Symbol;Acc:MGI:1929270]
ENSMUSG00000015937	4500.06	1.2162	0.282382	0.101098	2.79316	0.00521964	0.0497064	4941.17	4937.74	4315.3	3806.03	13	56221432	56284174	-1	26914	protein_coding	Macroh2a1	macroH2A.1 histone [Source:MGI Symbol;Acc:MGI:1349392]
ENSMUSG00000015942	1390.42	-1.38334	-0.468156	0.123556	-3.78903	0.000151236	0.00277163	1157.89	1176.01	1717.9	1509.86	5	134212858	134253209	1	114674	protein_coding	Gtf2ird2	GTF2I repeat domain containing 2 [Source:MGI Symbol;Acc:MGI:2149780]
ENSMUSG00000015943	371.69	1.06062	0.0849113	0.186225	0.455962	0.648417	0.907463	393.488	371.668	338.913	382.694	3	96103904	96127025	-1	69168	protein_coding	Bola1	bolA-like 1 (E. coli) [Source:MGI Symbol;Acc:MGI:1916418]
ENSMUSG00000015944	405.842	-1.45895	-0.544932	0.184739	-2.94973	0.00318048	0.0340116	325.756	334.125	440.68	522.806	5	134128550	134173182	1	80909	protein_coding	Castor2	cytosolic arginine sensor for mTORC1 subunit 2 [Source:MGI Symbol;Acc:MGI:1933384]
ENSMUSG00000015947	324.858	-2.09962	-1.07013	0.201296	-5.3162	1.05958e-07	3.79143e-06	202.119	216.806	408.936	471.571	3	96190225	96201285	-1	14129	protein_coding	Fcgr1	Fc receptor, IgG, high affinity I [Source:MGI Symbol;Acc:MGI:95498]
ENSMUSG00000015950	9910.54	-1.24593	-0.317224	0.0905849	-3.50195	0.000461865	0.00686466	9137.3	8513.63	10646.3	11344.9	5	134248907	134258479	-1	17969	protein_coding	Ncf1	neutrophil cytosolic factor 1 [Source:MGI Symbol;Acc:MGI:97283]
ENSMUSG00000015961	5119.87	1.00729	0.0104856	0.100342	0.104498	0.916774	0.983065	4934.72	5342.25	5358.18	4844.32	1	177590528	177624077	-1	11566	protein_coding	Adss	adenylosuccinate synthetase, non muscle [Source:MGI Symbol;Acc:MGI:87948]
ENSMUSG00000015966	26.2233	-1.41732	-0.503162	0.641803	-0.783982	0.43305	0.796756	24.7274	18.7711	37.3457	24.0491	14	29718092	29730853	-1	50905	protein_coding	Il17rb	interleukin 17 receptor B [Source:MGI Symbol;Acc:MGI:1355292]
ENSMUSG00000015971	1585.55	-1.00375	-0.00539462	0.11482	-0.0469835	0.962526	0.99133	1589	1575.83	1519.04	1658.34	14	29700294	29728311	1	56249	protein_coding	Actr8	ARP8 actin-related protein 8 [Source:MGI Symbol;Acc:MGI:1860775]
ENSMUSG00000015994	3286.36	-1.02184	-0.0311707	0.097649	-0.319211	0.749566	0.940442	3147.9	3353.46	3354.58	3289.49	8	26488750	26505678	-1	14272	protein_coding	Fnta	farnesyltransferase, CAAX box, alpha [Source:MGI Symbol;Acc:MGI:104683]
ENSMUSG00000016018	8429.65	-1.09592	-0.132137	0.096787	-1.36524	0.172178	0.525232	7668.71	8418.83	9207.59	8423.45	13	113003952	113063932	-1	72198	protein_coding	Mtrex	Mtr4 exosome RNA helicase [Source:MGI Symbol;Acc:MGI:1919448]
ENSMUSG00000016028	77.7963	1.66039	0.731525	0.43095	1.69747	0.0896078	0.360775	120.412	74.1458	73.7578	42.8701	15	85783130	85918404	-1	12614	protein_coding	Celsr1	cadherin, EGF LAG seven-pass G-type receptor 1 [Source:MGI Symbol;Acc:MGI:1100883]
ENSMUSG00000016087	2623.03	-1.02189	-0.0312363	0.0991068	-0.315179	0.752626	0.942149	2555.52	2633.58	2661.82	2641.21	9	32333500	32454157	-1	14247	protein_coding	Fli1	Friend leukemia integration 1 [Source:MGI Symbol;Acc:MGI:95554]
ENSMUSG00000016128	3.51968	-38.0268	-5.24895	2.22615	-2.35786	0.0183806		0	0	4.66822	9.4105	5	150960975	151157301	-1	243362	protein_coding	Stard13	StAR-related lipid transfer (START) domain containing 13 [Source:MGI Symbol;Acc:MGI:2385331]
ENSMUSG00000016179	61.9164	1.26334	0.337247	0.522893	0.644964	0.518951	0.849986	66.6564	71.3301	27.0757	82.6033	1	193028654	193052606	-1	215303	protein_coding	Camk1g	calcium/calmodulin-dependent protein kinase I gamma [Source:MGI Symbol;Acc:MGI:2388073]
ENSMUSG00000016181	1812.73	1.12646	0.171795	0.112725	1.52401	0.127506	0.442228	1906.16	1935.3	1789.79	1619.65	1	192773412	192812580	-1	215193	protein_coding	Utp25	UTP25 small subunit processome component [Source:MGI Symbol;Acc:MGI:2138080]
ENSMUSG00000016194	28.2409	1.03984	0.0563632	0.637954	0.08835	0.929599	0.986523	33.3282	24.4024	36.4121	18.821	1	192903942	192946383	-1	15483	protein_coding	Hsd11b1	hydroxysteroid 11-beta dehydrogenase 1 [Source:MGI Symbol;Acc:MGI:103562]
ENSMUSG00000016200	3.1915	-2.17883	-1.12356	1.74927	-0.6423	0.520678		2.15021	1.87711	5.60186	3.13683	1	192573541	192718083	-1	329324	protein_coding	Syt14	synaptotagmin XIV [Source:MGI Symbol;Acc:MGI:2444490]
ENSMUSG00000016206	1582.33	1.21596	0.282092	0.121172	2.32804	0.0199099	0.132916	1805.1	1667.81	1344.45	1511.95	17	37581111	37585375	1	14991	protein_coding	H2-M3	histocompatibility 2, M region locus 3 [Source:MGI Symbol;Acc:MGI:95915]
ENSMUSG00000016252	2832.61	-1.11309	-0.154568	0.122126	-1.26564	0.205642	0.578228	2742.59	2620.44	3294.83	2672.58	2	174302865	174305898	-1	67126	protein_coding	Atp5e	ATP synthase, H+ transporting, mitochondrial F1 complex, epsilon subunit [Source:MGI Symbol;Acc:MGI:1855697]
ENSMUSG00000016253	2065.92	-1.00961	-0.0137927	0.107584	-0.128204	0.897988	0.977778	2124.4	1987.86	2028.81	2122.59	2	174257597	174269295	1	57314	protein_coding	Nelfcd	negative elongation factor complex member C/D, Th1l [Source:MGI Symbol;Acc:MGI:1926424]
ENSMUSG00000016255	5.04686	-8.68313	-3.11821	1.71788	-1.81515	0.0695012		2.15021	0	6.5355	11.5017	2	174292488	174299675	1	545486	protein_coding	Tubb1	tubulin, beta 1 class VI [Source:MGI Symbol;Acc:MGI:107814]
ENSMUSG00000016256	8829.7	-1.28549	-0.362315	0.0852302	-4.25102	2.12796e-05	0.000496051	7683.76	7769.35	9737.9	10127.8	2	174269286	174280832	-1	64138	protein_coding	Ctsz	cathepsin Z [Source:MGI Symbol;Acc:MGI:1891190]
ENSMUSG00000016257	3833.36	-1.04816	-0.067853	0.094697	-0.716527	0.473666	0.822964	3637.07	3849.01	3949.31	3898.04	2	174306860	174314874	-1	66390	protein_coding	Prelid3b	PRELI domain containing 3B [Source:MGI Symbol;Acc:MGI:1913640]
ENSMUSG00000016308	2585.1	1.08281	0.114779	0.0989583	1.15987	0.246103	0.630421	2664.11	2711.48	2474.16	2490.65	X	36137553	36147875	1	22209	protein_coding	Ube2a	ubiquitin-conjugating enzyme E2A [Source:MGI Symbol;Acc:MGI:102959]
ENSMUSG00000016319	15940.6	1.12205	0.166133	0.0810649	2.04939	0.0404245	0.218585	16743.7	16970.9	14889.7	15158.2	X	36059304	36062460	1	11740	protein_coding	Slc25a5	solute carrier family 25 (mitochondrial carrier, adenine nucleotide translocator), member 5 [Source:MGI Symbol;Acc:MGI:1353496]
ENSMUSG00000016344	971.155	1.22203	0.289278	0.133438	2.16789	0.0301668	0.179161	1054.68	1081.21	824.407	924.321	2	180829040	180830564	1	66496	protein_coding	Ppdpf	pancreatic progenitor cell differentiation and proliferation factor [Source:MGI Symbol;Acc:MGI:1913746]
ENSMUSG00000016356	678.847	1.04883	0.0687783	0.153313	0.448613	0.653711	0.909022	750.422	640.094	661.953	662.918	2	180628328	180660156	1	73368	protein_coding	Col20a1	collagen, type XX, alpha 1 [Source:MGI Symbol;Acc:MGI:1920618]
ENSMUSG00000016409	1228.84	1.10259	0.140896	0.127303	1.10678	0.268389	0.657558	1330.98	1247.34	1237.08	1099.98	X	36390448	36414399	1	67050	protein_coding	Nkap	NFKB activating protein [Source:MGI Symbol;Acc:MGI:1914300]
ENSMUSG00000016427	940.33	-1.02771	-0.0394291	0.13888	-0.283908	0.776481	0.948946	946.091	909.459	1023.27	882.496	X	36451241	36454816	-1	54405	protein_coding	Ndufa1	NADH:ubiquinone oxidoreductase subunit A1 [Source:MGI Symbol;Acc:MGI:1929511]
ENSMUSG00000016477	887.464	-1.53344	-0.616772	0.136027	-4.53419	5.78242e-06	0.000154988	695.592	705.793	1126.91	1021.56	13	30090558	30170046	-1	13557	protein_coding	E2f3	E2F transcription factor 3 [Source:MGI Symbol;Acc:MGI:1096340]
ENSMUSG00000016481	2335.39	-1.04864	-0.0685194	0.109503	-0.625728	0.531493	0.856768	2168.48	2390.5	2310.77	2471.83	1	194779690	194813894	-1	12946	protein_coding	Cr1l	complement component (3b/4b) receptor 1-like [Source:MGI Symbol;Acc:MGI:88513]
ENSMUSG00000016487	468.709	1.07217	0.100532	0.166776	0.602796	0.546644	0.864352	485.947	484.294	469.623	434.974	6	146789985	146933523	1	67533	protein_coding	Ppfibp1	PTPRF interacting protein, binding protein 1 (liprin beta 1) [Source:MGI Symbol;Acc:MGI:1914783]
ENSMUSG00000016493	21.7934	-1.04435	-0.062609	0.689268	-0.090834	0.927625	0.985996	25.8025	16.894	21.4738	23.0035	1	194719134	194774557	-1	17221	protein_coding	Cd46	CD46 antigen, complement regulatory protein [Source:MGI Symbol;Acc:MGI:1203290]
ENSMUSG00000016495	1703.68	1.0721	0.100445	0.117169	0.857261	0.391301	0.767954	1807.25	1719.43	1738.44	1549.6	19	29325999	29344790	-1	67759	protein_coding	Plgrkt	plasminogen receptor, C-terminal lysine transmembrane protein [Source:MGI Symbol;Acc:MGI:1915009]
ENSMUSG00000016496	710.24	1.1173	0.160011	0.15456	1.03527	0.300544	0.692361	698.817	799.648	628.342	714.153	19	29344855	29365495	1	60533	protein_coding	Cd274	CD274 antigen [Source:MGI Symbol;Acc:MGI:1926446]
ENSMUSG00000016498	97.2254	-1.13258	-0.17961	0.330953	-0.542705	0.587333	0.882571	91.3838	91.0398	109.236	97.2419	19	29388319	29448561	1	58205	protein_coding	Pdcd1lg2	programmed cell death 1 ligand 2 [Source:MGI Symbol;Acc:MGI:1930125]
ENSMUSG00000016503	488.146	-1.04799	-0.0676299	0.166551	-0.406061	0.684698	0.917462	503.148	450.506	493.897	505.03	5	146885467	146892424	1	66596	protein_coding	Gtf3a	general transcription factor III A [Source:MGI Symbol;Acc:MGI:1913846]
ENSMUSG00000016510	666.681	-1.10681	-0.146412	0.155776	-0.939888	0.347275	0.734552	653.663	611.938	645.148	755.977	5	146888383	146900610	-1	76366	protein_coding	Mtif3	mitochondrial translational initiation factor 3 [Source:MGI Symbol;Acc:MGI:1923616]
ENSMUSG00000016520	1135.79	1.15046	0.202206	0.50461	0.400717	0.688629	0.919187	1244.97	1185.39	691.83	1420.99	5	146953465	147013396	-1	140887	protein_coding	Lnx2	ligand of numb-protein X 2 [Source:MGI Symbol;Acc:MGI:2155959]
ENSMUSG00000016526	388.555	1.35648	0.439863	0.189916	2.31609	0.0205535	0.135944	432.191	462.707	361.32	297.999	1	131055192	131066077	-1	226419	protein_coding	Dyrk3	dual-specificity tyrosine-(Y)-phosphorylation regulated kinase 3 [Source:MGI Symbol;Acc:MGI:1330300]
ENSMUSG00000016528	7777.11	-1.14998	-0.201607	0.0979625	-2.058	0.0395904	0.215705	7096.76	7371.41	7791.26	8849.01	1	130981437	131025563	-1	17164	protein_coding	Mapkapk2	MAP kinase-activated protein kinase 2 [Source:MGI Symbol;Acc:MGI:109298]
ENSMUSG00000016529	3.69063	1.39287	0.478063	1.96696	0.243047	0.807969		8.60082	0	0.933644	5.22806	1	130947582	130952711	1	16153	protein_coding	Il10	interleukin 10 [Source:MGI Symbol;Acc:MGI:96537]
ENSMUSG00000016534	5349.72	-1.19864	-0.261396	0.089661	-2.91539	0.00355249	0.0370148	4784.21	4948.06	5748.44	5918.16	X	37490234	37545331	-1	16784	protein_coding	Lamp2	lysosomal-associated membrane protein 2 [Source:MGI Symbol;Acc:MGI:96748]
ENSMUSG00000016541	7993.38	1.08629	0.119408	0.0879141	1.35824	0.174389	0.528596	8278.29	8369.09	7423.4	7902.73	15	85220446	85347413	1	54138	protein_coding	Atxn10	ataxin 10 [Source:MGI Symbol;Acc:MGI:1859293]
ENSMUSG00000016552	533.468	1.16216	0.21681	0.166528	1.30194	0.192935	0.559458	614.959	532.16	473.357	513.395	15	77824722	77840922	-1	239554	protein_coding	Foxred2	FAD-dependent oxidoreductase domain containing 2 [Source:MGI Symbol;Acc:MGI:106315]
ENSMUSG00000016554	6467.5	-1.00302	-0.00434516	0.0897675	-0.0484046	0.961394	0.99133	6387.19	6528.59	6677.42	6276.81	15	77843198	77855013	-1	55944	protein_coding	Eif3d	eukaryotic translation initiation factor 3, subunit D [Source:MGI Symbol;Acc:MGI:1933181]
ENSMUSG00000016559	22374.6	-1.11856	-0.161647	0.0852403	-1.89637	0.0579113	0.275468	20384	21859.9	23199.2	24055.3	11	115912738	115918788	-1	15081	protein_coding	H3f3b	H3.3 histone B [Source:MGI Symbol;Acc:MGI:1101768]
ENSMUSG00000016619	7036.75	-1.04293	-0.0606419	0.0916214	-0.661875	0.508051	0.842911	6835.51	6941.55	6878.15	7491.81	15	84807612	84827164	1	18141	protein_coding	Nup50	nucleoporin 50 [Source:MGI Symbol;Acc:MGI:1351502]
ENSMUSG00000016624	206.842	-1.14612	-0.196754	0.235369	-0.83594	0.403189	0.77618	181.692	203.666	220.34	221.67	15	84669582	84740250	-1	271305	protein_coding	Phf21b	PHD finger protein 21B [Source:MGI Symbol;Acc:MGI:2443812]
ENSMUSG00000016637	655.174	1.05872	0.0823257	0.147622	0.557678	0.577064	0.876116	648.287	699.223	639.546	633.641	15	78043663	78058307	-1	67042	protein_coding	Ift27	intraflagellar transport 27 [Source:MGI Symbol;Acc:MGI:1914292]
ENSMUSG00000016664	3336.98	-1.12527	-0.170276	0.0992067	-1.71638	0.0860925	0.352819	3142.53	3137.59	3387.26	3680.55	15	83259808	83348807	-1	23970	protein_coding	Pacsin2	protein kinase C and casein kinase substrate in neurons 2 [Source:MGI Symbol;Acc:MGI:1345153]
ENSMUSG00000016756	845.521	1.31355	0.393476	0.180349	2.18174	0.0291284	0.175027	974.043	947.002	869.222	591.816	13	24511387	24661360	1	12763	protein_coding	Cmah	cytidine monophospho-N-acetylneuraminic acid hydroxylase [Source:MGI Symbol;Acc:MGI:103227]
ENSMUSG00000016757	4490.91	1.03421	0.0485324	0.0999176	0.485724	0.627163	0.899166	4454.15	4677.76	4180.86	4650.88	15	83459291	83479358	-1	223723	protein_coding	Ttll12	tubulin tyrosine ligase-like family, member 12 [Source:MGI Symbol;Acc:MGI:3039573]
ENSMUSG00000016831	8254.85	1.02987	0.0424652	0.0886315	0.47912	0.631853	0.901037	8198.74	8553.99	8369.18	7897.5	14	52516603	52533858	1	268741	protein_coding	Tox4	TOX high mobility group box family member 4 [Source:MGI Symbol;Acc:MGI:1915389]
ENSMUSG00000016833	706.369	-1.10259	-0.140899	0.177469	-0.793938	0.427232	0.793121	604.208	739.581	836.545	645.142	5	100946493	100952337	1	68735	protein_coding	Mrps18c	mitochondrial ribosomal protein S18C [Source:MGI Symbol;Acc:MGI:1915985]
ENSMUSG00000016921	11124.2	-1.02327	-0.0331926	0.110214	-0.301164	0.763289	0.943843	10504.8	11487.9	12309.2	10194.7	2	162773448	162779041	1	67996	protein_coding	Srsf6	serine and arginine-rich splicing factor 6 [Source:MGI Symbol;Acc:MGI:1915246]
ENSMUSG00000016933	804.153	1.27539	0.350938	0.157358	2.23019	0.0257347	0.159455	958.992	843.761	634.878	778.981	2	160573220	160617680	1	18803	protein_coding	Plcg1	phospholipase C, gamma 1 [Source:MGI Symbol;Acc:MGI:97615]
ENSMUSG00000016940	798.461	1.21223	0.277662	0.139337	1.99274	0.0462902	0.238133	882.66	867.224	689.029	754.932	11	115310954	115322100	1	70382	protein_coding	Kctd2	potassium channel tetramerisation domain containing 2 [Source:MGI Symbol;Acc:MGI:1917632]
ENSMUSG00000016942	27.7531	-2.15122	-1.10516	0.686305	-1.6103	0.107333	0.401846	9.67593	25.341	28.943	47.0525	15	78323867	78352834	-1	71753	protein_coding	Tmprss6	transmembrane serine protease 6 [Source:MGI Symbol;Acc:MGI:1919003]
ENSMUSG00000016946	2702.52	-1.10543	-0.144608	0.103054	-1.40324	0.160546	0.504922	2556.6	2577.27	2715.04	2961.17	17	24266708	24292459	-1	69259	protein_coding	Kctd5	potassium channel tetramerisation domain containing 5 [Source:MGI Symbol;Acc:MGI:1916509]
ENSMUSG00000016984	584.949	-1.21519	-0.281177	0.162983	-1.72519	0.0844938	0.349425	538.627	518.082	696.498	586.588	11	17888756	17903875	-1	68145	protein_coding	Etaa1	Ewing tumor-associated antigen 1 [Source:MGI Symbol;Acc:MGI:1915395]
ENSMUSG00000016995	6.89229	-3.00248	-1.58615	1.24672	-1.27227	0.203279		2.15021	4.69277	10.2701	10.4561	2	164231313	164247080	-1	17183	protein_coding	Matn4	matrilin 4 [Source:MGI Symbol;Acc:MGI:1328314]
ENSMUSG00000017002	3670.84	-1.03881	-0.0549287	0.120117	-0.457292	0.647461	0.907388	3251.11	3949.44	3545.04	3937.77	2	164195990	164231015	-1	20568	protein_coding	Slpi	secretory leukocyte peptidase inhibitor [Source:MGI Symbol;Acc:MGI:109297]
ENSMUSG00000017007	69.9698	1.20396	0.267787	0.468814	0.5712	0.567864	0.87315	70.9568	81.6542	37.3457	89.9226	2	164245061	164257368	1	19668	protein_coding	Rbpjl	recombination signal binding protein for immunoglobulin kappa J region-like [Source:MGI Symbol;Acc:MGI:1196616]
ENSMUSG00000017009	5907.85	-1.18102	-0.240028	0.121168	-1.98095	0.0475968	0.242216	5098.14	5735.51	5706.43	7091.34	2	164266167	164285807	-1	20971	protein_coding	Sdc4	syndecan 4 [Source:MGI Symbol;Acc:MGI:1349164]
ENSMUSG00000017057	76.2308	-1.86771	-0.901271	0.425378	-2.11876	0.0341111	0.19467	52.6801	53.4976	69.0896	129.656	X	35375763	35434912	1	16164	protein_coding	Il13ra1	interleukin 13 receptor, alpha 1 [Source:MGI Symbol;Acc:MGI:105052]
ENSMUSG00000017119	3811.77	-1.12396	-0.168589	0.0981392	-1.71786	0.0858225	0.352375	3599.45	3578.71	3854.08	4214.86	11	101442975	101472777	1	17966	protein_coding	Nbr1	NBR1, autophagy cargo receptor [Source:MGI Symbol;Acc:MGI:108498]
ENSMUSG00000017132	3821.77	1.13154	0.178287	0.106954	1.66696	0.0955229	0.375769	3930.58	4185.01	3830.74	3340.73	11	118022845	118139418	-1	19157	protein_coding	Cyth1	cytohesin 1 [Source:MGI Symbol;Acc:MGI:1334257]
ENSMUSG00000017146	1068.21	-3.15279	-1.65663	0.144214	-11.4873	1.52865e-30	1.90258e-28	539.702	489.925	1763.65	1479.54	11	101379590	101442781	-1	12189	protein_coding	Brca1	breast cancer 1, early onset [Source:MGI Symbol;Acc:MGI:104537]
ENSMUSG00000017167	643.149	1.05839	0.0818765	0.163742	0.500035	0.617051	0.895908	729.995	593.166	602.2	647.234	11	101061349	101081550	1	53321	protein_coding	Cntnap1	contactin associated protein-like 1 [Source:MGI Symbol;Acc:MGI:1858201]
ENSMUSG00000017176	1708.02	1.33021	0.411658	0.112007	3.67529	0.000237579	0.00396324	1958.84	1940.93	1408.87	1523.46	11	100313147	100332634	-1	68106	protein_coding	Nt5c3b	5'-nucleotidase, cytosolic IIIB [Source:MGI Symbol;Acc:MGI:1915356]
ENSMUSG00000017188	1311.7	1.13239	0.179365	0.121436	1.47703	0.139668	0.465225	1438.49	1347.76	1183.86	1276.69	11	101168794	101169940	-1	52469	protein_coding	Coa3	cytochrome C oxidase assembly factor 3 [Source:MGI Symbol;Acc:MGI:1098757]
ENSMUSG00000017195	95.2889	1.06112	0.0855876	0.335249	0.255295	0.798495	0.955734	104.285	91.9783	88.6961	96.1963	11	98441923	98449491	1	69376	protein_coding	Zpbp2	zona pellucida binding protein 2 [Source:MGI Symbol;Acc:MGI:1916626]
ENSMUSG00000017210	3317.63	1.00475	0.00683065	0.0980206	0.0696859	0.944444	0.988099	3256.49	3393.81	3213.6	3406.6	11	98595417	98620261	-1	23989	protein_coding	Med24	mediator complex subunit 24 [Source:MGI Symbol;Acc:MGI:1344385]
ENSMUSG00000017221	8850.12	1.03127	0.0444151	0.0921029	0.482234	0.62964	0.899856	8818	9153.72	8304.76	9124.01	11	98573380	98586805	1	22123	protein_coding	Psmd3	proteasome (prosome, macropain) 26S subunit, non-ATPase, 3 [Source:MGI Symbol;Acc:MGI:98858]
ENSMUSG00000017264	10534.6	-1.06432	-0.0899254	0.0940539	-0.956105	0.339019	0.728547	9833.97	10577.5	10349.4	11377.3	4	148642886	148666858	1	50912	protein_coding	Exosc10	exosome component 10 [Source:MGI Symbol;Acc:MGI:1355322]
ENSMUSG00000017286	2058.91	1.11474	0.156708	0.106124	1.47665	0.13977	0.465457	2194.29	2147.41	2004.53	1889.42	11	76011813	76134551	-1	67201	protein_coding	Glod4	glyoxalase domain containing 4 [Source:MGI Symbol;Acc:MGI:1914451]
ENSMUSG00000017288	3157.97	-1.01363	-0.0195258	0.0985298	-0.198172	0.842911	0.965321	3159.73	3113.19	3072.62	3286.36	11	75937052	76070473	-1	68299	protein_coding	Vps53	VPS53 GARP complex subunit [Source:MGI Symbol;Acc:MGI:1915549]
ENSMUSG00000017291	2383.43	-1.1425	-0.192193	0.121297	-1.58449	0.113083	0.414131	2130.85	2319.17	2764.52	2319.17	11	77419988	77498641	-1	216965	protein_coding	Taok1	TAO kinase 1 [Source:MGI Symbol;Acc:MGI:1914490]
ENSMUSG00000017299	726.114	-1.07367	-0.102557	0.141449	-0.725045	0.468424	0.819327	713.868	687.022	767.455	736.111	2	164587903	164610527	1	76233	protein_coding	Dnttip1	deoxynucleotidyltransferase, terminal, interacting protein 1 [Source:MGI Symbol;Acc:MGI:1923483]
ENSMUSG00000017307	696.71	1.02151	0.0306999	0.145899	0.210418	0.833341	0.962888	703.117	704.854	656.351	722.518	2	164634685	164646802	-1	170789	protein_coding	Acot8	acyl-CoA thioesterase 8 [Source:MGI Symbol;Acc:MGI:2158201]
ENSMUSG00000017309	3.54671	-1.02308	-0.0329189	1.71742	-0.0191676	0.984707		3.22531	3.75422	0.933644	6.27367	11	101932335	101946446	1	52685	protein_coding	Cd300lg	CD300 molecule like family member G [Source:MGI Symbol;Acc:MGI:1289168]
ENSMUSG00000017314	355.448	1.23852	0.308621	0.248628	1.2413	0.214496	0.58933	466.595	320.047	257.686	377.466	11	101947841	101979341	-1	50997	protein_coding	Mpp2	membrane protein, palmitoylated 2 (MAGUK p55 subfamily member 2) [Source:MGI Symbol;Acc:MGI:1858257]
ENSMUSG00000017316	2.68098	4.64869	2.21682	2.12912	1.04119	0.297786		3.22531	5.63133	1.86729	0	11	101990756	101992145	-1	19064	protein_coding	Ppy	pancreatic polypeptide [Source:MGI Symbol;Acc:MGI:97753]
ENSMUSG00000017376	1538.84	1.1117	0.152763	0.112087	1.36289	0.172916	0.526304	1613.73	1626.52	1430.34	1484.77	11	78457994	78588199	-1	18099	protein_coding	Nlk	nemo like kinase [Source:MGI Symbol;Acc:MGI:1201387]
ENSMUSG00000017386	1787.6	1.33918	0.421348	0.108616	3.87923	0.000104788	0.00200513	2034.1	2059.19	1492.9	1564.23	11	78049325	78056415	-1	22032	protein_coding	Traf4	TNF receptor associated factor 4 [Source:MGI Symbol;Acc:MGI:1202880]
ENSMUSG00000017390	14.6509	-2.22858	-1.15613	0.894019	-1.29318	0.195949	0.564423	9.67593	8.44699	11.2037	29.2771	11	78213794	78218607	1	11676	protein_coding	Aldoc	aldolase C, fructose-bisphosphate [Source:MGI Symbol;Acc:MGI:101863]
ENSMUSG00000017400	1270.64	1.77341	0.826528	0.171626	4.81586	1.46564e-06	4.42569e-05	1668.56	1580.53	736.645	1096.85	11	97927449	97944288	-1	217154	protein_coding	Stac2	SH3 and cysteine rich domain 2 [Source:MGI Symbol;Acc:MGI:2144518]
ENSMUSG00000017404	15540.4	1.17981	0.238555	0.110077	2.16717	0.0302222	0.179341	17393	16252.9	15697.3	12818.2	11	97917536	97921318	1	19921	protein_coding	Rpl19	ribosomal protein L19 [Source:MGI Symbol;Acc:MGI:98020]
ENSMUSG00000017405	347.647	1.46156	0.547504	0.190994	2.8666	0.00414905	0.0418206	425.741	399.824	267.022	297.999	11	78056932	78067501	-1	140859	protein_coding	Nek8	NIMA (never in mitosis gene a)-related expressed kinase 8 [Source:MGI Symbol;Acc:MGI:1890646]
ENSMUSG00000017412	2.72099	1.14522	0.195628	1.95253	0.100192	0.920192		1.0751	4.69277	0.933644	4.18245	2	52318332	52566843	-1	12298	protein_coding	Cacnb4	calcium channel, voltage-dependent, beta 4 subunit [Source:MGI Symbol;Acc:MGI:103301]
ENSMUSG00000017417	23.1455	1.91842	0.939917	0.670403	1.40202	0.16091	0.5054	27.9527	32.8494	14.0047	17.7754	11	97814064	97877270	-1	72324	protein_coding	Plxdc1	plexin domain containing 1 [Source:MGI Symbol;Acc:MGI:1919574]
ENSMUSG00000017418	1030.67	-1.13513	-0.182854	0.131389	-1.3917	0.164014	0.510868	999.846	931.046	1044.75	1147.04	2	15054206	15087267	1	75869	protein_coding	Arl5b	ADP-ribosylation factor-like 5B [Source:MGI Symbol;Acc:MGI:1923119]
ENSMUSG00000017421	9165.6	-1.00759	-0.0109043	0.0867354	-0.125719	0.899954	0.978272	8880.35	9380.85	9080.62	9320.58	11	80274105	80296559	1	22680	protein_coding	Zfp207	zinc finger protein 207 [Source:MGI Symbol;Acc:MGI:1340045]
ENSMUSG00000017428	4588.18	1.02492	0.0355134	0.0992861	0.357687	0.720577	0.930573	4419.75	4869.22	4670.09	4393.66	11	80319441	80364074	1	69077	protein_coding	Psmd11	proteasome (prosome, macropain) 26S subunit, non-ATPase, 11 [Source:MGI Symbol;Acc:MGI:1916327]
ENSMUSG00000017446	9.45701	1.52798	0.611622	1.0363	0.5902	0.555056	0.867779	9.67593	13.1398	5.60186	9.4105	11	118319029	118340789	1	56745	protein_coding	C1qtnf1	C1q and tumor necrosis factor related protein 1 [Source:MGI Symbol;Acc:MGI:1919254]
ENSMUSG00000017453	46.9844	1.08521	0.117975	0.471329	0.250302	0.802354	0.956709	45.1543	52.5591	41.0803	49.1437	11	77771441	77784922	-1	19193	protein_coding	Pipox	pipecolic acid oxidase [Source:MGI Symbol;Acc:MGI:1197006]
ENSMUSG00000017478	6396.71	1.00779	0.0111881	0.0951576	0.117574	0.906405	0.97965	6244.2	6598.98	6663.41	6080.23	8	123103348	123144099	1	76014	protein_coding	Zc3h18	zinc finger CCCH-type containing 18 [Source:MGI Symbol;Acc:MGI:1923264]
ENSMUSG00000017485	13376.4	1.17405	0.231494	0.0945449	2.44851	0.0143449	0.105076	13933.3	14961.5	12962.7	11648.1	14	6034301	6104584	-1	21974	protein_coding	Top2b	topoisomerase (DNA) II beta [Source:MGI Symbol;Acc:MGI:98791]
ENSMUSG00000017493	3591.5	2.00571	1.00411	0.111478	9.00733	2.11139e-19	1.92487e-17	5151.89	4435.61	2484.43	2294.07	11	98932070	98945218	1	16010	protein_coding	Igfbp4	insulin-like growth factor binding protein 4 [Source:MGI Symbol;Acc:MGI:96439]
ENSMUSG00000017499	1084.42	-1.18071	-0.239651	0.126278	-1.8978	0.057722	0.274894	986.945	1002.38	1221.21	1127.17	11	98798627	98814766	1	23834	protein_coding	Cdc6	cell division cycle 6 [Source:MGI Symbol;Acc:MGI:1345150]
ENSMUSG00000017548	8095.65	-1.07502	-0.104365	0.0883192	-1.18169	0.237331	0.618164	7728.92	7877.29	8661.41	8114.99	11	79883932	79924949	1	52615	protein_coding	Suz12	SUZ12 polycomb repressive complex 2 subunit [Source:MGI Symbol;Acc:MGI:1261758]
ENSMUSG00000017550	1167.08	-1.6315	-0.706196	0.124816	-5.65788	1.53253e-08	6.28514e-07	906.312	868.163	1503.17	1390.66	11	79980226	80026620	1	237877	protein_coding	Atad5	ATPase family, AAA domain containing 5 [Source:MGI Symbol;Acc:MGI:2442925]
ENSMUSG00000017561	5682.4	1.17181	0.228737	0.0998252	2.29138	0.0219416	0.142233	5858.24	6405.63	5482.35	4983.38	11	79937319	79971817	-1	54394	protein_coding	Crlf3	cytokine receptor-like factor 3 [Source:MGI Symbol;Acc:MGI:1860086]
ENSMUSG00000017607	14.1035	-2.13501	-1.09424	0.851019	-1.2858	0.198512	0.568593	8.60082	9.38555	19.6065	18.821	11	98956504	98980132	-1	217169	protein_coding	Tns4	tensin 4 [Source:MGI Symbol;Acc:MGI:2144377]
ENSMUSG00000017615	2098.75	-1.26078	-0.334313	0.103709	-3.22358	0.001266	0.0160498	1881.43	1832.06	2334.11	2347.4	11	78413676	78427158	-1	21927	protein_coding	Tnfaip1	tumor necrosis factor, alpha-induced protein 1 (endothelial) [Source:MGI Symbol;Acc:MGI:104961]
ENSMUSG00000017631	4258.82	-1.19517	-0.257221	0.12138	-2.11914	0.0340785	0.19461	3898.32	3861.21	4096.83	5178.91	11	76307560	76514384	-1	109934	protein_coding	Abr	active BCR-related gene [Source:MGI Symbol;Acc:MGI:107771]
ENSMUSG00000017639	3.40894	-12.7929	-3.67727	2.15318	-1.70783	0.0876679		0	0.938555	7.46915	5.22806	11	79482038	79588849	1	268451	protein_coding	Rab11fip4	RAB11 family interacting protein 4 (class II) [Source:MGI Symbol;Acc:MGI:2442920]
ENSMUSG00000017652	469.323	-1.44296	-0.529027	0.16578	-3.19114	0.0014171	0.0174253	381.662	386.684	544.314	564.63	2	164897547	164914868	1	21939	protein_coding	Cd40	CD40 antigen [Source:MGI Symbol;Acc:MGI:88336]
ENSMUSG00000017664	2999.42	1.00726	0.0104389	0.105815	0.098652	0.921415	0.984693	3038.24	2981.79	2808.4	3169.25	2	165118474	165129789	-1	228875	protein_coding	Slc35c2	solute carrier family 35, member C2 [Source:MGI Symbol;Acc:MGI:2385166]
ENSMUSG00000017670	1284.95	1.03825	0.0541555	0.120668	0.448796	0.653579	0.909022	1349.25	1268.93	1224.01	1297.6	2	165129951	165168399	-1	140579	protein_coding	Elmo2	engulfment and cell motility 2 [Source:MGI Symbol;Acc:MGI:2153045]
ENSMUSG00000017677	4975.84	-1.24998	-0.321906	0.0994704	-3.2362	0.00121134	0.0154803	4468.13	4377.42	5201.33	5856.47	11	79130198	79145497	-1	78889	protein_coding	Wsb1	WD repeat and SOCS box-containing 1 [Source:MGI Symbol;Acc:MGI:1926139]
ENSMUSG00000017679	3569.01	-1.09364	-0.129142	0.0954279	-1.35329	0.175963	0.531197	3329.59	3488.61	3674.82	3783.02	2	163444234	163460933	1	76080	protein_coding	Ttpal	tocopherol (alpha) transfer protein-like [Source:MGI Symbol;Acc:MGI:1923330]
ENSMUSG00000017686	3006.76	1.0636	0.0889492	0.100441	0.885585	0.375841	0.7549	2978.04	3220.18	2889.63	2939.21	11	80099845	80158733	1	59040	protein_coding	Rhot1	ras homolog family member T1 [Source:MGI Symbol;Acc:MGI:1926078]
ENSMUSG00000017692	11.5051	-1.05881	-0.0824419	0.98509	-0.0836898	0.933303	0.987039	5.37552	16.894	11.2037	12.5473	11	80191738	80246781	1	246104	protein_coding	Rhbdl3	rhomboid like 3 [Source:MGI Symbol;Acc:MGI:2179276]
ENSMUSG00000017697	634.928	1.38417	0.469022	0.15221	3.08141	0.00206023	0.0235527	741.821	733.011	562.987	501.894	2	163568504	163592159	-1	11486	protein_coding	Ada	adenosine deaminase [Source:MGI Symbol;Acc:MGI:87916]
ENSMUSG00000017707	50008.4	1.28433	0.361016	0.0907944	3.9762	7.00263e-05	0.00142168	53973.4	58492.6	45811.1	41756.5	2	163465192	163487051	-1	26943	protein_coding	Serinc3	serine incorporator 3 [Source:MGI Symbol;Acc:MGI:1349457]
ENSMUSG00000017713	152.817	1.38428	0.469137	0.274963	1.70618	0.087974	0.357009	194.594	160.493	130.71	125.473	11	117758778	117764307	-1	71776	protein_coding	Tha1	threonine aldolase 1 [Source:MGI Symbol;Acc:MGI:1919026]
ENSMUSG00000017715	4366.76	-1.12001	-0.163508	0.106101	-1.54106	0.123303	0.432401	4159.57	4078.96	4263.95	4964.56	11	117877118	117914837	1	74451	protein_coding	Pgs1	phosphatidylglycerophosphate synthase 1 [Source:MGI Symbol;Acc:MGI:1921701]
ENSMUSG00000017716	1753.96	-7.7376	-2.95189	0.127699	-23.116	3.19953e-118	4.57949e-115	363.385	438.305	3111.83	3102.33	11	117740077	117746569	1	11799	protein_coding	Birc5	baculoviral IAP repeat-containing 5 [Source:MGI Symbol;Acc:MGI:1203517]
ENSMUSG00000017718	64.9995	-1.04996	-0.0703287	0.418939	-0.167873	0.866683	0.97072	76.3323	50.6819	68.156	64.8279	11	117716750	117730734	1	71562	protein_coding	Afmid	arylformamidase [Source:MGI Symbol;Acc:MGI:2448704]
ENSMUSG00000017720	6.74436	-1.4239	-0.509845	1.20245	-0.424005	0.671562		6.45062	4.69277	7.46915	8.36489	2	164312221	164315644	-1	73603	protein_coding	Trp53tg5	transformation related protein 53 target 5 [Source:MGI Symbol;Acc:MGI:1920853]
ENSMUSG00000017721	2650.2	-1.00535	-0.00769424	0.104365	-0.0737246	0.941229	0.98741	2538.32	2747.15	2585.26	2730.09	2	164339440	164350221	1	78928	protein_coding	Pigt	phosphatidylinositol glycan anchor biosynthesis, class T [Source:MGI Symbol;Acc:MGI:1926178]
ENSMUSG00000017724	710.056	1.3634	0.447208	0.153925	2.90535	0.00366837	0.0379374	822.454	816.542	655.418	545.809	11	101660568	101676197	-1	18612	protein_coding	Etv4	ets variant 4 [Source:MGI Symbol;Acc:MGI:99423]
ENSMUSG00000017734	23.4752	1.86503	0.899195	0.665056	1.35206	0.176356	0.531855	30.1029	30.9723	14.0047	18.821	2	164328026	164335239	1	52840	protein_coding	Dbndd2	dysbindin (dystrobrevin binding protein 1) domain containing 2 [Source:MGI Symbol;Acc:MGI:106562]
ENSMUSG00000017737	2642.16	-1.61966	-0.695693	0.343136	-2.02746	0.0426156	0.226496	2056.67	1977.53	2490.03	4044.43	2	164782700	164797770	1	17395	protein_coding	Mmp9	matrix metallopeptidase 9 [Source:MGI Symbol;Acc:MGI:97011]
ENSMUSG00000017740	216.538	1.0197	0.0281431	0.23115	0.121752	0.903095	0.979126	222.546	214.929	226.875	201.803	2	164802722	164841651	1	57138	protein_coding	Slc12a5	solute carrier family 12, member 5 [Source:MGI Symbol;Acc:MGI:1862037]
ENSMUSG00000017747	836.754	-1.11188	-0.153003	0.14364	-1.06519	0.28679	0.677476	799.877	784.632	814.137	948.37	11	100656858	100661783	-1	80860	protein_coding	Ghdc	GH3 domain containing [Source:MGI Symbol;Acc:MGI:1931556]
ENSMUSG00000017754	269.946	1.43184	0.517869	0.239092	2.16598	0.0303124	0.179653	339.733	296.583	260.487	182.982	2	164681438	164699631	-1	18830	protein_coding	Pltp	phospholipid transfer protein [Source:MGI Symbol;Acc:MGI:103151]
ENSMUSG00000017756	432.65	1.14583	0.196397	0.171745	1.14354	0.252816	0.639207	455.844	468.339	416.405	390.013	13	73881213	73964873	1	20499	protein_coding	Slc12a7	solute carrier family 12, member 7 [Source:MGI Symbol;Acc:MGI:1342283]
ENSMUSG00000017760	4336.25	1.09278	0.127998	0.116864	1.09527	0.273397	0.663018	4694.98	4361.46	3731.77	4556.78	2	164674793	164682952	1	19025	protein_coding	Ctsa	cathepsin A [Source:MGI Symbol;Acc:MGI:97748]
ENSMUSG00000017764	737.346	1.14803	0.199164	0.140399	1.41856	0.156028	0.497019	771.924	804.341	695.564	677.556	2	164664606	164668791	1	71971	protein_coding	Zswim1	zinc finger SWIM-type containing 1 [Source:MGI Symbol;Acc:MGI:1919221]
ENSMUSG00000017765	1241.29	-1.2587	-0.331932	0.132621	-2.50286	0.0123193	0.0936728	1146.06	1052.12	1279.09	1487.91	8	106670222	106692729	-1	20498	protein_coding	Slc12a4	solute carrier family 12, member 4 [Source:MGI Symbol;Acc:MGI:1309465]
ENSMUSG00000017767	4.9327	1.83797	0.878115	1.42459	0.616399	0.537631		4.30041	8.44699	2.80093	4.18245	2	164668309	164670457	-1	75642	protein_coding	Spata25	spermatogenesis associated 25 [Source:MGI Symbol;Acc:MGI:1922892]
ENSMUSG00000017774	10228.7	-1.02114	-0.0301779	0.0908774	-0.332073	0.739834	0.936029	9940.4	10303.5	10807.9	9863.25	11	75541330	75564736	1	17913	protein_coding	Myo1c	myosin IC [Source:MGI Symbol;Acc:MGI:106612]
ENSMUSG00000017776	3917.42	-1.13872	-0.187408	0.0940768	-1.99207	0.0463634	0.238276	3657.5	3668.81	4059.48	4283.87	11	75570085	75597734	1	12928	protein_coding	Crk	v-crk avian sarcoma virus CT10 oncogene homolog [Source:MGI Symbol;Acc:MGI:88508]
ENSMUSG00000017778	709.893	-1.05813	-0.0815131	0.195806	-0.416296	0.677193	0.915439	692.366	687.96	884.16	575.086	13	86192935	86195023	-1	12867	protein_coding	Cox7c	cytochrome c oxidase subunit 7C [Source:MGI Symbol;Acc:MGI:103226]
ENSMUSG00000017781	11336.5	-1.12154	-0.165478	0.0874264	-1.89277	0.0583879	0.276632	10400.5	10972.6	11656.5	12316.3	11	75478923	75519630	1	18738	protein_coding	Pitpna	phosphatidylinositol transfer protein, alpha [Source:MGI Symbol;Acc:MGI:99887]
ENSMUSG00000017801	2133.43	1.00198	0.00284929	0.109043	0.0261299	0.979154	0.994795	2106.13	2164.31	2028.81	2234.47	11	100978103	100983033	1	21428	protein_coding	Mlx	MAX-like protein X [Source:MGI Symbol;Acc:MGI:108398]
ENSMUSG00000017802	3625.05	-1.00945	-0.0135696	0.0996267	-0.136205	0.891659	0.976044	3461.83	3753.28	3545.98	3739.11	11	100987148	101010719	-1	67998	protein_coding	Retreg3	reticulophagy regulator family member 3 [Source:MGI Symbol;Acc:MGI:1915248]
ENSMUSG00000017830	1374.34	1.3077	0.387034	0.145613	2.65797	0.00786135	0.0673281	1692.21	1422.85	1069.02	1313.29	11	100585710	100595097	-1	80861	protein_coding	Dhx58	DEXH (Asp-Glu-X-His) box polypeptide 58 [Source:MGI Symbol;Acc:MGI:1931560]
ENSMUSG00000017831	2821	-1.02007	-0.0286713	0.0992107	-0.288994	0.772586	0.947776	2727.54	2857.9	2807.47	2891.12	17	53786262	53814708	1	271457	protein_coding	Rab5a	RAB5A, member RAS oncogene family [Source:MGI Symbol;Acc:MGI:105926]
ENSMUSG00000017832	22.6821	-1.29949	-0.377949	0.718465	-0.52605	0.598853	0.887123	15.0514	24.4024	34.5448	16.7298	11	100604676	100605401	1	75482	protein_coding	Hspb9	heat shock protein, alpha-crystallin-related, B9 [Source:MGI Symbol;Acc:MGI:1922732]
ENSMUSG00000017837	2148.44	-1.00388	-0.00558715	0.119153	-0.0468904	0.962601	0.99133	2124.4	2163.37	1969.05	2336.94	11	100510070	100518433	1	71966	protein_coding	Nkiras2	NFKB inhibitor interacting Ras-like protein 2 [Source:MGI Symbol;Acc:MGI:1919216]
ENSMUSG00000017843	6006.62	1.04775	0.0672973	0.0894956	0.751962	0.452074	0.80935	5992.62	6300.52	5941.71	5791.64	12	110413554	110549496	1	26931	protein_coding	Ppp2r5c	protein phosphatase 2, regulatory subunit B', gamma [Source:MGI Symbol;Acc:MGI:1349475]
ENSMUSG00000017858	1639.95	1.07148	0.0996025	0.111233	0.895441	0.370552	0.750853	1739.52	1653.73	1565.72	1600.83	2	162859274	162888061	1	245866	protein_coding	Ift52	intraflagellar transport 52 [Source:MGI Symbol;Acc:MGI:2387217]
ENSMUSG00000017861	2377.64	-2.32546	-1.21752	0.10503	-11.592	4.5219e-31	5.77875e-29	1412.69	1447.25	3439.54	3211.07	2	162896607	162926608	1	17865	protein_coding	Mybl2	myeloblastosis oncogene-like 2 [Source:MGI Symbol;Acc:MGI:101785]
ENSMUSG00000017897	159.652	-2.14405	-1.10034	0.275652	-3.99177	6.55828e-05	0.00134098	89.2336	113.565	211.003	224.806	2	165436952	165613647	1	14049	protein_coding	Eya2	EYA transcriptional coactivator and phosphatase 2 [Source:MGI Symbol;Acc:MGI:109341]
ENSMUSG00000017929	2208.9	-1.14377	-0.193799	0.107962	-1.79507	0.0726418	0.318055	2029.79	2091.1	2249.15	2465.55	2	167140364	167191103	-1	56336	protein_coding	B4galt5	UDP-Gal:betaGlcNAc beta 1,4-galactosyltransferase, polypeptide 5 [Source:MGI Symbol;Acc:MGI:1927169]
ENSMUSG00000017943	9.59521	-2.58525	-1.3703	1.23056	-1.11356	0.265469	0.65406	2.15021	8.44699	3.73457	24.0491	2	163280396	163297244	1	228858	protein_coding	Gdap1l1	ganglioside-induced differentiation-associated protein 1-like 1 [Source:MGI Symbol;Acc:MGI:2385163]
ENSMUSG00000017969	6.21567	3.19391	1.67532	1.29802	1.29067	0.196818		8.60082	10.3241	2.80093	3.13683	2	167033725	167082524	-1	19223	protein_coding	Ptgis	prostaglandin I2 (prostacyclin) synthase [Source:MGI Symbol;Acc:MGI:1097156]
ENSMUSG00000017999	9131.78	1.07987	0.110856	0.0927903	1.19469	0.232208	0.612527	9325.44	9639.89	9227.2	8334.57	2	166857113	166876867	1	228889	protein_coding	Ddx27	DEAD box helicase 27 [Source:MGI Symbol;Acc:MGI:2385884]
ENSMUSG00000018001	898.775	-1.14018	-0.18926	0.138873	-1.36283	0.172936	0.526304	806.327	872.856	903.767	1012.15	5	143608202	143696005	1	19159	protein_coding	Cyth3	cytohesin 3 [Source:MGI Symbol;Acc:MGI:1335107]
ENSMUSG00000018008	6753.6	-1.20915	-0.273989	0.0890484	-3.07686	0.00209196	0.0238394	6070.03	6157.86	7171.32	7615.19	15	78481247	78506219	1	72318	protein_coding	Cyth4	cytohesin 4 [Source:MGI Symbol;Acc:MGI:2441702]
ENSMUSG00000018012	195.796	-1.07861	-0.10918	0.247963	-0.440306	0.659715	0.909858	205.345	171.755	214.738	191.347	11	120612296	120614795	1	170758	protein_coding	Rac3	Rac family small GTPase 3 [Source:MGI Symbol;Acc:MGI:2180784]
ENSMUSG00000018040	3370.54	1.07129	0.0993543	0.09546	1.04079	0.297971	0.689214	3502.69	3470.77	3323.77	3184.93	15	82997634	83007002	-1	74778	protein_coding	Rrp7a	ribosomal RNA processing 7 homolog A [Source:MGI Symbol;Acc:MGI:1922028]
ENSMUSG00000018042	1170.02	-1.04646	-0.065518	0.145608	-0.449961	0.652739	0.908974	1199.82	1086.85	1063.42	1330.02	15	83037695	83056793	-1	109754	protein_coding	Cyb5r3	cytochrome b5 reductase 3 [Source:MGI Symbol;Acc:MGI:94893]
ENSMUSG00000018068	4068.36	1.21843	0.285023	0.100887	2.82518	0.00472537	0.0458848	4476.73	4461.89	3881.16	3453.65	11	86101507	86148401	-1	70422	protein_coding	Ints2	integrator complex subunit 2 [Source:MGI Symbol;Acc:MGI:1917672]
ENSMUSG00000018076	4257.16	-1.28306	-0.35959	0.0932406	-3.85658	0.000114985	0.00217121	3703.73	3755.16	4914.7	4655.06	5	118698744	118903503	1	76199	protein_coding	Med13l	mediator complex subunit 13-like [Source:MGI Symbol;Acc:MGI:2670178]
ENSMUSG00000018102	457.936	-1.30067	-0.37926	0.17039	-2.22583	0.0260255	0.160908	377.361	418.595	526.575	509.213	13	23868182	23876891	1	68024	protein_coding	H2bc4	H2B clustered histone 4 [Source:MGI Symbol;Acc:MGI:1915274]
ENSMUSG00000018126	6.71418	1.76477	0.819482	1.2301	0.666194	0.505287		9.67593	7.50844	6.5355	3.13683	15	79142395	79169737	-1	207495	protein_coding	Baiap2l2	BAI1-associated protein 2-like 2 [Source:MGI Symbol;Acc:MGI:2652819]
ENSMUSG00000018143	2175.96	-1.52969	-0.613238	0.105432	-5.81641	6.01246e-09	2.63169e-07	1695.44	1744.77	2554.45	2709.18	5	139777268	139788408	1	17135	protein_coding	Mafk	v-maf musculoaponeurotic fibrosarcoma oncogene family, protein K (avian) [Source:MGI Symbol;Acc:MGI:99951]
ENSMUSG00000018160	4695.29	-1.00121	-0.00175152	0.109535	-0.0159905	0.987242	0.997046	4678.85	4706.85	5112.63	4282.82	11	98042980	98084119	-1	19014	protein_coding	Med1	mediator complex subunit 1 [Source:MGI Symbol;Acc:MGI:1100846]
ENSMUSG00000018166	892.671	1.01847	0.0264011	0.147942	0.178456	0.858365	0.968869	979.419	823.112	932.71	835.444	10	128403392	128425521	-1	13867	protein_coding	Erbb3	erb-b2 receptor tyrosine kinase 3 [Source:MGI Symbol;Acc:MGI:95411]
ENSMUSG00000018167	1825.32	-1.0556	-0.0780571	0.106749	-0.731224	0.464642	0.818109	1776.07	1775.75	1857.95	1891.51	11	98249194	98271938	1	59045	protein_coding	Stard3	START domain containing 3 [Source:MGI Symbol;Acc:MGI:1929618]
ENSMUSG00000018168	2295.19	1.37151	0.455766	0.163166	2.79326	0.00521797	0.0497064	2564.12	2746.21	2322.91	1547.51	11	98355728	98436857	-1	22780	protein_coding	Ikzf3	IKAROS family zinc finger 3 [Source:MGI Symbol;Acc:MGI:1342542]
ENSMUSG00000018169	2528.93	1.14159	0.191039	0.111204	1.71791	0.0858128	0.352375	2640.45	2750.9	2203.4	2520.97	15	78640082	78657675	-1	17305	protein_coding	Mfng	MFNG O-fucosylpeptide 3-beta-N-acetylglucosaminyltransferase [Source:MGI Symbol;Acc:MGI:1095404]
ENSMUSG00000018171	3695.12	-1.07219	-0.100559	0.0953828	-1.05427	0.29176	0.681946	3526.34	3605.93	3717.77	3930.45	11	86474691	86574662	-1	75909	protein_coding	Vmp1	vacuole membrane protein 1 [Source:MGI Symbol;Acc:MGI:1923159]
ENSMUSG00000018189	4700.45	-1.14492	-0.195245	0.0956497	-2.04125	0.0412255	0.221004	4189.68	4575.45	5066.88	4969.79	1	143653010	143683204	1	56207	protein_coding	Uchl5	ubiquitin carboxyl-terminal esterase L5 [Source:MGI Symbol;Acc:MGI:1914848]
ENSMUSG00000018196	1040.48	1.05054	0.0711291	0.130364	0.54562	0.585327	0.8811	1125.63	1007.07	1013.94	1015.29	1	143592076	143625414	1	69367	protein_coding	Glrx2	glutaredoxin 2 (thioltransferase) [Source:MGI Symbol;Acc:MGI:1916617]
ENSMUSG00000018199	861.669	-1.02048	-0.0292518	0.143305	-0.204122	0.838258	0.963734	890.185	815.604	811.336	929.549	1	143626528	143652806	-1	20822	protein_coding	Ro60	Ro60, Y RNA binding protein [Source:MGI Symbol;Acc:MGI:106652]
ENSMUSG00000018209	13576.3	1.01217	0.0174558	0.103722	0.168295	0.866351	0.97072	12799.1	14517.6	14350.1	12638.3	2	163912242	163997444	1	58231	protein_coding	Stk4	serine/threonine kinase 4 [Source:MGI Symbol;Acc:MGI:1929004]
ENSMUSG00000018238	11.8093	1.6039	0.681586	1.04191	0.654171	0.513002	0.846875	6.45062	22.5253	4.66822	13.5929	11	53321850	53328731	1	14566	protein_coding	Gdf9	growth differentiation factor 9 [Source:MGI Symbol;Acc:MGI:95692]
ENSMUSG00000018239	1972.52	1.10952	0.149932	0.112833	1.32879	0.183916	0.545818	1983.57	2166.18	1942.91	1797.41	11	53215506	53224128	1	67966	protein_coding	Zcchc10	zinc finger, CCHC domain containing 10 [Source:MGI Symbol;Acc:MGI:1196228]
ENSMUSG00000018286	5663.34	-1.03897	-0.0551509	0.0956431	-0.576633	0.564188	0.87283	5465.82	5643.53	5488.89	6055.14	11	70416193	70418684	1	19175	protein_coding	Psmb6	proteasome (prosome, macropain) subunit, beta type 6 [Source:MGI Symbol;Acc:MGI:104880]
ENSMUSG00000018287	2464.88	-1.01794	-0.0256541	0.105151	-0.243974	0.807251	0.957067	2354.48	2531.28	2556.32	2417.45	11	70554597	70560242	-1	216873	protein_coding	Spag7	sperm associated antigen 7 [Source:MGI Symbol;Acc:MGI:107380]
ENSMUSG00000018293	30671.3	-1.0478	-0.0673673	0.0802249	-0.83973	0.40106	0.774783	29872.8	30037.5	30780.4	31994.7	11	70542676	70545470	-1	18643	protein_coding	Pfn1	profilin 1 [Source:MGI Symbol;Acc:MGI:97549]
ENSMUSG00000018322	4674.09	1.03449	0.0489204	0.0945686	0.517301	0.604946	0.889429	4594.99	4911.46	4699.03	4490.9	2	163895460	163913089	-1	67145	protein_coding	Tomm34	translocase of outer mitochondrial membrane 34 [Source:MGI Symbol;Acc:MGI:1914395]
ENSMUSG00000018326	9540.94	-1.18631	-0.246485	0.093719	-2.63004	0.00853737	0.0714652	8337.42	9117.12	9984.38	10724.8	2	163836880	163860508	1	54401	protein_coding	Ywhab	tyrosine 3-monooxygenase/tryptophan 5-monooxygenase activation protein, beta polypeptide [Source:MGI Symbol;Acc:MGI:1891917]
ENSMUSG00000018334	635.731	1.07657	0.10644	0.179375	0.59339	0.55292	0.867471	619.259	698.285	523.774	701.605	11	78904266	79037233	-1	16706	protein_coding	Ksr1	kinase suppressor of ras 1 [Source:MGI Symbol;Acc:MGI:105051]
ENSMUSG00000018339	28.5673	1.21506	0.281032	0.602058	0.466786	0.640653	0.905735	35.4784	27.2181	23.3411	28.2315	11	54793279	54801203	1	14778	protein_coding	Gpx3	glutathione peroxidase 3 [Source:MGI Symbol;Acc:MGI:105102]
ENSMUSG00000018340	15160.3	-1.14287	-0.192666	0.0959336	-2.00833	0.0446087	0.232599	14253.7	14044.5	15057.8	17285	11	54869934	54924271	-1	11749	protein_coding	Anxa6	annexin A6 [Source:MGI Symbol;Acc:MGI:88255]
ENSMUSG00000018341	21.8662	-2.19334	-1.13313	0.842396	-1.34513	0.178583	0.536312	17.2016	10.3241	49.4831	10.4561	6	67268302	67353172	-1	16162	protein_coding	Il12rb2	interleukin 12 receptor, beta 2 [Source:MGI Symbol;Acc:MGI:1270861]
ENSMUSG00000018347	1169.36	1.04522	0.0638113	0.148471	0.42979	0.667349	0.912909	1206.27	1183.52	995.264	1292.38	11	65698001	65720065	1	52712	protein_coding	Zkscan6	zinc finger with KRAB and SCAN domains 6 [Source:MGI Symbol;Acc:MGI:1289293]
ENSMUSG00000018362	2363.62	-1.63374	-0.708183	0.121706	-5.8188	5.92717e-09	2.60612e-07	1798.65	1791.7	3214.53	2649.58	11	106879455	106890367	-1	16647	protein_coding	Kpna2	karyopherin (importin) alpha 2 [Source:MGI Symbol;Acc:MGI:103561]
ENSMUSG00000018363	1359.65	-1.03168	-0.044999	0.129868	-0.346497	0.728969	0.933112	1412.69	1264.23	1288.43	1473.27	11	106710892	106811541	-1	66313	protein_coding	Smurf2	SMAD specific E3 ubiquitin protein ligase 2 [Source:MGI Symbol;Acc:MGI:1913563]
ENSMUSG00000018372	868.893	1.14585	0.196419	0.135845	1.44591	0.148202	0.481346	921.363	934.8	847.748	771.661	11	106680078	106710756	1	320162	protein_coding	Cep95	centrosomal protein 95 [Source:MGI Symbol;Acc:MGI:2443502]
ENSMUSG00000018381	397.744	1.29083	0.368302	0.181206	2.03251	0.0421025	0.224353	476.271	420.472	349.183	345.052	11	95720900	95733302	-1	66610	protein_coding	Abi3	ABI family member 3 [Source:MGI Symbol;Acc:MGI:1913860]
ENSMUSG00000018395	914.587	-1.06832	-0.0953462	0.149122	-0.639385	0.522573	0.852031	816.003	952.633	1017.67	872.04	11	53458206	53492794	1	16568	protein_coding	Kif3a	kinesin family member 3A [Source:MGI Symbol;Acc:MGI:107689]
ENSMUSG00000018398	181.431	-2.1444	-1.10058	0.286884	-3.83631	0.000124896	0.00233984	116.111	114.504	196.065	299.045	11	53410084	53440392	1	20362	protein_coding	Septin8	septin 8 [Source:MGI Symbol;Acc:MGI:894310]
ENSMUSG00000018401	1582.11	1.27179	0.346858	0.11272	3.07717	0.00208978	0.0238334	1742.74	1800.15	1429.41	1356.16	11	87482988	87507128	1	170749	protein_coding	Mtmr4	myotubularin related protein 4 [Source:MGI Symbol;Acc:MGI:2180699]
ENSMUSG00000018405	1242.12	1.1315	0.178236	0.128035	1.39209	0.163895	0.510629	1399.78	1237.95	1124.11	1206.64	11	84703887	84710341	-1	217038	protein_coding	Mrm1	mitochondrial rRNA methyltransferase 1 [Source:MGI Symbol;Acc:MGI:2443470]
ENSMUSG00000018411	10.5782	3.8698	1.95226	1.06231	1.83775	0.0660993	0.300711	13.9763	19.7096	6.5355	2.09122	11	104122216	104222916	1	17762	protein_coding	Mapt	microtubule-associated protein tau [Source:MGI Symbol;Acc:MGI:97180]
ENSMUSG00000018412	3050.55	-1.0524	-0.0736868	0.096318	-0.765037	0.44425	0.804707	2928.58	3016.51	3128.64	3128.47	11	104224055	104359687	-1	76719	protein_coding	Kansl1	KAT8 regulatory NSL complex subunit 1 [Source:MGI Symbol;Acc:MGI:1923969]
ENSMUSG00000018415	1481.11	1.12358	0.168099	0.112792	1.49035	0.136133	0.45839	1573.95	1560.82	1412.6	1377.07	11	60307971	60341753	1	66771	protein_coding	Gid4	GID complex subunit 4, VID24 homolog [Source:MGI Symbol;Acc:MGI:1914021]
ENSMUSG00000018425	1559.47	-1.00086	-0.00123555	0.11573	-0.0106762	0.991482	0.998373	1552.45	1565.51	1632.01	1487.91	11	86659672	86698572	-1	67487	protein_coding	Dhx40	DEAH (Asp-Glu-Ala-His) box polypeptide 40 [Source:MGI Symbol;Acc:MGI:1914737]
ENSMUSG00000018427	63.5091	1.21859	0.285214	0.429836	0.663542	0.506984	0.842127	80.6327	59.1289	67.2223	47.0525	11	86827251	86884533	-1	77864	protein_coding	Ypel2	yippee like 2 [Source:MGI Symbol;Acc:MGI:1925114]
ENSMUSG00000018428	3814.07	1.05809	0.0814588	0.0946308	0.860807	0.389345	0.766196	3833.82	4009.51	3770.05	3642.91	11	88721618	88755412	-1	11640	protein_coding	Akap1	A kinase (PRKA) anchor protein 1 [Source:MGI Symbol;Acc:MGI:104729]
ENSMUSG00000018433	5441.78	1.04634	0.0653529	0.100464	0.650514	0.51536	0.848082	5217.48	5911.96	5434.74	5202.96	11	107057489	107080207	-1	68979	protein_coding	Nol11	nucleolar protein 11 [Source:MGI Symbol;Acc:MGI:1916229]
ENSMUSG00000018442	2526.89	-1.08249	-0.114356	0.100021	-1.14331	0.252908	0.639264	2394.25	2459.01	2597.4	2656.9	11	70897990	70910667	-1	116891	protein_coding	Derl2	Der1-like domain family, member 2 [Source:MGI Symbol;Acc:MGI:2151483]
ENSMUSG00000018446	11106	1.07404	0.103052	0.0847155	1.21644	0.223816	0.600803	11472.4	11533	10982.4	10436.2	11	70868662	70873852	-1	12261	protein_coding	C1qbp	complement component 1, q subcomponent binding protein [Source:MGI Symbol;Acc:MGI:1194505]
ENSMUSG00000018449	622.195	1.20622	0.270488	0.179435	1.50744	0.131697	0.450607	667.639	693.592	650.75	476.799	11	70861039	70868659	1	69723	protein_coding	Rpain	RPA interacting protein [Source:MGI Symbol;Acc:MGI:1916973]
ENSMUSG00000018451	15.1543	-1.41543	-0.501237	0.809676	-0.619059	0.535877	0.859091	12.9012	12.2012	17.7392	17.7754	11	70922767	70924339	-1	103712	protein_coding	6330403K07Rik	RIKEN cDNA 6330403K07 gene [Source:MGI Symbol;Acc:MGI:1918001]
ENSMUSG00000018470	77.3133	1.10687	0.14649	0.433878	0.337629	0.735643	0.935207	88.1585	74.1458	47.6158	99.3331	11	69217084	69223868	1	16499	protein_coding	Kcnab3	potassium voltage-gated channel, shaker-related subfamily, beta member 3 [Source:MGI Symbol;Acc:MGI:1336208]
ENSMUSG00000018474	8388.93	1.25903	0.332309	0.0859475	3.86641	0.000110448	0.0020966	9321.14	9380.85	7596.12	7257.59	11	69234099	69260232	-1	216848	protein_coding	Chd3	chromodomain helicase DNA binding protein 3 [Source:MGI Symbol;Acc:MGI:1344395]
ENSMUSG00000018476	2425.56	-1.14713	-0.198028	0.131291	-1.50832	0.131473	0.450183	2320.07	2198.09	2276.22	2907.85	11	69289334	69304501	-1	216850	protein_coding	Kdm6b	KDM1 lysine (K)-specific demethylase 6B [Source:MGI Symbol;Acc:MGI:2448492]
ENSMUSG00000018481	3312.3	-1.08615	-0.11923	0.0971628	-1.22711	0.21978	0.595552	3109.2	3241.77	3528.24	3370.01	11	85078088	85125956	-1	66884	protein_coding	Appbp2	amyloid beta precursor protein (cytoplasmic tail) binding protein 2 [Source:MGI Symbol;Acc:MGI:1914134]
ENSMUSG00000018500	1201.01	-1.36902	-0.453148	0.449657	-1.00776	0.313568	0.704309	1090.15	937.616	966.321	1809.95	11	62139810	62157279	1	11541	protein_coding	Adora2b	adenosine A2b receptor [Source:MGI Symbol;Acc:MGI:99403]
ENSMUSG00000018501	13259.2	1.05241	0.0736904	0.0848945	0.868022	0.385382	0.762244	13443.1	13752.6	13289.5	12551.5	11	62207252	62349367	-1	20185	protein_coding	Ncor1	nuclear receptor co-repressor 1 [Source:MGI Symbol;Acc:MGI:1349717]
ENSMUSG00000018507	13878.1	-1.16446	-0.219658	0.0982879	-2.23484	0.0254278	0.15809	12296	13350	13996.3	15870.3	11	62465312	62491341	1	22368	protein_coding	Trpv2	transient receptor potential cation channel, subfamily V, member 2 [Source:MGI Symbol;Acc:MGI:1341836]
ENSMUSG00000018509	295.013	1.18535	0.24531	0.203027	1.20827	0.226945	0.60563	332.207	307.846	257.686	282.315	11	62415772	62430087	-1	73139	protein_coding	Cenpv	centromere protein V [Source:MGI Symbol;Acc:MGI:1920389]
ENSMUSG00000018537	585.353	1.06724	0.0938788	0.158249	0.593233	0.553025	0.867542	616.034	593.166	603.134	529.079	11	97579649	97591323	-1	22658	protein_coding	Pcgf2	polycomb group ring finger 2 [Source:MGI Symbol;Acc:MGI:99161]
ENSMUSG00000018541	1595.64	-1.07095	-0.098893	0.11613	-0.851575	0.39445	0.770241	1522.35	1559.88	1731.91	1568.42	11	97636307	97657382	-1	67480	protein_coding	Cwc25	CWC25 spliceosome-associated protein [Source:MGI Symbol;Acc:MGI:1914730]
ENSMUSG00000018543	10.8674	-1.67525	-0.744378	0.998145	-0.745761	0.455812	0.811346	9.67593	6.56988	8.40279	18.821	11	97662307	97666744	-1	72215	protein_coding	1700001P01Rik	RIKEN cDNA 1700001P01 gene [Source:MGI Symbol;Acc:MGI:1919465]
ENSMUSG00000018547	2889.59	1.00255	0.00367859	0.101301	0.0363134	0.971032	0.992559	2911.38	2874.79	2769.19	3003	11	97605983	97635530	-1	108083	protein_coding	Pip4k2b	phosphatidylinositol-5-phosphate 4-kinase, type II, beta [Source:MGI Symbol;Acc:MGI:1934234]
ENSMUSG00000018548	1670.97	1.13554	0.183382	0.119056	1.54029	0.123489	0.432574	1713.71	1840.51	1655.35	1474.31	11	87017903	87111509	1	68729	protein_coding	Trim37	tripartite motif-containing 37 [Source:MGI Symbol;Acc:MGI:2153072]
ENSMUSG00000018554	3.24503	-5.18724	-2.37497	1.97738	-1.20107	0.229724		2.15021	0	5.60186	5.22806	11	69826622	69832431	1	53422	protein_coding	Ybx2	Y box protein 2 [Source:MGI Symbol;Acc:MGI:1096372]
ENSMUSG00000018559	3320.97	1.0018	0.00259226	0.112606	0.0230205	0.981634	0.99495	3312.39	3334.68	3031.54	3605.27	11	69871982	69881427	1	67181	protein_coding	Ctdnep1	CTD nuclear envelope phosphatase 1 [Source:MGI Symbol;Acc:MGI:1914431]
ENSMUSG00000018565	2611.93	-1.01326	-0.0190074	0.111676	-0.170201	0.864852	0.970518	2521.12	2667.37	2451.75	2807.47	11	69859048	69873343	-1	54351	protein_coding	Elp5	elongator acetyltransferase complex subunit 5 [Source:MGI Symbol;Acc:MGI:1859017]
ENSMUSG00000018567	7807.41	-1.08865	-0.122537	0.0988666	-1.23942	0.215191	0.589572	7404.24	7546.92	7582.12	8696.35	11	69881969	69885777	1	56486	protein_coding	Gabarap	gamma-aminobutyric acid receptor associated protein [Source:MGI Symbol;Acc:MGI:1861742]
ENSMUSG00000018569	4.77002	1.17218	0.229191	1.45549	0.157466	0.874877		7.52572	2.81566	5.60186	3.13683	11	69855605	69858711	1	53624	protein_coding	Cldn7	claudin 7 [Source:MGI Symbol;Acc:MGI:1859285]
ENSMUSG00000018570	26.4149	-1.07662	-0.106512	0.650932	-0.16363	0.870022	0.972311	32.2531	18.7711	32.6775	21.9578	11	69788178	69791813	-1	70419	protein_coding	2810408A11Rik	RIKEN cDNA 2810408A11 gene [Source:MGI Symbol;Acc:MGI:1917669]
ENSMUSG00000018572	4645.88	-1.06122	-0.0857292	0.0943085	-0.90903	0.363334	0.746273	4390.72	4624.26	4645.81	4922.74	11	69886603	69890835	1	78246	protein_coding	Phf23	PHD finger protein 23 [Source:MGI Symbol;Acc:MGI:1925496]
ENSMUSG00000018574	1244.85	1.04769	0.0672067	0.135855	0.494695	0.620815	0.896826	1284.75	1262.36	1097.03	1335.25	11	69901009	69906237	-1	11370	protein_coding	Acadvl	acyl-Coenzyme A dehydrogenase, very long chain [Source:MGI Symbol;Acc:MGI:895149]
ENSMUSG00000018581	19.4897	1.35493	0.438214	0.764932	0.572879	0.566726	0.87315	29.0278	15.9554	21.4738	11.5017	12	117841717	118162778	-1	13411	protein_coding	Dnah11	dynein, axonemal, heavy chain 11 [Source:MGI Symbol;Acc:MGI:1100864]
ENSMUSG00000018583	13771.5	1.02824	0.0401704	0.0845857	0.474908	0.634853	0.903604	13637.7	14288.6	13837.5	13322.1	11	55360511	55395664	1	27041	protein_coding	G3bp1	GTPase activating protein (SH3 domain) binding protein 1 [Source:MGI Symbol;Acc:MGI:1351465]
ENSMUSG00000018585	1219.32	-1.03684	-0.0521926	0.11936	-0.43727	0.661916	0.911189	1184.76	1209.8	1260.42	1222.32	11	55337467	55352065	-1	11927	protein_coding	Atox1	antioxidant 1 copper chaperone [Source:MGI Symbol;Acc:MGI:1333855]
ENSMUSG00000018593	16.9595	-1.13759	-0.185986	0.980542	-0.189677	0.849562	0.966904	20.427	11.2627	3.73457	32.414	11	55285326	55314009	-1	20692	protein_coding	Sparc	secreted acidic cysteine rich glycoprotein [Source:MGI Symbol;Acc:MGI:98373]
ENSMUSG00000018599	525.611	-1.16945	-0.22583	0.159376	-1.41697	0.156493	0.497656	500.998	468.339	569.523	563.585	11	60619224	60623777	1	237781	protein_coding	Mief2	mitochondrial elongation factor 2 [Source:MGI Symbol;Acc:MGI:2144199]
ENSMUSG00000018648	111.399	-1.03134	-0.0445202	0.326771	-0.136243	0.891629	0.976044	118.261	101.364	129.776	96.1963	11	83938867	83960087	-1	56405	protein_coding	Dusp14	dual specificity phosphatase 14 [Source:MGI Symbol;Acc:MGI:1927168]
ENSMUSG00000018651	1449.32	1.22573	0.29364	0.113112	2.59601	0.0094314	0.0769183	1600.83	1591.79	1298.7	1305.97	11	83969746	84020426	-1	217031	protein_coding	Tada2a	transcriptional adaptor 2A [Source:MGI Symbol;Acc:MGI:2144471]
ENSMUSG00000018654	12416.1	-1.03724	-0.0527514	0.0952508	-0.553815	0.579705	0.877106	11647.7	12730.6	13250.3	12036	11	11635003	11722926	1	22778	protein_coding	Ikzf1	IKAROS family zinc finger 1 [Source:MGI Symbol;Acc:MGI:1342540]
ENSMUSG00000018659	942.125	1.0957	0.131854	0.12912	1.02118	0.30717	0.698871	983.719	986.421	881.36	917.001	11	96828651	96834812	-1	103711	protein_coding	Pnpo	pyridoxine 5'-phosphate oxidase [Source:MGI Symbol;Acc:MGI:2144151]
ENSMUSG00000018661	1846.82	1.06454	0.0902239	0.111	0.81283	0.416316	0.785427	1883.58	1924.98	1712.3	1866.42	11	113539995	113557880	1	16834	protein_coding	Cog1	component of oligomeric golgi complex 1 [Source:MGI Symbol;Acc:MGI:1333873]
ENSMUSG00000018666	3825.88	1.04523	0.0638188	0.102701	0.621404	0.534334	0.85816	3884.35	3937.24	3970.79	3511.16	11	96679953	96699466	1	12412	protein_coding	Cbx1	chromobox 1 [Source:MGI Symbol;Acc:MGI:105369]
ENSMUSG00000018669	2641.16	1.31241	0.392223	0.106433	3.68516	0.000228556	0.00385315	3083.4	2912.33	2174.46	2394.45	11	96798252	96807322	-1	80280	protein_coding	Cdk5rap3	CDK5 regulatory subunit associated protein 3 [Source:MGI Symbol;Acc:MGI:1933126]
ENSMUSG00000018677	4493.91	1.18495	0.244826	0.0955684	2.56179	0.0104133	0.0827575	5023.96	4724.68	3992.26	4234.73	11	102293811	102298772	-1	68066	protein_coding	Slc25a39	solute carrier family 25, member 39 [Source:MGI Symbol;Acc:MGI:1196386]
ENSMUSG00000018678	1263.36	-1.14903	-0.200411	0.123599	-1.62145	0.10492	0.396544	1136.38	1214.49	1293.1	1409.48	11	96844167	96873785	-1	78912	protein_coding	Sp2	Sp2 transcription factor [Source:MGI Symbol;Acc:MGI:1926162]
ENSMUSG00000018697	3277.72	-1.04256	-0.0601294	0.112134	-0.536227	0.591802	0.884382	3060.82	3358.15	3583.32	3108.6	11	84313681	84404348	-1	56321	protein_coding	Aatf	apoptosis antagonizing transcription factor [Source:MGI Symbol;Acc:MGI:1929608]
ENSMUSG00000018707	9775.41	-1.06182	-0.0865388	0.101447	-0.853044	0.393635	0.770241	9556.59	9409.01	10866.7	9269.35	12	110567886	110633379	1	13424	protein_coding	Dync1h1	dynein cytoplasmic 1 heavy chain 1 [Source:MGI Symbol;Acc:MGI:103147]
ENSMUSG00000018727	33.5218	1.11599	0.158322	0.555187	0.28517	0.775514	0.948946	39.7788	30.9723	29.8766	33.4596	11	113588998	113600843	-1	52670	protein_coding	Cpsf4l	cleavage and polyadenylation specific factor 4-like [Source:MGI Symbol;Acc:MGI:1277182]
ENSMUSG00000018733	166.417	1.27868	0.354657	0.261332	1.35711	0.174746	0.529272	191.368	182.08	135.378	156.842	11	83185468	83193412	-1	103737	protein_coding	Pex12	peroxisomal biogenesis factor 12 [Source:MGI Symbol;Acc:MGI:2144177]
ENSMUSG00000018736	3410.93	-1.21851	-0.285112	0.116064	-2.45652	0.0140291	0.103398	2966.21	3182.64	3409.67	4085.2	11	68712260	68762684	-1	83431	protein_coding	Ndel1	nudE neurodevelopment protein 1 like 1 [Source:MGI Symbol;Acc:MGI:1932915]
ENSMUSG00000018740	88.9507	1.66484	0.735387	0.371846	1.97766	0.0479667	0.24294	123.637	98.5482	54.1513	79.4665	11	68858957	68865191	1	71998	protein_coding	Slc25a35	solute carrier family 25, member 35 [Source:MGI Symbol;Acc:MGI:1919248]
ENSMUSG00000018750	1262.87	1.02896	0.0411901	0.146559	0.281048	0.778674	0.949332	1346.03	1215.43	1095.16	1394.85	11	69656738	69674849	1	75580	protein_coding	Zbtb4	zinc finger and BTB domain containing 4 [Source:MGI Symbol;Acc:MGI:1922830]
ENSMUSG00000018761	2039.94	-1.27413	-0.34951	0.115286	-3.03167	0.00243206	0.0271317	1752.42	1834.87	2136.18	2436.27	11	69547523	69553468	-1	24070	protein_coding	Mpdu1	mannose-P-dolichol utilization defect 1 [Source:MGI Symbol;Acc:MGI:1346040]
ENSMUSG00000018765	5629.04	1.01732	0.0247716	0.0908216	0.27275	0.785045	0.951105	5596.99	5757.09	5421.67	5740.41	11	69523816	69544123	1	23879	protein_coding	Fxr2	fragile X mental retardation, autosomal homolog 2 [Source:MGI Symbol;Acc:MGI:1346074]
ENSMUSG00000018770	7733.29	-1.04866	-0.0685426	0.0862022	-0.795138	0.426533	0.792338	7392.41	7706.47	7937.84	7896.46	2	73738791	73741670	-1	228033	protein_coding	Atp5g3	ATP synthase, H+ transporting, mitochondrial F0 complex, subunit C3 (subunit 9) [Source:MGI Symbol;Acc:MGI:2442035]
ENSMUSG00000018774	864.321	-1.88111	-0.911582	0.137783	-6.61606	3.68899e-11	2.08825e-09	568.73	630.709	1112.9	1144.94	11	69555039	69556979	-1	12514	protein_coding	Cd68	CD68 antigen [Source:MGI Symbol;Acc:MGI:88342]
ENSMUSG00000018776	2.5011	2.32559	1.21759	1.97038	0.61795	0.536608		3.22531	3.75422	0.933644	2.09122	11	69650716	69652794	-1	56293	protein_coding	Slc35g3	solute carrier family 35, member G3 [Source:MGI Symbol;Acc:MGI:1927128]
ENSMUSG00000018796	2045.27	-1.21762	-0.284063	0.104582	-2.71619	0.0066039	0.0590547	1813.7	1875.23	2256.62	2235.52	8	46924074	46989088	1	14081	protein_coding	Acsl1	acyl-CoA synthetase long-chain family member 1 [Source:MGI Symbol;Acc:MGI:102797]
ENSMUSG00000018809	597.371	1.08104	0.112416	0.162739	0.690777	0.489706	0.831953	643.987	597.859	622.74	524.897	11	75239259	75296531	1	319822	protein_coding	Smyd4	SET and MYND domain containing 4 [Source:MGI Symbol;Acc:MGI:2442796]
ENSMUSG00000018819	17057.6	-1.17861	-0.237088	0.102129	-2.32147	0.0202617	0.134573	15641.7	15675.7	16855.1	20058	7	142014546	142048604	1	16985	protein_coding	Lsp1	lymphocyte specific 1 [Source:MGI Symbol;Acc:MGI:96832]
ENSMUSG00000018820	1798.6	-1.03233	-0.0459064	0.115934	-0.395971	0.692126	0.919944	1775	1764.48	1713.24	1941.7	19	42152390	42183029	1	319740	protein_coding	Zfyve27	zinc finger, FYVE domain containing 27 [Source:MGI Symbol;Acc:MGI:1919602]
ENSMUSG00000018821	228.817	-1.18954	-0.250407	0.257072	-0.974076	0.330019	0.720644	249.424	168.94	233.411	263.494	19	42111712	42117498	-1	69534	protein_coding	Avpi1	arginine vasopressin-induced 1 [Source:MGI Symbol;Acc:MGI:1916784]
ENSMUSG00000018822	6.53402	-1.18024	-0.239074	1.25732	-0.190147	0.849194		5.37552	6.56988	3.73457	10.4561	19	42186410	42190691	-1	54612	protein_coding	Sfrp5	secreted frizzled-related sequence protein 5 [Source:MGI Symbol;Acc:MGI:1860298]
ENSMUSG00000018830	10.4064	-2.12113	-1.08483	1.0367	-1.04642	0.295366	0.685737	9.67593	3.75422	17.7392	10.4561	16	14012399	14109236	-1	17880	protein_coding	Myh11	myosin, heavy polypeptide 11, smooth muscle [Source:MGI Symbol;Acc:MGI:102643]
ENSMUSG00000018841	595.108	1.24179	0.312418	0.152793	2.04472	0.0408827	0.220314	674.09	644.787	547.115	514.441	11	82767260	82781440	-1	19364	protein_coding	Rad51d	RAD51 paralog D [Source:MGI Symbol;Acc:MGI:1261809]
ENSMUSG00000018844	11.0472	1.08792	0.121575	0.998849	0.121715	0.903125	0.979126	11.8261	11.2627	15.8719	5.22806	11	82782950	82791627	1	78919	protein_coding	Fndc8	fibronectin type III domain containing 8 [Source:MGI Symbol;Acc:MGI:1926169]
ENSMUSG00000018846	4177.04	1.14928	0.200731	0.0989935	2.02772	0.042589	0.22644	4436.95	4496.61	3684.16	4090.43	11	35660311	35682112	1	211347	protein_coding	Pank3	pantothenate kinase 3 [Source:MGI Symbol;Acc:MGI:2387464]
ENSMUSG00000018848	11097.4	1.05854	0.0820717	0.0902863	0.909015	0.363342	0.746273	10890.8	11934.7	10954.4	10609.8	11	35699208	35725333	-1	104458	protein_coding	Rars	arginyl-tRNA synthetase [Source:MGI Symbol;Acc:MGI:1914297]
ENSMUSG00000018849	6.92793	-1.46984	-0.555654	1.22767	-0.45261	0.65083		7.52572	3.75422	11.2037	5.22806	11	35729227	35871354	-1	211652	protein_coding	Wwc1	WW, C2 and coiled-coil domain containing 1 [Source:MGI Symbol;Acc:MGI:2388637]
ENSMUSG00000018858	905.589	-1.01298	-0.0186015	0.141408	-0.131545	0.895344	0.97716	892.336	906.644	838.412	984.966	11	115294578	115303500	1	68572	protein_coding	Mrpl58	mitochondrial ribosomal protein L58 [Source:MGI Symbol;Acc:MGI:1915822]
ENSMUSG00000018861	695.192	1.06743	0.0941391	0.144042	0.653555	0.513398	0.847094	737.521	698.285	660.086	684.876	11	115158850	115167876	-1	14149	protein_coding	Fdxr	ferredoxin reductase [Source:MGI Symbol;Acc:MGI:104724]
ENSMUSG00000018882	5302.75	1.02115	0.0301975	0.101573	0.297298	0.766239	0.944958	5223.93	5491.48	4910.97	5584.61	11	97206542	97220746	1	67036	protein_coding	Mrpl45	mitochondrial ribosomal protein L45 [Source:MGI Symbol;Acc:MGI:1914286]
ENSMUSG00000018899	1968.38	-1.0147	-0.0210558	0.112637	-0.186935	0.851712	0.967039	2015.82	1892.13	1886.89	2078.68	11	53660841	53669200	1	16362	protein_coding	Irf1	interferon regulatory factor 1 [Source:MGI Symbol;Acc:MGI:96590]
ENSMUSG00000018900	342.016	1.16329	0.218211	0.194565	1.12154	0.26206	0.649845	385.962	350.081	336.112	295.908	11	53755368	53782486	-1	20520	protein_coding	Slc22a5	solute carrier family 22 (organic cation transporter), member 5 [Source:MGI Symbol;Acc:MGI:1329012]
ENSMUSG00000018909	1177.34	-2.5979	-1.37734	0.551118	-2.49918	0.012448	0.0944188	706.343	602.552	1062.49	2337.99	7	99184673	99255978	1	109689	protein_coding	Arrb1	arrestin, beta 1 [Source:MGI Symbol;Acc:MGI:99473]
ENSMUSG00000018920	14.6905	-1.23745	-0.307368	0.88434	-0.347568	0.728165	0.932971	6.45062	19.7096	15.8719	16.7298	11	70344809	70350810	-1	66102	protein_coding	Cxcl16	chemokine (C-X-C motif) ligand 16 [Source:MGI Symbol;Acc:MGI:1932682]
ENSMUSG00000018921	4064.54	-1.02754	-0.0391885	0.0949518	-0.412719	0.679812	0.916148	3889.72	4128.7	4191.13	4048.61	11	70283709	70300857	-1	75273	protein_coding	Pelp1	proline, glutamic acid and leucine rich protein 1 [Source:MGI Symbol;Acc:MGI:1922523]
ENSMUSG00000018923	595.722	-1.12917	-0.175265	0.15217	-1.15177	0.249414	0.634883	540.777	578.15	629.276	634.686	11	70342745	70344553	1	66172	protein_coding	Med11	mediator complex subunit 11 [Source:MGI Symbol;Acc:MGI:1913422]
ENSMUSG00000018927	26046.6	-3.12763	-1.64507	0.371873	-4.42373	9.70092e-06	0.000248834	11930.4	13310.6	29525.5	49419.8	11	83478708	83483913	-1	20305	protein_coding	Ccl6	chemokine (C-C motif) ligand 6 [Source:MGI Symbol;Acc:MGI:98263]
ENSMUSG00000018930	151.406	-18.5972	-4.21701	0.384745	-10.9605	5.91465e-28	6.88264e-26	11.8261	18.7711	244.615	330.413	11	83553410	83555509	1	20303	protein_coding	Ccl4	chemokine (C-C motif) ligand 4 [Source:MGI Symbol;Acc:MGI:98261]
ENSMUSG00000018931	684.704	1.08288	0.114879	0.160722	0.714766	0.474753	0.823754	682.69	740.52	590.996	724.609	11	60793072	60805576	-1	24083	protein_coding	Natd1	N-acetyltransferase domain containing 1 [Source:MGI Symbol;Acc:MGI:1344388]
ENSMUSG00000018932	1821.47	-1.11838	-0.161411	0.117236	-1.3768	0.168574	0.517777	1744.89	1694.09	1795.4	2051.49	11	60822859	60843637	1	26397	protein_coding	Map2k3	mitogen-activated protein kinase kinase 3 [Source:MGI Symbol;Acc:MGI:1346868]
ENSMUSG00000018965	8444.66	-1.31223	-0.392016	0.0907037	-4.32195	1.5466e-05	0.00037647	6983.87	7623.88	9497.96	9672.95	5	33176160	33185310	1	22629	protein_coding	Ywhah	tyrosine 3-monooxygenase/tryptophan 5-monooxygenase activation protein, eta polypeptide [Source:MGI Symbol;Acc:MGI:109194]
ENSMUSG00000018974	7185.97	-1.39896	-0.48435	0.0854644	-5.66727	1.45092e-08	5.96755e-07	5995.85	5986.1	8442	8319.93	5	113880507	113910571	-1	53890	protein_coding	Sart3	squamous cell carcinoma antigen recognized by T cells 3 [Source:MGI Symbol;Acc:MGI:1858230]
ENSMUSG00000018983	1371.64	-1.77153	-0.824996	0.116958	-7.05376	1.74151e-12	1.12788e-10	993.395	986.421	1798.2	1708.53	4	135899705	135923368	1	242705	protein_coding	E2f2	E2F transcription factor 2 [Source:MGI Symbol;Acc:MGI:1096341]
ENSMUSG00000018986	246.363	-1.29076	-0.368219	0.22426	-1.64193	0.100605	0.386877	226.847	203.666	298.766	256.175	11	83082156	83105980	1	20557	protein_coding	Slfn3	schlafen 3 [Source:MGI Symbol;Acc:MGI:1329005]
ENSMUSG00000018995	704.722	1.14408	0.194184	0.14862	1.30658	0.191354	0.557017	784.825	719.871	689.963	624.23	7	96600712	96713965	1	244141	protein_coding	Nars2	asparaginyl-tRNA synthetase 2 (mitochondrial)(putative) [Source:MGI Symbol;Acc:MGI:2142075]
ENSMUSG00000018999	932.639	1.07364	0.102509	0.138955	0.737717	0.460687	0.815863	940.715	990.175	835.611	964.054	6	34130315	34154046	-1	58246	protein_coding	Slc35b4	solute carrier family 35, member B4 [Source:MGI Symbol;Acc:MGI:1931249]
ENSMUSG00000019027	75.7777	1.71768	0.780463	0.410058	1.9033	0.0570014	0.273137	113.961	77.9	66.2887	44.9613	14	30982332	31045853	-1	110084	protein_coding	Dnah1	dynein, axonemal, heavy chain 1 [Source:MGI Symbol;Acc:MGI:107721]
ENSMUSG00000019039	654.294	1.24505	0.316206	0.14657	2.15737	0.0309769	0.182221	742.896	708.609	576.992	588.679	9	108447085	108449973	1	67789	protein_coding	Dalrd3	DALR anticodon binding domain containing 3 [Source:MGI Symbol;Acc:MGI:1915039]
ENSMUSG00000019054	2946.57	-1.16948	-0.225865	0.103938	-2.17308	0.0297743	0.177654	2733.99	2698.34	3010.07	3343.87	5	136982129	136995088	1	66437	protein_coding	Fis1	fission, mitochondrial 1 [Source:MGI Symbol;Acc:MGI:1913687]
ENSMUSG00000019055	351.697	1.14364	0.193634	0.210853	0.918333	0.358445	0.742859	394.563	355.712	280.093	376.42	4	147994210	148021224	-1	18822	protein_coding	Plod1	procollagen-lysine, 2-oxoglutarate 5-dioxygenase 1 [Source:MGI Symbol;Acc:MGI:99907]
ENSMUSG00000019066	507.262	1.14988	0.201478	0.178232	1.13042	0.258298	0.645355	585.931	499.311	430.41	513.395	9	21818787	21829488	-1	19340	protein_coding	Rab3d	RAB3D, member RAS oncogene family [Source:MGI Symbol;Acc:MGI:97844]
ENSMUSG00000019080	192.045	1.32468	0.405643	0.252613	1.60578	0.108321	0.403646	215.021	222.437	145.648	185.073	15	76585665	76588439	1	69572	protein_coding	Mfsd3	major facilitator superfamily domain containing 3 [Source:MGI Symbol;Acc:MGI:1916822]
ENSMUSG00000019082	1979.71	1.1227	0.166973	0.107283	1.55638	0.119617	0.425079	2099.68	2088.28	1803.8	1927.06	7	141009657	141017805	-1	68267	protein_coding	Slc25a22	solute carrier family 25 (mitochondrial carrier, glutamate), member 22 [Source:MGI Symbol;Acc:MGI:1915517]
ENSMUSG00000019087	3976.86	-1.04575	-0.0645379	0.105617	-0.611058	0.541161	0.860715	3834.89	3940.05	3777.52	4354.97	X	73340703	73348327	1	54411	protein_coding	Atp6ap1	ATPase, H+ transporting, lysosomal accessory protein 1 [Source:MGI Symbol;Acc:MGI:109629]
ENSMUSG00000019088	722.004	-1.22747	-0.295686	0.14773	-2.00152	0.0453362	0.234757	667.639	628.832	748.782	842.763	X	73316823	73325943	-1	69537	protein_coding	Dnase1l1	deoxyribonuclease 1-like 1 [Source:MGI Symbol;Acc:MGI:109628]
ENSMUSG00000019122	7938.26	-2.66866	-1.41612	0.359469	-3.93947	8.16628e-05	0.00161219	4046.69	4608.3	8766.91	14331.2	11	83463745	83469462	-1	20308	protein_coding	Ccl9	chemokine (C-C motif) ligand 9 [Source:MGI Symbol;Acc:MGI:104533]
ENSMUSG00000019132	6814.39	-1.14048	-0.189641	0.088744	-2.13694	0.0326025	0.188618	6187.22	6546.42	7189.99	7333.92	13	24985640	25000180	1	79555	protein_coding	BC005537	cDNA sequence BC005537 [Source:MGI Symbol;Acc:MGI:2441726]
ENSMUSG00000019139	3333.56	1.23882	0.308972	0.0953948	3.23888	0.00120001	0.0153492	3726.31	3651.92	2927.91	3028.09	8	71047023	71049940	1	71780	protein_coding	Isyna1	myo-inositol 1-phosphate synthase A1 [Source:MGI Symbol;Acc:MGI:1919030]
ENSMUSG00000019143	1769.83	1.04417	0.062354	0.109085	0.571609	0.567587	0.87315	1780.37	1835.81	1769.25	1693.89	18	36916061	36925615	1	70791	protein_coding	Hars2	histidyl-tRNA synthetase 2 [Source:MGI Symbol;Acc:MGI:1918041]
ENSMUSG00000019158	1295.74	-1.17714	-0.235283	0.12356	-1.9042	0.056884	0.272666	1190.14	1190.09	1321.11	1481.63	7	16186704	16189419	1	69094	protein_coding	Tmem160	transmembrane protein 160 [Source:MGI Symbol;Acc:MGI:1916344]
ENSMUSG00000019173	10511.8	-1.02599	-0.03702	0.0948035	-0.390492	0.696172	0.92211	10268.3	10484.6	9997.46	11296.8	11	100605835	100629041	-1	19345	protein_coding	Rab5c	RAB5C, member RAS oncogene family [Source:MGI Symbol;Acc:MGI:105306]
ENSMUSG00000019178	10.1327	-1.28138	-0.3577	0.999496	-0.35788	0.720433	0.930573	6.45062	11.2627	10.2701	12.5473	5	135776074	135807239	-1	76571	protein_coding	Styxl1	serine/threonine/tyrosine interacting-like 1 [Source:MGI Symbol;Acc:MGI:1923821]
ENSMUSG00000019179	12683	-1.26241	-0.33618	0.104962	-3.20288	0.00136063	0.0168758	11291.8	11131.3	12860.9	15447.9	5	135807334	135819252	1	17448	protein_coding	Mdh2	malate dehydrogenase 2, NAD (mitochondrial) [Source:MGI Symbol;Acc:MGI:97050]
ENSMUSG00000019188	5419.11	-1.07136	-0.0994477	0.10357	-0.960201	0.336954	0.727425	5127.17	5336.62	5200.39	6012.27	2	152511381	152550590	1	14950	protein_coding	H13	histocompatibility 13 [Source:MGI Symbol;Acc:MGI:95886]
ENSMUSG00000019189	2806.34	1.19843	0.261147	0.102305	2.55264	0.010691	0.0843553	3054.37	3064.38	2442.41	2664.22	11	44409791	44456347	1	74315	protein_coding	Rnf145	ring finger protein 145 [Source:MGI Symbol;Acc:MGI:1921565]
ENSMUSG00000019194	7.59342	1.18645	0.246656	1.16601	0.211538	0.832468		11.8261	4.69277	6.5355	7.31928	7	30815949	30826428	-1	20266	protein_coding	Scn1b	sodium channel, voltage-gated, type I, beta [Source:MGI Symbol;Acc:MGI:98247]
ENSMUSG00000019210	2852.38	-1.0702	-0.0978756	0.108876	-0.898966	0.368671	0.749912	2660.88	2849.45	2773.85	3125.33	6	120771266	120799754	-1	11973	protein_coding	Atp6v1e1	ATPase, H+ transporting, lysosomal V1 subunit E1 [Source:MGI Symbol;Acc:MGI:894326]
ENSMUSG00000019214	463.765	-2.21923	-1.15006	0.172302	-6.67467	2.47795e-11	1.43591e-09	305.329	271.242	630.209	648.279	17	25937900	25946393	-1	214901	protein_coding	Chtf18	CTF18, chromosome transmission fidelity factor 18 [Source:MGI Symbol;Acc:MGI:2384887]
ENSMUSG00000019230	4.41972	1.68299	0.751023	1.7039	0.440767	0.659382		6.45062	4.69277	6.5355	0	1	138752924	138776315	-1	16876	protein_coding	Lhx9	LIM homeobox protein 9 [Source:MGI Symbol;Acc:MGI:1316721]
ENSMUSG00000019235	296.034	1.04932	0.0694539	0.208894	0.332484	0.739524	0.936029	317.155	289.075	264.221	313.683	12	85182023	85198038	-1	238323	protein_coding	Rps6kl1	ribosomal protein S6 kinase-like 1 [Source:MGI Symbol;Acc:MGI:2443413]
ENSMUSG00000019254	6414.54	1.0324	0.0460007	0.0877515	0.524215	0.600129	0.887826	6499	6534.22	6179.79	6445.15	7	4484519	4504679	-1	232807	protein_coding	Ppp1r12c	protein phosphatase 1, regulatory subunit 12C [Source:MGI Symbol;Acc:MGI:1924258]
ENSMUSG00000019256	2530.3	1.30245	0.381223	0.104295	3.65525	0.000256932	0.00419027	2902.78	2822.23	2106.3	2289.89	12	35547973	35585037	-1	11622	protein_coding	Ahr	aryl-hydrocarbon receptor [Source:MGI Symbol;Acc:MGI:105043]
ENSMUSG00000019261	4083.22	-1.00837	-0.0120282	0.129358	-0.0929836	0.925917	0.985797	4092.92	4038.6	3543.18	4658.2	8	71358576	71370173	1	270058	protein_coding	Map1s	microtubule-associated protein 1S [Source:MGI Symbol;Acc:MGI:2443304]
ENSMUSG00000019295	1067.84	-1.35726	-0.440698	0.140705	-3.13206	0.00173582	0.0204821	902.011	909.459	1111.04	1348.84	5	33810560	33815760	-1	68366	protein_coding	Tmem129	transmembrane protein 129 [Source:MGI Symbol;Acc:MGI:1915616]
ENSMUSG00000019297	3515.93	-1.04507	-0.0635944	0.093373	-0.68108	0.495821	0.835947	3437.1	3439.8	3598.26	3588.54	14	55983150	55992957	1	67842	protein_coding	Nop9	NOP9 nucleolar protein [Source:MGI Symbol;Acc:MGI:1915092]
ENSMUSG00000019301	65.435	1.08652	0.119713	0.416395	0.287499	0.773731	0.947989	75.2572	61.006	52.284	73.1928	11	100969237	100971353	1	15485	protein_coding	Hsd17b1	hydroxysteroid (17-beta) dehydrogenase 1 [Source:MGI Symbol;Acc:MGI:105077]
ENSMUSG00000019302	1754.09	-1.39313	-0.478335	0.121538	-3.93569	8.29563e-05	0.00163098	1496.54	1435.05	1886.89	2197.88	11	100900278	100954545	1	11975	protein_coding	Atp6v0a1	ATPase, H+ transporting, lysosomal V0 subunit A1 [Source:MGI Symbol;Acc:MGI:103286]
ENSMUSG00000019303	165.459	-1.04965	-0.0699104	0.257505	-0.271491	0.786013	0.951392	163.416	159.554	173.658	165.207	11	100982649	100986262	-1	19183	protein_coding	Psmc3ip	proteasome (prosome, macropain) 26S subunit, ATPase 3, interacting protein [Source:MGI Symbol;Acc:MGI:1098610]
ENSMUSG00000019312	955.721	-1.19027	-0.251287	0.127906	-1.96462	0.049458	0.247859	877.284	868.163	1039.15	1038.29	11	98337220	98346199	1	14786	protein_coding	Grb7	growth factor receptor bound protein 7 [Source:MGI Symbol;Acc:MGI:102683]
ENSMUSG00000019320	30.7554	-1.13693	-0.185139	0.579475	-0.319494	0.749352	0.940442	32.2531	25.341	29.8766	35.5508	17	24915208	24919503	1	71893	protein_coding	Noxo1	NADPH oxidase organizer 1 [Source:MGI Symbol;Acc:MGI:1919143]
ENSMUSG00000019326	60.3571	-1.36199	-0.445719	0.430065	-1.0364	0.300015	0.691485	43.0041	59.1289	76.5588	62.7367	11	101221431	101232764	1	11754	protein_coding	Aoc3	amine oxidase, copper containing 3 [Source:MGI Symbol;Acc:MGI:1306797]
ENSMUSG00000019338	863.972	-1.11976	-0.16319	0.132212	-1.23431	0.217088	0.591845	821.379	809.034	916.838	908.636	3	94913901	94922759	-1	78266	protein_coding	Zfp687	zinc finger protein 687 [Source:MGI Symbol;Acc:MGI:1925516]
ENSMUSG00000019362	3479.1	-1.11516	-0.157247	0.0989043	-1.58989	0.11186	0.411477	3216.71	3361.9	3533.84	3803.93	8	84972867	84976348	-1	101966	protein_coding	D8Ertd738e	DNA segment, Chr 8, ERATO Doi 738, expressed [Source:MGI Symbol;Acc:MGI:1289231]
ENSMUSG00000019368	2.90579	1.42723	0.513218	1.84784	0.277739	0.781212		2.15021	4.69277	3.73457	1.04561	11	3981462	3998024	1	103655	protein_coding	Sec14l4	SEC14-like lipid binding 4 [Source:MGI Symbol;Acc:MGI:2144095]
ENSMUSG00000019370	6103.92	-1.00559	-0.00804493	0.0868252	-0.0926566	0.926176	0.985823	6125.94	6048.05	6140.57	6101.14	7	16649304	16658039	-1	12315	protein_coding	Calm3	calmodulin 3 [Source:MGI Symbol;Acc:MGI:103249]
ENSMUSG00000019373	2277.38	1.11444	0.156325	0.10359	1.50907	0.131282	0.450026	2378.13	2423.35	2213.67	2094.36	11	59708621	59730664	-1	26572	protein_coding	Cops3	COP9 signalosome subunit 3 [Source:MGI Symbol;Acc:MGI:1349409]
ENSMUSG00000019428	7052.08	-1.00061	-0.000876459	0.088251	-0.00993143	0.992076	0.998373	7106.43	6993.17	6859.48	7249.22	8	70980374	70987978	1	14232	protein_coding	Fkbp8	FK506 binding protein 8 [Source:MGI Symbol;Acc:MGI:1341070]
ENSMUSG00000019429	2.45959	1.43852	0.524581	2.02712	0.258781	0.795804		1.0751	4.69277	0.933644	3.13683	7	30553755	30555603	-1	233080	protein_coding	Ffar3	free fatty acid receptor 3 [Source:MGI Symbol;Acc:MGI:2685324]
ENSMUSG00000019432	12185.7	1.07185	0.1001	0.0818809	1.2225	0.221517	0.597698	12623.9	12592.6	11700.4	11825.9	17	35460722	35472683	1	53817	protein_coding	Ddx39b	DEAD box helicase 39b [Source:MGI Symbol;Acc:MGI:99240]
ENSMUSG00000019433	2008.45	-1.132	-0.178872	0.110152	-1.62386	0.104407	0.395061	1970.66	1798.27	2172.59	2092.27	8	84379306	84391323	1	67903	protein_coding	Gipc1	GIPC PDZ domain containing family, member 1 [Source:MGI Symbol;Acc:MGI:1926252]
ENSMUSG00000019437	103.293	1.1209	0.16466	0.333873	0.493182	0.621884	0.897552	109.661	108.872	112.037	82.6033	11	78067537	78072735	1	68385	protein_coding	Tlcd1	TLC domain containing 1 [Source:MGI Symbol;Acc:MGI:1915572]
ENSMUSG00000019461	744.64	1.08175	0.113363	0.176295	0.643033	0.520203	0.85035	841.806	705.793	614.337	816.623	11	69737202	69742884	1	70310	protein_coding	Plscr3	phospholipid scramblase 3 [Source:MGI Symbol;Acc:MGI:1917560]
ENSMUSG00000019464	22.9564	1.22827	0.296629	0.669046	0.44336	0.657505	0.909129	21.5021	29.0952	22.4074	18.821	8	84393307	84399382	1	19216	protein_coding	Ptger1	prostaglandin E receptor 1 (subtype EP1) [Source:MGI Symbol;Acc:MGI:97793]
ENSMUSG00000019467	476.979	1.51503	0.599351	0.180285	3.32446	0.000885901	0.0119284	608.508	540.607	342.647	416.153	10	127018394	127025952	-1	52666	protein_coding	Arhgef25	Rho guanine nucleotide exchange factor (GEF) 25 [Source:MGI Symbol;Acc:MGI:1277173]
ENSMUSG00000019470	5986.17	1.13078	0.177316	0.0927746	1.91126	0.0559717	0.270193	6320.53	6385.93	5379.65	5858.56	8	3658421	3671316	-1	67439	protein_coding	Xab2	XPA binding protein 2 [Source:MGI Symbol;Acc:MGI:1914689]
ENSMUSG00000019471	11772.3	1.03424	0.0485676	0.0822093	0.59078	0.554668	0.867646	11883.1	12057.6	11527.7	11620.9	9	21044518	21061278	-1	12539	protein_coding	Cdc37	cell division cycle 37 [Source:MGI Symbol;Acc:MGI:109531]
ENSMUSG00000019478	2.90088	-2.79698	-1.48387	1.96217	-0.756242	0.449504		2.15021	0.938555	7.46915	1.04561	8	124532724	124562026	1	19341	protein_coding	Rab4a	RAB4A, member RAS oncogene family [Source:MGI Symbol;Acc:MGI:105069]
ENSMUSG00000019487	1819.17	-1.05085	-0.0715622	0.110688	-0.646522	0.517941	0.849419	1750.27	1797.33	1792.6	1936.47	17	57556455	57570665	1	106628	protein_coding	Trip10	thyroid hormone receptor interactor 10 [Source:MGI Symbol;Acc:MGI:2146901]
ENSMUSG00000019494	5776.28	-1.11433	-0.156174	0.100207	-1.55851	0.119114	0.423781	5419.59	5507.44	5685.89	6492.2	5	138159333	138162908	1	26893	protein_coding	Cops6	COP9 signalosome subunit 6 [Source:MGI Symbol;Acc:MGI:1349439]
ENSMUSG00000019505	14500.2	1.04277	0.0604143	0.107117	0.564002	0.572753	0.87519	14725.7	14880.8	12801.2	15593.2	11	62441997	62444039	1	22187	protein_coding	Ubb	ubiquitin B [Source:MGI Symbol;Acc:MGI:98888]
ENSMUSG00000019518	530.589	-1.55589	-0.637744	0.161296	-3.95386	7.68991e-05	0.00154154	436.492	394.193	642.347	649.325	5	138170264	138178691	1	11781	protein_coding	Ap4m1	adaptor-related protein complex AP-4, mu 1 [Source:MGI Symbol;Acc:MGI:1337063]
ENSMUSG00000019528	1303.42	1.06567	0.0917541	0.116453	0.787906	0.430752	0.795119	1351.4	1338.38	1266.02	1257.87	3	20176248	20209481	-1	27357	protein_coding	Gyg	glycogenin [Source:MGI Symbol;Acc:MGI:1351614]
ENSMUSG00000019558	39.5012	-1.63623	-0.710372	0.514625	-1.38037	0.167473	0.515827	27.9527	31.9109	44.8149	53.3262	X	72716756	72726108	1	102857	protein_coding	Slc6a8	solute carrier family 6 (neurotransmitter transporter, creatine), member 8 [Source:MGI Symbol;Acc:MGI:2147834]
ENSMUSG00000019564	4147.16	-1.05652	-0.0793156	0.0967776	-0.819566	0.412464	0.783592	4080.02	3986.04	4081.89	4440.71	10	79762877	79790852	1	13496	protein_coding	Arid3a	AT rich interactive domain 3A (BRIGHT-like) [Source:MGI Symbol;Acc:MGI:1328360]
ENSMUSG00000019578	278.653	1.06376	0.0891752	0.20696	0.430881	0.666555	0.912639	288.128	286.259	255.818	284.406	17	56374045	56382028	-1	66530	protein_coding	Ubxn6	UBX domain protein 6 [Source:MGI Symbol;Acc:MGI:1913780]
ENSMUSG00000019579	2525.99	1.07243	0.100881	0.109871	0.918174	0.358528	0.742859	2655.5	2572.58	2282.76	2593.12	17	56482744	56490920	-1	28106	protein_coding	Mydgf	myeloid derived growth factor [Source:MGI Symbol;Acc:MGI:2156020]
ENSMUSG00000019659	1601.17	-1.24077	-0.311235	0.119411	-2.60641	0.00914972	0.0750917	1377.21	1481.04	1868.22	1678.21	9	110485571	110540674	1	72654	protein_coding	Ccdc12	coiled-coil domain containing 12 [Source:MGI Symbol;Acc:MGI:1919904]
ENSMUSG00000019689	504.519	-1.08428	-0.116737	0.160639	-0.726703	0.467408	0.819048	477.346	490.864	531.243	518.623	6	38510437	38516384	1	66117	protein_coding	Fmc1	formation of mitochondrial complex V assembly factor 1 [Source:MGI Symbol;Acc:MGI:1913367]
ENSMUSG00000019699	2301.28	1.09222	0.127266	0.119554	1.06451	0.287098	0.677755	2558.75	2247.84	2339.71	2058.81	1	176847639	177085769	-1	23797	protein_coding	Akt3	thymoma viral proto-oncogene 3 [Source:MGI Symbol;Acc:MGI:1345147]
ENSMUSG00000019710	2004.2	-1.01292	-0.0185133	0.108165	-0.171159	0.864099	0.970424	1947.01	2035.72	2082.96	1951.11	3	87826813	87830979	1	67707	protein_coding	Mrpl24	mitochondrial ribosomal protein L24 [Source:MGI Symbol;Acc:MGI:1914957]
ENSMUSG00000019715	2496.05	-1.71293	-0.776465	0.102784	-7.55436	4.2092e-14	2.9678e-12	1811.55	1868.66	3243.48	3060.5	2	29825438	29850383	1	74412	protein_coding	Gle1	GLE1 RNA export mediator (yeast) [Source:MGI Symbol;Acc:MGI:1921662]
ENSMUSG00000019718	22.8195	2.27914	1.18849	0.695486	1.70886	0.0874772	0.356104	25.8025	37.5422	11.2037	16.7298	12	72120202	72132213	-1	67217	protein_coding	L3hypdh	L-3-hydroxyproline dehydratase (trans-) [Source:MGI Symbol;Acc:MGI:1914467]
ENSMUSG00000019726	1880.58	1.07395	0.102923	0.109356	0.941168	0.346619	0.734552	1986.79	1909.02	1871.96	1754.54	13	13764982	13953388	1	17101	protein_coding	Lyst	lysosomal trafficking regulator [Source:MGI Symbol;Acc:MGI:107448]
ENSMUSG00000019731	2493.83	-1.01217	-0.0174446	0.107597	-0.162129	0.871204	0.972443	2486.71	2470.28	2367.72	2650.63	8	73234485	73246458	-1	270066	protein_coding	Slc35e1	solute carrier family 35, member E1 [Source:MGI Symbol;Acc:MGI:2142403]
ENSMUSG00000019732	122.226	1.01061	0.0152208	0.308939	0.0492677	0.960706	0.99133	115.036	130.459	106.435	136.975	8	73178020	73197714	-1	73316	protein_coding	Calr3	calreticulin 3 [Source:MGI Symbol;Acc:MGI:1920566]
ENSMUSG00000019734	132.043	1.09549	0.131572	0.294138	0.447313	0.654649	0.909129	135.463	140.783	140.047	111.88	7	3668789	3680552	-1	353499	protein_coding	Tmc4	transmembrane channel-like gene family 4 [Source:MGI Symbol;Acc:MGI:2669035]
ENSMUSG00000019737	40.5678	1.29601	0.374072	0.507869	0.736553	0.461394	0.81641	49.4547	42.235	39.213	31.3683	7	30014232	30018471	1	233066	protein_coding	Syne4	spectrin repeat containing, nuclear envelope family member 4 [Source:MGI Symbol;Acc:MGI:2141950]
ENSMUSG00000019738	650.851	1.11663	0.159148	0.146205	1.08853	0.276361	0.665753	674.09	699.223	615.271	614.82	7	29931373	29932815	1	69920	protein_coding	Polr2i	polymerase (RNA) II (DNA directed) polypeptide I [Source:MGI Symbol;Acc:MGI:1917170]
ENSMUSG00000019761	29.114	-1.03844	-0.0544138	0.742935	-0.0732417	0.941614	0.98741	37.6286	19.7096	47.6158	11.5017	11	99276080	99280190	-1	16661	protein_coding	Krt10	keratin 10 [Source:MGI Symbol;Acc:MGI:96685]
ENSMUSG00000019763	826.81	1.27195	0.347043	0.135862	2.55437	0.010638	0.0840763	953.616	898.197	732.91	722.518	10	4351915	4382388	-1	66084	protein_coding	Rmnd1	required for meiotic nuclear division 1 homolog [Source:MGI Symbol;Acc:MGI:1913334]
ENSMUSG00000019767	4.24475	3.29348	1.71961	1.55998	1.10233	0.270319		6.45062	6.56988	1.86729	2.09122	10	4432502	4512231	1	100504234	protein_coding	Ccdc170	coiled-coil domain containing 170 [Source:MGI Symbol;Acc:MGI:2685067]
ENSMUSG00000019768	342.963	-1.00714	-0.0102621	0.192718	-0.0532495	0.957533	0.990759	365.535	318.17	338.913	349.234	10	4561593	4955614	1	13982	protein_coding	Esr1	estrogen receptor 1 (alpha) [Source:MGI Symbol;Acc:MGI:1352467]
ENSMUSG00000019773	620.475	-1.68324	-0.751243	0.157117	-4.78142	1.7406e-06	5.16872e-05	447.243	477.724	828.142	728.791	10	5749160	5755600	-1	67141	protein_coding	Fbxo5	F-box protein 5 [Source:MGI Symbol;Acc:MGI:1914391]
ENSMUSG00000019774	523.142	1.01985	0.0283523	0.161658	0.175385	0.860777	0.969541	553.678	503.065	508.836	526.988	10	5761887	5773910	-1	108853	protein_coding	Mtrf1l	mitochondrial translational release factor 1-like [Source:MGI Symbol;Acc:MGI:1918830]
ENSMUSG00000019777	5589.85	1.07979	0.110745	0.0922194	1.20088	0.229796	0.609539	5726	5882.86	5566.38	5184.14	10	36850540	36877885	1	15182	protein_coding	Hdac2	histone deacetylase 2 [Source:MGI Symbol;Acc:MGI:1097691]
ENSMUSG00000019782	1824.45	1.06824	0.0952359	0.107867	0.882901	0.37729	0.756223	1867.45	1901.51	1727.24	1801.59	10	33872551	33895620	-1	66521	protein_coding	Rwdd1	RWD domain containing 1 [Source:MGI Symbol;Acc:MGI:1913771]
ENSMUSG00000019785	8.78082	-1.90469	-0.929558	1.08162	-0.85941	0.390114		6.45062	5.63133	8.40279	14.6386	10	33388282	33500765	-1	215890	protein_coding	Clvs2	clavesin 2 [Source:MGI Symbol;Acc:MGI:2443223]
ENSMUSG00000019790	1566.92	-1.10006	-0.137579	0.113183	-1.21555	0.224157	0.601492	1494.39	1490.42	1694.56	1588.28	10	9631291	9776823	-1	78808	protein_coding	Stxbp5	syntaxin binding protein 5 (tomosyn) [Source:MGI Symbol;Acc:MGI:1926058]
ENSMUSG00000019791	216.87	1.20781	0.272392	0.232968	1.16923	0.242312	0.625354	248.349	226.192	184.861	208.077	10	30484137	30505628	-1	66847	protein_coding	Hint3	histidine triad nucleotide binding protein 3 [Source:MGI Symbol;Acc:MGI:1914097]
ENSMUSG00000019792	1225.34	1.07882	0.109449	0.139908	0.782292	0.434043	0.797314	1207.34	1336.5	1293.1	1064.43	10	30410221	30476745	-1	73681	protein_coding	Trmt11	tRNA methyltransferase 11 [Source:MGI Symbol;Acc:MGI:1920931]
ENSMUSG00000019794	1319.06	1.0175	0.0250304	0.116552	0.214757	0.829956	0.962298	1317	1344.01	1323.91	1291.33	10	7601764	7638914	1	23924	protein_coding	Katna1	katanin p60 (ATPase-containing) subunit A1 [Source:MGI Symbol;Acc:MGI:1344353]
ENSMUSG00000019795	1350.52	-1.13485	-0.1825	0.121887	-1.49729	0.134317	0.454701	1199.82	1329.93	1403.27	1469.08	10	7505137	7556900	-1	18537	protein_coding	Pcmt1	protein-L-isoaspartate (D-aspartate) O-methyltransferase 1 [Source:MGI Symbol;Acc:MGI:97502]
ENSMUSG00000019796	12.4419	1.08869	0.122599	0.893922	0.137147	0.890914	0.976044	11.8261	14.0783	10.2701	13.5929	10	7465564	7501247	1	237253	protein_coding	Lrp11	low density lipoprotein receptor-related protein 11 [Source:MGI Symbol;Acc:MGI:2442989]
ENSMUSG00000019797	631.781	1.09189	0.126829	0.150689	0.841661	0.399978	0.774051	685.916	633.524	619.006	588.679	10	43401129	43416990	-1	67851	protein_coding	Mtres1	mitochondrial transcription rescue factor 1 [Source:MGI Symbol;Acc:MGI:1915101]
ENSMUSG00000019802	5596.04	-1.04179	-0.0590587	0.0946458	-0.623997	0.53263	0.856951	5372.29	5590.97	5957.58	5463.32	10	42637492	42708510	1	140740	protein_coding	Sec63	SEC63-like (S. cerevisiae) [Source:MGI Symbol;Acc:MGI:2155302]
ENSMUSG00000019804	5718.37	-1.05652	-0.0793184	0.10355	-0.765993	0.443681	0.804256	5615.26	5506.5	5431	6320.72	10	42378026	42411377	1	54198	protein_coding	Snx3	sorting nexin 3 [Source:MGI Symbol;Acc:MGI:1860188]
ENSMUSG00000019808	451.698	1.11453	0.156434	0.167493	0.933974	0.350317	0.737149	469.82	482.417	424.808	429.746	10	13428638	13439120	1	66757	protein_coding	Adat2	adenosine deaminase, tRNA-specific 2 [Source:MGI Symbol;Acc:MGI:1914007]
ENSMUSG00000019809	847.82	1.01783	0.0254974	0.138857	0.183623	0.854309	0.967531	849.331	861.593	888.829	791.528	10	13399586	13428886	-1	56535	protein_coding	Pex3	peroxisomal biogenesis factor 3 [Source:MGI Symbol;Acc:MGI:1929646]
ENSMUSG00000019810	1757.06	1.09596	0.132193	0.119424	1.10692	0.26833	0.657526	1870.68	1803.9	1557.32	1796.36	10	13375284	13394779	1	66848	protein_coding	Fuca2	fucosidase, alpha-L- 2, plasma [Source:MGI Symbol;Acc:MGI:1914098]
ENSMUSG00000019813	518.461	-1.05487	-0.0770709	0.158758	-0.485463	0.627348	0.899166	505.298	504.004	539.646	524.897	10	41594836	41685867	-1	103268	protein_coding	Cep57l1	centrosomal protein 57-like 1 [Source:MGI Symbol;Acc:MGI:1915511]
ENSMUSG00000019814	3700.16	-1.00974	-0.013986	0.106501	-0.131323	0.895519	0.977247	3629.55	3735.45	3981.99	3453.65	10	13053884	13068912	-1	353258	protein_coding	Ltv1	LTV1 ribosome biogenesis factor [Source:MGI Symbol;Acc:MGI:2447810]
ENSMUSG00000019818	17296.5	-1.19269	-0.254215	0.0878304	-2.89438	0.00379907	0.0390073	15553.5	15998.6	17995	19638.7	10	41395410	41407044	1	53599	protein_coding	Cd164	CD164 antigen [Source:MGI Symbol;Acc:MGI:1859568]
ENSMUSG00000019820	1174.58	-1.00394	-0.00567519	0.123394	-0.0459925	0.963316	0.99133	1185.84	1159.11	1223.07	1130.31	10	12257932	12745109	-1	22288	protein_coding	Utrn	utrophin [Source:MGI Symbol;Acc:MGI:104631]
ENSMUSG00000019822	677.805	1.06454	0.0902366	0.161549	0.558572	0.576454	0.875838	654.738	743.335	716.105	597.044	10	41361638	41366365	-1	20598	protein_coding	Smpd2	sphingomyelin phosphodiesterase 2, neutral [Source:MGI Symbol;Acc:MGI:1278330]
ENSMUSG00000019823	4248.34	-1.08096	-0.112316	0.0958126	-1.17224	0.2411	0.623575	4019.81	4145.6	4247.14	4580.82	10	41352310	41363028	1	171580	protein_coding	Mical1	microtubule associated monooxygenase, calponin and LIM domain containing 1 [Source:MGI Symbol;Acc:MGI:2385847]
ENSMUSG00000019826	1605.18	1.0417	0.0589454	0.110563	0.533139	0.593937	0.885349	1659.96	1616.19	1583.46	1561.1	10	41326379	41341570	1	268294	protein_coding	Zbtb24	zinc finger and BTB domain containing 24 [Source:MGI Symbol;Acc:MGI:3039618]
ENSMUSG00000019831	27.7367	-1.7016	-0.766888	0.60674	-1.26395	0.206248	0.57917	20.427	20.6482	36.4121	33.4596	10	40759471	40814566	1	83767	protein_coding	Wasf1	WASP family, member 1 [Source:MGI Symbol;Acc:MGI:1890563]
ENSMUSG00000019832	180.172	1.24237	0.313093	0.252553	1.23971	0.215082	0.589572	204.27	195.219	172.724	148.477	10	10420746	10434009	-1	67844	protein_coding	Rab32	RAB32, member RAS oncogene family [Source:MGI Symbol;Acc:MGI:1915094]
ENSMUSG00000019836	4.02213	1.2762	0.351849	1.56286	0.225132	0.821876		4.30041	4.69277	1.86729	5.22806	4	51253025	51254027	-1		processed_pseudogene	Amd-ps4	S-adenosylmethionine decarboxylase, pseudogene 4 [Source:MGI Symbol;Acc:MGI:3650439]
ENSMUSG00000019837	2439.37	-1.0739	-0.102859	0.109835	-0.936488	0.349022	0.735886	2202.89	2501.25	2529.24	2524.11	10	40123699	40134104	-1	67371	protein_coding	Gtf3c6	general transcription factor IIIC, polypeptide 6, alpha [Source:MGI Symbol;Acc:MGI:1914621]
ENSMUSG00000019841	1661.62	1.13389	0.181285	0.111642	1.62381	0.104417	0.395061	1712.64	1818.92	1577.86	1537.05	10	39608114	39751207	1	19714	protein_coding	Rev3l	REV3 like, DNA directed polymerase zeta catalytic subunit [Source:MGI Symbol;Acc:MGI:1337131]
[truncated: 16,130 more rows]

## Sheet: Fold change >= +-2
EnsemblID	baseMean	FoldChange	log2FoldChange	lfcSE	stat	pvalue	padj	Lig4a-G1	Lig4b-G1	Lig4-Lin37.6_G1	Lig4-Lin37.42_G1	chromosome_name	start_position	end_position	strand	entrezgene_id	gene_biotype	external_gene_name	description
[truncated: 2,156 more rows]

[truncated: 4 more sheets: FC2 p05, FC2 q05, GO ontology analysis, Lig4 G1 vs Lig4-Lin37 G1 DESeq2]
