# Supplementary material for: LIN37-DREAM prevents DNA end resection and homologous recombination at DNA double-strand breaks in quiescent cells
Source: eLife. 2021 Sep 3;10:e68466. doi: 10.7554/eLife.68466 (PMC8416021; doi:10.7554/eLife.68466)
Supplement: Figure 7—source data 2. — GO, gene ontology. [file elife-68466-fig7-data2.xlsx]

## Sheet: G0 and G1
Genes up-regulated in G0 (imatinib-treated) or G1-phase Lig4-/-:Lin37-/- abl pre-B cells
G0	G1
9430015G10Rik															G0=298
Aaas															G1=361 (364-3; Raet1d was counted 4 times)
	Abca1
	Abcb1a
	Abhd10
	Abtb2
	Acod1
	Adam8
	Adamtsl4
	Adgre1
	Adgrf3
	Akr1c13
Alg13
Alg8
Anapc11
Anln	Anln
	Anxa1
Aplf	Aplf
	Apobr
	Apold1
	Aqp9
	Arap3
Arhgap11a
Arhgap19	Arhgap19
	Arhgap22
Arhgef39	Arhgef39
Asf1b	Asf1b
Asns
Aspm	Aspm
Atad2
Atad5
	Atp8b4
Aunip	Aunip
Aurka	Aurka
Aurkb	Aurkb
B3gnt5
Bard1	Bard1
BC030867	BC030867/Hrob
BC052040
Bcat1
	Bcl2a1a
	Bcl2a1b
	Bcl2a1d
	Bcl6
Birc5	Birc5
Blm	Blm
Bora
Brca1	Brca1
Brip1	Brip1
	Btnl9
Bub1	Bub1
Bub1b	Bub1b
	C3
	C3ar1
	C5ar1
	Card9
Casp4
	Casp6
Ccdc14
Ccdc15	Ccdc15
Ccdc18	Ccdc18
Ccdc34
	Ccl24
	Ccl3
	Ccl4
	Ccl6
	Ccl9
Ccna2	Ccna2
Ccnb1	Ccnb1
Ccnb2	Ccnb2
Ccnf
	Ccr2
Ccr7
	Ccsap
	Cd14
	Cd247
	Cd33
	Cd3g
	Cd5
Cd52
	Cd6
	Cd80
	Cdc14b
Cdc20	Cdc20
Cdc25a
Cdc25c	Cdc25c
Cdc45	Cdc45
Cdca2	Cdca2
Cdca3	Cdca3
Cdca5	Cdca5
Cdca8	Cdca8
Cdk1	Cdk1
Cdr2
Cenpa	Cenpa
Cenpe	Cenpe
	Cenpf
Cenph	Cenph
Cenpi	Cenpi
Cenpj
	Cenpk
Cenpl	Cenpl
Cenpn	Cenpn
Cenpo
	Cenpp
	Cenpu
Cenpw	Cenpw
Cep128	Cep128
Cep152
Cep55	Cep55
	Cgas
Chac1
Chaf1a
Chek1
Chek2
Chtf18	Chtf18
Cip2a	Cip2a
Cit	Cit
Ckap2
Ckap2l	Ckap2l
Cks1b	Cks1b
Cks2	Cks2
	Clec4d
	Clec4e
	Clec4n
	Clec5a
Clspn	Clspn
	Col23a1
	Creb5
	Crybg3
	Csf1r
Csrp2
	Csta2
	Csta3
	Cstdc4
Ctc1
	Cxcr2
	Cyp11a1
	Cysltr1
D030056L22Rik
	Dbf4
Dctpp1
Ddias	Ddias
Ddx11
Depdc1a	Depdc1a
Depdc1b	Depdc1b
	Dhrs3
Diaph3	Diaph3
Dlgap5	Dlgap5
	Dock4
	Dok7
Dolpp1
	Dpep2
	Dpep3
	Drp2
Dscc1
Dsn1	Dsn1
Dtl
	Dusp8
Dusp10
	E230025N22Rik
E2f1
E2f2
E2f8
Ect2	Ect2
	Eepd1
Efcab11	Efcab11
	Egr3
	Eif1ad10
	Eif1ad3
	Eif1ad4
	Eif1ad7
	Eif1ad8
	Eme1
	Emp1
Ercc6l	Ercc6l
	Erv3
Esco2	Esco2
Espl1	Espl1
	Evi5
Exo1	Exo1
	Eya2
	F5
Fam122b
Fam167a	Fam167a
	Fam20c
	Fam71f2
Fam72a	Fam72a
Fam83d	Fam83d
Fancb	Fancb
Fancd2	Fancd2
Fancf
Fancg
	Fanci
	Fblim1
	Fbxo48
	Fcer1g
	Fcgr1
	Fcrl6
Fen1
	Fgd4
Fignl1
	Fnip2
	Fosl2
Foxm1	Foxm1
	Gas2l1
	Gcnt1
Gemin6
Gen1	Gen1
Gh
Gins1
Gins3
Gle1
	Gm550
	Gm6525
Gmnn
	Gpr141
Gpt2
Grn
Gtse1	Gtse1
	H2-Aa
	H2-Eb1
H2afx
H2afz
Haspin	Haspin
Haus6
	Hcar2
	Hjurp
	Hjurp
Hmgb1
Hmgb2
Hmgb3
Hmgn2
Hmmr	Hmmr
	Hmx2
	Hmx3
	Id1
	Ifi202b
	Ifi207
	Ifi27
	Ifitm6
Ifrd2
Incenp
	Il1a
	Il1b
	Il1rn
	Incenp
Iqgap3	Iqgap3
	Itgam
	Itgax
	Jam2
	Kbtbd6
Kcnb1
Kif11
Kif14	Kif14
Kif15	Kif15
Kif18a	Kif18a
	Kif18b
Kif20a	Kif20a
Kif20b	Kif20b
Kif22	Kif22
Kif23	Kif23
Kif24	Kif2c
Kif2c
Kif4	Kif4
Kifc1	Kifc1
	Kifc5b
	Klra2
	Klrd1
	Klri2
Knl1	Knl1
Knstrn	Knstrn
Kntc1	Kntc1
Kpna2
Kynu
Lcn10
Lig1
	Lilr4b
Lin37
Lin54
Lin9	Lin9
	Lrp1
Lrr1	Lrr1
	Lrrc49
Lsm2
Lsm3	Lsm3
Mad1l1
Mad2l1	Mad2l1
Map3k20	Map3k20
Mapk12
Mastl	Mastl
Mcam
Mcm10	Mcm10
Mcm3
Mcm4
Mcm5
Mcm7
Mcm8	Mcm8
Mcph1
Melk	Melk
Mis18a	Mis18a
Mis18bp1	Mis18bp1
Mki67	Mki67
	Mmp10
	Mmp12
	Mmp13
	Mmp19
	Mmp8
Mms22l
Mns1	Mns1
	Mpeg1
	Ms4a4a
	Ms4a6d
	Msr1
Mtfr2	Mtfr2
Mthfd2
	Mturn
Mutyh
	Mxd3
Mybl2	Mybl2
Mybpc2
	Myo16
	Myo1a
	Myof
	Naaladl1
	Nbl1
Ncapd2
Ncapd3
Ncapg	Ncapg
Ncapg2	Ncapg2
Ncaph	Ncaph
Ndc1	Ndc1
Ndc80	Ndc80
Nek2
	Nek6
	Nemp1
	Nemp1
	Neo1
	Nes
Nfatc2ip
Nr4a1
Nr4a2
Nrgn
	Nrxn3
Nsl1	Nsl1
Nudcd2
Nuf2	Nuf2
Nusap1	Nusap1
	Oas2
Oip5	Oip5
	Olfm1
	Olfml2b
	Olfr1258
	Osbp2
	P2ry6
Palb2
Parpbp	Parpbp
Pbk	Pbk
Pde4c
Pex19
Pif1	Pif1
	Pilra
	Pilrb1
	Pilrb2
Pimreg	Pimreg
Pkmyt1	Pkmyt1
Plk1	Plk1
Plk4	Plk4
	Plxdc2
Pmf1
Poc1a	Poc1a
Pold1
Pole
Polq	Polq
Polr3g
Ppih
Prc1	Prc1
Prim2
Prr11	Prr11
Psat1
Psrc1	Prr5l
	Prune2
	Psrc1
	Pstpip2
	Ptpn5
Pttg1
Rab3b
	Rab7b
Racgap1
Rad18	Rad18
Rad51	Rad51
Rad51ap1	Rad51ap1
Rad51b	Rad51b
Rad54b
	Rad54l
	Raet1d
	Raet1e
Rangap1
	Rbm47
Rbl1
Rcc1
Rdm1
Recql4	Recql4
Rfwd3
Rmi2
Rnf141
	Rnf223
	Robo2
Rpa2
Rpp30
Rrm1
Rrm2
Rtel1
	Rttn
	S100a11
Sac3d1
Sapcd2	Sapcd2
Sass6	Sass6
	Scimp
	Sectm1a
	Sell
	Septin8
Serpinb1a
	Serpinb2
	Serpinb8
	Serpinb9g
Sgo1	Sgo1
Sgo2a	Sgo2a
Shcbp1	Shcbp1
Siah1b
	Shisa3
	Siah1b
	Sirpa
Ska1	Ska1
Ska3	Ska3
Slc1a4
Slc25a10
Slc6a9
Slc7a1
	Slco4c1
	Slfn1
Smc2	Smc2
Smc4	Smc4
	Smox
Snrnp25
Spag5	Spag5
Spc24	Spc24
Spc25	Spc25
Spdl1	Spdl1
Spib
Spp1	Spp1
	Ssc4d
	St18
	Stfa1
	Stfa2
Stil	Stil
Stmn1
	Sult1d1
Suv39h1	Suv39h1
	Syt1
	Sytl2
Tacc3	Tacc3
	Tanc2
Tbc1d31
Tcf19
Tdp1
Tedc1	Tedc1
	Tent5c
	Tex14
	Tex52
	Thbs1
Thy1
Ticrr	Ticrr
Timeless
	Tlr13
Tjp2
Tlr9
Tmco4
	Tmem132a
	Tmem171
Tmpo
	Tnfsf14
	Tnip3
Top2a	Top2a
Topbp1
Tpx2	Tpx2
	Traf1
Traip	Traip
	Trim16
Trip13	Trip13
Troap	Troap
	Tspan8
Ttf2
Ttk	Ttk
Tube1
Ube2c	Ube2c
Ube2t
Ung
Wdr62	Wdr62
	Wfdc17
Xkr5	Xkr5
Xrcc2
	Zfand2a
Zfp101	Zfp101
	Zfp473
Zranb3
Zwilch	Zwilch

## Sheet: G0 unique
G0 unique
9430015G10Rik
Aaas
Alg13
Alg8		GO analysis
Anapc11		Analysis Type:	PANTHER Overrepresentation Test (Released 20210224)
Arhgap11a		Annotation Version and Release Date:	GO Ontology database DOI: 10.5281/zenodo.4735677 Released 2021-05-01
Asns		Analyzed List:	upload_1 (Mus musculus)
Atad2		Reference List:	Mus musculus (all genes in database)
Atad5		Test Type:	FISHER
B3gnt5		Correction:	BONFERRONI
BC052040		Bonferroni count:	9060
Bcat1		GO biological process complete	Mus musculus - REFLIST (21988)	upload_1 (144)	upload_1 (expected)	upload_1 (over/under)	upload_1 (fold Enrichment)	upload_1 (P-value)
Bora		cell cycle (GO:0007049)	1191	55	7.8	+	7.05	1.13e-27
Casp4		cell cycle process (GO:0022402)	759	44	4.97	+	8.85	8.8e-25
Ccdc14		DNA replication (GO:0006260)	174	26	1.14	+	22.82	1.44e-22
Ccdc34		DNA metabolic process (GO:0006259)	636	39	4.17	+	9.36	2.97e-22
Ccnf		mitotic cell cycle (GO:0000278)	546	35	3.58	+	9.79	4.01e-20
Ccr7		DNA repair (GO:0006281)	443	32	2.9	+	11.03	1.55e-19
Cd52		mitotic cell cycle process (GO:1903047)	478	32	3.13	+	10.22	1.36e-18
Cdc25a		cellular response to DNA damage stimulus (GO:0006974)	674	35	4.41	+	7.93	2.75e-17
Cdr2		DNA-dependent DNA replication (GO:0006261)	113	18	0.74	+	24.32	4.23e-15
Cenpj		nucleic acid metabolic process (GO:0090304)	1754	48	11.49	+	4.18	4.97e-14
Cenpo		heterocycle metabolic process (GO:0046483)	2296	53	15.04	+	3.52	6.7e-13
Cep152		regulation of cell cycle (GO:0051726)	965	35	6.32	+	5.54	1.41e-12
Chac1		nucleobase-containing compound metabolic process (GO:0006139)	2174	51	14.24	+	3.58	1.73e-12
Chaf1a		cellular aromatic compound metabolic process (GO:0006725)	2378	53	15.57	+	3.4	2.91e-12
Chek1		cellular response to stress (GO:0033554)	1445	41	9.46	+	4.33	8.14e-12
Chek2		regulation of cell cycle process (GO:0010564)	623	28	4.08	+	6.86	1.47e-11
Ckap2		organic cyclic compound metabolic process (GO:1901360)	2598	53	17.01	+	3.12	1.11e-10
Csrp2		cellular macromolecule metabolic process (GO:0044260)	3960	66	25.93	+	2.54	1.93e-10
Ctc1		DNA recombination (GO:0006310)	209	17	1.37	+	12.42	1.16e-09
D030056L22Rik		cellular macromolecule biosynthetic process (GO:0034645)	1154	34	7.56	+	4.5	1.45e-09
Dctpp1		macromolecule biosynthetic process (GO:0009059)	1166	34	7.64	+	4.45	1.93e-09
Ddx11		nuclear DNA replication (GO:0033260)	24	9	0.16	+	57.26	4.97e-09
Dolpp1		cell cycle DNA replication (GO:0044786)	25	9	0.16	+	54.97	6.72e-09
Dscc1		cellular nitrogen compound metabolic process (GO:0034641)	2808	52	18.39	+	2.83	9.83e-09
Dtl		nitrogen compound metabolic process (GO:0006807)	5748	78	37.64	+	2.07	1.23e-08
Dusp10		cell division (GO:0051301)	493	22	3.23	+	6.81	2.46e-08
E2f1		macromolecule metabolic process (GO:0043170)	5357	73	35.08	+	2.08	1.35e-07
E2f2		negative regulation of cell cycle (GO:0045786)	330	17	2.16	+	7.87	1.09e-06
E2f8		chromosome organization (GO:0051276)	949	27	6.22	+	4.34	1.47e-06
Fam122b		double-strand break repair (GO:0006302)	180	13	1.18	+	11.03	3.95e-06
Fancf		DNA geometric change (GO:0032392)	38	8	0.25	+	32.15	5.07e-06
Fancg		cellular biosynthetic process (GO:0044249)	2017	39	13.21	+	2.95	5.28e-06
Fen1		organelle organization (GO:0006996)	3215	51	21.06	+	2.42	5.96e-06
Fignl1		mitotic nuclear division (GO:0140014)	155	12	1.02	+	11.82	9.09e-06
Gemin6		biosynthetic process (GO:0009058)	2153	40	14.1	+	2.84	9.39e-06
Gh		organelle fission (GO:0048285)	331	16	2.17	+	7.38	9.58e-06
Gins1		cellular process (GO:0009987)	15109	130	98.95	+	1.31	1.05e-05
Gins3		organic substance biosynthetic process (GO:1901576)	2087	39	13.67	+	2.85	1.38e-05
Gle1		DNA-dependent DNA replication maintenance of fidelity (GO:0045005)	44	8	0.29	+	27.76	1.41e-05
Gmnn		double-strand break repair via homologous recombination (GO:0000724)	95	10	0.62	+	16.07	1.53e-05
Gpt2		negative regulation of cell cycle process (GO:0010948)	247	14	1.62	+	8.65	1.62e-05
Grn		recombinational repair (GO:0000725)	97	10	0.64	+	15.74	1.84e-05
H2afx		nuclear division (GO:0000280)	299	15	1.96	+	7.66	2.03e-05
H2afz		DNA strand elongation involved in DNA replication (GO:0006271)	14	6	0.09	+	65.44	2.23e-05
Haus6		cellular metabolic process (GO:0044237)	6410	76	41.98	+	1.81	3.19e-05
Hmgb1		primary metabolic process (GO:0044238)	6288	75	41.18	+	1.82	4.13e-05
Hmgb2		organic substance metabolic process (GO:0071704)	7017	80	45.95	+	1.74	7.31e-05
Hmgb3		spindle organization (GO:0007051)	149	11	0.98	+	11.27	7.39e-05
Hmgn2		base-excision repair (GO:0006284)	35	7	0.23	+	30.54	8.61e-05
Ifrd2		DNA strand elongation (GO:0022616)	19	6	0.12	+	48.22	9.9e-05
Incenp		regulation of mitotic cell cycle (GO:0007346)	451	17	2.95	+	5.76	0.000101
Kcnb1		DNA conformation change (GO:0071103)	195	12	1.28	+	9.4	0.000104
Kif11		spindle assembly (GO:0051225)	90	9	0.59	+	15.27	0.000155
Kif2c		sister chromatid segregation (GO:0000819)	129	10	0.84	+	11.84	0.000234
Kpna2		DNA replication initiation (GO:0006270)	23	6	0.15	+	39.83	0.00026
Kynu		positive regulation of cell cycle (GO:0045787)	319	14	2.09	+	6.7	0.000356
Lcn10		mitotic sister chromatid segregation (GO:0000070)	106	9	0.69	+	12.96	0.000577
Lig1		microtubule cytoskeleton organization (GO:0000226)	514	17	3.37	+	5.05	0.000633
Lin37		response to stress (GO:0006950)	3231	47	21.16	+	2.22	0.000775
Lin54		mitotic DNA replication (GO:1902969)	13	5	0.09	+	58.73	0.000789
Lsm2		metabolic process (GO:0008152)	7452	80	48.8	+	1.64	0.00113
Mad1l1		regulation of cell cycle phase transition (GO:1901987)	363	14	2.38	+	5.89	0.00164
Mapk12		DNA duplex unwinding (GO:0032508)	34	6	0.22	+	26.95	0.00198
Mcam		regulation of response to DNA damage stimulus (GO:2001020)	219	11	1.43	+	7.67	0.00303
Mcm3		chromosome segregation (GO:0007059)	271	12	1.77	+	6.76	0.00317
Mcm4		regulation of mitotic cell cycle phase transition (GO:1901990)	279	12	1.83	+	6.57	0.00427
Mcm5		DNA integrity checkpoint signaling (GO:0031570)	99	8	0.65	+	12.34	0.00453
Mcm7		positive regulation of cell cycle process (GO:0090068)	232	11	1.52	+	7.24	0.00523
Mcph1		regulation of DNA recombination (GO:0000018)	106	8	0.69	+	11.52	0.00737
Mms22l		cell cycle checkpoint signaling (GO:0000075)	146	9	0.96	+	9.41	0.00739
Mthfd2		pre-replicative complex assembly involved in cell cycle DNA replication (GO:1902299)	8	4	0.05	+	76.35	0.0074
Mutyh		pre-replicative complex assembly involved in nuclear cell cycle DNA replication (GO:0006267)	8	4	0.05	+	76.35	0.0074
Mybpc2		pre-replicative complex assembly (GO:0036388)	8	4	0.05	+	76.35	0.0074
Ncapd2		regulation of double-strand break repair via homologous recombination (GO:0010569)	47	6	0.31	+	19.49	0.011
Ncapd3		regulation of DNA metabolic process (GO:0051052)	370	13	2.42	+	5.36	0.0126
Nek2		negative regulation of cell cycle phase transition (GO:1901988)	204	10	1.34	+	7.49	0.013
Nfatc2ip		cell cycle phase transition (GO:0044770)	160	9	1.05	+	8.59	0.0152
Nr4a1		microtubule cytoskeleton organization involved in mitosis (GO:1902850)	118	8	0.77	+	10.35	0.0157
Nr4a2		cellular component organization (GO:0016043)	5199	60	34.05	+	1.76	0.0162
Nrgn		regulation of double-strand break repair (GO:2000779)	82	7	0.54	+	13.03	0.0171
Nudcd2		centrosome cycle (GO:0007098)	82	7	0.54	+	13.03	0.0171
Palb2		signal transduction in response to DNA damage (GO:0042770)	120	8	0.79	+	10.18	0.0177
Pde4c		nuclear chromosome segregation (GO:0098813)	212	10	1.39	+	7.2	0.0182
Pex19		regulation of DNA repair (GO:0006282)	126	8	0.83	+	9.69	0.025
Pmf1		mitotic spindle organization (GO:0007052)	88	7	0.58	+	12.15	0.0265
Pold1		double-strand break repair via break-induced replication (GO:0000727)	12	4	0.08	+	50.9	0.0267
Pole		cellular component organization or biogenesis (GO:0071840)	5392	61	35.31	+	1.73	0.0325
Polr3g		DNA damage checkpoint signaling (GO:0000077)	93	7	0.61	+	11.49	0.0373
Ppih		microtubule organizing center organization (GO:0031023)	93	7	0.61	+	11.49	0.0373
Prim2		cell population proliferation (GO:0008283)	550	15	3.6	+	4.16	0.0396
Psat1		response to radiation (GO:0009314)	415	13	2.72	+	4.78	0.0425
Pttg1
Rab3b
Racgap1
Rad54b
Rangap1
Rbl1
Rcc1
Rdm1
Rfwd3
Rmi2
Rnf141
Rpa2
Rpp30
Rrm1
Rrm2
Rtel1
Sac3d1
Serpinb1a
Siah1b
Slc1a4
Slc25a10
Slc6a9
Slc7a1
Snrnp25
Spib
Stmn1
Tbc1d31
Tcf19
Tdp1
Thy1
Timeless
Tjp2
Tlr9
Tmco4
Tmpo
Topbp1
Ttf2
Tube1
Ube2t
Ung
Xrcc2
Zranb3

## Sheet: G1 unique
G1 unique
Abca1
Abcb1a
Abhd10
Abtb2		GO analysis
Acod1		Analysis Type:	PANTHER Overrepresentation Test (Released 20210224)
Adam8		Annotation Version and Release Date:	GO Ontology database DOI: 10.5281/zenodo.4735677 Released 2021-05-01
Adamtsl4		Analyzed List:	upload_1 (Mus musculus)
Adgre1		Reference List:	Mus musculus (all genes in database)
Adgrf3		Test Type:	FISHER
Akr1c13		Correction:	BONFERRONI
Anxa1		Bonferroni count:	9060
Apobr		GO biological process complete	Mus musculus - REFLIST (21988)	upload_1 (203)	upload_1 (expected)	upload_1 (over/under)	upload_1 (fold Enrichment)	upload_1 (P-value)
Apold1		Unclassified (UNCLASSIFIED)	1330	8	12.28	-	0.65	0
Aqp9		positive regulation of immune system process (GO:0002684)	1047	41	9.67	+	4.24	6.63e-11
Arap3		regulation of immune system process (GO:0002682)	1522	49	14.05	+	3.49	1.49e-10
Arhgap22		positive regulation of cytokine production (GO:0001819)	481	28	4.44	+	6.31	2.5e-10
Atp8b4		inflammatory response (GO:0006954)	465	27	4.29	+	6.29	7.94e-10
Bcl2a1a		immune system process (GO:0002376)	2516	63	23.23	+	2.71	8.75e-10
Bcl2a1b		positive regulation of response to external stimulus (GO:0032103)	412	25	3.8	+	6.57	2.81e-09
Bcl2a1d		immune response (GO:0006955)	1691	49	15.61	+	3.14	6.95e-09
Bcl6		defense response (GO:0006952)	1449	45	13.38	+	3.36	7.58e-09
Btnl9		regulation of cytokine production (GO:0001817)	742	32	6.85	+	4.67	7.81e-09
C3		response to biotic stimulus (GO:0009607)	1482	43	13.68	+	3.14	2.34e-07
C3ar1		response to other organism (GO:0051707)	1444	42	13.33	+	3.15	3.89e-07
C5ar1		response to external biotic stimulus (GO:0043207)	1446	42	13.35	+	3.15	4.06e-07
Card9		leukocyte migration (GO:0050900)	215	17	1.98	+	8.56	4.58e-07
Casp6		regulation of response to external stimulus (GO:0032101)	905	32	8.36	+	3.83	1.12e-06
Ccl24		response to external stimulus (GO:0009605)	2384	55	22.01	+	2.5	1.68e-06
Ccl3		granulocyte migration (GO:0097530)	97	12	0.9	+	13.4	3.24e-06
Ccl4		myeloid leukocyte migration (GO:0097529)	123	13	1.14	+	11.45	3.49e-06
Ccl6		biological process involved in interspecies interaction between organisms (GO:0044419)	1554	42	14.35	+	2.93	3.54e-06
Ccl9		positive regulation of leukocyte migration (GO:0002687)	152	14	1.4	+	9.98	3.87e-06
Ccr2		response to stress (GO:0006950)	3231	65	29.83	+	2.18	4.83e-06
Ccsap		regulation of leukocyte migration (GO:0002685)	219	16	2.02	+	7.91	5.1e-06
Cd14		granulocyte chemotaxis (GO:0071621)	81	11	0.75	+	14.71	7.3e-06
Cd247		positive regulation of multicellular organismal process (GO:0051240)	1595	42	14.73	+	2.85	7.62e-06
Cd33		leukocyte chemotaxis (GO:0030595)	134	13	1.24	+	10.51	9.21e-06
Cd3g		cell chemotaxis (GO:0060326)	205	15	1.89	+	7.93	1.76e-05
Cd5		innate immune response (GO:0045087)	846	29	7.81	+	3.71	1.82e-05
Cd6		response to interleukin-1 (GO:0070555)	92	11	0.85	+	12.95	2.48e-05
Cd80		neutrophil chemotaxis (GO:0030593)	74	10	0.68	+	14.64	4.57e-05
Cdc14b		cellular response to interleukin-1 (GO:0071347)	76	10	0.7	+	14.25	5.76e-05
Cenpf		defense response to other organism (GO:0098542)	1082	32	9.99	+	3.2	7.84e-05
Cenpk		chemotaxis (GO:0006935)	492	21	4.54	+	4.62	0.000104
Cenpp		taxis (GO:0042330)	497	21	4.59	+	4.58	0.000123
Cenpu		positive regulation of tumor necrosis factor superfamily cytokine production (GO:1903557)	109	11	1.01	+	10.93	0.000126
Cgas		neutrophil migration (GO:1990266)	86	10	0.79	+	12.59	0.00017
Clec4d		response to cytokine (GO:0034097)	768	26	7.09	+	3.67	0.000172
Clec4e		regulation of MAPK cascade (GO:0043408)	714	25	6.59	+	3.79	0.000175
Clec4n		positive regulation of ERK1 and ERK2 cascade (GO:0070374)	220	14	2.03	+	6.89	0.000325
Clec5a		regulation of leukocyte chemotaxis (GO:0002688)	124	11	1.14	+	9.61	0.000432
Col23a1		response to interferon-gamma (GO:0034341)	125	11	1.15	+	9.53	0.000466
Creb5		positive regulation of leukocyte chemotaxis (GO:0002690)	97	10	0.9	+	11.17	0.000484
Crybg3		positive regulation of gene expression (GO:0010628)	1184	32	10.93	+	2.93	0.000606
Csf1r		regulation of multicellular organismal process (GO:0051239)	2813	55	25.97	+	2.12	0.000625
Csta2		monocyte chemotaxis (GO:0002548)	33	7	0.3	+	22.98	0.000632
Csta3		positive regulation of T cell activation (GO:0050870)	201	13	1.86	+	7.01	0.000847
Cstdc4		positive regulation of neutrophil migration (GO:1902624)	36	7	0.33	+	21.06	0.00107
Cxcr2		positive regulation of tumor necrosis factor production (GO:0032760)	107	10	0.99	+	10.12	0.00114
Cyp11a1		positive regulation of MAPK cascade (GO:0043410)	522	20	4.82	+	4.15	0.00128
Cysltr1		cytokine-mediated signaling pathway (GO:0019221)	289	15	2.67	+	5.62	0.00132
Dbf4		regulation of tumor necrosis factor superfamily cytokine production (GO:1903555)	176	12	1.62	+	7.39	0.00157
Dhrs3		regulation of mononuclear cell migration (GO:0071675)	113	10	1.04	+	9.59	0.00182
Dock4		lymphocyte chemotaxis (GO:0048247)	41	7	0.38	+	18.49	0.00235
Dok7		positive regulation of defense response (GO:0031349)	262	14	2.42	+	5.79	0.00249
Dpep2		positive regulation of leukocyte cell-cell adhesion (GO:1903039)	223	13	2.06	+	6.31	0.00263
Dpep3		positive regulation of biological process (GO:0048518)	6225	92	57.47	+	1.6	0.00264
Drp2		mononuclear cell migration (GO:0071674)	89	9	0.82	+	10.95	0.00265
Dusp8		positive regulation of response to stimulus (GO:0048584)	2281	46	21.06	+	2.18	0.00362
E230025N22Rik		regulation of ERK1 and ERK2 cascade (GO:0070372)	315	15	2.91	+	5.16	0.00377
Eepd1		regulation of T cell activation (GO:0050863)	322	15	2.97	+	5.05	0.00492
Egr3		response to chemical (GO:0042221)	3492	61	32.24	+	1.89	0.00537
Eif1ad10		regulation of neutrophil migration (GO:1902622)	48	7	0.44	+	15.8	0.00613
Eif1ad3		regulation of cell migration (GO:0030334)	944	26	8.72	+	2.98	0.0084
Eif1ad4		regulation of tumor necrosis factor production (GO:0032680)	173	11	1.6	+	6.89	0.00988
Eif1ad7		cell surface receptor signaling pathway (GO:0007166)	1910	40	17.63	+	2.27	0.0102
Eif1ad8		regulation of vascular endothelial growth factor production (GO:0010574)	32	6	0.3	+	20.31	0.0107
Eme1		positive regulation of cellular component movement (GO:0051272)	607	20	5.6	+	3.57	0.0126
Emp1		response to organic substance (GO:0010033)	2545	48	23.5	+	2.04	0.0135
Erv3		cellular response to cytokine stimulus (GO:0071345)	670	21	6.19	+	3.39	0.0146
Evi5		regulation of granulocyte chemotaxis (GO:0071622)	56	7	0.52	+	13.54	0.0157
Eya2		regulation of locomotion (GO:0040012)	1045	27	9.65	+	2.8	0.0167
F5		positive regulation of cell migration (GO:0030335)	566	19	5.23	+	3.64	0.018
Fam20c		positive regulation of cell-cell adhesion (GO:0022409)	267	13	2.47	+	5.27	0.018
Fam71f2		regulation of intracellular signal transduction (GO:1902531)	1594	35	14.72	+	2.38	0.0186
Fanci		regulation of response to stimulus (GO:0048583)	3913	64	36.13	+	1.77	0.0194
Fblim1		regulation of leukocyte cell-cell adhesion (GO:1903037)	314	14	2.9	+	4.83	0.0194
Fbxo48		leukocyte cell-cell adhesion (GO:0007159)	58	7	0.54	+	13.07	0.0195
Fcer1g		positive regulation of chemotaxis (GO:0050921)	150	10	1.38	+	7.22	0.0206
Fcgr1		regulation of cell motility (GO:2000145)	995	26	9.19	+	2.83	0.0216
Fcrl6		regulation of chemotaxis (GO:0050920)	229	12	2.11	+	5.68	0.0219
Fgd4		antifungal innate immune response (GO:0061760)	8	4	0.07	+	54.16	0.0288
Fnip2		positive regulation of leukocyte activation (GO:0002696)	530	18	4.89	+	3.68	0.0289
Fosl2		signal transduction in absence of ligand (GO:0038034)	39	6	0.36	+	16.66	0.0298
Gas2l1		extrinsic apoptotic signaling pathway in absence of ligand (GO:0097192)	39	6	0.36	+	16.66	0.0298
Gcnt1		regulation of cellular component movement (GO:0051270)	1081	27	9.98	+	2.71	0.0309
Gm550		positive regulation of cell motility (GO:2000147)	590	19	5.45	+	3.49	0.0322
Gm6525		lymphocyte migration (GO:0072676)	64	7	0.59	+	11.85	0.0355
Gpr141		positive regulation of cell activation (GO:0050867)	545	18	5.03	+	3.58	0.042
H2-Aa		positive regulation of developmental process (GO:0051094)	1431	32	13.21	+	2.42	0.0429
H2-Eb1		amyloid-beta clearance (GO:0097242)	23	5	0.21	+	23.55	0.0458
Hcar2		positive regulation of locomotion (GO:0040017)	607	19	5.6	+	3.39	0.0478
Hjurp		positive regulation of intracellular signal transduction (GO:1902533)	977	25	9.02	+	2.77	0.049
Hjurp
Hmx2
Hmx3
Id1
Ifi202b
Ifi207
Ifi27
Ifitm6
Il1a
Il1b
Il1rn
Incenp
Itgam
Itgax
Jam2
Kbtbd6
Kif18b
Kifc5b
Klra2
Klrd1
Klri2
Lilr4b
Lrp1
Lrrc49
Mmp10
Mmp12
Mmp13
Mmp19
Mmp8
Mpeg1
Ms4a4a
Ms4a6d
Msr1
Mturn
Mxd3
Myo16
Myo1a
Myof
Naaladl1
Nbl1
Nek6
Nemp1
Nemp1
Neo1
Nes
Nrxn3
Oas2
Olfm1
Olfml2b
Olfr1258
Osbp2
P2ry6
Pilra
Pilrb1
Pilrb2
Plxdc2
Prune2
Psrc1
Pstpip2
Ptpn5
Rab7b
Rad54l
Raet1d
Raet1e
Rbm47
Rnf223
Robo2
Rttn
S100a11
Scimp
Sectm1a
Sell
Septin8
Serpinb2
Serpinb8
Serpinb9g
Shisa3
Siah1b
Sirpa
Slco4c1
Slfn1
Smox
Ssc4d
St18
Stfa1
Stfa2
Sult1d1
Syt1
Sytl2
Tanc2
Tent5c
Tex14
Tex52
Thbs1
Tlr13
Tmem132a
Tmem171
Tnfsf14
Tnip3
Traf1
Trim16
Tspan8
Wfdc17
Zfand2a
Zfp473

## Sheet: both
G0 and G1
Anln
Aplf
Arhgap19
Arhgef39		GO analysis
Asf1b		Analysis Type:	PANTHER Overrepresentation Test (Released 20210224)
Aspm		Annotation Version and Release Date:	GO Ontology database DOI: 10.5281/zenodo.4735677 Released 2021-05-01
Aunip		Analyzed List:	upload_1 (Mus musculus)
Aurka		Reference List:	Mus musculus (all genes in database)
Aurkb		Test Type:	FISHER
Bard1		Correction:	BONFERRONI
BC030867/Hrob		Bonferroni count:	9060
Birc5		GO biological process complete	Mus musculus - REFLIST (21988)	upload_1 (153)	upload_1 (expected)	upload_1 (over/under)	upload_1 (fold Enrichment)	upload_1 (P-value)
Blm		Unclassified (UNCLASSIFIED)	1330	4	9.25	-	0.43	0
Brca1		cell cycle (GO:0007049)	1191	107	8.29	+	12.91	4.72e-92
Brip1		cell cycle process (GO:0022402)	759	84	5.28	+	15.9	2.82e-74
Bub1		mitotic cell cycle (GO:0000278)	546	77	3.8	+	20.27	3.38e-74
Bub1b		mitotic cell cycle process (GO:1903047)	478	73	3.33	+	21.95	6.17e-72
Ccdc15		cell division (GO:0051301)	493	67	3.43	+	19.53	5.47e-62
Ccdc18		chromosome segregation (GO:0007059)	271	55	1.89	+	29.17	6.85e-58
Ccna2		nuclear division (GO:0000280)	299	51	2.08	+	24.51	9.91e-50
Ccnb1		organelle fission (GO:0048285)	331	52	2.3	+	22.58	3.58e-49
Ccnb2		nuclear chromosome segregation (GO:0098813)	212	43	1.48	+	29.15	7.09e-44
Cdc20		sister chromatid segregation (GO:0000819)	129	36	0.9	+	40.11	2.65e-40
Cdc25c		mitotic nuclear division (GO:0140014)	155	37	1.08	+	34.31	2.26e-39
Cdc45		regulation of cell cycle (GO:0051726)	965	61	6.71	+	9.08	3.71e-37
Cdca2		mitotic sister chromatid segregation (GO:0000070)	106	32	0.74	+	43.38	2.69e-36
Cdca3		chromosome organization (GO:0051276)	949	58	6.6	+	8.78	3.55e-34
Cdca5		regulation of cell cycle process (GO:0010564)	623	50	4.34	+	11.53	7.56e-34
Cdca8		organelle organization (GO:0006996)	3215	88	22.37	+	3.93	3.4e-30
Cdk1		microtubule cytoskeleton organization (GO:0000226)	514	42	3.58	+	11.74	7.55e-28
Cenpa		microtubule cytoskeleton organization involved in mitosis (GO:1902850)	118	26	0.82	+	31.67	9.89e-26
Cenpe		microtubule-based process (GO:0007017)	771	46	5.36	+	8.57	2.27e-25
Cenph		spindle organization (GO:0007051)	149	26	1.04	+	25.08	2.07e-23
Cenpi		regulation of mitotic cell cycle (GO:0007346)	451	35	3.14	+	11.15	9.2e-22
Cenpl		meiotic cell cycle (GO:0051321)	299	30	2.08	+	14.42	4.2e-21
Cenpn		meiotic nuclear division (GO:0140013)	169	25	1.18	+	21.26	8.73e-21
Cenpw		regulation of cell cycle phase transition (GO:1901987)	363	31	2.53	+	12.27	5.51e-20
Cep128		meiotic cell cycle process (GO:1903046)	185	25	1.29	+	19.42	6.58e-20
Cep55		cellular component organization (GO:0016043)	5199	95	36.18	+	2.63	7.31e-20
Chtf18		regulation of chromosome segregation (GO:0051983)	85	20	0.59	+	33.81	1.49e-19
Cip2a		mitotic spindle organization (GO:0007052)	88	20	0.61	+	32.66	2.72e-19
Cit		cytoskeleton organization (GO:0007010)	1110	46	7.72	+	5.96	5.35e-19
Ckap2l		cellular component organization or biogenesis (GO:0071840)	5392	95	37.52	+	2.53	1.17e-18
Cks1b		cellular response to DNA damage stimulus (GO:0006974)	674	37	4.69	+	7.89	2.61e-18
Cks2		positive regulation of cell cycle process (GO:0090068)	232	25	1.61	+	15.49	1.04e-17
Clspn		regulation of mitotic sister chromatid separation (GO:0010965)	61	17	0.42	+	40.05	2.98e-17
Ddias		positive regulation of cell cycle (GO:0045787)	319	27	2.22	+	12.16	7.4e-17
Depdc1a		regulation of sister chromatid segregation (GO:0033045)	68	17	0.47	+	35.93	1.45e-16
Depdc1b		regulation of chromosome separation (GO:1905818)	68	17	0.47	+	35.93	1.45e-16
Diaph3		DNA repair (GO:0006281)	443	30	3.08	+	9.73	1.57e-16
Dlgap5		DNA metabolic process (GO:0006259)	636	34	4.43	+	7.68	3.69e-16
Dsn1		regulation of mitotic cell cycle phase transition (GO:1901990)	279	25	1.94	+	12.88	6.46e-16
Ect2		mitotic cell cycle checkpoint signaling (GO:0007093)	121	19	0.84	+	22.57	1.72e-15
Efcab11		cell cycle checkpoint signaling (GO:0000075)	146	20	1.02	+	19.69	2.09e-15
Ercc6l		negative regulation of cell cycle process (GO:0010948)	247	23	1.72	+	13.38	9.91e-15
Esco2		regulation of mitotic metaphase/anaphase transition (GO:0030071)	57	15	0.4	+	37.82	1.45e-14
Espl1		regulation of nuclear division (GO:0051783)	142	19	0.99	+	19.23	2.59e-14
Exo1		regulation of metaphase/anaphase transition of cell cycle (GO:1902099)	60	15	0.42	+	35.93	2.81e-14
Fam167a		regulation of mitotic sister chromatid segregation (GO:0033047)	45	14	0.31	+	44.71	2.85e-14
Fam72a		negative regulation of cell cycle phase transition (GO:1901988)	204	21	1.42	+	14.79	5.34e-14
Fam83d		regulation of organelle organization (GO:0033043)	1198	41	8.34	+	4.92	1.52e-13
Fancb		regulation of mitotic nuclear division (GO:0007088)	109	17	0.76	+	22.41	1.66e-13
Fancd2		regulation of chromosome organization (GO:0033044)	289	23	2.01	+	11.44	2.48e-13
Foxm1		mitotic spindle checkpoint signaling (GO:0071174)	28	12	0.19	+	61.59	3.28e-13
Gen1		spindle checkpoint signaling (GO:0031577)	29	12	0.2	+	59.47	4.61e-13
Gtse1		negative regulation of chromosome segregation (GO:0051985)	32	12	0.22	+	53.89	1.21e-12
Haspin		negative regulation of mitotic cell cycle (GO:0045930)	212	20	1.48	+	13.56	1.64e-12
Hmmr		negative regulation of cell cycle (GO:0045786)	330	23	2.3	+	10.02	3.7e-12
Iqgap3		DNA conformation change (GO:0071103)	195	19	1.36	+	14	5.62e-12
Kif14		mitotic spindle assembly checkpoint signaling (GO:0007094)	26	11	0.18	+	60.8	7.91e-12
Kif15		spindle assembly checkpoint signaling (GO:0071173)	26	11	0.18	+	60.8	7.91e-12
Kif18a		negative regulation of chromosome organization (GO:2001251)	75	14	0.52	+	26.83	1.37e-11
Kif20a		negative regulation of mitotic metaphase/anaphase transition (GO:0045841)	28	11	0.19	+	56.46	1.53e-11
Kif20b		negative regulation of mitotic cell cycle phase transition (GO:1901991)	147	17	1.02	+	16.62	1.54e-11
Kif22		kinetochore organization (GO:0051383)	18	10	0.13	+	79.84	1.97e-11
Kif23		negative regulation of mitotic sister chromatid separation (GO:2000816)	29	11	0.2	+	54.51	2.1e-11
Kif24		negative regulation of mitotic sister chromatid segregation (GO:0033048)	29	11	0.2	+	54.51	2.1e-11
Kif4		negative regulation of sister chromatid segregation (GO:0033046)	29	11	0.2	+	54.51	2.1e-11
Kifc1		double-strand break repair (GO:0006302)	180	18	1.25	+	14.37	2.25e-11
Knl1		meiotic chromosome segregation (GO:0045132)	100	15	0.7	+	21.56	2.34e-11
Knstrn		negative regulation of metaphase/anaphase transition of cell cycle (GO:1902100)	30	11	0.21	+	52.69	2.85e-11
Kntc1		negative regulation of chromosome separation (GO:1905819)	31	11	0.22	+	50.99	3.85e-11
Lin9		cell cycle phase transition (GO:0044770)	160	17	1.11	+	15.27	5.56e-11
Lrr1		DNA recombination (GO:0006310)	209	18	1.45	+	12.38	2.47e-10
Lsm3		negative regulation of mitotic nuclear division (GO:0045839)	38	11	0.26	+	41.6	2.51e-10
Mad2l1		establishment of chromosome localization (GO:0051303)	75	13	0.52	+	24.91	3.4e-10
Map3k20		mitotic cell cycle phase transition (GO:0044772)	150	16	1.04	+	15.33	3.42e-10
Mastl		cellular response to stress (GO:0033554)	1445	40	10.05	+	3.98	4.09e-10
Mcm10		metaphase plate congression (GO:0051310)	57	12	0.4	+	30.26	4.36e-10
Mcm8		meiosis I (GO:0007127)	125	15	0.87	+	17.25	4.6e-10
Melk		chromosome localization (GO:0050000)	77	13	0.54	+	24.26	4.6e-10
Mis18a		meiosis I cell cycle process (GO:0061982)	127	15	0.88	+	16.97	5.69e-10
Mis18bp1		establishment of organelle localization (GO:0051656)	345	21	2.4	+	8.75	9.47e-10
Mki67		mitotic metaphase plate congression (GO:0007080)	45	11	0.31	+	35.13	1.23e-09
Mns1		negative regulation of nuclear division (GO:0051784)	47	11	0.33	+	33.63	1.86e-09
Mtfr2		spindle assembly (GO:0051225)	90	13	0.63	+	20.76	2.78e-09
Mybl2		protein localization to chromosome, centromeric region (GO:0071459)	21	9	0.15	+	61.59	3.24e-09
Ncapg		protein localization to chromosome (GO:0034502)	70	12	0.49	+	24.64	3.79e-09
Ncapg2		reproduction (GO:0000003)	1481	39	10.31	+	3.78	4.27e-09
Ncaph		cytokinesis (GO:0000910)	97	13	0.67	+	19.26	6.6e-09
Ndc1		centromere complex assembly (GO:0034508)	25	9	0.17	+	51.74	1.16e-08
Ndc80		chromosome condensation (GO:0030261)	40	10	0.28	+	35.93	1.35e-08
Nsl1		female meiotic nuclear division (GO:0007143)	41	10	0.29	+	35.05	1.68e-08
Nuf2		reproductive process (GO:0022414)	1480	38	10.3	+	3.69	1.94e-08
Nusap1		organelle assembly (GO:0070925)	692	26	4.82	+	5.4	3.8e-08
Oip5		mitotic cytokinesis (GO:0000281)	65	11	0.45	+	24.32	4.21e-08
Parpbp		cytoskeleton-dependent cytokinesis (GO:0061640)	90	12	0.63	+	19.16	5.5e-08
Pbk		organelle localization (GO:0051640)	486	22	3.38	+	6.51	6.48e-08
Pif1		cell cycle G2/M phase transition (GO:0044839)	49	10	0.34	+	29.33	7.86e-08
Pimreg		DNA packaging (GO:0006323)	152	14	1.06	+	13.24	8.98e-08
Pkmyt1		cellular component assembly (GO:0022607)	2071	44	14.41	+	3.05	1.19e-07
Plk1		regulation of cytokinesis (GO:0032465)	80	11	0.56	+	19.76	3.18e-07
Plk4		chromosome organization involved in meiotic cell cycle (GO:0070192)	80	11	0.56	+	19.76	3.18e-07
Poc1a		female gamete generation (GO:0007292)	148	13	1.03	+	12.62	8.79e-07
Polq		protein localization to condensed chromosome (GO:1903083)	15	7	0.1	+	67.07	9.28e-07
Prc1		protein localization to kinetochore (GO:0034501)	15	7	0.1	+	67.07	9.28e-07
Prr11		double-strand break repair via homologous recombination (GO:0000724)	95	11	0.66	+	16.64	1.71e-06
Psrc1		recombinational repair (GO:0000725)	97	11	0.67	+	16.3	2.1e-06
Rad18		cellular macromolecule metabolic process (GO:0044260)	3960	61	27.56	+	2.21	2.52e-06
Rad51		regulation of cell division (GO:0051302)	163	13	1.13	+	11.46	2.67e-06
Rad51ap1		protein-DNA complex assembly (GO:0065004)	130	12	0.9	+	13.27	2.8e-06
Rad51b		cellular component biogenesis (GO:0044085)	2297	44	15.98	+	2.75	3.28e-06
Recql4		gamete generation (GO:0007276)	737	24	5.13	+	4.68	4.63e-06
Sapcd2		spindle localization (GO:0051653)	56	9	0.39	+	23.1	5.9e-06
Sass6		nucleic acid metabolic process (GO:0090304)	1754	37	12.2	+	3.03	9.73e-06
Sgo1		regulation of cellular component organization (GO:0051128)	2479	45	17.25	+	2.61	1.06e-05
Sgo2a		regulation of DNA metabolic process (GO:0051052)	370	17	2.57	+	6.6	1.5e-05
Shcbp1		cellular process (GO:0009987)	15109	137	105.13	+	1.3	1.82e-05
Ska1		sister chromatid cohesion (GO:0007062)	43	8	0.3	+	26.74	1.94e-05
Ska3		mitotic chromosome condensation (GO:0007076)	13	6	0.09	+	66.33	2.25e-05
Smc2		regulation of attachment of spindle microtubules to kinetochore (GO:0051988)	13	6	0.09	+	66.33	2.25e-05
Smc4		kinetochore assembly (GO:0051382)	13	6	0.09	+	66.33	2.25e-05
Spag5		regulation of G2/M transition of mitotic cell cycle (GO:0010389)	94	10	0.65	+	15.29	2.5e-05
Spc24		G2/M transition of mitotic cell cycle (GO:0000086)	45	8	0.31	+	25.55	2.67e-05
Spc25		negative regulation of organelle organization (GO:0010639)	341	16	2.37	+	6.74	3.5e-05
Spdl1		mitotic spindle assembly (GO:0090307)	48	8	0.33	+	23.95	4.2e-05
Spp1		regulation of cell cycle G2/M phase transition (GO:1902749)	102	10	0.71	+	14.09	5.18e-05
Stil		protein-DNA complex subunit organization (GO:0071824)	172	12	1.2	+	10.03	5.47e-05
Suv39h1		DNA replication (GO:0006260)	174	12	1.21	+	9.91	6.17e-05
Tacc3		establishment of spindle localization (GO:0051293)	51	8	0.35	+	22.54	6.45e-05
Tedc1		positive regulation of cell cycle phase transition (GO:1901989)	107	10	0.74	+	13.43	7.93e-05
Ticrr		multicellular organismal reproductive process (GO:0048609)	861	24	5.99	+	4.01	8.93e-05
Top2a		centrosome cycle (GO:0007098)	82	9	0.57	+	15.77	0.000124
Tpx2		multicellular organism reproduction (GO:0032504)	878	24	6.11	+	3.93	0.000129
Traip		meiotic spindle organization (GO:0000212)	19	6	0.13	+	45.38	0.000142
Trip13		establishment of mitotic spindle localization (GO:0040001)	36	7	0.25	+	27.94	0.000155
Troap		sexual reproduction (GO:0019953)	895	24	6.23	+	3.85	0.000183
Ttk		establishment of spindle orientation (GO:0051294)	38	7	0.26	+	26.47	0.000216
Ube2c		regulation of DNA repair (GO:0006282)	126	10	0.88	+	11.41	0.000338
Wdr62		microtubule organizing center organization (GO:0031023)	93	9	0.65	+	13.91	0.00034
Xkr5		spindle assembly involved in meiosis (GO:0090306)	10	5	0.07	+	71.86	0.00038
Zfp101		cellular process involved in reproduction in multicellular organism (GO:0022412)	466	17	3.24	+	5.24	0.000396
Zwilch		regulation of microtubule-based process (GO:0032886)	256	13	1.78	+	7.3	0.00045
		intracellular signal transduction (GO:0035556)	1355	29	9.43	+	3.08	0.000656
		regulation of response to DNA damage stimulus (GO:2001020)	219	12	1.52	+	7.87	0.000685
		female meiosis I (GO:0007144)	13	5	0.09	+	55.27	0.00107
		regulation of double-strand break repair (GO:2000779)	82	8	0.57	+	14.02	0.00188
		protein phosphorylation (GO:0006468)	655	19	4.56	+	4.17	0.00198
		establishment of mitotic spindle orientation (GO:0000132)	32	6	0.22	+	26.95	0.00206
		multi-organism reproductive process (GO:0044703)	1023	24	7.12	+	3.37	0.00207
		protein localization to organelle (GO:0033365)	659	19	4.59	+	4.14	0.00217
		positive regulation of cytokinesis (GO:0032467)	33	6	0.23	+	26.13	0.00242
		spindle assembly involved in female meiosis I (GO:0007057)	5	4	0.03	+	> 100	0.00244
		signal transduction in response to DNA damage (GO:0042770)	120	9	0.84	+	10.78	0.0026
		multi-organism process (GO:0051704)	1040	24	7.24	+	3.32	0.00278
		positive regulation of mitotic cell cycle phase transition (GO:1901992)	87	8	0.61	+	13.21	0.00287
		centrosome duplication (GO:0051298)	35	6	0.24	+	24.64	0.00329
		nucleobase-containing compound metabolic process (GO:0006139)	2174	37	15.13	+	2.45	0.00334
		mitotic G2 DNA damage checkpoint signaling (GO:0007095)	36	6	0.25	+	23.95	0.00382
		spindle assembly involved in female meiosis (GO:0007056)	6	4	0.04	+	95.81	0.00404
		mitotic spindle midzone assembly (GO:0051256)	6	4	0.04	+	95.81	0.00404
		mitotic spindle elongation (GO:0000022)	6	4	0.04	+	95.81	0.00404
		response to ionizing radiation (GO:0010212)	127	9	0.88	+	10.18	0.00408
		regulation of cell cycle checkpoint (GO:1901976)	37	6	0.26	+	23.3	0.00441
		cellular localization (GO:0051641)	2214	37	15.41	+	2.4	0.0045
		DNA damage checkpoint signaling (GO:0000077)	93	8	0.65	+	12.36	0.0046
		regulation of spindle checkpoint (GO:0090231)	19	5	0.13	+	37.82	0.00511
		spindle elongation (GO:0051231)	7	4	0.05	+	82.12	0.00631
		DNA integrity checkpoint signaling (GO:0031570)	99	8	0.69	+	11.61	0.00717
		protein localization to microtubule cytoskeleton (GO:0072698)	41	6	0.29	+	21.03	0.0076
		attachment of spindle microtubules to kinetochore (GO:0008608)	21	5	0.15	+	34.22	0.00782
		female meiosis chromosome segregation (GO:0016321)	8	4	0.06	+	71.86	0.00942
		heterocycle metabolic process (GO:0046483)	2296	37	15.98	+	2.32	0.00958
		regulation of transferase activity (GO:0051338)	881	21	6.13	+	3.43	0.01
		response to external stimulus (GO:0009605)	2384	1	16.59	-	0.06	0.0101
		homologous chromosome segregation (GO:0045143)	71	7	0.49	+	14.17	0.0104
		regulation of DNA recombination (GO:0000018)	106	8	0.74	+	10.85	0.0116
		protein localization to cytoskeleton (GO:0044380)	45	6	0.31	+	19.16	0.0125
		mitotic DNA damage checkpoint signaling (GO:0044773)	74	7	0.51	+	13.59	0.0135
		regulation of cyclin-dependent protein serine/threonine kinase activity (GO:0000079)	74	7	0.51	+	13.59	0.0135
		spindle midzone assembly (GO:0051255)	9	4	0.06	+	63.87	0.0135
		negative regulation of cellular component organization (GO:0051129)	748	19	5.2	+	3.65	0.0138
		regulation of double-strand break repair via homologous recombination (GO:0010569)	47	6	0.33	+	18.35	0.0157
		mitotic DNA integrity checkpoint signaling (GO:0044774)	77	7	0.54	+	13.06	0.0172
		mitotic G2/M transition checkpoint (GO:0044818)	48	6	0.33	+	17.96	0.0176
		DNA-dependent DNA replication (GO:0006261)	113	8	0.79	+	10.17	0.0182
		regulation of cyclin-dependent protein kinase activity (GO:1904029)	78	7	0.54	+	12.9	0.0187
		positive regulation of cell cycle checkpoint (GO:1901978)	10	4	0.07	+	57.48	0.0188
		cellular aromatic compound metabolic process (GO:0006725)	2378	37	16.55	+	2.24	0.0247
		reciprocal meiotic recombination (GO:0007131)	53	6	0.37	+	16.27	0.0298
		reciprocal homologous recombination (GO:0140527)	53	6	0.37	+	16.27	0.0298
		positive regulation of mitotic cell cycle (GO:0045931)	122	8	0.85	+	9.42	0.0312
		homologous recombination (GO:0035825)	54	6	0.38	+	15.97	0.0329
		interstrand cross-link repair (GO:0036297)	31	5	0.22	+	23.18	0.0424
		regulation of meiotic cell cycle (GO:0051445)	57	6	0.4	+	15.13	0.0439
		negative regulation of G2/M transition of mitotic cell cycle (GO:0010972)	58	6	0.4	+	14.87	0.0482
